# Supplementary material
Source: Research Square preprint supplement (doi:10.21203/rs.3.rs-9541370/v1)
Supplement: Supplementary file 1 [file 1275006ac7d9ecb41e65e1cb.xlsx]

## Sheet: david_upregulated
Category	Term	Count	%	PValue	Genes	List Total	Pop Hits	Pop Total	Fold Enrichment	Bonferroni	Benjamini	FDR
GOTERM_CC_DIRECT	GO:0005829~cytosol	19	8.29694	0.00112326	WBGENE00021698, WBGENE00022149, WBGENE00020324, WBGENE00000835, WBGENE00010370, WBGENE00001101, WBGENE00006931, WBGENE00020842, WBGENE00004679, WBGENE00022306, WBGENE00013924, WBGENE00004195, WBGENE00017777, WBGENE00011146, WBGENE00015434, WBGENE00012930, WBGENE00010988, WBGENE00044063, WBGENE00011128	187	553	12839	2.35895	0.164581	0.179721	17.9721
GOTERM_BP_DIRECT	GO:0042176~regulation of protein catabolic process	3	1.31004	0.00505228	WBGENE00006349, WBGENE00007009, WBGENE00004459	161	7	10016	26.6619	0.893949	1	100
GOTERM_BP_DIRECT	GO:0006869~lipid transport	5	2.18341	0.00607626	WBGENE00002263, WBGENE00021095, WBGENE00006926, WBGENE00006930, WBGENE00012930	161	46	10016	6.76208	0.932794	1	100
GOTERM_BP_DIRECT	GO:0007530~sex determination	3	1.31004	0.0104908	WBGENE00001411, WBGENE00006605, WBGENE00004747	161	10	10016	18.6634	0.990646	1	100
GOTERM_BP_DIRECT	GO:0043161~proteasome-mediated ubiquitin-dependent protein catabolic process	6	2.62009	0.0132204	WBGENE00013924, WBGENE00000097, WBGENE00001411, WBGENE00004505, WBGENE00007009, WBGENE00004459	161	88	10016	4.24167	0.997249	1	100
GOTERM_CC_DIRECT	GO:0005743~mitochondrial inner membrane	8	3.49345	0.0167773	WBGENE00000206, WBGENE00020110, WBGENE00009740, WBGENE00018934, WBGENE00017777, WBGENE00011662, WBGENE00011146, WBGENE00015391	187	182	12839	3.01792	0.933273	1	100
GOTERM_MF_DIRECT	GO:0005319~lipid transporter activity	3	1.31004	0.0181595	WBGENE00021095, WBGENE00006926, WBGENE00006930	164	13	10043	14.1318	0.996463	1	100
PFAM	PF01484:Col_cuticle_N	7	3.05677	0.0213021	WBGENE00000723, WBGENE00000739, WBGENE00000608, WBGENE00000693, WBGENE00013489, WBGENE00000656, WBGENE00000754	186	159	13642	3.22898	0.995694	1	100
GOTERM_BP_DIRECT	GO:0048680~positive regulation of axon regeneration	3	1.31004	0.0232336	WBGENE00001177, WBGENE00006508, WBGENE00020504	161	15	10016	12.4422	0.99997	1	100
GOTERM_CC_DIRECT	GO:0005737~cytoplasm	50	21.8341	0.0240699	WBGENE00004807, WBGENE00001411, WBGENE00010370, WBGENE00002223, WBGENE00003086, WBGENE00000097, WBGENE00022042, WBGENE00008296, WBGENE00014208, WBGENE00012943, WBGENE00015293, WBGENE00019770, WBGENE00014001, WBGENE00003941, WBGENE00001169, WBGENE00004679, WBGENE00004085, WBGENE00010473, WBGENE00020391, WBGENE00019609, WBGENE00014119, WBGENE00013866, WBGENE00013140, WBGENE00019001, WBGENE00001516,…	187	2589	12839	1.32595	0.979723	1	100
GOTERM_CC_DIRECT	GO:0000139~Golgi membrane	8	3.49345	0.0304289	WBGENE00009435, WBGENE00011329, WBGENE00012371, WBGENE00000088, WBGENE00000464, WBGENE00001645, WBGENE00004769, WBGENE00004756	187	206	12839	2.66632	0.992876	1	100
PFAM	PF00244:14-3-3	2	0.873362	0.0401369	WBGENE00001502, WBGENE00003920	186	3	13642	48.8961	0.999968	1	100
GOTERM_MF_DIRECT	GO:0016887~ATP hydrolysis activity	9	3.93013	0.0408792	WBGENE00004195, WBGENE00001812, WBGENE00021277, WBGENE00022531, WBGENE00020110, WBGENE00020391, WBGENE00002223, WBGENE00004505, WBGENE00014208	164	239	10043	2.30603	0.999997	1	100
GOTERM_BP_DIRECT	GO:0040018~positive regulation of multicellular organism growth	4	1.74672	0.0410024	WBGENE00011559, WBGENE00016343, WBGENE00011146, WBGENE00021073	161	48	10016	5.18427	1	1	100
PFAM	PF01391:Collagen	6	2.62009	0.0419327	WBGENE00000723, WBGENE00000739, WBGENE00000608, WBGENE00013489, WBGENE00000656, WBGENE00000754	186	140	13642	3.14332	0.99998	1	100
GOTERM_CC_DIRECT	GO:0005581~collagen trimer	7	3.05677	0.0420077	WBGENE00000723, WBGENE00000739, WBGENE00000608, WBGENE00000693, WBGENE00013489, WBGENE00000656, WBGENE00000754	187	175	12839	2.74631	0.998958	1	100
GOTERM_BP_DIRECT	GO:0006096~glycolytic process	3	1.31004	0.0436657	WBGENE00019001, WBGENE00014001, WBGENE00022306	161	21	10016	8.88731	1	1	100
GOTERM_BP_DIRECT	GO:0010629~negative regulation of gene expression	5	2.18341	0.0452515	WBGENE00004807, WBGENE00001502, WBGENE00004747, WBGENE00003920, WBGENE00004679	161	84	10016	3.70305	1	1	100
GOTERM_CC_DIRECT	GO:0005840~ribosome	7	3.05677	0.0471526	WBGENE00018793, WBGENE00004419, WBGENE00019744, WBGENE00004498, WBGENE00016249, WBGENE00004436, WBGENE00004429	187	180	12839	2.67002	0.99956	1	100
GOTERM_CC_DIRECT	GO:0005789~endoplasmic reticulum membrane	10	4.36681	0.0502516	WBGENE00022677, WBGENE00019276, WBGENE00001405, WBGENE00012371, WBGENE00018423, WBGENE00020216, WBGENE00004769, WBGENE00011776, WBGENE00011116, WBGENE00004756	187	329	12839	2.08686	0.999739	1	100
GOTERM_MF_DIRECT	GO:0042302~structural constituent of cuticle	7	3.05677	0.0588228	WBGENE00000723, WBGENE00000739, WBGENE00000608, WBGENE00000693, WBGENE00013489, WBGENE00000656, WBGENE00000754	164	170	10043	2.52156	1	1	100
GOTERM_BP_DIRECT	GO:0002181~cytoplasmic translation	3	1.31004	0.0641898	WBGENE00004498, WBGENE00004436, WBGENE00004429	161	26	10016	7.17821	1	1	100
GOTERM_BP_DIRECT	GO:0006487~protein N-linked glycosylation	3	1.31004	0.0686184	WBGENE00022677, WBGENE00019276, WBGENE00001645	161	27	10016	6.91235	1	1	100
GOTERM_CC_DIRECT	GO:0042765~GPI-anchor transamidase complex	2	0.873362	0.0703776	WBGENE00018006, WBGENE00011776	187	5	12839	27.4631	0.999992	1	100
GOTERM_BP_DIRECT	GO:0016255~attachment of GPI anchor to protein	2	0.873362	0.0773758	WBGENE00018006, WBGENE00011776	161	5	10016	24.8845	1	1	100
GOTERM_BP_DIRECT	GO:0051457~maintenance of protein location in nucleus	2	0.873362	0.0773758	WBGENE00001502, WBGENE00003920	161	5	10016	24.8845	1	1	100
GOTERM_CC_DIRECT	GO:1990904~ribonucleoprotein complex	7	3.05677	0.0783131	WBGENE00018793, WBGENE00004419, WBGENE00004498, WBGENE00016249, WBGENE00004436, WBGENE00045383, WBGENE00004429	187	205	12839	2.34441	0.999998	1	100
PFAM	PF09172:Vit_open_b-sht	2	0.873362	0.0786711	WBGENE00006926, WBGENE00006930	186	6	13642	24.448	1	1	100
PFAM	PF13589:HATPase_c_3	2	0.873362	0.0786711	WBGENE00022531, WBGENE00020110	186	6	13642	24.448	1	1	100
PFAM	PF01347:Vitellogenin_N	2	0.873362	0.0786711	WBGENE00006926, WBGENE00006930	186	6	13642	24.448	1	1	100
GOTERM_CC_DIRECT	GO:0005739~mitochondrion	16	6.9869	0.0797286	WBGENE00022336, WBGENE00014095, WBGENE00018793, WBGENE00000206, WBGENE00019677, WBGENE00020110, WBGENE00000114, WBGENE00015391, WBGENE00022306, WBGENE00010303, WBGENE00012608, WBGENE00001151, WBGENE00016249, WBGENE00018934, WBGENE00017777, WBGENE00011662	187	695	12839	1.58061	0.999998	1	100
KEGG_PATHWAY	cel04150:mTOR signaling pathway	5	2.18341	0.0858947	WBGENE00022402, WBGENE00013140, WBGENE00002163, WBGENE00010130, WBGENE00001101	68	79	3147	2.92908	0.999008	1	100
GOTERM_CC_DIRECT	GO:0005783~endoplasmic reticulum	11	4.80349	0.0869241	WBGENE00022677, WBGENE00019276, WBGENE00001405, WBGENE00018423, WBGENE00014001, WBGENE00000097, WBGENE00009829, WBGENE00013667, WBGENE00020216, WBGENE00004769, WBGENE00011776	187	422	12839	1.78966	1	1	100
KEGG_PATHWAY	cel00190:Oxidative phosphorylation	6	2.62009	0.0907124	WBGENE00022336, WBGENE00000206, WBGENE00008149, WBGENE00009740, WBGENE00010130, WBGENE00015391	68	113	3147	2.45731	0.999339	1	100
GOTERM_MF_DIRECT	GO:0045735~nutrient reservoir activity	2	0.873362	0.0935368	WBGENE00006926, WBGENE00006930	164	6	10043	20.4126	1	1	100
GOTERM_MF_DIRECT	GO:0004022~alcohol dehydrogenase (NAD+) activity	2	0.873362	0.0935368	WBGENE00000967, WBGENE00012608	164	6	10043	20.4126	1	1	100
GOTERM_BP_DIRECT	GO:0015031~protein transport	8	3.49345	0.0944912	WBGENE00003086, WBGENE00012371, WBGENE00013311, WBGENE00018934, WBGENE00003941, WBGENE00022042, WBGENE00006931, WBGENE00004756	161	243	10016	2.0481	1	1	100

## Sheet: david_downregulated
Category	Term	Count	%	PValue	Genes	List Total	Pop Hits	Pop Total	Fold Enrichment	Bonferroni	Benjamini	FDR
GOTERM_CC_DIRECT	GO:0005730~nucleolus	6	5.55556	0.00419835	WBGENE00004681, WBGENE00020695, WBGENE00020296, WBGENE00015486, WBGENE00011043, WBGENE00012676	76	182	12839	5.56926	0.312325	0.373653	37.3653
GOTERM_MF_DIRECT	GO:0005524~ATP binding	14	12.963	0.0148629	WBGENE00012360, WBGENE00016059, WBGENE00001816, WBGENE00002147, WBGENE00002202, WBGENE00002037, WBGENE00006968, WBGENE00003961, WBGENE00303021, WBGENE00006961, WBGENE00003073, WBGENE00010845, WBGENE00011500, WBGENE00020190	69	995	10043	2.04795	0.920395	1	100
GOTERM_MF_DIRECT	GO:0016787~hydrolase activity	9	8.33333	0.0240541	WBGENE00006575, WBGENE00006961, WBGENE00015486, WBGENE00016123, WBGENE00002147, WBGENE00017515, WBGENE00012585, WBGENE00011511, WBGENE00010845	69	522	10043	2.5095	0.983671	1	100
GOTERM_BP_DIRECT	GO:0016477~cell migration	3	2.77778	0.0446745	WBGENE00001980, WBGENE00006805, WBGENE00001821	66	52	10016	8.75524	0.999974	1	100
GOTERM_CC_DIRECT	GO:0005634~nucleus	23	21.2963	0.0688659	WBGENE00018420, WBGENE00003806, WBGENE00018892, WBGENE00020695, WBGENE00022434, WBGENE00020296, WBGENE00015486, WBGENE00013111, WBGENE00011043, WBGENE00002202, WBGENE00003961, WBGENE00001821, WBGENE00003218, WBGENE00003789, WBGENE00007625, WBGENE00004681, WBGENE00003690, WBGENE00006961, WBGENE00008413, WBGENE00002011, WBGENE00016622, WBGENE00012676, WBGENE00010845	76	2762	12839	1.40677	0.998254	1	100
GOTERM_BP_DIRECT	GO:0045944~positive regulation of transcription by RNA polymerase II	5	4.62963	0.0744069	WBGENE00006575, WBGENE00013111, WBGENE00002147, WBGENE00003218, WBGENE00010845	66	245	10016	3.09709	1	1	100
GOTERM_BP_DIRECT	GO:0007506~gonadal mesoderm development	2	1.85185	0.0812037	WBGENE00012676, WBGENE00003218	66	13	10016	23.3473	1	1	100
GOTERM_MF_DIRECT	GO:0004867~serine-type endopeptidase inhibitor activity	3	2.77778	0.0833342	WBGENE00013481, WBGENE00019647, WBGENE00010613	69	71	10043	6.15003	1	1	100
GOTERM_BP_DIRECT	GO:0006325~chromatin organization	3	2.77778	0.087061	WBGENE00006961, WBGENE00020296, WBGENE00010845	66	76	10016	5.99043	1	1	100
