# Supplementary material
Source: Research Square preprint supplement (doi:10.21203/rs.3.rs-9541370/v1)
Supplement: Supplementary file 2 [file 23eead91d4a1de55ec71bef6.xlsx]

## Sheet: david_upregulated
Category	Term	Count	%	PValue	Genes	List Total	Pop Hits	Pop Total	Fold Enrichment	Bonferroni	Benjamini	FDR	annotation_1	negative Log10 p value
GOTERM_BP_DIRECT	GO:0002181~cytoplasmic translation	5	4.42478	0.00231666	WBGENE00004408, WBGENE00004497, WBGENE00004440, WBGENE00004434, WBGENE00004417	80	25	3416	8.54	0.389832	0.491131	49.1131	rla-0, rps-28, rpl-26, rpl-22, rpl-6	2.63514
GOTERM_BP_DIRECT	GO:0006412~translation	11	9.73451	0.0133017	WBGENE00002083, WBGENE00004476, WBGENE00004497, WBGENE00012361, WBGENE00004440, WBGENE00004434, WBGENE00004433, WBGENE00004490, WBGENE00004417, WBGENE00004449, WBGENE00004438	80	195	3416	2.40872	0.942287	1	100	inf-1, rps-7, rps-28, mrpl-12, rpl-26, rpl-22, rpl-21, rps-21, rpl-6, rpl-35, rpl-25.1	1.87609
GOTERM_BP_DIRECT	GO:0000027~ribosomal large subunit assembly	3	2.65487	0.0401466	WBGENE00004408, WBGENE00004417, WBGENE00004438	80	14	3416	9.15	0.999838	1	100	rla-0, rpl-6, rpl-25.1	1.39635
GOTERM_BP_DIRECT	GO:0006730~one-carbon metabolic process	3	2.65487	0.0456409	WBGENE00019322, WBGENE00000282, WBGENE00019492	80	15	3416	8.54	0.999952	1	100	ahcy-1, cah-4, CELE_K07E3.4	1.34065
GOTERM_BP_DIRECT	GO:0006166~purine ribonucleoside salvage	2	1.76991	0.0893839	WBGENE00012803, WBGENE00011128	80	4	3416	21.35	1	1	100	CELE_Y43F4B.5, adk-1	1.04874
GOTERM_CC_DIRECT	GO:0022625~cytosolic large ribosomal subunit	8	7.07965	4.19762e-05	WBGENE00004408, WBGENE00004440, WBGENE00004433, WBGENE00004444, WBGENE00004418, WBGENE00004417, WBGENE00004449, WBGENE00004438	81	46	3754	8.06012	0.00255733	0.00256055	0.256055	rla-0, rpl-26, rpl-21, rpl-30, rpl-7, rpl-6, rpl-35, rpl-25.1	4.377
GOTERM_CC_DIRECT	GO:0005840~ribosome	12	10.6195	0.000312574	WBGENE00004408, WBGENE00004476, WBGENE00004497, WBGENE00012361, WBGENE00004440, WBGENE00004434, WBGENE00004433, WBGENE00004418, WBGENE00004490, WBGENE00004417, WBGENE00004449, WBGENE00004438	81	152	3754	3.65887	0.0188893	0.00953352	0.953352	rla-0, rps-7, rps-28, mrpl-12, rpl-26, rpl-22, rpl-21, rpl-7, rps-21, rpl-6, rpl-35, rpl-25.1	3.50505
GOTERM_CC_DIRECT	GO:0005829~cytosol	19	16.8142	0.000473306	WBGENE00019322, WBGENE00022104, WBGENE00016103, WBGENE00020185, WBGENE00015781, WBGENE00012909, WBGENE00004417, WBGENE00018491, WBGENE00000963, WBGENE00006730, WBGENE00008117, WBGENE00009012, WBGENE00004497, WBGENE00000040, WBGENE00001173, WBGENE00016415, WBGENE00011232, WBGENE00004490, WBGENE00011128	81	364	3754	2.41914	0.0284655	0.00962389	0.962389	ahcy-1, acsd-1, dpyd-1, pgk-1, rml-3, spds-1, rpl-6, mdh-1, dhp-1, uev-1, gsr-1, SRP54, rps-28, aco-1, egl-4, ampd-1, pck-2, rps-21, adk-1	3.32486
GOTERM_CC_DIRECT	GO:1990904~ribonucleoprotein complex	12	10.6195	0.000776814	WBGENE00004408, WBGENE00004476, WBGENE00004497, WBGENE00012361, WBGENE00004440, WBGENE00004434, WBGENE00004433, WBGENE00004418, WBGENE00004490, WBGENE00004417, WBGENE00004449, WBGENE00004438	81	169	3754	3.29082	0.046298	0.0118464	1.18464	rla-0, rps-7, rps-28, mrpl-12, rpl-26, rpl-22, rpl-21, rpl-7, rps-21, rpl-6, rpl-35, rpl-25.1	3.10968
GOTERM_CC_DIRECT	GO:0005791~rough endoplasmic reticulum	3	2.65487	0.0146528	WBGENE00004497, WBGENE00004490, WBGENE00004417	81	9	3754	15.4486	0.593606	0.178764	17.8764	rps-28, rps-21, rpl-6	1.83408
GOTERM_MF_DIRECT	GO:0020037~heme binding	9	7.9646	2.80379e-05	WBGENE00017121, WBGENE00014030, WBGENE00010707, WBGENE00007848, WBGENE00014697, WBGENE00010706, WBGENE00019472, WBGENE00017968, WBGENE00000831	97	46	3471	7.00112	0.00444816	0.00445802	0.445802	cyc-2.1, glb-1, cyp-14a3, cytb-5.1, cyp-25a3, cyp-14a2, cyp-35b1, skpo-3, ctl-2	4.55226
GOTERM_MF_DIRECT	GO:0003735~structural constituent of ribosome	13	11.5044	0.00024172	WBGENE00004408, WBGENE00012361, WBGENE00004434, WBGENE00004433, WBGENE00004444, WBGENE00004418, WBGENE00004417, WBGENE00004449, WBGENE00004438, WBGENE00004476, WBGENE00004497, WBGENE00004440, WBGENE00004490	97	133	3471	3.49764	0.0377088	0.0192168	1.92168	rla-0, mrpl-12, rpl-22, rpl-21, rpl-30, rpl-7, rpl-6, rpl-35, rpl-25.1, rps-7, rps-28, rpl-26, rps-21	3.61669
GOTERM_MF_DIRECT	GO:0004497~monooxygenase activity	5	4.42478	0.0180483	WBGENE00010707, WBGENE00014697, WBGENE00010706, WBGENE00011089, WBGENE00019472	97	37	3471	4.83561	0.944751	0.641379	64.1379	cyp-14a3, cyp-25a3, cyp-14a2, kmo-1, cyp-35b1	1.74356
GOTERM_MF_DIRECT	GO:0008757~S-adenosylmethionine-dependent methyltransferase activity	3	2.65487	0.0190159	WBGENE00021487, WBGENE00018811, WBGENE00021491	97	8	3471	13.4188	0.952766	0.641379	64.1379	comt-3, pmt-2, comt-4	1.72088
GOTERM_MF_DIRECT	GO:0003824~catalytic activity	9	7.9646	0.0201691	WBGENE00011416, WBGENE00009126, WBGENE00018682, WBGENE00019620, WBGENE00001790, WBGENE00012909, WBGENE00019329, WBGENE00018519, WBGENE00018491	97	124	3471	2.59719	0.960823	0.641379	64.1379	CELE_T04A11.1, pyk-1, aagr-4, fah-1, gst-42, spds-1, ceeh-1, F46H5.3, mdh-1	1.69531
GOTERM_MF_DIRECT	GO:0016853~isomerase activity	5	4.42478	0.0395746	WBGENE00011416, WBGENE00001428, WBGENE00016045, WBGENE00001790, WBGENE00001430	97	47	3471	3.80676	0.998372	0.857705	85.7705	CELE_T04A11.1, fkb-3, spas-1, gst-42, fkb-5	1.40258
GOTERM_MF_DIRECT	GO:0005506~iron ion binding	5	4.42478	0.0451015	WBGENE00014030, WBGENE00010707, WBGENE00014697, WBGENE00010706, WBGENE00019472	97	49	3471	3.65138	0.99935	0.857705	85.7705	glb-1, cyp-14a3, cyp-25a3, cyp-14a2, cyp-35b1	1.34581
GOTERM_MF_DIRECT	GO:0016491~oxidoreductase activity	12	10.6195	0.0479246	WBGENE00000118, WBGENE00008117, WBGENE00002891, WBGENE00016103, WBGENE00008333, WBGENE00017537, WBGENE00000991, WBGENE00000113, WBGENE00021647, WBGENE00012149, WBGENE00018491, WBGENE00019978	97	228	3471	1.88334	0.999594	0.857705	85.7705	alh-12, gsr-1, let-767, dpyd-1, C55A6.4, CELE_F17A9.5, dhs-28, alh-7, CELE_Y47G6A.22, CELE_VF13D12L.3, mdh-1, hacd-1	1.31944
GOTERM_MF_DIRECT	GO:0016705~oxidoreductase activity, acting on paired donors, with incorporation or reduction of molecular oxygen	4	3.53982	0.0485494	WBGENE00010707, WBGENE00014697, WBGENE00010706, WBGENE00019472	97	30	3471	4.77113	0.999634	0.857705	85.7705	cyp-14a3, cyp-25a3, cyp-14a2, cyp-35b1	1.31382
GOTERM_MF_DIRECT	GO:0008171~O-methyltransferase activity	2	1.76991	0.0807221	WBGENE00021487, WBGENE00021491	97	3	3471	23.8557	0.999998	1	100	comt-3, comt-4	1.09301
GOTERM_MF_DIRECT	GO:0022857~transmembrane transporter activity	5	4.42478	0.0950844	WBGENE00013083, WBGENE00008110, WBGENE00012443, WBGENE00000002, WBGENE00016879	97	63	3471	2.83996	1	1	100	CELE_Y51A2D.18, C46C2.2, CELE_Y15E3A.4, aat-1, cnnm-1	1.02189
KEGG_PATHWAY	cel03010:Ribosome	13	11.5044	0.000157131	WBGENE00004408, WBGENE00012361, WBGENE00004434, WBGENE00004433, WBGENE00004444, WBGENE00004418, WBGENE00004417, WBGENE00004449, WBGENE00004438, WBGENE00004476, WBGENE00004497, WBGENE00004440, WBGENE00004490	54	119	1726	3.49175	0.0100068	0.0100564	0.989924	rla-0, mrpl-12, rpl-22, rpl-21, rpl-30, rpl-7, rpl-6, rpl-35, rpl-25.1, rps-7, rps-28, rpl-26, rps-21	3.80374
KEGG_PATHWAY	cel01100:Metabolic pathways	33	29.2035	0.0014246	WBGENE00019322, WBGENE00017121, WBGENE00015781, WBGENE00021286, WBGENE00019620, WBGENE00012909, WBGENE00001752, WBGENE00018491, WBGENE00000963, WBGENE00009126, WBGENE00010665, WBGENE00008117, WBGENE00012803, WBGENE00002891, WBGENE00011232, WBGENE00019978, WBGENE00000118, WBGENE00018682, WBGENE00022104, WBGENE00011095, WBGENE00016103, WBGENE00020185, WBGENE00020166, WBGENE00000113, WBGENE00019492,…	54	681	1726	1.54887	0.0872008	0.0455872	4.48749	ahcy-1, cyc-2.1, rml-3, tald-1, fah-1, spds-1, gst-4, mdh-1, dhp-1, pyk-1, rml-1, gsr-1, CELE_Y43F4B.5, let-767, pck-2, hacd-1, alh-12, aagr-4, acsd-1, gana-1, dpyd-1, pgk-1, CELE_T02G5.7, alh-7, CELE_K07E3.4, ctl-2, C06A6.4, semo-1, aco-1, gst-42, ampd-1, kmo-1, adk-1	2.84631
KEGG_PATHWAY	cel00380:Tryptophan metabolism	6	5.30973	0.00318818	WBGENE00000118, WBGENE00022104, WBGENE00020166, WBGENE00011089, WBGENE00019978, WBGENE00000831	54	34	1726	5.64052	0.184839	0.0680145	6.69518	alh-12, acsd-1, CELE_T02G5.7, kmo-1, hacd-1, ctl-2	2.49646
KEGG_PATHWAY	cel00620:Pyruvate metabolism	5	4.42478	0.0150686	WBGENE00000118, WBGENE00009126, WBGENE00020166, WBGENE00011232, WBGENE00018491	54	32	1726	4.99421	0.621571	0.241097	23.733	alh-12, pyk-1, CELE_T02G5.7, pck-2, mdh-1	1.82193
KEGG_PATHWAY	cel00010:Glycolysis / Gluconeogenesis	5	4.42478	0.0270081	WBGENE00000118, WBGENE00009126, WBGENE00012803, WBGENE00020185, WBGENE00011232	54	38	1726	4.20565	0.826624	0.345704	34.0302	alh-12, pyk-1, CELE_Y43F4B.5, pgk-1, pck-2	1.56851
KEGG_PATHWAY	cel00630:Glyoxylate and dicarboxylate metabolism	4	3.53982	0.0619076	WBGENE00000040, WBGENE00020166, WBGENE00018491, WBGENE00000831	54	30	1726	4.26173	0.983261	0.660348	65.003	aco-1, CELE_T02G5.7, mdh-1, ctl-2	1.20826
KEGG_PATHWAY	cel01200:Carbon metabolism	7	6.19469	0.0757739	WBGENE00009126, WBGENE00000040, WBGENE00020185, WBGENE00020166, WBGENE00021286, WBGENE00018491, WBGENE00000831	54	98	1726	2.28307	0.993546	0.69279	68.1965	pyk-1, aco-1, pgk-1, CELE_T02G5.7, tald-1, mdh-1, ctl-2	1.12048
PFAM	PF00067:p450	4	3.53982	0.0257984	WBGENE00010707, WBGENE00014697, WBGENE00010706, WBGENE00019472	108	25	4124	6.10963	0.969076	1	100	cyp-14a3, cyp-25a3, cyp-14a2, cyp-35b1	1.58841
PFAM	PF00448:SRP54	2	1.76991	0.0512243	WBGENE00009012, WBGENE00009521	108	2	4124	38.1852	0.999082	1	100	SRP54, CELE_F38A1.8	1.29052
PFAM	PF02881:SRP54_N	2	1.76991	0.0512243	WBGENE00009012, WBGENE00009521	108	2	4124	38.1852	0.999082	1	100	SRP54, CELE_F38A1.8	1.29052
PFAM	PF01596:Methyltransf_3	2	1.76991	0.0758529	WBGENE00021487, WBGENE00021491	108	3	4124	25.4568	0.999972	1	100	comt-3, comt-4	1.12003

## Sheet: david_downregulated
Category	Term	Count	%	PValue	Genes	List Total	Pop Hits	Pop Total	Fold Enrichment	Bonferroni	Benjamini	FDR	annotation_1	negative Log10 p value
GOTERM_BP_DIRECT	GO:0030334~regulation of cell migration	3	4.05405	0.0405536	WBGENE00002173, WBGENE00006769, WBGENE00000424	49	23	3416	9.09317	0.999286	1	100	itr-1, unc-33, ced-10	1.39197
GOTERM_BP_DIRECT	GO:0031115~negative regulation of microtubule polymerization	2	2.7027	0.041577	WBGENE00006769, WBGENE00000424	49	3	3416	46.4762	0.999408	1	100	unc-33, ced-10	1.38115
GOTERM_BP_DIRECT	GO:0051793~medium-chain fatty acid catabolic process	2	2.7027	0.041577	WBGENE00020366, WBGENE00020812	49	3	3416	46.4762	0.999408	1	100	acdh-10, acdh-7	1.38115
GOTERM_BP_DIRECT	GO:0030950~establishment or maintenance of actin cytoskeleton polarity	2	2.7027	0.0550561	WBGENE00006769, WBGENE00000424	49	4	3416	34.8571	0.99995	1	100	unc-33, ced-10	1.25919
GOTERM_BP_DIRECT	GO:0061643~chemorepulsion of axon	2	2.7027	0.0683496	WBGENE00006769, WBGENE00000424	49	5	3416	27.8857	0.999996	1	100	unc-33, ced-10	1.16526
GOTERM_BP_DIRECT	GO:1905815~regulation of dorsal/ventral axon guidance	2	2.7027	0.0683496	WBGENE00006769, WBGENE00000424	49	5	3416	27.8857	0.999996	1	100	unc-33, ced-10	1.16526
GOTERM_BP_DIRECT	GO:0038007~netrin-activated signaling pathway	2	2.7027	0.0943895	WBGENE00006769, WBGENE00000424	49	7	3416	19.9184	1	1	100	unc-33, ced-10	1.02508
GOTERM_CC_DIRECT	GO:0005938~cell cortex	5	6.75676	0.00420283	WBGENE00004075, WBGENE00003980, WBGENE00000509, WBGENE00000200, WBGENE00003989	57	45	3754	7.31774	0.264682	0.306806	30.6806	pod-1, pes-7, cka-1, arx-2, pfn-1	2.37646
GOTERM_CC_DIRECT	GO:0005856~cytoskeleton	6	8.10811	0.0454309	WBGENE00000140, WBGENE00001488, WBGENE00000200, WBGENE00003989, WBGENE00006876, WBGENE00000424	57	132	3754	2.99362	0.966431	1	100	anc-1, frm-1, arx-2, pfn-1, vab-10, ced-10	1.34265
GOTERM_CC_DIRECT	GO:0005640~nuclear outer membrane	2	2.7027	0.0583705	WBGENE00000140, WBGENE00021093	57	4	3754	32.9298	0.987605	1	100	anc-1, CELE_W08F4.3	1.23381
GOTERM_MF_DIRECT	GO:0005509~calcium ion binding	7	9.45946	0.00140886	WBGENE00044355, WBGENE00002173, WBGENE00003893, WBGENE00019760, WBGENE00003588, WBGENE00020481, WBGENE00013855	57	78	3471	5.46491	0.154454	0.167655	16.7655	CELE_ZK563.7, itr-1, ost-1, calu-1, nex-1, CELE_T13C2.6, cubn-1	2.85113
GOTERM_MF_DIRECT	GO:0003779~actin binding	5	6.75676	0.0230521	WBGENE00000140, WBGENE00001488, WBGENE00000200, WBGENE00003989, WBGENE00006876	57	68	3471	4.47755	0.93767	1	100	anc-1, frm-1, arx-2, pfn-1, vab-10	1.63729
GOTERM_MF_DIRECT	GO:0070991~medium-chain fatty acyl-CoA dehydrogenase activity	2	2.7027	0.0320116	WBGENE00020366, WBGENE00020812	57	2	3471	60.8947	0.979177	1	100	acdh-10, acdh-7	1.49469
GOTERM_MF_DIRECT	GO:0051015~actin filament binding	4	5.40541	0.074253	WBGENE00004075, WBGENE00003980, WBGENE00000200, WBGENE00006876	57	61	3471	3.9931	0.999897	1	100	pod-1, pes-7, arx-2, vab-10	1.12929
KEGG_PATHWAY	cel01250:Biosynthesis of nucleotide sugars	3	4.05405	0.0281377	WBGENE00009006, WBGENE00014013, WBGENE00007965	22	22	1726	10.6983	0.671463	0.697157	69.7157	CELE_F21D5.1, ZK632.4, C36A4.4	1.55071
KEGG_PATHWAY	cel00520:Amino sugar and nucleotide sugar metabolism	3	4.05405	0.0357516	WBGENE00009006, WBGENE00014013, WBGENE00007965	22	25	1726	9.41455	0.758249	0.697157	69.7157	CELE_F21D5.1, ZK632.4, C36A4.4	1.4467
KEGG_PATHWAY	cel04148:Efferocytosis	3	4.05405	0.0659378	WBGENE00010872, WBGENE00012907, WBGENE00000424	22	35	1726	6.72468	0.930071	0.857191	85.7191	CELE_M05B5.4, cpt-1, ced-10	1.18087
KEGG_PATHWAY	cel00071:Fatty acid degradation	3	4.05405	0.0944483	WBGENE00020366, WBGENE00012907, WBGENE00020812	22	43	1726	5.47357	0.979125	0.920871	92.0871	acdh-10, cpt-1, acdh-7	1.02481
PFAM	PF00307:CH	3	4.05405	0.034468	WBGENE00000140, WBGENE00003980, WBGENE00006876	62	20	4124	9.97742	0.976556	1	100	anc-1, pes-7, vab-10	1.46258
PFAM	PF07645:EGF_CA	2	2.7027	0.0991263	WBGENE00020481, WBGENE00013855	62	7	4124	19.0046	0.999986	1	100	CELE_T13C2.6, cubn-1	1.00381
