# Supplementary material
Source: Research Square preprint supplement (doi:10.21203/rs.3.rs-9541370/v1)
Supplement: Supplementary file 3 [file 29824a802bc1fb38378e8f55.xlsx]

## Sheet: Sheet1
Protein IDs	Gene name	Protein names	logFC D10 / D1	logFC D12 / D1	logFC D13 / D1	logFC D14 / D1	logFC D15 / D1	logFC D16 / D1	logFC D2 / D1	logFC D3 / D1	logFC D4 / D1	logFC D5 / D1	logFC D6 / D1	logFC D7 / D1	logFC D8 / D1	logFC D9 / D1	Significant_direction D10 / D1	Significant_direction D12 / D1	Significant_direction D13 / D1	Significant_direction D14 / D1	Significant_direction D15 / D1	Significant_direction D16 / D1	Significant_direction D2 / D1	Significant_direction D3 / D1	Significant_direction D4 / D1	Significant_direction D5 / D1	Significant_direction D6 / D1	Significant_direction D7 / D1	Significant_direction D8 / D1	Significant_direction D9 / D1
Q86MP1	col-95	Col_cuticle_N domain-containing protein	2.587	3.356	0.331	0.249	0.449	0.907	7.618	7.854	7.202	7.012	6.193	4.931	3.504	2.836	up	up					up	up	up	up	up	up	up	up
G5EC96	CELE_F02D8.4	Peptidase_M14 domain-containing protein	-1.507	-1.807	-1.214	-0.949	-1.088	-1.08	-2.228	-2.235	-2.19	-2.207	-2.232	-1.875	-1.562	-1.752	down	down	down	down	down	down	down	down	down	down	down	down	down	down
Q20282	col-139	Col_cuticle_N domain-containing protein	-4.539	-5.341	-4.887	-4.02	-4.152	-4.287	-6.542	-5.719	-4.976	-5.185	-5.017	-4.645	-5.396	-4.471	down	down	down	down	down	down	down	down	down	down	down	down	down	down
H2FLH1	CELE_F58E6.13	Uncharacterized protein	-5.318	-4.607	-3.925	-4.048	-3.693	-3.899	-4.318	-4.932	-4.592	-4.633	-5.197	-4.631	-4.248	-4.111	down	down	down	down	down	down	down	down	down	down	down	down	down	down
Q21556	col-129	Col_cuticle_N domain-containing protein	-5.197	-4.85	-4.823	-4.801	-4.893	-5.135	-5.44	-6.254	-5.527	-5.203	-5.403	-5.325	-5.717	-5.135	down	down	down	down	down	down	down	down	down	down	down	down	down	down
Q10576	dpy-18	Prolyl 4-hydroxylase subunit alpha-1	-2.543	-2.594	-2.62	-2.944	-2.703	-2.748	-1.476	-1.755	-2.209	-2.022	-2.428	-2.379	-2.313	-2.789	down	down	down	down	down	down	down	down	down	down	down	down	down	down
Q23246	ssp-34	Sperm-specific class P protein 34	-3.148	-3.467	-3.279	-3.023	-3.361	-2.852	-3.249	-4.503	-4.199	-3.478	-3.724	-2.931	-3.712	-3.104	down	down	down	down	down	down	down	down	down	down	down	down	down	down
Q19680	CELE_F21D5.1	Phosphoacetylglucosamine mutase	1.121	1.074	1.333	1.287	1.304	1.254	1.137	1.207	1.301	1.276	1.282	1.059	1.128	1.243	up	up	up	up	up	up	up	up	up	up	up	up	up	up
Q19823	CELE_F26F4.2	Uncharacterized protein	-4.812	-4.387	-4.398	-4.395	-3.976	-3.743	-5.071	-5.316	-4.988	-4.57	-5.658	-4.193	-4.236	-5.042	down	down	down	down	down	down	down	down	down	down	down	down	down	down
Q21871	CELE_R09E10.6	Uncharacterized protein	-4.742	-4.446	-4.224	-3.798	-4.151	-3.608	-4.213	-4.856	-5.035	-4.071	-4.7	-4.206	-5.031	-4.571	down	down	down	down	down	down	down	down	down	down	down	down	down	down
A3FPJ3	CELE_F07G6.10	Uncharacterized protein	-0.887	-1.983	-0.594	-0.724	-1.139	-1.16	-2.84	-1.894	-1.23	-1.373	-1.121	-1.757	-1.101	-1.27	down	down		down	down	down	down	down	down	down	down	down	down	down
Q18990	pyr-1	CAD protein	-1.962	-1.934	-1.965	-2.052	-1.898	-2.102	-1.072	-1.506	-2.116	-2.031	-2.221	-2.264	-2.078	-2	down	down	down	down	down	down	down	down	down	down	down	down	down	down
P91499	ssp-16	Sperm-specific class P protein 16	-4.329	-3.801	-3.518	-4.05	-3.238	-3.313	-4.045	-4.314	-4.161	-3.982	-3.842	-4.72	-4.361	-3.979	down	down	down	down	down	down	down	down	down	down	down	down	down	down
Q22125	zig-6	Zwei Ig domain protein zig-6	0.969	1.217	1.249	1.234	1.473	1.171	-2.12	-1.992	-0.833	-0.716	-0.2	-0.285	0.204	0.393	up	up	up	up	up	up	down	down	down	down
O44551	CELE_K06A5.2	Uncharacterized protein	-4.383	-3.823	-3.143	-3.405	-3.538	-2.853	-4.364	-3.659	-4.073	-4.208	-4.173	-3.931	-3.324	-3.006	down	down	down	down	down	down	down	down	down	down	down	down	down	down
Q21897	CELE_R105.1	Uncharacterized protein	-4.713	-4.518	-3.958	-4.128	-3.917	-3.567	-4.822	-5.327	-4.83	-4.218	-4.573	-4.714	-5.339	-4.22	down	down	down	down	down	down	down	down	down	down	down	down	down	down
Q22396	nas-20	Zinc metalloproteinase nas-20	0.103	0.292	0.377	0.554	0.447	0.071	-4.82	-1.576	-1.558	-0.834	-1.054	0.42	-1.678	0.619							down	down	down				down
G5ECT2	CELE_F15E6.3	RNA binding protein	8.001	8.13	7.812	7.78	7.929	8.483	3.131	6.741	8.173	7.82	8.521	8.146	7.946	7.881	up	up	up	up	up	up	up	up	up	up	up	up	up	up
Q20075	CELE_F35H10.2	Uncharacterized protein	-0.24	0.268	0.55	0.701	0.733	0.615	-2.019	-1.3	-0.525	-0.467	-0.161	0.025	-0.438	-0.19				up	up	up	down	down
Q09657	CELE_ZK1320.9	Acetyl-CoA hydrolase	-0.121	-0.062	-0.552	-0.583	-0.768	-0.621	0.917	0.696	0.631	0.918	0.579	0.339	-0.058	0.128			down	down	down	down	up	up	up	up	up	up
Q22018	dtmk-1	Thymidylate kinase	-1	-1.286	-0.867	-0.71	-0.692	-0.496	-1.026	-1.432	-1.505	-1.356	-1.376	-1.402	-1.013	-1.162	down	down	down	down	down	down	down	down	down	down	down	down	down	down
O17944	CELE_K10C3.5	Tr-type G domain-containing protein	-0.957	-0.918	-0.894	-0.849	-0.832	-0.807	-0.817	-1.056	-1.092	-0.815	-1.261	-0.959	-1.1	-1.011	down	down	down	down	down	down	down	down	down	down	down	down	down	down
G5EET2	dut-1	Deoxyuridinetriphosphatase	1.995	1.993	2.603	2.659	2.582	2.756	1.618	1.402	1.139	1.281	1.522	1.463	2.039	2.087	up	up	up	up	up	up	up	up	up	up	up	up	up	up
P54816	lex-1	Tat-binding homolog 7	1.657	1.828	2.071	2.002	2.063	2.062	1.101	0.995	1.262	1.368	1.53	1.197	1.796	1.847	up	up	up	up	up	up	up	up	up	up	up	up	up	up
O76715	CELE_F36H12.5	Uncharacterized protein	-3.201	-2.955	-2.821	-2.439	-2.737	-2.493	-3.474	-3.116	-2.428	-2.663	-4.057	-2.743	-2.841	-3.723	down	down	down	down	down	down	down	down	down	down	down	down	down	down
G5ECE7	C34E7.4	Uncharacterized protein	-1.536	-1.475	-2.099	-2.025	-2.125	-1.712	-1.61	-1.919	-2.086	-2.119	-1.688	-2.091	-1.21	-1.88	down	down	down	down	down	down	down	down	down	down	down	down	down	down
Q20643	CELE_F52B5.2	Protein kinase domain-containing protein	1.228	1.179	1.535	1.592	1.625	1.54	1.144	1.296	1.402	1.574	1.362	1.241	1.297	1.547	up	up	up	up	up	up	up	up	up	up	up	up	up	up
Q9U2C8	CELE_Y47D3A.13	Uncharacterized protein	-2.899	-2.247	-2.719	-2.277	-1.925	-1.645	-3.063	-3.552	-2.93	-2.594	-2.802	-2.763	-2.807	-2.751	down	down	down	down	down	down	down	down	down	down	down	down	down	down
G5EDY3	skr-7	Skp1-related protein	0.355	0.563	0.833	0.658	0.43	0.534	1.906	1.782	1.098	1.268	1.227	0.975	0.93	1.063			up	up			up	up	up	up	up	up	up	up
O45494	hinf-1	HIstone Nuclear Factor p (P) homolog	3.482	3.722	3.936	3.658	3.838	4.42	3.371	3.12	2.101	2.678	1.925	1.722	3.635	3.392	up	up	up	up	up	up	up	up	up	up	up	up	up	up
Q9U2D6	cnp-2	Calcineurin-interacting protein 2	-0.714	-0.394	-0.276	-0.333	-0.314	-0.247	-0.883	-0.911	-0.845	-0.746	-0.805	-0.657	-0.896	-0.718	down	down	down	down	down		down	down	down	down	down	down	down	down
Q95Q60	fkb-5	Peptidylprolyl isomerase	-3.404	-3.613	-4.115	-4.2	-4.041	-4.058	-1.565	-2.312	-2.737	-2.96	-2.944	-3.544	-3.346	-3.882	down	down	down	down	down	down	down	down	down	down	down	down	down	down
G5EEJ7	msd-2	MSP domain-containing protein	-7.907	-9.526	-6.846	-7.489	-6.963	-6.898	-3.719	-8.246	-7.994	-7.735	-8.236	-8.377	-8.169	-7.272	down	down	down	down	down	down	down	down	down	down	down	down	down	down
O01829;Q21289	ssp-19	Sperm-specific class P protein 19;Sperm-specific class P protein 10	-5.592	-5.086	-4.129	-4.546	-4.285	-3.68	-4.003	-5.19	-4.715	-3.757	-5.396	-4.95	-5.402	-4.239	down	down	down	down	down	down	down	down	down	down	down	down	down	down
P91276	ima-2	Importin subunit alpha-2	0.405	0.265	0.455	0.419	0.329	0.391	1.204	1.123	0.965	0.774	0.955	0.566	0.675	0.697			up	up		up	up	up	up	up	up	up	up	up
G5EE01	daf-18	Phosphatidylinositol 3,4,5-trisphosphate 3-phosphatase and dual-specificity protein phosphatase daf-18	2.055	2.072	2.66	2.757	2.707	2.55	1.493	1.462	1.359	1.548	1.684	1.496	2.493	2.378	up	up	up	up	up	up	up	up	up	up	up	up	up	up
O45367	CELE_F14H3.6	Uncharacterized protein	2.959	3.107	4.05	4.296	4.334	4.496	2.613	1.942	1.152	1.375	1.697	1.967	3.24	2.78	up	up	up	up	up	up	up	up	up	up	up	up	up	up
Q20287	CELE_F41G3.6	Uncharacterized protein	1.007	1.074	1.149	1.187	1.183	1.298	1.143	1.095	0.939	0.897	1.215	0.889	1.259	1.268	up	up	up	up	up	up	up	up	up	up	up	up	up	up
O17642	col-179	Col_cuticle_N domain-containing protein	-8.345	-7.827	-7.043	-7.617	-7.058	-6.823	-3.973	-5.988	-6.964	-7.802	-7.163	-7.496	-7.475	-8.287	down	down	down	down	down	down	down	down	down	down	down	down	down	down
Q22279	anmt-3	Amine N-MethylTransferase	-2.28	-2.969	-2.104	-2.035	-2.1	-1.962	-2.803	-2.853	-3.134	-2.498	-4.039	-2.773	-2.355	-2.534	down	down	down	down	down	down	down	down	down	down	down	down	down	down
P0A9F1	mntR	Transcriptional regulator MntR	4.34	3.285	4.455	4.478	3.29	4.354	3.626	4.087	4.095	4.23	4.609	4.091	4.221	4.234	up	up	up	up	up	up	up	up	up	up	up	up	up	up
Q9XVU2	gln-5	Glutamine synthetase	1.95	1.923	2.614	2.791	2.626	2.604	1.436	1.66	1.804	1.778	1.954	1.87	2.191	2.152	up	up	up	up	up	up	up	up	up	up	up	up	up	up
P12844	myo-3	Myosin-3	-0.973	-0.975	-0.968	-0.919	-1.048	-0.948	-0.777	-1.102	-1.169	-1.054	-1.146	-0.949	-1.188	-1.116	down	down	down	down	down	down	down	down	down	down	down	down	down	down
O44448;Q9TZQ1	C02B10.6	Tyrosine-protein phosphatase	-3.332	-2.651	-2.435	-2.581	-2.364	-2.236	-2.936	-2.419	-3.406	-2.023	-2.916	-3.347	-2.938	-2.841	down	down	down	down	down	down	down	down	down	down	down	down	down	down
A5JYX9	eol-1	Decapping nuclease	1.947	2.229	1.927	1.799	2.775	1.81	-2.449	-1	-1.044	-0.609	0.043	0.705	0.938	1.139	up	up	up	up	up	up	down	down	down					up
O16291	CELE_F32D1.7	Uncharacterized protein	2.544	2.45	2.844	2.858	2.774	2.928	2.704	2.378	1.373	2.006	1.643	1.514	2.496	2.53	up	up	up	up	up	up	up	up	up	up	up	up	up	up
O45432	CELE_F32B6.4	Uncharacterized protein	-3.441	-3.171	-3.249	-2.967	-2.626	-2.945	-2.934	-4.093	-3.401	-3.686	-4.351	-3.219	-2.995	-3.79	down	down	down	down	down	down	down	down	down	down	down	down	down	down
O01600	CELE_T10E9.4	DX domain-containing protein	-4.7	-4.393	-4.034	-3.612	-3.592	-3.234	-3.289	-4.428	-4.367	-3.659	-4.393	-4.237	-4.284	-4.252	down	down	down	down	down	down	down	down	down	down	down	down	down	down
Q9XVI2	sys-1	SYmmetrical Sister cell hermaphrodite gonad defect	2.393	2.524	2.671	2.512	2.716	2.967	2.043	2.265	1.928	2.233	1.948	2.484	2.482	2.658	up	up	up	up	up	up	up	up	up	up	up	up	up	up
O17891	CELE_F55B11.2	Uncharacterized protein	1.231	1.54	1.675	1.943	2.016	1.365	-1.951	-1.194	-0.591	-0.055	0.539	0.271	1.116	1.368	up	up	up	up	up	up	down	down					up	up
G5EDG6	col-117	COLlagen structural	-4.42	-3.127	-4.354	-5.572	-4.543	-4.774	-5.967	-6.299	-5.63	-4.863	-5.398	-4.979	-3.54	-3.954	down	down	down	down	down	down	down	down	down	down	down	down	down	down
G5EDZ2	umps-1	Uridine 5'-monophosphate synthase	-1.087	-1.168	-0.93	-0.899	-0.953	-0.814	-0.593	-0.84	-1.027	-1.092	-1.083	-1.258	-1.195	-1.151	down	down	down	down	down	down	down	down	down	down	down	down	down	down
P27604	ahcy-1	Adenosylhomocysteinase	-3	-3.107	-2.842	-2.762	-2.945	-2.687	-0.754	-1.191	-1.626	-1.71	-2.272	-2.255	-2.79	-3	down	down	down	down	down	down	down	down	down	down	down	down	down	down
O02225	gln-6	Glutamine synthetase	1.536	1.724	1.782	2.007	1.903	2.098	1.69	1.69	1.441	1.108	1.686	1.347	2.004	1.948	up	up	up	up	up	up	up	up	up	up	up	up	up	up
Q18943	CELE_D1054.10	Uncharacterized protein	-0.033	-1.129	-0.284	0.015	-0.141	-0.35	-2.393	-1.416	-0.679	0.068	-0.864	-0.711	-0.056	0.144		down					down	down			down
Q03604	rnr-1	Ribonucleoside-diphosphate reductase large subunit	1.247	1.232	1.632	1.741	1.692	1.949	0.911	0.905	0.919	1.047	0.956	0.983	1.11	1.384	up	up	up	up	up	up	up	up	up	up	up	up	up	up
G5EFU2;G5EFW8	ant-1.4	ADP/ATP translocase	-2.646	-2.718	-2.535	-2.72	-2.508	-2.165	-1.364	-2.077	-2.519	-2.416	-2.78	-2.243	-2.906	-2.79	down	down	down	down	down	down	down	down	down	down	down	down	down	down
O17687	nasp-2	SHNi-TPR domain-containing protein	1.487	1.276	1.771	1.907	1.583	2.165	1.763	1.676	1.239	1.166	1.39	1.142	1.598	1.579	up	up	up	up	up	up	up	up	up	up	up	up	up	up
P52014	cyn-6	Peptidyl-prolyl cis-trans isomerase 6	-0.373	-0.273	-0.386	-0.317	-0.374	-0.425	-1.187	-1.141	-0.939	-1.119	-0.559	-0.747	-0.245	-0.475					down	down	down	down	down	down	down	down
Q65XX4	CELE_Y47G6A.15	Uncharacterized protein	-1.772	-1.813	-1.398	-1.161	-1.424	-1.047	-1.11	-1.665	-2.076	-2.101	-1.904	-2.036	-2.235	-2.064	down	down	down	down	down	down	down	down	down	down	down	down	down	down
Q93832	nlp-4	Neuropeptide-Like Protein	-2.721	-2.625	-1.537	-2.421	-1.841	-1.57	-2.816	-2.86	-3.114	-2.88	-3.346	-1.74	-2.343	-2.749	down	down	down	down	down	down	down	down	down	down	down	down	down	down
P34331	plk-1	Serine/threonine-protein kinase plk-1	1.065	0.953	1.314	1.433	1.292	1.279	0.842	0.814	0.938	0.995	1.101	0.896	1.078	1.267	up	up	up	up	up	up	up	up	up	up	up	up	up	up
O44466	test-1	Thyroglobulin type-1 domain-containing protein	-4.108	-3.935	-3.51	-3.817	-3.459	-3.94	-2.05	-3.2	-3.594	-3.411	-3.741	-3.762	-3.64	-3.852	down	down	down	down	down	down	down	down	down	down	down	down	down	down
Q20164	hsp-12.3	SHSP domain-containing protein	3.48	3.773	3.32	3.462	3.583	3.381	1.842	2.294	2.354	2.521	3.349	3.11	3.281	3.198	up	up	up	up	up	up	up	up	up	up	up	up	up	up
A7DTF5	CELE_Y56A3A.7	Uncharacterized protein	-1.169	-1.446	-1.232	-1.244	-1.286	-1.205	-0.865	-1.151	-1.36	-1.37	-1.357	-1.306	-1.272	-1.509	down	down	down	down	down	down	down	down	down	down	down	down	down	down
Q22235	enpl-1	Endoplasmin homolog	-1.338	-1.223	-1.068	-1.114	-1.15	-1.1	-0.603	-0.706	-0.957	-1.004	-0.952	-1.253	-1.033	-1.307	down	down	down	down	down	down	down	down	down	down	down	down	down	down
Q9U1Q4	glp-4	Valine--tRNA ligase	-1.089	-1.165	-1.187	-1.236	-1.166	-1.314	-0.557	-0.541	-0.675	-0.694	-0.964	-0.948	-1.09	-0.997	down	down	down	down	down	down	down	down	down	down	down	down	down	down
O17616	C29F3.7	CUB_2 domain-containing protein	-1.937	-1.545	-1.268	-1.04	-0.975	-0.637	-1.784	-1.436	-2.227	-1.703	-2.603	-2.094	-2.029	-1.916	down	down	down	down	down	down	down	down	down	down	down	down	down	down
Q17574	mtrr-1	Methionine synthase reductase	-2.285	-2.292	-1.986	-2.029	-2.011	-2.063	-0.627	-0.992	-1.483	-1.725	-1.894	-2.124	-2.413	-2.242	down	down	down	down	down	down	down	down	down	down	down	down	down	down
G5EC91	dpy-11	Thioredoxin domain-containing protein	-1.559	-1.486	-1.841	-1.865	-1.769	-1.706	-0.873	-1.351	-1.56	-1.341	-1.602	-1.648	-1.535	-1.66	down	down	down	down	down	down	down	down	down	down	down	down	down	down
Q09581	lec-3	32 kDa beta-galactoside-binding lectin lec-3	-1.208	-1.262	-1.703	-1.78	-1.573	-1.75	-0.924	-1.324	-1.239	-1.231	-1.199	-1.247	-1.259	-1.385	down	down	down	down	down	down	down	down	down	down	down	down	down	down
H2L0K5	CELE_T06A4.1	Peptidase_M14 domain-containing protein	-2.561	-3.783	-4.465	-4.325	-4.133	-4.253	-4.03	-4.484	-4.162	-4.442	-2.984	-3.659	-2.146	-3.364	down	down	down	down	down	down	down	down	down	down	down	down	down	down
Q23269	ceh-74	Homeobox domain-containing protein	4.668	5.405	5.587	5.714	5.075	5.859	3.078	3.653	4.528	4.783	4.621	4.91	4.789	4.94	up	up	up	up	up	up	up	up	up	up	up	up	up	up
P92199	let-502	Rho-associated protein kinase let-502	0.491	0.569	0.717	0.729	0.669	0.695	0.47	0.377	0.404	0.422	0.483	0.359	0.492	0.619	up	up	up	up	up	up	up	up	up	up	up	up	up	up
Q9XVI1	CELE_T23G11.1	Uncharacterized protein	-2.459	-2.273	-1.493	-1.992	-1.459	-1.585	-2.91	-2.033	-2.851	-2.371	-2.669	-1.299	-2.04	-2.689	down	down	down	down	down	down	down	down	down	down	down	down	down	down
Q18989	CELE_D2045.9	Uncharacterized protein	-0.656	-0.574	-0.065	-0.231	-0.057	-0.317	-0.943	-1.025	-1.08	-0.517	-0.863	-0.725	-0.525	-0.729	down	down					down	down	down	down	down	down	down	down
Q09321	F42A8.1	Uncharacterized protein F42A8.1	-1.699	-1.756	-1.169	-1.119	-0.955	-0.794	-1.045	-1.416	-1.862	-1.643	-1.817	-1.688	-1.763	-1.951	down	down	down	down	down	down	down	down	down	down	down	down	down	down
Q7KPV0	gsa-1	G protein, Subunit Alpha	-0.809	-0.601	-0.862	-0.67	-0.614	-0.481	-0.838	-0.998	-1.199	-0.931	-1.104	-0.737	-0.934	-1.04	down	down	down	down	down	down	down	down	down	down	down	down	down	down
O61931	ergo-1	Piwi-like protein ergo-1	0.331	0.121	0.539	0.61	0.422	0.648	1.057	0.921	0.447	0.636	0.147	0.466	0.377	0.301			up	up	up	up	up	up	up	up		up
Q19971	CELE_F32E10.5	Uncharacterized protein	2.351	1.985	2.552	2.296	2.644	2.119	1.881	1.843	2.203	1.849	2.029	2.272	1.667	2.694	up	up	up	up	up	up	up	up	up	up	up	up	up	up
Q9U348;Q9U349;Q9XUE9;Q9XVG3	col-93	Col_cuticle_N domain-containing protein	-8.35	-9.004	-9.568	-10.963	-10.177	-10.482	-3.007	-4.64	-5.277	-5.204	-7.648	-7.701	-8.854	-9.909	down	down	down	down	down	down	down	down	down	down	down	down	down	down
Q9XWT3	ule-5	Uterine Lumin Expressed/locailized	2.334	2.593	1.665	1.911	2.211	2.06	-1.963	-2.033	-0.577	0.478	1.521	1.614	1.956	2.089	up	up	up	up	up	up	down	down			up	up	up	up
O17070	CELE_F23F1.7	Uncharacterized protein	3.496	3.398	4.248	4.41	4.402	4.582	2.155	2.742	2.455	2.402	2.701	3.143	2.804	3.385	up	up	up	up	up	up	up	up	up	up	up	up	up	up
O01658	jmjc-1	Bifunctional lysine-specific demethylase and histidyl-hydroxylase NO66	-0.431	-0.401	-0.179	0.05	0.031	0.244	-0.989	-1.012	-1.062	-1.201	-1.07	-0.891	-0.638	-0.585							down	down	down	down	down	down	down	down
O45526	lsy-27	Zinc finger protein lsy-27	1.088	1.565	1.307	1.415	1.09	0.983	1.625	1.527	1.409	1.377	1.747	1.566	1.692	1.766	up	up	up	up	up	up	up	up	up	up	up	up	up	up
O01440	B0261.6	Uncharacterized protein	-4.822	-4.347	-3.81	-3.227	-3.203	-3.143	-2.819	-3.986	-4.283	-3.707	-4.151	-4.372	-3.584	-4.367	down	down	down	down	down	down	down	down	down	down	down	down	down	down
Q18140	C25A11.2	BTB domain-containing protein	1.665	1.654	1.818	1.902	1.855	1.724	1.021	1.178	1.352	1.621	1.655	1.297	1.73	1.832	up	up	up	up	up	up	up	up	up	up	up	up	up	up
P34647	mcm-6	DNA replication licensing factor mcm-6	1.126	0.839	1.521	1.541	1.441	1.849	1.216	1.109	0.997	0.952	0.93	0.783	1.102	1.126	up	up	up	up	up	up	up	up	up	up	up	up	up	up
G5EE80	SRP54	Signal recognition particle 54 kDa protein	-1.464	-1.523	-1.641	-1.587	-1.604	-1.56	-0.578	-0.927	-1.102	-1.171	-1.351	-1.435	-1.547	-1.38	down	down	down	down	down	down	down	down	down	down	down	down	down	down
Q20711	CELE_F53B3.6	Uncharacterized protein	-0.843	-1.04	-0.697	-0.436	-0.532	-0.351	-0.984	-1.18	-1.181	-1.169	-1.243	-1.172	-1.147	-1.17	down	down	down	down	down	down	down	down	down	down	down	down	down	down
Q20065	phy-2	Prolyl 4-hydroxylase subunit alpha-2	-2.254	-2.119	-2.3	-2.534	-2.377	-2.47	-0.966	-1.327	-1.636	-1.531	-1.962	-2.243	-2.177	-2.779	down	down	down	down	down	down	down	down	down	down	down	down	down	down
Q22203	CELE_T05A7.6	Uncharacterized protein	-2.527	-2.712	-2.133	-1.938	-1.971	-2.111	-3.216	-3.515	-2.968	-3.328	-3.152	-1.898	-3.342	-3.227	down	down	down	down	down	down	down	down	down	down	down	down	down	down
Q965M7	C17E7.9	Uncharacterized protein	2.066	1.958	2.133	2.197	2.391	2.433	1.893	1.368	1.391	1.319	1.535	1.315	1.986	2.113	up	up	up	up	up	up	up	up	up	up	up	up	up	up
Q19843	dhs-29	DeHydrogenases, Short chain	-3.289	-2.282	-2.492	-2.788	-2.473	-2.488	-2.242	-3.131	-3.014	-2.863	-3.28	-3.078	-2.83	-3.471	down	down	down	down	down	down	down	down	down	down	down	down	down	down
Q22966	clec-1	C-type lectin domain-containing protein	-0.43	-0.488	0.047	0.09	-0.148	0.309	1.197	0.941	1.131	0.814	0.256	0.532	-0.499	-0.572							up	up	up	up				down
G5EFD5	unc-71	Disintegrin and metalloproteinase domain-containing protein unc-71	2.899	2.734	3.062	3.022	3.004	2.956	1.509	1.353	1.938	1.775	2.135	2.212	2.822	2.957	up	up	up	up	up	up	up	up	up	up	up	up	up	up
Q19162	rpl-11.2	60S ribosomal protein L11-2	-1.786	-2.028	-2.236	-2.315	-2.245	-2.365	-0.809	-1.13	-1.551	-1.592	-1.776	-1.446	-2.09	-2.074	down	down	down	down	down	down	down	down	down	down	down	down	down	down
H2L045	tns-1	Tensin homolog	-0.443	-0.272	-0.497	-0.46	-0.436	-0.559	-0.63	-0.786	-0.548	-0.571	-0.401	-0.448	-0.537	-0.559	down		down	down	down	down	down	down	down	down	down	down	down	down
P91249	col-20	Col_cuticle_N domain-containing protein	-2.979	-2.744	-2.019	-2.401	-2.787	-2.613	-3.01	-4.49	-3.186	-4.642	-4.496	-3.071	-3.303	-2.955	down	down	down	down	down	down	down	down	down	down	down	down	down	down
Q9XVS3	clec-87	C-type lectin domain-containing protein 87	2.525	2.625	2.348	2.511	2.388	3.028	2.453	1.267	0.287	-0.384	1.017	0.882	2.515	2.074	up	up	up	up	up	up	up	up			up		up	up
Q86DC6	ifd-1	Intermediate filament protein ifd-1	-0.552	-0.252	-0.274	-0.069	-0.28	0.033	-0.817	-0.915	-0.924	-0.813	-0.722	-0.613	-0.582	-0.507	down				down		down	down	down	down	down	down	down	down
Q9XTY9	vha-20	Vacuolar H ATPase	-1.009	-1.356	-0.796	-0.978	-0.632	-0.571	-0.891	-1.008	-1.29	-1.525	-1.394	-1.451	-1.171	-1.397	down	down	down	down	down	down	down	down	down	down	down	down	down	down
Q9XUS8	tyr-2	TYRosinase	0	-0.384	0.101	0.348	0.648	0.384	-2.001	-2.883	-1.809	-1.908	-1.264	-1.181	-0.19	-0.733							down	down	down	down	down	down
Q17626	spch-1	SPerm CHromatin enriched	-7.034	-6.246	-6.063	-5.659	-6.161	-5.581	-2.952	-6.978	-5.839	-6.167	-6.77	-6.592	-6.73	-6.57	down	down	down	down	down	down	down	down	down	down	down	down	down	down
O44527	CELE_T08B6.4	Uncharacterized protein	-2.978	-2.642	-2.435	-2.226	-3.121	-2.782	-3.29	-3.458	-3.473	-3.189	-3.515	-3.729	-2.255	-2.9	down	down	down	down	down	down	down	down	down	down	down	down	down	down
P34560	rmd-1	Regulator of microtubule dynamics protein 1	0.878	0.439	0.31	0.828	0.579	0.549	1.502	1.543	1.227	0.966	1.153	0.778	0.668	0.962	up			up	up	up	up	up	up	up	up	up		up
Q4R139	CELE_T23B12.11	Uncharacterized protein	-0.232	-0.27	-0.674	-0.916	-0.505	-0.317	-2.712	-0.397	-0.768	-0.595	-0.693	-0.413	-0.321	-0.232							down
Q20291	fis-1	Mitochondrial fission 1 protein	-0.503	-1.262	-1.03	-1.003	-0.879	-0.735	-2.2	-1.365	-2.193	-1.715	-1.988	-1.169	-1.574	-1.629		down	down	down	down		down	down	down	down	down	down	down	down
Q23058	ssp-11	Sperm-specific class P protein 9/11	-5.774	-6.418	-5.694	-5.536	-5.262	-4.92	-3.117	-5.81	-5.908	-6.183	-7.151	-6.496	-5.394	-5.771	down	down	down	down	down	down	down	down	down	down	down	down	down	down
Q9XUR4	CELE_T05F1.2	Uncharacterized protein	0.903	1.027	1.111	1.387	1.242	1.182	1.103	1.306	1.338	1.656	1.392	1.11	1.282	1.505	up	up	up	up	up	up	up	up	up	up	up	up	up	up
Q17670	C05E7.2	Uncharacterized protein	-2.95	-2.452	-1.729	-2.215	-1.581	-1.844	-2.248	-3.116	-2.408	-2.294	-2.575	-2.189	-2.385	-2.413	down	down	down	down	down	down	down	down	down	down	down	down	down	down
Q17770	pdi-2	Protein disulfide-isomerase 2	-2.055	-1.974	-2.164	-2.199	-2.229	-2.08	-0.867	-1.147	-1.599	-1.671	-1.792	-1.735	-1.815	-2.278	down	down	down	down	down	down	down	down	down	down	down	down	down	down
G5EF99	CELE_ZK1128.7	SHSP domain-containing protein	-0.763	-0.837	-0.615	-0.407	-0.385	-0.336	-0.97	-1.424	-1.286	-1.196	-1.053	-0.902	-1.161	-0.952	down	down	down	down	down		down	down	down	down	down	down	down	down
Q10033	F15G9.1	Uncharacterized protein F15G9.1	-0.336	-0.342	0.032	-0.012	0.155	0.019	-0.708	-1.084	-0.961	-1.032	-0.7	-0.592	-0.474	-0.561							down	down	down	down	down	down	down	down
Q21902	mcm-5	DNA replication licensing factor mcm-5	1.008	0.938	1.173	1.23	1.118	1.427	1.012	0.909	0.768	0.956	0.763	0.634	0.948	0.972	up	up	up	up	up	up	up	up	up	up	up	up	up	up
Q21730	CELE_R04F11.3	DNA polymerase delta subunit 3	1.552	1.327	2.249	2.096	2.017	2.228	0.977	0.994	1.095	1.17	1.441	1.089	1.59	1.548	up	up	up	up	up	up	up	up	up	up	up	up	up	up
O45855	CELE_T27E7.1	Uncharacterized protein	-5.017	-4.46	-3.752	-3.809	-3.507	-2.578	-3.568	-4.723	-3.681	-3.332	-2.209	-3.065	-5.297	-4.367	down	down	down	down	down	down	down	down	down	down	down	down	down	down
Q9BL48	set-27	Protein-histidine N-methyltransferase	-1.789	-1.864	-1.572	-1.541	-1.531	-1.675	-0.979	-1.321	-1.39	-1.445	-1.631	-1.476	-1.886	-1.85	down	down	down	down	down	down	down	down	down	down	down	down	down	down
P91017	hpo-32	Uncharacterized protein	-0.931	-1.003	-0.531	-0.353	-0.182	-0.555	-1.132	-1.458	-1.165	-1.322	-1.316	-0.927	-1.017	-1.011	down	down	down			down	down	down	down	down	down	down	down	down
P34714	ost-1	SPARC	-2.344	-2.045	-2.599	-2.532	-2.14	-2.632	-1.471	-1.671	-1.995	-1.852	-1.902	-2.319	-2.122	-2.786	down	down	down	down	down	down	down	down	down	down	down	down	down	down
Q86NC2	nuo-2	NADH dehydrogenase [ubiquinone] iron-sulfur protein 3, mitochondrial	-0.99	-0.94	-1.176	-1.21	-1.145	-1.241	-0.55	-0.624	-0.81	-0.628	-0.675	-0.687	-1.029	-0.859	down	down	down	down	down	down	down	down	down	down	down	down	down	down
H2KZ48	C30F12.5	Uncharacterized protein	-0.27	-0.328	-0.125	0.038	0.009	0.184	-0.88	-0.879	-0.66	-0.495	-0.593	-0.531	-0.648	-0.639							down	down	down	down	down	down	down	down
Q9XXK1	atp-1	ATP synthase subunit alpha, mitochondrial	-1.322	-1.387	-1.496	-1.451	-1.697	-1.525	-0.674	-0.932	-1.029	-1.01	-1.041	-1.228	-1.363	-1.43	down	down	down	down	down	down	down	down	down	down	down	down	down	down
Q9XVP2	CELE_F36A2.12	Uncharacterized protein	-3.043	-2.447	-3.112	-2.958	-2.705	-2.225	-3.409	-3.829	-3.96	-3.662	-3.703	-3.068	-3.531	-3.916	down	down	down	down	down	down	down	down	down	down	down	down	down	down
P34446	pat-2	Integrin alpha pat-2	-0.666	-0.64	-0.523	-0.189	-0.462	-0.14	-0.786	-1.1	-1.019	-0.923	-0.859	-0.728	-0.835	-0.826	down	down	down		down		down	down	down	down	down	down	down	down
Q18793	C52G5.2	DUF1794 domain-containing protein	-0.986	-0.425	-0.826	-0.919	-0.803	-0.744	-1.05	-1.013	-0.87	-0.855	-0.798	-0.71	-0.792	-0.794	down		down	down	down	down	down	down	down	down	down	down	down	down
Q21000	myo-5	MYOsin heavy chain structural genes	-0.722	-0.468	-0.412	-0.359	-0.468	-0.259	-0.768	-1.01	-1.05	-0.966	-0.958	-0.694	-0.815	-0.791	down	down	down	down	down		down	down	down	down	down	down	down	down
Q9N588	tyms-1	Thymidylate synthase	1.522	1.213	1.767	1.909	1.618	1.807	1.117	1.209	1.299	1.553	1.583	1.337	1.608	1.898	up	up	up	up	up	up	up	up	up	up	up	up	up	up
Q9UAV3	ubh-1	Ubiquitin carboxyl-terminal hydrolase	-0.996	-0.922	-1.234	-0.901	-0.872	-0.719	-1.232	-1.285	-1.28	-0.92	-1.197	-1.003	-1.085	-0.879	down	down	down	down	down	down	down	down	down	down	down	down	down	down
Q9NA78	txdc-12.1	Thioredoxin domain-containing protein	-3.701	-4.078	-4.073	-4.186	-4.057	-3.925	-1.473	-1.953	-2.348	-2.772	-2.68	-3.807	-3.17	-4.161	down	down	down	down	down	down	down	down	down	down	down	down	down	down
Q20762	F54D1.6	Uncharacterized protein F54D1.6	-0.066	0.028	0.544	0.539	0.789	0.639	-0.871	-0.935	-0.959	-0.788	-0.64	-0.436	-0.335	-0.238			up	up	up	up	down	down	down	down	down	down
Q9NAM4	CELE_Y105C5B.17	Uncharacterized protein	-1.646	-1.388	-1.25	-1.301	-1.658	-1.447	-2.085	-2.151	-2.311	-0.898	-1.967	-1.881	-2.122	-1.67	down	down	down	down	down	down	down	down	down		down	down	down	down
Q17902	egal-1	Egalitarian protein homolog	-1.057	-1.034	-1.242	-1.392	-1.202	-1.317	-0.66	-0.715	-0.815	-0.979	-0.911	-1.048	-0.967	-1.203	down	down	down	down	down	down	down	down	down	down	down	down	down	down
P52009	cyn-1	Peptidyl-prolyl cis-trans isomerase 1	-1.328	-1.446	-1.812	-1.767	-1.821	-1.763	-0.83	-1.148	-1.158	-1.247	-1.238	-1.239	-1.352	-1.44	down	down	down	down	down	down	down	down	down	down	down	down	down	down
Q9BL34	cox-6b	Cytochrome OXidase assembly protein	-0.916	-0.953	-1.129	-1.018	-1.167	-1.139	-0.685	-0.65	-0.58	-0.595	-0.783	-0.66	-0.903	-1.007	down	down	down	down	down	down	down	down	down	down	down	down	down	down
O76447	hcp-1	HoloCentric chromosome binding Protein	0.753	0.669	0.917	0.977	0.846	0.851	0.724	0.687	0.791	0.767	0.882	0.571	0.886	0.986	up	up	up	up	up	up	up	up	up	up	up	up	up	up
O45951	CELE_Y48E1B.8	Nucleotid_trans domain-containing protein	-3.685	-3.631	-3.345	-3.161	-3.034	-3.313	-1.854	-1.676	-2.707	-1.953	-3.541	-3.158	-3.693	-3.507	down	down	down	down	down	down	down	down	down	down	down	down	down	down
P91147;P91179	C43E11.5	Tyrosine-protein phosphatase domain-containing protein	-3.001	-1.591	-1.779	-1.947	-2.007	-2.111	-2.255	-3.554	-3.71	-3.607	-2.512	-2.845	-2.733	-1.769	down	down	down	down	down	down	down	down	down	down	down	down	down	down
Q19371	sec-24.1	Yeast SEC homolog	-0.926	-0.913	-0.996	-1.08	-1.026	-0.947	-0.476	-0.531	-0.693	-0.701	-0.783	-0.852	-0.758	-0.914	down	down	down	down	down	down	down	down	down	down	down	down	down	down
G5EDP9	aap-1	Phosphoinositide 3-kinase adapter subunit	0.753	0.903	0.816	0.921	1.01	0.913	0.833	0.866	0.924	1.232	0.938	0.884	0.974	1.07	up	up	up	up	up	up	up	up	up	up	up	up	up	up
Q20234	CELE_F40F9.3	Uncharacterized protein	-2.927	-1.656	-2.903	-2.21	-2.498	-2.017	-3.262	-3.448	-3.486	-3.561	-4.47	-1.669	-2.709	-3.255	down	down	down	down	down	down	down	down	down	down	down	down	down	down
Q22620	pars-1	Proline--tRNA ligase	-0.891	-0.984	-0.768	-0.73	-0.748	-0.641	-0.487	-0.754	-0.815	-0.75	-0.985	-0.962	-0.995	-0.921	down	down	down	down	down	down	down	down	down	down	down	down	down	down
Q9UAQ6	rab-1	RAB family	-1.271	-1.25	-1.062	-1.102	-1.043	-0.98	-0.762	-1.029	-1.286	-1.517	-1.306	-1.391	-1.469	-1.396	down	down	down	down	down	down	down	down	down	down	down	down	down	down
Q23044	CELE_T22B7.7	HotDog ACOT-type domain-containing protein	1.005	1.499	0.401	-0.476	0.349	0.58	-2.394	0.941	1.286	1.587	1.211	1.488	0.812	0.682		up					down		up	up	up	up
P04970;P17331	gpd-1	Glyceraldehyde-3-phosphate dehydrogenase 1;Glyceraldehyde-3-phosphate dehydrogenase 4	0.312	0.091	0.397	0.457	0.379	0.473	0.676	0.492	0.311	0.543	0.298	0.326	0.116	0.389			up	up	up	up	up	up	up	up	up	up		up
Q95XQ8	mcm-4	DNA replication licensing factor mcm-4	0.878	0.655	1.24	1.257	1.152	1.47	1.047	0.869	0.538	0.476	0.589	0.468	0.814	0.813	up	up	up	up	up	up	up	up	up		up		up	up
Q9U1V9	dnj-29	J domain-containing protein	-0.761	-0.929	-0.87	-0.857	-0.775	-0.723	-0.508	-0.647	-0.805	-0.801	-0.928	-1.013	-0.899	-0.944	down	down	down	down	down	down	down	down	down	down	down	down	down	down
Q86NG3	clec-88	C-type lectin domain-containing protein 88	2.705	2.717	3.12	3.276	3.374	3.438	1.845	1.473	1.197	0.849	1.966	1.459	2.588	2.567	up	up	up	up	up	up	up	up	up		up	up	up	up
Q20921;Q20922	col-160	Col_cuticle_N domain-containing protein	-8.802	-8.308	-8.444	-8.917	-8.716	-8.56	-3.096	-4.675	-5.359	-5.335	-6.494	-7.998	-9.844	-9.117	down	down	down	down	down	down	down	down	down	down	down	down	down	down
Q867X0	parg-1	Poly(ADP-ribose) glycohydrolase 1	0.883	1.044	1.162	0.985	1.027	1.014	0.795	0.898	0.877	0.903	0.879	0.8	0.934	1.203	up	up	up	up	up	up	up	up	up	up	up	up	up	up
Q17568	C01G5.5	Aldo_ket_red domain-containing protein	1.489	1.573	1.882	1.897	1.844	1.913	0.553	0.719	0.922	1.255	1.353	1.144	1.44	1.558	up	up	up	up	up	up	up	up	up	up	up	up	up	up
O45952	csc-1	Chromosome segregation and cytokinesis defective protein 1	1.008	0.749	0.967	1	0.918	1.011	0.767	0.933	0.954	1.163	0.827	0.678	0.877	1.065	up	up	up	up	up	up	up	up	up	up	up	up	up	up
G5EFP5	fut-3	Alpha-(1,3)-fucosyltransferase fut-3	1.263	1.28	1.458	1.461	1.444	1.273	0.769	1.087	1.511	1.541	1.565	1.494	1.487	1.63	up	up	up	up	up	up	up	up	up	up	up	up	up	up
C2BR91	C39B5.5	Cystatin	-7.702	-6.801	-7.065	-6.847	-7.129	-6.618	-2.351	-3.679	-4.491	-5.258	-4.987	-6.848	-6.019	-8.132	down	down	down	down	down	down	down	down	down	down	down	down	down	down
Q19713	fars-3	Phenylalanine--tRNA ligase beta subunit	-1.203	-1.405	-0.884	-0.956	-0.951	-0.983	-0.524	-0.779	-0.906	-0.661	-1.203	-1.067	-1.267	-1.071	down	down	down	down	down	down	down	down	down	down	down	down	down	down
G5EFC8	dap-3	Mammalian cell Death Associated Protein related	-1.278	-1.432	-1.121	-1.048	-1.107	-1.162	-0.572	-0.909	-1.056	-0.952	-1.213	-1.283	-1.395	-1.426	down	down	down	down	down	down	down	down	down	down	down	down	down	down
Q9XWE1	dnj-27	DnaJ homolog subfamily C member 10	-0.648	-0.708	-0.531	-0.719	-0.493	-0.61	-0.755	-0.761	-0.849	-0.706	-1.04	-1.054	-0.659	-0.918	down	down	down	down	down	down	down	down	down	down	down	down	down	down
Q23061	CELE_T28H11.7	Uncharacterized protein	-2.136	-2.117	-1.48	-1.512	-0.9	-0.737	-2.53	-2.172	-1.126	-1.964	-1.818	-1.866	-2.019	-2.597	down	down	down	down			down	down		down	down	down	down	down
Q9N3Z3	chk-1	Serine/threonine-protein kinase chk-1	0.699	0.556	0.962	1.026	0.933	0.857	0.829	0.767	0.705	0.588	0.772	0.376	0.775	0.868	up	up	up	up	up	up	up	up	up	up	up		up	up
Q20363	sip-1	Stress-induced protein 1	2.472	2.454	3.433	3.617	3.495	3.296	1.167	1.445	1.893	2.445	2.163	2.275	2.102	2.674	up	up	up	up	up	up	up	up	up	up	up	up	up	up
Q19253	toca-1	Transducer of Cdc42-dependent actin assembly protein 1 homolog	-0.012	-0.039	0.233	0.299	0.076	0.154	-0.7	-0.849	-0.624	-0.339	-0.405	-0.244	-0.114	-0.129				up			down	down	down		down
Q22192	ttr-14	TransThyretin-Related family domain	-1.408	-0.912	-0.866	-0.689	-0.676	-0.394	-1.14	-1.551	-1.883	-1.615	-1.392	-1.405	-1.385	-1.336	down	down	down	down	down		down	down	down	down	down	down	down	down
Q9N416	CELE_Y39A3CL.3	Uncharacterized protein	-6.572	-6.693	-6.19	-5.98	-6.255	-6.255	-3.916	-4.847	-5.533	-5.564	-7.195	-6.915	-5.428	-6.892	down	down	down	down	down	down	down	down	down	down	down	down	down	down
Q09348	T05H10.4	Uncharacterized protein T05H10.4	1.692	1.656	2.057	1.857	1.944	2.19	1.758	1.228	1.062	1.168	1.138	1.144	2.124	1.678	up	up	up	up	up	up	up	up	up	up	up	up	up	up
Q09936	C53C9.2	Uncharacterized protein C53C9.2	-1.557	-1.262	-1.317	-1.191	-1.503	-1.179	-0.903	-1.299	-1.339	-1.592	-1.395	-1.32	-1.53	-1.528	down	down	down	down	down	down	down	down	down	down	down	down	down	down
Q9XV52	gfm-1	Elongation factor G, mitochondrial	-1.378	-1.372	-1.349	-1.475	-1.403	-1.551	-0.589	-0.854	-0.943	-1.066	-1.162	-1.153	-1.418	-1.284	down	down	down	down	down	down	down	down	down	down	down	down	down	down
Q20821	rskd-1	PX domain-containing protein	-0.512	-2.273	0.404	0.032	0.412	0.488	-2.915	-0.422	-1.179	-2.988	-1.093	-1.123	-0.672	-0.367		down					down			down
Q18678	sars-1	Probable serine--tRNA ligase, cytoplasmic	-0.818	-0.945	-0.706	-0.648	-0.643	-0.693	-0.493	-0.662	-0.702	-0.745	-0.889	-0.866	-0.933	-0.896	down	down	down	down	down	down	down	down	down	down	down	down	down	down
Q22230	decr-1.3	Probable 2,4-dienoyl-CoA reductase 3 [(3E)-enoyl-CoA-producing]	-3.067	-3.439	-3.309	-2.838	-2.859	-3.082	-3.804	-3.171	-1.866	-2.853	-3.425	-3.306	-3.385	-3.137	down	down	down	down	down	down	down	down	down	down	down	down	down	down
O17352	aagr-4	Gal_mutarotas_2 domain-containing protein	-3.641	-3.949	-3.227	-3.222	-3.244	-3.142	-1.069	-1.491	-1.886	-1.918	-2.815	-3.505	-3.408	-4.018	down	down	down	down	down	down	down	down	down	down	down	down	down	down
A0A5E4LWV7	lfi-1	Lin-5 (Five) Interacting protein	1.837	1.969	1.885	2.253	2.003	2.313	0.761	0.947	1.102	1.118	1.384	1.556	1.607	1.739	up	up	up	up	up	up	up	up	up	up	up	up	up	up
G5EBY3	nmy-2	Non-muscle MYosin	1.094	1.082	1.322	1.423	1.37	1.261	0.528	0.689	0.912	0.977	1.006	0.895	1.012	1.157	up	up	up	up	up	up	up	up	up	up	up	up	up	up
Q21926	iars-1	Isoleucine--tRNA ligase, cytoplasmic	-0.548	-0.631	-0.581	-0.584	-0.572	-0.585	-0.427	-0.545	-0.479	-0.517	-0.6	-0.586	-0.648	-0.586	down	down	down	down	down	down	down	down	down	down	down	down	down	down
P34329	C14B9.2	Probable protein disulfide-isomerase A4	-1.7	-1.607	-1.451	-1.219	-1.323	-1.189	-0.947	-1.148	-1.399	-1.299	-1.228	-1.424	-1.137	-1.894	down	down	down	down	down	down	down	down	down	down	down	down	down	down
Q18801	bre-1	GDP-mannose 4,6 dehydratase 1	-1.956	-1.76	-2.042	-2.045	-2.075	-2.065	-0.907	-1.183	-1.579	-1.732	-1.653	-1.936	-1.966	-1.983	down	down	down	down	down	down	down	down	down	down	down	down	down	down
Q9TZ63	CELE_F56F11.2	Uncharacterized protein	-1.659	-1.964	-0.973	-1.266	-1.316	-1.252	-1.926	-1.546	-1.697	-1.365	-2.854	-1.421	-1.617	-1.356	down	down	down	down	down	down	down	down	down	down	down	down	down	down
G5EEK5	vet-6	Very Early Transcript	2.307	2.72	2.764	2.767	2.48	2.115	3.322	2.725	3.288	3.605	2.074	2.398	1.519	2.698	up	up	up	up	up	up	up	up	up	up	up	up		up
O17004	mrps-2	Mitochondrial Ribosomal Protein, Small	-0.932	-1.018	-1.43	-1.355	-1.43	-1.608	-0.545	-0.575	-0.686	-0.575	-0.874	-0.815	-0.975	-0.916	down	down	down	down	down	down	down	down	down	down	down	down	down	down
P34642	ZK512.4	Signal recognition particle 9 kDa protein	-4.37	-4.781	-4.405	-4.647	-4.397	-4.617	-2.675	-3.734	-4.388	-3.999	-4.533	-4.893	-5.379	-4.838	down	down	down	down	down	down	down	down	down	down	down	down	down	down
Q20306	abcf-3	ABC transporter, class F	-0.801	-0.968	-0.772	-0.717	-0.683	-0.69	-0.448	-0.579	-0.768	-0.722	-0.885	-0.959	-0.991	-0.855	down	down	down	down	down	down	down	down	down	down	down	down	down	down
P12845	myo-2	Myosin-2	-1.12	-0.919	-0.945	-0.777	-0.925	-0.671	-0.847	-1.23	-1.283	-1.284	-1.29	-1.028	-1.168	-1.11	down	down	down	down	down	down	down	down	down	down	down	down	down	down
P42170	rnr-2	Ribonucleoside-diphosphate reductase small chain	0.89	0.974	1.407	1.358	1.178	1.47	1.422	0.764	0.144	0.21	0.331	0.322	1.116	0.843	up	up	up	up	up	up	up	up					up	up
Q19663	CELE_F21C10.7	Uncharacterized protein	-0.536	-0.418	-0.346	-0.234	-0.34	-0.251	-0.62	-0.849	-0.793	-0.768	-0.739	-0.599	-0.689	-0.643	down	down	down		down	down	down	down	down	down	down	down	down	down
Q21633	ubc-18	Ubiquitin-conjugating enzyme E2 ubc-18	0.49	0.48	0.723	0.658	0.866	0.708	0.819	0.786	0.593	0.835	0.624	0.633	0.733	0.846	up	up	up	up	up	up	up	up	up	up	up	up	up	up
P48158	rpl-23	60S ribosomal protein L23	-2.273	-2.533	-2.291	-2.096	-2.194	-2.011	-1.025	-1.778	-1.652	-1.965	-2.269	-2.354	-2.378	-2.2	down	down	down	down	down	down	down	down	down	down	down	down	down	down
G5EGA7	ras-2	GTP binding protein	-0.792	-0.823	-0.954	-1.21	-0.958	-1.18	-0.94	-1.154	-1.106	-0.996	-0.882	-0.589	-1.129	-1.266	down	down	down	down	down	down	down	down	down	down	down	down	down	down
A0A0K3AUI7	picd-1	Pry-1 Interacting and CABIN1 Domain containing	1.618	1.65	1.522	1.829	1.269	1.782	1.815	1.663	1.523	1.429	1.735	1.807	1.924	1.804	up	up	up	up	up	up	up	up	up	up	up	up	up	up
Q19165	flp-6	FMRFamide-like neuropeptides 6	3.754	3.626	3.531	2.228	2.614	1.49	2.869	2.969	2.753	2.831	3.485	3.398	4.017	3.801	up	up	up	up	up	up	up	up	up	up	up	up	up	up
Q9GZH4	ribo-1	Dolichyl-diphosphooligosaccharide--protein glycosyltransferase subunit 1	-1.01	-0.984	-0.732	-0.649	-0.671	-0.563	-0.525	-0.738	-0.935	-0.914	-0.982	-0.89	-1.024	-1.024	down	down	down	down	down	down	down	down	down	down	down	down	down	down
Q9U2F4	CELE_Y46G5A.14	Uncharacterized protein	-3.03	-2.267	-1.619	-1.516	-1.178	-0.987	-2.322	-1.746	-2.557	-2.183	-2.14	-1.669	-2.388	-2.139	down	down	down	down	down	down	down	down	down	down	down	down	down	down
Q9XUJ5	CELE_W09D6.4	Uncharacterized protein	-2.142	-1.684	-1.533	-0.883	-1.324	-1.034	-2.507	-2.101	-2.218	-1.344	-1.9	-1.734	-2.209	-1.812	down	down	down		down	down	down	down	down		down	down	down	down
O17859	CELE_F32H2.7	Uncharacterized protein	-2.78	-2.587	-1.256	-1.296	-1.274	-1.387	-3.329	-2.718	-2.19	-2.083	-1.701	-2.678	-1.93	-2.015	down	down				down	down	down	down	down	down	down	down	down
G5EBV6	pgl-3	Guanyl-specific ribonuclease pgl-3	0.803	0.7	0.314	0.437	0.261	0.225	0.759	0.879	0.827	1.013	1.054	0.691	0.607	1.012	up	up		up			up	up	up	up	up	up	up	up
C0Z3L6	CELE_Y54G11A.17	Uncharacterized protein	-1.141	-1.411	-1.321	-1.344	-1.219	-1.368	-0.867	-0.8	-1.044	-0.622	-1.263	-1.085	-1.291	-1.087	down	down	down	down	down	down	down	down	down	down	down	down	down	down
Q09507	C45G9.9	Uncharacterized protein C45G9.9	-3.388	-3.385	-2.92	-2.48	-2.423	-2.856	-2.591	-3.927	-3.111	-2.682	-4.185	-3.881	-3.467	-3.382	down	down	down	down	down	down	down	down	down	down	down	down	down	down
P0A6T5	folE	GTP cyclohydrolase 1	-1.374	-0.92	-1.074	-0.462	-0.992	-0.431	-1.198	-1.618	-1.451	-1.451	-1.305	-1.508	-1.232	-1.53	down	down	down		down		down	down	down	down	down	down	down	down
P27420	hsp-3	Heat shock 70 kDa protein C	-1.268	-1.231	-1.133	-1.222	-1.199	-1.195	-0.611	-0.702	-1.097	-0.909	-1.129	-1.049	-1.257	-1.276	down	down	down	down	down	down	down	down	down	down	down	down	down	down
Q21776	bub-1	Mitotic checkpoint serine/threonine-protein kinase bub-1	0.916	0.685	1.41	1.33	1.327	1.227	0.693	0.658	0.82	0.884	0.96	0.694	0.927	1.019	up	up	up	up	up	up	up	up	up	up	up	up	up	up
Q17974	mma-1	Uncharacterized protein	-1.076	-1.134	-1.267	-1.131	-1.086	-1.24	-0.466	-0.619	-0.634	-0.609	-0.824	-0.756	-1.119	-0.956	down	down	down	down	down	down	down	down	down	down	down	down	down	down
G5ED07	pdi-3	Protein disulfide-isomerase	-0.74	-0.775	-0.571	-0.516	-0.618	-0.692	-0.581	-0.636	-0.682	-0.576	-0.598	-0.831	-0.672	-0.782	down	down	down	down	down	down	down	down	down	down	down	down	down	down
P51559	bli-4	Endoprotease bli-4	-0.436	-0.134	-0.226	-0.266	-0.017	-0.218	-0.604	-0.669	-0.692	-0.733	-0.554	-0.696	-0.365	-0.338	down			down			down	down	down	down	down	down	down	down
O01683	hmg-3	FACT complex subunit ssrp1-B	1.011	0.874	1.266	1.208	1.087	1.106	0.759	0.904	1.161	1.236	1.175	0.862	1.158	1.298	up	up	up	up	up	up	up	up	up	up	up	up	up	up
Q9U3K5	inx-2	Innexin-2	1.971	2.002	2.252	2.268	2.12	2.248	1.394	1.756	1.195	1.912	1.898	1.497	2.235	2.088	up	up	up	up	up	up	up	up	up	up	up	up	up	up
Q9N3D0	sec-11	Signal peptidase complex catalytic subunit SEC11	-1.562	-1.494	-1.332	-1.369	-1.385	-1.065	-1.094	-1.566	-1.313	-1.377	-1.321	-1.388	-1.331	-1.546	down	down	down	down	down	down	down	down	down	down	down	down	down	down
A3QM98	col-138	Col_cuticle_N domain-containing protein	-1.893	-1.76	-0.978	-1.024	-1.123	-1.003	-1.014	-1.614	-1.108	-1.793	-1.33	-1.46	-1.604	-1.328	down	down	down	down	down	down	down	down	down	down	down	down	down	down
Q21193	pfn-3	Profilin-3	-1.387	-2.054	-2.555	-2.518	-2.627	-2.557	-1.532	-1.94	-2.02	-1.792	-2.121	-1.831	-1.779	-1.744	down	down	down	down	down	down	down	down	down	down	down	down	down	down
P34713	pgp-3	Multidrug resistance protein pgp-3	-0.576	-0.277	-0.508	-0.328	-0.464	-0.301	-0.854	-0.89	-1.027	-0.704	-0.833	-0.509	-0.537	-0.763	down		down		down		down	down	down	down	down	down	down	down
G5EG39	skr-10	Skp1-related protein	-1.157	-0.633	-0.043	0.292	-0.007	0.326	2.576	1.559	-1.115	-0.991	-1.2	-0.605	-1.23	-0.231							up	up			down
Q9BKU4	phb-1	Mitochondrial prohibitin complex protein 1	-0.431	-0.534	-0.634	-0.67	-0.698	-0.711	-0.526	-0.695	-0.788	-0.604	-0.648	-0.517	-0.687	-0.513	down	down	down	down	down	down	down	down	down	down	down	down	down	down
G5ECQ5	pes-2.1	F-box domain-containing protein	0.645	1.129	0.286	0.429	0.211	0.93	2.554	1.678	0.892	1.029	1.054	1.593	1.049	1.258							up	up				up
P90731	acly-2	ATP-citrate synthase	0.515	0.52	0.679	0.794	0.67	0.705	0.552	0.681	0.678	0.757	0.665	0.589	0.641	0.671	up	up	up	up	up	up	up	up	up	up	up	up	up	up
Q9N585	ppw-2	Piwi-like protein	-1.016	-1.172	-1.23	-1.054	-1.136	-0.926	-0.787	-1.208	-1.192	-1.352	-1.046	-0.988	-1.269	-1.108	down	down	down	down	down	down	down	down	down	down	down	down	down	down
Q9XVR7	mcm-3	DNA replication licensing factor MCM3	1.129	1.063	1.495	1.451	1.37	1.649	0.919	0.993	0.841	0.846	0.814	0.885	1.156	1.175	up	up	up	up	up	up	up	up	up	up	up	up	up	up
Q21910	CELE_R10E9.2	Uncharacterized protein	-4.879	-3.61	-4.243	-3.616	-4.118	-3.599	-2.94	-5.375	-4.479	-4.285	-5.396	-3.498	-4.607	-4.802	down	down	down	down	down	down	down	down	down	down	down	down	down	down
Q21544	pycr-1	Pyrroline-5-carboxylate reductase	-2.09	-1.671	-2.369	-2.778	-2.778	-2.719	-1.204	-1.119	-1.193	-1.115	-1.132	-1.525	-1.615	-1.651	down	down	down	down	down	down	down	down	down	down	down	down	down	down
Q09221	cpna-2	Copine family protein 2	-0.724	-0.499	-0.473	-0.382	-0.417	-0.418	-0.602	-0.779	-0.807	-0.716	-0.79	-0.574	-0.72	-0.686	down	down	down	down	down	down	down	down	down	down	down	down	down	down
Q4W503	mzt-1	Mitotic spindle organiZing protein (MOZART) homolog	0.483	0.433	0.635	0.628	0.418	0.499	0.714	0.684	0.74	0.753	0.658	0.428	0.662	0.508	up	up	up	up	up	up	up	up	up	up	up	up	up	up
Q10918	B0252.5	Uncharacterized protein B0252.5	-4.663	-3.733	-3.784	-3.563	-3.703	-3.078	-3.014	-4.202	-4.618	-3.233	-4.47	-4.608	-3.567	-4.291	down	down	down	down	down	down	down	down	down	down	down	down	down	down
P91409	syx-4	Putative syntaxin-4	0.218	0.374	0.193	0.339	0.227	0.133	0.783	0.843	0.714	0.671	0.622	0.454	0.436	0.579				up			up	up	up	up	up	up	up	up
O18131	CELE_T26E3.4	RWD domain-containing protein	-2.24	-1.797	-2.093	-2.255	-2.143	-2.36	-1.128	-1.635	-1.633	-1.632	-1.668	-1.597	-1.796	-1.912	down	down	down	down	down	down	down	down	down	down	down	down	down	down
Q20228	rps-9	40S ribosomal protein S9	-1.417	-1.407	-1.281	-1.297	-1.289	-1.295	-0.545	-0.756	-1.025	-0.821	-1.223	-1.262	-1.554	-1.187	down	down	down	down	down	down	down	down	down	down	down	down	down	down
G5EDE7	tpxl-1	TPX2 (Targeting Protein for Xenopus Klp2)-Like	1.451	1.124	1.522	1.55	1.288	1.613	1.144	0.926	0.939	0.779	1.251	0.625	1.254	1.332	up	up	up	up	up	up	up	up	up	up	up	up	up	up
Q6BER6	mdt-21	Mediator of RNA polymerase II transcription subunit 21	-3.794	-4.667	-4.56	-4.21	-4.188	-3.528	-3.844	-2.419	-5.4	-4.903	-6.38	-3.916	-4.023	-4.873	down	down	down	down	down	down	down	down	down	down	down	down	down	down
G5EFD4	hmt-1	Heavy metal tolerance factor 1	-0.753	-0.843	-0.895	-0.8	-0.738	-0.726	-0.657	-0.582	-0.661	-0.59	-0.796	-0.765	-0.883	-0.747	down	down	down	down	down	down	down	down	down	down	down	down	down	down
Q22289	tbx-9	T-box transcription factor tbx-9	-0.532	1.281	1.419	0.8	1.041	0.778	2.402	1.869	1.9	0.418	1.856	1.382	1.117	0.06			up		up		up	up	up		up	up
Q2L6V7	CELE_T20D4.10	DUF19 domain-containing protein	-1.215	0.244	-2.037	-1.666	-1.836	-1.627	-2.494	-2.891	-1.849	-2.822	-2.717	-2.248	-1.197	-2.27			down	down	down	down	down	down	down	down	down	down		down
Q9XXI9	mcm-2	DNA replication licensing factor MCM2	0.86	0.677	0.98	1.054	0.881	1.264	1.021	0.913	0.534	0.498	0.593	0.346	0.825	0.756	up	up	up	up	up	up	up	up	up		up		up	up
Q9XUY5	nkb-3	Probable sodium/potassium-transporting ATPase subunit beta-3	-1.281	-1.082	-1.088	-1.158	-1.087	-1.056	-0.889	-1.23	-1.133	-0.846	-1.225	-0.889	-1.393	-1.221	down	down	down	down	down	down	down	down	down	down	down	down	down	down
Q9U3Q0	mrps-22	Mitochondrial Ribosomal Protein, Small	-0.816	-1.044	-1.299	-1.254	-1.292	-1.395	-0.491	-0.537	-0.537	-0.517	-0.706	-0.801	-1.033	-1.003	down	down	down	down	down	down	down	down	down	down	down	down	down	down
U4PBZ1	CELE_Y76B12C.6	Uncharacterized protein	0.554	0.308	0.693	0.65	0.473	0.542	0.797	0.328	0.246	0.645	0.446	0.226	0.443	0.423	up		up	up	up	up	up			up	up		up
P06136	ftsQ	Cell division protein FtsQ	2.841	2.815	0.296	0.776	0.12	-0.112	4.329	3.798	3.643	2.309	3.379	2.582	3.217	3.175	up	up					up	up	up		up	up	up	up
Q18486	coq-8	Atypical kinase coq-8, mitochondrial	-0.887	-0.839	-1.031	-1.022	-1.061	-1.095	-0.556	-0.735	-0.608	-0.628	-1.007	-0.692	-0.996	-0.977	down	down	down	down	down	down	down	down	down	down	down	down	down	down
Q9XVU3	atgp-1	Alpha-glucosidase	-0.281	-0.266	-0.461	-0.353	-0.382	-0.12	-0.765	-0.821	-0.539	-0.49	-0.387	-0.239	-0.259	-0.47			down	down	down		down	down	down	down	down			down
A0A0K3ASH9	CELE_Y50D4B.4	Uncharacterized protein	-0.565	-0.251	-0.471	-0.473	-0.707	-0.376	1.111	0.943	0.659	0.441	0.091	-0.046	-0.095	-0.254				down	down		up	up	up
Q09294	EEED8.3	Uncharacterized protein EEED8.3	0.273	0.593	0.808	1.036	0.895	0.655	1.629	0.767	0.487	0.732	0.748	0.922	0.945	1.044			up	up	up		up					up	up	up
Q18823	lam-2	Laminin-like protein lam-2	-0.27	-0.257	-0.226	-0.092	-0.143	0.033	-0.659	-0.81	-0.924	-0.937	-0.814	-0.68	-0.662	-0.522							down	down	down	down	down	down	down	down
Q93795	hpo-31	Uncharacterized protein	-0.603	-0.631	-0.25	-0.185	-0.144	-0.069	-0.575	-0.77	-0.871	-0.81	-0.91	-0.765	-0.859	-0.832	down	down					down	down	down	down	down	down	down	down
Q9XTR0	CELE_H06A10.1	DM13 domain-containing protein	-3.947	-3.343	-2.691	-2.627	-2.409	-2.532	-2.318	-3.258	-2.898	-3.18	-3.505	-3.084	-2.619	-3.401	down	down	down	down	down	down	down	down	down	down	down	down	down	down
Q9BL46	CELE_Y71H2AM.11	M20_dimer domain-containing protein	-0.935	-0.701	-0.776	-0.833	-0.797	-0.838	-0.659	-0.824	-0.858	-0.8	-0.921	-0.743	-0.851	-0.938	down	down	down	down	down	down	down	down	down	down	down	down	down	down
P34384	mrpl-44	Ribosomal protein L44, mitochondrial	-1.842	-1.915	-1.612	-1.508	-1.561	-1.514	-0.645	-1.143	-1.63	-1.553	-1.655	-1.66	-2.095	-1.794	down	down	down	down	down	down	down	down	down	down	down	down	down	down
Q09580	gmps-1	Probable GMP synthase [glutamine-hydrolyzing]	-0.79	-0.884	-0.71	-0.656	-0.71	-0.585	-0.419	-0.551	-0.777	-0.789	-0.856	-0.864	-0.822	-0.862	down	down	down	down	down	down	down	down	down	down	down	down	down	down
O44565	lam-1	LAMinin related. See also lmb	-0.459	-0.467	-0.446	-0.264	-0.282	-0.046	-0.789	-0.961	-1.064	-1.224	-0.966	-0.969	-0.785	-0.834	down	down	down				down	down	down	down	down	down	down	down
G5ED95	yars-1	Tyrosine--tRNA ligase	-0.955	-0.921	-0.664	-0.648	-0.679	-0.694	-0.463	-0.603	-0.657	-0.521	-1.049	-0.845	-0.991	-0.828	down	down	down	down	down	down	down	down	down	down	down	down	down	down
Q9TZ90	mrpl-40	Mitochondrial Ribosomal Protein, Large	-1.84	-1.558	-1.787	-1.679	-1.825	-1.933	-0.687	-1.368	-1.387	-1.7	-1.724	-1.578	-1.727	-1.63	down	down	down	down	down	down	down	down	down	down	down	down	down	down
O02220	mrpl-34	L51_S25_CI-B8 domain-containing protein	-1.258	-1.186	-1.625	-1.572	-1.646	-1.64	-0.577	-0.68	-0.891	-0.681	-0.962	-1.068	-1.319	-1.164	down	down	down	down	down	down	down	down	down	down	down	down	down	down
O02153	grd-14	GRounDhog (Hedgehog-like family)	-1.261	-1.543	-1.839	-1.551	-1.726	-1.592	-1.047	-1.205	-1.075	-0.985	-1.567	-1.097	-1.636	-1.18	down	down	down	down	down	down	down	down	down	down	down	down	down	down
Q17572	C01G6.3	Uncharacterized protein	4.017	4.156	4.298	4.597	4.474	4.821	1.991	2.207	1.246	1.572	2.638	2.621	4.483	3.855	up	up	up	up	up	up	up	up	up	up	up	up	up	up
P34576	mua-3	Transmembrane cell adhesion receptor mua-3	-0.568	-0.327	-0.353	-0.154	-0.278	-0.091	-0.592	-0.654	-0.766	-0.786	-0.894	-0.629	-0.353	-0.754	down		down		down		down	down	down	down	down	down	down	down
Q9U2Y2	cdkr-3	CDK5RAP3-like protein	-1.212	-1.357	-1.244	-1.268	-1.214	-1.306	-0.548	-0.587	-0.865	-1.036	-1.137	-1.22	-1.31	-1.334	down	down	down	down	down	down	down	down	down	down	down	down	down	down
G5EE46	CELE_F54D5.12	FAD-binding PCMH-type domain-containing protein	-0.496	-0.478	-0.915	-1.171	-1.126	-1.292	0.726	0.832	0.805	0.592	0.734	0.271	-0.035	-0.376	down	down	down	down	down	down	up	up	up	up	up
O01603	cpg-22	Chondroitin ProteoGlycan	-2.134	-2.624	-1.244	-1.496	-0.866	-1.473	-2.377	-2.35	-2.133	-2.238	-1.702	-1.916	-2.003	-2.168	down	down	down	down		down	down	down	down	down	down	down	down	down
Q20334	tni-1	Troponin I 1	-3.361	-3.467	-3.403	-3.796	-4.362	-3.798	-2.565	-3.244	-3.237	-2.663	-3.595	-3.527	-3.865	-3.712	down	down	down	down	down	down	down	down	down	down	down	down	down	down
Q18493	C36A4.4	Probable UDP-N-acetylglucosamine pyrophosphorylase	0.52	0.386	0.804	0.926	0.813	0.998	0.577	0.689	0.59	0.603	0.562	0.605	0.526	0.677	up	up	up	up	up	up	up	up	up	up	up	up	up	up
Q94245	CELE_F57F4.1	Uncharacterized protein	-2.484	-3.158	-2.787	-2.41	-2.639	-1.641	-2.314	-3.502	-3.339	-2.631	-3.31	-3.36	-3.325	-2.994	down	down	down	down	down	down	down	down	down	down	down	down	down	down
P22981	let-60	Ras protein let-60	-0.928	-0.994	-0.924	-1.064	-0.855	-0.9	-0.628	-0.942	-0.965	-0.805	-1.191	-0.997	-1.037	-1.125	down	down	down	down	down	down	down	down	down	down	down	down	down	down
Q4W5P0	sqd-1	Homologous to Drosophila SQD (Squid) protein	-2.156	-2.148	-2.906	-2.88	-2.9	-3.088	-0.787	-1.193	-1.595	-1.5	-1.71	-2.071	-2.192	-2.024	down	down	down	down	down	down	down	down	down	down	down	down	down	down
Q95X82	dnsn-1	Downstream Neighbor of SoN homolog	1.881	1.716	1.658	1.649	1.64	1.708	1.076	1.044	1.522	1.678	1.562	1.372	1.933	2.109	up	up	up	up	up	up	up	up	up	up	up	up	up	up
Q18685	unc-112	Protein unc-112	-0.111	-0.023	-0.213	-0.145	-0.179	-0.042	-0.492	-0.561	-0.586	-0.526	-0.424	-0.31	-0.322	-0.299							down	down	down	down	down	down	down	down
Q20060	smc-4	Structural maintenance of chromosomes protein 4	1.03	0.982	1.434	1.474	1.356	1.454	0.582	0.583	0.751	0.917	0.783	0.789	1.092	1.201	up	up	up	up	up	up	up	up	up	up	up	up	up	up
Q9TYV3	CELE_W07E6.2	WD_REPEATS_REGION domain-containing protein	-1.412	-1.656	-1.621	-1.486	-1.366	-1.359	-0.718	-1.207	-1.615	-1.328	-1.672	-1.739	-1.664	-1.556	down	down	down	down	down	down	down	down	down	down	down	down	down	down
O02252	pcp-3	Prolyl Carboxy Peptidase like	-1.049	-1.446	-0.773	-0.725	-0.643	-0.401	-1.034	-1.318	-1.617	-1.416	-1.296	-1.197	-0.999	-1.276	down	down	down	down	down		down	down	down	down	down	down	down	down
Q21313	epi-1	Laminin-like protein epi-1	-0.46	-0.41	-0.411	-0.272	-0.284	-0.131	-0.611	-0.791	-0.873	-0.602	-0.931	-0.674	-0.734	-0.607	down	down	down	down	down		down	down	down	down	down	down	down	down
O02129	CELE_E03H12.7	Uncharacterized protein	-3.233	-3.27	-2.824	-3.384	-2.52	-2.323	-2.668	-3.375	-4.092	-2.982	-3.523	-3.056	-3.081	-2.986	down	down	down	down	down	down	down	down	down	down	down	down	down	down
Q0G819	tax-6	Serine/threonine-protein phosphatase 2B catalytic subunit	-1.598	-1.768	-0.934	-1.006	-1.044	-0.945	-1.105	-1.371	-1.724	-1.64	-2.176	-1.69	-1.875	-1.955	down	down	down	down	down	down	down	down	down	down	down	down	down	down
O45894	twk-33	TWiK family of potassium channels	0.215	0.543	1.093	0.913	0.594	0.489	2.055	1.223	0.661	0.242	0.704	0.129	0.311	0.596			up	up			up	up
A0A1C3NSL9	ajm-1	Apical junction molecule	-0.459	-0.328	-0.096	0.017	0.031	0.307	-0.704	-0.848	-0.798	-0.621	-0.833	-0.552	-0.395	-0.625	down						down	down	down	down	down	down		down
P34652	cnx-1	Calnexin	-0.843	-1.323	-0.186	0.056	-0.071	0.017	-0.702	-0.846	-0.975	-1.001	-0.912	-1.117	-0.715	-1.09	down	down					down	down	down	down	down	down	down	down
G5EE90	CELE_F09B9.4	Uncharacterized protein	-0.867	-0.517	0.047	-0.12	-0.52	-0.05	-1.484	-1.845	-1.338	-1.856	-1.304	-1.087	-0.989	-0.738	down						down	down	down	down	down	down	down
P02567	myo-1	Myosin-1	-1.28	-1.066	-0.876	-0.695	-0.895	-0.545	-0.889	-1.36	-1.49	-1.479	-1.524	-1.209	-1.385	-1.264	down	down	down	down	down	down	down	down	down	down	down	down	down	down
Q17417	col-149	Col_cuticle_N domain-containing protein	-2.774	-2.614	-3.051	-3.295	-2.693	-2.204	-1.873	-2.345	-2.39	-2.958	-2.526	-2.463	-3.193	-3.149	down	down	down	down	down	down	down	down	down	down	down	down	down	down
O01300	CELE_F09C8.1	Lipase_GDSL domain-containing protein	-0.641	-0.204	0.897	0.376	0.025	0.431	2.155	2.016	1.337	2.33	0.518	-0.464	-0.69	-0.461							up	up	up	up
G5EGK1	tln-1	Talin	-0.459	-0.361	-0.441	-0.275	-0.36	-0.233	-0.491	-0.618	-0.724	-0.719	-0.629	-0.542	-0.538	-0.571	down	down	down	down	down	down	down	down	down	down	down	down	down	down
Q9U380	chaf-1	CHromatin Assembly Factor	3.267	3.06	2.834	3.914	2.825	3.772	2.288	2.551	2.101	0.422	3.083	2.906	3.243	3.434	up	up	up	up	up	up	up	up	up		up	up	up	up
P91856	F26H9.5	Probable phosphoserine aminotransferase	-1.635	-1.763	-1.434	-1.395	-1.531	-1.307	-0.812	-0.856	-0.986	-0.803	-0.629	-0.86	-1.003	-1.628	down	down	down	down	down	down	down	down	down	down	down	down	down	down
Q19305	spon-1	Spondin-1	-0.438	-0.48	-0.328	-0.156	0.002	0.272	-2.104	-1.311	-1.098	-1.445	-0.857	-0.94	-0.74	-0.779							down	down	down	down
Q06561	unc-52	Basement membrane proteoglycan	-0.864	-0.778	-0.664	-0.463	-0.447	-0.109	-0.738	-1.09	-1.329	-1.131	-1.234	-0.941	-1.16	-1.004	down	down	down	down	down		down	down	down	down	down	down	down	down
O01692	rps-17	40S ribosomal protein S17	-1.666	-1.879	-1.22	-1.127	-1.361	-1.384	-0.775	-1.22	-1.568	-1.643	-1.599	-1.559	-1.953	-1.803	down	down	down	down	down	down	down	down	down	down	down	down	down	down
O17626	C31C9.2	Uncharacterized protein	-1.478	-1.928	-1.41	-1.342	-1.718	-1.32	-0.838	-0.925	-1.48	-1.398	-1.643	-1.598	-1.175	-2.086	down	down	down	down	down	down	down	down	down	down	down	down	down	down
Q95QC2	CELE_R02F2.9	RF_PROK_I domain-containing protein	-1.229	-1.253	-1.38	-1.151	-1.279	-1.326	-0.736	-0.857	-1.106	-1.139	-1.028	-1.153	-1.2	-1.287	down	down	down	down	down	down	down	down	down	down	down	down	down	down
E0R7L2	CELE_Y111B2A.12	WD_REPEATS_REGION domain-containing protein	-1.383	-1.374	-1.563	-1.479	-1.557	-1.241	-1.073	-1.529	-1.753	-1.924	-1.319	-1.516	-1.523	-1.602	down	down	down	down	down	down	down	down	down	down	down	down	down	down
A0A4V6M3U0	eps-8	SH3 domain-containing protein	-0.287	-0.099	-0.122	0.017	0.061	0.229	-0.587	-0.683	-0.666	-0.797	-0.486	-0.488	-0.418	-0.433							down	down	down	down	down	down	down	down
P34692	T01G9.2	PHAF1 protein T01G9.2	-0.079	-0.423	0.406	0.367	0.438	0.249	0.647	0.573	0.043	0.132	0.12	-0.05	-0.145	0.042		down	up	up	up		up	up
P52013	cyn-5	Peptidyl-prolyl cis-trans isomerase 5	-1.511	-1.4	-1.173	-1.136	-1.11	-1.228	-0.802	-1.159	-1.544	-1.65	-1.257	-1.524	-1.351	-1.756	down	down	down	down	down	down	down	down	down	down	down	down	down	down
Q9U2H9	eef-1B.2	Probable elongation factor 1-beta/1-delta 2	-1.524	-1.196	-1.116	-1.025	-1.205	-1.214	-0.589	-0.866	-1.121	-1.148	-1.033	-1.259	-1.238	-1.132	down	down	down	down	down	down	down	down	down	down	down	down	down	down
Q11189	mrps-17	28S ribosomal protein S17, mitochondrial	-1.635	-1.909	-1.893	-1.654	-1.776	-1.646	-0.87	-1.254	-1.604	-1.662	-1.625	-1.735	-1.772	-1.914	down	down	down	down	down	down	down	down	down	down	down	down	down	down
Q9GUC8	CELE_F14F9.4	Uncharacterized protein	0.039	-0.261	0.849	0.511	0.597	0.838	-1.082	-0.407	-0.119	0.056	-0.29	-0.677	0.656	-0.461			up	up	up	up	down					down	up
Q19325	scc-1	Sister chromatid cohesion protein 1	1.199	0.684	1.215	1.191	1.071	1.08	0.922	0.981	0.938	0.92	1.15	0.914	1.316	1.293	up	up	up	up	up	up	up	up	up	up	up	up	up	up
Q20790	CELE_F54F7.3	Uncharacterized protein	-1.096	-2.164	0.238	0.869	0.512	1.047	-4.984	-3.379	-4.503	-2.833	-4.361	-0.972	-3.034	-2.991							down	down	down		down		down	down
H2KZR3	unc-96	Uncharacterized protein	-0.629	-0.45	-0.454	-0.439	-0.382	-0.339	-0.762	-0.73	-0.539	-0.44	-0.579	-0.202	-0.51	-0.562	down	down	down	down	down	down	down	down	down		down		down	down
A8WFJ8	rcs-1	RING-type domain-containing protein	-1.106	-0.867	-1.181	-1.348	-0.902	-1.124	-0.836	-0.8	-0.813	-0.911	-0.992	-1.138	-1.287	-1.184	down	down	down	down	down	down	down	down	down	down	down	down	down	down
Q93934	adk-1	Adenosine kinase	-2.707	-2.981	-2.851	-2.813	-2.965	-2.861	-0.894	-1.539	-1.9	-2.275	-2.219	-2.316	-2.916	-2.927	down	down	down	down	down	down	down	down	down	down	down	down	down	down
P91917	ola-1	Obg-like ATPase 1	-0.926	-0.874	-0.928	-0.879	-0.913	-0.95	-0.38	-0.637	-0.648	-0.747	-0.686	-0.732	-0.917	-0.869	down	down	down	down	down	down	down	down	down	down	down	down	down	down
G5EG62	unc-45	TPR_REGION domain-containing protein	-1.478	-1.705	-1.554	-1.654	-1.752	-1.723	-0.572	-0.787	-0.895	-1.024	-1.253	-1.309	-1.555	-1.433	down	down	down	down	down	down	down	down	down	down	down	down	down	down
Q20819	tsfm-1	Elongation factor Ts, mitochondrial	-0.993	-1.204	-1.001	-0.929	-0.908	-0.99	-0.646	-0.871	-0.939	-0.647	-0.882	-0.95	-1.337	-0.953	down	down	down	down	down	down	down	down	down	down	down	down	down	down
P27798	crt-1	Calreticulin	-1.344	-1.335	-1.852	-1.756	-1.777	-1.8	-0.605	-0.658	-0.977	-0.942	-0.973	-1.204	-1.002	-1.451	down	down	down	down	down	down	down	down	down	down	down	down	down	down
Q9N3X8	rig-4	Protein sidekick homolog	1.969	2.174	2.229	2.225	2.331	2.183	1.344	1.369	1.88	1.85	1.483	1.85	2.127	2.043	up	up	up	up	up	up	up	up	up	up	up	up	up	up
Q21246	CELE_K05F1.9	Major sperm protein	-3.64	-3.474	-3.165	-2.834	-3.261	-2.475	-2.703	-3.74	-3.408	-3.211	-3.302	-3.048	-3.473	-3.847	down	down	down	down	down	down	down	down	down	down	down	down	down	down
G5ECQ3	sel-5	Serine/threonine-protein kinase sel-5	0.564	0.807	1.056	0.972	0.829	0.989	0.604	0.439	0.574	0.866	0.724	0.525	0.588	0.656	up	up	up	up	up	up	up	up	up	up	up	up	up	up
Q19537	rpa-1	Probable replication factor A 73 kDa subunit	1.16	1.044	1.649	1.69	1.589	2.051	0.844	0.777	0.597	0.548	0.724	0.567	1.266	1.024	up	up	up	up	up	up	up	up	up	up	up	up	up	up
Q18074	C18B2.3	Uncharacterized protein	-1.089	-1.048	-1.486	-1.26	-1.421	-1.291	-0.728	-0.797	-1.015	-0.899	-1.088	-0.838	-1.09	-1.13	down	down	down	down	down	down	down	down	down	down	down	down	down	down
A8WHT2	CELE_ZC412.10	Uncharacterized protein	2.131	2.216	2.488	2.642	3.11	2.554	-2.347	-1.442	-0.4	-0.327	0.476	0.819	1.711	2.248	up	up	up	up	up	up	down	down					up	up
O02297	sdz-30	SKN-1 Dependent Zygotic transcript	0.245	0.239	0.551	0.072	0.606	0.448	2.606	-0.078	-0.121	-0.051	-0.672	-0.134	-0.381	-0.025							up
Q09531	F07F6.4	Uncharacterized protein F07F6.4	-1.232	-1.259	-1.331	-1.458	-1.482	-1.442	-0.539	-0.791	-0.911	-1.172	-0.918	-1.115	-1.207	-1.223	down	down	down	down	down	down	down	down	down	down	down	down	down	down
Q23420	CELE_ZK1248.11	E3 SUMO-protein ligase NSE2	0.473	0.518	0.758	0.848	0.589	0.736	0.698	0.443	0.522	0.529	0.762	0.273	0.478	0.646	up	up	up	up	up	up	up	up	up	up	up		up	up
O18693	acs-2	Fatty Acid CoA Synthetase family	0.46	0.523	0.963	0.123	-0.279	0.975	2.326	1.63	1.673	1.042	1.7	1.597	0.91	0.973							up	up	up		up	up
O17799	CELE_F13A7.1	Major sperm protein	-3.704	-4.776	-3.6	-3.606	-3.24	-3.367	-2.461	-4.585	-3.378	-3.738	-4.126	-4.38	-3.888	-3.926	down	down	down	down	down	down	down	down	down	down	down	down	down	down
Q10123	F52C9.3	Uncharacterized protein F52C9.3	-0.978	-1.019	-1.11	-1.251	-1.099	-1.272	-0.587	-0.819	-0.915	-0.861	-1.23	-0.929	-1.213	-1.123	down	down	down	down	down	down	down	down	down	down	down	down	down	down
Q20751	iff-2	Eukaryotic translation initiation factor 5A-2	-1.866	-1.798	-1.774	-2.196	-1.974	-2.108	-0.8	-0.932	-1.376	-1.474	-1.518	-1.514	-1.698	-1.948	down	down	down	down	down	down	down	down	down	down	down	down	down	down
U4PR86	pig-1	Maternal embryonic leucine zipper kinase	0.865	0.715	0.94	1.032	0.958	0.965	0.713	0.638	0.432	0.42	0.504	0.439	0.867	0.959	up	up	up	up	up	up	up	up	up		up	up	up	up
P46769	rps-0	40S ribosomal protein SA	-1.363	-1.52	-0.964	-0.902	-0.909	-0.938	-0.528	-0.79	-1.071	-0.885	-1.186	-1.251	-1.472	-1.209	down	down	down	down	down	down	down	down	down	down	down	down	down	down
Q09501	ifp-1	Intermediate filament protein ifp-1	-1.634	-1.571	-1.523	-1.43	-1.307	-1.108	-1.026	-1.404	-1.779	-1.55	-1.558	-1.75	-1.676	-1.664	down	down	down	down	down	down	down	down	down	down	down	down	down	down
Q22422	gem-4	Gon-2 Extragenic Modifier	0.926	1.088	1.323	1.414	1.548	1.436	-1.233	-0.563	-0.186	-0.162	-0.112	0.33	0.535	0.732	up	up	up	up	up	up	down
Q18738	C50F4.10	Protein kinase domain-containing protein	-3.387	-3.413	-1.923	-1.824	-2.746	-2.013	-2.322	-2.448	-2.474	-2.6	-4.397	-3.202	-2.826	-3.08	down	down	down	down	down	down	down	down	down	down	down	down	down	down
Q17433	dnj-2	DnaJ homolog dnj-2	-0.55	-0.645	-0.636	-0.674	-0.54	-0.659	-0.513	-0.516	-0.617	-0.331	-0.445	-0.683	-0.695	-0.474	down	down	down	down	down	down	down	down	down	down	down	down	down	down
P90747	catp-8	Probable manganese-transporting ATPase catp-8	-0.423	-0.565	-0.618	-0.655	-0.551	-0.521	-0.505	-0.545	-0.731	-0.736	-0.685	-0.723	-0.542	-0.756	down	down	down	down	down	down	down	down	down	down	down	down	down	down
O45293	gly-8	Probable N-acetylgalactosaminyltransferase 8	-2.956	-3.306	-3.509	-3.556	-3.766	-3.519	-1.067	-1.58	-1.721	-1.855	-1.601	-2.368	-2.564	-3.287	down	down	down	down	down	down	down	down	down	down	down	down	down	down
Q8WQB3	apg-1	AP-1 complex subunit gamma	-0.698	-0.52	-0.845	-0.958	-0.905	-0.893	-0.528	-0.522	-0.528	-0.394	-0.57	-0.54	-0.65	-0.753	down	down	down	down	down	down	down	down	down	down	down	down	down	down
Q94417	clec-91	C-type lectin domain-containing protein 91	1.867	2.156	2.321	2.501	2.597	2.795	1.323	1.364	1.126	0.772	1.764	1.185	2.174	2	up	up	up	up	up	up	up	up	up		up	up	up	up
Q7JNG1	atp-3	ATP synthase subunit O, mitochondrial	-1.087	-1.202	-1.153	-1.068	-1.217	-1.174	-0.566	-0.839	-0.909	-0.79	-0.99	-0.736	-1.181	-1.037	down	down	down	down	down	down	down	down	down	down	down	down	down	down
Q9U3K1	CELE_F11A10.6	Uncharacterized protein	-1.453	-0.889	-1.241	-1.564	-1.427	-2.336	-1.601	-1.294	-1.081	-0.899	-1.188	-1.119	-0.843	-1.187	down		down	down	down	down	down	down	down		down	down		down
G5EF90	CELE_K01D12.15	Uncharacterized protein	-7.11	-6.489	-5.888	-5.472	-5.819	-4.345	-2.508	-5.021	-5.519	-5.817	-6.252	-5.009	-5.494	-6.011	down	down	down	down	down	down	down	down	down	down	down	down	down	down
Q19495	ent-5	Equilibrative Nucleoside Transporter	-0.389	0.989	0.714	1.691	1.811	0.748	3.197	0.512	-0.013	0.873	-0.304	0.544	0.555	1.453				up	up		up
O17005	mrpl-4	Mitochondrial Ribosomal Protein, Large	-0.904	-0.872	-0.708	-0.466	-0.596	-0.915	-0.583	-0.738	-0.73	-0.581	-0.858	-0.874	-1.129	-0.829	down	down	down	down	down	down	down	down	down	down	down	down	down	down
Q9N3X2	rps-4	40S ribosomal protein S4	-1.304	-1.502	-1.491	-1.434	-1.452	-1.578	-0.562	-0.735	-1.088	-0.964	-1.326	-1.228	-1.501	-1.236	down	down	down	down	down	down	down	down	down	down	down	down	down	down
P48156	rps-8	40S ribosomal protein S8	-1.195	-1.279	-1.117	-1.049	-1.042	-1.142	-0.451	-0.624	-0.874	-0.769	-1.12	-1.023	-1.292	-1.143	down	down	down	down	down	down	down	down	down	down	down	down	down	down
Q20924	sun-1	Sun domain-containing protein 1	0.236	0.319	-0.004	-0.016	0.04	-0.212	0.812	0.603	0.47	0.699	0.414	0.455	0.273	0.396							up	up	up	up
G5ECY0	dlg-1	Disks large homolog 1	0.381	0.398	0.732	0.727	0.928	1.48	-0.862	-0.768	-0.746	-0.864	-0.632	-0.441	0.607	-0.187			up	up	up	up	down	down	down	down	down		up
Q23629	ogdh-2	Probable 2-oxoglutarate dehydrogenase E1 component DHKTD1 homolog, mitochondrial	0.339	0.428	-0.288	-0.427	-0.277	-0.361	0.488	0.656	0.721	0.687	0.769	0.591	0.547	0.358	up	up	down	down	down	down	up	up	up	up	up	up	up	up
Q21067	ifc-2	Intermediate filament protein ifc-2	-0.002	0.16	0.223	0.538	0.397	0.834	-0.772	-0.934	-0.891	-0.735	-0.701	-0.242	-0.341	-0.213				up	up	up	down	down	down	down	down
O01553;O01554	CELE_F47B3.4	Uncharacterized protein	-2.717	-2.324	-1.31	-1.569	-1.382	-1.109	-2.134	-2.398	-2.117	-2.399	-2.567	-2.654	-2.265	-2.183	down	down	down	down	down	down	down	down	down	down	down	down	down	down
Q8MQ51	nucb-1	NUCleoBindin homolog	-0.758	-0.75	-0.469	-0.294	-0.366	-0.422	-0.59	-0.63	-0.702	-1.001	-0.633	-0.912	-0.651	-0.906	down	down	down	down	down	down	down	down	down	down	down	down	down	down
Q7YX43	C50B8.6	Uncharacterized protein	-0.865	0.121	0.353	0.229	0.441	0.353	-1.295	-0.86	-0.406	-0.422	-0.393	-0.22	0.202	-0.106	down						down	down
Q22141	pgap-2	Post-GPI attachment to proteins factor 2	-1.843	-2.206	-2.175	-1.659	-1.74	-1.377	-2.47	-2.627	-2.42	-2.215	-2.344	-2.702	-2.352	-2.777	down	down	down	down	down	down	down	down	down	down	down	down	down	down
Q19132	CELE_F07A11.4	Ubiquitin carboxyl-terminal hydrolase	-1.142	-0.991	-1.151	-1.209	-1.169	-1.384	-0.792	-0.915	-0.849	-0.915	-1.032	-0.803	-1.048	-1.103	down	down	down	down	down	down	down	down	down	down	down	down	down	down
Q19520	ctf-4	Mcl1_mid domain-containing protein	1.315	1.054	1.735	1.751	1.604	1.826	0.801	0.835	0.895	1.007	1.047	0.795	1.198	1.332	up	up	up	up	up	up	up	up	up	up	up	up	up	up
Q9BL54	psf-3	DNA replication complex GINS protein PSF3	1.403	1.129	1.222	1.182	1.109	1.512	0.839	0.846	0.452	0.747	0.818	0.805	1.221	1.099	up	up	up	up	up	up	up	up		up	up	up	up	up
P34609	unc-16	JNK-interacting protein	-0.541	-0.438	-0.415	-0.498	-0.407	-0.452	-0.566	-0.418	-0.466	-0.173	-0.438	-0.424	-0.531	-0.403	down	down	down	down	down	down	down	down	down		down	down	down	down
H2L049	CELE_F46H5.7	Uncharacterized protein	-0.994	-0.923	-0.981	-1.144	-1.11	-1.122	-0.75	-0.941	-0.952	-1.314	-0.823	-0.962	-1.24	-1.231	down	down	down	down	down	down	down	down	down	down	down	down	down	down
O62432	dpy-4	Col_cuticle_N domain-containing protein	-2.143	-2.339	-2.275	-2.486	-2.326	-1.905	-1.044	-1.694	-1.927	-2.034	-1.713	-1.955	-2.181	-2.209	down	down	down	down	down	down	down	down	down	down	down	down	down	down
Q9XUT6	CELE_K08C9.2	Uncharacterized protein	-1.081	-1.282	-0.069	-0.912	-1.439	-0.934	-2.809	-1.939	-1.967	-1.266	-1.35	-1.116	-2.208	-1.141					down		down	down	down				down
O02324	lbp-8	Fatty acid-binding protein homolog 8	-1.405	0.133	0.039	0.242	0	0.078	1.777	1.103	0.962	-0.186	0.554	-0.183	-0.552	-0.774	down						up	up
G5EFB5	cpn-1	CPN-1	1.061	1.012	0.72	0.906	0.894	0.819	0.701	0.885	1.07	1.088	1.319	1.027	0.895	1.056	up	up	up	up	up	up	up	up	up	up	up	up	up	up
Q9UB28	let-805	Myotactin form B	0.023	0.073	0.163	0.334	0.255	0.436	-0.46	-0.575	-0.472	-0.411	-0.351	-0.179	-0.224	-0.182				up	up	up	down	down	down	down	down
Q9GYI2	mrps-21	Mitochondrial Ribosomal Protein, Small	-1.5	-1.675	-1.463	-1.32	-1.526	-1.299	-0.799	-1.164	-1.28	-1.32	-1.556	-1.427	-1.583	-1.593	down	down	down	down	down	down	down	down	down	down	down	down	down	down
Q10654	cyb-3	G2/mitotic-specific cyclin-B3	1.407	1.64	1.986	2.035	2.023	2.325	1.098	0.392	0.008	0.477	0.45	0.799	1.561	1.439	up	up	up	up	up	up	up					up	up	up
P90901	ifa-1	Intermediate filament protein ifa-1	0.531	0.714	0.631	0.766	0.711	1.089	-0.592	-0.49	-0.343	-0.042	0.041	0.262	0.296	0.22	up	up	up	up	up	up	down	down	down
Q94399	col-63	Col_cuticle_N domain-containing protein	-3.934	-4.282	-4.461	-3.352	-3.783	-3.452	-1.943	-2.888	-4.138	-5.548	-3.977	-4.523	-4.277	-4.722	down	down	down	down	down	down	down	down	down	down	down	down	down	down
Q93572	rla-0	60S acidic ribosomal protein P0	-1.209	-1.417	-1.437	-1.27	-1.381	-1.507	-0.595	-0.738	-0.895	-1.021	-1.133	-1.124	-1.373	-1.078	down	down	down	down	down	down	down	down	down	down	down	down	down	down
Q17740	ain-1	ALG-1 INteracting protein	-1.018	-1.13	-0.911	-0.866	-0.878	-0.346	-0.92	-1.397	-1.757	-1.963	-1.669	-1.767	-1.038	-1.537	down	down	down	down	down		down	down	down	down	down	down	down	down
Q93511	romo-1	Reactive oxygen species modulator 1	-1.404	-1.66	-1.541	-1.605	-1.563	-1.514	-0.772	-1.052	-1.025	-1.472	-1.408	-1.325	-1.413	-1.46	down	down	down	down	down	down	down	down	down	down	down	down	down	down
O76606	mrpl-28	39S ribosomal protein L28, mitochondrial	-0.88	-0.92	-0.716	-0.788	-0.632	-0.959	-0.612	-0.508	-0.509	-0.275	-0.656	-0.563	-0.666	-0.523	down	down	down	down	down	down	down	down	down		down	down	down	down
P19974	cyc-2.1	Cytochrome c 2.1	-0.96	-0.841	-1.147	-1.235	-1.48	-1.368	-0.689	-0.827	-0.723	-0.792	-0.509	-0.612	-0.954	-1.064	down	down	down	down	down	down	down	down	down	down	down	down	down	down
O18697	CELE_T04D3.1	Uncharacterized protein	0.833	0.88	0.999	1.354	1.325	0.625	1.476	1.75	1.488	1.956	1.392	0.856	0.546	1.302			up	up	up		up	up	up	up	up			up
Q20528	clec-79	C-type lectin domain-containing protein	-2.63	1.963	-1.843	-2.137	-1.959	-1.848	-3.165	-2.293	-2.993	-2.255	-2.589	-2.413	-3.307	-2.484	down	up	down	down	down	down	down	down	down	down	down	down	down	down
G5EDS8	exos-7	RNase_PH domain-containing protein	-1.246	-1.362	-0.797	-0.728	-0.567	-0.59	-0.67	-1.199	-1.276	-1.105	-1.485	-1.22	-1.255	-1.196	down	down	down	down	down	down	down	down	down	down	down	down	down	down
Q21801	gana-1	Alpha-galactosidase	-0.773	-0.909	-1.013	-1.091	-0.875	-0.898	-0.795	-1.316	-1.331	-1.072	-0.902	-1.349	-0.745	-1.067	down	down	down	down	down	down	down	down	down	down	down	down	down	down
P52819	rpl-22	60S ribosomal protein L22	-1.417	-1.724	-1.323	-1.343	-1.09	-1.298	-0.723	-0.892	-0.934	-0.983	-1.492	-1.279	-1.795	-1.378	down	down	down	down	down	down	down	down	down	down	down	down	down	down
Q23240	cyc-2.2	Probable cytochrome c 2.2	-5.303	-5.301	-4.306	-4.35	-4.346	-3.974	-2.306	-4.89	-4.273	-4.307	-4.774	-4.534	-5.174	-4.538	down	down	down	down	down	down	down	down	down	down	down	down	down	down
Q21294	ssq-1	Sperm-Specific family, class Q	-3.582	-3.464	-2.677	-3.053	-2.556	-2.797	-2.28	-3.408	-3.172	-3.096	-3.714	-3.278	-2.99	-3.676	down	down	down	down	down	down	down	down	down	down	down	down	down	down
Q9BL86	mrpl-38	Mitochondrial Ribosomal Protein, Large	-0.82	-0.754	-0.622	-0.646	-0.507	-0.714	-0.509	-0.484	-0.435	-0.306	-0.63	-0.562	-0.752	-0.617	down	down	down	down	down	down	down	down	down		down	down	down	down
A0A0K3AR51	CELE_F22G12.5	DHR-2 domain-containing protein	0.907	0.922	1.383	1.594	1.425	1.37	0.451	0.442	0.675	0.8	0.728	0.693	1.013	1.053	up	up	up	up	up	up	up	up	up	up	up	up	up	up
G5EC67	2O16	2O16	-1.773	-2.357	-1.783	-1.504	-1.764	-1.761	-0.751	-1.341	-1.666	-1.511	-2.014	-1.715	-2.103	-1.773	down	down	down	down	down	down	down	down	down	down	down	down	down	down
P91870	spd-2	Spindle-defective protein 2	1.43	1.543	1.522	1.347	1.475	1.336	0.739	1.258	1.71	1.781	1.696	1.411	1.452	1.916	up	up	up	up	up	up	up	up	up	up	up	up	up	up
P91287	CELE_F27C1.1	Uncharacterized protein	-2.417	-2.098	-2.011	-2.028	-1.259	-1.553	-1.9	-2.746	-2.154	-2.297	-3.023	-2.124	-1.538	-1.847	down	down	down	down	down	down	down	down	down	down	down	down	down	down
G5EDE8	ile-1	ERGIC-53-like protein	-0.864	-0.977	-0.746	-0.799	-0.846	-0.863	-0.427	-0.551	-0.865	-0.892	-0.764	-0.836	-0.952	-0.96	down	down	down	down	down	down	down	down	down	down	down	down	down	down
Q22716	rpl-32	60S ribosomal protein L32	-1.624	-1.845	-2.145	-2.119	-2.067	-2.103	-0.622	-0.888	-1.114	-1.229	-1.442	-1.5	-1.797	-1.695	down	down	down	down	down	down	down	down	down	down	down	down	down	down
O61747	B0205.10	Uncharacterized protein	-4.484	-4.1	-3.628	-3.818	-3.557	-2.885	-2.272	-3.307	-4.659	-4.31	-3.942	-4.143	-3.853	-3.939	down	down	down	down	down	down	down	down	down	down	down	down	down	down
A4UVL1	CELE_D1086.17	Uncharacterized protein	-2.554	-1.933	-2.044	-1.996	-2.2	-1.528	-2.085	-3.101	-3.017	-3.446	-3.238	-3.481	-2.929	-2.719	down	down	down	down	down	down	down	down	down	down	down	down	down	down
P50464	unc-97	LIM domain-containing protein unc-97	-0.591	-0.703	-1.376	-1.319	-1.314	-1.14	-0.834	-1.014	-0.875	-0.709	-0.873	-0.702	-0.598	-0.882	down	down	down	down	down	down	down	down	down	down	down	down	down	down
O62246	cope-1	Coatomer subunit epsilon	-0.938	-1.115	-0.342	-0.33	-0.4	-0.391	-0.71	-1.044	-0.865	-0.739	-0.992	-0.986	-0.938	-0.931	down	down			down	down	down	down	down	down	down	down	down	down
O44476	hoe-1	Ribonuclease Z	-0.516	-0.558	-0.502	-0.271	-0.346	-0.358	-0.621	-0.683	-0.724	-0.546	-0.657	-0.736	-0.377	-0.375	down	down	down		down	down	down	down	down	down	down	down
H2KYD9	CELE_F26G5.1	Uncharacterized protein	0.886	0.939	1.5	1.747	1.479	1.254	1.165	1.188	1.426	1.282	1.525	1.208	1.441	1.845	up	up	up	up	up	up	up	up	up	up	up	up	up	up
Q94401	nsph-2	Nematode Specific Peptide family	-2.008	-2.283	-0.993	-1.794	-1.859	-1.854	-2.135	-2.623	-2.069	-2.612	-3.135	-2.094	-3.464	-2.422	down	down		down	down	down	down	down	down	down	down	down	down	down
P90735	eat-6	Sodium/potassium-transporting ATPase subunit alpha	-0.986	-0.993	-0.995	-0.982	-0.935	-0.874	-0.548	-0.797	-0.889	-0.803	-0.943	-0.829	-1.039	-1.018	down	down	down	down	down	down	down	down	down	down	down	down	down	down
Q8I4C0	col-42	Col_cuticle_N domain-containing protein	-5.292	-3.94	-4.955	-5.444	-5.449	-5.37	-2.656	-3.924	-3.869	-3.369	-4.918	-5.122	-5.226	-5.608	down	down	down	down	down	down	down	down	down	down	down	down	down	down
O62146	F09B12.3	Putative phospholipase B-like 2	-1.064	-0.848	-1.361	-1.131	-1.496	-1.318	-0.831	-1.1	-1.118	-1.154	-0.95	-0.97	-0.903	-0.979	down	down	down	down	down	down	down	down	down	down	down	down	down	down
Q21465	zig-12	Ig-like domain-containing protein	-0.965	-0.782	-1.069	-1.005	-1.204	-1.265	-0.748	-0.911	-0.903	-0.989	-0.69	-0.664	-0.824	-0.792	down	down	down	down	down	down	down	down	down	down	down	down	down	down
Q18066	dim-1	Disorganized muscle protein 1	-1.421	-1.581	-1.716	-1.566	-1.824	-1.43	-0.94	-1.435	-1.542	-1.378	-1.422	-1.361	-1.49	-1.524	down	down	down	down	down	down	down	down	down	down	down	down	down	down
Q23519	msp-152	Major sperm protein 152	-4.798	-4.309	-4.39	-4.001	-3.738	-3.58	-2.289	-4.711	-3.907	-4.411	-4.947	-4.668	-4.818	-4.802	down	down	down	down	down	down	down	down	down	down	down	down	down	down
Q9N4F3	apb-1	AP complex subunit beta	-0.538	-0.53	-0.577	-0.604	-0.546	-0.402	-0.374	-0.284	-0.354	-0.43	-0.46	-0.495	-0.478	-0.585	down	down	down	down	down	down	down	down	down	down	down	down	down	down
Q8IG73;Q9GYS3	C48E7.7	Uncharacterized protein	-1.376	-1.719	-0.806	-1.144	-0.815	-1.026	-1.659	-1.454	-1.381	-1.822	-2.075	-1.58	-1.268	-1.245	down	down		down	down	down	down	down	down	down	down	down	down	down
P29691	eef-2	Elongation factor 2	-1.384	-1.512	-1.073	-1.063	-1.174	-1.13	-0.519	-0.857	-1.026	-1.063	-1.188	-1.06	-1.401	-1.256	down	down	down	down	down	down	down	down	down	down	down	down	down	down
O16628	CELE_K02F6.7	Uncharacterized protein	1.093	1.141	1.466	1.502	1.473	1.58	0.584	0.387	0.602	0.741	0.869	0.807	1.022	1.248	up	up	up	up	up	up	up	up	up	up	up	up	up	up
O45781	drr-2	RRM domain-containing protein	-1.193	-1.458	-1.115	-1.048	-1.109	-1.042	-0.585	-1.032	-1.172	-1.387	-1.456	-1.161	-1.495	-1.436	down	down	down	down	down	down	down	down	down	down	down	down	down	down
O01326	drsh-1	Ribonuclease 3	1.528	1.871	1.928	1.623	2.266	1.96	1.139	1.203	1.722	1.862	0.989	1.545	1.662	1.655	up	up	up	up	up	up	up	up	up	up	up	up	up	up
Q95QD7	lin-54	Protein lin-54	1.194	1.178	1.131	1.131	1.113	1.151	0.808	0.582	0.957	1.027	0.919	0.721	1.328	1.194	up	up	up	up	up	up	up	up	up	up	up	up	up	up
Q19317	sel-2	Putative neurobeachin homolog	-0.67	-0.611	-0.215	-0.315	-0.23	-0.243	-0.416	-0.494	-0.411	-0.463	-0.611	-0.44	-0.464	-0.556	down	down	down	down	down	down	down	down	down	down	down	down	down	down
Q18012	bbln-1	Bulges Budding from the intestinal LumeN	-0.478	-0.718	0.159	0.201	0.587	0.391	-0.957	-0.762	-1.085	-1.138	-0.666	-0.886	-0.629	-0.352		down			up		down	down	down	down	down	down	down
Q10944	pho-5	Putative acid phosphatase 5	0.91	1.064	1.195	1.071	1.024	0.72	0.772	0.957	1.377	1.466	1.646	1.517	1.234	1.362	up	up	up	up	up	up	up	up	up	up	up	up	up	up
O01761	unc-89	Muscle M-line assembly protein unc-89	-0.52	-0.471	-0.606	-0.583	-0.721	-0.559	-0.527	-0.625	-0.607	-0.489	-0.459	-0.335	-0.586	-0.541	down	down	down	down	down	down	down	down	down	down	down	down	down	down
Q19328	tsn-1	Staphylococcal nuclease domain-containing protein	-1.363	-1.425	-1.278	-1.194	-1.256	-1.177	-0.426	-0.584	-0.871	-1.002	-1.094	-1.118	-1.285	-1.3	down	down	down	down	down	down	down	down	down	down	down	down	down	down
Q95YB2	acdh-9	Acyl CoA DeHydrogenase	-0.073	0.244	-0.228	-0.398	-0.296	-0.175	0.704	0.42	0.37	0.303	0.231	0.214	-0.107	0.104				down			up	up
A0A0K3AS98	pei-2	BTB domain-containing protein	-2.506	-1.693	-0.826	-0.733	-1.358	-1.198	-1.927	-2.178	-2.01	-1.765	-2.734	-1.848	-2.49	-1.529	down	down			down	down	down	down	down	down	down	down	down	down
Q17631	ttbk-5	Protein kinase domain-containing protein	-2.428	-1.897	-1.755	-2.025	-2.015	-1.845	-2.033	-2.754	-2.046	-2.556	-3.718	-2.458	-2.487	-2.025	down	down	down	down	down	down	down	down	down	down	down	down	down	down
Q9XX16	orc-4	ORC (Origin Recognition Complex) subunit	0.711	0.659	0.913	1.06	1.004	0.93	0.613	0.737	0.853	0.871	0.932	0.779	0.929	0.979	up	up	up	up	up	up	up	up	up	up	up	up	up	up
Q17633	nsph-3.2	Nematode Specific Peptide family	-5.879	-6.678	-5.201	-5.76	-6.255	-5.062	-2.891	-5.057	-6.9	-6.524	-7.178	-6.721	-6.685	-5.98	down	down	down	down	down	down	down	down	down	down	down	down	down	down
A0A4V0ING4	acs-17	Fatty Acid CoA Synthetase family	-0.212	-0.435	-0.564	-0.822	-0.684	-0.87	-0.75	-0.705	-0.687	-0.771	-0.399	-0.416	-0.741	-0.604			down	down	down	down	down	down	down	down			down	down
Q9XUS9	cyk-4	CYtoKinesis defect	1.838	1.961	1.809	1.871	1.842	2.227	0.779	0.73	1.107	1.309	1.217	1.122	2.138	1.738	up	up	up	up	up	up	up	up	up	up	up	up	up	up
O17726	CELE_D1086.1	DUF19 domain-containing protein	3.789	4.029	4.303	4.118	4.185	3.657	1.741	2.324	2.926	3.65	3.236	3.689	3.366	4.069	up	up	up	up	up	up	up	up	up	up	up	up	up	up
O76623	CELE_Y57G7A.6	WSN domain-containing protein	-2.559	-1.039	-1.826	-1.48	-2.106	-1.587	-1.994	-2.67	-2.552	-2.253	-2.277	-2.129	-1.971	-2.662	down		down	down	down	down	down	down	down	down	down	down	down	down
Q19286	ifb-2	Intermediate filament protein ifb-2	-0.065	0.105	0.025	0.221	0.11	0.557	-0.68	-0.886	-0.863	-0.64	-0.634	-0.445	-0.371	-0.264						up	down	down	down	down	down	down
G5EDT4	CELE_T01D3.6	Uncharacterized protein	-0.599	-0.42	-0.24	-0.015	-0.044	-0.144	-0.979	-0.897	-0.987	-0.821	-0.585	-0.677	-0.354	-0.531							down	down	down	down	down	down
G3MU29	CELE_ZC434.9	ShKT domain-containing protein	-1.707	-1.762	-0.975	-1.044	-1.114	-0.855	-1.143	-1.403	-1.468	-1.006	-1.609	-1.35	-1.669	-1.429	down	down	down	down	down	down	down	down	down	down	down	down	down	down
Q93425	mrps-5	Putative 28S ribosomal protein S5, mitochondrial	-1.142	-1.232	-1.33	-1.228	-1.264	-1.365	-0.755	-0.949	-1.145	-1.18	-0.968	-1.301	-1.303	-1.349	down	down	down	down	down	down	down	down	down	down	down	down	down	down
O45944	Y45F10C.4	UPF0375 protein Y45F10C.4	0.617	-0.154	-3.877	-3.571	-4.249	-3.531	-2.457	-1.52	-1.28	-1.078	-0.057	-0.618	0.075	0.072			down	down	down	down	down	down
Q9XXE2	CELE_Y44A6D.2	Uncharacterized protein	-1.17	-1.608	-0.911	-0.729	-0.832	-0.726	-1.08	-1.576	-1.577	-1.268	-1.959	-1.533	-1.312	-1.278	down	down	down	down	down	down	down	down	down	down	down	down	down	down
Q9XWV5	mrps-10	Probable 28S ribosomal protein S10, mitochondrial	-0.939	-0.984	-0.726	-0.769	-0.824	-0.979	-0.749	-0.87	-0.835	-0.584	-0.826	-0.771	-0.959	-0.813	down	down	down	down	down	down	down	down	down	down	down	down	down	down
O45719	CELE_R11H6.2	Uncharacterized protein	1.485	1.43	2.109	2.447	2.216	2.302	1.805	1.894	1.872	1.744	1.884	1.682	2.114	1.864	up	up	up	up	up	up	up	up	up	up	up	up	up	up
Q21952	him-10	Kinetochore protein Nuf2 homolog	0.802	0.678	1.181	1.256	1.07	1.166	0.629	0.643	0.594	0.642	0.553	0.64	0.675	0.794	up	up	up	up	up	up	up	up	up	up	up	up	up	up
Q9NAC5	pole-4	CBFD_NFYB_HMF domain-containing protein	1.065	0.891	1.805	1.757	1.53	1.745	0.87	1.057	0.458	0.738	1.081	0.899	1.137	1.188	up	up	up	up	up	up	up	up		up	up	up	up	up
O45069	C11D2.4	Queuosine salvage protein	-1.692	-1.931	-1.955	-2.008	-2.095	-2.053	-0.543	-0.86	-1.175	-1.421	-1.336	-1.644	-1.766	-1.611	down	down	down	down	down	down	down	down	down	down	down	down	down	down
Q067X2	ule-2	Uterine Lumin Expressed/locailized	2.92	2.756	2.96	3.334	3.113	3.005	-1.102	-0.367	0.474	1.134	1.786	2.021	2.707	2.978	up	up	up	up	up	up	down			up	up	up	up	up
Q9U266	hda-10	Hist_deacetyl domain-containing protein	1.014	1.157	1.247	1.175	1.221	1.262	0.609	0.723	0.874	1.245	1.075	0.866	1.112	1.144	up	up	up	up	up	up	up	up	up	up	up	up	up	up
Q23500	aco-1	Cytoplasmic aconitate hydratase	-3.142	-3.15	-3.047	-3.096	-3.302	-3.034	-0.684	-1.263	-1.913	-2.146	-2.391	-2.283	-2.868	-3.209	down	down	down	down	down	down	down	down	down	down	down	down	down	down
O17732	pyc-1	Pyruvate carboxylase 1	0.105	0.078	-0.196	-0.278	-0.272	-0.213	0.383	0.508	0.591	0.745	0.649	0.524	0.301	0.066			down	down	down	down	up	up	up	up	up	up	up
A0A7I9BCB0;Q09359	ZK1307.1	Uncharacterized protein;Uncharacterized protein ZK1307.1	-2.112	-1.997	-1.707	-1.997	-1.885	-1.941	-0.776	-0.723	-1.067	-1.079	-1.518	-1.392	-1.608	-2.239	down	down	down	down	down	down	down	down	down	down	down	down	down	down
Q9XUE7	cfp-1	CXXC-type zinc finger protein 1	2.754	3.165	3.087	2.921	2.789	3.217	2.714	2.41	1.819	2.647	2.367	2.332	3.343	2.628	up	up	up	up	up	up	up	up	up	up	up	up	up	up
Q20448	ztf-7	Zinc finger protein ztf-7	-0.536	-0.465	-0.904	-0.751	-0.764	-0.752	-0.518	-0.655	-0.596	-0.55	-0.46	-0.405	-0.564	-0.522	down	down	down	down	down	down	down	down	down	down	down	down	down	down
O45298	atgp-2	Aamy domain-containing protein	-0.783	-0.565	-0.363	-0.178	-0.193	0.001	-0.629	-0.862	-0.876	-0.771	-0.832	-0.732	-0.724	-0.848	down	down	down				down	down	down	down	down	down	down	down
Q95XN2	mppa-1	Mitochondrial-processing peptidase subunit alpha	-1.699	-1.785	-1.378	-1.308	-1.346	-1.349	-0.646	-1.215	-1.603	-1.374	-1.675	-1.5	-1.751	-1.742	down	down	down	down	down	down	down	down	down	down	down	down	down	down
O18199	mrpl-37	Mitochondrial Ribosomal Protein, Large	-1.002	-1.072	-1.071	-1.133	-1.029	-1.177	-0.521	-0.681	-0.783	-0.623	-0.863	-0.902	-1.097	-0.919	down	down	down	down	down	down	down	down	down	down	down	down	down	down
O16297	mcm-7	DNA replication licensing factor MCM7	0.68	0.543	0.745	0.786	0.61	1.005	0.966	0.629	0.377	0.26	0.462	0.296	0.578	0.506	up		up	up	up	up	up	up
Q9XX18	mrpl-22	39S ribosomal protein L22, mitochondrial	-1.175	-1.235	-1.641	-1.711	-1.531	-1.393	-0.599	-0.863	-0.999	-0.985	-1.071	-1.07	-1.257	-1.368	down	down	down	down	down	down	down	down	down	down	down	down	down	down
Q9N599	pas-3	Proteasome subunit alpha type-4	-1.703	-2.288	-1.16	-0.909	-1.169	-0.852	-1.095	-2.047	-2.111	-2.614	-2.079	-2.1	-2.072	-2.172	down	down	down	down	down	down	down	down	down	down	down	down	down	down
Q20644	CELE_F52B5.3	Uncharacterized protein	0.592	0.513	0.426	0.453	0.531	0.291	0.457	0.552	0.646	0.73	0.615	0.578	0.459	0.738	up	up	up	up	up	up	up	up	up	up	up	up	up	up
Q17603	asfl-1	Probable histone chaperone asf-1-like protein	0.914	0.85	1.031	0.936	0.967	1.131	0.659	0.693	0.735	0.879	0.804	0.555	1.033	1.009	up	up	up	up	up	up	up	up	up	up	up	up	up	up
Q94053	msp-78	Major sperm protein 78	-8.368	-7.581	-8.14	-7.714	-7.932	-6.601	-2.58	-8.437	-8.302	-7.669	-8.885	-8.73	-8.576	-8.296	down	down	down	down	down	down	down	down	down	down	down	down	down	down
Q9U2G6	CELE_Y43F8A.2	Uncharacterized protein	-4.389	-3.662	-3.475	-3.75	-3.893	-2.822	-2.12	-4.519	-4.021	-3.639	-4.999	-4.079	-3.982	-4.292	down	down	down	down	down	down	down	down	down	down	down	down	down	down
Q20456	hum-4	Heavy chain, Unconventional Myosin	-0.55	-0.228	-0.354	-0.225	-0.438	-0.285	-0.555	-0.561	-0.632	-0.622	-0.437	-0.502	-0.459	-0.652	down		down		down	down	down	down	down	down	down	down	down	down
Q23604	CELE_ZK813.3	Uncharacterized protein	1.212	1.103	0.793	0.839	1.309	0.558	-1.457	0.411	0.889	0.736	1.391	0.827	1.286	1.127	up	up	up	up	up		down		up		up		up	up
O17785	CELE_F11A5.9	MFS domain-containing protein	0.923	0.026	0.814	0.667	0.752	0.494	1.77	1.27	2.158	1.802	1.351	1.685	0.299	0.886							up	up	up	up	up	up
H2KYP2	ncx-2	Na_Ca_ex domain-containing protein	-0.893	-0.53	-1.071	-1.025	-1.058	-0.933	-0.661	-0.951	-0.912	-1.169	-0.955	-0.894	-0.938	-0.855	down	down	down	down	down	down	down	down	down	down	down	down	down	down
G5EE37	icp-1	INCENP_ARK-bind domain-containing protein	1.738	1.429	2.255	2.138	1.949	2.202	0.942	0.865	0.957	1.208	1.034	1.094	1.716	1.536	up	up	up	up	up	up	up	up	up	up	up	up	up	up
Q9XW68	CELE_Y75B8A.14	GPN-loop GTPase 3	-1.222	-1.051	-0.986	-1.04	-0.817	-0.912	-0.664	-1.008	-1.001	-1.051	-0.871	-0.872	-1.182	-1.234	down	down	down	down	down	down	down	down	down	down	down	down	down	down
Q9XWA6	CELE_Y113G7C.1	Protein-tyrosine-phosphatase	-1.805	-1.495	-1.244	-1.364	-1.179	-1.155	-2.039	-2.318	-1.762	-1.205	-1.994	-1.98	-2.405	-1.973	down	down	down	down	down	down	down	down	down		down	down	down	down
Q27493	rpoa-2	DNA-directed RNA polymerase subunit beta	-1.508	-1.799	-1.691	-1.663	-1.658	-1.773	-0.653	-1.056	-1.399	-1.344	-1.731	-1.56	-1.704	-1.57	down	down	down	down	down	down	down	down	down	down	down	down	down	down
H2KYN3	acdh-13	Acyl CoA DeHydrogenase	-1.086	-1.126	-1.228	-1.342	-1.207	-1.497	-0.644	-0.867	-0.961	-0.746	-1.198	-1.136	-1.534	-0.993	down	down	down	down	down	down	down	down	down	down	down	down	down	down
P27253	scpA	Methylmalonyl-CoA mutase	3.104	3.484	3.914	3.746	3.819	3.027	2.19	3.62	4.953	5.381	4.265	4.799	3.571	4.149	up	up	up	up	up	up	up	up	up	up	up	up	up	up
Q22524;Q9XW39	CELE_T16A9.5	Uncharacterized protein	-6.589	-5.669	-5.714	-5.696	-5.457	-4.74	-2.578	-6.718	-6.629	-6.48	-6.718	-6.377	-7.112	-5.985	down	down	down	down	down	down	down	down	down	down	down	down	down	down
Q22782	rab-6.2	Ras-related protein rab-6.2	-1.48	-1.477	-2.388	-2.147	-2.446	-2.038	-1.33	-1.515	-1.418	-1.091	-1.2	-1.111	-1.312	-1.149	down	down	down	down	down	down	down	down	down	down	down	down	down	down
G5EDL3	air-1	Aurora kinase	1.136	0.977	1.337	1.316	1.341	1.346	0.846	0.783	0.868	0.675	1.016	0.618	1.285	1.293	up	up	up	up	up	up	up	up	up	up	up	up	up	up
O02218	lid-1	Abhydrolase domain-containing protein lid-1	0.508	0.771	0.371	0.314	0.328	0.208	0.518	0.488	0.559	0.69	0.584	0.66	0.683	0.825	up	up	up	up	up		up	up	up	up	up	up	up	up
P48458	C06A1.3	Putative serine/threonine-protein phosphatase C06A1.3	-2.433	-2.72	-1.566	-1.702	-1.726	-1.147	-1.82	-2.324	-2.696	-2.885	-1.364	-2.346	-2.212	-2.403	down	down	down	down	down	down	down	down	down	down	down	down	down	down
Q17825	C08F8.6	Protein kinase domain-containing protein	-2.995	-2.324	-2.133	-2.21	-2.422	-1.791	-1.985	-3.171	-3.904	-3.404	-2.92	-3.24	-3.024	-2.858	down	down	down	down	down	down	down	down	down	down	down	down	down	down
Q9N5C0	CELE_W06H8.2	Oxidored_FMN domain-containing protein	-2.362	-2.178	-2.465	-2.764	-2.797	-2.56	-1.141	-1.341	-1.684	-1.31	-1.907	-2.061	-2.155	-2.327	down	down	down	down	down	down	down	down	down	down	down	down	down	down
H2KYP1	lntl-1	LIN-24 (Twenty-four) Like	-0.117	0.008	0.361	0.531	0.835	0.918	-1.007	-1.047	-0.941	-0.511	-0.687	-0.456	-0.534	-0.378				up	up	up	down	down	down		down
Q20010	sas-5	Spindle assembly abnormal protein 5	1.847	2.049	2.624	2.657	2.705	2.413	1.718	1.693	1.962	1.993	2.123	1.726	1.872	2.195	up	up	up	up	up	up	up	up	up	up	up	up	up	up
P34499	ttr-3	Transthyretin-like protein 3	1.659	1.442	1.952	2.011	2.431	1.668	-1.49	-0.897	-0.184	-0.12	0.77	0.292	1.644	1.755	up	up	up	up	up	up	down						up	up
B5BM47	CELE_T03D8.6	Uncharacterized protein	0.789	0.592	0.655	0.785	0.644	0.775	-0.725	-0.554	-0.029	-0.082	0.193	0.165	0.778	0.572	up	up	up	up	up	up	down	down					up	up
Q23312	rps-7	40S ribosomal protein S7	-2.974	-3.265	-3.422	-3.179	-3.673	-3.332	-1.07	-2.125	-2.421	-2.831	-2.835	-2.967	-2.772	-2.877	down	down	down	down	down	down	down	down	down	down	down	down	down	down
Q9TYL9	copb-1	Coatomer subunit beta	-0.797	-0.893	-0.86	-0.901	-0.696	-0.755	-0.431	-0.538	-0.732	-0.686	-0.886	-0.868	-0.905	-0.844	down	down	down	down	down	down	down	down	down	down	down	down	down	down
P34673	fahd-1	Fumarylacetoacetate hydrolase domain-containing protein 1	-1.183	-0.857	-1.213	-1.565	-1.317	-1.305	-0.82	-1.298	-1.269	-1.148	-0.749	-0.621	-1.072	-1.334	down	down	down	down	down	down	down	down	down	down	down	down	down	down
Q23593	inx-8	Innexin-8	1.372	1.481	1.138	1.123	1.395	0.949	0.949	1.152	1.554	2.038	1.908	1.362	1.814	1.678	up	up	up	up	up	up	up	up	up	up	up	up	up	up
Q9XUG9	nkb-2	Na+/K+ ATPase, Beta subunit	-2.257	-1.887	-0.899	-0.48	-1.13	-1.082	-1.796	-1.803	-1.713	-1.732	-1.72	-2.267	-1.955	-1.37	down	down			down	down	down	down	down	down	down	down	down	down
Q20752	stc-1	Heat shock 70 kDa protein 13	-0.994	-0.959	-1.005	-0.99	-0.918	-0.905	-0.512	-0.398	-0.54	-0.778	-0.721	-0.786	-0.952	-1.05	down	down	down	down	down	down	down	down	down	down	down	down	down	down
Q9N595	elpc-1	Elongator complex protein 1	-0.343	-0.453	-0.454	-0.343	-0.271	-0.277	-0.445	-0.718	-0.69	-0.747	-0.682	-0.592	-0.721	-0.532	down	down	down	down	down	down	down	down	down	down	down	down	down	down
Q22483	mrps-18.c	Mitochondrial Ribosomal Protein, Small	-1.708	-2.256	-1.178	-1.29	-1.143	-1.346	-0.852	-1.249	-1.147	-1.078	-1.628	-1.414	-1.755	-1.285	down	down	down	down	down	down	down	down	down	down	down	down	down	down
G5EES3	alg-1	Protein argonaute	-0.968	-0.88	-0.634	-0.728	-0.806	-0.537	-0.616	-0.914	-1.018	-0.935	-1.018	-1.096	-0.792	-1.128	down	down	down	down	down	down	down	down	down	down	down	down	down	down
A5JYX8	nra-2	Nicalin	-1.104	-1.121	-1.003	-0.937	-0.995	-0.861	-0.541	-0.692	-0.769	-0.91	-1.059	-1.118	-1.072	-1.191	down	down	down	down	down	down	down	down	down	down	down	down	down	down
P90920	egg-6	Leucine-rich repeat-containing protein egg-6	0.532	0.475	0.766	1.129	0.843	0.458	0.96	0.861	0.709	0.986	0.788	0.546	0.583	1.02			up	up	up		up	up	up	up	up			up
C6KRH9	CELE_F38B2.6	Uncharacterized protein	-2.562	-2.948	-2.56	-2.582	-2.497	-2.592	-1.724	-3.108	-3.66	-2.693	-3.365	-2.856	-3.23	-3.078	down	down	down	down	down	down	down	down	down	down	down	down	down	down
P0A7L3	rplT	Large ribosomal subunit protein bL20	-2.65	0.454	-1.588	-1.685	-1.498	-1.666	-2.934	-2.119	-1.553	-2.892	-1.435	-1.432	-0.885	-2.38	down		down	down	down	down	down	down		down				down
Q95XG1	CELE_Y69A2AR.1	Uncharacterized protein	0.531	0.204	0.428	0.441	0.466	0.619	0.629	0.373	0.309	0.278	0.207	0.025	0.562	0.64	up		up	up	up	up	up						up	up
G5ECF4	bmk-1	Kinesin-like protein	0.601	0.503	1.064	1.062	1.034	1.052	0.522	0.463	0.449	0.513	0.38	0.429	0.672	0.816	up	up	up	up	up	up	up	up	up	up	up	up	up	up
P48152	rps-3	40S ribosomal protein S3	-1.83	-1.932	-1.606	-1.495	-1.536	-1.543	-0.641	-1.142	-1.595	-1.721	-1.779	-1.667	-1.93	-1.915	down	down	down	down	down	down	down	down	down	down	down	down	down	down
Q17532	fask-1	FASt (FAST) Kinase related	-1.043	-0.925	-0.889	-0.974	-1.064	-0.982	-0.805	-0.89	-1.061	-0.767	-1.026	-0.852	-1.268	-0.955	down	down	down	down	down	down	down	down	down	down	down	down	down	down
Q03577	dars-1	Aspartate--tRNA ligase, cytoplasmic	-0.621	-0.644	-0.47	-0.385	-0.434	-0.339	-0.378	-0.572	-0.652	-0.658	-0.608	-0.737	-0.815	-0.672	down	down	down	down	down	down	down	down	down	down	down	down	down	down
Q21770	wago-1	Argonaute protein wago-1	0.306	0.05	-0.063	-0.006	-0.169	-0.209	0.633	0.548	0.375	0.39	0.461	0.431	0.116	0.358							up	up	up		up	up
G5EF32	npa-1	Nematode Polyprotein Allergen related	-0.56	0.203	-0.222	-0.389	-0.374	-0.249	-0.867	-0.816	-0.585	-0.486	-0.249	-0.13	-0.434	-0.481							down	down	down
H2L0C9	ugt-29	Glucuronosyltransferase	-2.096	-1.924	-2.186	-2.109	-2.246	-1.97	-0.829	-1.122	-1.395	-1.313	-1.789	-1.788	-1.818	-2.1	down	down	down	down	down	down	down	down	down	down	down	down	down	down
O16927	F25G6.8	Signal recognition particle 14 kDa protein	-1.519	-1.576	-2.127	-2.144	-2.158	-2.11	-0.642	-0.814	-0.899	-1.057	-1.173	-1.395	-1.289	-1.332	down	down	down	down	down	down	down	down	down	down	down	down	down	down
Q18553	C39H7.1	Protein kinase domain-containing protein	-3.195	-4.416	-3.435	-3.914	-3.646	-2.482	-2.287	-4.546	-3.921	-4.099	-4.22	-4.42	-3.085	-3.727	down	down	down	down	down	down	down	down	down	down	down	down	down	down
P48150	rps-14	40S ribosomal protein S14	-1.629	-1.73	-1.45	-1.252	-1.375	-1.38	-0.656	-1.148	-1.583	-1.72	-1.502	-1.878	-1.678	-1.628	down	down	down	down	down	down	down	down	down	down	down	down	down	down
O61521	CELE_F17E9.5	Uncharacterized protein	-6.457	-5.588	-6.254	-5.87	-6.011	-5.29	-2.353	-6.214	-6.812	-5.711	-6.46	-6.241	-6.505	-6.553	down	down	down	down	down	down	down	down	down	down	down	down	down	down
Q9TZM9	tag-343	RNA polymerase II-associated factor 1 homolog	-0.373	0.07	0.471	0.474	0.478	0.64	-0.59	-0.901	-0.569	-0.454	-0.468	-0.359	-0.312	-0.236			up	up	up	up	down	down	down	down	down
P02925	rbsB	Ribose import binding protein RbsB	-1.129	2.154	-0.521	0.33	-0.27	-0.291	-3.864	-1.446	-0.45	-1.038	0.665	0.577	0.765	-1.667							down
Q9N537	szy-2	Suppressor of ZYg-1	0.804	0.646	1.077	1.011	0.904	0.949	0.524	0.738	0.909	1.017	0.793	0.75	0.766	0.927	up	up	up	up	up	up	up	up	up	up	up	up	up	up
P34646	ZK512.8	Uncharacterized protein ZK512.8	-2.717	-2.998	-2.277	-2.178	-2.256	-1.938	-1.888	-3.016	-3.373	-3.245	-3.157	-2.318	-3.024	-3.815	down	down	down	down	down	down	down	down	down	down	down	down	down	down
O01556;Q9TY27	CELE_F47B3.7	Tyrosine-protein phosphatase;Uncharacterized protein	-1.384	-1.477	-1.153	-0.735	-0.785	-0.876	-1.945	-2.539	-2.047	-0.517	-2.238	-0.589	-1.43	-2.196	down	down	down				down	down	down		down		down	down
Q09373	fzy-1	WD repeat-containing protein fzy-1	0.293	0.602	0.435	0.828	0.586	0.815	1.143	0.504	-0.071	0.271	-0.141	-0.79	0.495	0.267				up	up	up	up					down
Q09591	mix-1	Mitotic chromosome and X-chromosome-associated protein mix-1	1.271	1.08	1.72	1.715	1.695	1.719	0.484	0.712	0.802	0.956	0.929	0.869	1.176	1.29	up	up	up	up	up	up	up	up	up	up	up	up	up	up
P47991	rpl-6	60S ribosomal protein L6	-1.547	-1.818	-1.358	-1.372	-1.372	-1.576	-0.551	-0.877	-1.198	-1.027	-1.635	-1.49	-1.777	-1.493	down	down	down	down	down	down	down	down	down	down	down	down	down	down
G5ECM6	tufm-1	Elongation factor Tu, mitochondrial	-0.657	-0.702	-0.803	-0.849	-0.735	-0.845	-0.418	-0.533	-0.616	-0.497	-0.562	-0.603	-0.757	-0.639	down	down	down	down	down	down	down	down	down	down	down	down	down	down
P50140	hsp-60	Chaperonin homolog Hsp-60, mitochondrial	-0.769	-0.835	-0.5	-0.474	-0.498	-0.69	-0.506	-0.614	-0.61	-0.526	-0.694	-0.593	-0.827	-0.577	down	down	down	down	down	down	down	down	down	down	down	down	down	down
O45988	CELE_ZK1037.6	CUB_2 domain-containing protein	0.244	0.214	1.086	1.164	1.384	1.148	-2.034	-1.366	-0.821	-1.74	-0.056	0.361	-0.248	0.547			up	up	up	up	down	down		down
Q21624	cor-1	Coronin-like protein cor-1	-0.372	-0.487	-0.517	-0.592	-0.587	-0.647	-0.621	-0.62	-0.663	-0.355	-0.621	-0.476	-0.455	-0.519		down	down	down	down	down	down	down	down		down	down	down	down
Q23546	CELE_ZK596.2	Protein kinase domain-containing protein	-2.96	-2.474	-2.344	-2.18	-2.436	-1.825	-1.882	-2.661	-2.47	-1.721	-3.178	-2.495	-2.866	-2.988	down	down	down	down	down	down	down	down	down	down	down	down	down	down
Q17490	unc-44	Uncharacterized protein	0.134	0.228	0.397	0.529	0.473	0.622	-0.449	-0.486	-0.435	-0.369	-0.195	-0.093	0.114	0.008			up	up	up	up	down	down	down	down
D1MN80	ech-2	Enoyl-CoA Hydratase	-0.749	-0.771	-0.578	-0.498	-0.557	-0.669	-0.438	-0.439	-0.456	-0.285	-0.512	-0.568	-0.751	-0.569	down	down	down	down	down	down	down	down	down		down	down	down	down
H2KYU0	acdh-2	Acyl CoA DeHydrogenase	0.812	0.549	0.323	0.417	0.39	0.783	1.729	1.491	1.573	1.875	1.136	0.892	1.452	1.169							up	up	up	up	up		up
Q20089	ttr-20	TransThyretin-Related family domain	0.169	-0.944	-1.315	-0.916	-0.639	-1.024	-2.88	-1.162	-0.441	-0.967	-0.145	-0.4	0.32	-0.194							down
Q23591	CELE_ZK792.5	Uncharacterized protein	-1.36	-1.586	-1.424	-1.501	-1.357	-1.469	-0.711	-1.214	-1.449	-1.643	-1.403	-1.472	-1.487	-1.5	down	down	down	down	down	down	down	down	down	down	down	down	down	down
A0A2C9C3A0	C18C4.7	Uncharacterized protein	-0.243	-0.347	-0.014	0.008	0.014	0.033	-0.508	-0.364	-0.221	-0.506	-0.171	-0.14	-0.176	-0.452		down					down	down		down				down
Q93573	tct-1	Translationally-controlled tumor protein homolog	-1.258	-1.371	-1.605	-1.5	-1.61	-1.65	-0.411	-0.745	-0.902	-1.034	-0.965	-1.207	-1.304	-1.173	down	down	down	down	down	down	down	down	down	down	down	down	down	down
O45114	col-103	Col_cuticle_N domain-containing protein	-0.436	-0.443	-0.692	-0.636	-0.046	-0.336	-2.035	-1.513	-1.362	-0.421	-1.585	-1.305	-0.169	-0.552							down	down	down		down	down
O62289	ttr-51	TransThyretin-Related family domain	2.944	2.902	3.308	3.332	3.42	3.629	-1.377	-0.638	0.346	0.603	1.178	1.869	1.959	2.827	up	up	up	up	up	up	down				up	up	up	up
P69776	lpp	Major outer membrane lipoprotein Lpp	-1.978	1.901	-0.011	0.77	0.308	0.194	-3.298	-1.777	-1.604	-1.612	-0.614	0.058	-0.549	-0.846							down
Q17648	C05C12.5	Uncharacterized protein	-2.244	-2.636	-2.786	-2.03	-2.397	-1.743	-1.997	-2.633	-2.622	-2.153	-4.031	-2.15	-2.618	-2.806	down	down	down	down	down	down	down	down	down	down	down	down	down	down
Q9GPA0	uggt-1	UDP-Glucose Glycoprotein glucosylTransferase	-0.838	-0.902	-0.845	-0.835	-0.93	-0.981	-0.333	-0.29	-0.46	-0.429	-0.604	-0.761	-0.593	-0.819	down	down	down	down	down	down	down	down	down	down	down	down	down	down
Q17624	arrd-25	Arrestin_C domain-containing protein	0.1	-0.03	0.098	0.319	0.183	0.469	-0.666	-0.796	-0.864	-0.619	-0.507	-0.166	-0.381	-0.247						up	down	down	down	down	down
Q21083	mrpl-10	Mitochondrial Ribosomal Protein, Large	-1.108	-1.094	-1.121	-1.031	-1.144	-0.984	-0.68	-0.734	-0.795	-0.791	-1.186	-1.059	-1.178	-1.142	down	down	down	down	down	down	down	down	down	down	down	down	down	down
Q21126	meg-1	Protein meg-1	1.122	0.659	1.465	1.45	0.731	0.799	1.93	1.714	2.023	1.646	1.596	1.79	1.389	1.717			up	up			up	up	up	up	up	up	up	up
Q965J8	CELE_M70.3	WSN domain-containing protein	-3.356	-2.794	-1.941	-2.256	-2.016	-2.206	-1.937	-3.154	-2.683	-2.507	-2.861	-2.205	-1.803	-2.948	down	down	down	down	down	down	down	down	down	down	down	down	down	down
A0A486WWC6	CELE_Y37E3.17	Uncharacterized protein	-0.225	-0.348	-0.324	-0.389	-0.286	-0.358	-0.291	-0.355	-0.23	-0.143	-0.189	-0.229	-0.342	-0.314	down	down	down	down	down	down	down	down	down		down	down	down	down
A0A131MBP8	CELE_T20D4.3	Uncharacterized protein	-2.751	-2.45	-2.134	-2.37	-2.584	-1.715	-1.827	-2.448	-1.913	-2.108	-1.816	-2.308	-1.823	-1.917	down	down	down	down	down	down	down	down	down	down	down	down	down	down
O62431	qars-1	Probable glutamine--tRNA ligase	-0.766	-0.795	-0.75	-0.732	-0.772	-0.744	-0.393	-0.558	-0.789	-0.721	-0.777	-0.8	-0.877	-0.82	down	down	down	down	down	down	down	down	down	down	down	down	down	down
Q23382	ccdc-47	Coiled-coil domain-containing protein 47	-0.486	-0.64	-0.402	-0.213	-0.279	-0.236	-0.46	-0.541	-0.643	-0.394	-0.591	-0.629	-0.399	-0.63	down	down	down		down	down	down	down	down	down	down	down	down	down
Q22169	trap-2	Translocon-associated protein subunit beta	-1.726	-1.812	-2.152	-2.364	-2.163	-2.097	-0.618	-0.945	-1.153	-1.254	-1.665	-1.525	-1.556	-1.84	down	down	down	down	down	down	down	down	down	down	down	down	down	down
Q20330	ifo-1	Intermediate Filament Organize	-1.076	-0.688	-0.886	-0.784	-0.707	-0.711	-0.654	-0.921	-1.123	-1.078	-1.065	-0.697	-1.079	-1.094	down	down	down	down	down	down	down	down	down	down	down	down	down	down
A0A2C9C3E8	unc-68	Uncharacterized protein	-0.757	-0.838	-0.466	-0.369	-0.371	-0.238	-0.599	-0.875	-0.863	-0.675	-1.1	-0.682	-0.833	-0.857	down	down	down	down	down		down	down	down	down	down	down	down	down
Q9NAP9	mrps-15	28S ribosomal protein S15, mitochondrial	-0.63	-0.712	-0.7	-0.648	-0.614	-0.833	-0.477	-0.382	-0.216	-0.257	-0.377	-0.303	-0.554	-0.434	down	down	down	down	down	down	down	down			down		down	down
Q22478	CELE_T14B4.5	Uncharacterized protein	-2.364	-2.477	-1.537	-1.951	-1.714	-1.856	-1.787	-1.715	-1.333	-1.687	-1.525	-1.864	-1.364	-1.968	down	down	down	down	down	down	down	down	down	down	down	down	down	down
Q93240	C17G1.2	Uncharacterized protein	2.154	2.284	1.749	1.702	2.086	1.653	0.888	1.59	1.375	1.735	1.635	1.939	1.859	2.129	up	up	up	up	up	up	up	up	up	up	up	up	up	up
P54889	alh-13	Probable delta-1-pyrroline-5-carboxylate synthase	-3.488	-3.682	-4.052	-4.38	-4.445	-4.317	-0.913	-0.836	-1.113	-1.229	-1.623	-1.877	-2.86	-3.577	down	down	down	down	down	down	down	down	down	down	down	down	down	down
Q9TXM6	CELE_F52D2.7	Uncharacterized protein	0.514	0.647	1.707	1.843	1.795	2.212	2.065	1.998	1.232	1.687	0.605	1.117	1.114	0.23			up	up	up	up	up	up		up
P90829	F10C2.4	DNA polymerase delta catalytic subunit	0.852	0.811	1.111	1.112	1.03	1.226	0.537	0.407	0.436	0.723	0.656	0.324	1.069	0.954	up	up	up	up	up	up	up	up	up	up	up		up	up
Q09665	tnc-2	Troponin C, isoform 2	-1.982	-1.735	-1.491	-1.364	-1.513	-1.112	-1.056	-1.623	-1.983	-1.573	-1.952	-1.572	-2.268	-1.952	down	down	down	down	down	down	down	down	down	down	down	down	down	down
O18307	CELE_ZK909.3	HD domain-containing protein	-0.999	-1.173	-1.229	-1.048	-1.029	-0.851	-0.939	-1.121	-1.571	-1.411	-1.29	-1.69	-1.169	-1.528	down	down	down	down	down	down	down	down	down	down	down	down	down	down
Q17598	C03A3.2	Transmembrane protein 104 homolog	-2.475	-2.499	-3.686	-3.327	-3.785	-3.174	-2.877	-2.87	-4.275	-3.85	-2.342	-2.474	-3.118	-3.509	down	down	down	down	down	down	down	down	down	down	down	down	down	down
O16785	pat-6	Paralyzed arrest at two-fold protein 6	-0.996	-1.075	-0.475	-0.442	-0.624	-0.315	-0.74	-1.122	-1.268	-0.875	-1.32	-0.947	-1.1	-1.123	down	down	down	down	down		down	down	down	down	down	down	down	down
Q9N3T8	msh-6	DNA mismatch repair protein	0.922	0.849	1.041	1.03	1.007	1.005	0.512	0.705	0.837	0.948	0.934	0.644	0.893	1.097	up	up	up	up	up	up	up	up	up	up	up	up	up	up
Q9BL07	Y54F10AM.8	Putative phospholipase B-like 3	-1.827	-1.57	-2.173	-2.085	-2.355	-1.967	-1.116	-1.276	-1.277	-1.368	-1.103	-0.892	-1.278	-1.764	down	down	down	down	down	down	down	down	down	down	down	down	down	down
H2KYE0	nra-4	Nicotinic receptor-associated protein 4	-0.919	-0.989	-0.916	-0.858	-0.924	-0.878	-0.385	-0.461	-0.697	-0.672	-0.806	-0.844	-0.803	-0.948	down	down	down	down	down	down	down	down	down	down	down	down	down	down
Q9XWP0	mrps-28	Mitochondrial Ribosomal Protein, Small	-0.836	-1.31	-1.115	-1.164	-1.076	-1.202	-0.49	-0.672	-0.804	-0.819	-0.898	-0.975	-1.271	-1.126	down	down	down	down	down	down	down	down	down	down	down	down	down	down
Q17750	ufl-1	E3 UFM1-protein ligase 1 homolog	-0.944	-0.921	-0.859	-0.793	-0.854	-0.764	-0.573	-0.666	-0.644	-1.029	-0.631	-0.755	-0.923	-1.078	down	down	down	down	down	down	down	down	down	down	down	down	down	down
Q9TZC4	pat-4	Integrin-linked protein kinase homolog pat-4	-0.209	0.055	-0.008	0.088	0.161	0.36	-0.531	-0.62	-0.66	-0.701	-0.53	-0.296	-0.357	-0.373						up	down	down	down	down	down			down
Q20719	F53F4.10	Probable NADH dehydrogenase [ubiquinone] flavoprotein 2, mitochondrial	-1.344	-1.551	-1.888	-1.992	-1.86	-1.958	-0.493	-0.712	-1.015	-1.21	-1.051	-1.28	-1.464	-1.495	down	down	down	down	down	down	down	down	down	down	down	down	down	down
P19625	mlc-1	Myosin regulatory light chain 1	-0.775	-0.758	-1.182	-1.165	-1.321	-1.305	-0.494	-0.71	-0.654	-0.589	-0.583	-0.559	-0.87	-0.808	down	down	down	down	down	down	down	down	down	down	down	down	down	down
Q22067	got-1.2	Aspartate aminotransferase, cytoplasmic	-1.509	-1.534	-2.155	-2.245	-2.178	-2.166	-0.598	-0.753	-1.116	-1.018	-1.164	-1.178	-1.54	-1.645	down	down	down	down	down	down	down	down	down	down	down	down	down	down
Q19421	CELE_F13G3.6	Glyco_trans_2-like domain-containing protein	1.116	1.216	1.126	1.136	1.283	0.973	0.695	0.953	1.245	1.594	1.243	1.377	1.24	1.296	up	up	up	up	up	up	up	up	up	up	up	up	up	up
O18211	mop-25.2	MO25-like protein 2	0.366	0.36	0.626	0.52	0.408	0.459	0.46	0.42	0.315	0.392	0.531	0.16	0.452	0.455	up	up	up	up	up	up	up	up	up	up	up		up	up
Q93513;Q9XVC4	CELE_F15D4.5	Uncharacterized protein	-1.37	-0.5	-1.06	-0.345	-0.68	-0.716	-1.744	-1.213	-1.896	-1.08	-2.145	-0.852	-1.003	-1.536	down		down				down	down	down		down			down
Q18136	cal-5	CALmodulin related genes	-1.952	-1.525	-2.202	-2.106	-2.367	-2.396	-1.212	-1.628	-1.767	-1.506	-1.455	-1.833	-2.135	-2.385	down	down	down	down	down	down	down	down	down	down	down	down	down	down
A0A486WY26	CELE_F56C9.10	Uncharacterized protein	-0.761	-0.83	-0.591	-0.595	-0.708	-0.696	0.452	0.125	-0.163	-0.172	-0.12	-0.419	-0.438	-0.226	down	down	down	down	down	down	up					down	down
Q7YTJ3	CELE_Y37D8A.25	PH domain-containing protein	-1.938	-2.866	-1.222	-1.007	-0.877	-1.04	-1.847	-2.329	-2.12	-2.462	-3.026	-1.935	-2.182	-2.419	down	down	down	down		down	down	down	down	down	down	down	down	down
P50880	rpl-3	60S ribosomal protein L3	-1.335	-1.635	-1.01	-0.947	-1.038	-1.182	-0.485	-0.8	-0.969	-1.093	-1.324	-1.202	-1.484	-1.292	down	down	down	down	down	down	down	down	down	down	down	down	down	down
G5EDU3	pld-1	Phospholipase	-0.225	-0.197	-0.059	-0.143	-0.097	-0.073	-0.458	-0.481	-0.382	-0.315	-0.226	-0.157	-0.259	-0.177							down	down	down
Q8WTL6	hpo-29	Uncharacterized protein	-0.947	-0.976	-1.08	-1.086	-1.056	-1.072	-0.431	-0.588	-0.676	-0.748	-0.833	-0.994	-1.011	-0.965	down	down	down	down	down	down	down	down	down	down	down	down	down	down
Q9U2A6	efhd-1	EF HanD calcium binding protein	0.652	0.473	0.792	0.839	0.752	1.1	-0.62	-0.543	-0.275	-0.441	-0.352	-0.171	0.451	0.29	up	up	up	up	up	up	down	down		down			up
Q9N3Y1	CELE_Y42H9AR.1	GRASP55_65 domain-containing protein	-0.925	-1.09	-0.84	-0.81	-0.798	-0.722	-0.578	-0.828	-0.796	-0.999	-0.754	-0.875	-0.704	-1.035	down	down	down	down	down	down	down	down	down	down	down	down	down	down
G5EC23	hcf-1	Host cell factor homolog hcf-1	1.008	0.836	1.242	1.207	1.338	1.58	0.498	0.432	0.314	0.374	0.38	0.308	1.038	0.817	up	up	up	up	up	up	up	up	up	up	up		up	up
H2FLM4	nlp-56	Neuropeptide-Like Protein	-0.122	0.564	0.498	0.975	0.272	0.574	1.683	1.823	1.077	1.317	0.597	0.034	0.655	0.888				up			up	up	up	up
Q95XJ5	CELE_Y45G5AM.7	Uncharacterized protein	0.903	0.829	1.177	1.08	0.796	1.028	0.93	1.039	1.114	1.274	0.934	1.006	0.894	1.23	up	up	up	up	up	up	up	up	up	up	up	up	up	up
Q9NET7	CELE_Y39B6A.10	Uncharacterized protein	0.945	0.715	0.985	1.26	1.113	1.107	0.859	1.048	1.07	0.742	1.059	0.865	0.843	1.112	up	up	up	up	up	up	up	up	up	up	up	up	up	up
P91026;P91497	spch-2	SPerm CHromatin enriched	-4.484	-4.248	-4.199	-4.219	-4.473	-3.376	-2.198	-4.883	-4.553	-4.165	-5.274	-4.697	-4.676	-4.574	down	down	down	down	down	down	down	down	down	down	down	down	down	down
O16883	cpg-4	Chondroitin proteoglycan 4	1.651	1.692	2.029	2.313	2.201	1.987	1.215	1.689	1.236	1.984	1.469	1.814	1.949	1.867	up	up	up	up	up	up	up	up	up	up	up	up	up	up
G5EEX7	CELE_F49C12.15	Uncharacterized protein	-2.394	-1.718	-1.375	-1.509	-1.068	-1.216	-1.91	-1.858	-2.148	-1.605	-2.282	-1.784	-2.036	-2.489	down	down	down	down	down	down	down	down	down	down	down	down	down	down
O61741	nfs-1	Cysteine desulfurase, mitochondrial	-0.14	-0.292	-0.433	-0.403	-0.382	-0.475	-0.404	-0.38	-0.355	-0.357	-0.13	-0.341	-0.276	-0.28		down	down	down	down	down	down	down	down	down		down
Q2EEM8	ttr-45	TransThyretin-Related family domain	1.911	2.304	2.072	1.989	2.545	2.381	-1.537	-1.671	-0.417	0.549	0.898	1.62	1.315	2.18	up	up	up	up	up	up	down	down				up	up	up
P34304	C06E1.9	Uncharacterized protein C06E1.9	-0.348	-0.504	-0.161	-0.138	-0.161	0.016	-0.42	-0.42	-0.381	-0.609	-0.425	-0.476	-0.73	-0.486	down	down					down	down	down	down	down	down	down	down
Q09361;Q09362	ZK1307.3	Uncharacterized protein ZK1307.3;Uncharacterized protein ZK1307.4	-3.812	-4	-3.524	-3.65	-3.357	-2.946	-2.108	-4.15	-4.231	-3.585	-4.269	-4.297	-3.852	-4.198	down	down	down	down	down	down	down	down	down	down	down	down	down	down
G5EFK4	arf-3	ADP-ribosylation factor	-1.286	-1.307	-0.963	-0.888	-0.92	-0.818	-0.534	-0.909	-1.412	-1.626	-1.218	-1.319	-1.396	-1.358	down	down	down	down	down	down	down	down	down	down	down	down	down	down
O61818	mrps-30	Mitochondrial Ribosomal Protein, Small	-0.736	-0.701	-0.819	-0.817	-0.793	-0.954	-0.364	-0.45	-0.448	-0.436	-0.496	-0.526	-0.71	-0.641	down	down	down	down	down	down	down	down	down	down	down	down	down	down
Q09996	lars-1	Leucine--tRNA ligase	-0.706	-0.806	-0.914	-0.874	-0.873	-0.904	-0.371	-0.516	-0.722	-0.711	-0.711	-0.757	-0.782	-0.618	down	down	down	down	down	down	down	down	down	down	down	down	down	down
Q3V5I7	atg-5	Autophagy-related protein 5	0.225	0.217	0.873	0.78	0.702	0.824	0.489	0.337	0.316	0.429	0.507	0.222	0.491	0.308			up	up	up	up	up	up	up	up	up		up
Q21307	mek-1	Dual specificity mitogen-activated protein kinase kinase mek-1	0.537	0.505	0.526	0.702	0.711	0.881	0.58	0.676	0.375	0.24	0.38	0.319	0.555	0.379	up	up	up	up	up	up	up	up	up		up		up
P91532	CELE_W09C3.7	Uncharacterized protein	-1.084	-0.572	-0.116	-0.152	-0.163	-0.028	-1.196	-1.081	-1.135	-0.995	-1.083	-0.999	-0.968	-1.035	down						down	down	down	down	down	down	down	down
Q95X39	mrpl-9	39S ribosomal protein L9, mitochondrial	-1.156	-1.352	-1.704	-1.659	-1.412	-1.515	-0.588	-0.922	-0.997	-0.95	-1.055	-1.304	-1.413	-1.264	down	down	down	down	down	down	down	down	down	down	down	down	down	down
Q9NEW7	elpc-2	Elongator complex protein 2	-1.049	-1.156	-1	-0.909	-0.874	-0.708	-0.615	-0.919	-1.219	-0.801	-1.138	-0.976	-1.171	-0.922	down	down	down	down	down	down	down	down	down	down	down	down	down	down
V6CJ04	bicd-1	Protein bicaudal D homolog	-0.477	-0.377	-0.467	-0.521	-0.433	-0.461	-0.494	-0.471	-0.603	-0.408	-0.369	-0.31	-0.407	-0.631	down	down	down	down	down	down	down	down	down	down	down		down	down
Q18264	tmem-131	TMEM131_like domain-containing protein	-1.085	-1.095	-0.548	-0.339	-0.515	-0.526	-0.82	-1.002	-0.911	-0.951	-1.243	-1.035	-0.853	-0.824	down	down	down		down	down	down	down	down	down	down	down	down	down
P76558	maeB	NADP-dependent malic enzyme	-0.913	0.967	0.685	0.825	0.383	-0.432	-2.296	-0.95	-1.332	0.239	0.161	0.024	0.204	-0.747							down
H2KYJ2	ttr-59	TransThyretin-Related family domain	0.599	0.322	0.595	1.023	0.814	1.125	-0.921	-1.152	-0.458	-0.49	-0.074	0.125	0.525	0.539			up	up	up	up	down	down
H2KZY5	CELE_F47B7.2	Sulfhydryl oxidase	-0.744	-0.765	-0.333	-0.363	-0.428	-0.454	-0.454	-0.698	-0.671	-0.801	-0.512	-0.68	-0.403	-0.652	down	down	down	down	down	down	down	down	down	down	down	down	down	down
A0A3P6PCP8	golg-4	GRIP domain-containing protein	-0.63	-0.688	-0.632	-0.75	-0.646	-0.691	-0.36	-0.329	-0.389	-0.364	-0.363	-0.318	-0.416	-0.65	down	down	down	down	down	down	down	down	down	down	down	down	down	down
Q9XWU8	epg-3	Ectopic P granules protein 3	-0.613	-0.278	-0.021	0.037	-0.029	-0.135	-0.569	-0.584	-0.747	-0.554	-0.611	-0.564	-0.262	-0.352	down						down	down	down	down	down	down
Q965X9	nape-2	N-acyl-phosphatidylethanolamine-hydrolyzing phospholipase D 2	0.052	0.495	0.428	0.627	0.564	0.566	-0.576	-0.369	-0.261	-0.026	-0.132	-0.04	0.176	0.152		up	up	up	up	up	down
H2L0D0	hrpa-2	Heterogeneous nuclear RibonucleoProtein (HnRNP) A homolog	-1.847	-1.633	-1.269	-1.383	-1.246	-1.347	-0.892	-0.962	-1.488	-1.35	-1.57	-1.516	-1.692	-1.543	down	down	down	down	down	down	down	down	down	down	down	down	down	down
Q23091	CELE_ZK742.4	Oxidored_FMN domain-containing protein	0.421	0.425	-0.203	0.022	-0.153	-0.116	-0.868	-0.952	-0.644	-0.44	-0.195	-0.517	-0.254	-0.304							down	down	down
Q9U1Y6	dhs-24	DeHydrogenases, Short chain	-1.605	-1.7	-1.987	-2.028	-1.918	-2.019	-0.679	-1.152	-1.281	-1.5	-1.376	-1.554	-1.732	-1.769	down	down	down	down	down	down	down	down	down	down	down	down	down	down
Q9N590	pfkb-1.1	6-phosphofructo-2-kinase	-0.232	-0.116	0.226	0.373	0.205	0.344	0.425	0.48	0.272	0.226	0.18	0.191	0.027	-0.049				up		up	up	up	up
Q18490	tost-1	Protein tost-1	0.464	0.294	0.363	0.244	0.155	0.187	0.767	0.724	0.697	0.518	0.966	0.439	0.534	0.635							up	up	up		up		up	up
P34525	spcs-3	Signal peptidase complex subunit 3	-1.571	-1.319	-1.527	-1.578	-1.806	-1.408	-1.009	-1.435	-1.542	-1.531	-1.248	-1.466	-1.42	-1.708	down	down	down	down	down	down	down	down	down	down	down	down	down	down
Q9TZF2	chil-24	Glyco_18 domain-containing protein	1.916	1.947	1.677	1.713	1.833	1.554	0.656	1.164	1.505	1.93	1.533	1.837	1.889	1.704	up	up	up	up	up	up	up	up	up	up	up	up	up	up
A0A4V0INE6	pes-8	Patterned Expression Site	-0.115	-0.158	0.431	0.758	0.933	0.819	-0.81	-0.848	-0.839	-0.797	-0.394	-0.453	-0.19	0.011				up	up	up	down	down	down	down
Q9XWP6	spr-5	Probable lysine-specific histone demethylase 1	0.909	0.773	1.385	1.473	1.332	1.654	0.598	0.627	0.703	0.607	0.676	0.523	0.997	0.897	up	up	up	up	up	up	up	up	up	up	up	up	up	up
P28548	kin-10	Casein kinase II subunit beta	0.653	0.685	1.012	0.918	0.91	0.889	-0.954	-1.475	-0.081	-0.5	0.417	0.58	0.526	0.534		up	up	up	up	up	down	down
A0A078BPG0	CELE_F09E10.7	DUF4440 domain-containing protein	-4.319	-4.666	-3.831	-3.6	-2.934	-3.119	-2.305	-5.07	-4.962	-4.569	-4.973	-2.553	-4.264	-4.788	down	down	down	down	down	down	down	down	down	down	down	down	down	down
Q95Y71	mrpl-45	Probable 39S ribosomal protein L45, mitochondrial	-1.272	-1.4	-1.529	-1.56	-1.462	-1.63	-0.608	-0.958	-0.93	-1.011	-0.992	-1.188	-1.303	-1.144	down	down	down	down	down	down	down	down	down	down	down	down	down	down
G5EDD1	ucr-2.1	Ubiquinol-Cytochrome c oxidoReductase complex	-1.684	-1.541	-2.158	-2.279	-2.299	-2.324	-0.607	-0.843	-1.117	-1.037	-1.261	-1.114	-1.622	-1.683	down	down	down	down	down	down	down	down	down	down	down	down	down	down
P90922	hbs-1	Tr-type G domain-containing protein	-0.906	-0.642	-0.64	-0.864	-0.667	-0.699	-0.6	-0.778	-0.805	-0.778	-0.957	-0.838	-1.027	-0.884	down	down	down	down	down	down	down	down	down	down	down	down	down	down
Q9XW78	Y75B8A.31	FAM172 family protein homolog Y75B8A.31	0.678	0.396	0.838	0.855	0.76	0.902	0.535	0.593	0.676	1.033	0.654	0.877	0.59	0.749	up	up	up	up	up	up	up	up	up	up	up	up	up	up
Q9U229	wah-1	Worm AIF (Apoptosis inducing factor) Homolog	-0.255	-0.295	-0.184	-0.137	-0.185	-0.268	-0.308	-0.267	-0.185	-0.073	-0.238	-0.186	-0.453	-0.239	down	down	down		down	down	down	down			down		down	down
Q9U5C1	CELE_F43C11.7	RING-type domain-containing protein	1.155	1.394	1	1.132	1.136	0.963	2.631	2.32	2.493	1.038	1.276	1.451	1.866	0.833							up	up	up				up
Q22397	aat-6	Amino acid transporter protein 6	-3.516	-1.509	-1.951	-2.728	-2.489	-2.597	-1.812	-2.597	-3.089	-3.106	-3.555	-2.563	-2.436	-3.182	down	down	down	down	down	down	down	down	down	down	down	down	down	down
Q19781	CELE_F25E2.3	Uncharacterized protein	1.538	1.808	1.014	0.775	0.811	0.384	0.987	1.249	1.79	1.452	1.828	1.768	1.382	1.416	up	up	up	up	up		up	up	up	up	up	up	up	up
P0ABU2	ychF	Ribosome-binding ATPase YchF	1.115	3.875	1.235	1.62	2.002	1.793	2.996	1.508	2.119	2.037	3.07	2.671	3.294	1.981		up		up	up	up	up		up		up	up	up
Q9N431	CELE_Y38C1AA.7	Uncharacterized protein	-5.118	-5.737	-4.63	-4.887	-4.697	-3.761	-2.136	-5.016	-5.731	-5.437	-5.609	-4.654	-5.636	-5.079	down	down	down	down	down	down	down	down	down	down	down	down	down	down
Q21713	CELE_R04D3.3	Uncharacterized protein	0.841	1.014	1.675	1.867	1.568	1.737	0.746	1.368	1.445	1.261	1.138	0.967	1.201	1.155	up	up	up	up	up	up	up	up	up	up	up	up	up	up
G5EDW8	CELE_VF13D12L.3	Uncharacterized protein	-1.67	-1.473	-1.697	-1.827	-1.873	-1.734	0.414	0.123	-0.166	-0.436	-0.661	-0.852	-1.27	-1.575	down	down	down	down	down	down	up			down	down	down	down	down
Q10953	wrm-1	Armadillo repeat-containing protein wrm-1	1.547	1.232	1.816	2	1.667	1.608	0.977	1.063	0.931	1.097	1.295	0.976	1.479	1.561	up	up	up	up	up	up	up	up	up	up	up	up	up	up
O44512	isp-1	Cytochrome b-c1 complex subunit Rieske, mitochondrial	-0.813	-0.734	-0.647	-0.591	-0.673	-0.726	-0.6	-1.043	-0.87	-0.825	-0.353	-0.469	-0.655	-0.569	down	down	down	down	down	down	down	down	down	down		down	down	down
Q17635	ndc-80	Kinetochore protein ndc-80	1.007	0.869	0.988	1.11	0.898	1.137	0.617	0.578	0.564	0.725	0.647	0.462	0.855	0.778	up	up	up	up	up	up	up	up	up	up	up	up	up	up
Q94269	ctsa-2	Carboxypeptidase	-2.822	-2.224	-2.879	-2.886	-2.79	-2.525	-1.049	-1.7	-2.47	-2.485	-3.1	-2.606	-2.777	-3.286	down	down	down	down	down	down	down	down	down	down	down	down	down	down
O16619	dhs-13	DeHydrogenases, Short chain	-1.394	-1.463	-1.808	-1.688	-1.752	-1.694	-0.594	-0.742	-0.858	-0.536	-1.003	-0.887	-1.195	-1.185	down	down	down	down	down	down	down	down	down	down	down	down	down	down
O01549	mage-1	Melanoma-Associated-antiGEn homolog	0.499	0.743	0.8	0.711	0.744	0.7	0.49	0.433	0.534	0.598	0.456	0.49	0.594	0.872	up	up	up	up	up	up	up	up	up	up	up	up	up	up
Q9N2X8	pqn-89	Prion-like-(Q/N-rich)-domain-bearing protein	-2.392	-2.034	-3.037	-3.452	-2.953	-1.884	-3.512	-3.418	-4.074	-1.86	-3.382	-2.414	-3.196	-3.33			down	down	down		down	down	down		down	down	down	down
P91478	mrrf-1	Ribosome-recycling factor, mitochondrial	-0.687	-0.766	-1.116	-1.064	-0.884	-0.913	-0.632	-0.87	-0.869	-0.528	-0.744	-0.692	-0.88	-0.788	down	down	down	down	down	down	down	down	down	down	down	down	down	down
Q17993	rml-3	L-RhaMnose biosynthetic pathway	-2.958	-4.251	-2.769	-2.958	-3.009	-2.571	-1.492	-2.154	-2.814	-3.336	-3.5	-3.7	-1.99	-3.928	down	down	down	down	down	down	down	down	down	down	down	down	down	down
Q19877	rps-23	40S ribosomal protein S23	-1.814	-2.044	-2.983	-3.043	-3.075	-2.934	-0.716	-1.144	-1.414	-1.345	-1.849	-1.775	-2.004	-1.883	down	down	down	down	down	down	down	down	down	down	down	down	down	down
P48162	rpl-25.1	60S ribosomal protein L23a 1	-3.291	-3.684	-3.153	-3.711	-3.321	-3.474	-1.066	-1.81	-2.604	-1.892	-2.988	-2.625	-3.447	-3.45	down	down	down	down	down	down	down	down	down	down	down	down	down	down
Q8MPS7	CELE_ZK354.2	Protein kinase domain-containing protein	-1.866	-2.683	-1.534	-1.455	-1.435	-1.359	-1.604	-2.546	-1.552	-2.807	-2.641	-1.841	-1.732	-2	down	down	down	down	down	down	down	down	down	down	down	down	down	down
P49391	mrps-14	Probable 40S ribosomal protein S14, mitochondrial	-1.154	-1.47	-0.881	-0.718	-0.841	-1.001	-0.557	-1.042	-1.167	-1.34	-1.226	-1.619	-1.434	-1.47	down	down	down	down	down	down	down	down	down	down	down	down	down	down
Q9GS00	csn-1	COP9 signalosome complex subunit 1	0.685	0.558	0.929	0.92	0.996	0.954	0.357	0.388	0.388	0.551	0.547	0.403	0.599	0.694	up	up	up	up	up	up	up	up	up	up	up	up	up	up
Q9NA83	rol-1	Col_cuticle_N domain-containing protein	-5.966	-5.793	-4.687	-4.642	-4.465	-3.825	-3.415	-7.349	-8.181	-7.94	-6.006	-6.678	-7.905	-6.886	down	down	down	down	down	down	down	down	down	down	down	down	down	down
G5EG18	crn-2	Cell death-related nuclease 2	-0.242	-0.206	-0.135	-0.038	-0.013	0.098	-0.578	-0.68	-0.408	-0.414	-0.386	-0.678	-0.11	-0.319							down	down	down		down	down
G5EGT6	cyp-31a2	CYtochrome P450 family	0.859	0.472	0.741	0.904	0.907	0.698	0.754	1.059	1.312	1.288	1.459	1	0.899	1.198	up		up	up	up	up	up	up	up	up	up	up	up	up
Q20136	ram-2	Col_cuticle_N domain-containing protein	-2.524	-1.967	-1.441	-2.027	-2.152	-2	-2.06	-2.586	-2.664	-2.758	-2.111	-2.233	-2.187	-2.634	down	down	down	down	down	down	down	down	down	down	down	down	down	down
A3FPI6	CELE_K10C2.8	Uncharacterized protein	-0.418	-0.307	-1.291	0.222	-0.942	-2.098	-3.164	-1.312	-1.328	-0.526	-0.376	-0.765	0.372	-0.466						down	down
O61887	rnst-2	Ribonuclease T2 protein rnst-2	0.716	0.705	-0.087	-0.092	-0.146	0.04	-0.724	-0.589	-0.24	-0.066	0.137	0.026	0.759	0.57	up	up					down	down					up	up
Q9N4Y8	nuo-5	NADH-ubiquinone oxidoreductase 75 kDa subunit, mitochondrial	-1.098	-1.23	-1.595	-1.604	-1.617	-1.661	-0.413	-0.633	-0.756	-0.959	-0.813	-0.891	-1.115	-1.199	down	down	down	down	down	down	down	down	down	down	down	down	down	down
Q9N4I4	rpl-1	60S ribosomal protein L10a	-1.375	-1.363	-1.025	-0.983	-1.064	-1.103	-0.546	-0.898	-1.059	-1.23	-1.352	-1.241	-1.328	-1.443	down	down	down	down	down	down	down	down	down	down	down	down	down	down
P34437	F44E2.7	Putative zinc finger protein F44E2.7	1.528	2.003	1.865	1.589	1.577	2.09	1.382	1.237	1.456	1.511	1.499	0.968	1.681	2.091	up	up	up	up	up	up	up	up	up	up	up	up	up	up
Q9XWG2	CELE_Y63D3A.7	NADH dehydrogenase [ubiquinone] 1 alpha subcomplex subunit 2	-2.233	-2.575	-2.159	-1.943	-2.345	-2.239	-0.953	-2.076	-2.195	-2.543	-2.176	-2.057	-2.193	-2.298	down	down	down	down	down	down	down	down	down	down	down	down	down	down
Q22029	CELE_R74.2	Uncharacterized protein	-1.968	-2.727	-0.675	-1.24	-1.375	-0.859	-1.243	-2.1	-2.242	-1.854	-1.433	-1.429	-1.598	-1.958	down	down		down	down	down	down	down	down	down	down	down	down	down
Q09220	B0228.1	Uncharacterized protein B0228.1	-2.165	-2.398	-1.481	-1.351	-1.405	-1.147	-1.426	-2.38	-1.92	-2.043	-2.052	-1.959	-2.378	-1.861	down	down	down	down	down	down	down	down	down	down	down	down	down	down
Q22857	CELE_T28H10.2	ShKT domain-containing protein	-1.53	-1.332	-1.221	-0.947	-0.938	-1.188	-0.85	-1.163	-1.238	-0.958	-1.299	-1.458	-0.938	-1.592	down	down	down	down	down	down	down	down	down	down	down	down	down	down
Q9N5Y2	art-1	Probable very-long-chain enoyl-CoA reductase art-1	-2.288	-2.605	-2.266	-2.326	-2.409	-2.101	-0.626	-0.809	-1.354	-1.157	-2.054	-1.812	-2.191	-2.458	down	down	down	down	down	down	down	down	down	down	down	down	down	down
P91425	guk-1	Guanylate kinase	-0.365	-0.368	-0.053	0.043	-0.024	-0.005	-0.424	-0.65	-0.378	-0.443	-0.591	-0.455	-0.371	-0.426	down	down					down	down	down	down	down	down	down	down
Q95ZT8	CELE_F42A9.7	Major sperm protein	-2.097	-2.095	-1.86	-1.965	-2.073	-1.191	-1.97	-2.7	-3.084	-2.18	-2.989	-2.177	-3.023	-1.98	down	down	down	down	down	down	down	down	down	down	down	down	down	down
Q22561	pgap-1	GPI inositol-deacylase	0.775	0.682	1.435	1.386	1.458	1.467	0.777	0.722	0.505	0.815	0.683	0.902	0.923	0.888	up	up	up	up	up	up	up	up	up	up	up	up	up	up
H2L0A6	CELE_H14E04.2	Uncharacterized protein	0.698	0.647	0.811	0.837	0.904	0.874	0.328	0.202	0.407	0.382	0.589	0.376	0.662	0.733	up	up	up	up	up	up	up		up	up	up	up	up	up
Q27371	mup-2	Troponin T	-0.72	-0.866	-0.889	-0.882	-1.06	-1.274	-0.639	-0.83	-0.777	-0.935	-0.944	-0.757	-1.081	-0.766	down	down	down	down	down	down	down	down	down	down	down	down	down	down
F5GUH2	CELE_W05B5.1	Uncharacterized protein	-0.81	-0.528	-0.134	0.088	-0.028	0.179	-0.885	-1.235	-1.447	-1.335	-1.003	-1.106	-1.01	-0.984	down						down	down	down	down	down	down	down	down
Q19388	CELE_F13D11.3	Uncharacterized protein	-2.497	-1.927	-2.072	-2.787	-2.481	-2.013	-1.654	-1.856	-3.511	-2.485	-1.577	-2.094	-2.224	-2.381	down	down	down	down	down	down	down	down	down	down	down	down	down	down
Q8MXQ7	Y92H12BL.1	Threonylcarbamoyladenosine tRNA methylthiotransferase	-0.464	-0.672	-0.42	-0.487	-0.309	-0.561	-0.334	-0.368	-0.379	-0.164	-0.353	-0.468	-0.637	-0.466	down	down	down	down	down	down	down	down	down		down	down	down	down
P51403	rps-2	40S ribosomal protein S2	-1.727	-1.743	-1.821	-1.807	-1.641	-1.673	-0.525	-1.026	-1.301	-1.458	-1.635	-1.545	-1.832	-1.647	down	down	down	down	down	down	down	down	down	down	down	down	down	down
A6ZJ46	CELE_F49E2.2	SH3 domain-containing protein	0.223	0.555	0.128	0.431	0.238	0.51	-0.479	-0.471	-0.344	-0.342	-0.05	0.096	0.212	0.167		up		up		up	down	down	down
P49197	rps-21	40S ribosomal protein S21	-1.272	-1.719	-1.626	-1.43	-1.647	-1.634	-0.843	-1.244	-1.598	-2.312	-1.425	-1.573	-1.597	-1.382	down	down	down	down	down	down	down	down	down	down	down	down	down	down
Q2L6Y6	hsp-75	HATPase_c domain-containing protein	-0.698	-0.674	-0.381	-0.337	-0.308	-0.469	-0.364	-0.526	-0.397	-0.443	-0.467	-0.555	-0.711	-0.635	down	down	down	down	down	down	down	down	down	down	down	down	down	down
Q9NA57	CELE_Y73F8A.15	Uncharacterized protein	-1.059	-1.205	-1.07	-0.474	-0.482	-0.989	-1.563	-1.913	-1.832	-1.259	-1.844	-1.028	-1.034	-0.893		down	down			down	down	down	down	down	down
A5PEW5	ric-4	Synaptosomal-associated protein	-0.761	-0.661	-0.86	-0.822	-0.674	-0.431	-0.898	-0.827	-1.071	-0.729	-1.106	-0.825	-0.953	-0.788	down	down	down	down	down		down	down	down	down	down	down	down	down
O62337	CELE_R06C1.4	RRM domain-containing protein	-3.464	-3.569	-3.537	-3.368	-3.468	-3.073	-1.409	-2.319	-2.872	-3.838	-3.516	-3.261	-3.573	-4.165	down	down	down	down	down	down	down	down	down	down	down	down	down	down
Q9TYU5	mys-1	Histone acetyltransferase Tip60 homolog	2.284	1.761	2.238	1.909	2.035	2.354	1.6	1.473	1.476	0.78	0.866	0.629	2.522	1.959	up	up	up	up	up	up	up	up	up				up	up
P41877	isw-1	Chromatin-remodeling complex ATPase chain isw-1	1.154	0.957	1.282	1.326	1.255	1.722	0.54	0.59	0.482	0.532	0.544	0.468	1.082	1.036	up	up	up	up	up	up	up	up	up	up	up	up	up	up
O45713	rbm-3.2	RRM domain-containing protein	-1.806	-2.166	-1.503	-1.398	-1.647	-1.348	-0.734	-1.225	-1.488	-1.809	-1.82	-1.798	-2.045	-1.944	down	down	down	down	down	down	down	down	down	down	down	down	down	down
P17140	let-2	Collagen alpha-2(IV) chain	-1.097	-0.59	-0.874	-0.666	-0.305	-0.235	-1.041	-1.206	-1.263	-0.289	-1.534	-0.856	-1.298	-1.052	down		down	down			down	down	down		down	down	down	down
C7IVS4	pola-1	DNA polymerase	1.02	0.616	1.351	1.38	1.227	1.56	0.641	0.569	0.473	0.394	0.524	0.334	0.987	0.974	up	up	up	up	up	up	up	up	up		up		up	up
P52717	ctsa-1.1	Serine carboxypeptidase ctsa-1.1	0.22	0.439	0.373	0.365	0.405	0.555	-0.583	-0.536	-0.402	-0.344	-0.149	-0.056	0.051	0.096		up	up	up	up	up	down	down	down
O16214	CELE_F17A9.4	Oxidored_FMN domain-containing protein	-1.995	-1.801	-1.865	-2.24	-2.202	-1.953	-0.602	-0.711	-0.988	-1.255	-1.309	-1.606	-1.349	-2.076	down	down	down	down	down	down	down	down	down	down	down	down	down	down
Q20168	copb-2	Probable coatomer subunit beta'	-0.372	-0.543	-0.348	-0.394	-0.326	-0.361	-0.307	-0.275	-0.235	-0.138	-0.323	-0.328	-0.47	-0.268	down	down	down	down	down	down	down	down	down		down	down	down	down
H2L2B2	CELE_F46B6.5	LisH domain-containing protein	0.164	0.179	0.438	0.465	0.198	0.26	0.494	0.375	0.082	0.222	0.051	0.01	0.484	0.201			up	up			up	up					up
Q23338	fkb-4	Peptidylprolyl isomerase	-3.037	-3.727	-4.288	-4.487	-3.94	-4.592	-1.485	-2.004	-2.413	-2.506	-3.038	-3.739	-3.446	-4.476	down	down	down	down	down	down	down	down	down	down	down	down	down	down
Q18095	C18E9.4	NADH dehydrogenase [ubiquinone] 1 beta subcomplex subunit 3	-0.982	-1.017	-1.062	-1.154	-1.006	-1.171	-0.433	-0.552	-0.745	-0.58	-0.875	-0.737	-1.092	-0.857	down	down	down	down	down	down	down	down	down	down	down	down	down	down
Q22623	mrpl-50	39S ribosomal protein L50, mitochondrial	-1.03	-1.163	-1.608	-1.347	-1.398	-1.304	-0.579	-0.868	-1.207	-1.163	-1.059	-1.383	-1.221	-1.191	down	down	down	down	down	down	down	down	down	down	down	down	down	down
P54217	spe-11	Spermatocyte protein spe-11	-3.223	-2.879	-2.746	-2.282	-2.498	-2.261	-2.297	-3.446	-2.964	-2.521	-1.077	-3.724	-3.344	-3.094	down	down	down	down	down	down	down	down	down	down		down	down	down
Q9N3D1	CELE_Y54E10BR.3	RING-type E3 ubiquitin transferase	-0.082	-1.118	0.619	0.473	0.241	0.103	2.391	1.581	1.213	2.339	1.751	1.336	0.109	0.253							up			up	up
G5EBJ0	CELE_F42H11.1	Uncharacterized protein	-2.774	-1.814	-1.817	-1.699	-1.864	-1.728	-1.718	-3.181	-3.086	-1.64	-2.411	-3.187	-2.402	-2.762	down	down	down	down	down	down	down	down	down	down	down	down	down	down
Q9XWI6	eif-3.B	Eukaryotic translation initiation factor 3 subunit B	-0.918	-0.96	-0.816	-0.718	-0.754	-0.778	-0.37	-0.417	-0.574	-0.57	-0.782	-0.854	-0.879	-0.806	down	down	down	down	down	down	down	down	down	down	down	down	down	down
P41988	cct-1	T-complex protein 1 subunit alpha	-1.104	-1.44	-1.17	-1.08	-1.109	-1.046	-0.434	-0.782	-0.956	-1.021	-1.155	-1.267	-1.229	-1.105	down	down	down	down	down	down	down	down	down	down	down	down	down	down
Q965N3	BE0003N10.1	Polyribonucleotide nucleotidyltransferase	-0.629	-0.8	-0.559	-0.502	-0.498	-0.742	-0.428	-0.501	-0.458	-0.49	-0.589	-0.575	-0.725	-0.533	down	down	down	down	down	down	down	down	down	down	down	down	down	down
G5EDF5	tufm-2	Elongation factor Tu, mitochondrial	-0.727	-0.587	-0.5	-0.545	-0.457	-0.522	-0.428	-0.705	-0.606	-0.323	-0.73	-0.445	-0.699	-0.636	down	down	down	down	down	down	down	down	down	down	down	down	down	down
D9N120	wago-5	Piwi-like protein	-0.07	-0.243	0.071	0.333	0.009	0.093	0.569	0.407	0.131	0.312	0.153	0.283	-0.183	0.243				up			up	up
Q21241	lect-2	Leukocyte cell-derived chemotaxin-2 homolog	-0.874	-1.19	-0.627	-0.49	-0.309	-0.294	-0.968	-1.222	-1.085	-0.955	-1.443	-1.106	-1.082	-1.045	down	down	down				down	down	down	down	down	down	down	down
P49181	rpl-36	60S ribosomal protein L36	-1.577	-1.706	-1.868	-1.789	-2.059	-1.911	-0.56	-0.661	-0.845	-0.681	-1.205	-1.309	-1.36	-1.339	down	down	down	down	down	down	down	down	down	down	down	down	down	down
Q20063	CELE_F35G2.1	Sulfhydryl oxidase	2.117	2.201	2.598	2.766	2.907	2.596	0.637	0.202	0.935	0.998	1.11	1.66	1.836	2.321	up	up	up	up	up	up	up		up	up	up	up	up	up
Q19746	inx-3	Innexin-3	2.038	2.49	2.356	2.468	2.289	2.253	1.107	1.399	0.79	1.481	1.526	1.527	2.268	2.368	up	up	up	up	up	up	up	up	up	up	up	up	up	up
Q21986	cra-1	N-terminal acetyltransferase B complex subunit NAA25 homolog	-0.878	-0.936	-1.107	-1.075	-1.012	-1.06	-0.423	-0.423	-0.484	-0.496	-0.702	-0.79	-0.8	-0.658	down	down	down	down	down	down	down	down	down	down	down	down	down	down
E0AHA7	unc-70	Spectrin beta chain	0.311	0.428	0.396	0.512	0.484	0.661	-0.388	-0.427	-0.302	-0.356	-0.085	0.068	0.134	0.109	up	up	up	up	up	up	down	down	down	down
Q20822	srpa-68	Signal recognition particle subunit SRP68	-1.391	-1.43	-1.845	-1.814	-1.687	-1.635	-0.438	-0.648	-1.048	-1.113	-1.249	-1.302	-1.377	-1.384	down	down	down	down	down	down	down	down	down	down	down	down	down	down
Q22438	mrpl-51	39S ribosomal protein L51, mitochondrial	-0.912	-0.937	-0.795	-0.753	-0.704	-0.888	-0.453	-0.632	-0.613	-0.672	-0.76	-0.67	-1.025	-0.796	down	down	down	down	down	down	down	down	down	down	down	down	down	down
O61709	CELE_R119.3	Uncharacterized protein	-0.58	-0.561	-0.948	-0.704	-0.879	-0.745	-0.613	-0.844	-0.753	-0.638	-0.535	-0.469	-0.517	-0.727	down	down	down	down	down	down	down	down	down	down	down	down	down	down
O62416	lys-2	Lysozyme-like protein 2	-4.219	-4.232	-5.335	-5.105	-5.146	-5.287	-2.008	-1.479	-1.91	-2.672	-2.889	-3.44	-4	-4.673	down	down	down	down	down	down	down	down	down	down	down	down	down	down
P41842	trd-1	Tetratricopeptide repeat-containing protein trd-1	-0.546	-0.538	-0.548	-0.453	-0.563	-0.561	-0.544	-0.675	-0.538	-0.696	-0.444	-0.552	-0.7	-0.473	down	down	down	down	down	down	down	down	down	down	down	down	down	down
A0A5K1ICF1	znf-598	RING-type E3 ubiquitin transferase	-0.63	-0.523	-0.459	-0.383	-0.482	-0.469	-0.437	-0.542	-0.485	-0.552	-0.615	-0.48	-0.647	-0.67	down	down	down	down	down	down	down	down	down	down	down	down	down	down
P24554	radA	DNA repair protein RadA	-1.602	0.516	-0.82	-0.726	-0.804	-0.747	-2.181	-1.733	-1.508	-1.534	-1.307	-1.599	-0.489	-0.867							down	down	down			down
O01755	apm-1	MHD domain-containing protein	-1.696	-1.397	-1.494	-1.656	-1.674	-1.489	-0.84	-1.068	-0.978	-0.799	-1.311	-0.959	-1.383	-1.448	down	down	down	down	down	down	down	down	down	down	down	down	down	down
O45168	ifc-1	Intermediate filament protein ifc-1	-1.474	-1.055	-1.158	-1.089	-1.164	-0.795	-0.786	-1.116	-1.329	-1.127	-1.09	-1.378	-1.214	-1.336	down	down	down	down	down	down	down	down	down	down	down	down	down	down
O01501	cye-1	G1/S-specific cyclin-E	0.801	0.828	2.163	1.498	2.288	2.599	1.455	1.139	1.454	1.137	1.286	2.044	0.657	1.687			up	up	up	up	up	up	up	up	up	up		up
Q9BHK7	xrn-1	5'-3' exoribonuclease 1	-0.444	-0.557	-0.515	-0.49	-0.445	-0.38	-0.337	-0.578	-0.63	-0.551	-0.731	-0.733	-0.53	-0.64	down	down	down	down	down	down	down	down	down	down	down	down	down	down
O44983	CELE_K02F2.5	Uncharacterized protein	-1.963	-2.026	-2.873	-3.899	-3.692	-3.414	-2.704	-3.326	-3.77	-4.029	-2.244	-2.965	-3.918	-4.046		down	down	down	down	down	down	down	down	down	down	down	down	down
Q17692	C06A8.6	Protein phosphatase 1 regulatory subunit 7	-1.961	-2.461	-1.435	-1.719	-1.938	-1.942	-2.015	-2.46	-2.757	-2.317	-2.48	-2.951	-2.696	-3.088	down	down	down	down	down	down	down	down	down	down	down	down	down	down
Q20797	syx-5	Putative syntaxin-5	-0.825	-0.762	-0.558	-0.509	-0.612	-0.609	-0.508	-0.875	-1.302	-1.128	-1.045	-1.062	-1.183	-0.674	down	down	down	down	down	down	down	down	down	down	down	down	down	down
P49405	rpl-5	60S ribosomal protein L5	-1.043	-1.243	-1.082	-1.015	-1.037	-1.277	-0.427	-0.7	-0.887	-0.829	-1.109	-1.035	-1.343	-1.06	down	down	down	down	down	down	down	down	down	down	down	down	down	down
D6VPA4	nlp-78	Neuropeptide-Like Protein	-3.793	-3.215	-2.559	-2.55	-2.479	-2.564	-2.293	-3.105	-3.53	-3.803	-3.602	-2.888	-3.72	-3.569	down	down	down	down	down	down	down	down	down	down	down	down	down	down
O61789	egg-5	Inactive protein-tyrosine phosphatase egg-5	0.424	0.437	0.977	1.32	1.279	1.008	0.683	0.995	1.301	1.242	1.036	0.701	0.393	0.82			up	up	up	up	up	up	up	up	up	up		up
Q27492	rpc-2	DNA-directed RNA polymerase subunit beta	-0.946	-0.907	-0.888	-0.916	-0.78	-0.783	-0.428	-0.645	-0.749	-0.571	-0.906	-0.902	-1.022	-0.88	down	down	down	down	down	down	down	down	down	down	down	down	down	down
G5ECF8	nsph-4.2	Nematode Specific Peptide family	-3.931	-2.583	-3.278	-3.2	-2.552	-2.514	-2.078	-2.766	-3.13	-4.137	-2.161	-3.439	-3.184	-2.473	down	down	down	down	down	down	down	down	down	down	down	down	down	down
G5EBP0	CELE_K08C7.6	Uncharacterized protein	-0.324	0.536	0.623	0.829	0.577	0.718	-0.765	-0.52	-0.627	-0.204	-0.323	0.279	-0.169	0.238			up	up	up	up	down		down
Q18566	rpc-1	DNA-directed RNA polymerase subunit	-0.901	-1.001	-0.798	-0.821	-0.802	-0.817	-0.457	-0.793	-0.756	-0.882	-0.883	-0.954	-0.963	-0.868	down	down	down	down	down	down	down	down	down	down	down	down	down	down
G5EDI0	dcar-1	G_PROTEIN_RECEP_F1_2 domain-containing protein	-1.296	-1.835	-0.802	-0.562	-1.243	-0.595	-1.739	-1.84	-1.634	-1.548	-1.497	-1.592	-1.239	-1.476		down			down		down	down	down	down	down	down		down
G5EDN3	tim-1	Protein timeless homolog	1.571	1.442	1.867	1.708	1.726	1.662	0.887	0.937	1.165	1.324	1.208	1.133	1.671	1.592	up	up	up	up	up	up	up	up	up	up	up	up	up	up
Q09263	efr-3	Protein EFR3 homolog	-0.095	0.188	0.271	0.229	0.399	0.311	-0.458	-0.369	-0.258	-0.095	-0.187	-0.078	0.053	0.076			up		up	up	down	down
Q21029	nsy-1	Mitogen-activated protein kinase kinase kinase nsy-1	0.082	0.361	1.157	1.302	1.236	0.753	-1.134	-0.788	-0.542	-0.047	-0.036	0.129	-0.07	0.166			up	up	up	up	down
Q94360	nduf-7	Probable NADH dehydrogenase [ubiquinone] iron-sulfur protein 7, mitochondrial	-1.713	-1.837	-2.217	-2.173	-2.147	-1.95	-0.813	-1.152	-1.6	-1.614	-1.676	-1.373	-1.885	-1.942	down	down	down	down	down	down	down	down	down	down	down	down	down	down
Q7JP80	CELE_T13C2.6	EGF-like domain-containing protein	0.668	0.54	0.536	0.459	0.534	0.255	0.458	0.571	0.621	0.652	0.653	0.611	0.637	0.796	up	up	up	up	up		up	up	up	up	up	up	up	up
Q9UAY9	rpac-40	RPOLD domain-containing protein	-1.602	-2.321	-1.543	-1.728	-1.596	-1.426	-0.845	-1.885	-2.185	-2.404	-2.534	-2.036	-2.446	-2.239	down	down	down	down	down	down	down	down	down	down	down	down	down	down
Q3Y3Z9	C01B10.11	Uncharacterized protein	-2.856	-3.219	-2.972	-2.791	-2.709	-2.79	-1.053	-1.113	-1.653	-1.569	-2.129	-2.31	-2.385	-2.813	down	down	down	down	down	down	down	down	down	down	down	down	down	down
Q18965	eat-3	Dynamin-like 120 kDa protein, mitochondrial	-0.461	-0.424	-0.34	-0.31	-0.379	-0.366	-0.393	-0.452	-0.422	-0.422	-0.308	-0.434	-0.458	-0.428	down	down	down	down	down	down	down	down	down	down	down	down	down	down
Q20748	atad-3	ATPase family AAA domain-containing protein 3	-0.787	-0.898	-0.951	-0.902	-0.95	-1.045	-0.401	-0.507	-0.531	-0.508	-0.683	-0.833	-0.847	-0.807	down	down	down	down	down	down	down	down	down	down	down	down	down	down
G5ED45	hyl-1	Ceramide synthase hyl-1	-0.999	-1.147	-1.369	-1.389	-1.198	-0.905	-1.41	-1.202	-1.315	-1.288	-1.507	-0.819	-1.162	-1.295		down	down	down	down	down	down	down	down	down	down		down	down
Q95XL8	chaf-2	WD_REPEATS_REGION domain-containing protein	1.391	1.229	1.73	1.645	1.533	1.67	0.659	0.71	0.998	1.118	1.101	0.928	1.517	1.387	up	up	up	up	up	up	up	up	up	up	up	up	up	up
P53013	eft-4	Elongation factor 1-alpha	-1.355	-1.322	-0.906	-0.852	-1.031	-0.747	-0.642	-0.936	-1.141	-1.091	-1.146	-1.236	-1.231	-1.307	down	down	down	down	down	down	down	down	down	down	down	down	down	down
O02056	rpl-4	60S ribosomal protein L4	-0.996	-1.237	-1.36	-1.271	-1.266	-1.478	-0.405	-0.543	-0.602	-0.697	-0.889	-0.998	-1.11	-0.995	down	down	down	down	down	down	down	down	down	down	down	down	down	down
Q23066	cpt-6	Carn_acyltransf domain-containing protein	0.221	0.538	0.847	0.204	0.784	0.882	-1.11	-0.385	-0.82	-0.769	-1.04	-1.498	0.613	0.167			up		up	up	down		down		down	down
Q19102	ard-1	Alcohol/Ribitol Dehydrogenase family	-1.274	-1.443	-1.931	-1.946	-2.037	-1.953	-0.657	-0.903	-1.023	-0.905	-1.146	-1.225	-1.405	-1.423	down	down	down	down	down	down	down	down	down	down	down	down	down	down
G5EDG9	hex-3	Beta-N-acetylhexosaminidase	1.597	1.525	1.687	1.537	1.531	1.32	0.771	1.117	1.086	1.833	1.675	1.487	1.624	1.992	up	up	up	up	up	up	up	up	up	up	up	up	up	up
Q22666	CELE_T22C1.6	Uncharacterized protein	-0.994	-1.285	-0.67	-0.66	-0.789	-0.807	-0.471	-0.912	-0.894	-0.84	-0.903	-0.678	-1.223	-0.94	down	down	down	down	down	down	down	down	down	down	down	down	down	down
O45366	CELE_F14H3.4	Uncharacterized protein	1.467	1.783	2.808	2.183	2.671	2.155	1.809	0.447	0.075	0.351	1.463	0.971	1.548	1.239	up	up	up	up	up	up	up				up		up
H2L0Q6	ral-1	RAL (Ras-related GTPase) homolog	-0.75	-0.85	-0.311	-0.077	-0.018	0.232	-0.927	-1.144	-1.381	-0.954	-1.194	-0.972	-1.156	-0.891	down	down					down	down	down	down	down	down	down	down
Q9NAG4	mac-1	Protein mac-1	-0.955	-0.8	-1.104	-0.982	-1.015	-0.998	-0.495	-0.878	-0.995	-1.264	-1.079	-1.015	-1.098	-1.071	down	down	down	down	down	down	down	down	down	down	down	down	down	down
G5EDB2	madd-3	Probable dual specificity protein kinase madd-3	-0.855	-0.88	-0.563	-0.604	-0.652	-0.493	-0.648	-0.928	-0.855	-0.507	-1.026	-0.804	-0.897	-0.799	down	down	down	down	down	down	down	down	down	down	down	down	down	down
Q23062;Q23347	ssq-4	Sperm-Specific family, class Q;Sperm-Specific family, class Q	-4.503	-4.168	-3.72	-3.845	-4.051	-3.725	-2.006	-4.42	-3.957	-4.885	-4.173	-4.395	-4.229	-4.296	down	down	down	down	down	down	down	down	down	down	down	down	down	down
Q9XWW0	cec-7	C.Elegans Chromodomain protein	1.153	0.815	1.53	1.635	1.514	1.734	0.625	0.479	0.733	0.859	0.738	0.741	1.067	1.09	up	up	up	up	up	up	up	up	up	up	up	up	up	up
P90993	mrpl-41	39S ribosomal protein L41, mitochondrial	-1.215	-1.037	-1.646	-1.709	-1.719	-1.748	-0.568	-0.733	-0.804	-1.055	-0.921	-1.066	-1.081	-1.039	down	down	down	down	down	down	down	down	down	down	down	down	down	down
Q93379	gsr-1	Glutathione reductase, mitochondrial	0.553	-0.267	0.524	0.799	0.613	0.808	-0.659	0.102	0.724	0.706	0.354	0.155	0.002	0.37	up		up	up	up	up	down		up	up
O76616	pid-3	Protein pid-3	0.194	0.223	-0.013	0.08	0.114	0.173	0.471	0.309	0.392	0.412	0.307	0.254	0.241	0.488							up		up	up	up			up
Q9XVJ5	zipt-9	Zrt (ZRT), Irt-(IRT-) like Protein Transporter	-4.485	-5.479	-3.83	-4.171	-4.501	-4.093	-2.483	-5.192	-4.595	-5.235	-4.744	-4.778	-5.575	-4.695	down	down	down	down	down	down	down	down	down	down	down	down	down	down
Q19832	msp-3	Major sperm protein 3	-7.954	-7.779	-7.301	-7.535	-7.201	-6.596	-2.335	-6.912	-7.843	-7.661	-8.03	-7.817	-7.482	-8.18	down	down	down	down	down	down	down	down	down	down	down	down	down	down
H2L0B7	CELE_H14N18.4	Uncharacterized protein	-0.244	-0.781	-0.588	-0.553	-0.562	-0.654	-1.063	-0.723	-0.352	-0.546	-0.542	-0.331	-0.483	-0.902						down	down							down
Q9U2H4	fcd-2	FANCD2 (Fanconi's anemia defect) ortholog	0.847	0.623	1.357	1.438	1.252	1.241	0.655	0.442	0.622	0.79	0.634	0.554	0.737	0.805	up	up	up	up	up	up	up		up	up	up	up	up	up
Q75MI6	CELE_Y94H6A.10	Uncharacterized protein	-0.69	-0.52	-1.356	-1.513	-1.396	-1.595	-0.696	-0.644	-0.915	-0.779	-0.305	-0.694	-0.731	-0.828	down		down	down	down	down	down	down	down	down		down	down	down
Q9U1Z4	tmed-4	GOLD domain-containing protein	-0.355	-0.305	-0.334	-0.294	-0.492	-0.44	-0.421	-0.538	-0.504	-0.015	-0.316	-0.264	-0.257	-0.422	down		down	down	down	down	down	down	down		down			down
Q23232	wdr-4	tRNA (guanine-N(7)-)-methyltransferase non-catalytic subunit	-0.286	-0.339	-0.186	-0.244	-0.171	-0.027	0.419	0.135	-0.078	-0.216	-0.147	-0.415	0.007	-0.117		down		down			up					down
Q965Q1	CELE_Y22D7AL.10	10 kDa heat shock protein, mitochondrial	-0.828	-0.894	-1.08	-0.969	-1.231	-1.164	-0.611	-0.839	-0.691	-0.529	-0.652	-0.791	-0.998	-0.875	down	down	down	down	down	down	down	down	down	down	down	down	down	down
O02207	oxa-1	OXA mitochondrial inner membrane insertase homolog	-1.759	-1.782	-1.874	-1.468	-1.293	-1.457	-0.851	-1	-1.491	-1.697	-1.441	-1.69	-1.842	-1.569	down	down	down	down	down	down	down	down	down	down	down	down	down	down
Q95QL2	mrpl-13	Mitochondrial Ribosomal Protein, Large	-1.049	-1.18	-0.882	-1.028	-1.204	-1.057	-0.628	-0.796	-0.951	-0.536	-0.864	-0.969	-1.082	-0.863	down	down	down	down	down	down	down	down	down	down	down	down	down	down
Q21752	vdac-1	Probable voltage-dependent anion-selective channel	-1.144	-1.217	-1.283	-1.229	-1.128	-1.021	-0.429	-0.678	-0.955	-0.854	-1.246	-0.937	-1.258	-1.206	down	down	down	down	down	down	down	down	down	down	down	down	down	down
P0A825	glyA	Serine hydroxymethyltransferase	-0.748	1.662	-0.132	1.028	-0.117	-0.086	-2.601	-1.818	-0.806	-1.527	-0.041	-0.064	0.75	0.334							down
P50093	phb-2	Mitochondrial prohibitin complex protein 2	-0.924	-0.988	-0.57	-0.519	-0.605	-0.587	-0.557	-0.65	-0.915	-0.903	-0.933	-0.956	-0.994	-0.953	down	down	down	down	down	down	down	down	down	down	down	down	down	down
A0A2C9C3B2;Q19288	CELE_F10C1.23	Uncharacterized protein	-6.042	-5.899	-4.971	-5.015	-5.057	-4.232	-2.062	-5.258	-5.635	-5.798	-5.942	-5.286	-4.839	-5.928	down	down	down	down	down	down	down	down	down	down	down	down	down	down
A2V8C8	CELE_H29C22.1	Uncharacterized protein	-0.31	-0.181	1.58	1.757	1.6	1.074	1.728	1.479	1.32	1.234	1.14	0.639	1.321	1.174			up	up	up	up	up	up	up		up		up
Q95Y90	rpl-9	60S ribosomal protein L9	-1.729	-1.931	-1.583	-1.478	-1.573	-1.616	-0.61	-0.814	-1.146	-0.798	-1.69	-1.361	-1.753	-1.49	down	down	down	down	down	down	down	down	down	down	down	down	down	down
G5ECC9	mrps-27	Ig-like domain-containing protein	-1.064	-1.256	-1.098	-1.073	-1.055	-1.143	-0.42	-0.565	-0.73	-0.511	-0.929	-1.004	-1.124	-1.067	down	down	down	down	down	down	down	down	down	down	down	down	down	down
Q9XWP7	eif-3.j	Eukaryotic Initiation Factor	-1.016	-1.324	-0.953	-1.01	-1.038	-1.16	-0.471	-0.789	-1.085	-0.785	-0.967	-1.1	-1.411	-1.104	down	down	down	down	down	down	down	down	down	down	down	down	down	down
O62512	CELE_ZK550.3	Peptidase_M3 domain-containing protein	-1.101	-1.146	-1.299	-1.214	-1.271	-1.344	-0.466	-0.58	-0.856	-0.741	-0.868	-1.008	-1.08	-1.018	down	down	down	down	down	down	down	down	down	down	down	down	down	down
O17589	eat-16	Uncharacterized protein	-0.161	-0.03	0.316	0.286	0.209	0.43	-0.619	-0.68	-0.51	-0.405	-0.597	-0.403	-0.174	-0.126						up	down	down	down		down
Q9N4A5	hxk-3	Phosphotransferase	-0.765	-0.702	-0.561	-0.564	-0.566	-0.358	-0.505	-0.62	-0.933	-0.965	-0.86	-1.023	-0.78	-0.752	down	down	down	down	down	down	down	down	down	down	down	down	down	down
B5WWL2	CELE_F52C12.6	Non-specific serine/threonine protein kinase	-0.447	-0.546	-0.028	-0.15	-0.004	0.046	-0.499	-0.475	-0.472	-0.495	-0.54	-0.371	-0.354	-0.442	down	down					down	down	down	down	down	down		down
Q95YC7	C45B2.2	Uncharacterized protein	-2.131	-3.411	-2.75	-2.139	-2.565	-2.046	-1.78	-2.682	-3.205	-3.868	-2.859	-3.548	-2.746	-3.203	down	down	down	down	down	down	down	down	down	down	down	down	down	down
Q95XP9	zwl-1	Protein zwilch homolog	0.414	0.31	0.708	0.82	0.592	0.807	0.543	0.584	0.455	0.392	0.608	0.471	0.525	0.609			up	up	up	up	up	up	up		up	up	up	up
Q9TXR4	msh-2	DNA_MISMATCH_REPAIR_2 domain-containing protein	0.723	0.472	0.83	0.76	0.91	0.976	0.527	0.482	0.608	0.498	0.522	0.501	0.539	0.618	up	up	up	up	up	up	up	up	up	up	up	up	up	up
Q95Y83	mrpl-19	Probable 39S ribosomal protein L19, mitochondrial	-1.33	-1.216	-1.321	-1.053	-1.269	-1.567	-0.693	-0.953	-1.112	-0.941	-1.308	-1.002	-1.337	-1.265	down	down	down	down	down	down	down	down	down	down	down	down	down	down
P34563	iff-1	Eukaryotic translation initiation factor 5A-1	-0.169	-0.223	0.285	0.333	0.214	0.147	0.532	0.393	0.33	0.262	0.151	-0.016	0.003	0.097				up			up	up
D0VWL6	fln-2	FiLamiN (Actin binding protein) homolog	0.061	0.152	0.266	0.423	0.319	0.493	-0.473	-0.531	-0.384	-0.299	-0.278	-0.016	-0.125	-0.127				up	up	up	down	down	down
Q20206	rps-11	40S ribosomal protein S11	-1.251	-1.417	-1.593	-1.485	-1.378	-1.476	-0.391	-0.706	-1.036	-1.164	-1.295	-1.382	-1.603	-1.36	down	down	down	down	down	down	down	down	down	down	down	down	down	down
Q9BKR5	CELE_Y82E9BR.18	Uncharacterized protein	-0.344	-0.596	-0.251	-0.201	-0.246	-0.179	-0.341	-0.511	-0.501	-0.463	-0.446	-0.348	-0.568	-0.325	down	down	down	down	down		down	down	down	down	down	down	down	down
Q09216	B0495.7	Putative endoplasmic reticulum metallopeptidase 1-A	0.233	-0.022	0.438	0.505	0.403	0.496	-0.485	-0.079	0.093	0.304	0.014	0.207	0.286	0.183			up	up	up	up	down
H2KZ86	abhd-5.2	Abhydrolase domain-containing protein abhd-5.2	3.063	3.226	2.018	1.499	3.179	2.496	2.442	3.312	2.947	0.892	2.94	1.594	2.964	2.055	up	up	up	up	up	up	up	up	up		up		up	up
Q23369	best-22	Bestrophin homolog 22	-1.214	-1.185	-1.525	-1.8	-1.554	-1.219	-2.17	-2.121	-1.159	-2.503	-1.723	-1.531	-1.398	-1.883			down	down	down		down	down		down	down			down
O17218	rps-22	Ribosomal Protein, Small subunit	-1.445	-1.499	-1.634	-1.433	-1.689	-1.81	-0.582	-0.775	-1.044	-0.885	-1.273	-1.291	-1.478	-1.384	down	down	down	down	down	down	down	down	down	down	down	down	down	down
A0A0K3AV08	mlk-1	Mitogen-activated protein kinase kinase kinase mlk-1	0.202	-0.892	0.525	0.403	0.29	0.481	-1.167	-1.03	-0.178	-0.323	-0.022	0.152	-0.496	-0.349							down	down
O62342	CELE_R07E5.15	Uncharacterized protein	-2.09	-0.745	-1.044	-1.195	-1.029	-1.773	-1.703	-2.07	-0.935	-1.442	-0.98	-0.943	-1.292	-1.81	down		down	down	down	down	down	down		down				down
Q8WSN7	CELE_Y41D4B.4	Uncharacterized protein	1.465	1.828	1.077	1.372	1.318	1.545	0.848	0.773	1.215	0.969	1.387	1.144	1.66	1.472	up	up	up	up	up	up	up	up	up	up	up	up	up	up
O44992	dscc-1	Sister chromatid cohesion protein DCC1	0.805	0.931	1.053	1.162	1.01	1.059	0.565	0.77	0.869	1.094	0.967	0.869	0.695	1.083	up	up	up	up	up	up	up	up	up	up	up	up	up	up
Q9NAA5	Y53F4B.13	Cap-specific mRNA (nucleoside-2'-O-)-methyltransferase 1	-0.285	-0.58	-0.148	-0.229	-0.106	0.09	-0.422	-0.734	-0.716	-0.721	-0.875	-0.734	-0.379	-0.578		down					down	down	down	down	down	down	down	down
O76712;Q966G2	ttbk-2	Protein kinase domain-containing protein	-3.778	-4.139	-2.874	-3.617	-2.936	-2.949	-1.699	-4.745	-4.313	-2.98	-3.216	-3.947	-3.488	-4.318	down	down	down	down	down	down	down	down	down	down	down	down	down	down
O44978	ptr-11	SSD domain-containing protein	-0.854	-1.323	-1.724	-1.814	-1.324	-0.828	-1.691	-1.566	-2.133	-0.949	-1.169	-1.468	-0.879	-1.209		down	down	down	down		down	down	down		down	down
O44167	CELE_F15B10.3	Uncharacterized protein	1.377	0.761	0.88	1.017	0.707	1.021	1.723	0.654	0.25	0.097	-0.093	0.384	0.321	0.884	up			up		up	up
P34540	unc-116	Kinesin heavy chain	-0.183	-0.242	0.078	0.091	0.148	0.182	-0.296	-0.135	-0.215	-0.173	-0.188	-0.161	-0.183	-0.295		down				up	down		down					down
A0A4V0IKJ7	CELE_F49E2.5	Uncharacterized protein	-0.91	-1.006	-1.026	-1.372	-1.158	-1.462	-0.554	-0.697	-0.942	-1.001	-1.002	-1.154	-1.237	-1.177	down	down	down	down	down	down	down	down	down	down	down	down	down	down
Q86G90	npp-9	Nuclear Pore complex Protein	0.208	0.04	0.23	0.236	0.166	0.244	0.349	0.145	-0.046	0.06	0.064	-0.135	0.229	0.167			up	up		up	up
G5EFV6	catp-4	Sodium/potassium-transporting ATPase subunit alpha	-2.852	-2.909	-2.308	-2.179	-1.674	-1.648	-1.757	-2.965	-2.75	-3.167	-3.045	-2.811	-4.118	-2.58	down	down	down	down	down	down	down	down	down	down	down	down	down	down
O16541	fbxc-50	F-box C protein	-0.15	-0.176	-0.194	0.078	-0.036	-0.102	0.681	0.882	0.796	0.354	0.572	0.644	-0.066	0.047							up	up	up		up	up
B9ZSG9	ztf-18	C2H2-type domain-containing protein	2.423	2.082	3.029	2.96	2.613	3.372	1.453	1.936	1.926	1.641	1.508	2.098	2.145	2.292	up	up	up	up	up	up	up	up	up	up	up	up	up	up
P34445	F54C8.7	Uncharacterized protein F54C8.7	-0.808	-1.173	-0.806	-0.886	-0.768	-0.615	-0.583	-0.669	-0.527	-0.52	-0.87	-0.713	-0.742	-0.914	down	down	down	down	down	down	down	down	down	down	down	down	down	down
O61790	R12E2.11	Orotate phosphoribosyltransferase	-2.314	-2.048	-2.698	-2.441	-2.79	-2.656	-0.723	-0.823	-1.045	-1.152	-1.399	-1.394	-2.226	-1.995	down	down	down	down	down	down	down	down	down	down	down	down	down	down
Q09165	dig-1	Mesocentin	0.531	0.671	0.922	0.95	0.945	1.185	-0.4	-0.472	-0.325	-0.153	-0.059	0.15	0.259	0.317	up	up	up	up	up	up	down	down	down					up
Q95XS1	trap-3	Translocon-associated protein subunit gamma	-1.895	-1.823	-3.498	-3.249	-3.613	-3.233	-0.701	-0.969	-1.242	-1.456	-1.235	-1.831	-1.823	-2.313	down	down	down	down	down	down	down	down	down	down	down	down	down	down
Q9N393	CELE_Y54H5A.1	WD_REPEATS_REGION domain-containing protein	-0.65	-0.802	-1.162	-1.23	-1.109	-1.164	-0.392	-0.592	-0.653	-0.317	-0.602	-0.672	-0.655	-0.687	down	down	down	down	down	down	down	down	down	down	down	down	down	down
Q22498	copg-1	Probable coatomer subunit gamma	-0.531	-0.586	-0.384	-0.384	-0.309	-0.334	-0.323	-0.411	-0.503	-0.393	-0.544	-0.518	-0.537	-0.518	down	down	down	down	down	down	down	down	down	down	down	down	down	down
Q19276	CELE_F09F7.6	Uncharacterized protein	2.267	2.121	2.994	2.809	2.764	2.712	1.2	1.367	2.125	2.158	2.201	2.639	2.083	2.267	up	up	up	up	up	up	up	up	up	up	up	up	up	up
Q7KPW7	mrpl-1	Mitochondrial Ribosomal Protein, Large	-0.926	-0.965	-1.181	-1.179	-1.034	-1.175	-0.44	-0.651	-0.726	-0.86	-0.79	-0.822	-1.027	-0.987	down	down	down	down	down	down	down	down	down	down	down	down	down	down
Q9BPN6	mrpl-15	39S ribosomal protein L15, mitochondrial	-1.767	-1.866	-1.922	-1.82	-1.841	-1.673	-0.823	-1.304	-1.602	-2.149	-1.591	-2.044	-1.954	-1.767	down	down	down	down	down	down	down	down	down	down	down	down	down	down
P10567	unc-15	Paramyosin	-0.847	-0.765	-0.894	-0.905	-1.036	-0.752	-0.582	-0.449	-0.866	-0.542	-1.156	-0.641	-0.999	-0.935	down	down	down	down	down	down	down	down	down	down	down	down	down	down
G5EGS5	gbf-1	Golgi-specific brefeldin A-resistance guanine nucleotide exchange factor 1 homolog	-0.428	-0.449	-0.383	-0.531	-0.498	-0.631	-0.285	-0.202	-0.244	-0.108	-0.229	-0.272	-0.343	-0.415	down	down	down	down	down	down	down		down		down	down	down	down
B3CJ34	gcn-1	TOG domain-containing protein	-0.718	-0.757	-0.612	-0.696	-0.574	-0.732	-0.318	-0.417	-0.487	-0.479	-0.66	-0.678	-0.805	-0.718	down	down	down	down	down	down	down	down	down	down	down	down	down	down
Q19749	dlat-1	Dihydrolipoyllysine-residue acetyltransferase component of pyruvate dehydrogenase complex, mitochondrial	-0.878	-1.067	-0.876	-0.845	-0.887	-0.945	-0.431	-0.702	-0.642	-0.124	-0.702	-0.553	-0.778	-0.88	down	down	down	down	down	down	down	down	down		down	down	down	down
Q95ZW1	gos-28	Golgi SNAP receptor complex member 1	-0.178	-0.398	-0.141	-0.074	-0.334	-0.194	-0.655	-0.439	-0.408	-0.437	-0.455	-0.569	-0.32	-0.673							down				down	down		down
Q17968	nrde-1	Uncharacterized protein	1.097	1.089	1.026	1.131	1.258	0.999	0.717	0.956	1.102	1.005	1.099	0.878	1.017	1.416	up	up	up	up	up	up	up	up	up	up	up	up	up	up
A0A2C9C2Z6	C15F1.1	ShKT domain-containing protein	-1.978	-1.638	-2.233	-2.337	-2.349	-2.348	-0.735	-0.854	-1.036	-0.989	-1.206	-1.441	-1.694	-1.951	down	down	down	down	down	down	down	down	down	down	down	down	down	down
Q965P2	cht-4	Glyco_18 domain-containing protein	-0.049	-0.08	-0.457	0.006	0.361	0.033	-1.492	-1.027	-1.619	-0.786	-0.978	-0.676	-0.283	-0.5							down		down
Q21215	rack-1	Guanine nucleotide-binding protein subunit beta-2-like 1	-1.989	-1.893	-2.29	-2.329	-2.246	-2.125	-0.745	-1.171	-1.608	-2.011	-1.669	-1.927	-1.859	-2.04	down	down	down	down	down	down	down	down	down	down	down	down	down	down
G5EGN6	nlp-15	Neuropeptide-Like Protein	-2.006	-0.606	-1.739	-1.704	-1.255	-0.81	-1.763	-0.664	-1.005	-1.207	-0.636	-1.07	-1.626	-1.49	down		down	down	down		down						down	down
Q9XVJ3	qdpr-1	Quinoid DihydroPteridine Reductase	-0.288	0.031	-0.353	-0.26	-0.578	-0.678	0.587	0.65	0.612	0.433	0.58	0.336	0.372	-0.053					down	down	up	up	up		up
O45518	argk-1	Arginine kinase	-1.929	-1.561	-1.084	-0.858	-1.136	-1.031	-1.804	-2.581	-1.486	-1.537	-1.662	-1.845	-1.871	-1.852	down	down			down		down	down	down	down	down	down	down	down
P46975	stt-3	Dolichyl-diphosphooligosaccharide--protein glycosyltransferase subunit stt-3	-0.837	-0.946	-0.677	-0.503	-0.646	-0.385	-0.518	-0.568	-0.506	-0.636	-0.838	-0.641	-0.878	-0.94	down	down	down	down	down	down	down	down	down	down	down	down	down	down
Q22437	CELE_T12G3.4	Adipocyte plasma membrane-associated protein	0.882	0.93	0.901	0.924	1.089	1.053	0.406	0.51	0.652	0.74	0.913	0.72	0.838	0.818	up	up	up	up	up	up	up	up	up	up	up	up	up	up
O17839	mrpl-54	Mitochondrial Ribosomal Protein, Large	-1.39	-1.556	-1.598	-1.7	-1.686	-1.654	-0.835	-1.839	-1.459	-1.583	-1.54	-1.33	-1.931	-1.719	down	down	down	down	down	down	down	down	down	down	down	down	down	down
O17730	mpst-1	Putative thiosulfate sulfurtransferase mpst-1	-0.284	-0.548	-0.238	-0.363	-0.038	-0.357	-0.523	-0.61	-0.613	-0.511	-0.476	-0.428	-0.697	-0.386		down		down		down	down	down	down	down	down	down	down
Q21884	CELE_R09H10.5	Uncharacterized protein	-1.157	-0.887	-0.684	-0.533	-0.498	0.012	-0.793	-0.986	-1.332	-1.319	-1.569	-0.983	-1.46	-1.349	down	down	down	down	down		down	down	down	down	down	down	down	down
Q19459	F14E5.2	Golgi apparatus protein 1 homolog	-0.671	-0.586	-0.054	-0.062	-0.088	-0.127	-0.544	-0.698	-0.673	-0.442	-0.563	-0.806	-0.419	-0.718	down	down					down	down	down	down	down	down		down
P52011	cyn-3	Peptidyl-prolyl cis-trans isomerase 3	-2.198	-2.408	-2.376	-2.239	-2.414	-1.853	-1.195	-2.193	-2.81	-3.077	-2.35	-2.342	-2.268	-2.633	down	down	down	down	down	down	down	down	down	down	down	down	down	down
Q23651	elpc-3	Elongator complex protein 3	-0.7	-0.466	-0.813	-0.721	-0.659	-0.745	-0.418	-0.605	-0.5	-0.304	-0.689	-0.595	-0.796	-0.505	down	down	down	down	down	down	down	down	down		down	down	down	down
G5EER4	ger-1	GDP-L-fucose synthase	-2.921	-2.874	-1.879	-1.92	-2.263	-1.813	-1.163	-1.617	-2.026	-1.857	-2.474	-2.256	-2.696	-2.635	down	down	down	down	down	down	down	down	down	down	down	down	down	down
V6CJY2	CELE_H34C03.2	Ubiquitin carboxyl-terminal hydrolase	0.256	0.237	0.457	0.477	0.434	0.401	0.316	0.337	0.369	0.363	0.348	0.166	0.383	0.459	up		up	up	up	up	up	up	up	up	up		up	up
G5EC31	alh-6	Multifunctional fusion protein	-1.333	-1.46	-1.28	-1.364	-1.311	-1.333	-0.526	-0.887	-0.931	-0.993	-1.062	-0.872	-1.326	-1.368	down	down	down	down	down	down	down	down	down	down	down	down	down	down
B3WFW5	CELE_ZK858.6	Transmembrane 9 superfamily member	-0.611	-0.601	-0.443	-0.485	-0.391	-0.189	-0.511	-0.731	-0.544	-0.484	-0.768	-0.366	-0.405	-0.742	down	down	down	down	down		down	down	down	down	down		down	down
A9UJN7	maph-1.2	Microtubule-Associated Protein Homolog	0.155	0.053	0.116	0.136	0.022	0.145	0.341	0.216	0.21	0.27	0.325	0.195	0.153	0.301							up				up			up
O01479	unc-94	Tropomodulin	-0.247	-0.422	-0.305	-0.322	-0.463	-0.227	-0.456	-0.561	-0.453	-0.261	-0.51	-0.214	-0.456	-0.386		down	down	down	down		down	down	down		down		down	down
Q17832	vgln-1	ViGiLN homolog	-2.348	-2.342	-2.536	-2.57	-2.661	-2.698	-0.431	-0.632	-1.158	-1.305	-1.641	-1.698	-2.072	-2.257	down	down	down	down	down	down	down	down	down	down	down	down	down	down
Q8ITY8	CELE_R148.3	Uncharacterized protein	-0.665	-0.711	-0.535	-0.682	-0.548	-0.66	-0.354	-0.361	-0.554	-0.409	-0.592	-0.565	-0.445	-0.727	down	down	down	down	down	down	down	down	down	down	down	down	down	down
G5EGU1	egl-30	EGL-30	-0.024	-0.142	0.347	0.536	0.482	0.658	-0.462	-0.5	-0.49	-0.316	-0.309	-0.245	-0.11	-0.124			up	up	up	up	down	down	down
O18224	CELE_Y57G11B.5	Uncharacterized protein	2.292	2.608	3.112	3.357	3.004	2.887	-0.899	0.009	0.695	1.169	2.03	2.294	2.488	2.649	up	up	up	up	up	up	down		up	up	up	up	up	up
G5EEW7	asd-1	RNA-binding protein ASD-1	1.478	1.483	2.012	2.149	1.908	2.387	0.861	0.601	0.827	1.178	0.89	0.752	1.722	1.325	up	up	up	up	up	up	up		up	up	up	up	up	up
Q9NLC7	CELE_F58D5.7	Uncharacterized protein	-0.692	-0.377	-0.233	-0.327	-0.208	-0.2	-1.424	-0.466	-0.38	-0.718	-1.681	-0.468	-1.049	-1.068							down				down
G5EBH7	calu-1	CALUmenin (Calcium-binding protein) homolog	-1.844	-1.833	-1.849	-2.032	-1.868	-2.047	-0.503	-0.511	-0.887	-1.009	-1.398	-1.274	-1.73	-2.041	down	down	down	down	down	down	down	down	down	down	down	down	down	down
Q9BKT9	npp-13	Nuclear pore protein	0.134	0.046	-0.114	-0.004	-0.053	0.097	0.406	0.271	0.061	-0.035	0.084	-0.119	0.281	0.207							up
Q22071	mec-15	F-box/WD repeat-containing protein mec-15	1.327	1.346	1.541	1.763	1.969	1.514	1.718	1.814	1.619	2.151	1.193	1.997	1.13	1.354			up	up	up	up	up	up	up	up	up	up
Q09236	copd-1	Probable coatomer subunit delta	-0.528	-0.475	-0.694	-0.614	-0.7	-0.687	-0.332	-0.216	-0.285	-0.298	-0.27	-0.564	-0.356	-0.443	down	down	down	down	down	down	down		down	down	down	down	down	down
P0A9N4	pflA	Pyruvate formate-lyase 1-activating enzyme	-1.588	0.588	-0.513	-0.477	-0.753	-1.112	-3.454	-2.502	-0.188	-2.567	-0.797	0.325	-0.369	-0.207							down
G5EFQ9	mec-5	MEC-5	-0.612	-0.253	-0.626	-0.584	-0.515	-0.542	-1.151	-0.446	-1.228	-0.914	-0.713	-0.664	-0.741	-1.347							down		down					down
P19826	deb-1	Vinculin	-0.311	-0.275	-0.143	-0.037	-0.09	-0.002	-0.445	-0.558	-0.626	-0.291	-0.612	-0.346	-0.505	-0.326							down	down	down		down	down	down
G5EEG8	frm-1	Moesin/ezrin/radixin homolog 1	-0.086	-0.047	0.094	0.031	0.084	-0.004	-0.383	-0.441	-0.335	-0.203	-0.264	-0.124	-0.206	-0.135							down	down	down		down
Q11067	pdi-6	Protein disulfide-isomerase A6 homolog	-1.505	-1.333	-0.889	-0.998	-1.015	-0.826	-0.692	-0.662	-1.089	-1.467	-1.276	-1.292	-1.139	-1.729	down	down	down	down	down	down	down	down	down	down	down	down	down	down
Q9U2K8	abce-1	ABC transporter, class E	-0.81	-0.942	-0.583	-0.527	-0.599	-0.566	-0.35	-0.554	-0.809	-0.565	-0.996	-0.776	-0.918	-0.774	down	down	down	down	down	down	down	down	down	down	down	down	down	down
P0AA04	ptsH	Phosphocarrier protein HPr	-0.226	3.065	0.535	1.16	0.984	0.42	-3.295	-0.742	0.231	-0.131	1.119	1.443	1.659	0.16		up					down
O44199	rad-50	DNA repair protein rad-50	0.945	0.791	1.124	1.156	1.219	0.989	0.495	0.66	0.904	1.05	0.956	0.755	0.897	1.137	up	up	up	up	up	up	up	up	up	up	up	up	up	up
G5EC86	oma-1	CCCH-type zinc finger protein oma-1	1.263	1.023	1.536	1.737	1.579	1.099	0.952	1.749	1.936	1.921	1.991	1.466	1.164	1.734	up	up	up	up	up	up	up	up	up	up	up	up	up	up
Q17427	gna-1	Glucosamine 6-phosphate N-acetyltransferase	-0.177	-0.09	0.159	0.005	0.115	0.051	-0.559	-0.527	-0.389	-0.1	-0.178	-0.258	-0.07	-0.347							down	down
O01814	lbp-5	Fatty acid-binding protein homolog 5	-2.239	-2.537	-2.952	-3.325	-3.344	-3.203	-0.806	-1.102	-1.922	-2.157	-2.074	-2.01	-2.222	-2.618	down	down	down	down	down	down	down	down	down	down	down	down	down	down
Q20123	epg-4	Ectopic P granules protein 4	1.797	1.937	1.767	1.632	1.767	1.733	0.71	1.05	1.128	1.531	1.122	1.654	1.315	1.66	up	up	up	up	up	up	up	up	up	up	up	up	up	up
H2KZH5	toe-2	Target Of ERK kinase MPK-1	1.377	1.511	1.214	1.23	1.041	1.332	0.493	0.629	0.886	0.888	0.793	0.984	1.196	1.183	up	up	up	up	up	up	up	up	up	up	up	up	up	up
Q27470	cyp-33a1	CYtochrome P450 family	0.589	0.74	0.852	0.987	0.965	1.034	1.309	1.287	1.282	0.846	0.771	0.794	0.789	0.145			up	up	up	up	up	up	up
Q7JMS4	cyld-1	USP domain-containing protein	0.316	0.591	0.699	0.73	0.772	0.683	-0.444	-0.454	-0.354	-0.281	-0.053	0.136	0.099	0.21		up	up	up	up	up	down	down	down
Q8MNX6	nlp-34	Neuropeptide-Like Protein	0.777	0.039	1.295	1.784	1.338	2.158	-2.484	-1.966	-1.502	-1.618	-0.142	-0.998	0.684	0.523				up		up	down	down
Q93545	CELE_F20G2.2	Uncharacterized protein	-2.224	-2.235	-2.256	-2.323	-2.414	-2.111	-0.657	-1.053	-1.591	-1.544	-1.776	-1.793	-1.935	-2.418	down	down	down	down	down	down	down	down	down	down	down	down	down	down
Q23511	lars-2	Leucine--tRNA ligase	-0.469	-0.45	-0.258	-0.161	-0.272	-0.071	-0.391	-0.345	-0.34	-0.293	-0.38	-0.38	-0.44	-0.325	down	down	down		down		down	down	down		down	down	down	down
P33029	yeiQ	Uncharacterized oxidoreductase YeiQ	-1.312	-0.617	-1.273	-1.134	-0.915	-1.035	-2.248	-1.995	-2.059	-2.012	-1.753	-1.648	-1.63	-2.425							down	down	down	down	down			down
P34631	ubxn-4	UBX domain-containing protein 4	-0.805	-0.582	-0.201	-0.307	-0.247	-0.343	-0.459	-0.291	-0.382	-0.208	-0.288	-0.368	-0.374	-0.625	down	down		down		down	down		down			down	down	down
Q22257	hcp-2	HoloCentric chromosome binding Protein	0.801	0.684	1.155	1.188	1.09	1.149	0.442	0.591	0.775	0.792	0.862	0.583	0.994	1.015	up	up	up	up	up	up	up	up	up	up	up	up	up	up
Q21625	div-1	DNA polymerase alpha subunit B	1.114	1.033	1.751	1.743	1.509	1.818	0.652	0.602	0.562	0.641	0.637	0.596	1.214	1.044	up	up	up	up	up	up	up	up	up	up	up	up	up	up
P34651	ZK632.5	Uncharacterized protein ZK632.5	1.449	0.899	0.926	1.591	1.362	0.673	1.614	1.459	1.394	1.591	1.416	0.753	1.261	0.583	up			up	up		up	up	up	up	up
Q965N8	CELE_Y46E12BL.2	NUC173 domain-containing protein	-1.446	-1.89	-1.75	-1.937	-1.75	-1.991	-0.664	-1.081	-1.238	-1.31	-1.518	-1.491	-1.811	-1.528	down	down	down	down	down	down	down	down	down	down	down	down	down	down
P49958	dph-1	2-(3-amino-3-carboxypropyl)histidine synthase subunit 1	-0.741	-0.864	-0.883	-1.044	-0.928	-1.124	-0.619	-0.73	-0.785	-0.785	-0.705	-0.712	-0.792	-0.928	down	down	down	down	down	down	down	down	down	down	down	down	down	down
Q94420	mel-26	Protein maternal effect lethal 26	0.817	1.246	1.42	1.812	1.872	1.358	1.514	1.312	0.814	1.076	0.918	1.343	0.6	1.16		up	up	up	up	up	up	up				up
Q22601	apa-2	AP-2 complex subunit alpha	-0.411	-0.293	-0.289	-0.357	-0.23	-0.197	-0.351	-0.387	-0.378	-0.268	-0.259	-0.284	-0.187	-0.457	down	down	down	down	down		down	down	down		down	down		down
Q21732	CELE_R04F11.2	ATP synthase subunit e, mitochondrial	-1.054	-0.97	-0.661	-0.686	-0.79	-0.861	-0.438	-0.655	-0.76	-0.648	-0.824	-0.644	-1.042	-0.68	down	down	down	down	down	down	down	down	down	down	down	down	down	down
Q8MXF1	CELE_F56F11.4	AAA domain-containing protein	0.212	0.194	0.198	0.218	0.148	0.218	0.335	0.36	0.373	0.479	0.143	0.115	0.192	0.289				up		up	up	up	up	up				up
Q23635	CELE_ZK84.1	Uncharacterized protein	-1.056	-1.107	-2.11	-1.689	-2.029	-1.291	-0.936	-1.465	-2.056	-1.599	-1.521	-1.867	-1.658	-1.591	down	down	down	down	down	down	down	down	down	down	down	down	down	down
G5EE32	CELE_T04F3.1	Aminotran_1_2 domain-containing protein	-0.164	-0.055	0.059	0.123	0.013	0.053	-0.335	-0.45	-0.312	-0.267	-0.097	-0.099	-0.173	-0.204							down	down	down
Q17667	lnp-1	Endoplasmic reticulum junction formation protein lunapark-1	-0.703	-0.591	-0.333	-0.24	-0.38	-0.285	-0.49	-0.329	-0.418	-0.516	-0.45	-0.5	-0.584	-0.619	down	down	down		down		down		down	down	down	down	down	down
P53016	rfc-4	Replication factor C subunit 4	0.792	0.463	1.246	1.271	1.26	1.78	0.741	0.347	0.03	0.195	0.101	0.198	0.863	0.735	up		up	up	up	up	up						up	up
Q19699	gfat-2	Glutamine--fructose-6-phosphate transaminase (isomerizing)	0.264	0.152	0.281	0.531	0.324	0.171	0.788	1.025	1.052	0.968	0.9	0.601	0.215	0.558				up			up	up	up	up	up
Q21268	K07C11.7	UPF0046 protein K07C11.7	0.278	0.343	0.745	0.706	0.782	0.754	0.526	0.545	-0.035	-0.142	0.075	0.073	0.474	0.322			up	up	up	up	up	up					up
P34604	ZK1098.4	Probable translation initiation factor eIF-2B subunit alpha	-1.334	-1.377	-1.402	-1.428	-1.24	-1.233	-0.658	-0.994	-1.214	-1.445	-1.184	-1.37	-1.297	-1.481	down	down	down	down	down	down	down	down	down	down	down	down	down	down
Q95XR3	CELE_Y39G10AR.9	WD_REPEATS_REGION domain-containing protein	0.664	0.555	1.062	1.114	0.933	1.148	0.444	0.362	0.4	0.589	0.49	0.456	0.781	0.892	up	up	up	up	up	up	up	up	up	up	up	up	up	up
Q10943	arf-1.2	ADP-ribosylation factor 1-like 2	-0.88	-1.374	-0.102	-0.081	-0.142	-0.143	-0.502	-0.905	-0.788	-0.558	-1.068	-0.692	-0.944	-0.884	down	down					down	down	down	down	down	down	down	down
Q17883	apc-17	Anaphase-promoting complex subunit 1	0.402	0.588	1.007	0.864	1.089	1.065	0.722	0.682	0.91	0.881	0.457	0.315	0.468	0.814		up	up	up	up	up	up	up	up	up				up
O44566	CELE_W03F8.4	Uncharacterized protein	-0.315	-0.402	-0.418	-0.05	-0.087	0.219	-0.696	-0.842	-1.329	-1.36	-0.943	-0.925	-0.812	-0.919							down	down	down	down	down	down	down	down
O62477	CELE_Y45F10D.7	Uncharacterized protein	-1.08	-1.523	-1.28	-1.264	-1.409	-1.569	-0.537	-1.01	-1.163	-1.258	-1.368	-1.431	-1.529	-1.438	down	down	down	down	down	down	down	down	down	down	down	down	down	down
Q21353	glt-3	Putative sodium-dependent excitatory amino acid transporter glt-3	-3.356	-2.412	-3.153	-3.241	-3.059	-3.019	-2.174	-3.806	-3.378	-3.13	-4.13	-2.633	-2.538	-3.955	down	down	down	down	down	down	down	down	down	down	down	down	down	down
Q69Z12	mlc-7	Myosin Light Chain	0.05	-0.032	-0.119	-0.197	-0.201	-0.299	-0.449	-0.565	-0.556	-0.519	-0.194	-0.261	-0.126	-0.237						down	down	down	down	down
P0A8R0	rraA	Regulator of ribonuclease activity A	-1.062	1.112	-0.2	0.632	-0.143	0.169	-3.205	-2.185	-0.925	-0.863	-0.272	-0.247	0.206	-1.742							down
H2KYZ7	frm-4	FERM domain-containing protein	-0.135	-0.186	-0.128	-0.064	-0.087	-0.141	-0.498	-0.505	0.011	-0.029	0.141	0.021	-0.099	-0.226							down	down
Q18709	C49F8.3	DB domain-containing protein	-4.482	-5.155	-4.84	-5.075	-5.03	-5.472	-1.421	-2.15	-3.019	-3.858	-3.434	-6.429	-4.255	-5.137	down	down	down	down	down	down	down	down	down	down	down	down	down	down
Q17688	erp-44.2	Endoplasmic reticulum resident protein 44.2	-0.919	-0.968	-1.229	-1.224	-1.269	-1.219	-0.694	-0.876	-0.936	-1.234	-0.81	-1.133	-0.868	-1.292	down	down	down	down	down	down	down	down	down	down	down	down	down	down
A0A078BQL1	CELE_Y41E3.7	Uncharacterized protein	-0.751	-0.809	-1.197	-1.366	-0.886	-0.907	-0.653	-0.807	-1.009	-0.902	-0.948	-0.732	-0.912	-0.904	down	down	down	down	down	down	down	down	down	down	down	down	down	down
O16740	btb-7	BTB domain-containing protein	1.348	1.597	2.076	1.933	2.086	1.809	0.88	0.773	1.428	1.045	1.76	1.718	1.252	1.749	up	up	up	up	up	up	up	up	up	up	up	up	up	up
Q93714	idha-1	Probable isocitrate dehydrogenase [NAD] subunit alpha, mitochondrial	-1.111	-1.287	-0.993	-0.902	-0.938	-0.739	-0.56	-0.861	-0.871	-0.578	-0.954	-0.872	-1.289	-1.163	down	down	down	down	down	down	down	down	down	down	down	down	down	down
P75990	bluF	Blue light- and temperature-regulated antirepressor BluF	1.064	3.373	1.921	2.555	2.215	1.728	2.575	1.099	1.83	0.334	1.322	1.279	2	1.429		up	up	up	up	up	up
D7SFI3	C02D5.4	Glutathione S-transferase omega	-0.747	-0.629	-0.904	-0.86	-1.062	-0.959	-0.589	-0.366	-0.511	-0.725	-0.194	-0.578	-0.402	-0.984	down	down	down	down	down	down	down		down	down		down		down
P45971	ostb-1	Dolichyl-diphosphooligosaccharide--protein glycosyltransferase 48 kDa subunit	-0.627	-0.587	-0.657	-0.688	-0.578	-0.409	-0.429	-0.564	-0.494	-0.444	-0.753	-0.365	-0.637	-0.727	down	down	down	down	down	down	down	down	down	down	down	down	down	down
Q09407	K07E1.1	Probable inactive acireductone dioxygenase 2	-2.666	-3.825	-2.873	-3.393	-2.897	-3.272	-1.478	-1.81	-2.347	-2.473	-2.558	-3.394	-4.401	-3.404	down	down	down	down	down	down	down	down	down	down	down	down	down	down
Q19527	CELE_F17C8.3	Uncharacterized protein	0.328	0.093	0.347	-0.379	0.153	0.129	-1.129	-0.384	-0.156	0.176	-0.191	0.383	-0.041	-0.228							down
G5ECD6	chs-1	Chitin synthase chs-1	0.729	0.539	1.073	1.128	1.281	0.962	0.725	1.072	1.074	1.373	0.922	0.875	0.57	0.861	up		up	up	up	up	up	up	up	up	up	up		up
G5EFH8	cbs-1	PALP domain-containing protein	-0.888	-0.465	-0.514	-0.702	-0.537	-0.618	-0.391	-0.738	-0.884	-1.096	-1.08	-1.124	-0.998	-1.176	down	down	down	down	down	down	down	down	down	down	down	down	down	down
Q18841	rfc-1	Replication factor C subunit 1	1.112	0.888	1.57	1.596	1.511	1.827	0.696	0.688	0.714	0.717	0.767	0.344	1.394	1.109	up	up	up	up	up	up	up	up	up	up	up		up	up
Q19554	abcf-1	ABC transporter, class F	-0.815	-0.949	-0.834	-0.865	-0.751	-0.732	-0.266	-0.454	-0.59	-0.579	-0.812	-0.731	-0.927	-0.833	down	down	down	down	down	down	down	down	down	down	down	down	down	down
Q22515	CELE_T14G8.3	Uncharacterized protein	-1.105	-1.026	-0.939	-0.987	-0.917	-1.071	-0.366	-0.353	-0.651	-0.502	-0.751	-0.869	-0.908	-1.115	down	down	down	down	down	down	down	down	down	down	down	down	down	down
P34344	tag-250	Putative protein tag-250	-0.745	-0.733	-0.824	-0.976	-0.578	-0.938	-0.555	-0.734	-0.753	-0.681	-0.824	-0.891	-0.988	-1.051	down	down	down	down	down	down	down	down	down	down	down	down	down	down
Q22370	ucr-2.2	Peptidase_M16 domain-containing protein	-1.261	-1.353	-1.844	-2.197	-2.15	-2.257	-0.499	-0.592	-0.723	-0.75	-0.946	-0.75	-1.238	-1.502	down	down	down	down	down	down	down	down	down	down	down	down	down	down
Q23057	ssq-2	Sperm-Specific family, class Q	-4.179	-2.866	-2.825	-2.514	-2.604	-2.483	-1.597	-3.61	-3.374	-2.677	-3.102	-3.116	-2.135	-2.838	down	down	down	down	down	down	down	down	down	down	down	down	down	down
Q4R118	C18H7.11	Uncharacterized protein	0.603	1.239	0.793	0.979	1.532	1.286	-1.231	-0.571	0.513	0.605	0.628	0.779	0.372	1.026		up	up	up	up	up	down							up
O62305	unc-43	Calcium/calmodulin-dependent protein kinase type II	-0.711	-0.566	-0.896	-1.268	-1.023	-1.271	-0.447	-0.61	-0.635	-0.305	-0.524	-0.6	-0.679	-0.71	down	down	down	down	down	down	down	down	down		down	down	down	down
A5JYU6	lmd-1	LysM domain-containing protein	-1.04	-0.819	-0.692	-0.889	-0.791	-0.778	-0.665	-0.731	-0.82	-0.543	-0.714	-0.608	-0.729	-0.824	down	down	down	down	down	down	down	down	down		down	down	down	down
Q23402	ZK1127.4	Protein BCCIP homolog	-0.838	-1.499	-1.112	-1.241	-1.205	-1.219	-0.537	-1.032	-1.167	-1.494	-1.341	-1.271	-1.519	-1.29	down	down	down	down	down	down	down	down	down	down	down	down	down	down
O45146	era-1	Embryonic mRna (mRNA) Anterior	-0.012	-0.569	1.87	2.066	1.785	1.88	1.958	0.475	-0.534	-0.75	-1.413	-0.254	-1.781	-0.781			up	up	up	up	up				down		down
P53588	suca-1	Succinate--CoA ligase [ADP-forming] subunit beta, mitochondrial	-1.14	-1.228	-1.756	-1.91	-1.93	-1.704	-0.677	-0.843	-1.025	-0.77	-0.9	-0.791	-1.212	-1.501	down	down	down	down	down	down	down	down	down	down	down	down	down	down
Q23266	CELE_ZC374.2	Uncharacterized protein	-0.099	-0.169	0.144	0.149	0.358	-0.039	-0.682	-0.497	-0.396	0.287	-0.251	0.046	-0.216	-0.161							down
Q94177	paqr-1	Progestin and adipoQ receptor-like protein 1	0.116	0.127	0.586	0.588	0.782	0.692	0.632	0.654	0.384	0.472	0.343	0.496	0.33	0.149			up	up	up	up	up	up				up
Q20966	rbm-17	Splicing factor 45	0.202	0.135	0.284	0.215	0.38	0.632	-0.505	-0.31	-0.31	-0.19	-0.372	-0.344	-0.042	-0.319					up	up	down				down
Q20793	CELE_F54F7.6	Uncharacterized protein	1.11	1.058	0.645	1.735	0.83	2.013	1.755	1.664	1.511	1.875	1.394	1.307	1.441	0.706				up		up	up	up	up	up	up		up
K8F807	nish-1	PX domain-containing protein	1.083	1.185	1.333	1.373	1.436	1.168	0.415	0.635	0.972	0.933	1.156	0.833	1.081	1.261	up	up	up	up	up	up	up	up	up	up	up	up	up	up
A0A1N7SYP3	vab-10	GAR domain-containing protein	0.018	0.169	0.114	0.191	0.137	0.211	-0.284	-0.309	-0.312	-0.258	-0.229	-0.119	-0.138	-0.152				up		up	down	down	down	down	down
P90850	F26E4.3	Uncharacterized peptidase C1-like protein F26E4.3	0.018	0.288	-0.131	0.016	0.246	0.421	-0.578	-0.324	-0.459	0.172	-0.292	-0.088	-0.059	0.092						up	down		down
G5ECZ0	hum-5	Heavy chain, Unconventional Myosin	-0.864	-0.543	-0.879	-1.018	-0.72	-0.81	-0.532	-0.447	-0.555	-0.405	-0.508	-0.549	-0.681	-1.019	down	down	down	down	down	down	down	down	down		down	down	down	down
C0VXV6	mrpl-46	Nudix hydrolase domain-containing protein	-1.444	-1.608	-1.633	-1.57	-1.414	-1.694	-0.671	-0.918	-1.062	-0.891	-1.443	-1.213	-1.42	-1.359	down	down	down	down	down	down	down	down	down	down	down	down	down	down
Q9N538	dhs-9	DeHydrogenases, Short chain	-0.221	-0.205	-0.784	-1.088	-0.784	-0.793	-0.508	-0.445	-0.128	-0.113	0.069	-0.116	-0.305	-0.528			down	down	down	down	down	down						down
Q93315	cytb-5.1	Cytochrome b5 heme-binding domain-containing protein	-6.271	-5.475	-5.364	-4.876	-4.916	-3.754	-2.82	-4.355	-6.063	-7.177	-4.461	-5.544	-5.99	-6.835	down	down	down	down	down	down	down	down	down	down	down	down	down	down
P34567	gtf-2H2C	General transcription factor IIH subunit 2	1.642	1.544	1.843	1.948	2.011	1.994	1.131	0.773	1.751	1.692	1.222	1.816	1.707	1.934	up	up	up	up	up	up	up		up	up	up	up	up	up
O16517	atp-4	ATP synthase-coupling factor 6, mitochondrial	-0.892	-0.958	-1.459	-1.469	-1.673	-1.68	-0.491	-0.6	-0.796	-0.778	-0.599	-0.709	-0.951	-1.113	down	down	down	down	down	down	down	down	down	down	down	down	down	down
Q966A6	CELE_Y58A7A.3	IBR domain-containing protein	3.258	2.921	2.984	2.523	3.189	3.324	1.664	1.804	2.705	2.752	1.861	2.657	2.936	2.686	up	up	up	up	up	up	up	up	up	up	up	up	up	up
Q21381	CELE_K09C4.5	MFS domain-containing protein	-0.196	1.167	0.41	0.896	1.056	0.769	1.973	2.343	1.624	1.456	2.614	1.273	1.583	0.109							up	up	up		up
Q18167	smz-1	Sperm Meiosis PDZ domain containing proteins	-4.92	-3.949	-4.675	-4.302	-4.981	-4.668	-1.949	-3.828	-4.139	-4.913	-5.156	-5.373	-4.61	-5.467	down	down	down	down	down	down	down	down	down	down	down	down	down	down
Q9XW38	nsph-3.1	Nematode Specific Peptide family	-5.491	-4.419	-4.832	-4.82	-5.151	-3.879	-2.303	-5.154	-5.941	-4.521	-4.797	-5.71	-4.819	-5.993	down	down	down	down	down	down	down	down	down	down	down	down	down	down
O62137	acox-1.2	Acyl-coenzyme A oxidase acox-1.2	-2.541	-1.939	-2.736	-2.957	-2.892	-3.227	-1.235	-0.628	-1.19	-0.699	-1.166	-1.255	-1.926	-2.328	down	down	down	down	down	down	down		down		down	down	down	down
O62218	pole-1	DNA polymerase epsilon catalytic subunit	1.047	1.178	1.53	1.537	1.399	1.364	0.512	0.726	0.962	1.001	1.027	0.866	1.114	1.375	up	up	up	up	up	up	up	up	up	up	up	up	up	up
Q09589	hira-1	Protein HIRA	0.708	0.729	1.132	1.199	1.126	1.192	0.444	0.324	0.34	0.574	0.549	0.324	0.876	0.643	up	up	up	up	up	up	up		up	up	up		up	up
Q20447	CELE_F46B6.6	Tr-type G domain-containing protein	-0.291	-0.218	0.011	-0.048	0.225	-0.083	-0.476	-0.361	-0.336	0.04	-0.488	-0.147	-0.342	-0.404							down				down			down
Q10653	cyb-1	G2/mitotic-specific cyclin-B1	1.191	0.928	1.618	1.84	1.701	1.809	0.647	0.954	0.872	0.964	0.878	0.925	1.067	1.419	up	up	up	up	up	up	up	up	up	up	up	up	up	up
H2KZQ8	sec-16a.2	Protein transport protein sec16	-0.955	-0.832	-0.664	-0.65	-0.754	-0.729	-0.412	-0.492	-0.571	-0.407	-0.682	-0.641	-0.607	-0.945	down	down	down	down	down	down	down	down	down	down	down	down	down	down
P0A8N3	lysS	Lysine--tRNA ligase	-0.633	2.25	0.298	0.542	0.235	0.025	-2.787	-0.944	0.005	-0.799	0.508	0.672	1.002	0.17							down
P34601	ZK1098.2	Uncharacterized protein ZK1098.2	-0.852	-0.649	-0.271	-0.388	-0.473	-0.293	-0.717	-0.859	-1.268	-0.864	-1.498	-0.84	-0.325	-0.537	down	down			down		down	down	down	down	down	down
Q9XTR1	cdk-4	Cyclin-dependent kinase 4 homolog	2.275	1.49	2.532	1.502	1.916	1.959	2.261	2.106	1.764	1.573	2.102	0.98	2.495	1.564	up		up	up	up	up	up	up	up		up		up
P34260	vps-33.1	Vacuolar protein sorting-associated protein 33A	0.486	0.544	0.813	0.823	0.912	0.769	0.448	0.519	0.825	0.907	0.719	0.816	0.623	0.861	up	up	up	up	up	up	up	up	up	up	up	up	up	up
Q23098	nuo-6	NADH dehydrogenase [ubiquinone] 1 beta subcomplex subunit 4	-0.865	-0.984	-1.157	-1.156	-1.124	-1.18	-0.364	-0.41	-0.685	-0.329	-0.895	-0.718	-0.97	-0.8	down	down	down	down	down	down	down	down	down	down	down	down	down	down
Q19579	pab-2	Polyadenylate-binding protein	-0.882	-0.974	-1.069	-1.342	-1.213	-1.164	-0.448	-0.472	-0.641	-0.776	-0.694	-0.884	-0.732	-1.203	down	down	down	down	down	down	down	down	down	down	down	down	down	down
P21137	kin-1	cAMP-dependent protein kinase catalytic subunit	-0.506	-0.252	-0.536	-0.65	-0.66	-0.606	-0.392	-0.536	-0.306	-0.23	-0.36	-0.306	-0.346	-0.547	down		down	down	down	down	down	down	down		down		down	down
G5ED94	3A339	3A339	-0.929	-0.927	-1.211	-0.827	-0.766	-1.077	-1.296	-0.742	-0.422	-0.587	-1.041	-0.857	-1.113	-2.008			down	down		down	down				down		down	down
Q9XVR6	otub-1	Ubiquitin thioesterase otubain-like	-0.109	0.304	0.484	0.236	0.475	0.357	0.594	0.702	0.513	0.554	0.595	0.617	0.127	0.283			up		up		up	up	up	up	up	up
H2L083	grl-16	Ground-like domain-containing protein	-1.61	-1.491	-1.445	-1.689	-1.581	-0.934	-1.035	-1.305	-1.314	-1.365	-1.361	-1.612	-1.285	-1.463	down	down	down	down	down	down	down	down	down	down	down	down	down	down
Q9TZ51	far-7	Fatty Acid/Retinol binding protein	-0.641	0.176	0.299	-0.197	0.123	0.31	-1.275	-1.226	-0.749	-0.584	-0.549	-0.32	-0.592	-0.371							down	down
P34328	hsp-12.2	Heat shock protein Hsp-12.2	-2.049	-1.79	-1.723	-1.775	-1.55	-1.582	-0.805	-1.454	-1.863	-2.045	-2.171	-1.941	-2.278	-2.158	down	down	down	down	down	down	down	down	down	down	down	down	down	down
Q18099	C18F10.7	ANK_REP_REGION domain-containing protein	0.641	0.77	0.638	0.679	0.753	0.594	0.542	0.732	0.786	1.033	0.831	0.928	0.83	0.824	up	up	up	up	up	up	up	up	up	up	up	up	up	up
Q21939	mrpl-49	Probable 39S ribosomal protein L49, mitochondrial	-1.039	-0.944	-0.654	-0.729	-0.68	-0.791	-0.46	-0.306	-0.385	-0.204	-0.705	-0.775	-0.941	-0.549	down	down	down	down	down	down	down		down		down	down	down	down
A8WHS3	CELE_F23B12.4	Uncharacterized protein	-2.212	-2.206	-2.323	-2.096	-2.272	-2.146	-0.695	-1.181	-1.561	-1.809	-1.829	-1.882	-2.133	-2.413	down	down	down	down	down	down	down	down	down	down	down	down	down	down
Q03600	ina-1	Integrin alpha ina-1	0.26	0.434	0.287	0.139	0.358	0.401	-0.339	-0.224	-0.22	-0.321	0.012	-0.002	0.197	0.093		up	up		up	up	down			down
O45110	mrpl-2	Ribosomal_L2_C domain-containing protein	-0.783	-0.95	-1.487	-1.559	-1.419	-1.619	-0.368	-0.384	-0.411	-0.282	-0.67	-0.679	-0.814	-0.779	down	down	down	down	down	down	down	down	down		down	down	down	down
O62213	cey-1	CSD domain-containing protein	-1.538	-1.663	-1.289	-1.41	-1.432	-1.279	-1.11	-1.744	-1.462	-2.518	-1.276	-1.809	-1.491	-1.82	down	down	down	down	down	down	down	down	down	down	down	down	down	down
Q21408	spc-1	SPeCtrin	0.421	0.521	0.683	0.803	0.754	0.908	-0.335	-0.291	-0.19	-0.113	0.035	0.208	0.322	0.336	up	up	up	up	up	up	down	down					up	up
Q9GYK9	tre-2	Trehalase	-0.777	-0.729	-0.81	-0.998	-0.644	-1.053	-0.629	-0.693	-0.623	-0.4	-0.648	-0.311	-0.701	-0.691	down	down	down	down	down	down	down	down	down		down		down	down
Q09475	C28H8.3	Uncharacterized helicase C28H8.3	-0.795	-0.802	-0.861	-0.78	-0.804	-0.815	-0.312	-0.561	-0.67	-0.695	-0.711	-0.828	-0.865	-0.787	down	down	down	down	down	down	down	down	down	down	down	down	down	down
Q23447	CELE_ZK180.6	Uncharacterized protein	-2.243	-1.841	-2.467	-2.471	-2.192	-1.768	-1.065	-1.525	-1.916	-1.399	-1.838	-1.767	-1.858	-1.948	down	down	down	down	down	down	down	down	down	down	down	down	down	down
Q23606	CELE_ZK813.1	Uncharacterized protein	-2.484	-2.392	1.11	1.73	1.483	1.942	-2.828	-3.231	-5.083	-4.81	-4.94	-3.329	-3.048	-3.216	down	down				up	down	down	down	down	down	down	down	down
H2KYE1	CELE_R11G1.6	Uncharacterized protein	-0.981	-1.129	-0.839	-1.068	-0.989	-1.186	-0.607	-0.89	-0.874	-0.636	-0.898	-0.597	-1.017	-0.778	down	down	down	down	down	down	down	down	down	down	down	down	down	down
Q22137	CELE_T04A8.7	1,4-alpha-glucan branching enzyme	0.227	0.294	0.034	0.059	0.141	0.244	0.357	0.357	0.397	0.432	0.454	0.302	0.188	0.365						up	up	up	up	up	up	up		up
Q19175	pho-13	Intestinal acid PHOsphatase	-4.167	-3.979	-3.439	-3.618	-3.328	-3.436	-1.341	-2.357	-3.632	-3.282	-3.746	-3.581	-4.265	-4.456	down	down	down	down	down	down	down	down	down	down	down	down	down	down
Q9XXR4	ttr-24	TransThyretin-Related family domain	0.317	0.295	0.451	0.898	0.579	0.596	-1.023	-1.079	-0.844	-0.536	-0.619	-0.166	0.208	0.196				up			down	down	down
H8W3Y2	frm-5.1	FERM domain (Protein4.1-ezrin-radixin-moesin) family	-0.17	0.047	0.099	0.018	0.152	0.21	-0.464	-0.458	-0.415	-0.355	-0.333	-0.23	-0.079	-0.1							down	down	down
Q23551	unc-22	Twitchin	-0.432	-0.373	-0.678	-0.728	-0.864	-0.953	-0.398	-0.581	-0.453	-0.279	-0.378	-0.22	-0.445	-0.429	down	down	down	down	down	down	down	down	down		down		down	down
P41949	D1044.1	Uncharacterized kinase-like protein D1044.1	-1.916	-1.516	-2.272	-2.835	-2.441	-2.327	-0.878	-0.816	-1.044	-1.106	-1.391	-1.245	-1.196	-1.801	down	down	down	down	down	down	down	down	down	down	down	down	down	down
G5EC27	gna-2	Glucosamine 6-phosphate N-acetyltransferase	0.446	0.328	0.508	0.651	0.715	0.456	0.775	1.281	1.324	1.543	1.201	0.904	0.497	0.901			up	up	up		up	up	up	up	up	up		up
Q95Q98	jhdm-1	JmjC domain-containing histone demethylation protein 1	0.393	0.265	0.067	-0.023	0.041	0.257	0.439	0.21	0.164	-0.128	0.199	0.122	0.392	0.133	up						up						up
Q21105	CELE_K01H12.4	Uncharacterized protein	-1.553	-1.959	-0.235	-1.137	-1.508	-1.692	-1.94	-2.263	-2.033	-2.837	-2.798	-1.265	-2.316	-2.208		down			down	down	down	down	down	down	down		down	down
Q7YTL0	CELE_R186.8	Uncharacterized protein	-2.373	-2.311	-1.979	-2.151	-2.374	-1.701	-1.275	-1.942	-2.059	-2.489	-2.686	-2.164	-2.221	-2.74	down	down	down	down	down	down	down	down	down	down	down	down	down	down
Q19788	CELE_F25H8.2	H/ACA ribonucleoprotein complex non-core subunit NAF1	-0.869	-0.775	-0.573	-0.401	-0.293	-0.522	-0.656	-0.615	-0.89	-0.431	-0.827	-0.651	-0.693	-0.89	down	down	down			down	down	down	down		down	down	down	down
Q20546	tmed-10	GOLD domain-containing protein	-0.613	-0.524	-0.816	-0.867	-0.824	-0.833	-0.419	-0.415	-0.503	-0.417	-0.435	-0.597	-0.619	-0.633	down	down	down	down	down	down	down	down	down	down	down	down	down	down
P0AEB2	dacA	D-alanyl-D-alanine carboxypeptidase DacA	-2.084	0.85	-0.125	0.06	0.055	0.005	-1.651	-0.503	-0.773	-1.822	-0.843	-0.939	-0.635	-1.503	down						down			down				down
Q17412	B0001.3	Uncharacterized protein	-0.39	-0.052	0.342	0.459	0.328	-0.152	-0.855	-0.444	-0.113	-0.097	-0.473	-0.166	-0.086	-0.065							down
Q21601	mrps-34	Mitochondrial Ribosomal Protein, Small	-0.647	-0.845	-0.634	-0.591	-0.785	-0.854	-0.438	-0.608	-0.507	-0.543	-0.589	-0.681	-0.718	-0.595	down	down	down	down	down	down	down	down	down	down	down	down	down	down
O45819	gyg-2	GlYcoGenin like	1.677	1.549	2.285	2.506	2.339	2.564	0.689	0.59	0.913	1.458	1.046	1.073	1.429	1.857	up	up	up	up	up	up	up	up	up	up	up	up	up	up
Q9N3F2	CELE_Y54E10A.6	B3_4 domain-containing protein	-0.544	-0.495	-0.428	-0.537	-0.477	-0.542	-0.438	-0.606	-0.515	-0.373	-0.661	-0.498	-0.54	-0.447	down	down	down	down	down	down	down	down	down		down	down	down	down
P34556	cdk-1	Cyclin-dependent kinase 1	0.543	0.514	0.851	0.901	0.738	0.796	0.563	0.461	0.421	0.379	0.561	0.285	0.812	0.69	up	up	up	up	up	up	up	up			up		up	up
Q09974	ttc-4	Wheel domain-containing protein	-0.684	-0.88	-0.798	-0.645	-0.747	-0.722	-0.47	-0.927	-0.922	-0.693	-0.942	-0.813	-1.004	-0.79	down	down	down	down	down	down	down	down	down	down	down	down	down	down
Q23360	vars-1	Valine--tRNA ligase	-0.458	-0.536	-0.176	-0.313	-0.302	-0.264	-0.395	-0.363	-0.405	-0.352	-0.551	-0.397	-0.685	-0.505	down	down		down	down	down	down	down	down	down	down	down	down	down
P02918	mrcA	Penicillin-binding protein 1A	-0.998	0.463	-0.052	-0.258	-0.25	-0.347	-1.62	-1.051	-1.077	-0.39	-0.467	-0.742	-0.75	-0.109							down
Q93540	slc-25a18.1	SLC (SoLute Carrier) homolog	-1.209	-1.138	-1.76	-2.023	-1.821	-1.886	-0.651	-0.824	-0.853	-0.773	-0.834	-0.681	-1.292	-1.383	down	down	down	down	down	down	down	down	down	down	down	down	down	down
Q95ZS1	gfi-2	ANK_REP_REGION domain-containing protein	0.354	-0.04	0.436	0.448	0.418	0.53	-0.446	-0.63	-0.174	-0.104	-0.021	0.1	0.047	-0.031			up	up	up	up	down	down
Q7YZG7	CELE_Y55B1AR.2	Uncharacterized protein	1.727	1.391	2.129	2.3	2.442	2.466	1.349	1.329	1.577	1.4	1.916	1.459	1.452	1.396	up	up	up	up	up	up	up	up	up	up	up	up	up	up
P77499	sufC	Probable ATP-dependent transporter SufC	-0.541	2.668	-0.632	0.628	-0.155	0.424	-2.616	-1.328	-0.056	-1.06	0.728	0.739	1.227	-0.89		up					down
G5EG58	pgp-9	p-GlycoProtein related	-1.587	-0.481	-1.025	-1.042	-0.848	-0.965	-0.901	-0.783	-0.609	-0.364	-1.443	-0.663	-1.132	-1.462	down		down	down	down	down	down	down			down		down	down
G5EG59	crn-5	Cell death-related nuclease 5	-2.775	-1.288	-3.417	-3.239	-3.925	-2.907	-2.347	-3.29	-2.539	-3.626	-2.954	-3.07	-2.452	-3.262	down		down	down	down	down	down	down	down	down	down	down	down	down
Q18877	C56A3.5	Uncharacterized protein	-0.629	-0.997	-0.537	-0.486	-0.501	-0.409	-0.463	-0.824	-0.576	-0.448	-0.669	-0.661	-0.813	-0.569	down	down	down	down	down	down	down	down	down	down	down	down	down	down
O17754	egl-21	Carboxypeptidase E	-0.274	0.336	-0.13	-0.136	-0.026	0.001	-0.529	-0.435	-0.188	-0.215	-0.06	-0.238	0.026	-0.145							down	down
P52554	pfd-6	Probable prefoldin subunit 6	-0.916	-1.137	-0.92	-0.838	-0.914	-0.898	-0.477	-0.487	-0.461	-0.674	-0.802	-0.907	-0.904	-0.952	down	down	down	down	down	down	down	down	down	down	down	down	down	down
Q95Q11	mrps-7	28S ribosomal protein S7, mitochondrial	-1.062	-0.892	-0.594	-0.525	-0.583	-0.677	-0.721	-1.036	-0.704	-0.253	-1.097	-0.674	-0.932	-0.634	down	down	down	down	down	down	down	down	down		down	down	down	down
Q9TZ34	CELE_T24C4.5	DNA primase	1.285	1.008	1.154	1.026	0.919	1.231	0.581	0.6	0.734	0.798	1.004	0.721	1.192	1.146	up	up	up	up	up	up	up	up	up	up	up	up	up	up
Q95XT5	trap-1	Translocon-associated protein subunit alpha	-2.057	-2.224	-2.782	-2.608	-2.821	-2.523	-0.581	-1.046	-1.539	-1.554	-1.684	-1.98	-2.093	-1.822	down	down	down	down	down	down	down	down	down	down	down	down	down	down
Q21190	unc-1	Protein unc-1	-1.226	-0.621	-0.831	-0.486	-0.422	-0.248	-1.09	-1.569	-1.419	-1.018	-1.892	-1.566	-1.456	-1.38	down		down				down	down	down	down	down	down	down	down
Q18822	alh-10	Aldedh domain-containing protein	-0.435	-0.596	-0.909	-0.953	-0.948	-1.16	0.661	0.572	0.241	-0.228	0.068	-0.124	-0.086	-0.515		down	down	down	down	down	up	up
O01976	eri-7	Enhanced RNAI (RNA interference)	1.592	1.512	1.871	2.02	2.118	1.147	1.547	1.857	1.221	2.3	1.485	1.865	1.98	1.385	up	up	up	up	up	up	up	up	up	up	up	up	up	up
Q965X5	ugt-45	Glucuronosyltransferase	0.093	-0.003	-0.293	-0.191	-0.192	-0.075	0.659	0.501	0.197	0.425	0.314	-0.115	0.142	-0.04							up
Q23389	CELE_ZK1067.3	Uncharacterized protein	1.339	0.892	1.462	1.537	1.341	1.557	0.754	0.643	0.664	0.817	1.17	0.72	1.369	1.226	up	up	up	up	up	up	up	up	up	up	up	up	up	up
O45386	CELE_F21H7.5	Major sperm protein	-3.772	-4.377	-3.881	-3.599	-2.525	-3.125	-2.158	-4.226	-4.289	-2.219	-4.416	-3.299	-3.759	-4.128	down	down	down	down	down	down	down	down	down	down	down	down	down	down
Q19093	CELE_F01F1.2	COX assembly mitochondrial protein	-1.123	-1.189	-1.409	-1.295	-1.401	-1.457	-0.465	-0.73	-0.819	-0.832	-0.851	-0.717	-1.224	-1.013	down	down	down	down	down	down	down	down	down	down	down	down	down	down
Q95XJ0	CELE_Y69A2AR.18	Uncharacterized protein	-1.004	-1.23	-1.161	-1.062	-1.316	-1.235	-0.463	-0.757	-0.772	-1.045	-0.873	-0.956	-1.161	-1.221	down	down	down	down	down	down	down	down	down	down	down	down	down	down
G5EFF7	ubql-1	Ubiquilin	-0.546	-0.529	-0.241	-0.164	-0.292	-0.19	-0.35	-0.509	-0.713	-0.651	-0.639	-0.684	-0.65	-0.643	down	down	down		down		down	down	down	down	down	down	down	down
O02323	lbp-7	Fatty acid-binding protein homolog 7	-2.26	-2.341	-3.139	-3.09	-3.188	-3.143	-0.808	-1.186	-1.717	-1.803	-1.925	-1.733	-2.074	-3.02	down	down	down	down	down	down	down	down	down	down	down	down	down	down
G5EE16	C44H4.4	Chorein_N domain-containing protein	-0.593	-0.148	-0.072	0.045	0.039	-0.016	-0.48	-0.385	-0.452	-0.351	-0.417	-0.362	-0.264	-0.725	down						down	down	down		down			down
O76367	cox-6c	COX6C domain-containing protein	-1.241	-1.212	-1.238	-1.123	-1.243	-1.003	-0.987	-0.286	-1.097	-0.527	-1.091	-0.939	-1.17	-1.241	down	down	down	down	down	down	down		down		down	down	down	down
Q95XR0	eif-2gamma	Protein-synthesizing GTPase	-1.236	-1.135	-1.58	-1.421	-1.37	-1.444	-0.465	-0.762	-1.033	-1.072	-1.12	-1.398	-1.247	-1.208	down	down	down	down	down	down	down	down	down	down	down	down	down	down
P91240	srpa-72	Signal recognition particle subunit SRP72	-1.183	-1.282	-1.203	-1.277	-1.253	-1.206	-0.286	-0.402	-0.688	-0.801	-0.885	-1.078	-1.183	-1.17	down	down	down	down	down	down	down	down	down	down	down	down	down	down
Q94216	dnj-11	DnaJ homolog subfamily C member 2	-0.956	-0.923	-1.132	-1.129	-1.175	-1.198	-0.251	-0.434	-0.542	-0.622	-0.679	-0.821	-0.861	-0.847	down	down	down	down	down	down	down	down	down	down	down	down	down	down
Q9TXV7	F52C12.1	Probable tyrosyl-DNA phosphodiesterase	1.907	1.928	2.096	1.472	2.118	2.556	1.363	1.554	1.457	1.641	1.981	1.801	2.153	1.835	up	up	up	up	up	up	up	up	up	up	up	up	up	up
Q8IG39	adal-1	Adenosine deaminase-like protein	1.753	1.856	2.238	2.377	2.264	2.462	1.264	1.119	0.186	0.357	0.998	0.985	1.637	1.939	up	up	up	up	up	up	up	up			up		up	up
Q9U2M9	CELE_Y37H9A.1	Uncharacterized protein	-1.282	-1.792	-2.264	-2.442	-1.965	-2.139	-1.713	-0.645	-1.595	-2.267	-1.248	-1.702	-1.639	-1.014		down	down	down	down	down	down		down	down		down	down
A0A061AD47	tag-273	LIM zinc-binding domain-containing protein	-0.212	-0.183	-0.414	-0.656	-0.541	-0.869	-0.576	-0.559	-0.593	-0.488	-0.255	-0.377	-0.385	-0.363			down	down	down	down	down	down	down
Q11188	popl-1	Ribonucleases P/MRP protein subunit popl-1	-0.745	-0.736	-0.78	-0.511	-0.594	-0.458	-0.503	-0.701	-0.712	-0.947	-0.804	-0.693	-0.791	-0.916	down	down	down	down	down	down	down	down	down	down	down	down	down	down
Q09456	col-80	Putative cuticle collagen 80	-5.965	-5.599	-5.597	-5.808	-4.914	-4.997	-1.568	-2.482	-3.131	-3.658	-6.198	-5.177	-6.222	-6.034	down	down	down	down	down	down	down	down	down	down	down	down	down	down
Q23186	CELE_W06A7.2	Uncharacterized protein	-2.078	-1.259	-1.417	-1.323	-1.272	-0.714	-1.051	-1.466	-1.502	-1.04	-1.549	-1.359	-1.388	-1.279	down	down	down	down	down	down	down	down	down	down	down	down	down	down
Q93873	gas-1	Probable NADH dehydrogenase [ubiquinone] iron-sulfur protein 2, mitochondrial	-0.972	-1.233	-1.384	-1.568	-1.447	-1.576	-0.514	-0.696	-0.797	-0.96	-0.91	-0.705	-1.243	-1.188	down	down	down	down	down	down	down	down	down	down	down	down	down	down
O62188	CELE_F31B9.3	Uncharacterized protein	0.578	0.472	-0.055	0.716	0.381	0.237	1.827	1.105	1.532	-0.036	1.721	0.281	0.549	0.473							up		up		up
P09151	leuA	2-isopropylmalate synthase	0.234	1.092	-0.342	-0.133	0.592	-0.088	-1.917	-1.34	-1.159	-1.302	1.044	-1.199	-0.355	1.019							down
Q03564	B0464.6	Uncharacterized protein B0464.6	0.378	0.304	0.428	0.345	0.371	0.228	0.416	0.338	0.299	0.442	0.214	0.148	0.445	0.587	up		up	up	up		up	up		up			up	up
G5EDV0	CELE_E01G4.6	Uncharacterized protein	-4.544	-4.36	-4.524	-3.017	-3.253	-3.606	-2.386	-3.86	-4.542	-4.294	-4.607	-4.297	-5.031	-5.883	down	down	down	down	down	down	down	down	down	down	down	down	down	down
Q8MQC8	cest-9.2	Carboxylic ester hydrolase	-0.137	-0.25	-0.261	-0.444	-0.157	-0.034	-1.113	-1.13	-0.745	-1.438	-0.524	-0.748	-0.381	-0.563							down	down		down
P52821	rps-25	40S ribosomal protein S25	-1.512	-1.998	-1.531	-1.391	-1.415	-1.558	-0.696	-0.923	-1.24	-0.829	-1.442	-1.21	-1.981	-1.533	down	down	down	down	down	down	down	down	down	down	down	down	down	down
G5EDB8	vha-4	V-type proton ATPase 21 kDa proteolipid subunit c''	-2.006	-3.734	-3.422	-3.952	-3.633	-4.047	-2.457	-3.415	-4.948	-4.596	-2.48	-4.149	-4.595	-3.376		down	down	down	down	down	down	down	down	down	down	down	down	down
Q20964	lys-4	LYSozyme	-5.67	-5.975	-5.223	-5.197	-5.511	-4.676	-1.977	-1.999	-1.89	-1.496	-3.655	-4.351	-4.216	-4.063	down	down	down	down	down	down	down	down	down		down	down	down	down
B3WFT8	C14F11.4	Uncharacterized protein	-0.031	-0.115	-0.352	-0.324	-0.338	-0.303	-0.409	-0.562	-0.592	-0.402	-0.128	-0.167	-0.268	-0.343			down	down	down	down	down	down	down	down
P34439	F54C8.1	Probable 3-hydroxyacyl-CoA dehydrogenase F54C8.1	-2.697	-2.108	-1.943	-2.819	-2.04	-2.104	-1.323	-2.312	-1.649	-1.831	-1.954	-2.261	-2.165	-2.453	down	down	down	down	down	down	down	down	down	down	down	down	down	down
O17915	ran-1	GTP-binding nuclear protein ran-1	-0.821	-1.115	-0.529	-0.417	-0.585	-0.179	-0.511	-0.903	-1.21	-1.384	-1.19	-1.149	-1.012	-0.949	down	down	down	down	down		down	down	down	down	down	down	down	down
Q9N4F4	gpa-17	G Protein, Alpha subunit	-0.72	-0.646	-0.49	-0.827	-0.549	-0.852	-0.698	-0.642	-0.44	-0.348	-0.494	-0.701	-0.587	-0.667	down	down	down	down	down	down	down	down				down		down
Q95X60	gpaa-1	GlycosylPhosphatidylinositol Anchor Attachment 1 homolog	-0.592	-0.637	-0.088	-0.069	0.005	-0.1	-0.579	-0.572	-0.637	-0.532	-0.428	-0.539	-0.202	-0.518	down	down					down	down	down	down	down	down		down
Q9XUU9	K05C4.2	Protein jagunal homolog	-2.347	-2.2	-2.156	-2.163	-2.356	-2.038	-0.594	-0.891	-1.381	-1.345	-1.441	-1.635	-1.84	-2.103	down	down	down	down	down	down	down	down	down	down	down	down	down	down
Q9N4H7	copa-1	Coatomer subunit alpha	-0.51	-0.333	-0.505	-0.652	-0.492	-0.553	-0.317	-0.258	-0.378	-0.257	-0.369	-0.508	-0.49	-0.451	down	down	down	down	down	down	down	down	down		down	down	down	down
H8ESG1	ego-2	BRO1 domain-containing protein	-0.182	-0.234	-0.273	-0.48	-0.405	-0.327	-0.374	-0.329	-0.249	-0.295	-0.153	-0.181	-0.182	-0.244			down	down	down	down	down	down
Q21693	ife-2	Eukaryotic translation initiation factor 4E-2	-0.724	-0.699	-0.706	-0.878	-0.704	-0.834	-0.35	-0.323	-0.551	-0.432	-0.464	-0.693	-0.651	-0.832	down	down	down	down	down	down	down	down	down	down	down	down	down	down
G5EDB7	unc-25	Glutamic acid decarboxylase	0.107	0.161	-0.133	-0.135	-0.106	-0.1	-0.523	-0.594	-0.657	-0.42	0.013	0.152	0.014	0.047							down	down	down
K8FDZ1	C07E3.3	Uncharacterized protein	0.476	0.578	1.24	1.023	1.449	1.044	-0.856	-0.586	-0.386	0.864	-0.026	0.244	0.28	0.406			up	up	up	up	down			up
Q7Z151	fnci-1	FANCI_HD2 domain-containing protein	0.662	1.311	0.742	0.788	0.878	1.052	0.975	0.615	0.732	0.685	0.962	0.088	1.406	1.213		up	up	up	up	up	up				up		up	up
O44480	rpl-20	60S ribosomal protein L18a	-1.174	-1.372	-1.401	-1.372	-1.173	-1.423	-0.4	-0.602	-0.76	-0.787	-1.057	-1.06	-1.37	-1.125	down	down	down	down	down	down	down	down	down	down	down	down	down	down
G5EG90;G5EGJ4	fbxc-2	F-box C protein	-0.638	-1.8	-0.831	-0.822	-1.062	-0.919	-1.711	-0.391	-0.357	-1.345	-0.485	-1.092	-0.619	-1.59		down					down							down
G5EBJ8	CELE_Y59E9AR.1	Major sperm protein	-5.793	-6.242	-5.553	-5.664	-5.755	-4.969	-2.289	-5.99	-6.861	-6.124	-7.184	-6.203	-6.51	-6.476	down	down	down	down	down	down	down	down	down	down	down	down	down	down
Q7K7C1	CELE_Y106G6D.8	Activin_recp domain-containing protein	0.759	0.141	1.748	1.222	1.224	1.27	-1.446	-1.596	-2.112	-1.934	-1.493	-0.221	-0.741	-0.465			up	up	up	up	down	down	down	down	down
W6RQZ3	nprl-2	Nitrogen Permease Regulator Like homolog	1.679	1.246	1.932	1.749	1.64	2.607	1.964	1.975	1.221	0.116	1.128	0.452	2.295	1.057			up	up	up	up	up	up					up
Q9TYM6	Y48A5A.1	Protein SHQ1 homolog	-0.671	-0.738	-0.078	0.131	0.057	0.192	-0.527	-0.703	-0.809	-0.692	-0.428	-0.712	-0.602	-0.619	down	down					down	down	down	down	down	down	down	down
O44887	inx-13	Innexin	-0.453	-0.592	0.105	0.349	0.156	0.36	-0.726	-0.689	-0.944	-0.539	-0.936	-0.506	-0.728	-0.618							down	down	down		down		down
Q9N5S7	txdc-12.2	ThioredoXin Domain Containing protein homolog	-2.788	-3.124	-3.914	-4.415	-4.109	-3.72	-1.098	-1.544	-1.626	-1.726	-1.47	-2.612	-2.463	-3.281	down	down	down	down	down	down	down	down	down	down	down	down	down	down
Q09510	mlc-4	Myosin regulatory light chain	-1.359	-1.792	-0.78	-1.099	-0.973	-0.588	-1.001	-1.726	-2.138	-2.249	-1.828	-1.735	-1.812	-1.682	down	down	down	down	down		down	down	down	down	down	down	down	down
O44175	rfc-2	AAA domain-containing protein	0.132	0.231	0.778	0.914	0.865	1.037	0.465	-0.001	-0.106	-0.051	-0.194	0.021	-0.143	0.292			up	up	up	up	up
Q21925	pges-2	Prostaglandin E synthase 2	-1.692	-1.849	-2.376	-2.273	-2.272	-2.348	-0.613	-0.988	-1.126	-1.283	-1.236	-1.425	-1.872	-1.624	down	down	down	down	down	down	down	down	down	down	down	down	down	down
Q9U2K4	CELE_Y39E4B.6	Uncharacterized protein	-2.253	-2.006	-1.534	-1.945	-1.677	-1.742	-1.456	-1.562	-2.755	-2.536	-1.226	-2.11	-1.521	-2.659	down	down	down	down	down	down	down	down	down	down	down	down	down	down
O01861	vet-1	Very Early Transcript	1.711	2.347	1.145	0.779	1.646	1.683	2.059	2.137	0.206	0.731	0.012	2.059	1.613	1.579		up			up	up	up	up				up
O02328	eif-3.C	Eukaryotic translation initiation factor 3 subunit C	-0.685	-0.834	-0.711	-0.716	-0.722	-0.786	-0.288	-0.42	-0.496	-0.497	-0.788	-0.781	-0.932	-0.685	down	down	down	down	down	down	down	down	down	down	down	down	down	down
O45258	pals-6	Protein containing ALS2cr12 (ALS2CR12) signature	-0.329	-0.527	-0.652	-0.487	0.516	-0.481	-1.369	-1.409	-0.657	-1.221	-0.418	-0.559	-0.544	-0.543							down	down		down
P53489	arx-2	Actin-related protein 2	0.559	0.628	0.333	0.332	0.51	0.477	0.297	0.566	0.497	0.616	0.431	0.522	0.47	0.492	up	up	up	up	up	up	up	up	up	up	up	up	up	up
G5EBL8	sas-7	Uncharacterized protein	0.234	0.074	0.818	0.677	0.734	0.202	0.813	0.074	0.132	-0.171	0.231	0.23	0.335	0.622			up	up	up		up
P91309	F46F11.1	Inositol hexakisphosphate and diphosphoinositol-pentakisphosphate kinase	-0.211	-0.201	0.148	0.18	0.191	0.152	-0.3	-0.474	-0.473	-0.372	-0.321	-0.429	-0.499	-0.214					up		down	down	down	down	down	down	down
Q9GYK0	lmp-2	LAMP (Lysosome-associated membrane protein) homolog	0.056	-0.214	0.962	0.811	1.04	0.663	1.197	1.071	0.877	0.607	-0.22	0.762	0.805	0.801			up	up	up		up	up
P98080	ucr-1	Cytochrome b-c1 complex subunit 1, mitochondrial	-0.831	-0.802	-0.909	-0.93	-0.865	-0.984	-0.397	-0.503	-0.631	-0.248	-0.663	-0.549	-0.939	-0.777	down	down	down	down	down	down	down	down	down		down	down	down	down
P91128	rpl-13	60S ribosomal protein L13	-1.689	-1.974	-2.079	-1.735	-2.071	-1.844	-0.726	-1.234	-1.396	-1.086	-1.679	-1.56	-1.957	-1.655	down	down	down	down	down	down	down	down	down	down	down	down	down	down
O02141	C46G7.2	Uncharacterized protein	-0.851	-0.786	-1.726	-1.582	-1.733	-1.645	-0.523	-0.622	-0.613	-0.548	-0.717	-0.598	-0.938	-0.881	down	down	down	down	down	down	down	down	down	down	down	down	down	down
Q95XP5	mca-3	Calcium-transporting ATPase	0.055	0.058	0.003	0.109	0.21	0.217	-0.257	-0.176	-0.135	-0.035	-0.054	-0.006	-0.003	-0.051					up	up	down
Q20679	let-268	Multifunctional procollagen lysine hydroxylase and glycosyltransferase	-0.925	-0.81	-1.271	-1.559	-1.204	-1.439	-0.575	-0.607	-0.976	-0.754	-0.924	-0.901	-1.106	-1.266	down	down	down	down	down	down	down	down	down	down	down	down	down	down
Q9U2D2	cku-70	ATP-dependent DNA helicase 2 subunit 1	1.493	1.262	1.515	1.656	1.576	1.706	0.394	0.464	0.603	0.629	1.001	0.8	1.477	1.311	up	up	up	up	up	up	up	up	up	up	up	up	up	up
O76565	F13C5.5	Uncharacterized protein F13C5.5	-2.798	-2.071	-2.612	-1.723	-2.085	-2.102	-1.611	-2.078	-1.994	-2.023	-3.405	-1.985	-2.479	-2.125	down	down	down	down	down	down	down	down	down	down	down	down	down	down
Q21740	edc-3	DFDF domain-containing protein	0.433	0.36	0.818	0.767	0.818	0.69	0.462	0.685	0.794	0.591	0.769	0.363	0.666	0.824	up		up	up	up	up	up	up	up	up	up		up	up
H2KYA5	unc-82	Protein kinase domain-containing protein	-0.896	-1.135	-0.81	-0.792	-0.848	-1.12	-0.969	-1.066	-0.966	-0.995	-1.065	-1.117	-1.051	-0.969	down	down	down	down	down	down	down	down	down	down	down	down	down	down
G5EEK8	sca-1	Calcium-transporting ATPase	-1.08	-1.086	-1.395	-1.451	-1.298	-1.178	-0.471	-0.543	-0.854	-0.525	-0.915	-0.675	-1.097	-1.141	down	down	down	down	down	down	down	down	down	down	down	down	down	down
Q9XWJ5	CELE_Y51H1A.3	Uncharacterized protein	-0.919	-0.956	-1.088	-0.962	-1.028	-1.162	-0.322	-0.464	-0.529	-0.604	-0.584	-0.525	-0.782	-0.863	down	down	down	down	down	down	down	down	down	down	down	down	down	down
Q23679	mdt-22	Mediator of RNA polymerase II transcription subunit 22	1.936	1.736	1.886	1.885	1.806	1.773	0.815	1.585	1.784	1.409	1.651	1.729	1.93	2.054	up	up	up	up	up	up	up	up	up	up	up	up	up	up
P52010	cyn-2	Peptidyl-prolyl cis-trans isomerase 2	-2.4	-2.799	-3.238	-3.399	-2.673	-2.563	-1.696	-1.934	-2.495	-3.395	-1.511	-3.142	-2.493	-3.764	down	down	down	down	down	down	down	down	down	down	down	down	down	down
Q95XY8	CELE_Y51H7C.9	ACT domain-containing protein	-1.809	-1.406	-1.133	-0.982	-0.533	-0.64	-1.539	-2.3	-1.165	-1.327	-2.005	-1.288	-2.552	-1.709	down	down	down				down	down			down	down	down	down
Q9N3R5	inx-22	Innexin	1.425	1.068	1.709	1.81	1.909	1.249	0.885	1.561	2.021	1.509	2.179	1.676	1.506	2.013	up	up	up	up	up	up	up	up	up	up	up	up	up	up
O16486	natc-2	N-acetyltransferase domain-containing protein	-1.163	-1.178	-0.671	-0.541	-0.552	-0.763	-0.537	-0.977	-0.723	-0.452	-1.294	-0.831	-1.285	-1.128	down	down	down	down	down	down	down	down	down		down	down	down	down
Q9XWH0	bub-3	Mitotic checkpoint protein bub-3	0.487	0.406	0.553	0.646	0.558	0.696	0.409	0.216	0.066	0.335	0.148	0.152	0.503	0.464	up	up	up	up	up	up	up						up	up
Q95Q25	rad-51	DNA repair protein RAD51 homolog	-0.279	-0.087	0.196	0.291	0.055	-0.02	0.706	0.582	0.241	0.309	0.111	-0.018	0.178	-0.08							up	up
H2KZB2	lem-4	Ankyrin repeat and LEM domain-containing protein 2 homolog	0.701	0.29	0.839	0.787	0.828	0.75	-0.663	-0.649	0.084	0.266	0.202	0.065	0.17	0.474	up		up	up	up	up	down	down
Q9XVS9	dhs-22	DeHydrogenases, Short chain	-0.283	-0.057	-0.388	-0.332	-0.26	-0.227	-0.359	-0.214	0.022	-0.124	0.001	-0.315	-0.002	-0.368			down	down	down		down					down		down
P46822	klc-2	Kinesin light chain	-0.031	-0.057	-0.086	-0.16	0.025	0.016	-0.31	-0.287	-0.329	-0.193	-0.144	-0.222	-0.079	-0.318							down	down	down					down
Q23315	ears-1	Glutamate--tRNA ligase	-0.516	-0.613	-0.508	-0.485	-0.577	-0.58	-0.236	-0.218	-0.33	-0.344	-0.486	-0.523	-0.606	-0.415	down	down	down	down	down	down	down	down	down	down	down	down	down	down
P34346	let-754	Adenylate kinase	-0.921	-0.812	-1.213	-1.105	-1.265	-1.223	-0.357	-0.507	-0.578	-0.649	-0.532	-0.688	-0.83	-0.812	down	down	down	down	down	down	down	down	down	down	down	down	down	down
Q19007	nap-1	Nucleosome Assembly Protein	-0.663	-0.792	-0.917	-0.922	-0.865	-0.991	-0.354	-0.563	-0.507	-0.628	-0.713	-0.624	-0.978	-0.69	down	down	down	down	down	down	down	down	down	down	down	down	down	down
Q94215	lec-11	Galectin	0.691	1.595	1.032	1.005	1.173	1.22	-0.888	-0.321	0.078	0.451	0.361	0.695	0.485	0.796		up	up	up	up	up	down							up
D5MCR3	sup-26	SUPpressor	0.398	0.414	1.134	1.025	1.053	1.744	-0.96	-1.004	-1.278	-1.088	-1.267	-0.953	0.429	-0.397			up	up	up	up	down	down	down	down	down	down
O17069	CELE_F23F1.6	AA_permease_C domain-containing protein	0.447	0.754	0.41	0.669	0.409	0.67	-0.695	-0.171	0.165	0.287	0.336	0.256	0.533	0.548		up		up		up	down
O17287	tomm-22	Mitochondrial import receptor subunit TOM22 homolog	-0.904	-1.063	-0.737	-0.815	-0.747	-0.898	-0.364	-0.605	-0.772	-0.829	-0.886	-0.776	-1.061	-0.864	down	down	down	down	down	down	down	down	down	down	down	down	down	down
G4SI07	gei-15	GEX Interacting protein	-0.309	-0.094	-0.523	-0.528	-0.582	-0.574	-0.434	-0.507	-0.482	-0.359	-0.291	-0.225	-0.274	-0.34			down	down	down	down	down	down	down
Q7JKP6	hsr-9	Protein hsr-9	0.642	0.522	1.189	1.149	1.129	1.444	0.418	0.321	0.221	0.24	0.268	0.172	0.769	0.64	up	up	up	up	up	up	up						up	up
O45947	gly-10	Putative polypeptide N-acetylgalactosaminyltransferase 10	-1.101	-1.208	-0.798	-0.774	-0.861	-0.863	-0.46	-0.633	-0.615	-0.517	-0.711	-0.889	-0.813	-0.898	down	down	down	down	down	down	down	down	down	down	down	down	down	down
O62360	dnj-17	J domain-containing protein	-0.36	-0.409	-0.189	-0.057	-0.157	-0.315	-0.399	-0.424	-0.048	0.002	-0.148	-0.278	-0.244	-0.196	down	down				down	down	down
Q23463	eftu-2	Tr-type G domain-containing protein	-0.516	-0.758	-0.415	-0.236	-0.319	-0.173	-0.388	-0.798	-1.003	-1.048	-0.927	-1.007	-0.689	-0.633	down	down	down		down		down	down	down	down	down	down	down	down
P0AB80	ilvE	Branched-chain-amino-acid aminotransferase	0.5	3.169	1.043	1.961	1.588	1.984	-3.536	-1.388	1.089	0.501	1.59	1.414	2.165	1.753		up					down
P11141	hsp-6	Heat shock protein hsp-6	-0.497	-0.546	-0.529	-0.493	-0.511	-0.656	-0.374	-0.489	-0.419	-0.439	-0.382	-0.368	-0.689	-0.428	down	down	down	down	down	down	down	down	down	down	down	down	down	down
G5EF02	spn-4	PIP-1	1.312	1.301	2.179	2.51	2.275	1.521	1.487	0.287	0.393	0.563	1.195	1.072	1.57	1.847			up	up	up	up	up				up		up	up
Q9XUE6	F52B11.2	Probable phosphomannomutase	-1.102	-1.163	-1.064	-1.148	-1.112	-1.127	-0.292	-0.462	-0.729	-0.807	-0.961	-1.071	-1.153	-1.095	down	down	down	down	down	down	down	down	down	down	down	down	down	down
O01815	dhod-1	Dihydroorotate dehydrogenase (quinone), mitochondrial	-0.719	-0.614	-0.788	-0.809	-0.835	-0.894	-0.274	-0.048	-0.115	-0.001	-0.253	-0.246	-0.544	-0.615	down	down	down	down	down	down	down				down	down	down	down
Q9N4V3	CELE_Y47D9A.1	NTP_transferase domain-containing protein	-1.337	-1.594	-1.036	-1.189	-1	-0.936	-0.662	-0.866	-0.959	-1.015	-1.767	-1.292	-1.633	-1.554	down	down	down	down	down	down	down	down	down	down	down	down	down	down
G5EGE9	dpy-26	Condensin complex subunit dpy-26	1.323	1.334	1.909	2.085	2.015	2.178	0.515	0.507	0.717	0.883	0.787	0.684	1.488	1.414	up	up	up	up	up	up	up	up	up	up	up	up	up	up
O44481	CELE_F13B6.1	Uncharacterized protein	-0.881	-0.459	-0.325	-0.565	-1.012	0.117	-1.481	-2.266	-2.171	-2.542	-1.296	-1.558	-1.217	-1.546					down		down	down	down	down	down	down		down
O76636	CELE_H41C03.1	CRAL-TRIO domain-containing protein	-2.013	-2.615	-1.941	-2.064	-1.858	-2.33	-1.55	-1.507	-2.015	-2.552	-2.653	-1.717	-2.735	-2.394	down	down	down	down	down	down	down	down	down	down	down	down	down	down
G5EFL7	CELE_E02H4.6	Protein kinase domain-containing protein	1.779	1.71	2.068	2.325	2.326	2.087	1.24	1.166	1.507	1.548	1.623	1.59	1.752	1.836	up	up	up	up	up	up	up	up	up	up	up	up	up	up
Q9N3U9	skr-14	Skp1-related protein	0.206	0.164	-0.357	-0.768	-0.932	-0.512	1.772	0.91	-0.374	-0.882	0.356	0.103	-0.07	0.275							up
Q9N2W7	Y94H6A.8	Probable NADH dehydrogenase [ubiquinone] 1 alpha subcomplex subunit 12	-1.268	-1.268	-1.581	-1.548	-1.596	-1.55	-0.442	-0.769	-0.953	-1.148	-0.885	-1.101	-1.223	-1.335	down	down	down	down	down	down	down	down	down	down	down	down	down	down
H2KYB8	grld-1	Glutamate Receptor Level Decreased	-2.101	-0.978	-0.571	-0.329	-0.473	0.326	-1.492	-2.428	-1.652	-1.954	-1.831	-1.41	-3.152	-1.788	down						down	down	down	down	down	down	down	down
Q9XVN1	CELE_F53B6.4	Major sperm protein	-2.97	-2.426	-2.236	-1.737	-1.633	-1.242	-2.158	-2.238	-3.008	-1.654	-5.107	-2.826	-2.635	-3.592	down	down	down	down	down		down	down	down		down	down	down	down
G5EDH7	anat-1	AANAT (Arylalkylamine N-AcetylTransferase) homolog	0.856	0.855	1.456	1.578	1.562	1.438	0.677	0.936	1.02	1.002	0.957	1.152	0.944	1.214	up	up	up	up	up	up	up	up	up	up	up	up	up	up
P0DM41;P0DM42	act-1	Actin-1;Actin-3	-0.696	-0.613	-0.548	-0.506	-0.579	-0.653	-0.468	-0.896	-0.928	-0.819	-0.997	-0.631	-0.838	-0.653	down	down	down	down	down	down	down	down	down	down	down	down	down	down
Q19722	nars-1	Asparagine--tRNA ligase, cytoplasmic	-0.606	-0.615	-0.189	-0.166	-0.127	-0.154	-0.306	-0.434	-0.463	-0.406	-0.618	-0.45	-0.542	-0.535	down	down					down	down	down	down	down	down	down	down
Q9N425	csn-3	COP9 signalosome complex subunit 3	0.431	0.433	-0.221	-0.267	-0.082	0.067	0.452	0.333	0.251	0.6	0.491	0.089	0.442	0.487	up	up					up			up	up		up	up
P91910	mec-12	Tubulin alpha-3 chain	-0.086	0.196	0.5	0.678	0.559	0.839	-0.393	-0.456	-0.416	-0.352	-0.221	-0.105	-0.145	-0.094			up	up	up	up	down	down	down
Q20641	nmy-1	Non-muscle MYosin	0.076	0.158	0.326	0.346	0.338	0.303	-0.301	-0.439	-0.427	-0.399	-0.205	-0.142	-0.057	-0.106			up	up	up	up	down	down	down	down
Q7YWX7	mig-14	Protein wntless homolog	1.403	1.64	1.967	1.857	2.015	1.985	0.74	1.084	1.38	1.752	1.555	1.059	1.738	1.652	up	up	up	up	up	up	up	up	up	up	up	up	up	up
P45748	tsaC	Threonylcarbamoyl-AMP synthase	-0.517	1.904	0.523	-0.095	0.626	0.008	-1.491	-0.426	-0.543	-0.691	0.58	0.656	0.093	0.245		up					down
P08179	purN	Phosphoribosylglycinamide formyltransferase	-0.814	-0.548	-0.16	-0.143	-0.441	-0.181	-1.361	-1.464	-1.096	-0.175	-1.3	-0.901	-0.176	-0.289							down	down	down		down
P23827	eco	Ecotin	-2.273	1.341	-1.441	-0.49	-0.925	-0.999	-2.336	-2.24	-2.098	-1.667	-1.112	-2.153	-0.746	-1.306	down						down	down	down			down
Q18253	dpf-2	Dipeptidyl peptidase family member 2	1.515	1.789	1.827	2.148	1.738	2.025	0.622	1.123	1.162	1.684	1.335	1.596	1.504	1.33	up	up	up	up	up	up	up	up	up	up	up	up	up	up
Q23196	CELE_W06B4.1	Uncharacterized protein	0.266	0.383	0.899	1.127	1.034	1.172	0.642	0.097	0.229	-0.053	0.078	0.199	0.591	0.451			up	up	up	up	up						up
P30625	kin-2	cAMP-dependent protein kinase regulatory subunit	-0.768	-0.642	-0.463	-0.57	-0.485	-0.486	-0.398	-0.597	-0.559	-0.585	-0.703	-0.463	-0.736	-0.778	down	down	down	down	down	down	down	down	down	down	down	down	down	down
O62514	CELE_ZK550.5	Uncharacterized protein	-3.54	-2.348	-2.893	-3.718	-4.347	-4.031	-2.769	-3.328	-1.838	-3.955	-2.146	-2.929	-2.784	-4.636	down		down	down	down	down	down	down		down	down	down	down	down
P91189	dnj-7	DNaJ domain (Prokaryotic heat shock protein)	-1.354	-1.083	-1.272	-1.445	-1.214	-1.309	-0.374	-0.378	-0.617	-0.587	-0.684	-0.769	-1.09	-1.349	down	down	down	down	down	down	down	down	down	down	down	down	down	down
O16309	fkb-3	Peptidylprolyl isomerase	-3.307	-3.576	-3.89	-3.862	-3.92	-4.136	-0.91	-1.257	-1.667	-1.634	-2.089	-2.803	-3.017	-3.681	down	down	down	down	down	down	down	down	down	down	down	down	down	down
G5EGL2	CELE_T28D6.6	OBG-type G domain-containing protein	-0.783	-0.918	-1.035	-1.116	-1.091	-1.033	-0.31	-0.464	-0.663	-0.562	-0.947	-0.862	-1.054	-0.895	down	down	down	down	down	down	down	down	down	down	down	down	down	down
Q9U1Q8	hrg-10	Heme Responsive protein	-1.596	-1.781	-0.812	-0.867	-0.975	-0.854	0.719	0.908	0.478	0.111	0.021	-0.385	-0.702	-1.223	down	down	down	down	down	down	up	up					down	down
P34497	gln-2	Probable glutamine synthetase	-4.104	-3.11	-3.667	-2.722	-3.525	-3.126	-1.587	-4.672	-4.086	-3.302	-3.895	-4.245	-4.409	-3.516	down	down	down	down	down	down	down	down	down	down	down	down	down	down
P76243	yeaO	Uncharacterized protein YeaO	0.457	0.775	0.635	-0.041	0.726	0.076	-1.353	-0.661	0.201	1.068	-0.391	-0.032	-0.364	-0.32							down
P34649	riok-3	Serine/threonine-protein kinase RIO3	-0.397	-0.458	-0.388	-0.326	-0.14	-0.055	-0.519	-0.68	-0.365	-0.669	-0.504	-0.693	-0.205	-0.569			down				down	down		down	down	down		down
O18180	mrpl-12	Mitochondrial Ribosomal Protein, Large	-0.972	-1.207	-0.504	-0.502	-0.571	-0.612	-0.559	-0.539	-0.772	-0.391	-1.019	-0.928	-0.788	-0.681	down	down	down	down	down	down	down	down	down		down	down	down	down
P91493	snt-4	SyNapTotagmin	-1.406	-1.071	-1.087	-1.315	-1.039	-1.075	-1.454	-1.859	-2.602	-1.116	-1.581	-1.971	-1.662	-2.224	down		down	down	down	down	down	down	down		down	down	down	down
O45470	oac-20	NRF domain-containing protein	-2.015	-0.921	-1.646	-1.37	-1.576	-1.712	-1.124	-0.142	-1.124	-1.035	-2.136	-1.605	-0.633	-1.846	down		down	down	down	down	down		down	down	down	down		down
Q22660	CELE_T22B3.3	Major sperm protein	-3.717	-4.188	-3.456	-2.527	-2.904	-2.367	-1.662	-4.55	-3.039	-3.978	-4.67	-3.635	-3.953	-4.054	down	down	down	down	down	down	down	down	down	down	down	down	down	down
Q8IU00	puf-11	PUM-HD domain-containing protein	-0.374	-0.645	-0.547	-0.36	-0.597	-0.701	0.703	1.308	1.35	1.33	0.992	0.531	-0.625	-0.014		down	down		down	down	up	up	up	up	up		down
O16327	irg-1	NADAR domain-containing protein	-1.63	-1.25	-1.822	-1.601	-2.119	-2.074	-1.295	-1.099	-0.342	-0.723	-0.601	-1.304	-0.904	-1.557	down	down	down	down	down	down	down	down				down		down
Q9N3D9	nduf-5	NADH dehydrogenase [ubiquinone] iron-sulfur protein 5	-0.756	-0.809	-1.256	-1.204	-1.204	-1.374	-0.355	-0.376	-0.558	-0.563	-0.603	-0.542	-0.764	-0.863	down	down	down	down	down	down	down	down	down	down	down	down	down	down
Q8MPU7	CELE_F48C1.9	Uncharacterized protein	7.483	6.867	5.872	4.94	5.505	5.376	2.856	3.077	4.183	4.064	6.634	5.571	6.954	6.8	up	up	up	up	up	up	up	up	up	up	up	up	up	up
O44549	acdh-3	Acyl CoA DeHydrogenase	-0.765	-0.79	-0.695	-0.649	-0.664	-0.534	-0.334	-0.594	-0.75	-0.547	-0.759	-0.81	-0.863	-0.676	down	down	down	down	down	down	down	down	down	down	down	down	down	down
G5ECI8	fars-2	Phenylalanine--tRNA ligase	-0.598	-0.499	-0.916	-0.968	-1.025	-1.097	-0.373	-0.445	-0.55	-0.345	-0.476	-0.457	-0.67	-0.413	down	down	down	down	down	down	down	down	down	down	down	down	down	down
Q9TZG9	fbxb-17	FBA_2 domain-containing protein	0.796	2.188	1.759	2.302	2.347	2.399	1.828	1.281	0.306	0.777	0.502	-0.128	-0.019	1.87		up	up	up	up	up	up							up
Q94402	nol-16	Nucleolar protein 16	-1.285	-1.309	-1.094	-1.317	-1.26	-1.532	-0.659	-1.022	-1.111	-1.477	-1.282	-1.331	-1.225	-1.408	down	down	down	down	down	down	down	down	down	down	down	down	down	down
Q19467	git-1	GIT1 (Mammalian G protein-coupled receptor kinase InTeractor 1) homolog	-0.527	-0.373	-0.053	-0.236	0.066	0.1	-0.507	-0.597	-0.551	-0.703	-0.878	-0.448	-0.596	-0.46	down						down	down	down	down	down	down	down
Q9U302	pab-1	Polyadenylate-binding protein	-1.145	-1.284	-1.213	-1.233	-1.261	-1.29	-0.387	-0.558	-0.793	-0.921	-0.927	-0.999	-1.421	-1.133	down	down	down	down	down	down	down	down	down	down	down	down	down	down
Q8I4C9	unc-61	Septin-type G domain-containing protein	1.453	1.236	1.499	1.561	1.438	1.653	0.456	0.412	0.49	0.826	0.772	0.593	1.369	1.291	up	up	up	up	up	up	up	up	up	up	up	up	up	up
Q17754	tin-9.1	Mitochondrial import inner membrane translocase subunit Tim9	-6.106	-6.201	-5.942	-5.578	-5.833	-6.01	-2.983	-6.817	-6.119	-6.125	-7.276	-5.819	-5.357	-6.819	down	down	down	down	down	down	down	down	down	down	down	down	down	down
Q21810	CELE_R07E3.1	Uncharacterized protein	-2.037	-2.305	-2.434	-2.341	-1.781	-2.062	-1.134	-1.154	-1.17	-0.786	-1.54	-1.069	-1.653	-1.745	down	down	down	down	down	down	down	down	down		down	down	down	down
P02566	unc-54	Myosin-4	-0.948	-1.059	-1.026	-0.975	-1.161	-1.205	-0.482	-0.715	-0.801	-0.798	-0.824	-0.615	-1.067	-0.973	down	down	down	down	down	down	down	down	down	down	down	down	down	down
H2L2E8	tba-1	Tubulin alpha chain	-0.558	-0.65	-0.214	-0.202	-0.162	0.148	-0.418	-0.654	-0.68	-0.587	-0.774	-0.605	-0.67	-0.67	down	down					down	down	down	down	down	down	down	down
Q9N584	let-630	Uncharacterized protein	-0.604	-0.732	-0.734	-0.596	-0.646	-0.838	-0.311	-0.421	-0.474	-0.39	-0.444	-0.666	-0.786	-0.58	down	down	down	down	down	down	down	down	down	down	down	down	down	down
P30429	ced-4	Cell death protein 4	1.049	0.753	0.852	0.348	0.853	0.935	0.78	0.88	0.802	1.242	0.799	0.543	0.767	0.846	up	up	up		up	up	up	up	up	up	up		up	up
Q17345	ccf-1	CCR4-NOT transcription complex subunit 7	0.453	0.278	1.274	1.122	1.256	0.9	0.553	0.572	0.621	0.897	0.643	0.42	0.542	0.837			up	up	up	up	up	up	up	up	up		up	up
Q21115	sec-12	WD_REPEATS_REGION domain-containing protein	-0.621	-0.634	-0.817	-0.969	-0.787	-0.799	-0.416	-0.633	-0.729	-0.555	-0.729	-0.701	-0.642	-0.639	down	down	down	down	down	down	down	down	down	down	down	down	down	down
O76840	mig-6	Papilin	0.357	0.372	0.165	0.348	0.321	0.544	-0.376	-0.366	-0.287	-0.27	-0.017	0.102	-0.03	0.054	up	up		up	up	up	down	down
O16991	ttb-1	Transcription initiation factor IIB	-0.296	-0.403	0.205	0.249	0.222	0.746	-0.666	-0.984	-1.152	-1.086	-1.11	-0.721	-0.22	-0.571						up	down	down	down	down	down	down
G5EDA8	CELE_Y45F10B.13	Uncharacterized protein	-1.101	-1.115	-1.626	-1.867	-1.747	-2.063	-0.507	-0.524	-0.468	-0.659	-0.451	-0.576	-0.893	-1.167	down	down	down	down	down	down	down	down	down	down	down	down	down	down
P91136	C37H5.5	Nucleolar complex protein 3 homolog	-1.043	-1.322	-1.205	-1.238	-1.164	-1.382	-0.529	-0.857	-1.039	-1.249	-1.342	-1.124	-1.363	-1.26	down	down	down	down	down	down	down	down	down	down	down	down	down	down
Q95XT1	supr-1	SUPpressor of Rpm-1	-0.217	-0.196	-0.091	-0.438	0.18	-0.485	-1.193	-0.798	-0.325	-0.092	-0.44	-0.399	0.366	-0.726							down
Q09958	C18A3.3	Probable rRNA-processing protein EBP2 homolog	-1.651	-1.857	-1.401	-1.251	-1.339	-1.255	-0.737	-1.266	-1.386	-1.521	-1.786	-1.594	-1.834	-1.64	down	down	down	down	down	down	down	down	down	down	down	down	down	down
O61793	CELE_R12E2.13	Uncharacterized protein	-0.532	-0.621	-0.428	-0.535	-0.452	-0.595	-0.4	-0.217	-0.335	-0.186	-0.456	-0.601	-0.463	-0.501	down	down	down	down	down	down	down		down		down	down	down	down
P0AAX3	ybiJ	Uncharacterized protein YbiJ	-2.207	1.916	-0.785	-0.424	-0.76	-0.255	-1.795	-1.601	-0.69	-1.031	0.301	0.185	0.366	-1.563	down	up					down	down
Q11077	B0403.3	Uncharacterized protein B0403.3	2.907	3.357	3.156	3.401	3.568	3.764	-1.167	-0.229	0.96	1.259	2.267	2.22	2.351	2.712	up	up	up	up	up	up	down		up	up	up	up	up	up
O44408	kgb-1	GLH-binding kinase 1	-0.545	-0.319	-0.303	-0.208	-0.232	-0.062	-0.418	-0.705	-0.941	-0.729	-0.519	-0.543	-0.671	-0.538	down		down				down	down	down	down	down	down	down	down
Q9XXN4	ngp-1	Nucleolar GTP-binding protein 2	-1.856	-2.103	-2.223	-2.257	-2.183	-2.23	-0.565	-1.232	-1.665	-1.934	-1.87	-1.915	-1.96	-2.176	down	down	down	down	down	down	down	down	down	down	down	down	down	down
P36573	lec-1	32 kDa beta-galactoside-binding lectin	-0.105	0.211	0.087	0.006	0.053	0.081	-0.515	-0.819	-0.668	-0.711	-0.33	-0.154	0.016	0.104							down	down	down	down
Q19063	CELE_E04F6.8	Uncharacterized protein	5.309	5.394	6.157	6.16	6.259	6.088	0.829	1.907	2.905	2.966	3.85	3.98	4.585	5.063	up	up	up	up	up	up	up	up	up	up	up	up	up	up
K8ESM7	cup-14	RUN domain-containing protein	1.552	1.636	1.881	1.948	2.025	1.828	0.686	1.007	1.16	1.267	1.295	1.555	1.53	1.342	up	up	up	up	up	up	up	up	up	up	up	up	up	up
Q95X83	rpoa-49	RNA POlymerase I (A) subunit	-1.15	-1.378	-0.873	-1.104	-0.926	-1.196	-0.524	-0.941	-0.969	-0.914	-1.167	-1.317	-1.375	-1.206	down	down	down	down	down	down	down	down	down	down	down	down	down	down
P34387	crn-7	Cell-death-related nuclease 7	-0.109	0.118	0.257	0.418	0.379	0.427	-0.616	-0.676	-0.447	0.033	-0.48	-0.195	-0.364	-0.097				up		up	down	down			down
Q21430	pix-1	PIX (PAK (p21-activated kinase) Interacting eXchange factor) homolog	-0.392	-0.14	-0.113	-0.129	-0.056	0.031	-0.532	-0.622	-0.691	-0.446	-0.742	-0.381	-0.471	-0.397							down	down	down		down
P0AGK4	yhbY	RNA-binding protein YhbY	-2.791	0.055	-1.494	-1.315	-1.951	-1.506	-3.085	-2.546	-1.801	-2.453	-0.939	-0.733	-0.483	-2.371							down
P34382	far-1	Fatty-acid and retinol-binding protein 1	0.541	1.019	0.606	0.324	0.716	0.61	-0.936	-1.465	-1.366	-1.991	-0.077	0.078	0.294	0.408		up			up		down	down	down	down
P46577	gop-2	GPN-loop GTPase 1	-0.435	-0.595	-0.969	-1.06	-0.954	-0.996	-0.473	-0.627	-0.747	-0.78	-0.575	-0.819	-0.843	-0.538	down	down	down	down	down	down	down	down	down	down	down	down	down	down
Q20829	aman-1	Alpha-mannosidase	1.316	1.072	1.078	1.177	1.085	1.002	-0.384	-0.353	0.25	0.375	0.639	0.769	0.954	1.044	up	up	up	up	up	up	down	down		up	up	up	up	up
Q93695	gst-12	Glutathione S-Transferase	-2.113	-3.351	-2.065	-2.239	-2.306	-1.738	-1.813	-1.748	-2.878	-1.842	-2.408	-2.794	-2.035	-2.514	down	down	down	down	down	down	down	down	down	down	down	down	down	down
Q20377	CELE_F43H9.3	NTP_transf_2 domain-containing protein	1.012	0.807	0.252	-0.015	0.389	0.235	1.054	0.735	1.263	1.219	1.032	0.868	0.988	0.849	up						up		up	up	up		up
Q23378	ttr-48	TransThyretin-Related family domain	0.995	1.342	1.553	1.614	1.484	1.707	-0.512	-0.301	0.366	0.749	0.914	0.937	0.853	1.205	up	up	up	up	up	up	down			up	up	up	up	up
Q9N4E9	ppfr-4	Serine/threonine-protein phosphatase 4 regulatory subunit ppfr-4	0.479	0.539	0.279	0.368	0.361	0.167	0.466	0.549	0.697	0.695	0.923	0.633	0.381	0.62	up	up		up	up		up	up	up	up	up	up		up
P34618	cec-1	Chromo domain-containing protein cec-1	0.253	-0.069	0.487	0.591	0.768	1.022	-0.72	-0.733	-0.577	-0.794	-0.376	-0.55	0.53	-0.31				up	up	up	down	down		down
Q21614	cah-4	Alpha-carbonic anhydrase domain-containing protein	-0.415	-0.581	-0.791	-0.215	-0.625	-0.611	1.034	-0.338	-0.954	-0.445	-1	-0.443	-0.889	-0.53			down				up		down		down
Q9BL56	CELE_Y65B4A.8	CTP_transf_like domain-containing protein	-0.997	-0.901	-1.138	-1.054	-1.047	-0.846	-0.543	-0.937	-0.921	-1.123	-1.009	-0.838	-1.254	-0.978	down	down	down	down	down	down	down	down	down	down	down	down	down	down
P34339	egl-45	Eukaryotic translation initiation factor 3 subunit A	-0.849	-1.019	-0.763	-0.778	-0.794	-0.885	-0.264	-0.43	-0.574	-0.553	-0.784	-0.797	-0.954	-0.825	down	down	down	down	down	down	down	down	down	down	down	down	down	down
Q22467	ctg-2	CRAL/TRIO and GOLD domain containing	-1.159	-1.083	-0.563	-0.713	-0.435	-0.556	-0.672	-0.447	-0.572	-0.473	-0.889	-0.499	-0.824	-0.943	down	down	down	down		down	down		down		down		down	down
Q23647	hpo-40	Hypersensitive to pore-forming toxin protein 40	0.587	0.71	0.481	0.354	0.545	0.199	0.423	0.493	0.528	0.459	0.875	0.696	0.596	0.829	up	up	up	up	up		up	up	up	up	up	up	up	up
P42573	ced-3	Cell death protein 3	0.895	0.657	0.4	0.259	-0.009	0.348	1.118	1.321	1.288	1.864	1.413	0.453	1.23	1.175							up	up	up	up	up		up	up
Q94055	agxt-1	Alanine--glyoxylate aminotransferase	-1.534	-1.68	-1.762	-2.528	-1.872	-1.739	-1.408	-2.222	-2.509	-3.106	-1.85	-2.449	-1.565	-2.563	down	down	down	down	down	down	down	down	down	down	down	down	down	down
P0A9G6	aceA	Isocitrate lyase	-0.09	2.563	0.49	0.887	-0.017	0.591	-2.733	-0.047	0.203	-1.884	0.94	0.969	1.412	-0.602		up					down
Q9U3A1	cisd-3.1	CDGSH Iron Sulfur Domain protein homolog	-1.191	-1.436	-1.133	-0.88	-1.161	-1.172	-0.619	-0.885	-0.961	-0.525	-1.514	-1.134	-1.112	-0.915	down	down	down	down	down	down	down	down	down		down	down	down	down
Q8STE5	ced-12	Cell death abnormality protein 12	0.095	0.399	0.315	0.338	0.566	0.634	0.515	0.862	0.436	0.694	0.477	0.233	0.243	0.061					up	up	up	up	up	up	up
O62123	fbxa-141	FTH domain-containing protein	0.223	1.471	1.037	0.775	0.683	0.71	1.545	1.872	1.123	1.016	1.611	1.654	0.152	0.934		up					up	up			up	up
Q45EK2	ceh-60	Homeobox protein ceh-60	-1.976	-1.772	-1.068	-1.341	-1.576	-1.783	-1.544	-1.898	-1.254	-0.771	-2.296	-1.514	-1.446	-1.833	down	down		down	down	down	down	down			down	down	down	down
Q9U370	pis-1	PIS (Pax-2, IA-1/6, Smad-2 interacting protein) homolog	-0.136	0.066	0.303	0.155	0.134	0.317	-0.528	-0.205	-0.182	0.049	-0.265	-0.07	0.276	-0.093							down
Q19684	CELE_F21D5.6	RNase_H2-Ydr279 domain-containing protein	0.662	0.662	1.263	1.469	1.148	1.52	0.67	0.531	0.508	0.697	0.555	0.379	1.027	0.93	up	up	up	up	up	up	up			up	up		up	up
Q965K6	CELE_T24E12.5	Uncharacterized protein	-0.347	0.922	0.409	0.352	0.035	-0.241	-1.77	-1.117	-0.194	-1.457	0.32	0.455	0.071	0.664							down
Q9XWK6	sup-35	SUPpressor	-0.951	-1.245	-1.497	-1.465	-1.164	-1.183	0.76	0.266	0.108	0.064	-0.147	-0.124	-0.778	-0.824	down	down	down	down	down	down	up						down	down
Q20507	acbp-3	Acyl-CoA-binding protein homolog 3	-4.001	-4.288	-4.15	-4.146	-4.513	-3.315	-1.541	-2.683	-3.232	-3.441	-3.187	-3.263	-4.026	-4.249	down	down	down	down	down	down	down	down	down	down	down	down	down	down
Q9TYP9	mca-2	Calcium-transporting ATPase	0.086	0.181	0.044	0.119	0.247	0.271	-0.319	-0.452	-0.567	-0.451	-0.524	-0.182	-0.312	-0.188					up	up	down	down	down	down	down		down
P30642	eif-3.D	Eukaryotic translation initiation factor 3 subunit D	-0.903	-1.004	-0.892	-0.873	-0.903	-0.873	-0.391	-0.45	-0.649	-0.468	-0.954	-0.744	-1.034	-0.863	down	down	down	down	down	down	down	down	down	down	down	down	down	down
G5EF08	ncx-1	Na/Ca eXchangers	-1.619	-1.305	-1.161	-1.25	-1.196	-1.348	-0.543	-0.85	-1.073	-1.328	-1.437	-1.047	-1.386	-1.557	down	down	down	down	down	down	down	down	down	down	down	down	down	down
A0A131MCL4	die-1	C2H2-type domain-containing protein	1.183	1.864	-0.479	-0.118	-0.767	0.583	2.271	1.862	1.67	1.372	2.142	0.351	2.293	1.87							up				up		up
Q19329	tag-151	Pre-rRNA-processing protein TSR1 homolog	-1.268	-1.31	-1.517	-1.732	-1.548	-1.804	-0.382	-0.775	-0.922	-1.147	-1.139	-1.085	-1.261	-1.26	down	down	down	down	down	down	down	down	down	down	down	down	down	down
G5ECH0	hda-3	Histone deacetylase	0.97	0.995	1.263	1.307	1.35	1.58	0.491	0.279	0.341	0.346	0.514	0.157	1.276	0.953	up	up	up	up	up	up	up				up		up	up
Q20779	cox-6A	Cytochrome c oxidase subunit 6A, mitochondrial	-0.416	-0.131	-0.519	-0.509	-0.523	-0.737	-0.375	-0.278	-0.178	-0.097	-0.193	0.152	-0.35	-0.245	down		down	down	down	down	down						down
G5EF34	crm-1	CRiM (Cysteine Rich motor neuron protein) homolog	0.177	0.187	0.36	0.111	0.436	0.631	-1.393	-0.238	-1.119	-0.442	0.01	-0.446	-0.257	0.251							down
Q27474	lig-1	DNA ligase 1	1.294	1.322	1.415	1.476	1.489	1.695	0.462	0.528	0.548	0.744	0.923	0.556	1.227	1.322	up	up	up	up	up	up	up	up	up	up	up	up	up	up
A0A0K3AX73	pqn-80	HUN domain-containing protein	0.92	0.82	1.185	1.246	1.121	1.027	0.443	0.57	0.697	0.826	0.705	0.712	0.987	1	up	up	up	up	up	up	up	up	up	up	up	up	up	up
Q7YX96	C08F8.9	Uncharacterized protein	-1.569	-1.419	-0.595	-0.688	-0.783	-0.841	-0.983	-1.027	-1.252	-1.222	-1.254	-0.713	-1.55	-1.641	down	down		down	down	down	down	down	down	down	down		down	down
O17772	pes-7	Patterned Expression Site	-0.036	0.222	0.046	0.038	0.025	0.012	-0.351	-0.35	-0.206	-0.059	-0.04	0.088	0.066	-0.082							down	down
Q20059	wdr-48	WD repeat-containing protein 48 homolog	0.9	1.026	1.362	1.434	1.385	1.591	0.372	0.177	0.101	-0.006	0.538	0.397	1.09	0.894	up	up	up	up	up	up	up				up	up	up	up
O18202	clec-146	C-type lectin domain-containing protein	4.791	4.336	4.178	4.406	4.221	4.322	1.049	1.814	2.191	2.35	3.333	2.984	3.549	4.183	up	up	up	up	up	up	up	up	up	up	up	up	up	up
P27639	inf-1	Eukaryotic initiation factor 4A	-1.288	-1.431	-1.132	-1.257	-1.181	-1.038	-0.472	-0.876	-1.007	-0.851	-1.316	-1.122	-1.55	-1.155	down	down	down	down	down	down	down	down	down	down	down	down	down	down
G5EG50	CELE_T04A11.1	Uncharacterized protein	-0.71	-0.32	-1.1	-2.063	-1.601	-1.856	-0.745	-0.845	-0.504	-0.307	-0.281	-0.239	-0.366	-1.086	down		down	down	down	down	down	down						down
Q23526	CELE_ZK546.2	Uncharacterized protein	-0.354	-0.246	-0.113	-0.155	-0.125	-0.168	-0.356	-0.272	-0.35	-0.097	-0.417	-0.275	-0.296	-0.301	down						down		down		down
C1P633	magi-1	MAGI (Membrane Associated Guanylate kinase Inverted) homolog	0.494	0.426	0.773	0.69	0.741	0.835	-0.587	-0.331	-0.401	0.023	-0.31	0.055	0.49	0.191			up	up	up	up	down
H2KZ53	skpo-3	ShKT domain-containing protein	-1.465	-0.885	-0.79	-0.601	-0.793	-0.638	-0.611	-0.93	-1.018	-1.018	-1.051	-0.989	-0.92	-1.429	down	down	down	down	down	down	down	down	down	down	down	down	down	down
H2L0S5	CELE_Y71H2AM.15	AIP3 domain-containing protein	-1.411	-1.197	-1.956	-1.808	-1.346	-1.981	-1.21	-1.595	-1.005	-1.969	-1.851	-2.435	-1.685	-2.416	down	down	down	down	down	down	down	down	down	down	down	down	down	down
P52814	rpl-39	60S ribosomal protein L39	-1.76	-1.612	-1.803	-1.767	-1.788	-1.74	-0.963	-1.428	-1.008	-1.944	-1.348	-1.317	-1.759	-1.806	down	down	down	down	down	down	down	down	down	down	down	down	down	down
P69783	crr	PTS system glucose-specific EIIA component	-1.379	2.184	-0.526	0.245	-0.401	-0.339	-2.525	-1.086	-0.392	-0.601	0.56	0.414	0.605	-1.153							down
Q965T4	taco-1	Translational Activator of Cytochrome c Oxidase	-1.646	-1.709	-1.704	-1.521	-1.749	-1.585	-0.838	-1.374	-1.888	-2.3	-1.782	-2.012	-2.147	-2.085	down	down	down	down	down	down	down	down	down	down	down	down	down	down
Q19967	sec-61.G	Protein transport protein Sec61 subunit gamma	-2.307	-2.291	-2.353	-2.824	-2.444	-2.79	-0.836	-1.273	-1.38	-1.705	-1.654	-2.396	-2.283	-2.285	down	down	down	down	down	down	down	down	down	down	down	down	down	down
O17396	CELE_F52H2.5	Uncharacterized protein	1.28	1.613	1.648	1.754	0.848	1.119	1.116	1.049	1.027	1.587	1.145	1.366	1.153	1.424	up	up	up	up	up	up	up	up	up	up	up	up	up	up
B3WFV9	abts-1	Anion exchange protein	-0.389	-0.223	0.033	0.183	0.154	0.325	-0.386	-0.441	-0.465	-0.414	-0.599	-0.219	-0.273	-0.325	down					up	down	down	down	down	down
P34676	pcp-5	Prolyl carboxy peptidase like protein 5	0.932	0.945	0.882	1.042	0.76	0.768	-0.599	-0.436	0.172	0.15	0.501	0.426	0.954	0.897	up	up	up	up	up	up	down				up		up	up
Q21662	CELE_R03E9.2	Glyco_hydro_63 domain-containing protein	-1.383	-1.267	-1.583	-1.766	-1.591	-2.675	-1	-1.197	-1.271	-1.734	-1.123	-1.446	-1.364	-1.556	down	down	down	down	down	down	down	down	down	down	down	down	down	down
O45625	scb-1	Uncharacterized protein	-0.362	-0.856	-0.625	-0.752	-0.388	-0.234	-0.632	-0.869	-0.806	-0.669	-0.815	-0.834	-0.521	-1.205		down	down	down			down	down	down	down	down	down		down
P46561	atp-2	ATP synthase subunit beta, mitochondrial	-1.077	-1.146	-0.861	-0.815	-0.962	-0.851	-0.435	-0.672	-0.868	-0.758	-0.798	-0.822	-1.095	-1.04	down	down	down	down	down	down	down	down	down	down	down	down	down	down
Q93235	nkb-1	Sodium/potassium-transporting ATPase subunit beta-1	-0.479	-0.432	-0.5	-0.535	-0.336	-0.204	-0.436	-0.429	-0.633	-0.483	-0.555	-0.413	-0.495	-0.573	down	down	down	down	down		down	down	down	down	down	down	down	down
P34500	ttr-2	Transthyretin-like protein 2	2.786	2.966	3.477	3.774	3.982	3.531	-0.923	-0.341	0.399	0.46	1.19	1.524	2.232	2.624	up	up	up	up	up	up	down				up	up	up	up
O02332	algn-10	Dol-P-Glc:Glc(2)Man(9)GlcNAc(2)-PP-Dol alpha-1,2-glucosyltransferase	-2.509	-2.157	-1.347	-0.651	-0.476	-0.294	-1.516	-1.295	-1.936	-1.448	-2.259	-2.412	-2.578	-1.949	down	down	down				down		down	down	down	down	down	down
P91871	fasn-1	3-oxoacyl-[acyl-carrier-protein] reductase	-1.097	-1.172	-1.651	-1.911	-1.654	-1.811	-0.517	-0.562	-0.85	-0.694	-0.992	-0.826	-1.149	-1.26	down	down	down	down	down	down	down	down	down	down	down	down	down	down
Q95QB1	CELE_T13H5.8	Cleft lip and palate transmembrane protein 1-like protein	-0.527	-0.531	-0.577	-0.727	-0.56	-0.483	-0.373	-0.498	-0.56	-0.465	-0.686	-0.712	-0.443	-0.555	down	down	down	down	down	down	down	down	down	down	down	down	down	down
Q19869	rpl-26	60S ribosomal protein L26	-1.765	-1.793	-1.538	-1.367	-1.537	-1.515	-0.562	-0.921	-1.381	-0.852	-1.793	-1.717	-1.613	-1.615	down	down	down	down	down	down	down	down	down	down	down	down	down	down
P91914	rpl-27	60S ribosomal protein L27	-1.228	-1.32	-1.73	-1.518	-1.793	-1.772	-0.473	-0.685	-0.84	-0.763	-1.006	-1.266	-1.24	-1.076	down	down	down	down	down	down	down	down	down	down	down	down	down	down
Q9NA75	tric-1B.1	Trimeric intracellular cation channel type 1B.1	-0.971	-0.861	-1.796	-1.665	-2.173	-1.788	-0.654	-0.875	-0.907	-1.168	-0.829	-0.842	-1.001	-1.092	down	down	down	down	down	down	down	down	down	down	down	down	down	down
P0ADQ2	fabY	Probable acyltransferase FabY	-2.319	1.012	-1.024	-0.773	-0.248	-0.01	-3.002	-1.3	-1.256	-1.206	-0.808	-0.941	-0.284	-0.98							down
Q8MPW0	del-6	DEgenerin Like	-1.866	-1.564	-1.702	-1.546	-2.338	-1.587	-0.897	-1.168	-1.275	-1.019	-1.094	-1.197	-1.773	-1.732	down	down	down	down	down	down	down	down	down	down	down	down	down	down
Q09644	ZK1128.1	Protein arginine methyltransferase NDUFAF7 homolog, mitochondrial	-0.615	-0.867	-0.853	-1.052	-0.919	-1.012	-0.396	-0.433	-0.398	-0.522	-0.367	-0.544	-0.893	-0.773	down	down	down	down	down	down	down	down	down	down	down	down	down	down
Q09409	cid-1	4Fe-4S ferredoxin-type domain-containing protein	-0.485	-0.426	0.012	-0.018	0.107	-0.079	-0.323	-0.246	-0.232	-0.23	-0.38	-0.373	-0.406	-0.346	down	down					down				down	down	down	down
P80361	eif-2Bgamma	Probable translation initiation factor eIF-2B subunit gamma	-0.296	-0.551	-0.539	-0.66	-0.684	-0.536	-0.565	-0.477	-0.326	-0.287	-0.547	-0.516	-0.592	-0.521		down	down	down	down	down	down				down	down	down
P34466	clu-1	Clustered mitochondria protein homolog	-1.537	-1.678	-2.132	-2.104	-2.039	-2.552	-0.526	-0.748	-0.909	-1.053	-1.124	-1.294	-1.827	-1.418	down	down	down	down	down	down	down	down	down	down	down	down	down	down
Q9BKU5	CELE_Y37E3.8	60S ribosomal protein L27a	-2.635	-3.015	-3.494	-3.317	-3.509	-3.296	-0.914	-2.003	-2.535	-2.853	-2.565	-3.099	-2.941	-3.059	down	down	down	down	down	down	down	down	down	down	down	down	down	down
Q23621	gdh-1	Glutamate dehydrogenase	-1.305	-1.422	-1.447	-1.501	-1.604	-1.554	-0.367	-0.616	-0.851	-0.828	-0.934	-0.816	-1.279	-1.412	down	down	down	down	down	down	down	down	down	down	down	down	down	down
P0A9J8	pheA	Bifunctional chorismate mutase/prephenate dehydratase	-0.404	2.351	0.869	0.801	0.54	0.436	-2.051	-1.211	-0.789	-0.76	0.668	0.131	0.498	-0.532		up					down
Q21484	hat-1	Histone acetyltransferase type B catalytic subunit	0.852	0.856	1.401	1.492	1.325	1.774	0.579	0.309	0.081	0.289	0.314	0.107	1.113	0.844	up	up	up	up	up	up	up						up	up
Q9N489	ncap-1	DUF1681 domain-containing protein	-0.655	-0.7	-0.801	-1.103	-0.83	-0.892	-0.439	-0.497	-0.595	-0.481	-0.609	-0.51	-0.768	-0.632	down	down	down	down	down	down	down	down	down	down	down	down	down	down
O45499	rps-26	40S ribosomal protein S26	-1.734	-1.545	-1.348	-1.165	-1.265	-1.281	-0.695	-1.326	-1.787	-1.886	-1.896	-1.626	-1.913	-1.599	down	down	down	down	down	down	down	down	down	down	down	down	down	down
Q9U3H0	CELE_F32D8.5	Uncharacterized protein	-0.569	-0.67	-0.776	-1.025	-0.725	-1.024	-0.29	-0.419	-0.354	-0.312	-0.511	-0.631	-0.735	-0.656	down	down	down	down	down	down	down	down	down	down	down	down	down	down
G5ED01	inos-1	Inositol-3-phosphate synthase	-2.164	-1.858	-1.667	-1.746	-1.779	-1.822	-0.497	-0.957	-1.46	-1.494	-1.422	-1.735	-1.735	-1.96	down	down	down	down	down	down	down	down	down	down	down	down	down	down
Q20121	acs-4	Fatty Acid CoA Synthetase family	0.682	0.556	0.825	0.868	1.039	1.06	0.332	0.52	0.496	0.564	0.544	0.399	0.648	0.676	up	up	up	up	up	up	up	up	up	up	up	up	up	up
P51024	yaiL	Uncharacterized protein YaiL	1.351	3.989	2.229	1.812	1.925	2.204	1.903	1.752	0.682	0.892	2.161	2.212	3.159	1.902		up	up	up	up	up	up	up			up	up	up	up
Q8MQA1	egl-19	Voltage-dependent L-type calcium channel subunit alpha	-0.818	-0.947	-1.12	-1.664	-1.2	-1.03	-1.127	-1.427	-1.077	-0.917	-1.273	-0.878	-1.162	-1.148			down	down	down	down	down	down	down		down		down	down
Q9TZ88	CELE_F54D10.5	Uncharacterized protein	2.046	2.028	2.089	2.166	2.092	2.075	0.773	1.222	1.401	1.66	1.682	1.37	1.897	1.883	up	up	up	up	up	up	up	up	up	up	up	up	up	up
Q6A4V9	C05D12.3	EGF-like domain-containing protein	-2.623	-3.989	-3.032	-3.362	-3.059	-3.813	-1.263	-1.911	-3.366	-3.087	-2.327	-3.808	-3.707	-2.983	down	down	down	down	down	down	down	down	down	down	down	down	down	down
A0A0K3AU54	CELE_K11D2.1	Uncharacterized protein	-0.712	-0.362	0.353	0.187	0.423	0.438	-0.81	-0.248	0.033	0.513	-0.199	-0.15	0.001	-0.097							down
Q9U2I8	faah-6	Amidase domain-containing protein	2.162	2.236	3.025	2.904	2.942	2.945	1.043	1.641	1.535	2.357	1.609	2.201	1.955	1.965	up	up	up	up	up	up	up	up	up	up	up	up	up	up
G5EG78	pxn-2	Peroxidasin homolog pxn-2	-0.682	-0.334	0.039	0.419	0.281	0.224	-0.726	-0.699	-0.45	-0.293	-0.623	-0.706	-0.353	-0.241							down	down			down	down
O16266	CELE_F40A3.6	Uncharacterized protein	-0.642	-0.546	-0.791	-0.69	-0.813	-0.936	-0.462	-0.577	-0.53	-0.364	-0.624	-0.431	-0.571	-0.642	down	down	down	down	down	down	down	down	down		down	down	down	down
O45085	C17H12.3	Tyrosine-protein phosphatase	-2.425	-1.955	-1.361	-1.223	-1.583	-1.566	-1.626	-1.662	-2.25	-1.541	-2.02	-2.155	-1.844	-2.891	down	down	down	down	down	down	down	down	down		down	down	down	down
Q9XXK4	frm-7	FERM domain-containing protein	-1.475	-1.597	-0.63	-0.03	0.163	0.449	-1.49	-1.199	-1.14	-0.308	-1.654	-0.401	-0.757	-1.156	down	down					down				down
Q22470	mrps-18b	Mitochondrial Ribosomal Protein, Small	-0.85	-0.856	-0.728	-0.55	-0.592	-0.551	-0.446	-0.392	-0.615	-0.51	-0.841	-0.732	-0.835	-0.732	down	down	down	down	down	down	down		down	down	down	down	down	down
Q9N5V3	imb-3	Importin N-terminal domain-containing protein	-0.986	-1.108	-0.933	-0.866	-0.922	-0.848	-0.275	-0.454	-0.772	-0.965	-0.861	-0.953	-1.048	-1.094	down	down	down	down	down	down	down	down	down	down	down	down	down	down
Q20007	CELE_F35A5.1	Uncharacterized protein	-0.576	-0.346	-0.276	-0.415	-0.537	-0.889	-0.552	-0.529	-0.495	-0.575	-0.172	-0.167	-0.484	-0.41	down			down	down	down	down	down	down	down
P92016	cest-1.2	Carboxylic ester hydrolase	-0.584	-0.34	-0.741	-0.388	-0.777	-0.368	-0.694	-0.786	-0.689	-0.991	-0.881	-0.461	-0.481	-0.456			down		down		down	down	down	down	down
Q27365	lin-15A	Protein lin-15A	-0.601	-0.618	-0.372	-0.366	-0.317	-0.015	-0.69	-0.975	-0.79	-0.624	-0.596	-1.271	-0.188	-0.424							down	down	down		down	down
G5EE11	CELE_F39H2.3	GCV_T domain-containing protein	-0.898	-1.097	-0.819	-0.63	-0.84	-0.588	-0.57	-0.902	-0.821	-1.026	-0.628	-1.176	-0.91	-0.956	down	down	down	down	down	down	down	down	down	down	down	down	down	down
Q9XXJ0	dhps-1	Deoxyhypusine synthase	-0.67	-0.589	-0.105	-0.216	-0.195	0.059	-0.779	-1.024	-0.929	-0.643	-1.165	-0.616	-1.491	-0.716							down	down	down		down		down
Q23256	wdr-5.3	WD repeat-containing protein wdr-5.3	0.555	0.416	1.43	1.599	1.589	1.065	0.801	0.751	1.119	1.634	0.686	0.503	0.511	0.544			up	up	up	up	up	up	up	up	up
O61826	fkb-7	Peptidylprolyl isomerase	-0.736	-1.634	-1.688	-0.398	-1.036	-0.007	-1.688	-1.948	-1.859	-3.105	-1.782	-1.984	0.106	-2.012		down	down				down	down	down	down	down	down		down
P77674	patD	Gamma-aminobutyraldehyde dehydrogenase	0.112	3.591	0.715	1.548	0.691	0.594	-1.985	0.669	0.92	0.522	1.558	1.524	2.064	-0.035		up		up			down						up
Q9N3D3	CELE_Y54E10BR.4	RNA-binding protein NOB1	-1.192	-1.34	-1.441	-1.744	-1.695	-1.85	-0.455	-0.644	-0.883	-0.933	-0.928	-1.081	-1.345	-1.243	down	down	down	down	down	down	down	down	down	down	down	down	down	down
O16299	figl-1	Fidgetin-like protein 1	1.549	1.589	1.713	1.756	1.446	1.176	1.18	0.947	1.648	1.263	1.773	0.831	1.643	1.505	up	up	up	up	up	up	up		up	up	up		up	up
O62106	eif-6	Eukaryotic translation initiation factor 6	-0.519	-0.563	-0.442	-0.703	-0.422	-0.644	-0.388	-0.371	-0.458	-0.313	-0.665	-0.466	-0.583	-0.413	down	down	down	down	down	down	down	down	down		down	down	down	down
P17139	emb-9	Collagen alpha-1(IV) chain	-0.096	0.37	0.351	0.748	0.747	1.088	-0.584	-0.77	-0.918	-0.451	-0.649	0.002	0.036	0.023				up	up	up	down	down	down		down
U4PEX3	CELE_Y77E11A.7	Uncharacterized protein	-0.005	-0.012	0.396	0.394	0.444	0.777	-0.583	-0.674	-0.266	-0.575	-0.717	-0.533	-0.027	-0.311					up	up	down	down		down	down	down
P90841	smgl-1	Uncharacterized protein	-0.331	-0.266	-0.235	-0.249	-0.223	-0.211	-0.343	-0.244	-0.145	-0.071	-0.358	-0.177	-0.263	-0.285	down			down			down				down
Q9XXU5	amx-2	Amino_oxidase domain-containing protein	-1.309	-1.392	-1.438	-0.798	-0.96	-0.631	-1.215	-2.154	-3.179	-2.061	-2.105	-2.136	-1.717	-1.787	down	down	down		down		down	down	down	down	down	down	down	down
O17373	pho-14	Intestinal acid PHOsphatase	1.587	1.572	1.847	2.13	2.073	1.947	-0.631	-0.358	0.296	0.39	0.798	0.912	1.39	1.706	up	up	up	up	up	up	down				up	up	up	up
Q09437	cdk-11.1	Cyclin-dependent kinase 11.1	0.282	0.505	0.747	0.625	0.681	0.84	0.497	0.305	0.28	0.357	0.291	0.373	0.472	0.591		up	up	up	up	up	up						up	up
A0A1I6CM66	hgap-2	Heterodimeric GTPase Activating Protein subunit	-0.309	-0.115	-0.012	-0.178	0.086	-0.076	-0.347	-0.2	-0.134	-0.13	-0.222	-0.026	-0.008	-0.176							down
G5EET5	hpl-1	Chromobox protein homolog hpl-1	-0.953	-2.146	-1.113	-1.734	-0.922	-1.038	-1.661	-2.234	-1.97	-1.15	-1.407	-2.201	-2.435	-2.605		down		down			down	down	down		down	down	down	down
H2FLJ1	stl-1	PHB domain-containing protein	-0.684	-0.717	-0.156	-0.153	0.043	0.26	-0.52	-0.882	-0.944	-0.99	-1.069	-0.971	-0.816	-1.079	down	down					down	down	down	down	down	down	down	down
Q19826	rpb-8	Probable DNA-directed RNA polymerases I, II, and III subunit RPABC3	-0.857	-1.118	-1.15	-1.148	-1.086	-0.937	-0.415	-0.737	-0.843	-0.787	-1.059	-1.024	-1.001	-1.081	down	down	down	down	down	down	down	down	down	down	down	down	down	down
O44997	dapk-1	Death-associated protein kinase dapk-1	1.036	1.25	2.033	1.661	1.728	2.23	1.559	0.977	0.59	1.349	0.699	1.383	0.257	0.898			up	up	up	up	up
P90860	CELE_F36A2.7	Uncharacterized protein	-0.577	-0.482	-0.894	-0.99	-0.882	-1.177	-0.387	-0.276	-0.095	-0.01	-0.366	-0.239	-0.441	-0.545	down	down	down	down	down	down	down				down		down	down
Q21243	acdh-8	Acyl CoA DeHydrogenase	-0.556	-0.692	-1.122	-1.204	-1.173	-0.991	-1.027	-1.322	-1.176	-1.832	-0.68	-1.187	-0.738	-1.162			down	down	down	down	down	down	down	down		down		down
Q9BKX6	fbxa-74	F-box domain-containing protein	-3.979	-4.228	-3.717	-3.216	-3.411	-3.326	-1.589	-2.216	-1.912	-3.334	-2.357	-3.712	-4.127	-3.629	down	down	down	down	down	down	down	down	down	down	down	down	down	down
P05825	fepA	Ferrienterobactin receptor	-0.62	1.969	-0.496	0.144	0.587	0.005	-1.677	-1.029	-0.689	-0.435	-0.029	0.309	0.563	-0.761		up					down
P41931	odc-1	Ornithine decarboxylase	-3.333	-2.986	-1.715	-2.261	-2.387	-2.067	-1.048	-1.423	-2.037	-1.084	-1.062	-1.79	-1.972	-2.833	down	down	down	down	down	down	down	down	down	down	down	down	down	down
Q9NAG2	mrpl-20	Mitochondrial Ribosomal Protein, Large	-1.014	-1.239	-1.812	-1.743	-1.503	-1.64	-0.753	-0.943	-0.953	-1.364	-0.818	-1.174	-1.184	-1.346	down	down	down	down	down	down	down	down	down	down	down	down	down	down
P91001	csn-5	COP9 signalosome complex subunit 5	0.56	0.361	0.247	0.254	0.159	0.239	0.389	0.469	0.53	0.355	0.587	0.472	0.478	0.405	up						up	up	up		up	up	up	up
Q20666	vha-18	Probable V-type proton ATPase subunit H 1	1.085	1.089	0.876	1.008	1.311	0.911	0.733	1.144	1.331	1.37	1.707	1.181	0.945	1.231	up	up	up	up	up	up	up	up	up	up	up	up	up	up
Q18581	acn-1	Inactive angiotensin-converting enzyme-related protein	-0.537	-0.26	-1.263	-1.481	-1.766	-0.784	-1.79	-1.344	-1.257	-1.548	-0.532	0.167	-0.438	-1.195				down	down		down
O18253	CELE_Y57G11C.31	Nucleotid_trans domain-containing protein	-2.788	-1.667	-3.032	-3.615	-3.179	-3.409	-1.236	-1.01	-1.423	-0.897	-1.631	-1.676	-2.561	-3.64	down	down	down	down	down	down	down		down		down	down	down	down
Q19876	thn-2	THaumatiN family	-0.663	-1.47	-2.269	-0.534	-1.114	-0.88	-3.011	-4.191	-2.034	-2.36	-0.251	-2.212	-0.187	-1.652			down				down	down
Q93339	prp-4	WD_REPEATS_REGION domain-containing protein	0.452	0.425	0.607	0.543	0.63	0.664	0.308	0.296	0.312	0.219	0.384	0.259	0.617	0.351	up	up	up	up	up	up	up	up	up		up		up	up
Q966H1	CELE_R05G9.3	Uncharacterized protein	1.049	0.59	-0.671	-0.356	0.081	-0.621	1.18	1.118	0.835	0.934	1.013	0.497	1.297	1.052							up	up			up		up
Q19687	CELE_F21D5.3	Plastocyanin-like domain-containing protein	-1.538	-1.189	-0.294	-0.31	-0.743	-0.707	-0.883	-1.245	-1.199	-1.368	-1.386	-1.113	-1.275	-2.648	down	down			down	down	down	down	down	down	down	down	down	down
P42620	yqjG	Glutathionyl-hydroquinone reductase YqjG	-0.817	1.342	0.182	0.007	0.28	0.349	-1.569	-0.713	-0.951	-0.73	0.095	0.302	-0.537	-0.679							down
Q94010	CELE_T08G11.1	Uncharacterized protein	0.268	0.301	0.21	0.238	0.257	0.185	-0.18	-0.139	0.067	0.144	0.297	0.209	0.176	0.211	up	up	up	up	up	up	down				up	up	up	up
Q20818	capg-2	CAP-G condensin subunit	0.349	0.732	0.322	0.452	0.457	0.824	0.759	0.179	0.022	-0.756	-0.39	-0.39	0.396	0.379		up				up	up			down
Q19004	aagr-1	P-type domain-containing protein	-0.449	0.012	-0.925	-0.999	-0.621	-0.794	-1.262	-0.306	0.033	1.349	0.29	-0.483	-0.032	-0.543				down			down			up
Q21763	CELE_R05H5.3	Thioredoxin domain-containing protein	0.603	0.446	0.782	0.91	0.628	0.986	0.526	0.434	0.247	0.293	0.511	0.412	0.713	0.655	up		up	up	up	up	up				up		up	up
Q19289	ifb-1	Intermediate filament protein ifb-1	0.6	0.751	0.609	0.706	0.759	0.914	-0.328	-0.285	-0.239	-0.251	0.137	0.183	0.335	0.296	up	up	up	up	up	up	down						up
O45783	CELE_T12D8.5	Uncharacterized protein	3.959	4.609	3.737	3.711	3.869	4.201	0.974	1.635	2.701	3.118	3.799	3.656	3.277	3.572	up	up	up	up	up	up	up	up	up	up	up	up	up	up
O62193	psf-2	Probable DNA replication complex GINS protein PSF2	0.367	0.271	0.759	0.703	0.448	0.801	0.566	0.542	0.015	0.027	0.124	0.13	0.224	0.514			up	up	up	up	up	up
Q19229	clec-57	C-type LECtin	-1.32	-1.679	0.04	0.363	-0.302	0.731	-2.241	-2.694	-2.631	-4.047	-2.191	-2.877	-3.26	-3.693							down	down	down	down	down	down	down	down
Q21109	endu-1	Endoribonuclease endu-1	1.753	1.834	2.224	2.066	2.644	2.019	-0.729	-0.551	-0.014	0.261	0.571	0.888	1.514	1.732	up	up	up	up	up	up	down					up	up	up
Q19138	CELE_F07A5.2	Uncharacterized protein	-4.909	-3.499	-3.436	-3.578	-4.259	-3.036	-2.383	-4.866	-4.424	-5.17	-3.62	-4.623	-4.492	-4.707	down	down	down	down	down	down	down	down	down	down	down	down	down	down
Q93759	swan-2	WD_REPEATS_REGION domain-containing protein	-0.765	-1.813	-0.184	-0.33	-0.264	-0.263	-0.879	-1.101	-0.897	-1.015	-1.111	-0.748	-0.619	-1.516		down					down	down	down	down	down			down
U4PMA7	plst-1	PLaSTin (Actin bundling protein) homolog	0.8	0.811	1.019	1.117	0.95	0.962	0.397	0.435	0.403	0.416	0.768	0.438	0.715	0.882	up	up	up	up	up	up	up	up	up	up	up	up	up	up
Q09599	cdl-1	Histone RNA hairpin-binding protein	1.485	1.471	1.46	1.501	1.409	1.937	0.814	0.431	-0.166	-0.251	0.267	0.341	1.58	0.966	up	up	up	up	up	up	up						up	up
O61820	eif-3.E	Eukaryotic translation initiation factor 3 subunit E	-1.048	-1.224	-0.769	-0.661	-0.577	-0.613	-0.461	-0.834	-0.932	-0.861	-1.237	-1.079	-1.259	-1.033	down	down	down	down	down	down	down	down	down	down	down	down	down	down
O02485	ZK1073.1	Uncharacterized protein ZK1073.1	0.596	0.582	0.578	0.476	0.751	0.689	-0.373	-0.348	-0.226	-0.07	-0.079	0.068	0.437	0.155	up	up	up	up	up	up	down	down					up
P34378	mrpl-18	39S ribosomal protein L18, mitochondrial	-0.879	-0.952	-0.606	-0.82	-0.755	-0.708	-0.52	-0.814	-0.796	-0.965	-0.998	-0.742	-1.142	-1.001	down	down	down	down	down	down	down	down	down	down	down	down	down	down
H2KYZ3	C24A3.2	Uncharacterized protein	-2.645	-3.566	2.28	2.811	2.551	2.929	-2.872	-3.383	-3.801	-3.191	-5.942	-3.067	-3.832	-3.782		down	up	up	up	up	down	down	down	down	down	down	down	down
Q9N408	ddp-1	Mitochondrial import inner membrane translocase subunit Tim8	-0.84	-1.102	-0.652	-0.718	-0.886	-0.853	-0.508	-0.638	-0.715	-0.65	-0.75	-0.785	-1.047	-0.865	down	down	down	down	down	down	down	down	down	down	down	down	down	down
Q18093	C18E9.2	Translocation protein SEC62	-0.706	-0.752	-0.287	-0.347	-0.193	-0.398	-0.578	-0.969	-0.9	-1.067	-0.629	-1.023	-0.913	-0.93	down	down					down	down	down	down	down	down	down	down
P34643	sec-16A.1	Protein transport protein sec-16A.1	-0.222	-0.353	-0.456	-0.594	-0.384	-0.641	-0.295	-0.246	0.014	0.036	-0.148	-0.084	-0.076	-0.316		down	down	down	down	down	down							down
Q95YC6	C45B2.1	Uncharacterized protein	-1.276	-1.994	-1.296	-1.165	-0.907	-0.358	-0.803	-1.265	-1.372	-1.667	-1.493	-1.805	-2.336	-1.667	down	down	down	down	down		down	down	down	down	down	down	down	down
Q9BL33	CELE_Y71H2AM.4	Uncharacterized protein	-1.287	-1.423	-1.799	-1.602	-1.525	-1.699	-0.401	-0.601	-0.768	-0.701	-1.021	-0.906	-1.098	-1.158	down	down	down	down	down	down	down	down	down	down	down	down	down	down
Q22505	immt-1	MICOS complex subunit MIC60-1	-0.66	-0.512	-0.908	-1.132	-1.109	-1.279	-0.32	-0.353	-0.281	-0.343	-0.183	-0.342	-0.56	-0.74	down	down	down	down	down	down	down	down	down	down		down	down	down
D5MCN2	larp-1	La-related protein 1	-1.178	-1.433	-1.562	-1.447	-1.502	-1.723	-0.485	-0.76	-0.911	-1.212	-1.095	-1.272	-1.423	-1.326	down	down	down	down	down	down	down	down	down	down	down	down	down	down
Q9NA25	ndx-8	Peroxisomal coenzyme A diphosphatase ndx-8	0.629	0.755	-0.211	0.02	-0.475	-0.274	1.165	1.869	1.892	1.519	0.971	0.529	0.79	0.539							up	up	up	up	up
O45310	C49A1.10	Uncharacterized protein	-1.036	-0.724	0.296	0.461	0.481	0.461	-0.854	-1.154	-0.903	-1.268	-1.198	-0.656	-1.346	-0.812	down						down	down	down	down	down		down
Q94392	nsf-1	Vesicle-fusing ATPase	-0.375	-0.445	-0.165	-0.089	-0.142	0.05	-0.288	-0.324	-0.374	-0.288	-0.384	-0.43	-0.417	-0.415	down	down					down	down	down	down	down	down	down	down
P90917	rba-1	Probable histone-binding protein rba-1	1.072	0.824	1.476	1.418	1.301	1.495	0.455	0.355	0.543	0.595	0.79	0.702	1.078	1.059	up	up	up	up	up	up	up		up	up	up	up	up	up
A0A2C9C2Y0	unc-108	Uncharacterized protein	-0.813	-0.914	-0.86	-0.721	-0.703	-0.591	-0.475	-0.797	-0.976	-1.132	-0.993	-1.033	-0.995	-0.982	down	down	down	down	down	down	down	down	down	down	down	down	down	down
Q9NA97	CELE_Y53F4B.23	Uncharacterized protein	-2.058	-3.22	-1.78	-1.584	-1.413	-0.943	-1.509	-1.783	-1.806	-2.137	-2.003	-2.662	-2.734	-2.135	down	down	down	down	down		down	down	down	down	down	down	down	down
G5EGF7	B0457.2	Uncharacterized protein	-1.01	-1.558	-0.75	1.092	1.144	0.657	-2.701	-2.275	-2.959	-2.967	-2.883	-2.217	-2.551	-2.11							down		down	down	down
O16331	catp-3	Cation_ATPase_N domain-containing protein	0.527	0.059	-0.767	-0.722	-0.504	-0.957	-1.011	0.692	1.551	1.133	1.3	1.122	0.697	-0.108			down			down	down		up	up	up	up
Q27526	bgal-1	Beta-galactosidase	1.201	1.056	0.735	0.712	0.796	0.63	-0.544	-0.181	0.611	0.826	0.902	0.87	0.991	1.088	up	up	up	up	up	up	down		up	up	up	up	up	up
P21693	dbpA	ATP-dependent RNA helicase DbpA	-1.843	-1.964	-2.689	-3.307	-2.634	-2.869	-2.09	-1.973	-3.015	-4.007	-1.482	-2.967	-2.444	-4.061			down	down	down	down	down	down	down	down		down	down	down
Q22888	ife-4	Eukaryotic translation initiation factor 4E-4	-0.634	-0.875	-0.604	-0.586	-0.441	-0.315	-0.71	-0.893	-0.915	-0.768	-1.147	-0.854	-0.812	-1.105		down	down	down			down	down	down	down	down	down	down	down
B0M0L8	hsp-43	SHSP domain-containing protein	1.9	1.644	2.273	2.601	2.652	2.542	0.516	0.698	0.489	0.691	1.004	1.179	1.426	1.469	up	up	up	up	up	up	up	up	up	up	up	up	up	up
Q22032	ttr-27	TransThyretin-Related family domain	-2.441	-2.883	-2.175	-2.076	-3.203	-2.608	-2.367	-3.754	-3.794	-4.605	-2.585	-3.562	-2.995	-2.921	down	down	down	down	down	down	down	down	down	down	down	down	down	down
Q21525	taap-1	TAil-Anchored Protein	-0.928	-0.718	-0.651	-0.759	-0.515	-0.877	-0.472	-0.665	-0.368	-0.439	-0.592	-0.47	-1.026	-0.85	down	down	down	down	down	down	down	down			down	down	down	down
G5EE65	hsp-12.1	Heat-shock protein 12.1	-1.739	-1.766	-1.437	-1.481	-1.499	-1.673	-1.047	-1.46	-1.251	-0.918	-1.671	-1.628	-1.78	-2.635	down	down	down	down	down	down	down	down	down		down	down	down	down
G5EEA8	nex-1	Annexin	0.478	0.234	0.578	0.656	0.711	0.764	-0.473	-0.409	-0.431	-0.251	-0.213	0.015	-0.022	0.185	up		up	up	up	up	down		down
O61847	cdk-2	Cyclin-dependent kinase 2	-0.018	-0.178	0.169	0.08	0.214	0.044	0.669	0.532	0.38	0.83	0.671	0.351	0.012	0.493							up			up	up
Q965X1	CELE_Y39A3CL.7	Uncharacterized protein	0.584	0.33	0.761	0.678	0.727	1.087	0.614	0.242	0.09	0.254	0.049	0.208	0.769	0.292			up	up	up	up	up						up
Q95YF0	cls-1	Protein CLASP-1	-3.273	-1.824	-2.991	-3.085	-3.098	-2.797	-1.578	-2.165	-3.149	-3.221	-2.99	-3.287	-1.87	-3.193	down	down	down	down	down	down	down	down	down	down	down	down	down	down
Q17446	pmk-1	Mitogen-activated protein kinase pmk-1	-0.918	-0.996	-0.811	-1.017	-0.836	-0.774	-0.41	-0.351	-0.653	-0.47	-0.914	-0.809	-0.838	-1.111	down	down	down	down	down	down	down		down	down	down	down	down	down
O16202	lys-7	Lysozyme-like protein 7	3.342	3.046	2.251	2.645	2.695	1.981	1.212	2.083	2.847	3.5	4.013	3.651	3.844	3.687	up	up	up	up	up	up	up	up	up	up	up	up	up	up
Q09353	ulp-1	Sentrin-specific protease	0.599	0.363	0.846	0.752	0.751	0.851	0.296	0.055	0.114	0.232	0.149	0.178	0.54	0.565	up	up	up	up	up	up	up						up	up
Q11176	unc-78	Actin-interacting protein 1	-0.194	-0.544	-0.321	-0.406	-0.615	-0.613	-0.347	-0.404	-0.319	-0.048	-0.318	-0.18	-0.202	-0.12		down	down	down	down	down	down	down	down		down
A0A0K3AQM0	lim-9	LIM domain family	-0.539	-0.229	-0.84	-0.631	-0.907	-0.69	-0.652	-0.622	-0.659	-0.478	-0.661	-0.362	-0.683	-0.677			down	down	down	down	down	down	down		down		down	down
Q19126	asb-2	ATP synthase F(0) complex subunit B2, mitochondrial	-1.013	-0.962	-1.301	-1.526	-1.473	-1.629	-0.442	-0.433	-0.406	-0.242	-0.609	-0.537	-0.992	-1.086	down	down	down	down	down	down	down	down	down		down	down	down	down
O02053	san-1	BUB1 N-terminal domain-containing protein	0.632	0.974	1.551	1.565	1.582	1.453	0.607	0.656	0.483	1.087	0.561	1.11	1.229	1.335	up	up	up	up	up	up	up	up		up	up	up	up	up
G5ECK4	CELE_Y37A1B.17	Uncharacterized protein	-0.342	-0.228	-0.022	-0.005	-0.036	-0.054	-0.295	-0.327	-0.399	-0.306	-0.262	-0.063	-0.206	-0.336	down						down	down	down	down	down			down
O44471	grd-10	Ground-like domain-containing protein	-2.418	-3.632	-3.625	-2.669	-2.763	-2.584	-1.432	-2.224	-2.829	-2.678	-2.825	-3.645	-3.23	-2.766	down	down	down	down	down	down	down	down	down	down	down	down	down	down
Q23652	usip-1	U6 snRNA-specific terminal uridylyltransferase	0.763	0.877	1.468	1.469	1.524	1.689	0.48	0.313	0.221	0.348	0.353	0.454	0.833	0.845	up	up	up	up	up	up	up					up	up	up
Q9XW92	vha-13	V-type proton ATPase catalytic subunit A	-1.013	-0.981	-0.545	-0.395	-0.703	-0.445	-0.519	-0.831	-1.096	-1.001	-1.06	-0.894	-1.141	-1.071	down	down	down	down	down	down	down	down	down	down	down	down	down	down
G5EFG0	sel-1	SEL-1	-0.375	-0.433	-0.39	-0.443	-0.3	-0.426	-0.302	-0.298	-0.404	-0.376	-0.424	-0.312	-0.345	-0.482	down	down	down	down	down	down	down	down	down	down	down	down	down	down
Q93565	tli-1	ToLlIp homolog	-0.152	-0.16	-0.251	0.043	-0.216	0.226	-0.514	-0.648	-0.399	-0.437	-0.31	-0.132	-0.554	-0.347							down	down					down
G5EFG4	abcf-2	ABC transporter, class F	-1.277	-1.346	-1.495	-1.513	-1.476	-1.601	-0.349	-0.605	-0.907	-1.058	-1.029	-1.192	-1.256	-1.185	down	down	down	down	down	down	down	down	down	down	down	down	down	down
P34686	cap-2	F-actin-capping protein subunit beta	-0.417	-0.803	-0.548	-0.435	-0.452	-0.301	-0.446	-0.73	-1.004	-1.274	-0.75	-0.932	-0.777	-0.786		down	down	down	down		down	down	down	down	down	down	down	down
Q27506	cyp-14a1	CYtochrome P450 family	1.448	1.803	1.163	0.602	1.258	1.153	1.673	1.844	2.093	2.358	1.487	2.111	0.549	1.273		up			up		up	up	up	up	up	up
Q11178	attf-4	AT hook-containing protein attf-4	-0.836	-0.713	-2.657	-2.068	-3.11	-1.833	-1.956	-3.178	-3.205	-3.404	-2.328	-3.549	-1.603	-1.981			down	down	down	down	down	down	down	down	down	down		down
P32131	hemN	Oxygen-independent coproporphyrinogen III oxidase	-0.479	1.249	-0.064	-0.167	0.24	-0.287	-1.599	-1.167	-0.759	-0.404	-0.85	0.211	-0.184	-0.543							down
H2KMK6	CELE_Y38E10A.22	Uncharacterized protein	0.128	-0.029	0.395	0.494	0.305	0.316	0.366	0.382	0.34	0.269	0.323	0.002	0.196	0.285			up	up	up	up	up	up	up		up
O45667	dod-17	CUB_2 domain-containing protein	-4.747	-4.44	-3.861	-3.412	-3.504	-3.584	-1.789	-1.86	-3.49	-3.094	-3.179	-4.943	-3.293	-3.105	down	down	down	down	down	down	down	down	down	down	down	down	down	down
O02640	mdh-2	Malate dehydrogenase, mitochondrial	-0.691	-0.79	-0.515	-0.615	-0.66	-0.795	-0.299	-0.432	-0.387	-0.256	-0.316	-0.334	-0.707	-0.638	down	down	down	down	down	down	down	down	down		down	down	down	down
Q22146	frk-1	Fer-related kinase 1	-2.796	-1.596	0.076	-0.373	-0.591	-0.399	-2.578	-2.538	-3.077	-2.928	-3.118	-2.978	-2.641	-2.51	down						down	down	down	down	down	down	down
Q23612	dhs-26	DeHydrogenases, Short chain	-1.29	0.036	-0.734	-0.586	-0.47	-0.052	-2.203	-0.474	-0.359	1.502	0.152	0.613	-0.192	-0.664							down
G5EBU3	zmp-3	Matrix metalloproteinase-C	0.57	0.466	0.514	0.595	0.84	1.076	-0.551	-0.586	-0.5	-0.531	-0.068	0.007	0.01	0.125	up		up	up	up	up	down	down	down
Q9NEN6	rps-6	40S ribosomal protein S6	-1.775	-1.839	-2.417	-2.442	-2.463	-2.493	-0.606	-1.071	-1.59	-1.801	-1.5	-1.898	-1.898	-2.021	down	down	down	down	down	down	down	down	down	down	down	down	down	down
Q95Y79	zig-9	Ig-like domain-containing protein	0.742	0.715	0.814	0.832	0.359	0.645	-0.621	-0.567	-0.099	-0.126	0.362	0.286	0.417	0.624	up	up	up	up		up	down							up
Q18421	C34C12.8	GrpE protein homolog, mitochondrial	-1.071	-1.289	-0.973	-0.853	-1.01	-1.088	-0.338	-0.593	-0.619	-0.601	-1.004	-1.009	-1.283	-1.157	down	down	down	down	down	down	down	down	down	down	down	down	down	down
O62421	CELE_Y32F6B.1	Solute carrier organic anion transporter family member	-0.818	-1.112	-0.95	-0.791	-1.045	-1.302	-1.335	-0.515	-0.364	-1.259	-0.097	-0.611	-0.397	-0.682					down	down	down
P36609	ncs-2	Neuronal calcium sensor 2	-0.93	-0.536	-1.108	-1.14	-1.215	-1.045	-0.404	-0.508	-0.758	-0.886	-0.649	-0.824	-0.788	-1.119	down	down	down	down	down	down	down	down	down	down	down	down	down	down
P0A940	bamA	Outer membrane protein assembly factor BamA	0.226	3.055	1.589	2.093	1.941	1.47	-1.923	0.447	0.656	0.58	1.488	1.446	1.697	0.403		up	up	up	up	up	down
O62055	C09F9.2	Uncharacterized protein	2.386	3.709	0.983	0.952	0.917	1.979	2.34	2.42	1.324	0.053	1.799	1.571	3.05	2.672	up	up				up	up	up					up	up
P41958	ced-9	Apoptosis regulator ced-9	0.605	0.903	0.983	0.719	1.166	0.7	1.079	0.688	0.844	1.42	0.586	0.318	0.24	0.158			up		up		up			up
Q9U241	CELE_Y56A3A.19	Acyl carrier protein	-0.9	-0.99	-1.319	-1.113	-1.404	-1.372	-0.557	-0.864	-1.06	-0.886	-0.756	-0.82	-1.159	-1.215	down	down	down	down	down	down	down	down	down	down	down	down	down	down
O02642	sucl-2	Succinate--CoA ligase [ADP/GDP-forming] subunit alpha, mitochondrial	-0.702	-0.702	-0.679	-0.504	-0.564	-0.623	-0.335	-0.646	-0.778	-0.586	-0.622	-0.72	-0.869	-0.63	down	down	down	down	down	down	down	down	down	down	down	down	down	down
Q09227	C08B11.9	Uncharacterized protein C08B11.9	-1.104	-1.194	-0.525	-0.544	-0.675	-0.43	-0.441	-0.737	-1.392	-1.014	-1.307	-1.442	-1.136	-1.191	down	down	down	down	down	down	down	down	down	down	down	down	down	down
Q9U217	faah-4	Monoglyceride lipase faah-4	0.863	0.679	0.979	1.044	0.899	0.94	0.37	0.692	0.666	0.525	0.692	0.934	0.812	0.804	up	up	up	up	up	up	up	up	up	up	up	up	up	up
Q18036	C16A3.5	NADH dehydrogenase [ubiquinone] 1 beta subcomplex subunit 9	-0.972	-1.351	-1.514	-1.405	-1.406	-1.403	-0.383	-0.478	-0.741	-0.656	-0.866	-0.807	-1.249	-1.169	down	down	down	down	down	down	down	down	down	down	down	down	down	down
P0A6E4	argG	Argininosuccinate synthase	-2.008	1.644	-0.904	0.78	-0.006	-0.964	-2.585	-0.997	-0.624	-1.669	-0.01	0.102	0.486	-1.469							down
Q22875	soc-2	Leucine-rich repeat protein soc-2	-0.444	-0.466	-0.575	-0.768	-0.46	-0.635	-0.394	-0.512	-0.521	-0.453	-0.661	-0.577	-0.571	-0.694	down	down	down	down	down	down	down	down	down	down	down	down	down	down
P77338	mscK	Mechanosensitive channel MscK	0.85	1.537	0.648	1.315	1.296	0.871	1.182	0.085	-0.137	0.187	1.38	0.937	1.073	0.241		up		up	up		up				up
Q7Z1Q3	alh-12	Aldedh domain-containing protein	-2.54	-2.332	-3.35	-3.459	-3.661	-3.568	-0.707	-0.729	-1.224	-1.452	-1.608	-1.515	-2.339	-2.655	down	down	down	down	down	down	down	down	down	down	down	down	down	down
Q22798	CELE_T26A5.8	CBFD_NFYB_HMF domain-containing protein	0.935	0.672	1.01	1.123	0.783	1.08	0.783	0.624	0.4	0.12	0.89	0.464	1.026	1.033	up		up	up	up	up	up				up		up	up
O17274	lgc-34	Neur_chan_LBD domain-containing protein	-0.633	-0.712	-0.86	-0.721	-0.81	-0.946	-0.384	-0.63	-0.461	-0.62	-0.453	-0.379	-0.693	-0.6	down	down	down	down	down	down	down	down	down	down	down	down	down	down
Q9XU10	mlh-1	DNA_mis_repair domain-containing protein	1.325	1.166	0.892	0.702	0.883	1.277	1.254	1.422	0.809	0.756	1.254	0.856	1.046	1.466	up					up	up	up			up			up
P91859	maph-1.1	Microtubule-associated protein homolog maph-1.1	-0.173	-0.086	-0.243	-0.246	-0.285	-0.286	-0.477	-0.441	-0.405	-0.107	-0.298	-0.174	-0.135	-0.249							down	down
O01927	spin-1	MFS domain-containing protein	-0.442	-0.389	0.045	0.132	-0.091	0.11	-0.516	-0.927	-1.126	-1.192	-0.866	-0.543	-0.415	-0.626							down	down	down	down	down	down		down
Q95QG7	exos-8	Ribosomal RNA-processing protein 43	-3.071	-2.008	-3.113	-3.308	-3.374	-2.973	-2.026	-2.538	-3.855	-3.888	-2.579	-3.16	-2.963	-2.73	down	down	down	down	down	down	down	down	down	down	down	down	down	down
P04982	rbsD	D-ribose pyranase	-0.916	-0.143	-0.528	-0.358	-0.616	-0.792	-0.712	-1.303	-0.46	-1.161	-0.743	-0.937	-0.586	-0.691	down				down	down	down	down		down	down	down
Q20969	CELE_F58B3.4	NUC153 domain-containing protein	-0.846	-0.976	-0.691	-0.747	-0.7	-0.871	-0.46	-0.791	-0.781	-0.914	-1.013	-0.956	-1.085	-0.859	down	down	down	down	down	down	down	down	down	down	down	down	down	down
Q9U3F2	dna-2	DNA replication ATP-dependent helicase/nuclease DNA2	2.229	2.109	2.613	2.486	2.386	2.073	0.815	1.06	1.068	1.962	2.12	1.831	1.888	2.188	up	up	up	up	up	up	up	up	up	up	up	up	up	up
Q86S61	ugt-31	Glucuronosyltransferase	0.194	0.278	-0.252	-0.346	-0.374	-0.331	-0.638	-0.156	0.411	1.02	0.386	0.894	0.301	0.164							down			up		up
Q9U307	gln-3	Glutamine synthetase	-1.881	-1.71	-2.347	-2.938	-2.566	-2.899	-0.538	-0.117	-0.041	0.046	-0.38	-0.539	-1.447	-1.776	down	down	down	down	down	down	down					down	down	down
Q22781	acdh-7	Acyl CoA DeHydrogenase	0.021	0.258	-0.103	-0.273	-0.228	-0.298	-0.461	-0.381	-0.195	-0.377	0.148	-0.059	-0.029	-0.081							down
C6KRN4	CELE_D1086.11	Uncharacterized protein	-0.007	-0.177	0.228	0.473	0.626	-0.391	-0.935	-0.954	-1.486	-0.837	-0.687	-0.738	-0.198	-0.149							down	down	down
Q9NAI5	CELE_Y39G8B.1	Aldo_ket_red domain-containing protein	-1.177	-1.094	-1.519	-1.75	-1.624	-1.509	-0.385	-0.41	-0.431	-0.55	-0.597	-0.684	-0.751	-1.267	down	down	down	down	down	down	down	down	down	down	down	down	down	down
P91529	W09C3.4	Probable DNA-directed RNA polymerase III subunit RPC6	-1.741	-1.868	-1.223	-1.237	-1.298	-0.966	-0.764	-1.321	-1.582	-1.459	-2.1	-1.744	-2.065	-2.189	down	down	down	down	down	down	down	down	down	down	down	down	down	down
O62424;Q4U220	CELE_Y38H8A.4	Protein kinase domain-containing protein	-1.999	-1.197	-1.461	-0.836	-0.848	-0.998	-1.334	-2.235	-2.094	-1.512	-1.073	-1.437	-2.587	-1.971	down		down				down	down	down	down		down	down	down
Q18621	C44E12.1	M20_dimer domain-containing protein	-0.339	-0.412	-0.798	-1.434	-0.756	-1.145	1.011	0.941	1.007	0.805	0.678	0.573	0.248	-0.455			down	down	down	down	up	up	up
Q9U1W1	tfg-1	Protein tfg-1	-1.076	-1.101	-1.705	-1.923	-2.027	-1.697	-0.603	-0.717	-0.633	-1.004	-0.804	-1.043	-0.845	-1.315	down	down	down	down	down	down	down	down	down	down	down	down	down	down
Q21915	lpd-8	NFU1 iron-sulfur cluster scaffold homolog, mitochondrial	-1.04	-1.03	-0.783	-0.906	-0.949	-1.229	-0.441	-0.42	-0.361	-0.519	-0.471	-0.661	-1.022	-0.913	down	down	down	down	down	down	down	down		down	down	down	down	down
O17328	mct-6	MFS domain-containing protein	-1.424	-1.337	-1.35	-1.039	-1.398	-1.142	-0.498	-0.922	-1.22	-1.141	-1.265	-1.047	-1.421	-1.323	down	down	down	down	down	down	down	down	down	down	down	down	down	down
P31224	acrB	Multidrug efflux pump subunit AcrB	-0.983	1.987	0.584	0.74	0.344	0.145	-1.703	-0.796	-0.677	-0.96	-0.226	0.29	0.661	-0.361		up					down
Q9NAP0	clec-190	C-type LECtin	6.139	5.749	6.034	6.322	6.182	5.277	1.44	3.886	5.106	4.838	5.827	5.376	6.283	6.143	up	up	up	up	up	up	up	up	up	up	up	up	up	up
G5EE66	cogc-1	Conserved oligomeric Golgi complex subunit 1	-0.533	-0.581	-0.187	-0.178	-0.137	-0.244	-0.379	-0.338	-0.293	-0.269	-0.434	-0.322	-0.4	-0.362	down	down					down				down		down
G5EBL2	mes-1	Protein mes-1	1.115	0.927	0.272	1.128	0.962	0.709	1.521	1.792	1.997	1.634	1.343	2.082	1.324	0.787							up	up	up	up	up	up
H2L067	mex-3	Muscle EXcess	0.784	0.533	1.376	1.479	1.304	1.073	0.57	0.858	1.122	0.873	1.126	0.524	0.802	1.068	up		up	up	up	up	up	up	up	up	up		up	up
H2KZ24	C27H5.2	TDP43_N domain-containing protein	1.265	0.757	1.777	1.4	1.468	1.37	1.072	0.976	1.505	2.379	1.799	1.678	1.59	1.799	up		up	up	up	up	up		up	up	up	up	up	up
G5EEW6	sig-7	Peptidyl-prolyl cis-trans isomerase sig-7	0.444	0.051	0.641	0.63	0.665	0.811	0.4	0.243	0.212	0.345	0.158	0.136	0.709	0.35	up		up	up	up	up	up						up
O18003	sbsp-1	SMB domain-containing protein	-3.083	-0.69	-2.551	-1.575	-2.225	-1.887	-1.639	-3.041	-2.906	-2.526	-2.62	-2.565	-2.452	-1.815	down		down	down	down	down	down	down	down	down	down	down	down	down
P76193	ynhG	Probable L,D-transpeptidase YnhG	-0.111	3.037	0.086	0.726	0.415	-0.19	-2.679	-0.537	0.149	-0.245	1.436	1.243	1.301	-0.793		up					down
O62265	CELE_F57C2.5	Str_synth domain-containing protein	-0.213	0.092	-0.387	-0.526	-0.323	-0.287	0.448	0.632	0.632	0.991	0.336	0.394	0.126	-0.036			down	down	down		up	up	up	up
Q9N2L7	plk-2	Serine/threonine-protein kinase plk-2	0.232	0.113	-0.15	-0.121	-0.136	-0.617	0.434	0.584	0.84	0.838	0.674	0.498	0.151	0.531						down	up	up	up	up	up	up		up
A3QMC5	rpl-34	60S ribosomal protein L34	-1.824	-2.004	-2.402	-2.288	-2.4	-2.389	-0.52	-0.939	-1.19	-1.079	-1.402	-1.623	-1.742	-1.73	down	down	down	down	down	down	down	down	down	down	down	down	down	down
G5EEK9	vha-5	V-type proton ATPase 116 kDa subunit a 2	-0.777	-0.929	-0.327	-0.149	-0.327	-0.278	-0.412	-0.885	-1.245	-1.1	-1.291	-0.789	-0.94	-0.903	down	down	down		down		down	down	down	down	down	down	down	down
B1Q273	CELE_D1086.10	Uncharacterized protein	1.72	1.562	1.786	1.436	1.569	1.08	-1.187	-0.244	0.263	0.893	0.355	0.899	1.483	1.863	up	up	up	up	up	up	down						up	up
Q7Z2A9	grd-13	GRounDhog (Hedgehog-like family)	-0.9	-1.417	-0.992	-0.687	-0.895	-0.464	-0.981	-1.401	-1.153	-0.684	-1.505	-1.092	-1.519	-1.283		down	down		down		down	down	down		down	down	down	down
K8ERV5	tnt-4	TropoNin T	-2.136	-2.131	-1.352	-1.136	-1.825	-1.103	-0.947	-1.382	-1.73	-2.054	-2.106	-1.923	-2.33	-2.132	down	down	down	down	down	down	down	down	down	down	down	down	down	down
Q86G91	flp-33	FMRF-Like Peptide	-1.515	-1.302	-1.555	-1.75	-1.252	-0.761	-1.036	-0.813	-0.656	-0.667	-1.209	-1.171	-1.237	-1.968	down	down	down	down	down		down				down	down	down	down
Q17703	stdh-1	Putative steroid dehydrogenase 1	0	-0.009	-0.434	-0.613	-0.352	-0.275	-0.531	-0.249	0.517	0.801	0.644	0.43	0.238	-0.072			down	down			down		up	up	up
O01869	rps-10	S10_plectin domain-containing protein	-0.718	-0.907	-0.558	-0.491	-0.51	-0.725	-0.339	-0.351	-0.59	-0.415	-0.694	-0.635	-0.886	-0.713	down	down	down	down	down	down	down	down	down	down	down	down	down	down
Q9XWR1	flh-1	FLYWCH transcription factor 1	1.308	1.292	1.77	1.633	1.566	2.075	0.974	0.563	0.583	0.095	0.454	-0.543	1.526	1.161	up	up	up	up	up	up	up						up	up
Q22250	plpr-1	AcidPPc domain-containing protein	-0.645	-0.652	-1.595	-1.506	-1.236	-1.146	-1.088	-1.263	-1.535	-1.297	-1.54	-1.008	-1.786	-0.635			down	down	down	down	down	down	down	down	down		down
P34675	ZK688.5	Uncharacterized protein ZK688.5	0.419	0.498	0.72	0.867	0.621	0.778	0.306	0.177	0.461	0.569	0.584	0.341	0.636	0.57	up	up	up	up	up	up	up		up	up	up	up	up	up
Q9NEI6	mrps-35	MRP-S28 domain-containing protein	-0.88	-0.938	-0.752	-0.674	-0.696	-0.915	-0.347	-0.461	-0.559	-0.545	-0.554	-0.71	-0.796	-0.781	down	down	down	down	down	down	down	down	down	down	down	down	down	down
Q93831	CELE_F59C6.5	NADH dehydrogenase [ubiquinone] 1 beta subcomplex subunit 10	-0.847	-1.077	-1.69	-1.384	-1.532	-1.504	-0.395	-0.63	-0.79	-0.769	-0.743	-0.827	-0.963	-1.12	down	down	down	down	down	down	down	down	down	down	down	down	down	down
Q21333	CELE_K08E4.2	GLTP domain-containing protein	-0.42	0.086	0.604	0.666	0.833	0.988	-1.151	-0.495	-0.648	0.21	-0.862	-0.408	-0.248	-0.8					up	up	down
A0A7R9SVJ0	Y51H7C.13	Uncharacterized protein	-1.471	-1.458	-1.304	-2.117	-1.63	-0.898	-1.488	-1.578	-2.226	-2.262	-1.744	-1.41	-2.428	-1.859			down	down	down		down	down	down	down	down		down	down
P0A8G6	wrbA	NAD(P)H dehydrogenase (quinone)	-0.397	2.979	0.184	0.993	0.386	-0.046	-2.62	-0.046	0.231	-0.056	1.164	1.558	1.555	-1.356		up					down
Q95PY4	mrps-18a	Mitochondrial Ribosomal Protein, Small	-0.688	-0.76	-0.656	-0.896	-0.621	-0.859	-0.449	-0.374	-0.532	-0.476	-0.58	-0.635	-0.825	-0.616	down	down	down	down	down	down	down		down	down	down	down	down	down
O01802	rpl-7	60S ribosomal protein L7	-1.149	-1.377	-1.302	-1.137	-1.242	-1.346	-0.302	-0.506	-0.719	-0.96	-0.904	-0.975	-1.158	-1.128	down	down	down	down	down	down	down	down	down	down	down	down	down	down
Q9XUU8	CELE_K05C4.5	Uncharacterized protein	-1.11	-1.187	-1.584	-1.545	-1.543	-1.527	-0.509	-0.892	-1.066	-1.475	-1.187	-1.295	-1.481	-1.216	down	down	down	down	down	down	down	down	down	down	down	down	down	down
Q09582	metr-1	Probable methionine synthase	-2.31	-2.078	-2.077	-2.006	-2.132	-2.013	-0.401	-0.555	-1.291	-1.718	-1.814	-1.723	-2.502	-2.024	down	down	down	down	down	down	down	down	down	down	down	down	down	down
Q23597	CELE_ZK809.3	NADH dehydrogenase [ubiquinone] 1 beta subcomplex subunit 6	-0.669	-0.602	-0.917	-0.939	-0.913	-1.072	-0.34	-0.31	-0.209	0.111	-0.358	-0.315	-0.487	-0.463	down	down	down	down	down	down	down				down		down	down
Q20849	rod-1	Kinetochore-associated protein rod-1	0.144	0.009	0.649	0.701	0.685	0.859	0.425	0.265	0.328	0.269	0.001	0.08	0.275	0.328			up	up	up	up	up
P0AD27	yejM	Inner membrane protein YejM	-1.204	2.058	0.27	0.326	0.297	0.003	-1.821	-1.085	-0.448	-0.063	0.237	0.697	0.237	-0.629		up					down
O45926	cyb-2.1	Cyclin N-terminal domain-containing protein	0.73	0.913	0.911	1.078	0.43	0.31	1.341	1.21	0.567	0.497	1.276	0.644	0.654	0.199				up			up				up
Q22842	CELE_T28B11.1	F-box domain-containing protein	0.764	0.539	0.807	0.865	0.853	1.316	-1.181	-0.084	0.018	0.602	0.128	-0.058	0.652	0.192						up	down
Q9NF11	hprt-1	Hypoxanthine phosphoribosyltransferase	-3.265	-2.852	-3.506	-3.783	-3.739	-3.733	-0.59	-0.978	-1.585	-1.938	-1.866	-2.213	-2.471	-3.013	down	down	down	down	down	down	down	down	down	down	down	down	down	down
Q18390;Q9XUR1	C33F10.12	Phosphate carrier protein, mitochondrial;Phosphate carrier protein, mitochondrial	-2.379	-2.92	-1.244	-1.319	-1.156	-0.786	-1.087	-2.088	-2.426	-1.616	-2.839	-1.976	-2.826	-2.458	down	down	down	down	down		down	down	down	down	down	down	down	down
Q94272	fah-1	Fumarylacetoacetase	-1.957	-1.954	-2.177	-2.135	-2.154	-2.159	-0.534	-0.684	-0.82	-0.917	-1.032	-1.044	-1.355	-1.799	down	down	down	down	down	down	down	down	down	down	down	down	down	down
Q19752	fntb-1	Protein farnesyltransferase subunit beta	-1.69	-1.901	-2.334	-2.026	-2.109	-1.695	-0.955	-1.617	-1.697	-2.565	-1.908	-2.414	-2.116	-2.135	down	down	down	down	down	down	down	down	down	down	down	down	down	down
Q18429	chdh-1	Choline dehydrogenase	-0.271	-0.474	-0.37	-0.196	-0.412	-0.332	-0.345	-0.384	-0.385	-0.152	-0.04	-0.127	-0.497	-0.561		down	down		down	down	down	down	down				down	down
Q8I7H9	ttr-33	Transthyretin-like protein 33	1.165	0.729	0.828	1.131	0.826	1.143	-0.673	-0.194	0.092	-0.14	0.479	0.222	1.009	0.791	up	up	up	up	up	up	down						up	up
G5EFZ7	mrpl-42	Mitochondrial Ribosomal Protein, Large	-2.427	-3.644	-0.845	-0.487	-1.053	-0.585	-1.712	-3.268	-3.029	-3.098	-3.185	-2.245	-2.441	-3.464	down	down					down	down	down	down	down	down	down	down
G5EDN6	cnb-1	Protein phosphatase 2B regulatory subunit cnb-1	-1.811	-1.642	-2.044	-2.061	-2.183	-1.807	-1.037	-1.19	-1.667	-1.42	-1.59	-1.754	-1.634	-2.283	down	down	down	down	down	down	down	down	down	down	down	down	down	down
P0A7A7	plsB	Glycerol-3-phosphate acyltransferase	-0.411	1.855	0.088	0.674	0.36	-0.096	-1.594	-0.686	-0.894	-0.587	-0.122	-0.189	0.64	-0.513		up					down
P34268	fli-1	Protein flightless-1 homolog	0.154	-0.027	0.242	0.101	0.164	0.199	-0.388	-0.279	-0.235	0.157	-0.161	0.015	0.116	0.118							down
G5EG43	PRL-1	Putative prenylated protein tyrosine phosphatase	-0.845	-0.587	0.183	0.359	0.889	0.087	-1.288	-0.297	-0.13	-0.113	-0.095	-0.128	-0.925	-0.778							down
P0A9J0	rng	Ribonuclease G	-1.315	1.635	-0.479	0.002	-0.016	-0.343	-2.92	-2	-0.615	-0.162	-0.042	0.646	0.696	-1.198							down
Q9TZM2	mop-25.3	MO25-like protein 3	1.522	1.573	0.737	1.064	1.241	1.074	0.951	1.262	1.131	1.506	1.236	1.078	1.466	1.342	up	up		up	up	up	up	up	up	up	up	up	up	up
P0ABA4	atpH	ATP synthase subunit delta	0.357	3.688	1.59	2.14	1.4	1.476	-2.164	-0.125	0.932	1.071	1.796	1.673	2.302	1.042		up		up			down						up
Q21712	CELE_R04D3.2	Uncharacterized protein	1.028	1.203	1.01	1.373	1.145	0.933	0.966	0.931	0.332	0.928	1.308	1.599	1.015	1.246	up	up	up	up	up	up	up	up			up	up	up	up
O62515	ZK550.6	Probable phytanoyl-CoA dioxygenase	0.652	0.92	0.066	-0.425	0.011	-0.425	0.582	0.49	0.47	0.63	0.706	0.865	0.946	0.661	up	up					up			up	up	up	up	up
P91369	CELE_K11H12.4	Uncharacterized protein	-1.416	-0.543	-1.374	-1.133	-0.626	-0.927	-0.975	-1.11	-1.886	-1.718	-1.708	-1.437	-1.496	-1.472	down		down	down		down	down	down	down	down	down	down	down	down
V6CLC2	hgap-1	Rap-GAP domain-containing protein	-0.588	-0.646	-0.281	-0.316	-0.344	-0.224	-0.336	-0.394	-0.565	-0.371	-0.616	-0.356	-0.451	-0.666	down	down	down	down	down		down	down	down	down	down	down	down	down
P34278	knl-1	Kinetochore null protein 1	0.677	0.619	0.805	0.862	0.701	0.957	0.509	0.318	0.235	0.438	0.075	0.178	0.7	0.729	up	up	up	up	up	up	up						up	up
Q9XXR5	ttr-26	TransThyretin-Related family domain	3.548	3.179	4.173	4.125	4.638	2.901	-1.448	0.124	0.846	0.755	2.618	2.036	2.772	3.362	up	up	up	up	up	up	down				up	up	up	up
H2KZ74	CELE_T25B2.2	Uncharacterized protein	0.001	0.222	0.089	0.288	0.246	0.459	-0.504	-0.497	-0.817	-0.354	-0.463	-0.13	-0.228	-0.465						up	down	down	down		down
Q9XW00	ddl-3	Daf-16-Dependent Longevity (WT but not daf-16 lifespan increased)	-0.542	-0.632	-0.85	-0.856	-0.723	-0.816	-0.296	-0.23	-0.197	-0.064	-0.348	-0.351	-0.757	-0.593	down	down	down	down	down	down	down				down	down	down	down
Q966G0	rmd-6	Regulator of Microtubule Dynamics	-3.578	-2.503	-2.537	-2.319	-2.411	-2.487	-1.831	-3.234	-2.739	-2.809	-2.988	-1.786	-3.528	-3.324	down	down	down	down	down	down	down	down	down	down	down	down	down	down
Q20129	mus-101	Uncharacterized protein	0.261	0.568	0.712	0.66	0.478	0.227	0.566	0.591	0.595	0.669	0.491	0.547	0.497	0.499			up	up	up		up	up	up	up	up	up
Q20772	F54D5.7	Probable glutaryl-CoA dehydrogenase, mitochondrial	0.035	0.058	0.027	0.003	-0.052	0.003	0.32	0.377	0.445	0.425	0.421	0.425	0.2	0.104							up	up	up	up	up	up
Q20107	fkb-1	Peptidylprolyl isomerase	-0.332	-0.479	-0.471	-0.512	-0.566	-0.55	-0.336	-0.208	-0.13	-0.184	-0.254	-0.24	-0.321	-0.338		down	down	down	down	down	down
Q19905	sqv-4	UDP-glucose 6-dehydrogenase	-0.113	-0.307	-0.059	0.189	-0.047	0.224	0.479	0.079	-0.214	-0.399	-0.163	-0.376	-0.233	-0.259							up
Q21504	CELE_M04B2.4	DAO domain-containing protein	-0.923	-0.879	-0.611	-0.845	-0.659	-0.935	-0.491	-0.738	-0.402	-0.504	-0.841	-0.558	-0.989	-0.817	down	down	down	down	down	down	down	down			down	down	down	down
Q9XW44	spe-46	Uncharacterized protein	-3.549	-3.235	-3.077	-3.484	-3.338	-2.92	-1.331	-4.063	-3.717	-2.735	-3.527	-3.33	-4.45	-3.863	down	down	down	down	down	down	down	down	down	down	down	down	down	down
P83351	snap-29	Soluble NSF attachment protein 29	0.372	0.294	0.711	0.546	0.765	0.75	0.357	0.542	0.593	0.407	0.69	0.498	0.268	0.374	up		up	up	up	up	up	up	up	up	up	up		up
Q20636	gpb-2	Guanine nucleotide-binding protein subunit beta-2	-0.468	-0.209	-0.137	-0.411	-0.239	0.012	-0.49	-1.007	-0.685	-1.413	-0.734	-0.533	-0.625	-0.778				down			down	down	down	down	down	down	down	down
Q93619	bckd-1b	Transket_pyr domain-containing protein	-0.732	-0.696	-0.81	-0.986	-0.854	-0.789	-0.373	-0.2	-0.441	-0.458	-0.332	-0.462	-0.668	-0.807	down	down	down	down	down	down	down		down	down	down	down	down	down
O45637	CELE_K02B7.3	Uncharacterized protein	0.619	0.996	1.023	0.869	0.663	0.534	-1.282	-1.274	-0.655	-1.161	-0.011	-0.202	0.422	0.335			up				down	down
O16254	CELE_F44E7.9	Uncharacterized protein	-1.592	-1.904	-1.617	-1.416	-1.718	-1.479	-0.802	-1.522	-1.56	-1.929	-1.523	-1.997	-1.427	-1.268	down	down	down	down	down	down	down	down	down	down	down	down	down	down
H2KYX4	C23H3.2	Uncharacterized protein	-1.717	-1.388	-0.077	0.144	0.183	0.272	-1.08	-1.457	-1.599	-1.997	-2.035	-1.422	-1.063	-1.415	down	down					down	down	down	down	down	down		down
L8E6W9	CELE_F55F10.1	Midasin	-1.12	-1.396	-1.006	-1.101	-1.149	-0.938	-0.546	-0.92	-1.12	-1.3	-1.516	-1.279	-1.491	-1.365	down	down	down	down	down	down	down	down	down	down	down	down	down	down
Q9U757	nxt-1	NTF2-related export protein	-0.475	-0.624	0.3	0.276	0.422	0.416	-0.405	-0.551	-0.42	-0.675	-0.757	-0.452	-0.22	-0.324	down	down			up	up	down	down	down	down	down	down
O61787	inx-16	Innexin-16	0.667	0.727	1.412	1.521	1.376	1.48	-0.652	-0.512	0.118	0.116	0.072	0.774	0.607	0.67		up	up	up	up	up	down					up
O45815	act-5	ACTin	-1.522	-1.243	-1.471	-1.527	-1.617	-1.418	-0.65	-0.92	-1.439	-1.157	-1.506	-1.242	-1.609	-1.367	down	down	down	down	down	down	down	down	down	down	down	down	down	down
P75958	lolE	Lipoprotein-releasing system transmembrane protein LolE	0.445	1.214	1.393	1.269	1.236	1.204	1.068	0.449	0.367	0.446	0.6	0.58	0.633	-0.023		up	up	up	up	up	up
Q86MH6	CELE_T08B6.9	Uncharacterized protein	-0.795	-0.897	0.16	-1.114	-1.066	-0.794	-2.934	-2.288	-1.452	-0.374	-1.057	-0.514	-1.229	-2.263							down
P55955	ttr-16	Transthyretin-like protein 16	1.039	1.22	1.765	1.756	1.802	1.749	-0.51	-0.741	-0.347	-0.383	0.258	0.232	0.699	0.816	up	up	up	up	up	up	down	down					up	up
P15877	gcd	Quinoprotein glucose dehydrogenase	-0.6	1.912	-0.31	0.163	-0.124	0.413	-1.633	-0.931	-0.703	-1.045	0.384	0.382	0.647	-0.732		up					down
P68066	grcA	Autonomous glycyl radical cofactor	-1.007	0.723	0.05	0.666	0.907	0.494	-2.199	-0.13	-0.674	-1.004	0.163	0.772	0.212	-0.782							down
O01454	C03G6.5	UPF0376 protein C03G6.5	-0.676	0.038	-1.745	-2.509	-1.304	-1.405	-1.329	-1.992	-1.17	-1.018	-0.314	-0.163	-0.393	-0.405			down	down	down	down	down	down
Q8MNR9	CELE_F25B4.8	CENP-V/GFA domain-containing protein	-2.361	-2.55	-2.263	-1.97	-2.388	-2.05	-1.11	-1.326	-1.938	-1.602	-1.884	-2.914	-2.35	-2.335	down	down	down	down	down	down	down	down	down	down	down	down	down	down
Q94416	CELE_ZK858.7	tRNA (adenine(58)-N(1))-methyltransferase non-catalytic subunit TRM6	-0.741	-0.56	-0.192	-0.245	-0.287	-0.484	-0.409	-0.581	-0.572	-0.7	-0.694	-0.627	-0.673	-0.516	down	down				down	down	down	down	down	down	down	down	down
G5EF48	fld-1	TLC domain-containing protein fld-1	0.458	0.768	0.749	0.74	0.789	0.997	-0.463	-0.568	-0.259	-0.123	-0.311	0.092	0.596	0.339		up	up	up	up	up	down	down					up
Q18803	asg-2	Probable ATP synthase subunit g 2, mitochondrial	-1.573	-1.758	-2.623	-2.586	-2.806	-2.45	-0.852	-1.331	-1.642	-1.589	-1.577	-1.447	-1.805	-2.36	down	down	down	down	down	down	down	down	down	down	down	down	down	down
O76357	ilys-3	Invertebrate-type lysozyme 3	0.015	-0.75	0.472	-0.301	1.828	0.477	-1.436	-1.174	-0.864	-0.54	-1.077	-0.53	-0.097	-0.073					up		down
Q20637	CELE_F52A8.1	Uncharacterized protein	-2.439	-1.66	-1.148	-1.496	-1.382	-1.49	-1.908	-2.922	-1.82	-1.793	-1.852	-1.974	-2.669	-1.742	down			down		down	down	down	down		down	down	down
O45430	mccc-1	MethylCrotonoyl-Coenzyme A Carboxylase (Alpha)	-0.908	-0.939	-1.081	-1.057	-1.063	-1.062	-0.235	-0.349	-0.429	-0.542	-0.63	-0.603	-0.962	-0.887	down	down	down	down	down	down	down	down	down	down	down	down	down	down
Q21352	CELE_K08F4.3	Translocon-associated protein subunit beta	0.527	0.255	0.378	0.545	0.483	-0.029	0.667	0.66	1.241	1.582	0.949	1.067	0.499	0.99				up			up	up	up	up	up	up		up
P23678	unc-104	Kinesin-like protein unc-104	-0.45	-0.327	0.319	0.304	0.236	0.225	-0.515	-0.465	-0.68	-0.275	-0.538	-0.082	-0.303	-0.435							down		down		down
Q21899	CELE_R10E4.1	BTB domain-containing protein	-0.594	-0.384	-0.059	-0.413	-0.128	-0.114	-0.484	-0.49	-0.709	-0.551	-0.595	-0.676	-0.391	-0.559	down			down			down	down	down	down	down	down		down
O18240	rps-18	40S ribosomal protein S18	-1.542	-1.703	-1.58	-1.458	-1.551	-1.506	-0.404	-0.77	-1.271	-1.68	-1.504	-1.468	-1.711	-1.724	down	down	down	down	down	down	down	down	down	down	down	down	down	down
P90795	gpdh-3	Probable glycerol-3-phosphate dehydrogenase, mitochondrial	-0.115	-0.175	-0.17	-0.35	-0.307	-0.532	-0.296	-0.144	0.023	0.152	0.333	0.036	-0.074	-0.198				down	down	down	down				up
Q19087	dnpp-1	Aspartyl aminopeptidase	-1.162	-1.514	-1.254	-1.419	-1.615	-1.449	-0.541	-0.755	-1.017	-0.854	-1.042	-0.658	-1.029	-1.115	down	down	down	down	down	down	down	down	down	down	down	down	down	down
Q93167	C01G10.7	HpcH_HpaI domain-containing protein	1.382	1.169	1.021	0.983	1.043	0.958	0.424	0.673	0.808	1.27	1.079	1.285	1.011	1.277	up	up	up	up	up	up	up	up	up	up	up	up	up	up
P91423	CELE_T03F1.11	Uncharacterized protein	-2.308	-1.251	-1.345	-1.294	-1.393	-1.522	-0.689	-1.013	-0.887	-0.79	-1.314	-0.967	-1.727	-1.668	down	down	down	down	down	down	down	down	down	down	down	down	down	down
S6FMZ4	flcn-1	Folliculin	1.188	1.387	1.146	0.97	1.256	1.485	0.957	0.873	0.794	1.565	0.359	1.124	1.116	0.825	up	up	up	up	up	up	up			up		up	up
Q17657	C05D12.2	Uncharacterized protein	0.755	1.095	1.195	1.347	1.116	1.454	-0.63	-0.218	-0.044	0.484	0.517	0.846	0.523	0.944	up	up	up	up	up	up	down					up		up
Q965N4	chin-1	CHImaeriN (Rac-GTPase-activating protein) homolog	0.66	0.527	0.631	0.7	0.693	0.7	0.345	0.464	0.44	0.194	0.699	0.36	0.499	0.66	up	up	up	up	up	up	up	up	up		up	up	up	up
Q21065	ifa-3	Intermediate filament protein ifa-3	0.505	0.79	0.932	1.309	1.024	1.042	-1.079	-0.456	-0.485	-0.948	0.16	-0.114	0.215	0.179			up	up	up	up	down
P34580	T26G10.1	Putative ATP-dependent RNA helicase T26G10.1	-1.582	-1.529	-2.194	-2.444	-2.226	-2.407	-0.629	-0.925	-1.135	-1.231	-1.403	-1.338	-1.435	-1.63	down	down	down	down	down	down	down	down	down	down	down	down	down	down
Q23146	rab-7	RAB family	-1.172	-1.592	-1.015	-1.018	-1.186	-0.846	-0.441	-0.891	-1.052	-1.944	-1.351	-1.25	-1.542	-1.375	down	down	down	down	down	down	down	down	down	down	down	down	down	down
Q9XVT7	C01A2.2	Uncharacterized protein	-0.573	-0.618	-1.236	-2.325	-1.527	-1.281	-1.124	-0.683	-0.19	0.31	0.049	-0.065	-0.412	-0.542			down	down	down	down	down
Q2XMZ1	CELE_F30A10.13	Uncharacterized protein	0.821	-0.214	-0.727	-1.083	-0.734	-0.904	-1.379	-0.759	-0.413	0.636	0.162	0.273	0.937	0.844				down			down
O18196	noa-1	G domain-containing protein	-0.919	-1.156	-0.586	-0.769	-0.688	-0.781	-0.421	-0.398	-0.442	-0.509	-0.839	-0.623	-0.804	-0.785	down	down	down	down	down	down	down		down	down	down	down	down	down
H2L034	pmp-5	ABC transmembrane type-1 domain-containing protein	-3.868	-3.655	-3.797	-3.671	-3.737	-3.688	-0.723	-0.85	-1.594	-1.604	-2.768	-2.448	-3.195	-3.498	down	down	down	down	down	down	down	down	down	down	down	down	down	down
Q9N2Z7	wwp-1	E3 ubiquitin-protein ligase wwp-1	-0.115	-0.177	-0.221	-0.268	-0.277	-0.152	-0.263	-0.353	-0.263	-0.228	-0.223	-0.269	-0.115	-0.299			down	down	down		down	down	down			down		down
G4SG25	fbxa-4	F-box domain-containing protein	-1.696	-2.479	-1.605	-0.749	-1.572	-1.459	-1.244	-0.914	-1.377	-1.675	-1.201	-1.623	-2.352	-1.623	down	down	down		down	down	down		down	down	down	down	down	down
Q18412	sgo-1	Shugoshin	1.154	0.8	1.322	1.124	1.457	1.451	0.854	0.921	1.236	1.238	0.998	0.912	1.502	1.389	up		up	up	up	up	up	up	up	up	up	up	up	up
Q9TZI9	spe-15	Myosin motor domain-containing protein	-1.141	-1.279	-0.036	-0.732	-0.127	-0.341	-1.166	-1.224	-1.48	-1.434	-0.984	-1.393	-1.03	-0.643		down					down	down	down	down		down
Q22751	dnj-23	J domain-containing protein	0.492	0.477	0.943	0.95	0.778	1.152	0.552	0.439	0.269	0.048	0.285	0.13	0.693	0.528			up	up	up	up	up						up
Q8I4F7	set-18	Histone-lysine N-methyltransferase set-18	-3.357	-3.481	-2.764	-2.994	-3.053	-3.335	-1.264	-1.861	-2.287	-1.617	-3.262	-2.545	-3.315	-3.736	down	down	down	down	down	down	down	down	down	down	down	down	down	down
O45903	W09H1.5	Enoyl-[acyl-carrier-protein] reductase, mitochondrial	-0.259	-0.132	-0.587	-0.57	-0.51	-0.325	-0.379	-0.268	-0.534	-0.558	-0.066	-0.277	-0.36	-0.417			down	down	down	down	down		down	down				down
Q95X85	CELE_F22E5.17	FBA_2 domain-containing protein	0.935	1.206	0.205	0.33	0.459	0.264	0.822	0.962	1.568	2.259	1.595	1.62	0.638	1.407	up	up					up	up	up	up	up	up		up
P91307	CELE_F46F11.7	Uncharacterized protein	0.084	-0.154	-0.603	-0.786	-0.186	-0.243	-1.173	-0.409	-0.676	-0.737	-0.667	-0.556	-0.721	-0.025							down
P34657	ZK632.12	Uncharacterized protein ZK632.12	0.158	0.156	-0.399	-0.296	-0.205	-0.173	-0.422	-0.305	-0.326	-0.1	-0.225	-0.216	-0.079	-0.094			down				down
Q17850	pak-1	Serine/threonine-protein kinase pak-1	0.186	0.532	0.481	0.406	0.515	0.329	-0.303	-0.289	-0.131	0.079	-0.078	0.031	0.268	0.209		up	up	up	up	up	down
Q19390	acp-5	ACid Phosphatase family	0.833	1.343	0.695	0.993	1.016	1.223	-0.519	-0.132	0.057	0.27	0.283	1.005	0.898	0.789	up	up	up	up	up	up	down					up	up	up
Q93618	F27D4.4	Zinc finger CCCH domain-containing protein 15 homolog	-0.509	-0.641	-0.427	-0.417	-0.466	-0.584	-0.414	-0.536	-0.617	-0.926	-0.745	-0.604	-0.768	-0.496	down	down	down	down	down	down	down	down	down	down	down	down	down	down
Q8IAA5	CELE_Y50D7A.10	ADF-H domain-containing protein	-3.344	-2.642	-2.94	-3.081	-3.672	-2.633	-1.925	-2	-2.717	-3.593	-3.798	-2.731	-3.322	-3.433	down	down	down	down	down	down	down	down	down	down	down	down	down	down
O44411	nog-1	Nucleolar GTP-binding protein 1	-1.61	-1.698	-1.937	-2.093	-1.938	-2.148	-0.466	-0.921	-1.393	-1.527	-1.649	-1.625	-1.889	-1.719	down	down	down	down	down	down	down	down	down	down	down	down	down	down
Q23495	toe-1	HEAT repeat-containing protein 1 homolog	-1.425	-1.708	-2	-2.034	-1.851	-1.994	-0.555	-1.091	-1.36	-1.604	-1.474	-1.522	-1.669	-1.582	down	down	down	down	down	down	down	down	down	down	down	down	down	down
Q17455	pitr-3	Phosphate transporter	2.355	2.467	2.298	2.516	2.269	2.533	1.308	1.666	1.469	0.901	2.232	1.592	2.53	1.923	up	up	up	up	up	up	up	up	up		up	up	up	up
O76258	tsg-101	Tumor Susceptibility Gene homolog	-0.454	-0.333	-0.021	0.024	0.058	0.01	-0.323	-0.275	-0.124	-0.024	-0.345	-0.13	-0.249	-0.332	down	down					down				down
O02293	CELE_T02E1.2	Uncharacterized protein	-1.296	-1.728	-2.008	-1.617	-1.787	-1.859	-1.28	-1.073	-0.824	-1.576	-1.573	-1.009	-1.799	-1.221		down	down	down	down	down	down			down	down		down
Q9BL03	CELE_Y54F10AM.5	NADH dehydrogenase [ubiquinone] 1 alpha subcomplex subunit 8	-1.569	-1.197	-1.564	-1.418	-1.65	-1.492	-0.674	-0.906	-0.613	-0.19	-1.148	-1.175	-1.224	-1.377	down	down	down	down	down	down	down	down			down	down	down	down
P53014	mlc-3	Myosin, essential light chain	-0.977	-0.979	-1.438	-1.359	-1.682	-1.41	-0.442	-0.788	-0.9	-0.921	-0.686	-0.58	-1.075	-1.078	down	down	down	down	down	down	down	down	down	down	down	down	down	down
P39451	adhP	Alcohol dehydrogenase, propanol-preferring	-0.477	0.576	0.276	0.411	0.011	-0.222	-1.064	-0.751	-0.68	-0.812	-0.412	0.017	-0.045	-1.19							down							down
Q9XVF7	rpl-2	60S ribosomal protein L8	-0.849	-1.091	-0.974	-0.922	-0.974	-1.328	-0.416	-0.451	-0.598	-0.691	-0.746	-0.798	-0.944	-0.641	down	down	down	down	down	down	down	down	down	down	down	down	down	down
Q65XX9	mvk-1	MeValonate Kinase	-0.645	-0.534	-0.579	-0.546	-0.577	-0.48	-0.232	-0.477	-0.558	-0.436	-0.649	-0.753	-0.71	-0.741	down	down	down	down	down	down	down	down	down	down	down	down	down	down
P10299	gst-1	Glutathione S-transferase P	0.568	0.823	0.775	0.684	0.774	0.723	0.329	0.361	0.419	0.566	0.783	0.542	0.756	0.543	up	up	up	up	up	up		up	up	up	up	up	up	up
Q94271	asp-14	Peptidase A1 domain-containing protein	-2.828	-2.84	-2.666	-2.945	-3.16	-3.398	-1.109	-1.623	-1.45	-1.818	-3.686	-3.516	-3.626	-3.484	down	down	down	down	down	down		down	down	down	down	down	down	down
Q93353	idhb-1	Probable isocitrate dehydrogenase [NAD] subunit beta, mitochondrial	-0.816	-0.794	-1.14	-1.28	-1.23	-1.13	-0.389	-0.508	-0.61	-0.486	-0.408	-0.553	-0.857	-0.891	down	down	down	down	down	down		down	down	down	down	down	down	down
Q9N3T2	crn-1	Flap endonuclease 1	0.538	0.558	0.826	1.006	0.799	1.254	0.572	0.244	-0.021	-0.299	0.343	-0.109	0.723	0.544			up	up	up	up							up
O01868	rpl-24.1	60S ribosomal protein L24	-2.321	-2.375	-2.622	-1.961	-2.557	-2.221	-0.915	-1.26	-2.028	-1.716	-2.194	-2.02	-2.298	-2.338	down	down	down	down	down	down		down	down	down	down	down	down	down
Q21481	dhs-28	SCP2 domain-containing protein	-2.096	-1.985	-2.341	-2.573	-2.397	-2.523	-0.545	-1.132	-1.764	-1.511	-1.805	-1.696	-2.056	-2.037	down	down	down	down	down	down		down	down	down	down	down	down	down
O76449	CELE_ZK1055.7	Uncharacterized protein	-0.623	0.051	-0.83	-0.819	-0.038	-0.158	-0.776	-0.619	-0.409	0.23	-0.34	-0.549	-0.732	-0.971			down	down										down
Q22482	CELE_T14B4.3	Uncharacterized protein	0.204	0.324	0.271	0.463	0.285	0.251	0.509	0.775	0.926	0.911	0.734	0.337	0.291	0.61				up				up	up	up	up			up
P0ABJ9	cydA	Cytochrome bd-I ubiquinol oxidase subunit 1	-1.705	1.69	-0.619	0.06	-0.412	-0.261	-2.401	-2.097	-0.965	-1.585	-0.155	-0.105	0.502	-1.783
Q18846	rskn-2	Putative ribosomal protein S6 kinase alpha-2	-1.339	-1.051	-1.417	-1.961	-1.747	-1.659	-0.724	-0.875	-0.804	-0.694	-0.934	-0.621	-1.19	-1.199	down	down	down	down	down	down		down	down		down		down	down
O17850	atx-3	Ataxin-3 homolog	0.508	0.592	0.541	0.693	0.686	0.814	0.427	0.385	0.235	0.129	0.53	0.365	0.81	0.44	up	up	up	up	up	up					up		up
Q09235	C13B9.2	Uncharacterized protein C13B9.2	1.794	1.834	1.67	2.408	1.437	2.236	1.496	1.115	1.093	1.683	1.352	1.054	2.191	2.031	up	up	up	up	up	up				up	up		up	up
P0AFD6	nuoI	NADH-quinone oxidoreductase subunit I	-0.364	1.966	0.602	0.876	0.899	0.864	-2.254	-1.209	-0.101	-0.725	0.619	0.529	0.856	0.267
O16264	F40A3.3	Phosphatidylethanolamine-binding protein homolog F40A3.3	-0.708	-0.878	-0.793	-0.647	-1.169	-0.703	-0.488	-0.683	-0.809	-0.677	-0.667	-0.777	-0.772	-0.804	down	down	down	down	down	down		down	down	down	down	down	down	down
Q20263	eas-1	Probable Golgi transport protein 1	-1.77	-2.043	-1.925	-2.387	-2.013	-1.773	-1.286	-2.116	-1.734	-1.258	-2.511	-1.389	-2.078	-1.254	down	down	down	down	down	down		down	down		down	down	down
A3QMC8	tag-335	Mannose-1-phosphate guanyltransferase beta	-1.027	-0.932	-0.816	-0.914	-0.811	-0.901	-0.342	-0.486	-0.826	-0.608	-0.928	-0.99	-0.904	-0.897	down	down	down	down	down	down		down	down	down	down	down	down	down
G5EBN9	snf-3	Sodium- and chloride-dependent betaine transporter	0.084	-0.001	0.472	0.476	0.511	0.37	-0.6	-0.381	-0.476	0.157	-0.641	-0.088	-0.05	0.028				up	up						down
D9PTP5	snx-6	PX domain-containing protein	0.17	-0.076	0.243	0.242	0.28	0.2	0.188	0.405	0.353	0.094	0.416	0.076	0.249	0.057			up	up	up	up		up	up		up		up
Q95QL1	CELE_F13H8.11	Lipase_GDSL domain-containing protein	0.993	1.153	0.801	0.808	1.018	1.117	-1.056	-1.198	-0.861	-1.653	0.473	-0.018	0.323	0.518		up			up	up		down		down
Q9XTT4	ani-1	Anillin-like protein 1	0.887	0.793	0.982	0.926	0.903	1.066	0.307	0.388	0.479	0.5	0.645	0.494	0.823	0.923	up	up	up	up	up	up		up	up	up	up	up	up	up
Q9U2K1	pqn-83	CX domain-containing protein	0.517	0.436	1.007	1.063	1.072	0.992	-0.467	-0.427	-0.317	-0.586	0.042	0.231	0.324	0.061	up		up	up	up	up				down
Q93485	obr-2	Oxysterol-binding protein	-0.901	-0.848	-0.508	-1.103	-0.778	-0.608	-1.032	-1.115	-0.582	-0.566	-0.985	-1.226	-0.845	-1.144				down				down			down	down		down
Q9BKU3	eif-2alpha	Eukaryotic translation initiation factor 2 subunit 1	-0.819	-1.097	-1.286	-1.213	-1.252	-1.065	-0.336	-0.487	-0.635	-0.539	-0.752	-0.851	-0.929	-0.856	down	down	down	down	down	down		down	down	down	down	down	down	down
G5EED5	scm-1	Secretory carrier-associated membrane protein	-0.549	-0.564	-0.554	-0.417	-0.429	-0.423	-0.527	-0.748	-0.864	-1.328	-0.686	-1.032	-0.66	-0.889		down	down	down	down	down		down	down	down	down	down	down	down
O61980	unc-23	BAG domain-containing protein	-1.369	-1.738	-1.247	-1.507	-1.335	-1.611	-0.887	-0.957	-1.195	-1.079	-1.332	-1.46	-1.34	-1.888	down	down	down	down	down	down		down	down	down	down	down	down	down
Q21549	gss-1	Glutathione synthetase	-1.029	-0.777	-0.931	-1.013	-0.9	-0.981	-0.296	-0.389	-0.575	-0.604	-0.783	-0.826	-0.879	-0.993	down	down	down	down	down	down		down	down	down	down	down	down	down
O17570	rpl-38	60S ribosomal protein L38	-2.008	-2.5	-1.252	-1.056	-1.328	-1.432	-0.711	-1.558	-1.684	-1.903	-2.304	-1.956	-2.327	-2.108	down	down	down	down	down	down		down	down	down	down	down	down	down
Q18966	wbp-2	GRAM domain-containing protein	-0.609	-0.683	-0.998	-0.875	-0.909	-0.437	-0.473	-0.603	-0.848	-0.84	-0.896	-0.814	-0.541	-0.942	down	down	down	down	down	down		down	down	down	down	down	down	down
O45319	tin-13	Mitochondrial import inner membrane translocase subunit tim-13	-0.631	-0.744	-0.51	-0.482	-0.661	-0.757	-0.311	-0.415	-0.426	-0.278	-0.447	-0.47	-0.682	-0.566	down	down	down	down	down	down		down	down		down	down	down	down
Q22290	CELE_T07C4.3	Uncharacterized protein	0.222	0.111	0.261	0.402	0.266	0.122	0.349	0.18	0.232	0.291	0.273	0.282	0.247	0.433				up	up									up
O61397	gly-7	Probable N-acetylgalactosaminyltransferase 7	-0.572	-0.502	-0.615	-0.609	-0.452	-0.649	-0.358	-0.338	-0.324	-0.25	-0.437	-0.423	-0.366	-0.433	down	down	down	down	down	down					down	down		down
P0C0V0	degP	Periplasmic serine endoprotease DegP	-0.783	1.588	-0.008	0.551	0.045	0.097	-1.954	-0.274	-0.041	0.33	0.598	0.2	0.587	-0.987
P91997	CELE_F53F1.2	Aldo_ket_red domain-containing protein	-0.862	-1.109	-1.189	-1.168	-1.244	-1.136	0.388	0.518	0.433	0.008	-0.052	-0.129	-0.601	-1.073	down	down	down	down	down	down		up	up				down	down
O16725	CELE_T07D3.9	Uncharacterized protein	-0.193	-0.011	-1.063	-1.046	-0.986	-0.946	0.395	1.03	1.134	1.064	0.659	0.681	0.055	-0.064			down	down	down	down		up	up	up	up	up
P0AB26	yceB	Uncharacterized lipoprotein YceB	0.752	3.216	1.19	1.599	0.899	1.721	1.303	0.828	0.003	0.947	0.212	0.746	1.695	1.495		up	up	up		up							up	up
P0A6H5	hslU	ATP-dependent protease ATPase subunit HslU	0.067	3.274	1.361	1.54	1.222	1.064	-2.258	0.076	0.55	0.019	1.409	1.428	1.907	0.828		up
A5JYR8	col-118	Col_cuticle_N domain-containing protein	-0.112	0.068	-0.411	-0.069	-0.314	0.21	-0.761	-1.012	-0.656	-0.269	-0.257	-0.54	-0.277	-0.343								down
O44572	tni-4	Troponin I 4	-1.058	-0.985	-1.522	-1.285	-1.564	-1.432	-0.495	-0.804	-0.901	-1.027	-1.058	-0.986	-1.193	-1.125	down	down	down	down	down	down		down	down	down	down	down	down	down
Q965S8	eif-3.I	Eukaryotic translation initiation factor 3 subunit I	-0.812	-0.944	-0.732	-0.898	-0.612	-0.894	-0.468	-0.552	-0.613	-0.479	-1.156	-0.765	-1.002	-0.703	down	down	down	down	down	down		down	down		down	down	down	down
B3WFW4	CELE_D2005.7	Uncharacterized protein	-3.566	-4.397	-3.778	-3.477	-4.003	-3.776	-1.588	-2.341	-3.675	-2.419	-3.437	-2.464	-4.084	-4.271	down	down	down	down	down	down		down	down	down	down	down	down	down
P34640	ZK512.2	Probable ATP-dependent RNA helicase DDX55 homolog	-1.261	-1.503	-1.791	-1.856	-1.661	-1.851	-0.467	-0.907	-1.157	-1.464	-1.481	-1.276	-1.514	-1.42	down	down	down	down	down	down		down	down	down	down	down	down	down
A5Z2V7	CELE_F02E9.10	WD_REPEATS_REGION domain-containing protein	0.659	0.522	0.799	0.777	0.866	0.904	0.345	0.449	0.374	0.629	0.544	0.334	0.795	0.605	up	up	up	up	up	up		up	up	up	up		up	up
Q9N2Z6	ptr-21	SSD domain-containing protein	-0.001	-0.615	-0.16	-0.339	-0.384	-0.398	0.444	0.453	0.197	0.466	-0.067	0.257	0.024	-0.166		down			down	down		up
P42000	B0280.9	U3 small nucleolar RNA-associated protein 18 homolog	-1.025	-1.3	-1.288	-1.561	-1.387	-1.48	-0.44	-0.648	-0.949	-0.727	-1.04	-1.135	-1.212	-1.135	down	down	down	down	down	down		down	down	down	down	down	down	down
Q23429	htas-1	Histone H2A	-1.296	-0.801	-0.986	-0.324	-0.523	-0.445	-1.058	-2.015	-0.915	-0.847	-1.977	-1.822	-2.439	-1.644	down		down					down			down	down	down	down
Q23490	mlt-7	Peroxidase mlt-7	-0.918	-1.462	-1.051	-0.766	-0.706	-1.039	-0.985	-1.218	-1.261	-0.991	-1.3	-1.155	-1.231	-0.957		down	down			down		down	down		down	down	down
P0A910	ompA	Outer membrane protein A	-0.297	3.05	0.25	1.039	0.413	0.214	-2.537	-0.62	0.446	0.025	1.258	1.347	1.724	-0.305		up
Q93615	F27D4.1	Probable electron transfer flavoprotein subunit alpha, mitochondrial	-1.415	-1.463	-1.325	-1.349	-1.432	-1.393	-0.342	-0.638	-0.78	-0.597	-0.991	-1.043	-1.443	-1.304	down	down	down	down	down	down		down	down	down	down	down	down	down
O02101	swsn-2.2	SWI/SNF chromatin-remodeling accessory subunit 2	0.989	0.747	1.519	1.522	1.492	1.851	0.481	0.587	0.486	0.731	0.424	0.305	1.16	0.902	up	up	up	up	up	up		up	up	up			up	up
Q9XVM0	letm-1	LETM1 (Leucine zipper, EF-hand, TransMembrane mitochondrial protein) homolog	-0.093	-0.146	-0.331	-0.48	-0.37	-0.386	-0.232	-0.125	-0.081	0.044	-0.066	-0.085	-0.23	-0.174			down	down	down	down
A3QMC6	erl-1	Erlin	1.406	1.234	0.979	1.112	1.042	1.082	0.442	0.726	0.868	0.932	1.309	0.941	1.301	1.417	up	up	up	up	up	up		up	up	up	up	up	up	up
Q9XVZ6	CELE_Y54G11A.3	RNA helicase	-1.127	-1.178	-1.298	-1.493	-1.407	-1.431	-0.414	-0.51	-0.692	-0.527	-1.085	-0.729	-1.359	-0.759	down	down	down	down	down	down		down	down	down	down	down	down	down
O61743	B0205.8	Uncharacterized protein	1.107	1.231	0.872	0.842	0.888	0.961	0.411	0.588	0.861	1.031	0.85	0.888	1.216	0.928	up	up	up	up	up	up		up	up	up	up	up	up	up
Q18212	hel-1	Spliceosome RNA helicase DDX39B homolog	-0.902	-1.212	-0.725	-0.746	-0.692	-0.121	-0.495	-0.856	-1.295	-1.022	-1.365	-1.192	-1.139	-1.086	down	down	down	down	down			down	down	down	down	down	down	down
P91223	CELE_F07E5.5	Uncharacterized protein	-1.424	-1.886	-1.553	-1.457	-1.499	-1.428	-0.498	-0.989	-1.204	-1.399	-1.561	-1.385	-1.658	-1.682	down	down	down	down	down	down		down	down	down	down	down	down	down
Q18697	pitr-1	Phosphate transporter	-0.773	-0.854	-0.586	-0.633	-0.61	-0.529	-0.551	-0.767	-0.547	-0.865	-0.382	-0.684	-0.893	-0.831	down	down	down	down	down	down		down	down	down		down	down	down
P34645	ZK512.7	Uncharacterized protein ZK512.7	-1.665	-1.293	-1.645	-1.362	-1.424	-1.061	-0.68	-1.624	-1.691	-1.866	-1.295	-2.03	-1.637	-1.816	down	down	down	down	down	down		down	down	down	down	down	down	down
Q95QR7	C39D10.8	DUF4440 domain-containing protein	-2.679	-2.707	-2.686	-2.721	-3.535	-3.985	-0.882	-1.66	-1.764	-2.327	-1.702	-2.182	-2.598	-2.547	down	down	down	down	down	down		down	down	down	down	down	down	down
G5EFS4	dcs-1	m7GpppX diphosphatase	-1.128	-0.878	-1.121	-1.269	-1.199	-0.864	-0.524	-0.856	-0.943	-0.825	-1.078	-1.093	-1.127	-1.046	down	down	down	down	down	down		down	down	down	down	down	down	down
Q8MYN5	asp-17	Aspartic protease 17	1.054	1.369	0.989	1.392	0.283	0.15	-1.467	-1.098	0.798	0.498	2.07	1.411	1.993	1.621				up							up		up	up
G5EC32	sorb-1	Sorbin and SH3 domain-containing protein 1 homolog	-2.242	-1.976	-1.933	-1.485	-2.012	-1.541	-1.178	-2.178	-2.191	-2.778	-2.01	-2.041	-1.574	-1.882	down	down	down	down	down	down		down	down	down	down	down	down	down
Q9TXR7	CELE_F56B3.11	Mitochondrial import inner membrane translocase subunit Tim21	-1.126	-1.206	-0.885	-0.801	-0.728	-0.888	-0.36	-0.675	-0.89	-0.668	-1.128	-0.885	-1.285	-0.997	down	down	down	down	down	down		down	down	down	down	down	down	down
P30630	lin-9	Protein lin-9	0.728	0.447	1.055	0.948	1.045	1.388	0.386	0.261	0.396	0.294	0.238	0.287	0.7	0.534	up	up	up	up	up	up			up				up	up
Q9N359	csn-4	COP9 signalosome complex subunit 4	0.445	0.513	0.512	0.388	0.575	0.721	0.427	0.448	0.43	0.477	0.454	0.485	0.389	0.48		up	up	up	up	up		up	up	up	up	up		up
Q9XTT3	scav-3	SCAVenger receptor (CD36 family) related	0.172	0.045	-0.339	-0.401	-0.608	-0.221	-0.553	-0.736	-0.311	-0.696	0.065	-0.248	-0.056	0.06					down			down		down
O45143	C34H4.2	Uncharacterized protein	-0.172	-0.291	-0.028	-0.022	0.118	-0.224	-0.903	-0.381	-0.058	-0.064	0.13	-0.56	-0.344	-0.088
P45967	mdmh-35	Uncharacterized protein mdmh-35	-0.517	-0.46	-0.406	-0.636	-0.562	-0.739	-0.409	-0.597	-0.127	-0.499	-0.25	-0.248	-0.419	-0.46	down	down	down	down	down	down		down		down				down
O62234	CELE_F36F2.1	Costars domain-containing protein	-0.308	-0.44	-1.33	-1.433	-1.55	-1.968	-1.105	-1.049	-0.782	-1.056	-0.406	-0.14	0.015	-0.983			down	down	down	down
P41977	sod-3	Superoxide dismutase [Mn] 2, mitochondrial	-0.461	0.057	0.872	1.194	1.03	1.217	-0.771	-0.981	-0.615	-0.133	0.041	-0.133	0.051	-0.206			up	up	up	up		down
Q9U1P7	CELE_Y95D11A.1	39S ribosomal protein L52, mitochondrial	-1.034	-1.532	-0.431	-0.322	-0.498	-0.768	-0.639	-1.043	-0.776	-1.257	-1.001	-0.624	-0.734	-0.726	down	down			down	down		down	down	down	down		down	down
Q17510	rmd-3	Regulator of Microtubule Dynamics	-5.161	-4.71	-4.519	-4.559	-4.486	-3.855	-1.566	-5.368	-5.864	-5.248	-5.592	-4.846	-5.168	-5.167	down	down	down	down	down	down		down	down	down	down	down	down	down
Q9N5N9	CELE_H06I04.3	Putative rRNA methyltransferase	-1.128	-1.381	-1.356	-1.422	-1.286	-1.474	-0.421	-0.771	-1.127	-1.231	-1.34	-1.341	-1.389	-1.377	down	down	down	down	down	down		down	down	down	down	down	down	down
G5EBR7	exo-3	DNA-(apurinic or apyrimidinic site) endonuclease	0.126	-0.227	0.62	0.678	0.478	0.885	0.364	0.064	-0.122	-0.304	-0.095	-0.23	0.232	0.241			up	up	up	up
Q9U1X8	CELE_Y62E10A.24	Ribonuclease P protein subunit p20	-2.749	-2.195	-2.097	-2.071	-2.39	-1.801	-1.704	-2.379	-1.954	-3.074	-2.488	-2.826	-2.919	-2.295	down	down	down	down	down	down		down	down	down	down	down	down	down
P91420	gsp-4	Serine/threonine-protein phosphatase PP1-delta	-5.426	-3.454	-4.016	-3.387	-3.706	-2.82	-1.671	-4.243	-4.149	-2.485	-4.578	-4.037	-4.597	-4.185	down	down	down	down	down	down		down	down	down	down	down	down	down
Q9N362	CELE_Y55F3AM.13	Uncharacterized protein	-0.532	-0.566	-0.534	-0.454	-0.546	-0.607	-0.247	-0.257	-0.286	-0.286	-0.414	-0.463	-0.408	-0.403	down	down	down	down	down	down		down	down	down	down	down	down	down
Q8MPR9	obr-3	PH domain-containing protein	-0.251	-0.415	-0.304	-0.127	-0.044	-0.034	-0.455	-0.527	-0.377	-0.232	-0.368	-0.21	-0.214	-0.47								down
Q18879	cav-2	Caveolin-2	-1.345	-1.088	-2.344	-2.09	-2	-2.314	-1.233	-1.201	-1.181	-1.691	-0.351	-1.692	-0.817	-1.647	down		down	down	down	down				down		down		down
G5EFS2	msi-1	MuSashI (Fly neural) family	-1.417	-1.509	-1.607	-1.662	-1.564	-1.597	-0.341	-0.526	-0.878	-0.81	-0.972	-1.34	-1.342	-1.408	down	down	down	down	down	down		down	down	down	down	down	down	down
G5EGH4	CELE_F49B2.6	Aminopeptidase	0.173	1.161	-0.106	0.233	-0.091	0.719	-1.271	-0.513	-0.632	-0.653	-0.289	-0.431	-0.89	0.058
Q18037	znf-622	C2H2-type domain-containing protein	-0.557	-0.959	-0.494	-0.454	-0.402	-0.571	-0.354	-0.601	-0.788	-0.6	-0.93	-0.824	-0.885	-0.606	down	down	down	down	down	down		down	down	down	down	down	down	down
O62244	myo-6	Myosin motor domain-containing protein	-0.786	-0.675	-0.328	-0.436	-0.389	-0.417	-0.518	-0.788	-0.771	-0.469	-1.022	-0.573	-0.965	-0.636	down	down		down				down	down		down	down	down	down
Q9U2Z1	sec-23	Protein transport protein SEC23	-0.569	-0.621	-0.804	-0.957	-0.814	-0.922	-0.274	-0.264	-0.4	-0.486	-0.401	-0.459	-0.489	-0.675	down	down	down	down	down	down			down	down	down	down	down	down
O01840	pept-3	Peptide transporter 3	0.266	0.122	1.171	1.384	1.317	1.791	-0.857	-0.621	-0.202	-1.122	-0.375	0.312	0.01	0.439			up	up	up	up				down
Q20898	ifet-1	Translational repressor ifet-1	0.27	0.076	0.692	0.693	0.66	0.321	0.424	0.586	0.75	0.744	0.54	0.582	-0.047	0.506			up	up	up			up	up	up	up	up		up
Q20675	CELE_F52E4.5	Uncharacterized protein	-0.2	-0.617	-0.523	-0.639	-0.488	-0.354	-0.624	-0.627	-0.643	-0.219	-0.036	-0.119	-0.23	-0.268			down	down	down			down	down
G5EFF9	eif-2bdelta	Eukaryotic Initiation Factor	-0.39	-0.014	-0.269	-0.242	-0.147	-0.441	-0.362	-0.326	-0.257	-0.154	-0.44	-0.217	-0.213	-0.227						down					down
O45830	ndx-1	Putative nudix hydrolase 1	-1.201	-1.214	-1.723	-1.507	-1.638	-1.227	-0.919	-1.134	-1.323	-1.148	-1.118	-0.924	-1.057	-1.35	down	down	down	down	down	down		down	down	down	down		down	down
Q8IAA2	josd-1	Ubiquitinyl hydrolase 1	-2.836	-3.63	-3.241	-2.735	-3.324	-3.163	-1.595	-2.497	-4.071	-3.162	-2.008	-2.221	-1.935	-3.862	down	down	down	down	down	down		down	down	down	down	down	down	down
Q9XUW5	ddx-17	RNA helicase	-1.384	-1.443	-1.375	-1.368	-1.358	-0.971	-0.322	-0.791	-1.275	-1.564	-1.544	-1.649	-1.251	-1.529	down	down	down	down	down	down		down	down	down	down	down	down	down
G5EFA2	bir-1	Chromosomal passenger complex protein bir-1	1.087	0.582	1.117	1.383	1.077	1.422	0.804	0.625	0.312	-0.03	0.623	0.28	1.072	0.378	up		up	up	up	up							up
D3KFT5	dhs-31	DeHydrogenases, Short chain	1.75	1.685	1.068	0.924	0.611	0.676	1.438	1.889	1.954	0.604	1.704	1.339	1.68	1.362	up	up						up	up		up		up
Q9TY08	syx-16	t-SNARE coiled-coil homology domain-containing protein	-0.633	-0.603	-0.414	-0.33	-0.749	-0.096	-1.009	-0.582	-0.761	-0.194	-0.646	-0.964	-0.3	-0.728
P17169	glmS	Glutamine--fructose-6-phosphate aminotransferase [isomerizing]	0.301	2.394	1.002	1.742	1.193	0.854	-1.346	0.188	0.179	0.318	0.731	0.968	1.12	1.222		up		up	up
Q18257	C27F2.4	Uncharacterized protein	-1.549	-1.89	-1.148	-1.449	-1.158	-1.235	-0.79	-1.402	-1.537	-1.487	-1.791	-1.475	-1.751	-1.589	down	down	down	down	down	down		down	down	down	down	down	down	down
A0A2C9C377	ampd-1	AMP deaminase	-1.827	-1.705	-2.038	-2.194	-2.176	-2.287	-0.342	-0.466	-1.017	-1.07	-1.402	-1.208	-1.611	-1.906	down	down	down	down	down	down		down	down	down	down	down	down	down
Q9GUM7	cpx-1	Putative complexin-1	-0.638	-0.483	-0.568	-0.258	-0.611	-0.364	-0.655	-0.706	-0.627	-0.716	-0.364	-0.202	-0.337	-0.592			down		down			down
Q23359	oma-2	CCCH-type zinc finger protein oma-2	0.962	0.699	1.372	1.533	1.459	1.163	0.609	1.29	1.171	1.208	1.22	0.965	0.937	1.304	up	up	up	up	up	up		up	up	up	up	up	up	up
G5EDB6	ppgn-1	AAA domain-containing protein	-0.186	-0.042	0.054	-0.015	0.017	-0.045	-0.345	-0.39	-0.114	-0.006	-0.149	-0.077	-0.162	-0.07								down
Q21649	CELE_R02F2.7	Uncharacterized protein	-0.453	-0.889	-0.587	-0.638	-0.609	-0.764	-0.42	-0.401	-0.726	-0.852	-0.647	-0.511	-0.727	-0.776		down	down	down	down	down			down	down	down	down	down	down
P34669	ZK686.3	Probable dolichyl-diphosphooligosaccharide--protein glycosyltransferase subunit 3	-0.672	-0.598	-0.938	-1.155	-1.096	-0.917	-0.415	-0.516	-0.632	-0.74	-0.751	-0.582	-0.687	-0.612	down	down	down	down	down	down		down	down	down	down	down	down	down
B4E3X6	spds-1	PABS domain-containing protein	-4.163	-3.736	-5.105	-5.161	-5.112	-4.651	-1.231	-1.942	-2.421	-2.402	-3.696	-3.432	-3.898	-4.8	down	down	down	down	down	down		down	down	down	down	down	down	down
O45757	CELE_T06E6.1	Uncharacterized protein	-1.25	-1.436	-1.231	-1.154	-1.006	-1.319	-0.501	-1.121	-1.328	-1.365	-1.691	-1.27	-1.631	-1.426	down	down	down	down	down	down		down	down	down	down	down	down	down
G5ECC0	klp-16	Kinesin like protein	1.237	1.144	0.747	0.98	0.632	0.542	0.86	0.913	1.2	1.083	1.509	0.872	1.211	1.646	up	up	up	up				up	up	up	up		up	up
Q22585	rund-1	RUN domain-containing protein	-1.678	-0.168	-0.869	-0.394	-1.157	-0.67	-1.389	-0.64	-0.847	-0.003	0.07	0.287	0.026	-0.811	down				down
G5EDI2	ret-1	Reticulon-like protein	-0.171	-0.246	0.076	0.138	0.14	0.139	-0.255	-0.144	-0.176	-0.241	-0.07	-0.174	-0.183	-0.15
Q7YX52	mrpl-53	Mitochondrial Ribosomal Protein, Large	-0.678	-0.766	-0.388	-0.28	-0.349	-0.553	-0.519	-0.511	-0.388	-0.238	-0.956	-0.444	-0.76	-0.524	down	down				down					down		down
H2L0G5	ptc-3	Protein patched homolog 3	-1.023	-1.308	-0.618	-0.505	-0.825	-0.43	-0.824	-0.851	-0.972	-0.876	-0.964	-0.694	-0.81	-1.069	down	down			down			down	down		down			down
Q65ZI4	ttr-49	TransThyretin-Related family domain	1.907	3.14	3.213	2.545	2.354	1.42	1.488	1.467	2.002	2.358	2.716	2.383	2.396	2.426	up	up	up	up	up	up			up	up	up	up	up	up
O01422	csn-2	COP9 signalosome complex subunit 2	0.801	0.701	0.408	0.243	0.5	0.573	0.428	0.663	0.733	0.901	0.685	0.685	0.81	0.862	up	up	up		up	up		up	up	up	up	up	up	up
P30628	unc-32	V-type proton ATPase 116 kDa subunit a 1	-0.207	-0.161	0.142	0.243	0.072	0.206	-0.418	-0.532	-0.648	-0.836	-0.341	-0.46	-0.213	-0.37								down	down	down		down
O02345	nstp-5	Nucleotide Sugar TransPorter family	-1.524	-2.18	-1.257	-1.186	-1.079	-0.973	-0.947	-1.508	-1.858	-2.192	-2.308	-1.63	-2.706	-2.031	down	down	down	down	down	down		down	down	down	down	down	down	down
Q21774	adsl-1	Adenylosuccinate lyase	-1.26	-1.155	-1.259	-1.196	-1.262	-1.176	-0.295	-0.65	-0.952	-0.985	-1.076	-1.189	-1.44	-1.24	down	down	down	down	down	down		down	down	down	down	down	down	down
Q18546	C39E9.12	SAP domain-containing protein	2.057	2.108	2.758	2.803	2.848	3.154	1.106	0.757	0.836	0.06	1.06	1.052	2.528	1.28	up	up	up	up	up	up					up		up	up
Q19391	CELE_F13D11.4	3Beta_HSD domain-containing protein	-0.984	-1.491	-2.394	-3.155	-2.301	-2.817	-1.154	-1.303	-0.721	-0.282	-0.537	-1.459	-0.305	-2.136		down	down	down	down	down		down				down		down
Q9U315	CELE_Y105C5B.5	DUF4440 domain-containing protein	0.047	0.318	-0.215	0.081	-0.589	-0.94	0.919	0.468	0.984	0.315	0.957	0.703	0.365	-0.067						down			up		up
P28635	metQ	D-methionine-binding lipoprotein MetQ	-1.034	1.595	-0.686	1.091	0.297	-0.075	-1.486	-0.816	-0.123	-0.358	0.099	0.185	0.117	-0.604
P52015	cyn-7	Peptidyl-prolyl cis-trans isomerase 7	-0.998	-0.701	-0.406	-0.352	-0.577	-0.361	-0.543	-0.876	-0.996	-1.168	-0.713	-0.925	-1.023	-0.842	down	down			down			down	down	down	down	down	down	down
Q9U2U3	CELE_Y116A8C.27	Uncharacterized protein	-1.275	-1.549	-1.077	-0.979	-0.967	-1.057	-0.432	-0.622	-0.587	-1.23	-0.812	-0.908	-1.28	-1.319	down	down	down	down	down	down		down	down	down	down	down	down	down
G4SLH0	ttn-1	Titin homolog	-0.578	-0.539	-0.687	-0.816	-0.867	-1.117	-0.323	-0.449	-0.455	-0.437	-0.389	-0.374	-0.527	-0.461	down	down	down	down	down	down		down	down	down	down	down	down	down
P07623	metAS	Homoserine O-succinyltransferase	-0.763	1.886	0.81	1.832	1.962	1.817	-1.464	-0.526	0.35	-0.399	0.917	-0.062	0.306	-0.073		up		up	up	up
O45075	CELE_F53H1.4	PHD-type domain-containing protein	1.064	0.881	1.347	1.338	1.213	1.444	0.457	0.428	0.465	0.759	0.601	0.418	0.997	0.979	up	up	up	up	up	up			up	up	up		up	up
O18650	rps-19	40S ribosomal protein S19	-1.451	-2.01	-1.595	-1.577	-1.568	-1.836	-0.461	-0.81	-1.121	-1.22	-1.496	-1.485	-1.652	-1.407	down	down	down	down	down	down		down	down	down	down	down	down	down
Q19948	F32A5.4	Uncharacterized protein F32A5.4	1.599	1.642	3.136	3.157	3.536	3.288	-0.769	-0.797	0.253	-0.192	0.989	0.501	1.144	1.246	up	up	up	up	up	up		down			up		up	up
H2KYQ0	ugt-26	UDP-glucuronosyltransferase	-3.158	-3.193	-3.339	-3.771	-3.864	-3.616	-1.116	-0.757	-1.225	-1.349	-1.942	-2.141	-2.422	-2.939	down	down	down	down	down	down			down	down	down	down	down	down
Q95ZQ4	aak-2	5'-AMP-activated protein kinase catalytic subunit alpha-2	-0.062	-0.098	0.236	0.208	0.236	0.098	-0.353	-0.297	-0.127	-0.141	-0.217	0.171	-0.04	-0.17
O01634	inx-12	Innexin-12	0.091	0.282	0.309	0.468	0.449	0.679	-0.43	-0.468	-0.378	-0.05	-0.255	0.002	-0.131	-0.126				up	up	up		down
Q9N419	nsy-4	Neuronal SYmmetry	-0.666	-1.75	-0.049	-0.034	0.319	0.786	-1.332	-1.916	-1.641	-2.715	-2.165	-1.986	-0.824	-2.089		down						down	down	down	down	down		down
P0AES6	gyrB	DNA gyrase subunit B	0.26	1.44	1.885	1.763	1.974	1.838	-1.002	-0.481	0.725	0.689	0.334	1.284	0.508	1.153		up	up	up	up	up						up		up
Q10651	apl-1	Amyloid-beta-like protein	0.051	0.482	0.581	0.573	0.758	0.623	-0.63	-0.654	-0.316	-0.262	-0.277	-0.637	0.484	-0.113			up	up	up	up		down
Q17846	C09B8.4	Uncharacterized protein	-2.497	-2.331	-1.985	-1.374	-1.854	-2.087	-1.132	-0.838	-1.139	-1.916	-1.627	-1.891	-2.293	-1.213	down	down	down	down	down	down			down	down	down	down	down
Q20173	twf-2	TWinFilin actin binding protein homolog	0.061	0.166	-0.022	0.032	0.035	0.18	-0.429	-0.431	-0.441	-0.693	-0.329	-0.227	-0.078	-0.237									down	down
P91277	hrpk-1	Heterogeneous nuclear ribonucleoprotein K homolog	-0.594	-0.619	-0.539	-0.635	-0.455	-0.37	0.293	-0.012	-0.314	-0.192	-0.697	-0.51	-0.691	-0.641	down	down	down	down	down	down			down		down	down	down	down
Q19048	mrp-3	Uncharacterized protein	0.13	0.431	0.241	0.384	0.418	0.588	-0.461	-0.423	-0.238	0.029	-0.219	0.286	0.113	0.074				up	up	up
G5EBT1	sma-5	Mitogen-activated protein kinase sma-5	-0.97	-0.618	0.342	0.601	1.294	1.324	-1.774	0.068	-1.051	-1.227	-1.333	-1.026	-0.98	0.448
Q9NEX2	gtf-2A2	Transcription initiation factor IIA subunit 2	-0.929	-1.083	-1.987	-1.437	-1.6	-1.5	-1.674	-1.048	-2.324	-2.539	-0.808	-1.631	-0.68	-2.131			down	down	down	down			down	down				down
Q9N574	cyp-31a3	CYtochrome P450 family	0.02	0.947	-0.495	0.915	0.443	-0.448	1.755	2.214	2.46	3.133	1.493	1.942	0.963	1.544								up	up	up		up
H2KYK3	C30G4.4	Uncharacterized protein	-1.624	-1.573	-1.432	-1.549	-1.661	-1.75	-1.039	-1.921	-2.243	-2.154	-1.738	-1.494	-1.487	-1.943	down	down	down	down	down	down		down	down	down	down	down	down	down
Q9XWC3	Y73F4A.2	DOMON domain-containing protein Y73F4A.2	-1.842	-2.169	-1.877	-1.337	-0.827	-1	-2.074	-2.541	-2.306	-3.26	-2.227	-3.08	-3.787	-2.495			down					down	down	down	down	down	down	down
Q9N303	deps-1	P-granule-associated protein deps-1	-0.091	-0.238	-0.534	-0.522	-0.389	-0.24	0.281	0.152	0.199	0.282	-0.096	-0.034	-0.33	0.003			down	down	down	down							down
K8FDY0	hpo-34	Uncharacterized protein	-0.959	-0.428	-0.781	-0.77	-0.888	-0.835	-0.457	-0.354	-0.573	-0.403	-0.775	-0.514	-0.705	-0.723	down		down	down	down	down			down		down	down	down	down
O18239	sec-61.a	Plug_translocon domain-containing protein	-1.78	-1.965	-2.269	-2.259	-1.931	-1.827	-0.498	-0.882	-1.199	-0.958	-1.844	-1.413	-2.017	-1.906	down	down	down	down	down	down		down	down	down	down	down	down	down
Q94261	cif-1	COP9/Signalosome and eIF3 complex-shared subunit 1	-0.904	-0.953	-1.019	-1.057	-0.986	-0.971	-0.307	-0.393	-0.522	-0.392	-0.84	-0.786	-0.899	-0.823	down	down	down	down	down	down		down	down	down	down	down	down	down
A9QY30	C27H6.9	PDDEXK_1 domain-containing protein	0.089	0.31	0.208	-0.016	0.277	0.023	-0.373	-0.364	-0.008	0.12	0.185	0.088	0.022	0.028
Q20932	byn-1	Uncharacterized protein byn-1	-1.494	-1.688	-1.966	-1.989	-1.897	-2.088	-0.442	-0.983	-1.394	-1.366	-1.461	-1.628	-1.619	-1.665	down	down	down	down	down	down		down	down	down	down	down	down	down
Q20100	trpp-4	Trafficking protein particle complex subunit	-0.157	-0.027	0.212	0.138	0.25	0.092	0.328	0.286	0.163	0.3	-0.059	0.077	0.01	-0.063
O44747	CELE_R06A10.4	Protein kinase domain-containing protein	-0.475	0.356	-0.918	-1.863	-0.887	-1.097	-1.843	-0.605	0.184	0.29	-0.545	0.257	0.278	0.136				down
G5ECR8	gba-3	Putative glucosylceramidase 3	1.374	1.286	1.721	1.671	1.871	1.886	-0.467	-0.619	0.166	0.152	0.419	0.768	0.848	0.93	up	up	up	up	up	up		down				up	up	up
Q23158	atn-1	AcTiniN	-0.387	-0.319	-0.68	-0.832	-0.976	-1.242	-0.363	-0.506	-0.443	-0.43	-0.22	-0.195	-0.347	-0.335			down	down	down	down		down	down	down
Q9XVH4	CELE_W02B8.2	Uncharacterized protein	0.124	-0.053	0.164	0.315	0.06	0.515	0.735	0.189	0.398	0.559	-0.364	0.443	0.003	0.194
Q966C6	rpl-7A	60S ribosomal protein L7a	-1.081	-1.726	-1.286	-1.106	-1.232	-1.378	-0.473	-0.688	-0.869	-0.962	-1.294	-1.155	-1.485	-1.113	down	down	down	down	down	down		down	down	down	down	down	down	down
Q8MQ86	ncam-1	NCAM (Neural cell adhesion molecule) homolog	-0.296	-0.113	-0.175	-0.257	-0.089	-0.045	-0.507	-0.652	-0.661	-0.514	-0.631	-0.165	-0.198	-0.339								down	down		down
Q967F1	eif-1	SUI1 domain-containing protein	-0.463	-0.522	-0.454	-0.398	-0.389	-0.36	-0.285	-0.341	-0.298	-0.009	-0.371	-0.505	-0.465	-0.36	down	down	down	down	down	down		down	down		down	down	down	down
O44782	vpr-1	Major sperm protein	0.059	0.268	0.293	0.339	0.311	0.334	-0.24	-0.239	0.023	-0.03	0.117	0.066	0.168	0.149		up	up	up	up	up
Q95Y92	ttr-32	TransThyretin-Related family domain	0.785	0.394	0.222	0.393	0.678	0.256	-0.751	-0.609	-0.46	-0.219	0.313	0.009	1.375	0.668					up								up
A0A1X7RC97	argn-1	ARGiNase Homolog	-0.563	-0.986	-2.585	-2.24	-2.215	-1.764	0.948	0.687	0.671	0.499	0.812	-0.24	-0.455	-1.064			down	down	down	down								down
Q95QN6	brap-2	BRCA1-associated protein homolog 2	0.622	0.687	0.781	0.732	0.627	0.514	0.263	0.366	0.614	0.853	0.793	0.579	0.695	0.768	up	up	up	up	up	up		up	up	up	up	up	up	up
Q19531	CELE_F17H10.2	Uncharacterized protein	2.347	2.592	2.262	2.606	2.379	2.695	0.495	0.95	1.282	1.987	1.666	1.999	2.102	2.368	up	up	up	up	up	up		up	up	up	up	up	up	up
Q9U3I0	rpb-12	RNA Polymerase II (B) subunit	-0.886	-1	-0.836	-0.611	-0.74	-0.846	-0.498	-0.398	-0.533	-0.695	-0.863	-0.857	-0.629	-0.751	down	down	down	down	down	down			down	down	down	down	down	down
P21361	yciG	Uncharacterized protein YciG	-1.983	1.853	-1.534	-0.621	-1.262	-0.708	-2.193	-0.444	-0.036	0.071	1.078	1.164	0.68	-1.15
Q19647	CELE_F20D6.5	CHK domain-containing protein	-2.468	-1.938	-2.211	-2.175	-2.147	-2.241	-0.933	-1.066	-1.596	-2.69	-1.339	-2.058	-1.502	-2.385	down	down	down	down	down	down		down	down	down	down	down	down	down
Q95YE9	clk-2	Telomere length regulation protein clk-2	0.961	0.611	1.114	0.948	1.004	1.231	0.913	0.539	1.513	0.031	0.998	1.114	1.133	1.225			up	up	up	up			up		up	up	up	up
Q9TW65	dys-1	Dystrophin-1	-0.616	-0.707	-0.402	-0.125	-0.269	-0.295	-0.6	-0.77	-0.65	-0.552	-0.949	-0.708	-0.866	-0.542		down						down	down		down	down	down
P34264	mrpl-11	Probable 39S ribosomal protein L11, mitochondrial	-0.716	-1.032	-0.776	-0.895	-0.699	-1.118	-0.413	-0.621	-0.709	-0.74	-0.792	-0.747	-0.826	-0.869	down	down	down	down	down	down		down	down	down	down	down	down	down
G5EEN6	rad-54.l	Uncharacterized protein	-1.01	-0.921	-0.571	-0.477	-0.837	-0.816	-1.131	-1.116	-1.885	-1.2	-1.099	-1.223	-1.49	-0.81									down		down	down	down
P23930	lnt	Apolipoprotein N-acyltransferase	-0.605	0.958	0.794	0.71	0.689	0.423	-0.947	0.202	-0.757	-0.203	0.117	-0.568	-0.374	-0.426
Q9N4I3	CELE_Y71F9AL.9	Uncharacterized protein	-1.81	-1.709	-1.632	-1.694	-1.869	-1.819	-0.283	-0.363	-0.771	-0.79	-1.046	-1.083	-1.563	-1.715	down	down	down	down	down	down		down	down	down	down	down	down	down
O45525	CELE_F45H10.2	Cytochrome b-c1 complex subunit 8	-0.888	-0.863	-1.257	-1.182	-1.308	-1.395	-0.463	-0.702	-0.652	-0.247	-0.369	-0.934	-1.449	-0.905	down	down	down	down	down	down		down	down			down	down	down
O44400	F37C4.5	Protein F37C4.5	0.978	0.988	0.98	0.9	0.893	0.628	0.389	0.815	1.148	1.51	1.551	1.46	1.16	0.864	up	up	up	up	up	up		up	up	up	up	up	up	up
P91457	npp-7	Nuclear Pore complex Protein	0.093	0.112	0.354	0.261	0.242	0.441	0.282	-0.104	-0.085	0.176	0.051	-0.065	0.212	0.205			up	up	up	up
Q9U3M0	C46C2.5	Uncharacterized protein	4.968	5.025	5.574	5.903	5.852	5.698	0.688	1.802	2.92	3.096	4.038	4.208	4.615	4.884	up	up	up	up	up	up		up	up	up	up	up	up	up
H2L0I8	fnip-2	FolliculiN Interacting Protein	1.043	1.195	1.193	1.322	1.187	1.215	0.657	0.4	0.735	0.791	0.397	0.738	1.058	0.968	up	up	up	up	up	up			up	up		up	up	up
D3KFX0	CELE_Y65A5A.2	Uncharacterized protein	1.172	1.298	1.984	2.234	2.256	1.73	0.54	1.09	1.744	1.813	1.813	1.447	1.165	1.968	up	up	up	up	up	up		up	up	up	up	up	up	up
O01811	mec-6	Mechanosensory abnormality protein 6	-0.47	0.051	-1.807	-1.888	-1.37	-1.622	-1.383	-1.019	-0.416	-1.432	0.388	-0.812	0.396	-0.752			down	down	down	down
P34541	R05D3.8	Putative RNA-binding protein R05D3.8	0.726	0.915	0.91	1.245	0.951	1.323	1.118	0.639	0.424	0.608	0.233	0.619	0.99	0.574				up	up	up
Q9U275	haf-7	HAlF transporter (PGP related)	-0.379	-0.391	0.082	0.292	0.37	-0.245	-0.56	-0.459	0.169	0.078	-0.304	-0.095	0.174	-0.102
Q20950	cpr-9	Pept_C1 domain-containing protein	-1.872	-1.063	-1.513	-1.561	-1.841	-1.748	0.819	0.962	0.564	0.764	0.157	-0.285	-0.787	-1.12	down	down	down	down	down	down		up						down
Q19973	cec-5	Chromo domain-containing protein	-0.055	-0.478	0.213	0.238	0.368	0.771	-0.54	-0.881	-1.138	-1.467	-1.061	-1.134	-0.104	-0.659						up		down	down	down	down	down		down
Q95Y35	CELE_Y108G3AL.2	Pre-mRNA-splicing factor 38	0.459	0.075	0.799	0.59	0.702	0.8	0.371	0.069	0.065	0.174	0.134	0.067	0.493	0.333	up		up	up	up	up							up
Q17967	pdi-1	Protein disulfide-isomerase 1	-0.272	-0.476	-0.685	-0.643	-0.916	-0.728	-0.351	-0.344	-0.423	-0.331	-0.186	-0.469	-0.111	-0.405		down	down	down	down	down			down			down		down
Q20364	sly-1	SLY1 homolog	-0.204	-0.321	-0.306	-0.242	-0.219	-0.147	-0.229	-0.309	-0.32	-0.374	-0.13	-0.37	-0.282	-0.254		down	down	down	down			down	down	down		down	down
Q9TYX1	dpf-5	Acylaminoacyl-peptidase	0.21	0.207	0.281	0.336	0.344	0.403	0.29	0.207	0.148	0.245	0.283	0.111	0.189	0.122			up	up	up	up					up
Q966L9	glh-2	ATP-dependent RNA helicase glh-2	-0.045	-0.382	-0.544	-0.747	-0.537	-0.539	0.463	0.38	0.249	0.013	0.141	0.066	-0.189	0.04			down	down	down	down
O45865	ant-1.1	ADP/ATP translocase	-1.678	-1.924	-1.274	-1.344	-1.284	-1.243	-0.657	-0.953	-1.202	-0.759	-1.604	-1.133	-1.833	-1.738	down	down	down	down	down	down		down	down	down	down	down	down	down
G5ECL1	CELE_M05D6.2	Uncharacterized protein	0.574	0.418	1.175	1.157	1.155	1.309	0.452	0.27	0.026	0.406	0.106	0.263	0.449	0.455	up		up	up	up	up
G5EG67	tag-10	Uncharacterized protein	1.309	1.829	2.143	2.223	1.992	2.135	-1.009	-2.131	-1.177	-0.049	-0.543	0.918	1.018	1.356	up	up	up	up	up	up		down	down					up
P30632	asna-1	ATPase asna-1	-1.479	-1.635	-1.304	-1.087	-1.236	-0.957	-0.568	-0.985	-1.592	-2.369	-1.453	-1.673	-1.535	-1.755	down	down	down	down	down	down		down	down	down	down	down	down	down
A3QM97	cnnm-1	Metal transporter cnnm-1	-0.93	-0.796	-0.628	-0.981	-0.53	-0.551	-0.548	-0.608	-0.884	-0.824	-0.862	-0.591	-0.925	-0.785	down	down	down	down	down	down		down	down	down	down	down	down	down
Q22054	rps-16	40S ribosomal protein S16	-1.188	-1.418	-1.159	-0.996	-1.113	-1.205	-0.358	-0.698	-0.929	-1.16	-1.114	-1.223	-1.396	-1.193	down	down	down	down	down	down		down	down	down	down	down	down	down
Q9XW12	Y18D10A.9	Probable cytosolic iron-sulfur protein assembly protein CIAO1 homolog	-0.827	-1.11	-0.747	-0.626	-0.839	-0.738	-0.333	-0.654	-0.618	-0.715	-0.796	-0.709	-1.066	-0.837	down	down	down	down	down	down		down	down	down	down	down	down	down
Q9TYR0	CELE_H04M03.3	Uncharacterized protein	1.567	1.46	1.584	1.624	1.713	1.475	0.443	0.701	1.081	1.416	1.348	1.328	1.534	1.647	up	up	up	up	up	up		up	up	up	up	up	up	up
Q20720	CELE_F53F4.11	Uncharacterized protein	-1.565	-1.833	-1.962	-1.922	-1.89	-2.056	-0.453	-0.825	-1.338	-1.214	-1.549	-1.516	-1.745	-1.813	down	down	down	down	down	down		down	down	down	down	down	down	down
Q22135	nifk-1	RRM domain-containing protein	-1.236	-1.568	-1.774	-1.647	-1.741	-1.745	-0.545	-1.141	-1.368	-1.363	-1.572	-1.433	-1.611	-1.388	down	down	down	down	down	down		down	down	down	down	down	down	down
Q22763	nep-22	NEPrilysin metallopeptidase family	-2.52	-2.288	-2.008	-2.119	-1.475	-1.877	-0.871	-1.267	-1.829	-1.663	-2.689	-2.066	-2.471	-2.745	down	down	down	down	down	down		down	down	down	down	down	down	down
Q03601	nhl-1	RING finger protein nhl-1	-0.313	-0.078	-0.293	-0.292	-0.193	-0.243	-0.59	-0.377	-0.395	-0.903	-0.43	-0.056	-0.202	-0.558										down
Q9U2M1	dpy-28	Condensin complex subunit 1	0.715	0.735	1.082	1.127	1.212	1.405	0.419	0.218	-0.019	-0.123	0.092	0.253	0.963	0.73	up	up	up	up	up	up							up	up
G5ECA0	mpst-6	MercaptoPyruvate SulfurTransferase homolog	-2.441	-3.233	-2.391	-2.076	-1.808	-1.491	-1.37	-3.834	-3.174	-3.192	-3.917	-3.051	-2.986	-2.893	down	down	down	down	down	down		down	down	down	down	down	down	down
Q8I136	gly-4	Polypeptide N-acetylgalactosaminyltransferase 4	-0.771	-0.95	-1.264	-1.375	-1.328	-1.362	-0.361	-0.186	-0.318	-0.142	-0.427	-0.541	-0.585	-0.926	down	down	down	down	down	down					down	down	down	down
P75874	yccU	Uncharacterized protein YccU	-0.577	3.231	0.116	0.97	0.087	-0.495	-2.438	0.109	0.45	-0.183	1.138	1.603	1.55	-0.603		up
P55155	vit-1	Vitellogenin-1	-0.373	0.004	-0.012	-0.003	0.232	0.034	-0.791	-0.516	-0.371	-0.471	-0.662	-0.05	-0.795	-0.314
Q9N4P2	glrx-21	Glutaredoxin domain-containing protein	-1.757	-2.154	-2.594	-2.331	-2.439	-1.841	-1.101	-1.645	-2.134	-1.844	-1.868	-2.148	-2.08	-2.504	down	down	down	down	down	down		down	down	down	down	down	down	down
Q22171	CELE_T04G9.4	L-aminoadipate-semialdehyde dehydrogenase-phosphopantetheinyl transferase	-0.598	-0.659	-0.938	-1.015	-0.988	-0.848	-0.496	-0.656	-0.159	-0.621	-0.635	-0.152	-0.484	-0.933	down	down	down	down	down	down		down		down	down			down
Q18237	smc-5	Structural maintenance of chromosomes protein 5	0.203	0.128	0.428	0.548	0.53	0.568	0.259	0.107	0.26	0.101	0.232	0.029	-0.007	0.197			up	up	up	up			up
O44185	flp-13	FMRFamide-like neuropeptides 13	-0.982	-0.435	-1.391	-0.977	-1.584	-0.999	-1.516	-0.359	-0.858	-1.232	-1.479	-0.993	-0.359	-0.24			down		down						down
Q21346	cul-6	Cullin-6	-0.735	-0.529	0.112	0.406	0.565	0.092	-1.122	-1.077	-0.997	-0.037	-0.882	-0.696	-0.783	0.165
P91093	coq-1	COenzyme Q (Ubiquinone) biosynthesis	-0.994	-1.285	-0.803	-0.864	-0.69	-1.1	0.74	0.798	0.864	0.687	0.128	0.143	-0.352	-0.872	down	down	down	down	down	down		up	up					down
P76341	hiuH	5-hydroxyisourate hydrolase	-2.389	1.107	-0.711	-0.735	-0.968	-0.152	-1.862	-1.61	-2.115	-2.37	0.244	-0.793	0.072	-1.902	down								down	down
P91302	ubl-5	Ubiquitin-like protein 5	-1.753	-2.315	-0.752	0.044	-0.398	0.216	-1.316	-1.961	-1.89	-0.214	-2.262	-1.428	-2.402	-1.529	down	down						down	down		down	down	down	down
Q8MXS1	rab-18	Ras-related protein Rab-18	-1.11	-1.289	-1.203	-0.984	-1.032	-0.619	-0.724	-1.252	-1.479	-1.698	-1.356	-1.009	-1.458	-1.444	down	down	down	down	down	down		down	down	down	down	down	down	down
P37194	slp	Outer membrane protein Slp	-0.793	1.878	0.06	1.024	0.213	-0.095	-1.675	-0.502	-0.656	-0.556	0.078	-0.072	0.475	-0.969		up
Q9N390	gtf-2H5	General transcription and DNA repair factor IIH subunit TFB5	0.313	0.096	0.229	0.24	0.161	0.402	0.478	0.293	0.355	0.527	0.482	0.291	0.486	-0.034											up
Q9N4J8	cct-3	T-complex protein 1 subunit gamma	-1.011	-1.186	-1.207	-1.075	-1.29	-1.072	-0.326	-0.574	-0.82	-0.877	-0.946	-1.119	-1.047	-0.94	down	down	down	down	down	down		down	down	down	down	down	down	down
Q18994	eif-2bepsilon	eIF-2B GDP-GTP exchange factor subunit epsilon	-0.376	-0.455	-0.264	-0.15	-0.187	-0.216	-0.235	-0.386	-0.406	-0.199	-0.447	-0.379	-0.473	-0.305	down	down	down			down		down	down		down	down	down	down
Q6A575	mrpl-21	Mitochondrial Ribosomal Protein, Large	-1.05	-1.203	-1.219	-1.272	-0.983	-1.348	-0.475	-0.546	-0.562	-0.547	-0.673	-0.856	-1.009	-0.969	down	down	down	down	down	down		down	down	down	down	down	down	down
P25526	gabD	Succinate-semialdehyde dehydrogenase [NADP(+)] GabD	0.631	2.208	-0.367	2.174	0.831	1.059	-2.607	0.094	0.822	0.446	0.801	1.414	1.078	0.726
Q9BL81	CELE_Y47G6A.21	Uncharacterized protein	-1.973	-2.369	-2.524	-2.385	-2.41	-2.213	-0.405	-0.751	-1.296	-1.291	-1.559	-1.898	-1.951	-2.162	down	down	down	down	down	down		down	down	down	down	down	down	down
Q7YXB7	CELE_M01F1.8	Uncharacterized protein	-0.101	0.09	0.014	-0.081	-0.082	-0.085	0.5	0.808	0.924	0.972	0.601	0.314	-0.065	0.352								up	up	up	up
O02334	pri-2	DNA primase large subunit	0.818	0.459	1.002	1.07	0.962	1.253	0.423	0.442	0.348	0.67	0.326	0.378	0.715	0.731	up		up	up	up	up				up			up	up
Q09497	rsu-1	Ras SUppressor homolog	-0.351	-0.425	-0.251	-0.025	-0.265	-0.009	-0.367	-0.572	-0.7	-0.595	-0.487	-0.328	-0.477	-0.734		down						down	down	down	down		down	down
Q9GZH2	ruvb-2	RuvB-like 2	-0.561	-0.621	-0.63	-0.618	-0.704	-0.335	-0.327	-0.659	-0.812	-0.552	-0.758	-0.849	-0.665	-0.633	down	down	down	down	down	down		down	down	down	down	down	down	down
Q22100	kat-1	Acetyl-CoA acetyltransferase homolog, mitochondrial	-0.475	-0.646	-0.606	-0.75	-0.766	-0.872	0.344	0.474	0.433	0.668	0.315	0.156	-0.313	-0.203	down	down	down	down	down	down		up	up	up
Q20588	F49C12.11	Translation machinery-associated protein 7 homolog	-0.217	-0.632	-0.586	-0.518	-0.597	-0.522	-0.345	-0.369	-0.162	-0.05	-0.409	-0.346	-0.496	-0.256		down	down	down	down	down		down			down		down
H2FLL7	CELE_T10C6.6	MFS domain-containing protein	1.712	1.609	3.026	3.168	2.559	2.521	1.434	1.77	1.677	1.224	1.61	2.387	1.636	1.84	up	up	up	up	up	up		up	up		up	up	up	up
Q19103	skih-2	SKI (Yeast SuperKIller) Helicase homolog	-0.718	-0.651	-0.776	-0.717	-0.69	-0.728	-0.225	-0.33	-0.522	-0.422	-0.557	-0.564	-0.781	-0.543	down	down	down	down	down	down		down	down	down	down	down	down	down
Q8I4K2	CELE_F32D8.12	FAD-binding PCMH-type domain-containing protein	-0.827	-0.611	-1.107	-1.277	-1.208	-1.256	0.503	0.694	0.516	0.556	0.236	0.308	-0.421	-0.618	down	down	down	down	down	down		up	up					down
O02209	tads-1	Replication termination factor 2	-0.381	-1.225	-1.286	-1.041	-1.742	-1.091	-1.419	-0.474	-1.664	0.007	-1.004	-0.394	-0.742	-0.617			down		down				down
O02365	mua-6	Intermediate filament protein ifa-2	0.445	0.453	0.749	0.838	0.673	0.94	-0.288	-0.273	-0.275	-0.351	0.038	0.189	0.135	0.15	up	up	up	up	up	up				down
Q629J5	R144.12	Uncharacterized protein R144.12	-0.404	-0.345	-0.9	-1.145	-0.84	-1.083	-0.446	-0.435	-0.795	-0.603	-0.528	-0.638	-0.696	-0.506			down	down	down	down			down	down	down	down	down
P76052	abgB	p-aminobenzoyl-glutamate hydrolase subunit B	0.334	3.824	1.503	1.431	1.603	1.996	-1.598	0.286	1.22	0.498	1.817	2.187	2.717	0.354		up	up	up	up	up					up	up	up
Q17540	C01B10.9	Bis(5'-adenosyl)-triphosphatase	-0.312	-1.47	1.607	1.421	1.169	1.342	-1.186	-1.047	-0.375	-1.613	-0.984	0.053	0.091	-0.756		down	up	up	up	up				down
Q93718	CELE_F43G9.4	Uncharacterized protein	0.662	0.382	1.1	1.094	0.933	1.186	0.434	0.42	0.578	0.631	0.667	0.249	0.982	0.868	up		up	up	up	up			up	up	up		up	up
P54002	algn-9	Alpha-1,2-mannosyltransferase algn-9	-0.117	0.037	-0.006	0.078	0.247	0.092	-0.438	-0.191	-0.053	-0.064	-0.209	0.101	0.008	-0.011
Q9XVQ2	timm-23	Translocase, Inner Mitochondrial Membrane	-2.266	-1.988	-2.444	-2.308	-2.11	-2.358	-0.835	-1.791	-1.801	-1.864	-1.992	-1.865	-2.481	-2.803	down	down	down	down	down	down		down	down	down	down	down	down	down
O17983	arrd-14	Arrestin_C domain-containing protein	0.268	0.863	0.086	0.32	0.283	0.507	-0.409	-0.461	-0.426	-0.366	0.012	-0.001	0.019	-0.039		up				up		down	down
O01504	C37A2.7	60S acidic ribosomal protein P2	-2.487	-2.378	-1.373	-1.38	-1.55	-1.487	-0.454	-1.257	-1.695	-2.179	-1.982	-1.996	-1.942	-1.96	down	down	down	down	down	down		down	down	down	down	down	down	down
G5EC63	ttm-5	Putative sphingolipid delta(4)-desaturase/C4-monooxygenase	-2.043	-1.042	-1.574	-1.637	-1.748	-1.452	-1.049	-1.197	-1.717	-1.763	-2.082	-2.019	-1.191	-1.88	down		down	down	down	down		down	down	down	down	down	down	down
Q21171	CELE_K03B4.4	Uncharacterized protein	-1.918	-1.061	-3.181	-2.624	-2.829	-2.026	-1.993	-1.955	-1.999	-3.097	-1.557	-2.695	-3.978	-3.846			down	down	down	down				down		down	down	down
Q17571	aqp-2	AQuaPorin or aquaglyceroporin related	0.328	-0.126	-0.262	0.381	0.636	1.189	-0.987	-1.187	-1.309	-0.931	-0.781	-0.788	0.018	-0.278						up		down	down
H2KYV3	C18B2.5	Uncharacterized protein	-0.931	-0.609	-0.94	-0.911	-1.029	-0.928	-0.479	-0.715	-0.705	-0.851	-0.521	-0.621	-0.652	-0.843	down	down	down	down	down	down		down	down	down	down	down	down	down
Q20798	sel-11	E3 ubiquitin-protein ligase hrd-1	-1.53	-1.581	-1.985	-1.283	-1.303	-0.975	-1.154	-1.381	-1.588	-2.187	-1.753	-1.753	-0.873	-1.134	down	down	down	down	down			down	down	down	down	down
Q18032	C15H9.9	Uncharacterized protein	-1.687	-1.699	-2.136	-2.403	-2.356	-2.277	-1.001	-1.21	-1.625	-1.931	-1.063	-1.449	-1.354	-1.891	down	down	down	down	down	down		down	down	down	down	down	down	down
Q93544	CELE_F20G2.1	Uncharacterized protein	-2.062	-1.26	-2.982	-3.067	-2.712	-2.156	-1.521	-1.568	-2.327	-2	-0.687	-1.684	-1.721	-2.267	down		down	down	down	down			down	down		down	down	down
Q18316	rars-2	Arginine--tRNA ligase	-0.907	-0.316	-1.164	-1.116	-1.328	-1.161	-1.136	-1.138	-0.614	-0.216	-0.308	-0.26	-0.25	-0.279			down	down	down	down
Q17558	gtf-2f1	Transcription initiation factor IIF subunit alpha	-0.178	-0.395	0.284	0.163	0.26	0.408	-0.321	-0.665	-0.726	-0.79	-0.585	-0.56	-0.512	-0.405		down	up			up		down	down	down	down	down	down	down
H2L0C0	emc-1	ER membrane protein complex subunit 1	-0.496	-0.553	-0.541	-0.499	-0.417	-0.408	-0.221	-0.2	-0.203	-0.068	-0.519	-0.477	-0.391	-0.521	down	down	down	down	down	down					down	down	down	down
G5EF57	CELE_Y106G6A.4	Uncharacterized protein	-2.042	-2.1	-1.385	-1.118	-1.393	-0.918	-1.296	-2.293	-2.607	-2.07	-2.331	-2.445	-2.522	-2.007	down	down	down	down	down			down	down	down	down	down	down	down
Q17971	C14C10.5	Uncharacterized protein	0.002	0.02	0.124	0.142	0.119	0.124	0.288	0.08	0.079	0.18	0.045	-0.204	0.091	0.094
P34428	mdt-30	Glutamine/asparagine-rich protein mdt-30	0.933	0.529	1.078	1.135	1.166	1.098	0.398	0.54	0.73	0.998	0.813	0.538	0.863	1.093	up	up	up	up	up	up		up	up	up	up	up	up	up
P91390	ostd-1	Dolichyl-diphosphooligosaccharide--protein glycosyltransferase subunit 2	-1.166	-1.207	-1.58	-1.377	-1.643	-1.23	-0.553	-0.659	-1.157	-0.761	-1.186	-1.177	-1.39	-1.251	down	down	down	down	down	down		down	down	down	down	down	down	down
H2L0Q1	CELE_ZK6.11	Uncharacterized protein	-2.002	-1.821	-2.487	-2.503	-2.432	-2.914	-0.65	-0.453	-0.535	-0.193	-1.11	-1.322	-1.058	-1.368	down	down	down	down	down	down					down	down	down	down
P91308	CELE_F46F11.8	Uncharacterized protein	0.331	0.708	0.529	0.424	0.262	-0.172	0.967	0.945	0.786	1.258	0.578	0.896	0.341	0.682										up
Q09994	ani-2	Anillin-like protein 2	0.002	-0.016	-0.476	-0.692	-0.477	-0.89	0.471	0.36	0.579	0.647	0.232	0.344	-0.257	0.328			down	down	down	down			up	up
O44873	tbc-10	Rab-GAP TBC domain-containing protein	0.925	1.497	0.691	0.562	0.801	0.832	-0.538	0.013	0.446	0.642	0.608	0.556	0.747	1.031	up	up	up	up	up	up				up	up		up	up
Q5FC47	C55A6.12	DUF1794 domain-containing protein	-1.989	-1.744	-2.105	-2.1	-2.138	-2.05	-0.398	-0.766	-1.329	-1.266	-1.336	-1.797	-1.578	-2.095	down	down	down	down	down	down		down	down	down	down	down	down	down
P91038	ugt-28	Glucuronosyltransferase	-0.443	-0.557	-0.266	-0.287	-0.146	-0.313	-0.363	-0.015	0.208	0.273	-0.038	-0.192	-0.218	-0.361	down	down
O45734	cpl-1	Cathepsin L-like	0.231	0.213	0.148	0.152	-0.006	-0.304	-0.449	-0.497	0.161	-0.185	0.167	0.157	-0.032	0.435								down
G5ECB9	mex-1	MEX-1	0.183	0.229	0.515	0.593	0.64	0.082	0.569	1.048	1.216	1.065	1.05	0.634	0.348	0.767			up	up	up			up	up	up	up	up		up
P0AGE0	ssb	Single-stranded DNA-binding protein	-0.863	2.027	-1.392	-0.277	-0.833	-1.017	-2.389	-0.71	-0.43	-1.574	0.267	0.123	0.872	-1.575
P34885	pkc-1	Protein kinase C-like 1B	-0.957	-0.596	-0.37	-0.727	-0.284	-0.342	-0.654	-0.802	-0.711	-0.536	-1.045	-0.66	-1.022	-0.414	down			down				down	down		down		down
O61861	arx-7	Actin-related protein 2/3 complex subunit 5	0.441	0.26	0.542	0.62	0.77	0.542	0.361	0.378	0.483	0.287	0.199	0.097	0.078	0.36	up		up	up	up	up			up
G5EDL4	CELE_R05H10.3	Uncharacterized protein	0.187	0.086	0.213	0.315	0.458	0.519	0.567	0.363	0.285	0.234	0.235	-0.264	0.389	0.472						up
Q95Y73	fusm-2	Mitochondrial elongation factor G2	-0.345	-0.412	-0.095	-0.032	-0.137	-0.03	-0.403	-0.425	-0.208	0.069	-0.345	-0.07	-0.475	-0.328													down
O17607	ruvb-1	RuvB-like 1	-0.498	-0.591	-0.271	-0.164	-0.238	-0.027	-0.26	-0.508	-0.648	-0.669	-0.804	-0.837	-0.541	-0.468	down	down	down		down			down	down	down	down	down	down	down
O02075	CELE_F19B10.10	Uncharacterized protein	0.698	0.784	1.232	1.226	1.241	1.066	0.503	0.78	0.925	1.323	0.889	0.788	0.823	1.114	up	up	up	up	up	up		up	up	up	up	up	up	up
O01963	ari-1.3	RBR-type E3 ubiquitin transferase	0.769	1.086	1.135	1.236	1.076	1.311	-0.858	-0.546	-0.347	0.266	0.235	1.184	0.582	0.707		up	up	up	up	up						up
O16274	CELE_F39G3.3	Uncharacterized protein	4.07	3.566	3.682	2.972	2.285	1.982	1.879	4.264	3.848	4.294	3.763	3.816	3.761	3.907	up	up	up	up	up	up		up	up	up	up	up	up	up
Q9XUB2	mex-5	Zinc finger protein mex-5	0.728	0.346	1.068	1.335	1.084	0.519	0.579	1.133	1.473	1.321	1.332	0.808	0.735	1.126	up		up	up	up	up		up	up	up	up	up	up	up
Q95ZK7	gld-3	Defective in germ line development protein 3	0.474	0.375	0.955	1.12	0.955	0.554	0.464	0.801	0.957	0.997	0.847	0.737	0.657	0.875			up	up	up	up		up	up	up	up	up	up	up
Q9GYT4	arrd-19	Arrestin_C domain-containing protein	-1.891	-0.684	-0.501	-0.677	-0.455	-0.868	-1.173	-1.373	-1.486	-0.562	-1.551	-0.808	-1.882	-1.581	down							down	down		down		down	down
Q09417	R06F6.8	Guanine nucleotide exchange factor subunit R06F6.8	-2.154	-2.019	-2.076	-1.784	-1.83	-1.385	-1.114	-2.41	-2.419	-2.063	-2.082	-1.919	-2.682	-1.846	down	down	down	down	down	down		down	down	down	down	down	down	down
Q9XW16	pfn-1	Profilin-1	0.801	0.787	0.708	0.788	0.777	0.761	0.378	0.299	0.43	0.247	0.644	0.494	0.623	0.753	up	up	up	up	up	up			up		up	up	up	up
Q9U1R9	CELE_Y79H2A.2	Uncharacterized protein	-1.551	-2.141	-2.573	-2.629	-2.534	-2.26	-2.459	-1.583	-3.854	-3.21	-3.268	-2.339	0.884	-2.393			down	down	down	down			down	down	down
Q03569	gpr-2	G-protein regulator 2	1.767	2.329	1.902	1.837	2.18	1.85	1.14	1.623	1.974	1.605	2.251	1.901	2.332	1.696	up	up	up	up	up	up		up	up	up	up	up	up	up
Q9GYU3;Q9TXS4	CELE_F35F10.5	Uncharacterized protein	-0.483	-0.065	-0.417	-0.334	-0.735	-0.573	-0.919	-1.012	-1.019	-0.949	-0.315	-0.515	-0.619	-0.876								down	down
P21865	kdpD	Sensor protein KdpD	-1.061	-0.363	-0.147	-0.27	0.234	0.219	-0.957	-0.4	-0.665	-0.935	-1.136	-0.576	-0.833	-0.412											down
Q9XWC2	Y73F4A.1	DOMON domain-containing protein Y73F4A.1	0.234	0.046	0.807	0.929	0.751	0.758	-1.108	-1.536	-1.531	-0.885	-0.317	0.158	-0.062	-0.203								down	down
P34693	snt-1	Synaptotagmin-1	-0.322	-0.499	-0.002	0.036	0.283	0.201	-0.558	-0.737	-0.491	-0.343	-0.453	-0.371	-0.405	-0.505								down
G5EFM7	CELE_F18C12.3	Serum response factor-binding protein 1	-0.754	-1.072	-0.965	-0.835	-0.739	-0.75	-0.395	-0.698	-0.95	-0.838	-0.85	-0.955	-1.077	-0.887	down	down	down	down	down	down		down	down	down	down	down	down	down
Q09486	C30G12.2	Uncharacterized protein	-2.892	-0.937	-3.629	-4.376	-3.759	-4.519	-2.147	-0.687	-0.888	-0.273	-1.62	-0.497	-2.296	-3.419	down		down	down	down	down								down
Q17680	CELE_F33C8.4	Uncharacterized protein	-2.15	-1.196	-2.439	-2.031	-2.202	-1.996	-0.833	-1.057	-0.922	-0.717	-0.895	-0.61	-1.287	-1.533	down	down	down	down	down	down		down	down		down		down	down
Q8MQ99	C51E3.9	Uncharacterized protein	-0.557	0.038	-0.052	-0.106	0.045	-0.109	-0.385	-0.558	-0.635	-0.544	-0.32	-0.461	-0.372	-0.421	down							down	down	down		down
Q27464	gspd-1	Glucose-6-phosphate 1-dehydrogenase	-0.928	-0.727	-1.058	-1.001	-0.936	-0.963	-0.304	-0.592	-0.992	-1.046	-0.871	-0.826	-1.152	-1.252	down	down	down	down	down	down		down	down	down	down	down	down	down
P55954	cox-5A	Cytochrome c oxidase subunit 5A, mitochondrial	-0.539	-0.409	-0.737	-0.757	-0.634	-0.89	-0.306	-0.126	-0.181	0.205	-0.355	-0.254	-0.507	-0.514	down	down	down	down	down	down					down		down	down
O45391	cth-1	Cystathionine gamma-lyase	-2.552	-2.562	-4.206	-3.42	-3.973	-4.181	-0.969	-1.372	-1.409	-1.094	-1.358	-1.631	-2.246	-2.823	down	down	down	down	down	down		down	down		down	down	down	down
O44497	lgc-22	ShKT domain-containing protein	0.864	1.049	-0.692	0.159	-0.362	-0.284	1.159	1.459	1.855	1.752	2.061	1.787	1.051	0.416								up	up	up	up	up
Q9NAC1	CELE_Y53F4B.9	Uncharacterized protein	0.459	0.697	0.928	1.102	0.731	0.614	0.542	0.317	0.447	0.712	0.799	0.569	0.827	0.965		up	up	up	up	up				up	up		up	up
A0A5S9MND1	wac-1.1	WW domain-containing protein	1.201	1.122	0.954	1.042	0.675	1.422	1.595	1.193	0.805	-0.41	0.638	-0.097	1.201	0.301						up
Q93791	nid-1	NIDogen (Basement membrane protein)	-0.635	-0.518	-0.642	-0.637	-0.456	-0.558	-0.44	-0.49	-0.569	-0.41	-0.551	-0.418	-0.64	-0.597	down	down	down	down	down	down		down	down		down		down	down
Q18688	daf-21	Heat shock protein 90	-0.513	-0.622	-0.134	-0.131	-0.234	-0.218	0.225	0.208	0.007	-0.065	-0.238	-0.307	-0.42	-0.277	down	down			down	down					down	down	down	down
Q19326	unc-85	Probable histone chaperone asf-1	1.195	1.032	1.393	1.35	1.235	1.389	0.46	0.609	0.692	0.754	0.781	0.614	1.079	1.041	up	up	up	up	up	up		up	up	up	up	up	up	up
Q95ZT6	CELE_F43H9.4	Glycine N-acyltransferase-like protein	1.253	1.442	0.634	0.249	1.199	0.891	0.853	1.153	1.224	1.644	1.684	1.547	1.278	1.033	up	up			up	up		up	up	up	up	up	up	up
Q8WQA8	rps-20	40S ribosomal protein S20	-1.304	-1.31	-1.131	-1.152	-1.137	-1.232	-0.321	-0.521	-0.67	-0.522	-1.122	-1.189	-1.233	-1.057	down	down	down	down	down	down		down	down	down	down	down	down	down
Q9XUV0	pbs-5	Proteasome subunit pbs-5	-1.259	-1.334	-1.369	-1.199	-1.282	-1.157	-0.355	-0.717	-0.968	-1.032	-1.111	-1.31	-1.289	-1.317	down	down	down	down	down	down		down	down	down	down	down	down	down
Q9N3H3	nduf-9	NmrA domain-containing protein	-0.889	-0.999	-1.633	-1.6	-1.463	-1.598	-0.32	-0.411	-0.485	-0.278	-0.738	-0.672	-0.937	-0.945	down	down	down	down	down	down		down	down		down	down	down	down
Q9N593	mat-1	Cell division cycle protein 27 homolog	0.943	0.684	1.242	1.299	1.315	1.285	0.437	0.684	0.754	0.861	0.623	0.627	1.086	1.176	up	up	up	up	up	up		up	up	up	up	up	up	up
Q22749	CELE_T24G10.2	SWIB domain-containing protein	0.456	0.312	0.178	-0.065	0.176	0.446	0.379	0.411	0.234	0.225	0.293	0.168	0.71	0.165	up					up		up					up
P46012	C01G6.5	Uncharacterized protein C01G6.5	1.181	0.973	1.693	1.731	1.695	2.079	0.605	-0.062	0.182	-0.154	0.326	0.795	1.363	0.542	up	up	up	up	up	up						up	up
P0A7Y8	rnpA	Ribonuclease P protein component	-1.168	1.683	0.516	0.133	0.026	0.237	-1.221	-0.34	-0.017	-0.578	0.57	-0.213	-0.1	-0.709		up
Q9GZI0	CELE_F52G3.1	BAT2_N domain-containing protein	-0.817	-0.268	-1.281	-0.856	-1.346	-0.973	-1.012	-0.443	-1.083	-1.979	-0.571	-1.665	-0.813	-0.813			down		down	down			down	down		down
Q20728	tbcb-1	Tubulin-specific chaperone B	0.71	0.356	0.511	0.655	0.542	0.607	0.278	0.406	0.562	0.458	0.637	0.285	0.539	0.614	up	up	up	up	up	up		up	up	up	up		up	up
Q22013	CELE_R186.3	Signal recognition particle receptor subunit beta	-0.854	-0.976	-0.697	-0.892	-0.774	-0.772	-0.297	-0.435	-0.648	-0.741	-0.608	-0.993	-0.779	-0.86	down	down	down	down	down	down		down	down	down	down	down	down	down
A7WK41	CELE_Y94H6A.7	Low molecular weight phosphotyrosine protein phosphatase	-1.138	-0.878	-1.506	-1.483	-1.703	-1.263	-0.725	-1.094	-0.727	-0.941	-0.754	-0.836	-0.952	-0.864	down	down	down	down	down	down		down		down	down	down	down	down
O62258	CELE_F53F8.5	SAM domain-containing protein	-0.417	-0.502	-0.366	-0.272	-0.246	0.118	-0.344	-0.715	-0.839	-0.949	-0.591	-0.841	-0.288	-0.778	down	down	down					down	down	down	down	down		down
G5ECL6	CELE_ZK938.1	Serine/threonine-protein phosphatase	-1.134	-0.226	0.532	1.111	0.703	0.416	-1.444	-1.77	-1.429	0.502	-1.699	-0.902	-1.898	-1.612								down			down		down
P34537	rfp-1	E3 ubiquitin-protein ligase bre-1	-0.106	-0.05	0.089	0.114	0.151	0.346	-0.381	-0.336	-0.553	-0.836	-0.511	-0.681	0.002	-0.337						up			down	down	down	down
Q8MP09	nkat-3	Aminotran_1_2 domain-containing protein	-0.65	-0.729	-0.673	-0.728	-0.884	-0.929	-0.276	-0.219	-0.266	-0.344	-0.17	-0.244	-0.485	-0.708	down	down	down	down	down	down				down			down	down
P34426	F44B9.5	Lipid droplet-regulating VLDL assembly factor AUP1 homolog	-1.347	-1.161	-1.249	-1.281	-1.141	-0.787	-0.682	-1.02	-1.13	-0.679	-1.121	-1.314	-1.035	-1.413	down	down	down	down	down	down		down	down		down	down	down	down
Q9XWS6	CELE_Y62H9A.5	Uncharacterized protein	3.841	3.525	3.816	4.028	4.083	3.541	-0.857	0.466	2.148	2.807	3.313	3.607	3.785	3.702	up	up	up	up	up	up			up	up	up	up	up	up
P0AAC0	uspE	Universal stress protein E	0.719	3.235	0.938	1.271	1.153	0.551	-1.832	-0.471	0.598	0.057	1.693	1.589	1.736	0.057		up
Q19185	sgn-1	SarcoGlycaN	-2.283	-3.008	-2.724	-2.686	-2.834	-2.48	-0.883	-1.023	-1.794	-1.592	-1.711	-2.532	-3.222	-2.712	down	down	down	down	down	down		down	down	down	down	down	down	down
Q95ZT5	cox-19	CHCH domain-containing protein	1.04	0.504	1.423	1.953	0.996	1.56	1.372	1.026	0.623	1.494	1.413	1.739	1.493	0.055			up	up		up					up	up
P37344	pspF	Psp operon transcriptional activator	-0.813	1.453	0.051	-0.259	-0.302	-0.498	-1.328	-1.701	-2.109	-1.517	0.056	-0.781	-1.016	-1.522								down	down
Q21480	atg-2	Autophagy-related protein 2	-0.63	-0.704	-0.254	-0.036	-0.402	-0.272	-0.45	-0.351	-0.087	-0.265	-0.296	-0.177	-0.409	-0.425	down	down			down
A0A486WX07	ifg-1	MIF4G domain-containing protein	-0.689	-0.828	-0.813	-0.749	-0.804	-0.901	-0.177	-0.194	-0.348	-0.372	-0.481	-0.558	-0.821	-0.564	down	down	down	down	down	down		down	down	down	down	down	down	down
O62327	gpx-2	Glutathione peroxidase 2	-0.087	-0.23	-0.381	-0.503	-0.552	-0.411	0.245	0.18	0.049	-0.037	0.03	-0.082	-0.187	-0.441			down	down	down	down								down
Q18947	ule-3	Uterine Lumin Expressed/locailized	3.641	3.987	4.094	4.399	4.173	3.729	0.817	1.851	3.016	3.432	3.676	3.106	4.195	3.77	up	up	up	up	up	up		up	up	up	up	up	up	up
O17065	CELE_F23F1.4	Uncharacterized protein	0.072	-0.291	0.51	0.683	0.956	1.167	-0.548	-0.63	-0.769	-0.904	-0.751	-0.403	0.038	-0.533			up	up	up	up		down	down	down	down
Q17450	clec-51	C-type LECtin	-2.961	-3.139	-2.416	-3.701	-2.871	-3.21	-1.167	-1.929	-2.347	-2.185	-3.794	-2.621	-2.195	-2.841	down	down	down	down	down	down		down	down	down	down	down	down	down
O02266	alh-7	Aldedh domain-containing protein	-0.801	-0.866	-1.485	-1.34	-1.215	-1.045	-0.591	-0.988	-1.001	-0.812	-1.036	-0.846	-1.12	-1.149	down	down	down	down	down	down		down	down	down	down	down	down	down
F5GUG4	CELE_T04C12.11	Uncharacterized protein	-0.285	-0.635	-0.363	-0.298	-0.301	-0.242	-0.757	-0.634	-0.866	-0.554	-0.29	-0.424	-0.573	-0.663									down
Q17542	cest-5.2	Carboxyl ESTerase domain containing	1.167	1.401	1.347	1.417	1.447	1.598	-0.42	-0.16	0.335	0.448	0.504	0.912	0.964	0.939	up	up	up	up	up	up					up	up	up	up
H2FLL1	lea-1	Plant Late Embryo Abundant (LEA) related	0.817	0.781	0.779	0.628	0.743	0.455	-0.305	-0.227	0.239	0.426	0.624	0.549	0.258	0.586	up	up	up	up	up	up				up	up	up		up
Q9NEQ8	CELE_Y59A8B.8	Uncharacterized protein	-0.487	-0.421	-0.059	-0.149	-0.124	-0.052	-0.349	-0.483	-0.707	-0.187	-0.573	-0.692	-0.612	-0.454	down	down						down	down		down	down	down	down
Q8MXT6	col-106	Col_cuticle_N domain-containing protein	-7.371	-6.909	-7.39	-8.316	-8.236	-7.677	-1.019	-1.913	-2.982	-2.991	-3.382	-4.594	-6.535	-7.641	down	down	down	down	down	down		down	down	down	down	down	down	down
G5ED77	alg-3	Argonaute (Plant)-Like protein	0.682	0.36	0.365	1.909	0.761	0.712	1.582	1.239	0.398	-0.681	1.613	1.728	1.317	1.562				up							up
Q95QN2	ddx-23	RNA helicase	-0.029	-0.248	-0.018	0.049	0.096	0.254	-0.336	-0.581	-0.722	-0.55	-0.379	-0.537	-0.015	-0.309								down	down	down	down	down
P45969	sds-22	Protein phosphatase 1 regulatory subunit SDS22 homolog	-0.555	-0.615	-0.748	-0.624	-0.632	-0.564	-0.315	-0.676	-0.788	-0.745	-0.672	-0.585	-0.773	-0.779	down	down	down	down	down	down		down	down	down	down	down	down	down
Q11102	tag-278	Putative protein tag-278	-2.954	-3.651	-3.263	-2.908	-2.523	-3.393	-1.861	-3.193	-3.968	-3.311	-1.802	-3.833	-4.088	-4.481	down	down	down	down	down	down		down	down	down		down	down	down
Q18758	klo-1	KLOtho (Mammalian aging-associated protein) homolog	-0.529	-0.259	-0.297	-0.789	-0.572	-0.586	-0.66	-0.818	-0.817	-0.478	-0.632	-0.135	-0.508	-0.878				down	down	down		down	down					down
Q17410	lin-24	Uncharacterized protein	0.319	0.769	0.766	0.574	1.343	1.32	-0.468	-0.211	-0.135	0.272	0.027	0.076	0.058	0.299		up	up	up	up	up
Q9XW63	CELE_Y75B8A.24	1-phosphatidylinositol 4-kinase	-0.036	-0.002	-0.094	-0.033	0.076	0.127	-0.304	-0.431	-0.458	-0.376	-0.254	-0.179	-0.136	-0.239								down	down	down
Q19056	CELE_E04F6.4	Uncharacterized protein	0.963	1.193	0.734	0.652	0.724	0.869	-0.6	-0.272	0.22	0.404	0.251	1.092	0.641	0.505	up	up	up	up	up	up						up
Q19848	vrk-1	Serine/threonine-protein kinase VRK1	0.865	0.811	1.295	1.397	1.363	1.755	0.316	0.338	0.356	0.47	0.251	0.169	0.892	0.71	up	up	up	up	up	up			up	up			up	up
Q21944	R11F4.1	Probable glycerol kinase	2.125	1.407	1.355	3.591	1.281	2.884	1.455	0.825	0.276	0.297	1.034	1.383	1.448	2.026	up		up	up	up	up								up
Q95QM5	unc-115	Uncharacterized protein	0.258	0.464	0.239	0.36	0.365	0.547	-0.379	-0.375	-0.341	0.102	-0.238	0.143	0.103	0.124		up		up	up	up
Q10663	icl-1	Bifunctional glyoxylate cycle protein	0.47	0.587	0.349	-0.2	-0.319	0.184	0.583	0.569	0.756	1.049	1.065	1.181	0.738	0.395									up	up	up	up	up
Q9N3F3	mrpl-17	39S ribosomal protein L17, mitochondrial	-1.254	-1.353	-1.767	-1.602	-1.661	-1.712	-0.472	-0.798	-1.081	-0.936	-1.127	-1.54	-1.033	-1.066	down	down	down	down	down	down		down	down	down	down	down	down	down
Q93546	CELE_F20G2.3	CRAL-TRIO domain-containing protein	-1.995	-2.602	-2.842	-3.029	-3.185	-3.455	-1.139	-1.559	-1.377	-1.397	-2.007	-1.818	-1.716	-2.572	down	down	down	down	down	down		down	down	down	down	down	down	down
O44490	elks-1	Mammalian ELKS/CAST/ERC/Rab6 interacting protein homolog	-0.241	0.476	-0.177	-0.287	0.007	-0.135	-0.67	-0.702	-0.388	-0.185	-0.574	-0.984	-0.432	0.169												down
P91353	mrpl-24	Probable 39S ribosomal protein L24, mitochondrial	-0.783	-0.865	-1.327	-1.309	-1.295	-1.563	-0.27	-0.358	-0.363	-0.273	-0.6	-0.823	-0.782	-0.803	down	down	down	down	down	down		down	down		down	down	down	down
A0A0K3ARQ4	CELE_T14B4.8	Uncharacterized protein	-1.564	-1.292	-2.421	-2.863	-2.206	-2.622	-3.764	-2.985	-4.962	-5.98	-1.376	-3.357	-1.762	-4.24									down	down
Q9N4E2	CELE_Y73C8B.3	Uncharacterized protein	-0.876	-0.843	-0.885	-1.101	-0.924	-1.144	-0.393	-0.379	-0.531	-0.326	-0.51	-0.394	-0.696	-0.78	down	down	down	down	down	down			down		down		down	down
Q8I4K3	CELE_F30F8.9	LETM1 domain-containing protein	-0.924	-0.684	-0.872	-0.932	-0.95	-0.791	-0.352	-0.338	-0.531	-0.742	-0.904	-0.811	-1.114	-1.14	down	down	down	down	down	down			down	down	down	down	down	down
Q9BL76	natc-3	Sm domain-containing protein	-0.577	-0.501	-1.117	-0.965	-0.811	-0.644	-0.589	-0.783	-0.692	-0.324	-0.87	-1.161	-0.831	-0.807			down	down	down	down		down	down		down	down	down	down
Q19660	CELE_F21C10.10	Uncharacterized protein	0.75	0.751	0.065	-0.193	-0.745	0.034	0.681	0.913	1.571	1.475	1.479	1.415	0.979	1.041					down			up	up	up	up	up	up	up
P0A873	trmD	tRNA (guanine-N(1)-)-methyltransferase	0.638	2.774	1.35	1.111	1.511	1.456	1.062	-0.586	1.05	0.625	1.266	0.893	0.829	0.358		up	up	up	up	up					up
Q9XWU5	CELE_Y41C4A.8	Uncharacterized protein	-1.465	-1.585	-1.749	-2.065	-1.806	-1.633	-1.343	-2.265	-2.714	-2.097	-1.153	-2.769	-1.91	-1.667		down	down	down	down	down		down	down	down		down	down	down
Q19434	CELE_F13H8.9	Aminotran_5 domain-containing protein	0.431	0.567	0.588	0.495	0.652	0.565	-0.397	-0.287	0.009	-0.025	0.287	0.409	0.548	0.438		up	up	up	up	up							up
Q21037	orc-2	Origin recognition complex subunit 2	0.415	0.235	0.659	0.835	0.747	0.94	0.402	0.285	0.501	0.101	0.285	0.277	0.496	0.624			up	up	up	up			up				up	up
Q7YTR9	C27B7.9	Uncharacterized protein	4.727	4.738	4.706	5.02	4.829	4.799	1.041	3.73	3.969	3.678	4.812	3.714	4.993	4.155	up	up	up	up	up	up		up	up	up	up	up	up	up
Q22942	cka-2	Choline kinase A2	-0.098	-0.148	0.286	0.242	0.233	-0.054	-0.622	-0.887	-0.337	-0.223	-0.273	-0.021	0.019	0.002								down
Q27512	nex-2	Annexin	0.169	-0.241	-0.455	-0.378	-0.167	0.283	-0.58	-0.778	-0.718	-0.408	-0.553	-0.255	-0.184	-0.32								down	down
Q94207	sup-36	SUPpressor	0.345	-0.442	0.243	0.157	0.162	0.482	0.406	0.3	0.123	0.216	0.258	0.046	0.131	-0.09						up
O62185	rsr-1	PWI domain-containing protein	-1.024	-0.975	-0.11	-0.229	-0.356	0.228	-0.54	-0.929	-1.532	-1.412	-1.383	-1.211	-0.87	-1.692	down	down						down	down	down	down	down	down	down
P0AGL7	rsmE	Ribosomal RNA small subunit methyltransferase E	-0.169	2.748	0.548	0.787	1.271	0.84	-1.191	-0.505	0.466	-1.025	1.632	0.669	1.191	0.574		up			up						up
P45568	dxr	1-deoxy-D-xylulose 5-phosphate reductoisomerase	-2.285	-0.153	-0.609	0.062	-0.636	0.362	-1.65	-2.625	-1.793	-1.901	-1.253	-0.602	-0.614	-1.265	down							down	down
Q95Q00	such-1	Suppressor of spindle checkpoint defect 1	0.181	-0.31	0.662	0.54	0.759	0.622	0.568	0.793	0.544	0.731	0.323	0.278	0.243	0.281			up	up	up	up		up		up
Q9N4N3	perm-3	ER membrane protein complex subunit 4	-0.899	-0.902	-0.982	-1.062	-0.906	-0.697	-0.792	-0.93	-0.938	-1.716	-0.893	-1.621	-0.898	-1.642			down	down	down			down	down	down	down	down		down
G5EF77	sars-2	Serine--tRNA ligase	-0.446	-0.54	-0.734	-0.844	-0.606	-0.772	-0.3	-0.391	-0.351	-0.292	-0.39	-0.218	-0.611	-0.44	down	down	down	down	down	down		down	down		down		down	down
P25535	ubiI	2-octaprenylphenol hydroxylase	2.734	5.145	2.616	2.947	3.365	3.091	1.865	1.208	2.592	1.742	3.295	3.194	4.064	2.334	up	up	up	up	up	up			up		up	up	up	up
P75830	macA	Macrolide export protein MacA	-0.205	1.729	0.617	1.237	1.371	0.948	-1.264	0.238	-0.056	-0.523	0.123	0.616	0.591	-0.169		up		up	up
Q21053	vps-35	Vacuolar protein sorting-associated protein 35	-0.735	-0.802	-0.715	-0.747	-0.821	-0.615	-0.434	-0.543	-0.609	-0.91	-0.592	-0.83	-0.614	-0.785	down	down	down	down	down	down		down	down	down	down	down	down	down
Q20128	exos-9	Exosome complex component RRP45	-0.702	-0.919	-0.684	-0.311	-0.629	-0.651	-0.403	-0.568	-0.769	-1.145	-0.815	-0.602	-0.556	-0.68	down	down	down		down	down		down	down	down	down	down	down	down
Q9XWS4	rpl-30	60S ribosomal protein L30	-1.426	-1.631	-1.473	-1.629	-1.72	-1.838	-0.457	-0.869	-0.96	-0.744	-1.286	-1.226	-1.392	-1.241	down	down	down	down	down	down		down	down	down	down	down	down	down
A7DT40	CELE_F49D11.10	Uncharacterized protein	-1.2	-1.301	-1.44	-1.564	-1.436	-1.626	-0.423	-0.786	-1.05	-1.041	-1.409	-1.158	-1.559	-1.408	down	down	down	down	down	down		down	down	down	down	down	down	down
Q1ZXV0	CELE_ZK669.5	Uncharacterized protein	-1.038	-0.508	-0.838	-0.701	-0.353	0.093	-1.288	-1.972	-2.07	-1.237	-0.63	-0.978	-0.889	-0.877								down	down
Q9XW42	prmt-7	Protein arginine N-methyltransferase 7	-0.079	-0.118	-0.166	-0.314	-0.137	-0.206	-0.276	-0.285	-0.168	-0.318	-0.115	-0.226	-0.265	-0.149				down
Q95XN1	CELE_Y71G12B.10	Hydroxymethylglutaryl-CoA lyase	-0.278	-0.184	-0.553	-0.504	-0.548	-0.525	-0.245	-0.429	-0.176	-0.376	-0.024	-0.157	-0.144	-0.186			down	down	down	down		down		down
P91027	chdp-1	Calponin-homology (CH) domain-containing protein	0.772	0.731	0.949	0.869	1.116	1.125	-0.36	-0.387	-0.758	-0.669	-0.145	-0.328	0.672	0.463	up	up	up	up	up	up			down	down			up	up
Q19294	mat-3	Cell division cycle protein 23 homolog	0.597	0.364	0.514	0.548	0.51	0.704	0.278	0.424	0.35	0.473	0.455	0.264	0.59	0.616	up	up	up	up	up	up		up	up	up	up		up	up
Q09951	F59B10.3	Uncharacterized protein F59B10.3	-0.98	-1.826	-2.016	-2.318	-2.008	-2.018	-1.364	-1.158	-1.949	-2.273	-1.738	-1.251	-1.068	-2.879		down	down	down	down	down			down	down	down			down
H2L031	tag-153	NOT2_3_5 domain-containing protein	0.351	0.255	0.531	0.55	0.461	-0.009	0.401	0.649	0.806	0.805	0.715	0.438	0.428	0.63			up	up	up			up	up	up	up			up
Q9GYK2	C05D9.3	Uncharacterized integrin beta-like protein C05D9.3	-1.001	-0.96	-1.441	-1.036	-1.32	-0.903	-0.521	-1.033	-1.333	-1.393	-1.094	-1.17	-1.081	-1.413	down	down	down	down	down	down		down	down	down	down	down	down	down
Q22664	ctf-8	Chromosome Transmission Fidelity factor homolog	0.787	0.355	0.396	0.523	0.345	0.917	0.994	0.579	0.444	0.647	0.542	0.63	1.33	1.163						up							up
A0A4V0IJ83	CELE_F08F1.4	Uncharacterized protein	-0.995	-1.382	2.091	3.022	2.239	3.026	-1.903	-2.247	-1.814	-2.305	-1.545	-1.313	-1.797	-1.662			up	up	up	up		down		down
P0AFB5	glnL	Sensory histidine kinase/phosphatase NtrB	0.705	1.937	0.844	1.448	1.402	1.067	0.966	0.121	0.115	1.439	0.161	0.671	0.722	0.547		up		up	up	up				up
Q23403	CELE_ZK1127.3	Uncharacterized protein	0.547	0.594	1.137	1.22	0.804	1.221	0.781	0.534	-0.118	0.637	0.127	0.555	0.943	0.442			up	up	up	up							up
O01576	npp-11	Nuclear Pore complex Protein	-0.072	-0.434	0.457	0.495	0.418	0.665	0.385	-0.044	-0.228	-0.168	-0.425	-0.231	0.012	0.056			up	up	up	up					down
Q9N361	mrps-25	Probable 28S ribosomal protein S25, mitochondrial	-1.375	-2.069	-1.697	-1.532	-1.844	-1.771	-0.563	-1.006	-1.388	-2.115	-1.306	-1.748	-1.458	-1.739	down	down	down	down	down	down		down	down	down	down	down	down	down
P75822	ybjT	Putative NAD(P)-binding protein YbjT	-0.296	0.374	-0.168	0.495	0.09	-0.421	-0.994	-0.867	-0.797	0.848	-0.48	-1.171	-0.6	-0.659												down
P91252	gst-6	Probable glutathione S-transferase 6	-0.374	-0.038	-0.622	-0.501	-0.652	-0.593	-0.691	-0.425	-0.394	-0.497	0.061	-0.126	-0.155	-0.427					down
Q95XH0	CELE_Y69A2AR.28	Uncharacterized protein	1.485	1.318	1.189	0.849	1.05	1.145	0.608	0.864	1.145	1.619	1.07	1.051	1.236	1.415	up	up	up	up	up	up		up	up	up	up	up	up	up
P34281	cids-1	CID domain-containing protein 1	0.239	0.19	0.545	0.425	0.597	0.701	0.35	0.354	0.134	0.389	0.055	0.158	0.231	0.106			up	up	up	up
Q8ITZ7	srab-9	Serpentine Receptor, class AB (Class A-like)	-1.024	-1.216	-1.03	-0.853	-1.55	-0.917	-1.816	-1.828	-1.545	-3.708	-1.039	-1.467	-1.436	-2.007					down					down
Q20177	CELE_F38E9.1	Uncharacterized protein	1.318	1.605	2.087	2.256	2.35	2.32	0.346	0.52	0.661	0.934	0.606	1.12	1.282	1.561	up	up	up	up	up	up		up	up	up	up	up	up	up
Q09397	skpt-1	F-box domain-containing protein	1.579	1.463	0.615	1.562	0.593	0.666	1.625	1.878	2.001	2.423	2.339	0.413	1.573	1.594				up				up	up	up	up
Q18813	C53D6.7	Galectin	-0.223	-0.271	-0.652	-0.858	-0.761	-0.814	-0.389	-0.571	-0.307	-0.136	-0.186	-0.077	-0.517	-0.301			down	down	down	down		down					down
A5JYT3	C01H6.8	Uncharacterized protein	-1.393	-1.25	-0.837	-1.258	-0.841	-1.188	-0.665	0.095	-0.623	-0.509	-0.514	-1.24	-0.797	-1.515	down	down	down	down	down	down						down	down	down
Q09567	CELE_F48E8.3	FAD_binding_2 domain-containing protein	0.086	0.362	0.863	0.715	0.895	0.759	-0.49	-0.604	-0.298	-0.746	0.17	0.038	0.253	0.295			up	up	up	up		down		down
Q9U362	pgrn-1	ProGRaNulin homolog	-1.087	-0.361	-0.66	-0.572	-1.01	-0.879	-0.886	-0.526	-1.609	-1.154	-1.084	-0.569	-0.621	-0.462	down				down	down			down	down	down
Q9XXA2	ebp-2	Microtubule End Binding Protein	0.13	-0.037	0.463	0.425	0.223	0.219	0.265	0.247	0.228	0.402	0.36	0.053	0.242	0.439			up	up						up	up			up
O62277	dct-18	DAF-16/FOXO Controlled, germline Tumor affecting	-5.103	-4.162	-6.54	-6.21	-6.154	-5.668	-1.412	-1.975	-3.139	-4.007	-2.951	-3.904	-3.82	-4.86	down	down	down	down	down	down		down	down	down	down	down	down	down
P0AB40	bhsA	Multiple stress resistance protein BhsA	-2.075	2.915	-0.055	-0.492	-0.212	0.815	-1.301	-0.248	-0.454	-0.485	0.521	0.002	0.857	-0.443	down	up
P0AFH8	osmY	Osmotically-inducible protein Y	0.641	4.512	2.004	2.753	1.342	1.099	-2.341	0.093	1.239	0.409	2.534	2.605	2.573	0.173		up		up							up
P33363	bglX	Periplasmic beta-glucosidase	0.641	1.813	1.948	2.063	2.378	2.516	-1.079	-0.095	0.357	1.083	0.74	1.12	0.938	1.244		up	up	up	up	up
G5EGS3	klp-12	Kinesin-like protein	-0.454	-0.454	-0.06	-0.086	0.174	0.133	-0.242	-0.152	-0.248	-0.272	-0.285	-0.277	-0.377	-0.473	down	down									down	down	down	down
P52709	tars-1	Threonine--tRNA ligase, cytoplasmic	-0.407	-0.451	-0.328	-0.351	-0.328	-0.242	-0.201	-0.284	-0.355	-0.454	-0.488	-0.455	-0.621	-0.351	down	down	down	down	down	down		down	down	down	down	down	down	down
P61320	lolB	Outer-membrane lipoprotein LolB	-1.35	0.911	-0.125	-0.545	0.132	-0.464	-1.502	-1.976	-1.89	-0.865	-1.748	-0.555	-0.546	-1.053								down	down		down
P37806	unc-87	Protein unc-87	-0.581	-0.422	-0.74	-0.754	-0.926	-1.175	-0.411	-0.738	-0.819	-0.898	-0.715	-0.46	-0.681	-0.518	down		down	down	down	down		down	down	down	down		down	down
Q8IG32	CELE_F09E5.16	Uncharacterized protein	-0.223	-1.195	-0.032	-0.194	-0.186	0.585	-1.252	-2.168	-1.672	-1.34	-1.069	-0.871	-0.853	-0.86								down	down
Q966C7	tald-1	Transaldolase	-1.837	-2.041	-1.683	-1.656	-1.93	-1.693	-0.321	-0.676	-0.97	-1.401	-1.268	-1.387	-1.841	-1.977	down	down	down	down	down	down		down	down	down	down	down	down	down
P54412	eef-1G	Probable elongation factor 1-gamma	-0.763	-0.829	-0.641	-0.416	-0.628	-0.645	-0.259	-0.274	-0.44	-0.349	-0.63	-0.507	-0.801	-0.662	down	down	down	down	down	down			down	down	down	down	down	down
Q8WQE8	lab-2	Long Arms of the Bivalent protein	0.058	-0.392	-0.769	-0.254	-0.732	-0.234	1.132	1.435	1.297	1.244	0.964	1.087	-0.141	0.385								up	up
Q19481	CELE_F15B9.6	Uncharacterized protein	1.392	1.411	1.373	1.333	0.665	0.776	-1.546	-0.884	1.243	1.343	2.849	2.205	1.938	1.85											up	up	up
B9WRT9	mlt-11	Uncharacterized protein	-1.849	-2.357	-2.861	-2.857	-1.971	-2.191	-1.472	-1.799	-2.31	-2.534	-3.674	-3.302	-0.896	-3.148	down	down	down	down	down	down		down	down	down	down	down		down
U4PBJ9	fln-1	Calponin-homology (CH) domain-containing protein	0.23	0.236	0.058	0.157	0.069	0.054	-0.226	-0.284	-0.09	0.043	0.123	0.167	-0.068	0.156								down
Q22918	C37C3.2	Eukaryotic translation initiation factor 5	-0.616	-0.666	-0.957	-0.954	-0.876	-0.756	-0.243	-0.285	-0.301	-0.447	-0.542	-0.654	-0.574	-0.722	down	down	down	down	down	down		down	down	down	down	down	down	down
Q22684	CELE_T22E5.6	Uncharacterized protein	1.777	2.982	2.653	2.922	3.15	2.975	1.108	1.87	2.368	2.763	2.397	2.756	2.824	2.832	up	up	up	up	up	up		up	up	up	up	up	up	up
O44952	lonp-1	Lon protease homolog, mitochondrial	-0.244	-0.375	-0.424	-0.49	-0.426	-0.454	-0.222	-0.349	-0.441	-0.35	-0.209	-0.308	-0.396	-0.369		down	down	down	down	down		down	down	down		down	down	down
Q3HKC5	CELE_F14B8.5	Uncharacterized protein	-0.831	-0.542	-0.237	0.173	0.385	-0.161	-0.714	-0.657	-0.713	-1.295	-0.654	-0.341	-0.478	-0.645										down
Q09278	C45G9.5	Uncharacterized protein C45G9.5	-0.829	-0.98	-0.484	-0.441	-0.443	-0.39	-0.292	-0.446	-0.594	-0.739	-0.832	-0.757	-0.943	-0.789	down	down	down	down	down	down		down	down	down	down	down	down	down
Q9BPN5	zig-11	Ig-like domain-containing protein	0.453	0.514	0.504	0.432	0.651	0.626	-0.311	-0.236	-0.17	0.025	-0.073	0.21	0.187	0.319	up	up	up	up	up	up
P76535	murQ	N-acetylmuramic acid 6-phosphate etherase	-0.885	1.618	0.107	0.025	0.673	0.026	-1.486	-1.153	-0.179	-0.549	-0.219	-0.546	0.396	-0.245
Q10661	dpy-30	Dosage compensation protein dpy-30	0.957	-0.57	2.14	2.083	2.044	1.812	1.157	1.216	0.273	-2.252	0.726	0.529	0.446	0.553			up	up	up	up				down
Q17491	rbg-3	Rab-GAP TBC domain-containing protein	1.029	1.085	1.688	1.727	1.643	1.618	0.508	0.974	0.994	1.204	1.182	1.179	1.43	1.223	up	up	up	up	up	up		up	up	up	up	up	up	up
Q9N5R9	spt-16	FACT complex subunit spt-16	0.705	0.5	0.958	0.973	0.924	1.058	0.28	0.07	0.091	0.113	0.292	0.113	0.627	0.652	up	up	up	up	up	up					up		up	up
P76506	mlaA	Intermembrane phospholipid transport system lipoprotein MlaA	-0.331	0.487	-0.15	-0.027	0.314	0.083	-1.083	-0.996	-0.681	-0.144	-0.773	-0.523	-0.762	0.179
P47207	cct-2	T-complex protein 1 subunit beta	-0.866	-1.207	-0.716	-0.585	-0.668	-0.711	-0.257	-0.376	-0.566	-0.632	-0.883	-0.95	-0.924	-0.674	down	down	down	down	down	down		down	down	down	down	down	down	down
Q22715	CELE_T24B8.4	Uncharacterized protein	0.072	0.246	-0.232	-0.174	-0.386	-0.578	-0.4	-0.345	-0.172	-0.219	-0.083	0.061	0.061	-0.012					down	down
P47209	cct-5	T-complex protein 1 subunit epsilon	-0.793	-0.945	-0.86	-0.813	-0.861	-0.887	-0.266	-0.359	-0.375	-0.444	-0.645	-0.737	-0.781	-0.612	down	down	down	down	down	down		down	down	down	down	down	down	down
G5EFL1	hex-2	Beta-N-acetylhexosaminidase	-0.578	-0.196	-0.511	-0.361	-1.066	-0.587	-0.633	-0.241	-0.277	-0.077	0.05	0.176	0.012	-0.385					down	down
O62136	inx-14	Innexin-14	0.385	0.243	0.635	0.706	0.661	0.275	0.549	0.982	1.026	1.059	1.182	0.515	0.434	0.674			up	up	up			up	up	up	up			up
P21507	srmB	ATP-dependent RNA helicase SrmB	-0.707	2.236	0.556	0.992	0.925	0.731	-1.609	-0.676	-0.194	1.508	0.227	0.439	1.373	0.599		up
G5ECJ6	csk-1	Tyrosine-protein kinase csk-1	-1.917	-0.824	-0.09	0.031	-0.168	0.329	-0.787	-1.618	-1.75	-1.759	-2.768	-1.509	-2.192	-1.011	down							down	down	down	down	down	down	down
Q9XW58	CELE_Y75B8A.7	U3 small nucleolar ribonucleoprotein protein MPP10	-0.961	-1.114	-0.992	-1.039	-0.939	-1.223	-0.401	-0.597	-0.911	-1.126	-1.019	-0.962	-1.276	-1.116	down	down	down	down	down	down		down	down	down	down	down	down	down
K8ESK9	pod-1	Coronin-7	0.214	0.251	0.031	0.027	-0.018	-0.113	0.232	0.409	0.369	0.405	0.389	0.265	0.311	0.301								up	up	up	up	up	up	up
O17742	CELE_E03H4.8	Coatomer_WDAD domain-containing protein	0.258	0.318	-0.489	-2.147	-0.899	-0.768	-1.388	-0.267	0.743	0.476	-0.328	0.292	1.134	0.601				down
Q21284	CELE_K07E3.4	Formate--tetrahydrofolate ligase	-0.683	-0.477	-0.666	-0.696	-0.673	-0.567	0.317	0.288	0.115	0.251	-0.089	0.011	-0.58	-0.824	down	down	down	down	down	down							down	down
Q8ITY4	C50D2.5	Splicing factor 3B subunit 6-like protein	-0.882	-0.896	-0.734	-0.909	-0.709	-0.342	-0.576	-0.727	-0.835	-0.977	-0.954	-1.027	-0.543	-0.87	down	down	down	down	down			down	down	down	down	down		down
Q20025	pfn-2	Profilin-2	-0.834	-0.857	-0.958	-1.034	-1.055	-1	-0.408	-0.695	-0.84	-0.575	-0.634	-0.67	-0.914	-1.149	down	down	down	down	down	down		down	down	down	down	down	down	down
Q8MXI1	ucr-11	Ubiquinol-Cytochrome c oxidoReductase complex	-1.115	-1.319	-2.046	-1.964	-1.878	-1.687	-0.5	-0.338	-0.627	-0.417	-0.751	-0.895	-1.01	-1.099	down	down	down	down	down	down			down		down	down	down	down
Q9N4P9	exos-4.2	RNase_PH domain-containing protein	-1.574	-1.508	-1.04	-1.014	-1.171	-1.001	-0.601	-1.165	-1.072	-1.033	-2.107	-1.586	-1.802	-1.661	down	down	down	down	down	down		down	down	down	down	down	down	down
Q19969	ima-3	Importin subunit alpha-3	-1.188	-1.009	-0.877	-0.873	-0.855	-0.711	-0.522	-0.824	-1.193	-1.293	-0.92	-1.087	-1.447	-1.552	down	down	down	down	down	down		down	down	down	down	down	down	down
Q9TYJ7	dpm-1	Dolichol-phosphate mannosyltransferase subunit 1	-0.853	-0.628	-1.344	-1.487	-1.351	-1.171	-0.395	-0.269	-0.46	-0.781	-0.733	-0.991	-0.812	-1.019	down	down	down	down	down	down			down	down	down	down	down	down
Q46939	yqeF	Probable acetyl-CoA acetyltransferase	-0.918	0.696	-0.274	-0.258	0.294	0.183	-1.049	-1.386	-1.002	-0.821	-0.526	-0.619	-0.071	-0.499								down
Q18244	C27B7.5	CCHC-type domain-containing protein	-0.585	-0.749	-1.041	-1.088	-0.941	-1.249	-0.44	-0.363	-0.414	-0.328	-0.493	-0.467	-0.809	-0.587	down	down	down	down	down	down					down		down	down
Q966P8	C36B7.6	Uncharacterized protein	-0.503	-0.438	-0.78	-0.884	-0.761	-0.844	-0.386	-0.245	-0.239	-0.406	-0.271	-0.652	-0.502	-0.689	down		down	down	down	down						down	down	down
Q9U2Q8	fkb-2	Peptidylprolyl isomerase	-0.261	-0.243	-0.142	-0.033	-0.176	-0.129	-0.345	-0.348	-0.272	-0.322	-0.31	-0.142	-0.363	-0.295
Q11099	snet-1	Protein snet-1	-1.037	-1.089	0.206	0.17	0.179	-0.055	-0.823	-1.166	-1.163	-1.596	-1.234	-0.391	-1.274	-1.329	down	down						down	down	down	down		down	down
Q11100	tag-52	Putative protein tag-52	1.048	0.808	1.533	1.482	1.457	1.649	-0.922	0.333	-0.023	0.093	-0.35	-0.14	1.116	0.682			up	up	up	up							up
F5GU86	otub-3	OTU domain-containing protein	0.418	0.8	0.146	0.376	0.512	0.57	0.439	0.053	-0.041	0.366	0.041	-0.068	0.421	0.333		up			up	up
P0A8Z7	yqiA	Esterase YqiA	-1.208	1.358	0.321	-0.999	-0.457	-0.316	-1.8	-1.907	-0.928	0.149	0.163	0.233	1.335	-0.319
Q17556	rml-4	NAD(P)-bd_dom domain-containing protein	-1.81	-1.983	-2.154	-2.381	-2.249	-1.859	-0.54	-0.719	-1.011	-1.363	-1.233	-1.553	-1.336	-2.096	down	down	down	down	down	down		down	down	down	down	down	down	down
Q22770	ugt-54	Glucuronosyltransferase	-1.421	-0.937	-0.349	0.045	-0.703	-0.516	-1.182	-0.697	-1.235	-1.03	-0.837	-0.758	-0.672	-0.549
Q17949	dohh-1	Deoxyhypusine hydroxylase	-0.51	-0.615	-0.837	-0.848	-0.852	-0.94	-0.251	-0.231	-0.213	-0.183	-0.411	-0.391	-0.507	-0.438	down	down	down	down	down	down					down	down	down	down
Q19266	pkc-3	Protein kinase C-like 3	0.292	0.576	0.554	0.495	0.71	0.638	-0.395	-0.303	-0.162	-0.318	-0.276	0.036	0.247	0.27		up	up	up	up	up
Q9BKP7	C49A9.9	Uncharacterized protein	-1.912	-1.43	-2.011	-1.921	-1.658	-2.083	-0.61	-0.49	-0.917	-0.76	-1.548	-1.246	-1.61	-1.645	down	down	down	down	down	down			down	down	down	down	down	down
P18196	minC	Septum site-determining protein MinC	-0.041	1.701	0.557	0.913	0.391	0.731	-1.207	-0.221	-0.078	-0.438	0.103	-0.004	0.561	0.128		up
Q9N2V9	pde-6	Probable 3',5'-cyclic phosphodiesterase pde-6	-0.415	-0.466	-0.301	-0.345	-0.268	-0.138	-0.399	-0.381	-0.312	-0.038	-0.33	-0.278	-0.562	-0.314													down
G5EG14	cacn-1	Cactin	0.352	0.216	0.563	0.44	0.46	0.446	0.258	0.179	0.083	0.136	0.156	0.075	0.322	0.324	up		up	up	up	up							up	up
P50306	sams-4	Probable S-adenosylmethionine synthase 4	-1.011	-1.021	-0.989	-0.895	-1.197	-0.779	-0.407	-0.585	-0.778	-0.981	-0.975	-0.883	-0.985	-0.898	down	down	down	down	down	down		down	down	down	down	down	down	down
G5EEI8	chp-1	Cysteine and histidine-rich domain-containing protein 1	-0.544	-0.729	-0.916	-0.87	-0.87	-0.969	-0.343	-0.45	-0.378	-0.407	-0.596	-0.706	-0.691	-0.409	down	down	down	down	down	down		down	down		down	down	down
Q17512	nduf-11	NADH Ubiquinone oxidoreductase Fe-S protein	-1.062	-1.118	-1.125	-0.997	-1.106	-1.138	-0.283	-0.539	-0.919	-0.705	-1.129	-0.847	-1.226	-1.029	down	down	down	down	down	down		down	down	down	down	down	down	down
O44727	cpn-4	Calponin-homology (CH) domain-containing protein	-0.243	0.017	-0.361	-0.459	-0.402	-0.357	-0.662	-1.025	-0.552	-0.788	-0.5	-0.162	-0.205	-0.215								down
Q20840	drd-5	Dietary restriction down regulated	-4.742	-3.826	-4.003	-4.34	-3.836	-3.826	-0.885	-0.722	-1.027	-0.791	-2.723	-2.072	-3.48	-3.889	down	down	down	down	down	down			down		down	down	down	down
Q21993	pfd-5	Probable prefoldin subunit 5	-1.075	-1.03	-0.931	-0.976	-0.846	-0.927	-0.417	-0.624	-0.76	-0.599	-0.934	-0.729	-1.095	-0.787	down	down	down	down	down	down		down	down	down	down	down	down	down
P77213	ybdK	Putative glutamate--cysteine ligase 2	-1.486	-0.723	-3.998	-1.371	-0.652	-1.369	-4.23	-5.322	-1.162	-5.689	-2.344	-1.064	-1.402	-2.633			down					down		down
P63284	clpB	Chaperone protein ClpB	0.206	3.446	0.572	1.335	1.007	0.107	-2.32	-0.697	0.774	0.157	1.611	1.6	1.892	-0.197		up
P90859	hrdl-1	E3 ubiquitin-protein ligase hrd-like protein 1	-1.261	-1.097	-1.114	-1.152	-0.857	-1.314	-0.827	-1.119	-1.369	-0.75	-1.122	-1.192	-1.053	-1.275	down	down	down	down	down	down		down	down		down	down	down	down
Q09410	emb-1	Anaphase-promoting complex subunit emb-1	0.928	0.456	-0.127	0.152	-0.056	0.327	0.664	0.991	0.753	0.687	0.646	0.384	0.801	0.995	up							up	up				up	up
Q9XTB5	lem-2	LEM protein 2	1.053	1.029	1.242	1.317	1.374	1.757	0.429	-0.022	-0.266	-0.094	-0.211	-0.029	1.049	0.578	up	up	up	up	up	up							up	up
Q10937	B0310.1	Uncharacterized protein B0310.1	-0.486	-0.265	-0.513	-0.623	-0.46	-0.946	-0.576	-0.516	-0.457	-0.186	-0.857	-0.506	-0.647	-0.596				down		down					down
P34475	tbg-1	Tubulin gamma chain	0.438	0.387	0.422	0.497	0.496	0.485	0.278	0.196	0.352	0.466	0.288	0.237	0.443	0.534	up	up	up	up	up	up			up	up	up		up	up
P77269	yphF	ABC transporter periplasmic-binding protein YphF	-2.178	-1.127	-1.861	-1.886	-1.465	-1.627	1.337	1.83	0.579	-0.734	0.532	-0.464	-0.906	-0.368	down		down	down	down	down		up
Q18786	snr-4	Probable small nuclear ribonucleoprotein Sm D2	-1.149	-2.005	-0.87	-0.977	-1.076	-1.092	-0.764	-1.675	-1.9	-3.91	-1.928	-1.582	-2.225	-1.474	down	down	down	down	down	down		down	down	down	down	down	down	down
Q9TY03	frh-1	Frataxin, mitochondrial	-0.947	-0.715	-0.409	-0.363	-0.409	-0.435	-0.434	-0.42	-0.591	-0.244	-0.602	-0.215	-0.59	-0.54	down	down	down		down	down			down		down		down	down
Q18318	rbmx-2	RRM domain-containing protein	0.676	0.486	0.509	0.395	0.498	0.568	0.319	0.364	0.539	0.479	0.401	0.535	0.798	0.613	up	up	up	up	up	up		up	up	up	up	up	up	up
Q22431	ari-2	Potential E3 ubiquitin-protein ligase ariadne-2	-1.484	-1.222	-2.246	-2.393	-2.273	-2.378	-1.459	-2.182	-2.486	-2.68	-2.426	-2.325	-2.286	-2.657			down	down	down	down		down	down	down	down	down	down	down
O16649	CELE_T06D4.1	Uncharacterized protein	-0.358	0.359	1.045	0.664	0.766	0.528	0.798	0.343	-0.004	-0.184	-0.403	-0.164	0.819	0.09			up		up
O45182	CELE_K07H8.2	Uncharacterized protein	-0.74	-0.7	-0.055	0.024	-0.149	-0.213	-0.455	-0.512	-0.872	-0.479	-0.32	-0.898	-0.608	-0.482	down	down							down			down	down
Q9XWG3	Y63D3A.4	5'-tyrosyl-DNA phosphodiesterase	0.624	0.741	1.284	1.199	1.337	1.529	0.618	0.804	0.716	0.726	0.569	0.548	0.748	0.628			up	up	up	up		up	up				up
P76097	ydcJ	2-oxoadipate dioxygenase/decarboxylase	-0.523	2.5	-0.036	0.793	0.573	0.026	-1.509	-0.881	-0.218	0.162	0.853	1.071	0.673	-0.823		up
Q23027	inx-5	Innexin-5	-1.154	-0.958	-0.639	-0.426	-0.512	-0.14	-0.817	-1.928	-2.332	-2.791	-1.878	-2.146	-2.007	-1.802	down							down	down	down	down	down	down	down
O17666	aspm-1	Calponin-homology (CH) domain-containing protein	0.629	0.526	1.118	0.978	0.899	0.957	0.318	0.334	0.43	0.637	0.461	0.335	0.712	0.74	up	up	up	up	up	up			up	up	up		up	up
Q22307	rha-1	ATP-dependent RNA helicase A	-0.16	-0.276	0.176	0.146	0.196	0.379	-0.23	-0.359	-0.394	-0.24	-0.482	-0.363	-0.104	-0.224						up		down	down		down	down
P07023	tyrA	T-protein	0.411	1.877	1.094	0.786	1.331	1.201	1.079	0.189	0.665	0.897	-0.557	1.134	0.157	0.032		up	up		up	up
Q9XVE9	rpl-14	60S ribosomal protein L14	-1.303	-2.319	-1.402	-1.495	-1.565	-1.759	-0.682	-0.962	-1.202	-1.126	-1.557	-1.217	-2.106	-1.262	down	down	down	down	down	down		down	down	down	down	down	down	down
P90793	CELE_D2030.8	Uncharacterized protein	0.284	1.124	1.057	1.071	1.308	1.508	0.809	0.41	0.726	0.683	0.995	0.947	0.963	0.957		up	up	up	up	up					up	up
Q95QH4	CELE_F32A5.8	Uncharacterized protein	-1.242	-1.358	-1.518	-1.662	-1.609	-1.733	-0.34	-0.697	-0.929	-0.827	-0.77	-1.083	-1.054	-1.408	down	down	down	down	down	down		down	down	down	down	down	down	down
P0AC81	gloA	Lactoylglutathione lyase	-1.262	2.305	-0.887	-0.401	-0.705	-0.671	-1.579	-0.64	-0.661	-1.009	0.417	0.408	0.632	-1.263		up
Q10130	dhs-5	Uncharacterized oxidoreductase dhs-5	0.899	-0.93	-0.238	0.462	0.712	0.136	-1.499	-1.241	-1.832	-1.218	-2.109	-1.744	0.512	-0.424									down		down	down
Q10009	T19C3.3	Uncharacterized protein T19C3.3	-0.162	-0.277	0.354	0.342	0.365	0.722	-0.602	-0.581	-0.812	-1.409	-0.308	-0.687	-0.508	-0.993						up			down	down				down
B2D6K9	saps-1	Serine/threonine-protein phosphatase 6 regulatory subunit	-0.589	-0.629	-0.468	-0.395	-0.372	-0.25	-0.318	-0.589	-0.75	-1.122	-0.833	-1.024	-0.541	-0.824	down	down	down	down	down			down	down	down	down	down	down	down
P37902	gltI	Glutamate/aspartate import solute-binding protein	-1.157	2.116	-0.72	0.12	-0.527	-0.352	-1.961	-0.711	-0.492	-0.596	0.63	0.457	0.798	-1.501
Q9NA74	CELE_Y57A10A.26	Uncharacterized protein	0.856	1.15	0.962	1.251	1.255	1.711	-0.481	-0.575	-0.281	-0.359	-0.018	0.163	0.463	0.302	up	up	up	up	up	up		down
Q23120	rsp-2	Probable splicing factor, arginine/serine-rich 2	-0.658	-0.832	-0.646	-0.678	-0.575	-0.049	-0.477	-0.727	-1.048	-1.159	-1.27	-1.237	-0.508	-1	down	down	down	down	down			down	down	down	down	down		down
Q95Y96	CELE_M04F3.4	Uncharacterized protein	-0.054	-0.319	-0.049	-0.24	0	0.145	-0.437	-0.431	-0.504	-0.31	-0.297	-0.25	0.083	-0.244									down
Q9GRV9	pcp-4	Prolyl Carboxy Peptidase like	-1.14	-1.042	-0.831	-0.79	-0.79	-0.654	-0.472	-0.535	-0.943	-0.278	-0.729	-0.971	-0.86	-0.88	down	down	down	down	down	down			down		down	down	down	down
Q09436	mex-6	Zinc finger protein mex-6	0.806	0.636	1.04	1.087	0.929	0.45	0.427	0.747	1.11	1.335	1.236	0.989	0.659	1.071	up	up	up	up	up	up		up	up	up	up	up	up	up
Q11117	lmp-1	LAMP family protein lmp-1	-0.446	-0.733	-0.479	-0.813	-0.741	-0.419	-0.467	-0.497	-0.704	-0.297	-0.858	-0.303	-0.338	-0.577		down	down	down	down				down		down			down
Q21463	asns-2	Asparagine synthetase [glutamine-hydrolyzing]	-1.501	-2.348	-1.657	-1.705	-2.167	-1.484	-0.943	0.073	-0.011	-0.268	-1.008	-0.93	-0.829	-2.062	down	down	down	down	down	down					down			down
Q10923	ntl-2	NOT2_3_5 domain-containing protein	-0.391	-0.397	0.244	0.251	0.328	0.233	0.298	0.067	0.028	-0.01	-0.322	-0.339	-0.433	-0.09	down	down			up						down		down
Q17746	C06G3.6	ZZ-type domain-containing protein	-0.928	-0.988	-1.059	-1.477	-1.184	-0.508	-1.382	-1.538	-0.841	-2.405	-0.665	-1.576	-0.388	-1.854				down						down				down
P32173	mobA	Molybdenum cofactor guanylyltransferase	-0.348	1.859	0.715	0.588	0.303	0.959	0.936	-0.37	-0.649	0.265	0.789	-0.152	0.108	-0.475		up				up
Q23421	gtap-1	Gamma-Tubulin Associating Protein	-0.923	-1.133	-0.502	-0.524	-0.246	-0.784	-0.955	-1.566	-0.933	0.358	-1.117	-0.491	-1.531	-0.888								down			down		down
P91194	CELE_D2092.4	Thioredoxin domain-containing protein	0.041	0.215	-0.081	-0.047	-0.174	0.005	-0.247	-0.314	-0.278	-0.266	0.093	0.083	-0.084	-0.27								down	down
Q19706	eif-3.G	Eukaryotic translation initiation factor 3 subunit G	-1.199	-1.423	-0.895	-0.864	-0.927	-0.98	-0.306	-0.619	-1.169	-1.052	-1.251	-1.04	-1.439	-1.194	down	down	down	down	down	down		down	down	down	down	down	down	down
Q9N3S4	rnp-6	Poly(U)-binding-splicing factor rnp-6	-0.423	-0.384	-0.495	-0.579	-0.424	-0.217	-0.334	-0.52	-0.563	-0.619	-0.683	-0.735	-0.229	-0.416	down		down	down	down			down	down	down	down	down		down
P0ABB4	atpD	ATP synthase subunit beta	-0.721	1.725	-0.264	0.512	-0.469	-0.377	-1.971	-1.313	-0.748	-1.532	-0.262	-0.256	0.214	-0.526
P34416	F42H10.3	LIM and SH3 domain protein F42H10.3	-0.767	-0.722	-0.712	-0.731	-0.637	-0.643	-0.482	-0.899	-1.223	-1.369	-1.089	-0.645	-0.625	-0.696	down	down	down	down	down	down		down	down	down	down	down	down	down
O01975	cmt-1	Protein cmt-1	-0.329	-1.458	-1.42	-1.348	-1.028	-1.126	0.962	0.221	-0.326	-0.858	-0.108	-0.91	0.067	-0.245		down	down	down	down	down
Q18797	C53B4.3	MFS domain-containing protein	-3.715	-3.911	-3.056	-3.26	-3.319	-3.498	-1.077	-2.504	-2.627	-3.775	-3.373	-2.943	-3.606	-3.46	down	down	down	down	down	down		down	down	down	down	down	down	down
O02089	msra-1	Peptide-methionine (S)-S-oxide reductase	-3.47	-3.259	-4.067	-4.182	-4.154	-4.285	-0.363	-0.266	-0.663	-1.259	-1.779	-2.298	-2.653	-3.223	down	down	down	down	down	down			down	down	down	down	down	down
Q18389	C33F10.1	Uncharacterized protein	-0.891	-1.636	-0.035	-0.5	-0.535	-0.366	-1.063	-0.901	-1.438	-0.878	-1.445	-0.877	-1.433	-1.283		down							down		down		down
O61235	ctl-1	Catalase-2	0.517	0.807	0.269	0.003	0.095	-0.029	0.297	0.524	0.688	0.552	0.914	0.779	0.585	0.457	up	up						up	up	up	up	up	up	up
P34462	vha-14	V-type proton ATPase subunit D	-1.04	-0.756	-1.039	-0.926	-1.179	-0.944	-0.45	-0.636	-0.684	-0.449	-0.958	-0.793	-1.076	-1.054	down	down	down	down	down	down		down	down		down	down	down	down
Q23255	mre-11	Double-strand break repair protein mre-11	0.586	0.531	0.889	0.897	0.841	0.744	0.329	0.484	0.444	0.451	0.581	0.473	0.639	0.547	up	up	up	up	up	up		up	up	up	up	up	up	up
P0A8G3	uxaC	Uronate isomerase	0.69	2.313	0.812	0.926	1.166	0.755	-1.119	-0.13	0.908	0.138	1.421	1.32	1.41	-0.037		up			up						up	up	up
Q19058	maoc-1	MAO-C-like dehydratase domain	0	0.119	-0.356	-0.734	-0.474	-0.704	0.473	0.585	0.072	0.36	-0.023	0.255	0.02	-0.019				down	down	down		up
Q20471	kin-20	Casein kinase I isoform delta	-1.355	-1.286	-1.231	-1.614	-1.255	-1.296	-0.748	-0.573	-1.127	-0.796	-1.49	-1.065	-1.018	-1.117	down	down	down	down	down	down			down		down	down	down	down
Q9TXQ1	tank-1	Poly [ADP-ribose] polymerase tankyrase	-0.538	-1.029	-0.447	-0.557	-0.358	-0.13	-0.464	-0.6	-0.557	-0.615	-0.816	-0.82	-0.523	-1.006		down	down	down				down	down	down	down	down		down
Q8ITY6	C50D2.9	PKS_AT domain-containing protein	0.013	0.002	0.065	0.158	0.07	0.002	-0.327	-0.411	-0.056	0.134	0.178	0.266	0.214	0.119								down
Q23680	vha-9	Probable V-type proton ATPase subunit F	-0.653	-0.476	-1.168	-0.975	-1.083	-0.792	-0.528	-0.714	-0.932	-0.671	-0.947	-0.452	-0.563	-0.765			down	down	down	down		down	down	down	down			down
P25738	msyB	Acidic protein MsyB	-0.911	1.517	-0.234	-0.347	-0.22	-0.546	-1.431	-0.855	-0.609	-1.008	0.564	0.156	0.155	-1.407
Q19545	utp-20	DRIM domain-containing protein	-1.046	-1.227	-0.558	-0.566	-0.698	-0.732	-0.401	-0.734	-0.882	-0.884	-1.223	-0.894	-1.289	-1.067	down	down	down	down	down	down		down	down	down	down	down	down	down
Q9BKS2	CELE_Y82E9BR.14	GLTP domain-containing protein	-0.441	-0.103	-0.566	-0.678	-0.549	-0.681	-0.289	-0.107	-0.375	-0.214	-0.126	-0.547	-0.308	-0.4	down		down	down	down	down			down			down		down
Q94246;Q94247	gfi-1	GEI-4 (Four) Interacting protein;Uncharacterized protein	-1.152	-2.268	-0.199	0.16	-0.088	-0.554	-1.343	-2.761	-1.768	-2.012	-1.47	-1.912	-1.922	-1.547		down						down	down	down	down	down	down
Q21452	M01F1.3	Lipoyl synthase, mitochondrial	-1.414	-1.481	-0.897	-0.939	-0.834	-1.043	-0.441	-0.573	-0.645	-0.634	-1.022	-1.055	-1.535	-1.629	down	down	down	down	down	down		down	down	down	down	down	down	down
[truncated: 6,569 more rows]
