# Supplementary material
Source: Research Square preprint supplement (doi:10.21203/rs.3.rs-9541370/v1)
Supplement: Supplementary file 4 [file 29b95455650b17c2bf04dc47.xlsx]

## Sheet: Sheet1
Protein IDs	Gene name	Protein names	WormBase	logFC mprs / glp	logFC mprs / ncl	logFC mprs / popl	logFC ncl / glp	logFC popl / glp	logFC popl / ncl	Significant_direction mprs / glp	Significant_direction mprs / ncl	Significant_direction mprs / popl	Significant_direction ncl / glp	Significant_direction popl / glp	Significant_direction popl / ncl
Q21276	nol-56	Nucleolar protein 56	WBGene00010627	1.636	0.077	0.141	1.559	1.496	-0.064	up		up	up	up
O45012	nol-58	Nop domain-containing protein	WBGene00020915	1.657	0.194	0.135	1.462	1.522	0.059	up	up	up	up	up
O17919	K01G5.5	Putative H/ACA ribonucleoprotein complex subunit 4	WBGene00010478	1.897	0.174	0.109	1.722	1.788	0.066	up	up		up	up
Q9BL64	CELE_Y54H5A.2	Protein HGH1 homolog	WBGene00021900	1.637	0.089	0.122	1.548	1.515	-0.033	up			up	up
Q22135	nifk-1	RRM domain-containing protein	WBGene00011408	1.584	0.117	0.125	1.467	1.459	-0.008	up			up	up
O62106	eif-6	Eukaryotic translation initiation factor 6	WBGene00001234	1.49	-0.02	0.134	1.51	1.356	-0.155	up			up	up	down
Q21086	nst-1	Guanine nucleotide-binding protein-like 3 homolog	WBGene00003821	1.964	0.103	0.093	1.861	1.871	0.01	up			up	up
P91154	C43E11.9	60S ribosome subunit biogenesis protein NIP7 homolog	WBGene00016607	1.485	0.202	0.063	1.282	1.422	0.139	up	up		up	up	up
Q21210	CELE_K04C2.2	Uncharacterized protein	WBGene00019380	1.649	0.284	0.27	1.366	1.379	0.014	up	up	up	up	up
Q9XW58	CELE_Y75B8A.7	U3 small nucleolar ribonucleoprotein protein MPP10	WBGene00013544	1.751	0.015	0.201	1.735	1.55	-0.185	up		up	up	up	down
Q9TYK1	Y66H1A.4	Probable H/ACA ribonucleoprotein complex subunit 1-like protein	WBGene00022046	2.285	0.11	0.078	2.175	2.207	0.032	up			up	up
Q9U210	CELE_Y57A10A.27	Uncharacterized protein	WBGene00013267	1.649	0.035	0.098	1.613	1.55	-0.063	up			up	up
Q9TYV5	nsun-1	26S rRNA (cytosine-C(5))-methyltransferase nsun-1	WBGene00021073	1.609	0.194	0.156	1.416	1.453	0.038	up	up	up	up	up
O01541	aars-2	Alanine--tRNA ligase, cytoplasmic	WBGene00000197	0.882	0.057	-0.026	0.825	0.908	0.083	up			up	up
Q9XVR8	nola-3	Putative H/ACA ribonucleoprotein complex subunit 3	WBGene00007708	1.948	0.171	0.085	1.777	1.863	0.086	up			up	up
O16999	W03F9.1	Zinc finger protein ZPR1 homolog	WBGene00020999	1.259	0.093	0.108	1.166	1.151	-0.015	up			up	up
Q22053	fib-1	rRNA 2'-O-methyltransferase fibrillarin	WBGene00001423	1.573	0.167	0.112	1.406	1.461	0.055	up			up	up
O01806	ssb-1	Sjogren Syndrome antigen B homolog	WBGene00016653	1.769	0.557	0.581	1.211	1.188	-0.023	up	up	up	up	up
Q9XXD4	Y48A6B.3	Putative H/ACA ribonucleoprotein complex subunit 2-like protein	WBGene00012964	1.995	0.119	0.112	1.876	1.883	0.007	up			up	up
O61815	B0511.6	RNA helicase	WBGene00015232	2.04	0.371	0.378	1.669	1.662	-0.007	up	up	up	up	up
Q9UAY9	rpac-40	RPOLD domain-containing protein	WBGene00019275	1.879	0.222	0.212	1.656	1.667	0.011	up			up	up
Q9TYV3	CELE_W07E6.2	WD_REPEATS_REGION domain-containing protein	WBGene00021074	1.565	0.228	0.257	1.337	1.308	-0.029	up	up	up	up	up
Q21298	CELE_K07F5.14	Uncharacterized protein	WBGene00010638	1.931	0.035	0.226	1.896	1.705	-0.191	up			up	up
P34640	ZK512.2	Probable ATP-dependent RNA helicase DDX55 homolog	WBGene00013983	1.507	0.162	0.225	1.345	1.283	-0.063	up		up	up	up
P41842	trd-1	Tetratricopeptide repeat-containing protein trd-1	WBGene00020600	1.258	-0.027	-0.108	1.286	1.366	0.081	up			up	up
Q9BL15	nsun-2	tRNA (cytosine(34)-C(5))-methyltransferase	WBGene00021686	0.951	-0.084	-0.009	1.035	0.96	-0.075	up			up	up
Q9N5V3	imb-3	Importin N-terminal domain-containing protein	WBGene00002077	0.815	-0.071	0.11	0.886	0.705	-0.181	up			up	up	down
Q22046	CELE_T01B7.5	Sas10 domain-containing protein	WBGene00011311	1.994	0.024	0.235	1.971	1.76	-0.211	up			up	up
Q09996	lars-1	Leucine--tRNA ligase	WBGene00003073	1.073	0.035	-0.177	1.038	1.25	0.213	up		down	up	up	up
G5EC98	ctps-1	CTP synthase	WBGene00012316	0.873	-0.077	-0.165	0.95	1.038	0.088	up		down	up	up
G5ED21	rpoa-1	DNA-directed RNA polymerase subunit	WBGene00012999	1.463	0.108	0.147	1.355	1.316	-0.039	up			up	up
O44411	nog-1	Nucleolar GTP-binding protein 1	WBGene00020297	1.724	0.32	0.221	1.404	1.503	0.099	up	up	up	up	up
Q965N8	CELE_Y46E12BL.2	NUC173 domain-containing protein	WBGene00021595	1.5	0.346	0.22	1.155	1.28	0.125	up	up	up	up	up
P34696	hsp-16.11	Heat shock protein Hsp-16.1/Hsp-16.11	WBGene00002017;WBGene00002015	2.597	0.055	-0.32	2.542	2.917	0.375	up			up	up	up
Q9NEW7	elpc-2	Elongator complex protein 2	WBGene00013738	1.177	0.265	0.132	0.912	1.044	0.132	up	up		up	up
Q9XUU8	CELE_K05C4.5	Uncharacterized protein	WBGene00010582	1.836	0.157	0.217	1.679	1.619	-0.06	up			up	up
Q27493	rpoa-2	DNA-directed RNA polymerase subunit beta	WBGene00008781	1.393	0.159	0.143	1.233	1.25	0.016	up			up	up
P42000	B0280.9	U3 small nucleolar RNA-associated protein 18 homolog	WBGene00015104	2.051	0.352	0.323	1.698	1.727	0.029	up	up	up	up	up
Q9XVS4	dao-5	Nucleolar protein dao-5	WBGene00000931	1.826	0.135	0.091	1.69	1.734	0.044	up			up	up
A7DT40	CELE_F49D11.10	Uncharacterized protein	WBGene00045433	1.417	0.183	0.16	1.234	1.257	0.023	up			up	up
Q9U2K8	abce-1	ABC transporter, class E	WBGene00012714	0.679	-0.037	0.071	0.716	0.607	-0.108	up			up	up
Q20932	byn-1	Uncharacterized protein byn-1	WBGene00000276	1.787	0.238	0.279	1.549	1.508	-0.041	up		up	up	up
Q09622	puf-12	Pumilio domain-containing protein 12	WBGene00014165	1.57	0.243	0.165	1.327	1.405	0.078	up	up		up	up
Q9U229	wah-1	Worm AIF (Apoptosis inducing factor) Homolog	WBGene00006937	0.534	-0.042	0.005	0.576	0.529	-0.047	up			up	up
Q8MXQ7	Y92H12BL.1	Threonylcarbamoyladenosine tRNA methylthiotransferase	WBGene00022363	1.199	0.124	0.13	1.075	1.07	-0.005	up			up	up
O18215	CELE_Y53C12B.1	WD_REPEATS_REGION domain-containing protein	WBGene00013143	1.379	0.145	0.145	1.234	1.234	0	up			up	up
Q09527	E02H1.6	Adenylate kinase isoenzyme 6 homolog	WBGene00008458	1.484	0.177	-0.15	1.307	1.634	0.328	up			up	up	up
Q9NAG4	mac-1	Protein mac-1	WBGene00003119	1.437	0.074	-0.066	1.363	1.504	0.141	up			up	up
Q95XY4	nol-6	Nucleolar protein 6	WBGene00021789	1.415	0.137	0.204	1.278	1.211	-0.067	up			up	up
P34476	rpac-19	Probable DNA-directed RNA polymerases I and III subunit RPAC2	WBGene00010230	2.048	0.317	0.201	1.731	1.847	0.116	up	up		up	up
Q9XXN0	pus-1	PseudoU_synth_1 domain-containing protein	WBGene00004248	1.73	0.139	0.334	1.59	1.396	-0.195	up		up	up	up
Q9GYS8	fars-1	Phenylalanine--tRNA ligase	WBGene00001497	0.565	0.016	0.062	0.549	0.502	-0.046	up			up	up
Q9N3F0	Y54E10A.10	Ribosome production factor 2 homolog	WBGene00021830	1.302	0.016	0.212	1.287	1.09	-0.197	up			up	up
P34580	T26G10.1	Putative ATP-dependent RNA helicase T26G10.1	WBGene00012059	2.852	0.236	0.116	2.616	2.736	0.12	up			up	up
Q95Q34	riok-2	Serine/threonine-protein kinase RIO2	WBGene00013688	2.197	-0.09	0.066	2.286	2.131	-0.156	up			up	up
P02513	hsp-16.49	Heat shock protein Hsp-16.48/Hsp-16.49	WBGene00002019;WBGene00002020	2.49	-0.014	-0.206	2.505	2.696	0.191	up			up	up
Q17606	rpl-24.2	Probable ribosome biogenesis protein RLP24	WBGene00004437	2.629	0.256	0.333	2.373	2.296	-0.078	up			up	up
Q19433	CELE_F13H8.2	WD_REPEATS_REGION domain-containing protein	WBGene00017435	1.219	0.09	0.114	1.129	1.105	-0.024	up			up	up
P41843	T20B12.3	Uncharacterized protein T20B12.3	WBGene00020601	1.415	0.154	0.224	1.262	1.191	-0.071	up		up	up	up
G5EEZ4	3E324	WD repeat-containing protein 55	WBGene00012858	1.271	0.079	0.087	1.192	1.184	-0.008	up			up	up
G5EG50	CELE_T04A11.1	Uncharacterized protein	WBGene00011416;WBGene00011419	-1.048	0.045	0.309	-1.092	-1.357	-0.264	down		up	down	down	down
P34611	ncl-1	B-box type zinc finger protein ncl-1	WBGene00003559	-2.782	0.549	0.003	-3.33	-2.785	0.545	down			down	down
Q17533	exos-4.1	Putative exosome complex component RRP41	WBGene00007201	1.297	-0.069	0.01	1.366	1.287	-0.079	up			up	up
Q9U294	CELE_Y48B6A.13	Diphosphomevalonate decarboxylase	WBGene00012984	0.971	0.052	-0.047	0.919	1.018	0.098	up			up	up
Q9XXN4	ngp-1	Nucleolar GTP-binding protein 2	WBGene00003596	1.52	0.181	0.19	1.34	1.33	-0.009	up			up	up
Q18037	znf-622	C2H2-type domain-containing protein	WBGene00015809	1.618	0.343	0.364	1.274	1.254	-0.021	up	up	up	up	up
P91340	CELE_F55F8.2	RNA helicase	WBGene00018890	1.598	0.116	0.279	1.482	1.318	-0.163	up		up	up	up
Q09974	ttc-4	Wheel domain-containing protein	WBGene00015916	1.065	0.093	0.096	0.972	0.969	-0.004	up			up	up
Q19873	wdr-46	WD_REPEATS_REGION domain-containing protein	WBGene00009211	1.286	-0.012	0.054	1.298	1.232	-0.066	up			up	up
P91529	W09C3.4	Probable DNA-directed RNA polymerase III subunit RPC6	WBGene00021112	1.197	0.02	0.088	1.177	1.109	-0.068	up			up	up
P34524	K12H4.3	Ribosome biogenesis protein BRX1 homolog	WBGene00019678	1.604	0.291	0.298	1.313	1.306	-0.007	up	up	up	up	up
P27604	ahcy-1	Adenosylhomocysteinase	WBGene00019322	0.682	0.032	0.063	0.65	0.619	-0.031	up			up	up
Q17949	dohh-1	Deoxyhypusine hydroxylase	WBGene00007555	1.016	-0.082	0.079	1.098	0.937	-0.161	up			up	up
P91343	wdr-12	Ribosome biogenesis protein WDR12 homolog	WBGene00018893	1.684	0.058	-0.535	1.626	2.218	0.593	up		down	up	up	up
Q19007	nap-1	Nucleosome Assembly Protein	WBGene00017075	1.294	0.358	0.331	0.936	0.963	0.026	up	up	up	up	up
Q20306	abcf-3	ABC transporter, class F	WBGene00018339	0.505	-0.037	-0.042	0.542	0.547	0.005	up			up	up
P34183	hars-1	Histidine--tRNA ligase	WBGene00002001	0.481	-0.055	-0.023	0.537	0.504	-0.032	up			up	up
Q9N393	CELE_Y54H5A.1	WD_REPEATS_REGION domain-containing protein	WBGene00021899	1.402	0.206	0.112	1.196	1.29	0.094	up			up	up
Q18035	C16A3.6	Protein MAK16 homolog	WBGene00015811	2.046	0.018	0.182	2.028	1.864	-0.164	up			up	up
O17157	C24H12.4	RNA helicase	WBGene00016073	1.395	0.264	0.327	1.131	1.068	-0.064	up	up	up	up	up
P10771	his-24	Histone 24	WBGene00001898	-0.774	0.324	0.119	-1.098	-0.893	0.205	down	up		down	down
Q18989	CELE_D2045.9	Uncharacterized protein	WBGene00008426	0.899	0.129	0.183	0.77	0.716	-0.054	up		up	up	up
Q95Y89	lpd-7	Pescadillo homolog	WBGene00003063	1.208	0.269	0.228	0.939	0.98	0.042	up	up	up	up	up
Q9NEU5	Y39B6A.33	Ribosome biogenesis protein NOP53	WBGene00012692	1.787	0.29	0.258	1.496	1.528	0.032	up			up	up
Q94402	nol-16	Nucleolar protein 16	WBGene00013958	1.584	0.002	0.197	1.582	1.387	-0.195	up			up	up
Q9XX15	Y39A1A.14	Ribosomal RNA small subunit methyltransferase nep-1	WBGene00012652	1.865	0.085	0.329	1.78	1.536	-0.244	up			up	up
Q9N3D3	CELE_Y54E10BR.4	RNA-binding protein NOB1	WBGene00021843	1.246	-0.071	0.064	1.317	1.182	-0.135	up			up	up
O61235	ctl-1	Catalase-2	WBGene00000830	1.11	0.192	0.316	0.918	0.793	-0.125	up		up	up	up
P34452	F54F2.7	Uncharacterized protein F54F2.7	WBGene00018835	1.606	-0.008	-0.089	1.614	1.694	0.08	up			up	up
Q23494	CELE_ZK430.7	DDB1- and CUL4-associated factor 13	WBGene00022742	2.17	0.27	0.25	1.901	1.92	0.02	up			up	up
Q9N477	CELE_Y23H5B.5	U3 small nucleolar RNA-associated protein 15 homolog	WBGene00021276	1.095	0.184	0.108	0.911	0.987	0.076	up			up	up
A5Z2W3	CELE_R13H4.2	Uncharacterized protein	WBGene00014826	-0.498	0.163	-0.005	-0.661	-0.493	0.168	down	up		down	down	up
Q9NAQ2	CELE_JC8.2	WD_REPEATS_REGION domain-containing protein	WBGene00010435	1.221	-0.049	-0.011	1.269	1.232	-0.037	up			up	up
O45380	tps-2	Alpha,alpha-trehalose-phosphate synthase [UDP-forming] 2	WBGene00006603	-0.691	0.232	0.267	-0.923	-0.958	-0.035	down	up	up	down	down
Q23495	toe-1	HEAT repeat-containing protein 1 homolog	WBGene00022739	1.082	0.129	0.152	0.954	0.931	-0.023	up			up	up
Q21568	M28.5	NHP2-like protein 1 homolog	WBGene00010896	1.455	0.342	0.175	1.113	1.28	0.167	up	up		up	up
Q19825	rars-1	Probable arginine--tRNA ligase, cytoplasmic	WBGene00004679	0.491	-0.008	0.02	0.499	0.47	-0.028	up			up	up
Q9N3F2	CELE_Y54E10A.6	B3_4 domain-containing protein	WBGene00021828	0.827	0.117	0.051	0.71	0.776	0.067	up			up	up
Q20970	mars-1	Methionine--tRNA ligase, cytoplasmic	WBGene00003415	0.445	-0.039	-0.058	0.484	0.503	0.019	up			up	up
Q09359	ZK1307.1	Uncharacterized protein ZK1307.1	WBGene00014244	-0.575	0.167	-0.194	-0.743	-0.381	0.361	down		down	down	down	up
Q20476	CELE_F46G10.1	BTB domain-containing protein	WBGene00009796	-0.505	0.239	0.065	-0.744	-0.57	0.174	down	up		down	down	up
Q18680	pyp-1	Inorganic pyrophosphatase 1	WBGene00008149	0.396	-0.036	0.03	0.433	0.367	-0.066	up			up	up
Q9NA78	txdc-12.1	Thioredoxin domain-containing protein	WBGene00013263	0.778	-0.124	-0.181	0.902	0.958	0.056	up			up	up
Q95Y11	CELE_Y41D4B.11	Uncharacterized protein	WBGene00021514	2.398	0.538	0.345	1.86	2.053	0.193	up	up		up	up
Q10950	B0361.6	Putative methyltransferase B0361.6	WBGene00015160	2.159	0.332	0.173	1.827	1.987	0.159	up			up	up
Q95Y17	hpo-6	Uncharacterized protein	WBGene00021518	-0.379	0.436	0.04	-0.815	-0.419	0.396	down	up		down	down	up
G5ECG7	dsc-4	Microsomal triglyceride transfer protein homolog	WBGene00001099	-0.367	0.214	-0.056	-0.581	-0.311	0.27	down	up		down	down	up
Q95YC6	C45B2.1	Uncharacterized protein	WBGene00016658	1.015	0.066	0.526	0.949	0.489	-0.46	up		up	up	up	down
O44959	riok-1	Serine/threonine-protein kinase RIO1	WBGene00019698	0.781	-0.13	-0.041	0.911	0.822	-0.089	up			up	up
Q18938	gst-42	Probable maleylacetoacetate isomerase	WBGene00001790	-0.577	0.047	-0.069	-0.624	-0.508	0.116	down			down	down
O45181	nucl-1	RRM domain-containing protein	WBGene00019510	1.076	0.323	0.323	0.754	0.753	0	up	up	up	up	up
O02215	cbl-1	Cystathionine gamma-lyase	WBGene00007533	-0.574	0.107	-0.055	-0.681	-0.519	0.162	down			down	down
Q5WRS4	C06A6.4	N-acyl-aliphatic-L-amino acid amidohydrolase	WBGene00015509	-0.535	0.079	-0.012	-0.614	-0.523	0.091	down			down	down
Q9NAB3	gst-27	Glutathione S-Transferase	WBGene00001775	-0.618	-0.025	-0.053	-0.593	-0.565	0.028	down			down	down
P52709	tars-1	Threonine--tRNA ligase, cytoplasmic	WBGene00006617	0.356	-0.102	-0.286	0.458	0.642	0.184	up		down	up	up	up
P34384	mrpl-44	Ribosomal protein L44, mitochondrial	WBGene00008514	0.621	-0.044	-0.298	0.665	0.919	0.254	up		down	up	up	up
Q9XU67	rbd-1	RBD (RNA binding domain) protein	WBGene00004315	1.53	0.223	0.246	1.306	1.283	-0.023	up			up	up
P34460	eef-1B.1	Probable elongation factor 1-beta/1-delta 1	WBGene00018846	0.369	-0.21	-0.021	0.579	0.391	-0.189	up	down		up	up	down
Q09541	tpp-2	Tripeptidyl-peptidase 2	WBGene00017686	-0.432	-0.077	-0.064	-0.355	-0.368	-0.013	down			down	down
Q9N595	elpc-1	Elongator complex protein 1	WBGene00022463	0.735	0.081	0.127	0.654	0.608	-0.046	up			up	up
Q17684	rpb-6	Probable DNA-directed RNA polymerases I, II, and III subunit RPABC2	WBGene00007355	1.017	0.065	0.129	0.952	0.888	-0.064	up			up	up
Q9U3B6	nol-9	Polynucleotide 5'-hydroxyl-kinase nol-9	WBGene00010709	1.692	0.212	0.132	1.48	1.56	0.08	up			up	up
Q22705	CELE_T23G7.3	G-patch domain-containing protein	WBGene00011966	1.558	0.193	0.107	1.366	1.451	0.086	up			up	up
Q21336	tmed-1	GOLD domain-containing protein	WBGene00010670	0.494	-0.279	-0.091	0.773	0.584	-0.189	up	down		up	up
Q21153	K02F3.2	Probable calcium-binding mitochondrial carrier K02F3.2	WBGene00019326	-0.39	0.046	0.008	-0.436	-0.397	0.039	down			down	down
Q9N5K2	rpb-5	DNA-directed RNA polymerases I, II, and III subunit RPABC1	WBGene00019246	1.337	0.399	0.219	0.938	1.118	0.18	up	up		up	up
Q9XVZ2	CELE_Y7A5A.1	Delta(24)-sterol reductase	WBGene00012407	-0.736	-0.033	0.076	-0.703	-0.812	-0.109	down			down	down
Q19341	haao-1	3-hydroxyanthranilate 3,4-dioxygenase	WBGene00010595	-0.435	0.102	-0.014	-0.537	-0.421	0.116	down			down	down
G5ECS9	cpt-2	Calponin-homology (CH) domain-containing protein	WBGene00011122	-0.437	-0.021	-0.178	-0.416	-0.259	0.157	down		down	down	down	up
Q95QX5	C07A12.7	GAT domain-containing protein	WBGene00015561	-0.422	-0.013	0.092	-0.408	-0.514	-0.105	down			down	down
D1MN80	ech-2	Enoyl-CoA Hydratase	WBGene00001151	0.492	-0.12	-0.215	0.612	0.707	0.095	up		down	up	up
O44476	hoe-1	Ribonuclease Z	WBGene00001983	0.949	-0.065	-0.191	1.014	1.14	0.126	up			up	up
P90790	CELE_D2030.3	Uncharacterized protein	WBGene00008413	1.197	0.167	0.071	1.031	1.127	0.096	up			up	up
Q09975	lys-8	LYSozyme	WBGene00003097	-1.135	0.418	-0.238	-1.553	-0.897	0.656	down			down	down	up
Q93353	idhb-1	Probable isocitrate dehydrogenase [NAD] subunit beta, mitochondrial	WBGene00007993	-0.414	0.22	-0.096	-0.634	-0.318	0.316	down	up		down	down	up
O16462	grd-5	Ground-like domain-containing protein	WBGene00001694	-0.666	0.536	0.258	-1.202	-0.925	0.278	down	up		down	down
O45241	C04H5.1	Multifunctional methyltransferase subunit TRM112-like protein	WBGene00007312	0.88	0.008	0.042	0.872	0.837	-0.035	up			up	up
Q9BL28	CELE_Y71H2AM.1	Probable tRNA N6-adenosine threonylcarbamoyltransferase	WBGene00022166	0.843	-0.145	0.156	0.988	0.687	-0.301	up			up	up	down
Q2L6Y6	hsp-75	HATPase_c domain-containing protein	WBGene00020110	0.46	-0.074	-0.231	0.534	0.691	0.157	up		down	up	up	up
Q9N3Q9	nol-14	NucleOLar protein	WBGene00021660	1.128	0.146	0.202	0.982	0.926	-0.056	up			up	up
Q9U2X0	prmt-1	Protein arginine N-methyltransferase 1	WBGene00013766	0.446	-0.028	0.045	0.474	0.402	-0.072	up			up	up
Q22295	ugt-50	Putative UDP-glucuronosyltransferase ugt-50	WBGene00011564	-0.684	-0.086	-0.171	-0.598	-0.513	0.085	down		down	down	down
Q9NAF8	CELE_Y48C3A.18	Threonylcarbamoyl-AMP synthase	WBGene00012997	1.589	-0.254	0.086	1.843	1.502	-0.341	up			up	up
Q93694	gst-24	Glutathione S-Transferase	WBGene00001772	1.29	3.507	3.197	-2.217	-1.907	0.31	up	up	up	down	down
P91406	gcp-2.1	Glutamate carboxypeptidase 2 homolog	WBGene00020082	-0.532	0.32	-0.019	-0.853	-0.513	0.339	down	up		down	down	up
O45934	CELE_Y43F4B.5	Uncharacterized protein	WBGene00012803	-0.274	0.165	-0.018	-0.439	-0.256	0.183	down	up		down	down	up
B5BM47	CELE_T03D8.6	Uncharacterized protein	WBGene00011393	0.519	-0.318	-0.077	0.837	0.596	-0.241	up	down		up	up	down
O44662;O44664;O44665	nlp-31	Neuropeptide-like protein 31;Neuropeptide-like protein 29;Neuropeptide-like protein 28	WBGene00003769	1.369	-0.219	0.276	1.589	1.094	-0.495	up			up	up	down
G5EGL2	CELE_T28D6.6	OBG-type G domain-containing protein	WBGene00012126	0.597	0.027	0.094	0.57	0.504	-0.066	up			up	up
Q19554	abcf-1	ABC transporter, class F	WBGene00006512	0.607	0.048	0.002	0.559	0.605	0.046	up			up	up
Q18758	klo-1	KLOtho (Mammalian aging-associated protein) homolog	WBGene00016848	-0.831	0.127	-0.038	-0.958	-0.793	0.165	down			down	down
Q95X44	vha-8	V-type proton ATPase subunit E	WBGene00006917	-0.377	0.104	-0.06	-0.482	-0.317	0.164	down			down	down	up
Q21649	CELE_R02F2.7	Uncharacterized protein	WBGene00019836	1.029	0.094	0.167	0.936	0.863	-0.073	up			up	up
Q20684	lec-2	Galectin	WBGene00002265	-0.173	0.186	0.057	-0.359	-0.23	0.129	down	up		down	down	up
Q22006	pro-1	Pre-rRNA-processing protein pro-1	WBGene00004185	1.195	0.104	0.077	1.09	1.118	0.027	up			up	up
G5ECR0	CELE_T25C12.3	Uncharacterized protein	WBGene00012018	-0.455	0.034	0.058	-0.489	-0.513	-0.024	down			down	down
Q17539	C01B10.8	Methyltranfer_dom domain-containing protein	WBGene00015282	0.903	0.08	-0.036	0.823	0.939	0.116	up			up	up
Q10457	pacs-1	Probable multifunctional protein ADE2	WBGene00015116	-0.532	0.274	0.063	-0.805	-0.595	0.211	down	up		down	down
Q23551	unc-22	Twitchin	WBGene00006759	-0.19	0.139	0.074	-0.328	-0.264	0.065	down	up		down	down
Q9NAA7	nsun-5	26S rRNA (cytosine-C(5))-methyltransferase nsun-5	WBGene00013151	1.291	-0.175	0.067	1.467	1.224	-0.243	up			up	up
O17944	CELE_K10C3.5	Tr-type G domain-containing protein	WBGene00010732	1.013	0.134	0.036	0.878	0.976	0.098	up			up	up
A0A2C9C377	ampd-1	AMP deaminase	WBGene00016415	-0.048	0.325	0.334	-0.373	-0.382	-0.009		up	up	down	down
Q04457	ges-1	Gut esterase 1	WBGene00001578	-0.497	0.085	0.142	-0.582	-0.639	-0.057	down			down	down
Q9N362	CELE_Y55F3AM.13	Uncharacterized protein	WBGene00021930	0.451	0.038	-0.035	0.413	0.486	0.073	up			up	up
Q9TZL9	fard-1	Fatty acyl-CoA reductase	WBGene00022200	-0.569	0.071	0.07	-0.64	-0.639	0.002	down			down	down
Q21693	ife-2	Eukaryotic translation initiation factor 4E-2	WBGene00002060	0.407	-0.086	-0.022	0.493	0.43	-0.063	up			up	up
G5EFG4	abcf-2	ABC transporter, class F	WBGene00012097	0.437	0.031	0.07	0.406	0.367	-0.038	up			up	up
Q22820	ckc-1	Choline Kinase C	WBGene00000515	-0.283	0.14	0.242	-0.423	-0.525	-0.102	down	up	up	down	down
P30642	eif-3.D	Eukaryotic translation initiation factor 3 subunit D	WBGene00001227	0.49	-0.023	0.101	0.513	0.39	-0.124	up			up	up
Q23232	wdr-4	tRNA (guanine-N(7)-)-methyltransferase non-catalytic subunit	WBGene00022420	0.73	0.121	0.164	0.609	0.566	-0.043	up			up	up
O01802	rpl-7	60S ribosomal protein L7	WBGene00004418	0.198	-0.116	-0.027	0.314	0.226	-0.089	up	down		up	up
Q18038	let-716	Uncharacterized protein	WBGene00002850	0.966	0.206	0.218	0.76	0.748	-0.012	up			up	up
Q5FC37	CELE_D1086.12	Uncharacterized protein	WBGene00044082	-1.115	0.363	-0.121	-1.479	-0.994	0.484	down			down	down	up
O16338	asp-8	Peptidase A1 domain-containing protein	WBGene00019105	-1.862	-0.095	-1.299	-1.767	-0.563	1.204	down		down	down	down	up
Q22494	vha-15	Probable V-type proton ATPase subunit H 2	WBGene00020507	-0.31	0.069	-0.033	-0.379	-0.277	0.102	down			down	down
Q95XM9	ddx-27	RNA helicase	WBGene00022148	1.154	0.421	0.422	0.733	0.732	-0.001	up	up	up	up	up
G5ECA2	CELE_F29C6.1	Uncharacterized protein	WBGene00009243	-0.461	0.245	-0.177	-0.706	-0.283	0.422	down	up		down	down	up
H1UBK1	map-2	Methionine aminopeptidase 2	WBGene00003130	0.558	0.071	-0.002	0.487	0.56	0.073	up			up	up
Q9XXU9	vha-11	V-type proton ATPase subunit C	WBGene00006920	-0.34	0.068	-0.096	-0.408	-0.244	0.165	down			down	down	up
P91189	dnj-7	DNaJ domain (Prokaryotic heat shock protein)	WBGene00001025	-0.489	0.001	-0.047	-0.49	-0.443	0.047	down			down	down
Q22792	CELE_T25G3.3	60S ribosomal export protein NMD3	WBGene00012030	1.188	0.125	0.218	1.064	0.97	-0.093	up			up	up
P54412	eef-1G	Probable elongation factor 1-gamma	WBGene00008920	0.309	-0.068	-0.027	0.377	0.336	-0.041	up			up	up
Q20969	CELE_F58B3.4	NUC153 domain-containing protein	WBGene00010231	1.638	0.073	0.047	1.565	1.591	0.026	up			up	up
Q19713	fars-3	Phenylalanine--tRNA ligase beta subunit	WBGene00001498	0.543	0.078	0.068	0.464	0.474	0.01	up			up	up
Q9NEU3	tgt-2	Queuine tRNA-ribosyltransferase accessory subunit 2	WBGene00006567	2.117	0.234	0.231	1.883	1.886	0.004	up			up	up
Q7K707	gpi-1	Glucose-6-phosphate isomerase	WBGene00013597	-0.38	-0.032	-0.255	-0.348	-0.125	0.223	down		down	down	down	up
P91020	C07D8.6	Aldo_ket_red domain-containing protein	WBGene00015565	-0.276	0.14	0.044	-0.415	-0.319	0.096	down	up		down	down
Q22649	CELE_T21C9.6	Uncharacterized protein	WBGene00011893	-0.423	0.039	0.017	-0.462	-0.439	0.022	down			down	down
P53589	sucg-1	Succinate--CoA ligase [GDP-forming] subunit beta, mitochondrial	WBGene00016844	0.318	-0.07	-0.171	0.387	0.488	0.101	up		down	up	up
P34339	egl-45	Eukaryotic translation initiation factor 3 subunit A	WBGene00001209	0.282	-0.03	0.034	0.313	0.248	-0.064	up			up	up
A5JYX5	dhs-3	Protein dhs-3	WBGene00000967	-0.622	0.221	0.324	-0.843	-0.946	-0.103	down		up	down	down
Q23146	rab-7	RAB family	WBGene00004271	-0.45	0.191	-0.001	-0.641	-0.449	0.192	down			down	down
G5ECZ0	hum-5	Heavy chain, Unconventional Myosin	WBGene00002038	-0.338	0.138	0.125	-0.476	-0.463	0.013	down			down	down
Q9XWK2	CELE_Y54E5A.5	Uncharacterized protein	WBGene00013200	0.909	0.279	0.181	0.631	0.729	0.098	up	up		up	up
Q20065	phy-2	Prolyl 4-hydroxylase subunit alpha-2	WBGene00004025	0.481	-0.034	-0.064	0.516	0.545	0.03	up			up	up
Q9XUS5	rml-1	UTP--glucose-1-phosphate uridylyltransferase	WBGene00010665	-0.265	0.209	-0.036	-0.474	-0.229	0.245	down	up		down	down	up
H9G340	mpst-3	MercaptoPyruvate SulfurTransferase homolog	WBGene00010383	-0.465	-0.035	-0.158	-0.43	-0.307	0.123	down		down	down	down
Q7Z1Q3	alh-12	Aldedh domain-containing protein	WBGene00000118	-0.343	0.229	0.351	-0.572	-0.695	-0.123	down	up	up	down	down
O16515	CELE_T05H4.10	NopRA1 domain-containing protein	WBGene00020273	1.141	0.118	0.096	1.023	1.045	0.023	up			up	up
P30625	kin-2	cAMP-dependent protein kinase regulatory subunit	WBGene00002190	-0.27	0.128	0.066	-0.398	-0.337	0.061	down			down	down
P34519	K11H3.3	Putative tricarboxylate transport protein, mitochondrial	WBGene00010780	-0.636	0.019	-0.118	-0.655	-0.518	0.137	down			down	down
O02365	mua-6	Intermediate filament protein ifa-2	WBGene00003485	0.326	-0.139	-0.219	0.465	0.545	0.08	up		down	up	up
O76407	CELE_T10B5.3	Utp12 domain-containing protein	WBGene00020389	1.109	0.208	0.101	0.901	1.008	0.108	up			up	up
Q23205	tag-267	Uncharacterized protein	WBGene00044318	1.439	0.108	-0.012	1.331	1.451	0.12	up			up	up
Q9N4B7	rpc-11	DNA-directed RNA polymerase subunit	WBGene00022309	5.295	0.575	-0.094	4.72	5.389	0.668	up			up	up
P53588	suca-1	Succinate--CoA ligase [ADP-forming] subunit beta, mitochondrial	WBGene00009812	-0.341	0.286	0.006	-0.627	-0.347	0.28	down	up		down	down	up
G5EEL9	hmg-11	HMG	WBGene00001976	-0.351	0.569	0.218	-0.92	-0.568	0.351	down	up		down	down	up
Q22505	immt-1	MICOS complex subunit MIC60-1	WBGene00020511	-0.285	-0.029	-0.057	-0.256	-0.227	0.028	down			down	down
Q2WF63	CELE_H20J04.4	RNA helicase	WBGene00019219	1.452	0.02	0.184	1.433	1.268	-0.165	up			up	up
S6FWN4	kcc-1	K+/Cl-Cotransporter	WBGene00006504	-0.185	0.17	0.145	-0.355	-0.33	0.024	down	up	up	down	down
Q95X39	mrpl-9	39S ribosomal protein L9, mitochondrial	WBGene00015025	0.555	-0.078	-0.338	0.633	0.893	0.26	up		down	up	up	up
Q10576	dpy-18	Prolyl 4-hydroxylase subunit alpha-1	WBGene00001077	0.667	0.059	-0.093	0.607	0.76	0.152	up			up	up
Q8WQC9	drp-1	Dynamin GTPase	WBGene00001093	-0.458	0.168	-0.327	-0.626	-0.131	0.494	down		down	down		up
A0A9S2	CELE_Y38F2AR.12	Hydantoinase_B domain-containing protein	WBGene00021430	-0.31	-0.004	-0.245	-0.306	-0.065	0.241	down		down	down		up
Q10664	mek-2	Dual specificity mitogen-activated protein kinase kinase mek-2	WBGene00003186	-0.345	0.095	-0.046	-0.439	-0.299	0.14	down			down	down	up
O01803	rab-11.1	Ras-related protein rab-11.1	WBGene00004274	-0.634	0.1	-0.14	-0.734	-0.494	0.24	down			down	down	up
P34462	vha-14	V-type proton ATPase subunit D	WBGene00010130	-0.393	0.071	-0.038	-0.464	-0.355	0.109	down			down	down
Q95PZ7	CELE_Y66D12A.9	Uncharacterized protein	WBGene00013435	1.132	0.411	0.542	0.721	0.59	-0.131	up	up	up	up	up
C9IY21	CELE_ZK1058.9	Uncharacterized protein	WBGene00014207	-0.334	0.116	0.04	-0.449	-0.374	0.076	down			down	down
B3CJ34	gcn-1	TOG domain-containing protein	WBGene00021697	0.295	0.005	-0.038	0.29	0.333	0.043	up			up	up
O02485	ZK1073.1	Uncharacterized protein ZK1073.1	WBGene00014213	-1.011	-0.438	-1.011	-0.573	0	0.573	down	down	down	down		up
Q21544	pycr-1	Pyrroline-5-carboxylate reductase	WBGene00010924	-0.181	0.268	0.096	-0.449	-0.277	0.172	down	up		down	down	up
O01516	CELE_F19F10.3	DUF4440 domain-containing protein	WBGene00017599	-0.369	0.358	0.152	-0.727	-0.521	0.205	down	up		down	down
Q23623	tgt-1	Queuine tRNA-ribosyltransferase catalytic subunit	WBGene00006566	1.768	0.345	0.2	1.423	1.568	0.144	up			up	up
Q20033	coa-3	Cytochrome c oxidase assembly factor 3	WBGene00018046	0.588	-0.275	-0.144	0.863	0.733	-0.131	up			up	up
Q22120	mans-3	alpha-1,2-Mannosidase	WBGene00020197	-1.78	0.113	-0.265	-1.893	-1.515	0.378	down			down	down
O62146	F09B12.3	Putative phospholipase B-like 2	WBGene00008607	-0.181	0.281	0.134	-0.462	-0.315	0.147	down	up		down	down
O01454	C03G6.5	UPF0376 protein C03G6.5	WBGene00015393	-0.542	0.577	0.251	-1.119	-0.793	0.325	down	up		down	down
Q9BL07	Y54F10AM.8	Putative phospholipase B-like 3	WBGene00021852	-0.206	0.111	0.129	-0.317	-0.335	-0.018	down	up	up	down	down
Q9XW12	Y18D10A.9	Probable cytosolic iron-sulfur protein assembly protein CIAO1 homolog	WBGene00012479	0.654	0.006	0.089	0.648	0.565	-0.083	up			up	up
Q20143	CELE_F38B6.4	Trifunctional purine biosynthetic protein adenosine-3	WBGene00018174	-0.513	0.008	-0.217	-0.522	-0.297	0.225	down		down	down	down	up
Q9XWZ2	acdh-11	Acyl-CoA dehydrogenase family member 11	WBGene00012860	-0.365	0.167	-0.045	-0.532	-0.32	0.212	down			down	down	up
G5EGU1	egl-30	EGL-30	WBGene00001196	-0.377	0.12	-0.071	-0.497	-0.306	0.191	down			down	down	up
G5EEK9	vha-5	V-type proton ATPase 116 kDa subunit a 2	WBGene00006914	-0.314	0.194	-0.029	-0.507	-0.285	0.222	down	up		down	down	up
Q23384	nit-1	CN hydrolase domain-containing protein	WBGene00014206	0.963	-0.444	0.424	1.407	0.539	-0.869	up			up	up	down
Q95QK0	CELE_F21C10.11	Uncharacterized protein	WBGene00017660	-2.53	0.539	-0.14	-3.069	-2.39	0.679	down			down	down
G5ECB4	srap-1	Serine Rich Adhesion Protein-like	WBGene00011522	-0.3	0.341	0.457	-0.641	-0.756	-0.115	down	up	up	down	down
Q21735	ran-4	Probable nuclear transport factor 2	WBGene00004305	-0.431	0.218	-0.074	-0.649	-0.356	0.292	down			down	down	up
O61196	CELE_F37C4.6	Amino_oxidase domain-containing protein	WBGene00018146	-0.395	0.067	0.034	-0.463	-0.429	0.034	down			down	down
O45815	act-5	ACTin	WBGene00000067	-0.24	0.172	0.09	-0.412	-0.33	0.082	down	up		down	down
Q17967	pdi-1	Protein disulfide-isomerase 1	WBGene00003962	0.373	-0.017	-0.07	0.39	0.443	0.053	up			up	up
Q9N363	dcap-1	mRNA-decapping enzyme 1	WBGene00021929	-0.61	0.396	0.126	-1.007	-0.736	0.27	down	up		down	down
Q9XXE2	CELE_Y44A6D.2	Uncharacterized protein	WBGene00012853	-0.461	0.544	0.083	-1.005	-0.544	0.461	down	up		down	down	up
Q21481	dhs-28	SCP2 domain-containing protein	WBGene00000991	-0.304	0.222	0.121	-0.526	-0.424	0.102	down	up		down	down
Q09422	pgam-5	Serine/threonine-protein phosphatase Pgam5, mitochondrial	WBGene00019941	0.291	-0.148	-0.072	0.439	0.362	-0.076	up			up	up
Q9XW92	vha-13	V-type proton ATPase catalytic subunit A	WBGene00013025	-0.381	0.217	-0.015	-0.598	-0.366	0.232	down	up		down	down	up
Q09475	C28H8.3	Uncharacterized helicase C28H8.3	WBGene00016194	0.281	-0.001	0.053	0.283	0.229	-0.054	up			up	up
Q19004	aagr-1	P-type domain-containing protein	WBGene00017071	-1.044	-0.241	-0.264	-0.803	-0.779	0.024	down			down	down
Q9N4L8	lpd-5	NADH dehydrogenase [ubiquinone] iron-sulfur protein 4, mitochondrial	WBGene00003061	0.413	-0.146	0.54	0.559	-0.127	-0.686	up		up	up		down
P47207	cct-2	T-complex protein 1 subunit beta	WBGene00000378	0.312	0.035	0.072	0.277	0.24	-0.037	up			up	up
Q9NAB4	gst-26	Glutathione S-Transferase	WBGene00001774	-0.548	-0.105	-0.229	-0.442	-0.318	0.124	down		down	down	down
Q4R165	CELE_Y54G2A.45	Lipase_3 domain-containing protein	WBGene00044488	-1.258	0.04	-0.485	-1.299	-0.773	0.525	down		down	down	down	up
Q22099	kars-1	Lysine--tRNA ligase	WBGene00002238	0.465	0.088	0.078	0.377	0.386	0.009	up			up	up
O62415	lys-1	Lysozyme-like protein 1	WBGene00003090	-0.785	0.025	-0.167	-0.81	-0.618	0.192	down			down	down
Q09607	gst-36	Probable glutathione S-transferase gst-36	WBGene00001784	-0.437	-0.024	-0.195	-0.413	-0.242	0.172	down		down	down	down	up
G5ECC9	mrps-27	Ig-like domain-containing protein	WBGene00010766	0.507	-0.151	0.613	0.658	-0.106	-0.764	up		up	up		down
Q9XXI3	CELE_Y17G7B.12	RNA exonuclease 4	WBGene00012465	1.869	0.32	0.124	1.549	1.745	0.196	up			up	up
Q19626	vha-12	V-type proton ATPase subunit B 1	WBGene00006921	-0.333	-0.055	-0.051	-0.278	-0.282	-0.005	down			down	down
Q9TYN2	CELE_Y37E11B.5	tRNA-dihydrouridine(47) synthase [NAD(P)(+)]	WBGene00021377	0.57	-0.081	0.134	0.65	0.436	-0.215	up			up	up
Q9XW68	CELE_Y75B8A.14	GPN-loop GTPase 3	WBGene00013550	0.946	0.235	0.195	0.711	0.751	0.04	up			up	up
G5EFZ1	ipgm-1	2,3-bisphosphoglycerate-independent phosphoglycerate mutase	WBGene00019001	-0.395	0.053	-0.356	-0.449	-0.039	0.41	down		down	down		up
G5ECX9	cdr-2	CaDmium Responsive	WBGene00008296	-0.943	-0.068	-1.201	-0.875	0.257	1.133	down		down	down	up	up
O62198	CELE_F32A11.1	Uncharacterized protein	WBGene00009307	-0.346	0.168	-0.126	-0.514	-0.22	0.294	down			down	down	up
P91374	rpl-15	60S ribosomal protein L15	WBGene00004427	0.233	-0.058	-0.024	0.291	0.257	-0.034	up			up	up
Q9XVT0	rrbs-1	Ribosome biogenesis regulatory protein homolog	WBGene00007617	1.796	0.101	0.144	1.695	1.652	-0.043	up			up	up
O01530	asp-6	Aspartic protease 6	WBGene00000219	-0.686	0.167	-0.401	-0.853	-0.285	0.568	down		down	down	down	up
P34385	F02A9.10	Probable methylcrotonoyl-CoA carboxylase beta chain, mitochondrial	WBGene00303021	-0.338	0.007	-0.164	-0.344	-0.174	0.17	down		down	down	down	up
Q8MQ23	cest-13	Carboxylic ester hydrolase	WBGene00010116	-1.043	0.009	-0.007	-1.053	-1.037	0.016	down			down	down
Q9TZL8	pfk-1.1	ATP-dependent 6-phosphofructokinase 1	WBGene00022199	-0.291	0.201	-0.011	-0.492	-0.28	0.212	down	up		down	down	up
Q18877	C56A3.5	Uncharacterized protein	WBGene00008344	0.693	-0.046	0.023	0.739	0.669	-0.07	up			up	up
O45279	dlat-2	2-oxoacid_dh domain-containing protein	WBGene00007824	-0.391	0.317	-0.166	-0.708	-0.225	0.483	down	up		down	down	up
Q18031	nnt-1	Proton-translocating NAD(P)(+) transhydrogenase	WBGene00003778	-0.84	0.039	0.25	-0.879	-1.09	-0.211	down			down	down
O18216	pno-1	RNA-binding protein pno-1	WBGene00013144	1.133	0.182	0.153	0.952	0.98	0.028	up			up	up
Q9BL73	ppk-2	PIPK domain-containing protein	WBGene00004088	-0.417	0.213	0.099	-0.63	-0.516	0.114	down			down	down
P49596	ppm-2	Probable protein phosphatase 2C T23F11.1	WBGene00011953	-0.315	0.172	0.111	-0.487	-0.427	0.061	down			down	down
O62416	lys-2	Lysozyme-like protein 2	WBGene00003091	-1.412	0.792	-0.475	-2.205	-0.937	1.267	down			down	down	up
G5EE96	slc-25a10	Mitochondrial dicarboxylate carrier	WBGene00019656	-0.243	0.253	-0.003	-0.496	-0.24	0.256	down	up		down	down	up
Q10941	ugt-46	Putative UDP-glucuronosyltransferase ugt-46	WBGene00015141	-0.483	-0.085	-0.073	-0.398	-0.41	-0.012	down			down	down
O17643	idh-2	Isocitrate dehydrogenase [NADP]	WBGene00007942	-0.347	-0.002	-0.12	-0.346	-0.228	0.118	down			down	down
Q21939	mrpl-49	Probable 39S ribosomal protein L49, mitochondrial	WBGene00011247	0.434	-0.062	-0.363	0.496	0.797	0.301	up		down	up	up	up
Q7YX52	mrpl-53	Mitochondrial Ribosomal Protein, Large	WBGene00008459	0.492	-0.103	-0.422	0.595	0.914	0.319	up		down	up	up	up
Q9TYL2	CELE_Y25C1A.13	Uncharacterized protein	WBGene00021296	-0.409	0.063	-0.278	-0.473	-0.132	0.341	down		down	down		up
Q95QU1	C27F2.9	JmjC domain-containing protein	WBGene00043156	0.587	-0.165	-0.117	0.752	0.704	-0.048	up			up	up
P52899	T05H10.6	Probable pyruvate dehydrogenase E1 component subunit alpha, mitochondrial	WBGene00011510	-0.268	0.098	-0.09	-0.366	-0.178	0.188	down			down	down	up
Q95QR7	C39D10.8	DUF4440 domain-containing protein	WBGene00016535	-0.469	0.217	0.098	-0.686	-0.567	0.119	down			down	down
Q21018	cri-3	Conserved regulator of innate immunity protein 3	WBGene00010303	0.464	-0.054	-0.397	0.518	0.861	0.342	up		down	up	up	up
Q27487	ctl-2	Peroxisomal catalase 1	WBGene00000831	-0.296	0.373	0.508	-0.669	-0.804	-0.135	down	up	up	down	down
Q18607	chil-10	Glyco_hydro_18 domain-containing protein	WBGene00016642	-0.541	-0.086	-0.17	-0.455	-0.371	0.084	down		down	down	down
P21137	kin-1	cAMP-dependent protein kinase catalytic subunit	WBGene00002189	-0.366	0.06	-0.004	-0.426	-0.363	0.063	down			down	down
Q9U2A9	Y48B6A.1	Ribosome biogenesis protein BOP1 homolog	WBGene00012978	1.21	0.323	0.198	0.886	1.012	0.126	up			up	up
O44568	W03F8.3	Probable peptide chain release factor 1, mitochondrial	WBGene00020993	0.922	0.008	-0.159	0.914	1.081	0.167	up			up	up
O45552	acaa-2	ACetyl-CoA Acyltransferase 2 homolog	WBGene00009952	-0.328	0.131	-0.18	-0.459	-0.148	0.311	down		down	down	down	up
Q9GYQ6	C49H3.3	Uncharacterized protein	WBGene00016790	1.702	0.275	-0.072	1.428	1.774	0.346	up			up	up
O62518	ZK795.3	Brix domain-containing protein ZK795.3	WBGene00014083	1.513	0.182	0.166	1.331	1.348	0.016	up			up	up
B3WFW5	CELE_ZK858.6	Transmembrane 9 superfamily member	WBGene00014119	-0.306	0.094	0.093	-0.4	-0.399	0.001	down			down	down
Q17499	B0395.3	Carn_acyltransf domain-containing protein	WBGene00007175	-0.606	0.07	0.212	-0.675	-0.817	-0.142	down			down	down
O61818	mrps-30	Mitochondrial Ribosomal Protein, Small	WBGene00044321	0.368	0	-0.229	0.368	0.596	0.228	up		down	up	up	up
O44991	lpd-6	Brix domain-containing protein	WBGene00003062	1.691	0.238	0.272	1.453	1.419	-0.034	up			up	up
Q9XUF9	C49C3.4	Uncharacterized protein	WBGene00008194	-0.632	0.044	-0.318	-0.676	-0.314	0.362	down		down	down	down	up
O45293	gly-8	Probable N-acetylgalactosaminyltransferase 8	WBGene00001633	0.514	0.117	0.101	0.397	0.413	0.016	up			up	up
P34714	ost-1	SPARC	WBGene00003893	0.099	-0.477	-0.292	0.576	0.391	-0.185		down	down	up	up
Q9U3P9	alkb-8	Alkylated DNA repair protein alkB homolog 8	WBGene00007581	0.767	0.044	-0.004	0.723	0.771	0.048	up			up	up
G5EBK3	erm-1	Moesin/ezrin/radixin homolog 1	WBGene00001333	-0.25	-0.003	-0.007	-0.247	-0.243	0.004	down			down	down
K8ESM2	CELE_Y16B4A.2	Carboxypeptidase	WBGene00012445	-0.382	0.242	0.115	-0.623	-0.497	0.127	down	up		down	down
P91134	adss-1	Adenylosuccinate synthetase	WBGene00016509	-0.114	0.104	0.04	-0.218	-0.154	0.065	down	up		down	down
Q9U2M9	CELE_Y37H9A.1	Uncharacterized protein	WBGene00012576	1.938	-0.033	0.048	1.972	1.89	-0.081	up			up	up
Q9U3Q0	mrps-22	Mitochondrial Ribosomal Protein, Small	WBGene00007564	0.485	-0.03	0.961	0.515	-0.476	-0.99	up		up	up	down	down
Q20062	marb-1	Isochorismatase domain-containing protein	WBGene00009436	-0.33	0.151	-0.207	-0.481	-0.123	0.358	down		down	down		up
P90735	eat-6	Sodium/potassium-transporting ATPase subunit alpha	WBGene00001137	-0.197	0.244	0.11	-0.441	-0.307	0.134	down	up		down	down
Q20641	nmy-1	Non-muscle MYosin	WBGene00003776	-0.637	-0.284	-0.201	-0.352	-0.435	-0.083	down	down	down	down	down
P91500	nmrk-1	Molybdopterin synthase catalytic subunit	WBGene00020842	-0.577	-0.068	-0.158	-0.509	-0.419	0.09	down			down	down
P46577	gop-2	GPN-loop GTPase 1	WBGene00001661	0.769	0.192	0.114	0.577	0.654	0.077	up			up	up
Q10123	F52C9.3	Uncharacterized protein F52C9.3	WBGene00018674	0.516	-0.006	-0.307	0.521	0.823	0.302	up		down	up	up	up
Q23525	ZK546.14	Uncharacterized protein ZK546.14	WBGene00022765	1.813	0.104	0.093	1.709	1.72	0.011	up			up	up
G4SI07	gei-15	GEX Interacting protein	WBGene00001572	-0.366	0.013	0.112	-0.379	-0.478	-0.099	down			down	down
Q20720	CELE_F53F4.11	Uncharacterized protein	WBGene00009993	1.161	0.311	0.209	0.849	0.952	0.103	up			up	up
Q21832	rnp-4	RNA-binding protein rnp-4	WBGene00004387	0.417	-0.081	-0.004	0.498	0.421	-0.076	up			up	up
Q9N4G7	Y71F9B.2	Phosphatidate cytidylyltransferase, mitochondrial	WBGene00022126	-0.353	0.108	-0.208	-0.461	-0.145	0.316	down		down	down	down	up
O01757	nath-10	RNA cytidine acetyltransferase	WBGene00018866	1.276	0.256	0.182	1.02	1.094	0.074	up			up	up
P34496	mtss-1	Single-stranded DNA-binding protein, mitochondrial	WBGene00019800	0.873	0.205	-0.373	0.667	1.246	0.578	up		down	up	up	up
Q19853	CELE_F28B4.3	Uncharacterized protein	WBGene00017892	-0.432	-0.052	0.112	-0.38	-0.544	-0.164	down			down	down	down
Q20177	CELE_F38E9.1	Uncharacterized protein	WBGene00018184	-0.906	-0.193	-0.216	-0.713	-0.689	0.023	down			down	down
Q17632	dis-3	Probable exosome complex exonuclease RRP44	WBGene00001001	0.614	0.133	0.022	0.481	0.592	0.111	up			up	up
Q9N3T3	CELE_Y47G6A.9	Uncharacterized protein	WBGene00021638	1.49	-0.043	0.213	1.533	1.277	-0.256	up			up	up
Q93540	slc-25a18.1	SLC (SoLute Carrier) homolog	WBGene00008979	-0.445	-0.049	-0.076	-0.396	-0.369	0.028	down			down	down
G5EFH0	CELE_W09C5.1	Ribosome biogenesis protein NSA2 homolog	WBGene00012351	0.741	0.205	0.137	0.536	0.604	0.068	up			up	up
Q9N4A5	hxk-3	Phosphotransferase	WBGene00022306	-0.248	0.073	0.046	-0.32	-0.293	0.027	down			down	down
O18199	mrpl-37	Mitochondrial Ribosomal Protein, Large	WBGene00013004	0.425	-0.184	-0.385	0.609	0.811	0.202	up		down	up	up
Q9TYS8	calu-2	CALUmenin (Calcium-binding protein) homolog	WBGene00017240	-0.489	0.124	-0.088	-0.613	-0.401	0.212	down			down	down
Q17941	akt-1	Serine/threonine-protein kinase akt-1	WBGene00000102	-0.329	0.167	0.223	-0.497	-0.552	-0.055	down		up	down	down
G5EC10	lec-9	Galectin	WBGene00002272	-0.417	0.271	0.089	-0.688	-0.506	0.182	down			down	down
Q20790	CELE_F54F7.3	Uncharacterized protein	WBGene00010065	-2.066	-0.315	-1.155	-1.751	-0.911	0.84	down		down	down	down	up
O01497	tyr-4	TYRosinase	WBGene00016419	0.599	-0.256	-0.037	0.855	0.636	-0.219	up			up	up
G5EBN9	snf-3	Sodium- and chloride-dependent betaine transporter	WBGene00004902	-0.349	0.221	-0.06	-0.57	-0.29	0.28	down			down	down	up
A0A0K3AQN5	pgp-2	p-GlycoProtein related	WBGene00003996	-0.479	0.1	0.093	-0.579	-0.571	0.007	down			down	down
Q9XVS7	nxf-1	Nuclear RNA export factor 1	WBGene00003834	0.534	0.053	0.243	0.481	0.291	-0.19	up		up	up	up	down
Q93641	sac-1	SAC domain-containing protein	WBGene00009264	-0.344	0.137	-0.053	-0.481	-0.291	0.19	down			down	down	up
Q21067	ifc-2	Intermediate filament protein ifc-2	WBGene00002056	-0.281	0.187	0.046	-0.468	-0.327	0.141	down	up		down	down
Q20628	cdd-2	Cytidine deaminase	WBGene00000392	-0.771	0.298	-0.592	-1.07	-0.179	0.891	down		down	down		up
O16259	sti-1	Stress-induced-phosphoprotein 1	WBGene00019983	0.378	0.042	0.062	0.335	0.316	-0.019	up			up	up
O76463	nft-1	Nitrilase and fragile histidine triad fusion protein NitFhit	WBGene00003594	-0.354	-0.02	-0.324	-0.335	-0.03	0.304	down		down	down		up
C0VXV6	mrpl-46	Nudix hydrolase domain-containing protein	WBGene00021935	0.581	-0.016	-0.373	0.597	0.954	0.357	up		down	up	up	up
Q22623	mrpl-50	39S ribosomal protein L50, mitochondrial	WBGene00011883	0.448	-0.102	-0.358	0.55	0.806	0.256	up		down	up	up	up
Q0G840	CELE_M106.3	Prostaglandin reductase 2	WBGene00010911	-0.72	0.441	0.023	-1.162	-0.743	0.418	down			down	down
Q9NAG2	mrpl-20	Mitochondrial Ribosomal Protein, Large	WBGene00012992	0.45	-0.121	-0.292	0.571	0.742	0.171	up		down	up	up
O01302	cest-1.1	Carboxylic ester hydrolase	WBGene00011362	-0.803	0.5	0.64	-1.302	-1.442	-0.14	down		up	down	down
Q23645	rpc-25	RNA Polymerase, Class III (C)	WBGene00014111	0.834	-0.034	0.033	0.868	0.801	-0.067	up			up	up
O44955	C34B2.8	NADH dehydrogenase [ubiquinone] 1 alpha subcomplex subunit 13	WBGene00016393	0.742	-0.068	0.58	0.81	0.162	-0.648	up		up	up		down
G5EBF0	glo-1	Ras-related protein Rab	WBGene00011083	-0.605	0.046	0.23	-0.651	-0.835	-0.184	down			down	down
P04255;Q27484;Q27876;Q27894	his-44	Histone H2B 1;Probable histone H2B 3;Probable histone H2B 4;Histone H2B 2	WBGene00001918;WBGene00001908;WBGene00001903;WBGene00001885;WBGene00001889	-0.24	0.41	0.203	-0.65	-0.443	0.207	down	up		down	down
Q95X18	CELE_F52C12.2	18S rRNA aminocarboxypropyltransferase	WBGene00018679	1.068	-0.037	0.183	1.105	0.885	-0.22	up			up	up
Q19826	rpb-8	Probable DNA-directed RNA polymerases I, II, and III subunit RPABC3	WBGene00017830	0.738	0.085	0.098	0.653	0.64	-0.013	up			up	up
P53585	acly-1	Probable ATP-citrate synthase	WBGene00016995	-0.448	-0.052	0.076	-0.396	-0.524	-0.128	down			down	down
Q8TA47	CELE_Y51F10.7	Uncharacterized protein	WBGene00021768	-0.811	-0.116	-0.073	-0.695	-0.738	-0.043	down			down	down
A8WHT1	C53A5.17	tRNA (guanine(37)-N1)-methyltransferase	WBGene00194707	1.367	0.124	0.005	1.243	1.361	0.119	up			up	up
G5EBG4	clec-209	C-type lectin domain-containing protein	WBGene00018910;WBGene00021224	-2.396	-0.046	-0.963	-2.35	-1.432	0.917	down		down	down	down	up
Q19133	CELE_F07A11.5	Ribokinase	WBGene00008548	-0.333	0.07	0.094	-0.404	-0.427	-0.023	down			down	down
P0DM41;P0DM42	act-1	Actin-1;Actin-3	WBGene00000063	-0.214	0.279	0.038	-0.493	-0.252	0.241	down	up		down	down	up
Q8ITX4	clec-67	C-type lectin domain-containing protein	WBGene00018971	-0.969	0.46	-0.206	-1.429	-0.763	0.666	down			down	down	up
A0A131MBU3	irg-7	Protein irg-7	WBGene00018237	-0.499	-0.03	-0.033	-0.469	-0.466	0.003	down			down	down
Q17543	C01B10.3	Uncharacterized protein	WBGene00015278	0.386	0.047	-0.013	0.339	0.398	0.06	up			up	up
Q9BL43	cest-25	COesterase domain-containing protein	WBGene00022178	-0.474	0.135	0.24	-0.609	-0.714	-0.105	down		up	down	down
Q23044	CELE_T22B7.7	HotDog ACOT-type domain-containing protein	WBGene00020674	-0.528	0.141	-0.089	-0.669	-0.439	0.23	down			down	down
P62784	his-67	Histone H4	WBGene00001920;WBGene00001911;WBGene00001924;WBGene00001905;WBGene00001938;WBGene00001879;WBGene00001930;WBGene00001934;WBGene00001912;WBGene00001892;WBGene00001902;WBGene00001875;WBGene00001941;WBGene00001900;WBGene00001884;WBGene00001888	-0.446	0.454	0.172	-0.9	-0.619	0.281	down	up		down	down
Q9N4P2	glrx-21	Glutaredoxin domain-containing protein	WBGene00022663	-0.284	0.359	-0.143	-0.643	-0.141	0.501	down	up		down		up
O01614	ugt-12	Glucuronosyltransferase	WBGene00020592	0.211	-0.215	-0.212	0.426	0.423	-0.003	up	down	down	up	up
Q23098	nuo-6	NADH dehydrogenase [ubiquinone] 1 beta subcomplex subunit 4	WBGene00012166	0.54	-0.093	0.763	0.634	-0.223	-0.856	up		up	up	down	down
O45781	drr-2	RRM domain-containing protein	WBGene00011730	0.565	-0.042	-0.126	0.606	0.691	0.085	up			up	up
Q95Q60	fkb-5	Peptidylprolyl isomerase	WBGene00001430	0.681	0.211	0.003	0.47	0.678	0.208	up	up		up	up	up
Q9TZS5	cct-7	T-complex protein 1 subunit eta	WBGene00020391	0.361	0.051	0.056	0.31	0.305	-0.004	up			up	up
Q20760	CELE_F54C9.9	Protein KRI1 homolog	WBGene00010044	1.399	0.316	0.22	1.083	1.179	0.096	up			up	up
A0A4V0IJI7	lron-7	LRRCT domain-containing protein	WBGene00019351	-0.312	0.027	0.075	-0.339	-0.387	-0.048	down			down	down
H2KZV5	CELE_T21H3.1	Lipase_3 domain-containing protein	WBGene00020662	-1.07	0.119	-0.665	-1.189	-0.406	0.783	down		down	down	down	up
Q95QL3	rbm-34	RNA Binding Motif protein homolog	WBGene00008688	1.469	0.551	0.467	0.918	1.002	0.084	up	up	up	up	up
Q17437	B0035.13	Lipase_3 domain-containing protein	WBGene00007112	-0.872	-0.011	-0.297	-0.861	-0.575	0.286	down			down	down
Q86DC6	ifd-1	Intermediate filament protein ifd-1	WBGene00002057	-0.306	0.028	0.097	-0.334	-0.404	-0.07	down			down	down
Q9XVU3	atgp-1	Alpha-glucosidase	WBGene00000224	-0.399	0.082	0.179	-0.481	-0.579	-0.098	down			down	down
O44923	CELE_W10G11.19	Uncharacterized protein	WBGene00021148	-0.548	0.032	-0.015	-0.58	-0.533	0.048	down			down	down
H2KYQ3	C12D12.1	Uncharacterized protein	WBGene00015713	-0.441	0.364	0.064	-0.804	-0.505	0.299	down	up		down	down
Q19311	pfas-1	Probable phosphoribosylformylglycinamidine synthase	WBGene00008654	-0.34	0.053	0.003	-0.392	-0.343	0.049	down			down	down
Q9XVR6	otub-1	Ubiquitin thioesterase otubain-like	WBGene00007718	-0.506	0.177	-0.133	-0.683	-0.373	0.31	down			down	down	up
Q23629	ogdh-2	Probable 2-oxoglutarate dehydrogenase E1 component DHKTD1 homolog, mitochondrial	WBGene00014098	0.156	-0.249	-0.111	0.405	0.267	-0.138	up	down		up	up
A0A4V6M3U0	eps-8	SH3 domain-containing protein	WBGene00001330	-0.2	0.148	0.123	-0.348	-0.323	0.025	down	up		down	down
B7WNA0	pyk-1	Pyruvate kinase	WBGene00009126	-0.369	0.023	0	-0.391	-0.369	0.023	down			down	down
Q95QC2	CELE_R02F2.9	RF_PROK_I domain-containing protein	WBGene00019838	0.597	0.133	-0.302	0.464	0.899	0.435	up		down	up	up	up
Q9XWM1	oig-2	Ig-like domain-containing protein	WBGene00003860	-0.382	0.236	-0.017	-0.617	-0.365	0.253	down			down	down	up
Q9UAQ6	rab-1	RAB family	WBGene00004266	-0.402	0.306	0.118	-0.707	-0.519	0.188	down	up		down	down
Q19223	irg-4	CUB_2 domain-containing protein	WBGene00008584	-0.065	1.803	0.644	-1.869	-0.709	1.159		up		down	down	up
Q95YD5	vha-16	V-type proton ATPase subunit	WBGene00016258	-0.366	0.075	-0.024	-0.441	-0.342	0.099	down			down	down
O18256	CELE_Y7A9A.1	Uncharacterized protein	WBGene00012416	-0.46	0.342	-0.058	-0.802	-0.402	0.4	down	up		down	down	up
Q4W5P0	sqd-1	Homologous to Drosophila SQD (Squid) protein	WBGene00022235	0.506	0.018	0.012	0.488	0.495	0.007	up			up	up
O45443	clec-65	C-type LECtin	WBGene00009396	-0.796	-0.092	-0.351	-0.704	-0.444	0.259	down		down	down	down
Q27527	enol-1	Enolase	WBGene00011884	-0.337	0.182	-0.21	-0.519	-0.127	0.392	down		down	down		up
Q23651	elpc-3	Elongator complex protein 3	WBGene00014123	0.686	0.03	0.006	0.657	0.681	0.024	up			up	up
Q18036	C16A3.5	NADH dehydrogenase [ubiquinone] 1 beta subcomplex subunit 9	WBGene00015810	0.5	-0.036	0.734	0.536	-0.234	-0.77	up		up	up	down	down
Q20679	let-268	Multifunctional procollagen lysine hydroxylase and glycosyltransferase	WBGene00002497	0.326	-0.035	-0.122	0.361	0.448	0.087	up			up	up
Q22017	flad-1	Probable FAD synthase	WBGene00011271	-0.367	0.192	-0.099	-0.559	-0.269	0.291	down			down	down	up
Q9XW16	pfn-1	Profilin-1	WBGene00003989	0.02	-0.334	-0.222	0.354	0.242	-0.112		down	down	up	up
Q95ZW9	C50F4.16	Nudix hydrolase domain-containing protein	WBGene00008238	-0.34	0.043	-0.273	-0.383	-0.067	0.316	down		down	down		up
O44511	sph-1	MARVEL domain-containing protein	WBGene00004979	-0.509	0.305	0.082	-0.814	-0.591	0.222	down			down	down
Q17780	C07D10.5	Uncharacterized protein	WBGene00015569	-0.658	0.074	-0.042	-0.732	-0.615	0.117	down			down	down
Q9TYW7	grd-3	Ground-like domain-containing protein	WBGene00001692	-0.61	-0.005	0.09	-0.605	-0.7	-0.095	down			down	down
Q09603	ech-4	ACB domain-containing protein	WBGene00001153	-0.314	0.073	-0.102	-0.387	-0.211	0.175	down			down	down	up
Q9N408	ddp-1	Mitochondrial import inner membrane translocase subunit Tim8	WBGene00000941	0.374	-0.098	-0.151	0.472	0.526	0.053	up			up	up
P90731	acly-2	ATP-citrate synthase	WBGene00007150	-0.357	-0.007	0.037	-0.35	-0.394	-0.045	down			down	down
H2L2A8	CELE_F19B6.1	Uridine kinase	WBGene00008948	0.4	-0.061	0.115	0.462	0.285	-0.177	up			up	up
Q9BL56	CELE_Y65B4A.8	CTP_transf_like domain-containing protein	WBGene00022031	-0.231	0.141	-0.026	-0.372	-0.205	0.167	down			down	down	up
M1ZJ62	pud-4	PUD1_2 domain-containing protein	WBGene00017498	-0.444	1.611	2.605	-2.055	-3.049	-0.995		up	up	down	down	down
Q94271	asp-14	Peptidase A1 domain-containing protein	WBGene00019619	-0.048	1.398	0.009	-1.446	-0.057	1.389		up		down		up
Q9TYM6	Y48A5A.1	Protein SHQ1 homolog	WBGene00021655	0.703	-0.008	0.041	0.711	0.662	-0.049	up			up	up
Q23315	ears-1	Glutamate--tRNA ligase	WBGene00001337	0.355	0.078	-0.001	0.277	0.356	0.079	up			up	up
Q09522	E02H1.1	Probable dimethyladenosine transferase	WBGene00008455	1.281	0.047	0.153	1.234	1.128	-0.106	up			up	up
Q23236	ndx-3	Nudix hydrolase 3	WBGene00003580	-0.707	0.474	-0.024	-1.181	-0.683	0.498	down			down	down	up
P34280	C02F5.3	Uncharacterized GTP-binding protein C02F5.3	WBGene00015346	0.607	0.159	0.082	0.448	0.525	0.077	up			up	up
Q9XUY5	nkb-3	Probable sodium/potassium-transporting ATPase subunit beta-3	WBGene00010117	-0.266	0.222	0.136	-0.488	-0.402	0.086	down	up		down	down
Q21465	zig-12	Ig-like domain-containing protein	WBGene00019727	-0.178	0.429	0.066	-0.607	-0.244	0.363		up		down	down	up
O44857	nep-2	Neprilysin-2	WBGene00020230	-0.465	0.162	0.037	-0.627	-0.501	0.125	down			down	down
O02328	eif-3.C	Eukaryotic translation initiation factor 3 subunit C	WBGene00001226	0.282	0.007	0.038	0.274	0.243	-0.031	up			up	up
Q93714	idha-1	Probable isocitrate dehydrogenase [NAD] subunit alpha, mitochondrial	WBGene00009664	-0.347	0.221	-0.035	-0.568	-0.312	0.256	down			down	down	up
Q27492	rpc-2	DNA-directed RNA polymerase subunit beta	WBGene00017300	0.688	0.103	0.139	0.585	0.549	-0.036	up			up	up
P91136	C37H5.5	Nucleolar complex protein 3 homolog	WBGene00016508	1.029	0.005	0.118	1.024	0.912	-0.112	up			up	up
Q20939	F57B9.1	Putative pyridoxamine 5'-phosphate oxidase	WBGene00018996	-0.346	0.081	-0.129	-0.427	-0.217	0.21	down			down	down	up
Q9GYT5	arrd-18	Arrestin_C domain-containing protein	WBGene00018060	0.53	-0.098	0.076	0.628	0.454	-0.174	up			up	up
Q9N3G0	CELE_Y53G8AR.6	SAP domain-containing protein	WBGene00021813	0.491	0.091	0.145	0.399	0.346	-0.053	up			up	up
O18196	noa-1	G domain-containing protein	WBGene00013001	0.81	-0.135	-0.09	0.945	0.9	-0.045	up			up	up
Q95Q95	let-363	Target of rapamycin homolog	WBGene00002583	-0.318	0.115	0.056	-0.433	-0.374	0.059	down			down	down
G5EET8	pud-1.2	PUD1_2 domain-containing protein	WBGene00017499;WBGene00021236	-0.145	1.755	2.145	-1.899	-2.289	-0.39		up	up	down	down
Q9TZE4	CELE_W04C9.4	Uncharacterized protein	WBGene00021026	1.698	0.207	0.04	1.491	1.658	0.167	up			up	up
G5EDM4	nrfl-1	Na(+)/H(+) exchange regulatory cofactor-like protein nrfl-1	WBGene00006438	-0.243	0.003	0.12	-0.246	-0.363	-0.117	down		up	down	down	down
P51875	goa-1	Guanine nucleotide-binding protein G(o) subunit alpha	WBGene00001648	-0.246	0.047	0.067	-0.293	-0.313	-0.02	down			down	down
Q20637	CELE_F52A8.1	Uncharacterized protein	WBGene00009915	-1.483	1.179	-0.377	-2.662	-1.106	1.556	down	up		down	down	up
Q20711	CELE_F53B3.6	Uncharacterized protein	WBGene00018744	-0.349	0.237	0.072	-0.587	-0.421	0.165	down			down	down
Q8MXT1	prdx-6	Thioredoxin domain-containing protein	WBGene00021401	0.315	-0.155	-0.133	0.471	0.449	-0.022	up			up	up
Q4R169	CELE_Y54G2A.41	Uncharacterized protein	WBGene00044485	-0.514	0.451	0.333	-0.965	-0.847	0.118	down	up		down	down
Q93615	F27D4.1	Probable electron transfer flavoprotein subunit alpha, mitochondrial	WBGene00009187	-0.269	0.127	-0.278	-0.396	0.009	0.405	down		down	down		up
O01761	unc-89	Muscle M-line assembly protein unc-89	WBGene00006820	-0.106	0.155	0.098	-0.261	-0.203	0.057	down	up		down	down
B3WFV9	abts-1	Anion exchange protein	WBGene00009920	-0.263	0.016	-0.056	-0.279	-0.207	0.072	down			down	down
Q10033	F15G9.1	Uncharacterized protein F15G9.1	WBGene00008865	-0.669	-0.19	-0.38	-0.48	-0.289	0.191	down		down	down	down
G5EGP4	vha-6	V-type proton ATPase 116 kDa subunit a 3	WBGene00006915	-0.376	0.007	-0.065	-0.383	-0.311	0.072	down			down	down
Q21926	iars-1	Isoleucine--tRNA ligase, cytoplasmic	WBGene00002152	0.104	-0.123	-0.177	0.228	0.281	0.053	up	down	down	up	up
Q688C0	mrps-24	28S ribosomal protein S24, mitochondrial	WBGene00023487	0.419	-0.131	0.337	0.55	0.082	-0.468	up		up	up		down
Q18136	cal-5	CALmodulin related genes	WBGene00006861	-0.567	0.509	0.049	-1.076	-0.617	0.46	down	up		down	down	up
Q9XXC8	Y48A6B.9	Enoyl-[acyl-carrier-protein] reductase, mitochondrial	WBGene00012970	-0.545	0.089	-0.008	-0.634	-0.536	0.098	down			down	down
Q9XWJ5	CELE_Y51H1A.3	Uncharacterized protein	WBGene00013094	0.491	-0.108	0.791	0.599	-0.3	-0.899	up		up	up	down	down
G5EFS2	msi-1	MuSashI (Fly neural) family	WBGene00003423	-0.372	0.111	0.04	-0.483	-0.412	0.071	down			down	down
G5EEM9	ipla-1	Intracellular phospholipase A1	WBGene00019747	-0.353	0.042	0.061	-0.395	-0.414	-0.019	down			down	down
Q19048	mrp-3	Uncharacterized protein	WBGene00003409	-0.281	0.132	0.172	-0.413	-0.454	-0.04	down			down	down
Q19286	ifb-2	Intermediate filament protein ifb-2	WBGene00002054	-0.222	0.171	0.059	-0.393	-0.281	0.112	down			down	down
O16264	F40A3.3	Phosphatidylethanolamine-binding protein homolog F40A3.3	WBGene00018218	-0.183	0.142	0.081	-0.325	-0.265	0.061	down			down	down
O18000	pes-9	M20_dimer domain-containing protein	WBGene00003982	-0.23	0.064	-0.122	-0.294	-0.108	0.186	down			down	down	up
C7FZU5	tspo-1	TranSlocator PrOtein homolog	WBGene00077771	-0.365	0.137	-0.322	-0.502	-0.043	0.46	down		down	down		up
Q19789	CELE_F25H8.1	tRNA methyltransferase 10 homolog A	WBGene00009131	0.985	0.103	0.147	0.883	0.838	-0.045	up			up	up
Q23621	gdh-1	Glutamate dehydrogenase	WBGene00014095	-0.326	-0.002	-0.29	-0.324	-0.035	0.288	down		down	down		up
Q5DX48	sax-2	Sensory AXon guidance	WBGene00004728	-0.342	0.361	0.044	-0.703	-0.386	0.317	down	up		down	down	up
Q9TXT9	bcmo-2	Beta-Carotene 15,15'-MonoOxygenase	WBGene00018755	-0.619	-0.131	-0.005	-0.488	-0.614	-0.126	down			down	down
Q23119	CELE_W02B12.1	Lipase_GDSL domain-containing protein	WBGene00012201	-0.502	0.405	0.15	-0.906	-0.652	0.254	down			down	down
Q21662	CELE_R03E9.2	Glyco_hydro_63 domain-containing protein	WBGene00019843	0.459	0.043	0.045	0.416	0.414	-0.002	up			up	up
Q95X83	rpoa-49	RNA POlymerase I (A) subunit	WBGene00017749	1.051	0.17	0.159	0.881	0.891	0.011	up			up	up
Q93831	CELE_F59C6.5	NADH dehydrogenase [ubiquinone] 1 beta subcomplex subunit 10	WBGene00010326	0.483	0	0.668	0.483	-0.185	-0.668	up		up	up	down	down
Q17399	ugt-49	UDP-glucuronosyltransferase	WBGene00007070	-0.622	-0.257	-0.177	-0.365	-0.445	-0.079	down	down	down	down	down
Q09545	sdhb-1	Succinate dehydrogenase [ubiquinone] iron-sulfur subunit, mitochondrial	WBGene00006433	-0.17	0.177	-0.059	-0.347	-0.111	0.235	down	up		down		up
H2KYZ7	frm-4	FERM domain-containing protein	WBGene00001491	-0.559	0.043	0.17	-0.603	-0.729	-0.127	down			down	down
G5EF99	CELE_ZK1128.7	SHSP domain-containing protein	WBGene00014233	-0.509	0.068	-0.084	-0.577	-0.424	0.153	down			down	down
F5GUH2	CELE_W05B5.1	Uncharacterized protein	WBGene00012274	-0.346	0.152	0.04	-0.498	-0.386	0.112	down			down	down
Q9TYJ8	mrpl-55	Mitochondrial Ribosomal Protein, Large	WBGene00022045	1.7	-0.155	-0.125	1.855	1.826	-0.03	up			up	up
Q10121	C23G10.2	RutC family protein C23G10.2	WBGene00016011	-0.453	0.171	0.128	-0.624	-0.582	0.043	down			down	down
Q8IG68	lpd-2	LiPid Depleted	WBGene00003059	1.481	0.23	0.324	1.251	1.158	-0.093	up			up	up
Q21603	ugt-62	UDP-glucuronosyltransferase	WBGene00010904	-1.026	-0.279	-1.816	-0.747	0.79	1.537	down		down	down	up	up
Q5WRN3	M142.8	Protein-lysine N-methyltransferase M142.8	WBGene00043057	0.804	-0.065	0.073	0.869	0.731	-0.138	up			up	up
Q9XWE1	dnj-27	DnaJ homolog subfamily C member 10	WBGene00001045	0.387	-0.115	-0.004	0.502	0.391	-0.111	up			up	up
Q93874	rab-14	Ras-related protein Rab-14	WBGene00004276	-0.562	0.122	0.065	-0.684	-0.627	0.057	down			down	down
P91013	dhs-1	DeHydrogenases, Short chain	WBGene00000965	-0.795	0.491	-0.031	-1.286	-0.763	0.523	down			down	down
P90980	pkc-2	Protein kinase C-like 2	WBGene00004033	-0.5	-0.081	-0.025	-0.419	-0.475	-0.056	down			down	down
Q95QQ4	atic-1	Bifunctional purine biosynthesis protein ATIC	WBGene00016957	-0.342	0.031	-0.02	-0.372	-0.321	0.051	down			down	down
Q9N5U1	pygl-1	Alpha-1,4 glucan phosphorylase	WBGene00020696	-0.093	0.171	0.113	-0.263	-0.206	0.057		up		down	down
A8WFK6	gpx-7	Glutathione peroxidase	WBGene00019846	-1.014	-0.054	-0.666	-0.961	-0.349	0.612	down		down	down	down	up
Q21966	asp-4	Aspartic protease 4	WBGene00000217	-0.503	0.064	0.333	-0.567	-0.836	-0.269	down		up	down	down	down
P52554	pfd-6	Probable prefoldin subunit 6	WBGene00009004	0.28	-0.072	0.023	0.352	0.257	-0.094	up			up	up
O17525	CELE_W02D7.4	Uncharacterized protein	WBGene00020940	-0.689	0.238	-0.284	-0.926	-0.405	0.521	down			down	down	up
O16521	hpo-19	NADH-cytochrome b5 reductase	WBGene00020268	-0.381	-0.058	-0.099	-0.323	-0.282	0.04	down			down	down
G5ED07	pdi-3	Protein disulfide-isomerase	WBGene00003964	0.279	0.007	0.011	0.272	0.267	-0.005	up			up	up
Q9Y041	hgo-1	Homogentisate 1,2-dioxygenase	WBGene00001843	-0.174	0.047	0.057	-0.221	-0.231	-0.01	down			down	down
Q9XWK5	CELE_Y48A6C.4	Ipi1_N domain-containing protein	WBGene00012977	1.41	0.208	-0.062	1.202	1.472	0.27	up			up	up
Q9XUL7	clec-50	C-type LECtin	WBGene00012253	-0.746	-0.11	-0.298	-0.636	-0.449	0.188	down		down	down	down
G5EBF4	lgmn-1	Legumain	WBGene00012144	-0.835	-0.065	0.015	-0.77	-0.849	-0.08	down			down	down
O17328	mct-6	MFS domain-containing protein	WBGene00015676	-0.609	-0.084	-0.19	-0.525	-0.419	0.106	down			down	down
Q21918	rfk-1	Riboflavin kinase	WBGene00011224	0.434	-0.056	-0.111	0.49	0.545	0.055	up			up	up
Q94010	CELE_T08G11.1	Uncharacterized protein	WBGene00011629	-0.322	0.016	0.014	-0.339	-0.336	0.002	down			down	down
Q20483	gakh-1	Protein kinase domain-containing protein	WBGene00018516	1.067	-0.111	-0.059	1.179	1.126	-0.053	up			up	up
Q9N384	lec-6	Galectin	WBGene00002269	-0.445	0.379	0.047	-0.824	-0.492	0.332	down			down	down
P91917	ola-1	Obg-like ATPase 1	WBGene00012344	0.325	0.083	0.06	0.242	0.264	0.022	up			up	up
Q23680	vha-9	Probable V-type proton ATPase subunit F	WBGene00006918	-0.461	0.257	0.005	-0.718	-0.466	0.252	down			down	down
P34650	ZK632.4	Probable mannose-6-phosphate isomerase	WBGene00014013	-0.348	-0.063	-0.02	-0.286	-0.329	-0.043	down			down	down
Q20696	F53B1.2	Sphingomyelin synthase-related 1	WBGene00018735	-0.495	0.177	0.145	-0.671	-0.64	0.031	down			down	down
Q65ZI3	dhs-30	DeHydrogenases, Short chain	WBGene00000993	-0.635	-0.069	-0.172	-0.565	-0.462	0.103	down			down	down
O76409	CELE_T10B5.7	Lipase_3 domain-containing protein	WBGene00020393	-0.583	0.189	-0.083	-0.772	-0.5	0.272	down			down	down
Q18678	sars-1	Probable serine--tRNA ligase, cytoplasmic	WBGene00005663	0.484	0.163	0.026	0.321	0.458	0.137	up	up		up	up
Q21614	cah-4	Alpha-carbonic anhydrase domain-containing protein	WBGene00000282	0.511	0.002	0.502	0.509	0.009	-0.5	up		up	up		down
Q8I4G3	CELE_T03F7.7	CRAL-TRIO domain-containing protein	WBGene00011404	-0.299	0.126	-0.057	-0.425	-0.242	0.183	down			down	down
Q9U1Q1	ubc-14	UBC core domain-containing protein	WBGene00006709	-0.339	0.093	0.014	-0.432	-0.353	0.079	down			down	down
Q7JMS4	cyld-1	USP domain-containing protein	WBGene00009594	-0.267	0.069	-0.001	-0.336	-0.266	0.07	down			down	down
Q8MQC1	C25H3.7	Uncharacterized protein	WBGene00016116	-0.358	0.043	-0.174	-0.402	-0.184	0.218	down			down	down	up
P34445	F54C8.7	Uncharacterized protein F54C8.7	WBGene00010040	-0.536	-0.089	-0.152	-0.447	-0.384	0.063	down			down	down
P91223	CELE_F07E5.5	Uncharacterized protein	WBGene00017210	2.055	0.461	0.435	1.594	1.621	0.026	up			up	up
G5EGA5	fat-2	Delta(12) fatty acid desaturase fat-2	WBGene00001394	0.136	-0.365	-0.02	0.501	0.156	-0.345		down		up		down
Q20048	mlcd-1	MaLonyl CoA Decarboxylase	WBGene00009439	-0.327	0.291	0.036	-0.618	-0.363	0.255	down	up		down	down
P19826	deb-1	Vinculin	WBGene00000942	-0.165	0.074	0.093	-0.239	-0.258	-0.019	down			down	down
Q9U307	gln-3	Glutamine synthetase	WBGene00001604	0.517	-0.006	0.103	0.523	0.415	-0.109	up			up	up
P54889	alh-13	Probable delta-1-pyrroline-5-carboxylate synthase	WBGene00011938	-0.486	-0.151	-0.294	-0.336	-0.192	0.144	down		down	down	down
Q7KPW7	mrpl-1	Mitochondrial Ribosomal Protein, Large	WBGene00017997	0.26	-0.188	-0.351	0.449	0.611	0.162	up		down	up	up
Q21884	CELE_R09H10.5	Uncharacterized protein	WBGene00011182	-0.295	0.146	-0.044	-0.44	-0.251	0.19	down			down	down
O01513	C48B6.2	Putative 40S ribosomal protein S4-like	WBGene00016740	1.159	0.188	0.18	0.971	0.979	0.008	up			up	up
P91280	CELE_F27C1.6	Uncharacterized protein	WBGene00017855	1.146	0.1	0.194	1.047	0.953	-0.094	up			up	up
Q94259	CELE_K04A8.1	Uncharacterized protein	WBGene00019373	-0.459	-0.046	0.079	-0.414	-0.538	-0.124	down			down	down
O61887	rnst-2	Ribonuclease T2 protein rnst-2	WBGene00019624	-0.303	0.258	0.104	-0.561	-0.407	0.154	down			down	down
H2L0Q6	ral-1	RAL (Ras-related GTPase) homolog	WBGene00021811	-0.501	0.472	0.027	-0.973	-0.528	0.445	down	up		down	down	up
Q17435	pfd-4	Probable prefoldin subunit 4	WBGene00007107	0.529	-0.162	0.061	0.691	0.468	-0.223	up			up	up
Q19441	CELE_F14B8.4	Uncharacterized protein	WBGene00017446	-1.95	0.435	0.205	-2.384	-2.155	0.229	down			down	down
E0R7L2	CELE_Y111B2A.12	WD_REPEATS_REGION domain-containing protein	WBGene00013735	0.914	0.265	0.175	0.649	0.739	0.09	up			up	up
O18156	CELE_T28D6.3	Uncharacterized protein	WBGene00012123	-0.493	0.796	0.684	-1.289	-1.178	0.112	down	up	up	down	down
Q09278	C45G9.5	Uncharacterized protein C45G9.5	WBGene00016676	-0.3	0.106	-0.088	-0.406	-0.212	0.194	down			down	down	up
Q22763	nep-22	NEPrilysin metallopeptidase family	WBGene00020788	-0.545	-0.034	-0.329	-0.511	-0.216	0.295	down		down	down	down	up
Q09543	paa-1	Probable serine/threonine-protein phosphatase PP2A regulatory subunit	WBGene00003901	-0.177	0.11	0.003	-0.287	-0.18	0.107	down			down	down
O62477	CELE_Y45F10D.7	Uncharacterized protein	WBGene00012887	1.387	0.225	0.229	1.162	1.158	-0.004	up			up	up
O17895	haf-3	HAlF transporter (PGP related)	WBGene00001813	-0.556	-0.001	-0.52	-0.555	-0.036	0.519	down		down	down		up
Q17514	dph-5	Diphthine methyl ester synthase	WBGene00007194	1.423	0.293	-0.084	1.13	1.507	0.377	up			up	up
Q09590	emb-8	NADPH--cytochrome P450 reductase	WBGene00001262	-0.471	-0.16	-0.51	-0.311	0.039	0.35	down	down	down	down		up
P54216	aldo-1	Fructose-bisphosphate aldolase 1	WBGene00011474	-0.152	0.153	-0.12	-0.305	-0.032	0.273	down	up		down		up
Q9XTZ5	maa-1	ACB domain-containing protein	WBGene00007680	-0.504	0.219	0.234	-0.723	-0.737	-0.015	down			down	down
G5EFU2;G5EFW8	ant-1.4	ADP/ATP translocase	WBGene00020140	-0.447	0.361	-0.1	-0.808	-0.347	0.461	down			down	down	up
P39055	dyn-1	Dynamin	WBGene00001130	-0.187	0.009	0.01	-0.196	-0.197	-0.001	down			down	down
Q9XXK1	atp-1	ATP synthase subunit alpha, mitochondrial	WBGene00010419	-0.319	0.282	-0.016	-0.601	-0.303	0.299	down			down	down	up
Q22993	pmt-2	Phosphoethanolamine N-methyltransferase 2	WBGene00018811	-0.194	0.158	-0.058	-0.352	-0.136	0.216	down			down	down	up
H2L2A2	CELE_F40F8.5	Uncharacterized protein	WBGene00009578	-0.819	0.011	-0.056	-0.831	-0.763	0.067	down			down	down
Q9U2D6	cnp-2	Calcineurin-interacting protein 2	WBGene00012901	-0.914	-0.402	-0.446	-0.512	-0.468	0.045	down	down	down	down	down
Q93618	F27D4.4	Zinc finger CCCH domain-containing protein 15 homolog	WBGene00009189	0.351	-0.046	0.052	0.398	0.299	-0.098	up			up	up
Q9NEQ8	CELE_Y59A8B.8	Uncharacterized protein	WBGene00013345	-0.481	0.004	0.042	-0.485	-0.524	-0.038	down			down	down
Q21752	vdac-1	Probable voltage-dependent anion-selective channel	WBGene00019900	-0.248	0.086	-0.277	-0.334	0.029	0.363	down		down	down		up
P41938	B0272.3	Probable 3-hydroxyacyl-CoA dehydrogenase B0272.3	WBGene00007129	-0.221	0.047	-0.074	-0.268	-0.147	0.121	down			down	down	up
P50432	mel-32	Serine hydroxymethyltransferase	WBGene00003214	-0.259	0.015	-0.019	-0.274	-0.24	0.034	down			down	down
Q9TYX1	dpf-5	Acylaminoacyl-peptidase	WBGene00001058	-0.242	-0.031	-0.112	-0.211	-0.13	0.081	down		down	down	down
Q7K7C1	CELE_Y106G6D.8	Activin_recp domain-containing protein	WBGene00013704	-0.63	0.054	-0.104	-0.683	-0.525	0.158	down			down	down
Q27511	htz-1	Histone H2A.V	WBGene00019947	-0.601	0.105	-0.12	-0.706	-0.481	0.225	down			down	down
Q09365	ZK1320.3	Uncharacterized protein ZK1320.3	WBGene00014253	-1.208	0.237	-0.409	-1.444	-0.799	0.646	down			down	down
Q27518	cyp-13A2	Putative cytochrome P450 CYP13A2	WBGene00011676	0.659	0	0.03	0.659	0.629	-0.03	up			up	up
O17725	CELE_D1086.3	DUF19 domain-containing protein	WBGene00008390	-1.906	0.826	-0.711	-2.732	-1.195	1.537	down			down	down	up
G4SL51	pqn-52	Prion-like-(Q/N-rich)-domain-bearing protein	WBGene00019713	-0.462	-0.01	0.047	-0.453	-0.509	-0.057	down			down	down
Q9XVM0	letm-1	LETM1 (Leucine zipper, EF-hand, TransMembrane mitochondrial protein) homolog	WBGene00010279	-0.461	-0.087	-0.511	-0.374	0.05	0.424	down		down	down		up
Q20025	pfn-2	Profilin-2	WBGene00003990	-0.549	-0.009	-0.039	-0.54	-0.51	0.029	down			down	down
Q23660	CELE_ZK899.2	Uncharacterized protein	WBGene00014141	-0.336	0.112	0.307	-0.448	-0.643	-0.195	down		up	down	down
Q09451	pho-11	Putative acid phosphatase 11	WBGene00007331	-0.379	0.522	0.163	-0.901	-0.542	0.359	down	up		down	down
Q95QW0	eif-3.L	Eukaryotic translation initiation factor 3 subunit L	WBGene00015920	0.306	0.043	-0.001	0.264	0.308	0.044	up			up	up
Q9XX57	dct-16	DAF-16/FOXO Controlled, germline Tumor affecting	WBGene00012615	-0.459	0.412	0.189	-0.871	-0.649	0.222	down			down	down
Q20819	tsfm-1	Elongation factor Ts, mitochondrial	WBGene00010094	-0.506	-0.038	-0.834	-0.468	0.328	0.795	down		down	down	up	up
Q02331	ZK370.4	Patatin-like phospholipase domain-containing protein ZK370.4	WBGene00022718	-0.263	0.03	-0.081	-0.293	-0.182	0.111	down			down	down
P05690	vit-2	Vitellogenin-2	WBGene00006926	-0.652	-0.203	-0.14	-0.449	-0.512	-0.063	down			down	down
Q94187	CELE_F16F9.4	Uncharacterized protein	WBGene00017515	0.454	-0.449	-0.161	0.903	0.616	-0.287	up	down		up	up
O02115	pcn-1	Proliferating cell nuclear antigen	WBGene00003955	-0.197	0.36	0.24	-0.557	-0.438	0.119		up		down	down
Q09454	dph-2	2-(3-amino-3-carboxypropyl)histidine synthase subunit 2	WBGene00007488	1.317	0.094	0.017	1.223	1.3	0.077	up			up	up
Q7YZG5	CELE_Y48G9A.9	Tyrosine-protein phosphatase	WBGene00021702	-0.369	0.296	0.059	-0.665	-0.429	0.237	down			down	down
Q9Y0A1	itr-1	Inositol 1,4,5-trisphosphate receptor itr-1	WBGene00002173	-0.527	-0.135	-0.11	-0.392	-0.417	-0.025	down			down	down
Q21012	F58H1.3	Enolase-phosphatase E1	WBGene00010286	-0.379	-0.023	0.105	-0.357	-0.484	-0.128	down			down	down
P51559	bli-4	Endoprotease bli-4	WBGene00000254	0.156	-0.273	-0.019	0.429	0.174	-0.254		down		up	up	down
Q93791	nid-1	NIDogen (Basement membrane protein)	WBGene00003738	-0.489	-0.032	-0.019	-0.457	-0.469	-0.013	down			down	down
P91027	chdp-1	Calponin-homology (CH) domain-containing protein	WBGene00015687	0.242	-0.125	0.082	0.368	0.16	-0.207	up			up	up	down
O62139	acox-1.4	Acyl-coenzyme A oxidase acox-1.4	WBGene00008567	-0.508	-0.064	0.164	-0.444	-0.673	-0.228	down			down	down	down
Q7YTI7	CELE_Y57G11C.40	Uncharacterized protein	WBGene00013329	-1.159	-0.216	-0.47	-0.943	-0.689	0.254	down		down	down	down
Q93761	F53C11.3	Uncharacterized oxidoreductase F53C11.3	WBGene00009973	-0.401	-0.053	-0.036	-0.348	-0.365	-0.017	down			down	down
P34668	ZK686.2	Putative ATP-dependent RNA helicase ZK686.2	WBGene00022792	1.109	0.148	0.083	0.961	1.026	0.066	up			up	up
A0A4V0INE6	pes-8	Patterned Expression Site	WBGene00003981	-0.599	0.413	-0.094	-1.012	-0.505	0.507	down			down	down	up
Q03606	T23G5.2	CRAL-TRIO domain-containing protein T23G5.2	WBGene00011962	-0.417	0.267	-0.013	-0.684	-0.404	0.28	down			down	down
Q19302	CELE_F10E7.5	Ribosome assembly factor mrt4	WBGene00017347	1.427	0.536	0.269	0.891	1.158	0.267	up	up		up	up
Q18580	pnk-4	4'-phosphopantetheine phosphatase	WBGene00006862	-0.529	0.166	0.295	-0.695	-0.825	-0.13	down			down	down
Q9N5Y2	art-1	Probable very-long-chain enoyl-CoA reductase art-1	WBGene00000198	-0.514	0.01	-0.121	-0.523	-0.393	0.131	down			down	down
G5EFM9	nekl-3	Serine/threonine-protein kinase nekl-3	WBGene00008956	-0.452	0.414	0.023	-0.865	-0.475	0.391	down			down	down
Q9GYL7	CELE_R03H10.1	Uncharacterized protein	WBGene00019854	-0.361	0.204	0.353	-0.565	-0.714	-0.149	down		up	down	down
G5ED44	fat-5	Delta(9)-fatty-acid desaturase fat-5	WBGene00001397	-0.664	0.18	0.33	-0.844	-0.994	-0.15	down			down	down
Q20833	CELE_F55D12.2	CRAL-TRIO domain-containing protein	WBGene00010111	-0.314	0.258	0.085	-0.572	-0.399	0.173	down			down	down
Q20683	ttc-36	Tetratricopeptide repeat protein 36	WBGene00009947	-0.331	0.359	0.072	-0.691	-0.404	0.287	down	up		down	down
Q23223	mtr-4	mRNA transport homolog 4	WBGene00012342	0.524	0.066	0.123	0.458	0.401	-0.057	up			up	up
Q20881	CELE_F56D5.6	Uncharacterized protein	WBGene00010150	-0.397	0.186	0.28	-0.583	-0.677	-0.094	down		up	down	down
Q18598	pmp-2	Peroxisomal Membrane Protein related	WBGene00004059	-0.338	0.022	0.142	-0.359	-0.48	-0.12	down			down	down
G5ED95	yars-1	Tyrosine--tRNA ligase	WBGene00013677	0.298	0.041	-0.028	0.257	0.325	0.068	up			up	up
G5EDS8	exos-7	RNase_PH domain-containing protein	WBGene00009289	0.797	0.232	0.061	0.565	0.735	0.17	up			up	up
Q9XW87	lonp-2	Lon protease homolog 2, peroxisomal	WBGene00013541	-0.334	0.1	0.107	-0.434	-0.441	-0.008	down			down	down
Q21850	CELE_R08E3.1	Uncharacterized protein	WBGene00019957	-0.506	-0.016	-0.232	-0.49	-0.274	0.216	down		down	down	down
Q21736	ddx-52	RNA helicase	WBGene00011032	0.642	-0.039	-0.044	0.681	0.686	0.005	up			up	up
Q93249	cab-1	Protein cab-1	WBGene00000277	-0.459	0.013	0.213	-0.472	-0.672	-0.2	down			down	down
Q19102	ard-1	Alcohol/Ribitol Dehydrogenase family	WBGene00000181	-0.48	0.34	-0.322	-0.819	-0.158	0.662	down			down		up
H2L0K1	CELE_T02C5.1	TNFR-Cys domain-containing protein	WBGene00020158	-0.536	0.186	0.038	-0.722	-0.574	0.148	down			down	down
Q18028	prx-3	Peroxisomal assembly protein PEX3	WBGene00004193	-0.391	0.115	-0.069	-0.505	-0.322	0.184	down			down	down
Q18916	acs-22	Fatty Acid CoA Synthetase family	WBGene00017012	-0.485	0.049	0.241	-0.534	-0.725	-0.191	down			down	down
Q09406	atg-16.2	Autophagic-related protein 16.2	WBGene00019427	-0.496	0.067	0.098	-0.563	-0.594	-0.031	down			down	down
O02621	gpx-1	Glutathione peroxidase 1	WBGene00009165	-0.786	0.431	0.12	-1.217	-0.906	0.311	down			down	down
O17777	CELE_F10D11.2	Uncharacterized protein	WBGene00008648	1.572	-0.429	0.267	2.001	1.305	-0.696	up			up	up
G5EG33	him-4	EGF-like domain-containing protein	WBGene00001863	-0.056	0.206	0.08	-0.262	-0.136	0.126		up		down	down	up
O44734	CELE_F57B10.8	Uncharacterized protein	WBGene00019005	1.285	0.071	0.137	1.214	1.148	-0.066	up			up	up
O17839	mrpl-54	Mitochondrial Ribosomal Protein, Large	WBGene00009128	0.452	-0.104	-0.458	0.556	0.911	0.354	up		down	up	up	up
Q9UAW2	CELE_DC2.5	Uncharacterized protein	WBGene00017082	-0.642	0.086	-0.606	-0.728	-0.036	0.692	down		down	down		up
O16369	aps-1	AP complex subunit sigma	WBGene00000159	-0.686	0.475	-0.189	-1.161	-0.497	0.664	down			down	down	up
G5EFK4	arf-3	ADP-ribosylation factor	WBGene00000183	-0.357	0.261	-0.037	-0.618	-0.32	0.298	down			down	down	up
Q94013	tgs-1	Trimethylguanosine synthase	WBGene00011631	0.587	0.023	0.107	0.563	0.48	-0.084	up			up	up
H2L0M0	pod-2	Acetyl-CoA carboxylase	WBGene00004076	-0.402	-0.113	0.061	-0.289	-0.463	-0.174	down			down	down	down
Q22620	pars-1	Proline--tRNA ligase	WBGene00004189	0.438	0.159	0.042	0.279	0.396	0.116	up	up		up	up
P34255	B0303.3	Probable 3-ketoacyl-CoA thiolase	WBGene00015125	-0.284	0.29	-0.246	-0.574	-0.038	0.536	down	up		down		up
O17883	strl-1	Steroidogenic acute regulatory-like protein 1	WBGene00009940	-0.415	-0.092	-0.206	-0.324	-0.21	0.114	down		down	down	down
Q9BL19	rpl-17	60S ribosomal protein L17	WBGene00004429	0.213	-0.242	-0.123	0.456	0.336	-0.119	up	down		up	up
Q22134	ppat-1	Amidophosphoribosyltransferase	WBGene00011407	-0.414	0.034	-0.118	-0.448	-0.295	0.152	down			down	down
Q9U2R7	CELE_Y11D7A.10	Uncharacterized protein	WBGene00012434	-0.397	0.167	-0.245	-0.564	-0.152	0.412	down			down		up
Q95XP5	mca-3	Calcium-transporting ATPase	WBGene00003153	-0.151	0.064	0.1	-0.215	-0.252	-0.037	down			down	down
P40614	F01G4.6	Phosphate carrier protein, mitochondrial	WBGene00008505	-0.196	0.131	-0.06	-0.327	-0.135	0.191	down			down	down	up
Q21353	glt-3	Putative sodium-dependent excitatory amino acid transporter glt-3	WBGene00001621	-0.642	0.364	0.008	-1.007	-0.651	0.356	down			down	down
A0A486WXW2	acl-14	PlsC domain-containing protein	WBGene00019465	-0.479	-0.006	-0.048	-0.474	-0.431	0.042	down			down	down
Q9N4U1	CELE_Y49F6B.2	Fcf2 domain-containing protein	WBGene00021715	1.527	0.215	0.306	1.312	1.22	-0.092	up			up	up
O17901	copz-1	Probable coatomer subunit zeta	WBGene00010333	-0.369	0.386	0.028	-0.754	-0.397	0.357	down	up		down	down	up
Q22601	apa-2	AP-2 complex subunit alpha	WBGene00000161	-0.272	0.092	0.035	-0.364	-0.307	0.057	down			down	down
A0A131MD37	trpp-11	Foie-gras_1 domain-containing protein	WBGene00015173	-0.404	0.252	-0.019	-0.656	-0.385	0.271	down			down	down
Q19553	papl-1	Purple acid phosphatase	WBGene00008936	-0.704	0.04	-0.357	-0.745	-0.347	0.398	down		down	down	down	up
Q8MNT0	lim-8	LIM domain family	WBGene00017904	-0.494	-0.095	-0.275	-0.399	-0.219	0.18	down		down	down	down
Q21795	kmo-1	Kynurenine 3-monooxygenase	WBGene00011089	-0.218	0.161	0.031	-0.379	-0.249	0.13	down			down	down
H2KZY3	CELE_F49E8.7	Uncharacterized protein	WBGene00018638	0.701	-0.031	0.058	0.732	0.643	-0.088	up			up	up
Q22824	cgr-1	CRAL/TRIO and GOLD domain suppressor of activated Ras	WBGene00020847	-0.355	-0.019	0.138	-0.336	-0.493	-0.156	down			down	down
Q9U348;Q9U349;Q9XUE9;Q9XVG3	col-93	Col_cuticle_N domain-containing protein	WBGene00000668	0.993	0.07	-0.132	0.923	1.125	0.202	up			up	up
Q22317	anp-1	Aminopeptidase	WBGene00011587	-1.387	-0.661	-0.273	-0.726	-1.114	-0.389	down	down		down	down	down
G5EFJ3	C08E8.4	NADAR domain-containing protein	WBGene00007440	-0.713	0.396	0.011	-1.109	-0.724	0.385	down			down	down
G5EDZ2	umps-1	Uridine 5'-monophosphate synthase	WBGene00011559	-0.179	0.139	0.03	-0.318	-0.209	0.109	down			down	down
Q19305	spon-1	Spondin-1	WBGene00006893	-0.23	0.396	-0.062	-0.626	-0.168	0.458		up		down		up
O61874	dod-19	Downstream Of DAF-16 (Regulated by DAF-16)	WBGene00022644	-0.501	0.589	-0.181	-1.09	-0.321	0.77	down	up		down		up
Q21053	vps-35	Vacuolar protein sorting-associated protein 35	WBGene00006933	-0.343	0.181	0.06	-0.524	-0.402	0.121	down			down	down
Q9U2A8	rpl-43	60S ribosomal protein L37a	WBGene00004456	-1.414	1.547	-0.403	-2.961	-1.011	1.951	down	up		down		up
G5EGK8	let-92	Serine/threonine-protein phosphatase 2A catalytic subunit	WBGene00002363	-0.349	-0.016	-0.078	-0.333	-0.271	0.062	down			down	down
O16305	cmd-1	Calmodulin	WBGene00000552	-0.299	0.239	0.131	-0.538	-0.431	0.108	down			down	down
Q18486	coq-8	Atypical kinase coq-8, mitochondrial	WBGene00000767	-0.333	-0.053	-0.278	-0.279	-0.054	0.225	down		down	down		up
Q94215	lec-11	Galectin	WBGene00002274	-0.372	0.581	0.135	-0.953	-0.507	0.445		up		down	down
Q19706	eif-3.G	Eukaryotic translation initiation factor 3 subunit G	WBGene00001230	0.33	0.028	-0.012	0.302	0.342	0.04	up			up	up
G5EEN4	gck-3	Germinal center kinase 3	WBGene00013355	-0.153	0.268	0.105	-0.421	-0.258	0.163		up		down	down
Q23564	clec-60	VWFA domain-containing protein	WBGene00014046	-1.336	0.791	-0.735	-2.127	-0.6	1.527	down			down		up
Q8IG67	let-611	DNA-directed RNA polymerase III subunit RPC3	WBGene00016750	0.621	-0.049	0.068	0.67	0.554	-0.117	up			up	up
Q93167	C01G10.7	HpcH_HpaI domain-containing protein	WBGene00007234	-0.324	0.142	-0.332	-0.466	0.007	0.473	down		down	down		up
P90835	mif-3	MIF-like protein mif-3	WBGene00003236	-0.519	0.529	-0.052	-1.048	-0.467	0.581	down			down	down	up
A0A1C3NSL9	ajm-1	Apical junction molecule	WBGene00000100	-0.212	0.117	0.15	-0.329	-0.362	-0.033	down			down	down
Q9XWD1	acs-5	Long-chain-fatty-acid--CoA ligase	WBGene00013575	-0.203	0.038	0.005	-0.241	-0.208	0.033	down			down	down
Q19974	nol-10	NUC153 domain-containing protein	WBGene00017989	1.718	0.191	0.175	1.527	1.543	0.016	up			up	up
G5EES3	alg-1	Protein argonaute	WBGene00000105	-0.206	0.119	0.147	-0.325	-0.353	-0.028	down			down	down
Q23190	dct-11	DAF-16/FOXO Controlled, germline Tumor affecting	WBGene00021060	-0.506	-0.032	-0.05	-0.474	-0.456	0.018	down			down	down
G5EBK1	pbo-4	Na(+)/H(+) exchanger protein 7	WBGene00003943	-0.593	0.121	-0.016	-0.714	-0.577	0.137	down			down	down
Q94392	nsf-1	Vesicle-fusing ATPase	WBGene00003818	-0.4	0.01	0	-0.41	-0.4	0.01	down			down	down
H2KZA3	pqn-22	ZM domain-containing protein	WBGene00004112	-0.091	0.136	0.113	-0.228	-0.204	0.024		up	up	down	down
P34213	rab-6.1	Ras-related protein rab-6.1	WBGene00004269	-0.373	0.317	0.056	-0.69	-0.429	0.261	down			down	down
Q23400	ZK1127.5	Probable RNA 3'-terminal phosphate cyclase-like protein	WBGene00022852	1.236	0.202	0.124	1.034	1.112	0.078	up			up	up
Q20412	F44G4.2	Probable NADH dehydrogenase [ubiquinone] 1 beta subcomplex subunit 2, mitochondrial	WBGene00009712	0.483	-0.113	0.783	0.596	-0.3	-0.896	up		up	up	down	down
Q19545	utp-20	DRIM domain-containing protein	WBGene00007050	0.864	0.17	0.204	0.695	0.661	-0.034	up			up	up
Q93717	slc-25a42	SLC (SoLute Carrier) homolog	WBGene00009666	-0.483	0.352	0.049	-0.835	-0.532	0.303	down			down	down
O17606	C27H6.8	MYG1 protein C27H6.8	WBGene00007787	0.346	0.087	-0.129	0.259	0.475	0.216	up		down	up	up	up
P04970;P17331	gpd-1	Glyceraldehyde-3-phosphate dehydrogenase 1;Glyceraldehyde-3-phosphate dehydrogenase 4	WBGene00001683	-0.58	0.154	-0.091	-0.734	-0.49	0.245	down			down	down
Q9TXP0	rps-27	40S ribosomal protein S27	WBGene00004496	0.384	-0.26	0.142	0.644	0.242	-0.402	up			up		down
Q9U2D9	gsy-1	Glycogen [starch] synthase	WBGene00001793	-0.286	0.115	0.044	-0.401	-0.33	0.071	down			down	down
Q93839	acox-1.6	Acyl-coenzyme A oxidase	WBGene00010336	-0.434	0.024	0.012	-0.458	-0.446	0.012	down			down	down
Q9N5S7	txdc-12.2	ThioredoXin Domain Containing protein homolog	WBGene00018656	0.029	0.419	0.204	-0.389	-0.174	0.215		up	up	down	down	up
Q9TZ51	far-7	Fatty Acid/Retinol binding protein	WBGene00001391	-0.391	0.336	0.127	-0.728	-0.519	0.209	down			down	down
P52011	cyn-3	Peptidyl-prolyl cis-trans isomerase 3	WBGene00000879	-0.227	0.437	0.063	-0.664	-0.29	0.374		up		down	down	up
H2KZA6	CELE_R148.5	PID domain-containing protein	WBGene00020104	-0.398	0.213	0.007	-0.611	-0.405	0.206	down			down	down
G4SLH0	ttn-1	Titin homolog	WBGene00006436	-0.21	0.065	0.067	-0.275	-0.277	-0.002	down			down	down
Q9BI97	CELE_F17C11.11	Uncharacterized protein	WBGene00008922	0.746	0.031	0.381	0.716	0.365	-0.35	up		up	up	up	down
A5PEY3	rpom-1	DNA-directed RNA polymerase	WBGene00013680	0.615	0.064	-0.174	0.551	0.79	0.239	up			up	up
A9UJN4	pptr-2	Serine/threonine protein phosphatase 2A regulatory subunit	WBGene00007554	-0.538	-0.11	-0.041	-0.428	-0.498	-0.07	down			down	down
O16454	tag-196	Uncharacterized protein	WBGene00007055	0.549	0.11	0.073	0.438	0.476	0.037	up			up	up
Q4TT88	pam-1	Puromycin-sensitive aminopeptidase	WBGene00003914	0.009	-0.196	-0.204	0.205	0.214	0.008		down	down	up	up
Q19202	apy-1	Apyrase apy-1	WBGene00017244	-0.342	-0.012	-0.45	-0.33	0.108	0.438	down		down	down		up
G5EG13	dhs-12	DeHydrogenases, Short chain	WBGene00000975	-0.135	0.333	0.044	-0.468	-0.179	0.289		up		down		up
Q19088	rabn-5	FYVE-type domain-containing protein	WBGene00017161	-0.356	0.172	0.087	-0.528	-0.444	0.084	down			down	down
Q9TZD9	haf-4	HAlF transporter (PGP related)	WBGene00001814	-0.161	0.176	0.093	-0.337	-0.254	0.084	down	up		down	down
Q20456	hum-4	Heavy chain, Unconventional Myosin	WBGene00002037	-0.333	0.003	-0.011	-0.336	-0.322	0.014	down			down	down
H2L045	tns-1	Tensin homolog	WBGene00006508	-0.174	0.185	0.128	-0.359	-0.302	0.057	down			down	down
B3WFT8	C14F11.4	Uncharacterized protein	WBGene00015780	-1.425	-0.867	-0.914	-0.557	-0.51	0.047	down	down	down	down	down
G5EBK4	atg-7	Ubiquitin-like modifier-activating enzyme ATG7	WBGene00010882	-0.366	0.094	-0.005	-0.46	-0.361	0.099	down			down	down
Q9XUD6	CELE_F55G11.8	CUB_2 domain-containing protein	WBGene00010128	-0.293	1.076	-0.173	-1.369	-0.121	1.249		up		down		up
Q21267	timp-1	NTR domain-containing protein	WBGene00019476	-0.786	0.571	-0.079	-1.357	-0.707	0.65	down			down	down
Q23447	CELE_ZK180.6	Uncharacterized protein	WBGene00022680	-0.483	0.559	0.203	-1.042	-0.686	0.356	down	up		down	down
Q1HB05	cyp-25a3	CYtochrome P450 family	WBGene00014697	-0.327	0.197	0.339	-0.524	-0.665	-0.141	down		up	down	down
O16314	C05C8.1	ATP synthase subunit s, mitochondrial	WBGene00015460	-0.32	-0.027	-0.26	-0.294	-0.06	0.233	down		down	down		up
P39407	yjjU	Uncharacterized protein YjjU		-0.981	0.949	0.361	-1.93	-1.342	0.588	down			down	down
Q2PJ74	aman-2	Alpha-mannosidase	WBGene00010284	-0.29	0.054	0.081	-0.344	-0.371	-0.027	down			down	down
P09588;Q27485	his-68	Histone H2A	WBGene00001921;WBGene00001925;WBGene00001927;WBGene00001917;WBGene00001907;WBGene00001904;WBGene00001881;WBGene00001931;WBGene00001935;WBGene00001939;WBGene00001893;WBGene00001895;WBGene00001877;WBGene00001942;WBGene00001890;WBGene00001886	-0.931	0.538	-0.144	-1.469	-0.787	0.682	down			down	down
O62327	gpx-2	Glutathione peroxidase 2	WBGene00011045	-0.4	-0.052	-0.048	-0.347	-0.352	-0.005	down			down	down
P52009	cyn-1	Peptidyl-prolyl cis-trans isomerase 1	WBGene00000877	0.53	0.105	-0.245	0.425	0.775	0.35	up		down	up	up	up
P34673	fahd-1	Fumarylacetoacetate hydrolase domain-containing protein 1	WBGene00022798	-0.33	0.108	-0.085	-0.438	-0.245	0.192	down			down	down
D3NQ92	CELE_Y25C1A.14	Uncharacterized protein	WBGene00194985	-1.249	0.043	-0.243	-1.291	-1.005	0.286	down			down	down
H2KYU6;Q95QZ9	npl-4.1	Nuclear protein localization protein 4 homolog 1;Nuclear protein localization protein 4 homolog 2	WBGene00019120	-0.282	0.048	-0.125	-0.33	-0.157	0.173	down			down	down	up
O17214	fum-1	Probable fumarate hydratase, mitochondrial	WBGene00001503	-0.14	0.179	-0.134	-0.32	-0.006	0.314	down	up		down		up
Q95XC8	htp-2	HORMA domain-containing protein	WBGene00002033	0.233	-0.259	0.012	0.492	0.221	-0.271	up			up	up	down
O45017	CELE_W01B11.6	Thioredoxin domain-containing protein	WBGene00020917	-1.015	0.237	0.465	-1.252	-1.48	-0.227	down			down	down
Q9XWV2	Y37D8A.2	Putative phospholipase B-like 1	WBGene00012544	-0.167	0.293	0.17	-0.46	-0.337	0.123		up		down	down
P55956	asp-3	Aspartic protease 3	WBGene00000216	-0.725	-0.108	-0.331	-0.617	-0.394	0.223	down		down	down	down
Q65XX9	mvk-1	MeValonate Kinase	WBGene00021534	-0.11	0.297	0.062	-0.407	-0.173	0.235		up		down	down	up
G5EG58	pgp-9	p-GlycoProtein related	WBGene00004003	-0.464	0.198	-0.196	-0.662	-0.268	0.394	down			down		up
Q9BKU3	eif-2alpha	Eukaryotic translation initiation factor 2 subunit 1	WBGene00021351	0.256	-0.029	-0.233	0.285	0.49	0.205	up		down	up	up	up
Q21190	unc-1	Protein unc-1	WBGene00006741	-0.192	0.159	0.158	-0.351	-0.35	0.001	down			down	down
Q09629	ZK673.2	Probable adenylate kinase isoenzyme ZK673.2	WBGene00014058	-0.49	-0.037	-0.541	-0.454	0.05	0.504	down		down	down		up
G5EC25	cept-2	Choline/EthanolaminePhosphoTransferase	WBGene00013024	-0.83	0.625	-0.204	-1.456	-0.626	0.829	down			down	down	up
Q20769	CELE_F54D5.3	Uncharacterized protein	WBGene00010049	-0.962	0.238	-0.362	-1.201	-0.6	0.601	down			down	down	up
Q9XVJ2	T03F6.3	Probable glucosamine-6-phosphate isomerase	WBGene00011399	-0.496	-0.04	0.438	-0.455	-0.934	-0.479	down		up	down	down	down
Q9TZ63	CELE_F56F11.2	Uncharacterized protein	WBGene00018989	-0.381	0.32	0.056	-0.701	-0.437	0.264	down			down	down
Q9XVS9	dhs-22	DeHydrogenases, Short chain	WBGene00000985	-0.362	0.243	0.12	-0.606	-0.483	0.123	down			down	down
O62325	rbm-28	RNA Binding Motif protein homolog	WBGene00011043	1.167	0.276	0.066	0.891	1.101	0.21	up			up	up
G5EEZ0	CELE_ZK1010.2	DUF155 domain-containing protein	WBGene00014176	-0.348	0.084	-0.273	-0.432	-0.075	0.357	down		down	down		up
O44782	vpr-1	Major sperm protein	WBGene00018008	-0.292	0.268	0.098	-0.56	-0.391	0.169	down			down	down
G5EEI4	asp-1	Aspartic protease 1	WBGene00000214	-0.481	0.114	-0.112	-0.595	-0.369	0.226	down			down	down
G5ECY0	dlg-1	Disks large homolog 1	WBGene00001006	-0.239	0.197	0.192	-0.436	-0.431	0.005	down			down	down
A7DTF5	CELE_Y56A3A.7	Uncharacterized protein	WBGene00013228	0.294	-0.076	-0.095	0.37	0.388	0.019	up			up	up
Q9N3T5	spg-7	AFG3-like protein spg-7	WBGene00004978	-0.417	-0.054	-0.564	-0.363	0.148	0.511	down		down	down		up
H2KZ70	CELE_ZC477.3	Uncharacterized protein	WBGene00022618	-0.381	-0.062	-0.242	-0.319	-0.139	0.18	down		down	down	down	up
Q93576	ndk-1	Nucleoside diphosphate kinase	WBGene00009119	0.319	0	0.01	0.319	0.309	-0.011	up			up	up
O62421	CELE_Y32F6B.1	Solute carrier organic anion transporter family member	WBGene00012531	-0.552	0.203	-0.029	-0.755	-0.523	0.232	down			down	down
Q18668	C47D12.2	Dymeclin	WBGene00008136	-0.517	0.127	0.039	-0.644	-0.556	0.088	down			down	down
Q20762	F54D1.6	Uncharacterized protein F54D1.6	WBGene00010047	-0.412	0.09	-0.033	-0.502	-0.379	0.123	down			down	down
Q23369	best-22	Bestrophin homolog 22	WBGene00013921	-0.612	0.277	0.001	-0.889	-0.613	0.276	down			down	down
O17620	C29F7.1	CHK domain-containing protein	WBGene00007810	-0.454	0.482	0.247	-0.936	-0.701	0.235	down			down	down
P45965	T09A5.5	Uncharacterized protein T09A5.5	WBGene00011634	0.422	-0.002	-0.188	0.423	0.61	0.186	up			up	up
Q17561	aly-1	FoP_duplication domain-containing protein	WBGene00000120	-0.334	0.343	0.089	-0.678	-0.424	0.254	down			down	down
Q9N5E4	CELE_T02H6.11	Cytochrome b-c1 complex subunit 7	WBGene00020181	0.366	0.022	1.002	0.344	-0.636	-0.98	up		up	up	down	down
Q9N3Z0	sqst-2	ZZ-type domain-containing protein	WBGene00021495	-0.608	0.22	-0.357	-0.828	-0.252	0.576	down			down		up
P34328	hsp-12.2	Heat shock protein Hsp-12.2	WBGene00002011	-0.362	0.103	0.116	-0.465	-0.478	-0.013	down			down	down
Q9N2Y1	pbo-1	Uncharacterized protein	WBGene00003941	-0.341	0.034	-0.1	-0.375	-0.241	0.134	down			down	down
Q22159	CELE_T04F3.4	Uncharacterized protein	WBGene00011439	-0.534	0.209	0.008	-0.743	-0.542	0.201	down			down	down
P34528	K12H4.7	Putative serine protease K12H4.7	WBGene00019682	-0.649	-0.028	-0.254	-0.62	-0.395	0.226	down			down	down
A5A8P5	CELE_Y47G6A.33	Uncharacterized protein	WBGene00045399	-1.089	0.397	-0.284	-1.487	-0.806	0.681	down			down	down
O45011	CELE_W10C8.5	Arginine kinase	WBGene00021128	-0.16	0.079	-0.165	-0.239	0.005	0.244	down		down	down		up
P34392	F09G8.7	Uncharacterized protein F09G8.7	WBGene00017321	-0.709	0.477	0.172	-1.186	-0.881	0.305	down			down	down
P34689	glh-1	ATP-dependent RNA helicase glh-1	WBGene00001598	1.321	0.284	-0.145	1.037	1.466	0.429	up			up	up
Q22915	memo-1	Protein memo-1 homolog	WBGene00016500	-0.379	0.11	0.091	-0.489	-0.471	0.019	down			down	down
Q10454	F46H5.3	Probable arginine kinase F46H5.3	WBGene00018519	-0.142	0.264	-0.034	-0.406	-0.108	0.298		up		down		up
O17005	mrpl-4	Mitochondrial Ribosomal Protein, Large	WBGene00020717	0.485	0.017	-0.315	0.468	0.799	0.331	up		down	up	up	up
Q95QL1	CELE_F13H8.11	Lipase_GDSL domain-containing protein	WBGene00017443	-0.552	0.193	0.197	-0.745	-0.749	-0.004	down			down	down
Q9GZH3	T22D1.3	Inosine-5'-monophosphate dehydrogenase	WBGene00020682	-0.124	-0.624	-0.43	0.5	0.306	-0.193		down	down	up	up
Q93565	tli-1	ToLlIp homolog	WBGene00006578	-0.449	0.006	0.093	-0.455	-0.542	-0.086	down			down	down
P37806	unc-87	Protein unc-87	WBGene00006819	-0.078	0.152	0.067	-0.23	-0.145	0.085		up		down	down
Q65XY3	twk-49	Ion_trans_2 domain-containing protein	WBGene00019904	-0.294	0.367	0.035	-0.661	-0.329	0.332	down	up		down	down
Q21925	pges-2	Prostaglandin E synthase 2	WBGene00011239	0.272	-0.138	-0.113	0.409	0.385	-0.024	up			up	up
P90781	C55A6.7	Uncharacterized protein	WBGene00008336	-0.161	0.242	0.13	-0.403	-0.291	0.112		up		down	down
Q93545	CELE_F20G2.2	Uncharacterized protein	WBGene00008986	0.349	0.045	0.076	0.304	0.273	-0.031	up			up	up
Q10943	arf-1.2	ADP-ribosylation factor 1-like 2	WBGene00000182	-0.331	0.249	-0.02	-0.581	-0.311	0.27	down			down	down
Q17680	CELE_F33C8.4	Uncharacterized protein	WBGene00009358	-0.266	0.304	0.076	-0.57	-0.342	0.228	down			down	down
O17954	nspg-9	Nematode Specific Peptide family	WBGene00010793	-0.348	0.198	0.052	-0.547	-0.401	0.146	down			down	down
G5ECC1	CELE_F13G3.10	HYPK_UBA domain-containing protein	WBGene00008768	0.356	-0.138	0.06	0.494	0.296	-0.198	up			up	up
Q9NEU2	pro-3	Protein SDA1 homolog	WBGene00012676	1.37	0.087	0.158	1.283	1.212	-0.072	up			up	up
O16657	C03H5.3	Uncharacterized protein	WBGene00015405	1.432	0.445	0.296	0.986	1.136	0.15	up			up	up
O01815	dhod-1	Dihydroorotate dehydrogenase (quinone), mitochondrial	WBGene00020932	-0.22	0.071	0.002	-0.291	-0.222	0.069	down			down	down
O76360	egl-4	cGMP-dependent protein kinase egl-4	WBGene00001173	-0.33	-0.069	-0.028	-0.26	-0.302	-0.042	down			down	down
Q19427	ndx-9	NAD-capped RNA hydrolase ndx-9	WBGene00003586	-0.395	0.085	-0.129	-0.481	-0.266	0.214	down			down	down
Q9NA99	CELE_Y53F4B.21	Uncharacterized protein	WBGene00013167	-0.483	0.07	-0.103	-0.553	-0.38	0.173	down			down	down
O17695	hda-1	Histone deacetylase 1	WBGene00001834	-0.26	0.184	0.066	-0.444	-0.326	0.118	down			down	down
Q18524	pcyt-2.2	Ethanolamine-phosphate cytidylyltransferase	WBGene00016531	-0.283	0.287	0.077	-0.57	-0.36	0.21	down			down	down
P34542	R05D3.9/R05D3.10	Uncharacterized protein R05D3.9	WBGene00019882	-0.736	-0.28	-0.253	-0.456	-0.483	-0.027	down	down	down	down	down
Q22013	CELE_R186.3	Signal recognition particle receptor subunit beta	WBGene00011306	-0.364	0.177	-0.015	-0.541	-0.35	0.191	down			down	down
Q6A590	CELE_T28B4.1	F-box domain-containing protein	WBGene00020884	-0.34	0.12	0.121	-0.46	-0.461	-0.001	down			down	down
O17274	lgc-34	Neur_chan_LBD domain-containing protein	WBGene00020836	-0.2	0.278	0.068	-0.478	-0.268	0.21		up		down	down
Q11102	tag-278	Putative protein tag-278	WBGene00015356	-1.292	0.566	-0.405	-1.857	-0.887	0.971	down			down	down	up
Q9XVV5	dpm-3	Probable dolichol-phosphate mannosyltransferase subunit 3	WBGene00009219	-1.535	0.86	-0.344	-2.395	-1.191	1.204	down			down	down
Q20636	gpb-2	Guanine nucleotide-binding protein subunit beta-2	WBGene00001680	-0.332	0.048	-0.016	-0.38	-0.317	0.063	down			down	down
O45143	C34H4.2	Uncharacterized protein	WBGene00016425	-0.302	0.246	0.463	-0.549	-0.766	-0.217	down		up	down	down
Q9XUU9	K05C4.2	Protein jagunal homolog	WBGene00010579	1.596	-0.828	-0.31	2.424	1.905	-0.518	up			up	up
O18180	mrpl-12	Mitochondrial Ribosomal Protein, Large	WBGene00012361	0.399	0.03	-0.326	0.37	0.726	0.356	up		down	up	up	up
O45865	ant-1.1	ADP/ATP translocase	WBGene00006439	-0.272	0.352	0.013	-0.624	-0.285	0.339		up		down	down	up
P91856	F26H9.5	Probable phosphoserine aminotransferase	WBGene00009177	-0.171	0.162	-0.057	-0.332	-0.113	0.219	down			down		up
P91455	T19B4.3	Adenine phosphoribosyltransferase	WBGene00020557	-0.167	0.102	-0.087	-0.27	-0.081	0.189	down			down		up
O62214	CELE_F33A8.4	Uncharacterized protein	WBGene00009352	0.531	-0.152	-0.033	0.683	0.564	-0.119	up			up	up
Q27257	dif-1	Protein dif-1	WBGene00000996	-0.181	0.335	-0.028	-0.517	-0.153	0.363		up		down		up
G5ECA7	CELE_T02D1.8	DUF4440 domain-containing protein	WBGene00011374	-0.112	0.282	0.134	-0.394	-0.246	0.148		up		down	down
G5ECX8	istr-1	IST1 homolog	WBGene00010736	-0.255	0.016	-0.151	-0.271	-0.104	0.168	down		down	down		up
Q22968	gcst-1	Aminomethyltransferase	WBGene00017765	-0.272	0.092	-0.227	-0.365	-0.045	0.32	down		down	down		up
Q22101	CELE_T02G5.7	Uncharacterized protein	WBGene00020166	-0.352	0.057	-0.126	-0.409	-0.226	0.183	down			down	down
Q21888	CELE_R102.2	DUF4440 domain-containing protein	WBGene00011289	-0.208	0.126	0.23	-0.334	-0.437	-0.104	down		up	down	down
Q11117	lmp-1	LAMP family protein lmp-1	WBGene00003053	-0.176	0.415	-0.025	-0.591	-0.151	0.441		up		down		up
Q22251	cox-15	Cytochrome OXidase assembly protein	WBGene00011526	0.395	-0.211	-0.431	0.607	0.826	0.22	up		down	up	up
G5EFB5	cpn-1	CPN-1	WBGene00000777	0.157	-0.355	-0.135	0.512	0.292	-0.221		down		up	up
P41992	ggtb-1	Probable geranylgeranyl transferase type-2 subunit beta	WBGene00015099	-0.378	0.131	0.021	-0.509	-0.399	0.11	down			down	down
Q304D5	erp-44.1	Thioredoxin domain-containing protein	WBGene00016278	-0.39	-0.062	-0.054	-0.329	-0.337	-0.008	down			down	down
Q9N426	pnc-1	Isochorismatase domain-containing protein	WBGene00021395	-0.352	0.153	0.064	-0.505	-0.415	0.09	down			down	down
P45969	sds-22	Protein phosphatase 1 regulatory subunit SDS22 homolog	WBGene00011637	-0.272	0.076	-0.135	-0.349	-0.137	0.212	down			down		up
Q7YX96	C08F8.9	Uncharacterized protein	WBGene00007449	-0.475	0.597	-0.355	-1.072	-0.12	0.952	down	up		down		up
P34264	mrpl-11	Probable 39S ribosomal protein L11, mitochondrial	WBGene00015133	0.536	0.031	-0.269	0.504	0.805	0.3	up		down	up	up	up
P0A7E1	pyrD	Dihydroorotate dehydrogenase (quinone)		2.041	-0.631	0.698	2.672	1.343	-1.329	up			up	up
G5EGN2	fat-6	Delta(9)-fatty-acid desaturase fat-6	WBGene00001398	-0.641	0.033	-0.04	-0.674	-0.602	0.073	down			down	down
P48156	rps-8	40S ribosomal protein S8	WBGene00004477	0.175	-0.051	-0.021	0.226	0.196	-0.03	up			up	up
Q9UB00	gba-4	Putative glucosylceramidase 4	WBGene00021160	-0.897	-0.321	0.033	-0.575	-0.93	-0.354	down	down		down	down	down
Q18886	vps-32.1	Related to yeast Vacuolar Protein Sorting factor	WBGene00016961	-0.331	0.227	0.175	-0.558	-0.506	0.052	down			down	down
U4PBY2	hum-8	Myosin motor domain-containing protein	WBGene00002041	-0.313	0.012	-0.014	-0.325	-0.299	0.026	down			down	down
Q17433	dnj-2	DnaJ homolog dnj-2	WBGene00001020	0.088	-0.199	-0.033	0.287	0.121	-0.166		down		up		down
Q09958	C18A3.3	Probable rRNA-processing protein EBP2 homolog	WBGene00015941	1.232	0.328	0.206	0.904	1.027	0.123	up			up	up
O18155	CELE_T28D6.7	START domain-containing protein	WBGene00012127	-0.613	0.087	0.091	-0.7	-0.704	-0.004	down			down	down
P91373	CELE_K11H12.8	Uncharacterized protein	WBGene00019664	-0.505	0.405	-0.426	-0.91	-0.079	0.831	down			down		up
G5ECV9	alh-3	10-formyltetrahydrofolate dehydrogenase	WBGene00000109	-0.126	0.143	0.03	-0.27	-0.157	0.113	down			down	down
P29691	eef-2	Elongation factor 2	WBGene00001167	0.384	0.112	0.147	0.272	0.237	-0.035	up		up	up	up
Q23655	nlt-1	Non-specific lipid-transfer protein-like 1	WBGene00003773	-0.517	0.174	-0.067	-0.69	-0.449	0.241	down			down	down
Q9N4Z0	Y45G12B.3	L-2-hydroxyglutarate dehydrogenase, mitochondrial	WBGene00021564	-0.307	-0.037	-0.257	-0.27	-0.05	0.22	down		down	down		up
Q19265	algn-2	Alpha-1,3/1,6-mannosyltransferase ALG2	WBGene00017282	-0.433	-0.044	-0.141	-0.389	-0.292	0.097	down			down	down
Q9U2F1	CELE_Y46G5A.18	R3H-assoc domain-containing protein	WBGene00012908	1.419	0.252	0.287	1.167	1.131	-0.036	up			up	up
P91177	C50F2.4	Uncharacterized protein	WBGene00016838	-0.402	0.22	0.105	-0.622	-0.506	0.116	down			down	down
Q9NES8	pph-5	Serine/threonine-protein phosphatase 5	WBGene00012665	-0.239	0.297	-0.011	-0.535	-0.227	0.308	down			down		up
Q22169	trap-2	Translocon-associated protein subunit beta	WBGene00020216	0.272	-0.247	-0.008	0.519	0.28	-0.239	up			up	up
H2FLJ1	stl-1	PHB domain-containing protein	WBGene00006061	-0.515	0.165	-0.839	-0.679	0.325	1.004	down		down	down	up	up
Q20277	fipr-21	FIP (Fungus-Induced Protein) Related	WBGene00009621	0.492	0.054	0.059	0.438	0.433	-0.005	up			up	up
Q22814	gst-13	Glutathione S-Transferase	WBGene00001761	-0.497	0.149	-0.473	-0.646	-0.024	0.622	down		down	down		up
P34388	mrps-9	Probable 40S ribosomal protein S9, mitochondrial	WBGene00017319	0.346	-0.058	0.133	0.403	0.213	-0.191	up			up	up
Q93315	cytb-5.1	Cytochrome b5 heme-binding domain-containing protein	WBGene00007848	-0.222	1.267	0.594	-1.489	-0.816	0.673		up		down	down
Q9NLD1	hrpr-1	Heterogeneous nuclear RibonucleoProtein (HnRNP) R homolog	WBGene00002000	-0.145	0.214	0.017	-0.359	-0.162	0.196		up		down	down	up
P34308	clp-1	Calpain clp-1	WBGene00000542	-0.146	0.057	0.045	-0.203	-0.191	0.012	down			down	down
G5EFR6	mca-1	Calcium-transporting ATPase	WBGene00003151	-0.14	0.2	0.127	-0.34	-0.267	0.073		up		down	down
P32740	R107.2	ATP-dependent (S)-NAD(P)H-hydrate dehydratase	WBGene00011298	-0.405	0.056	-0.072	-0.461	-0.333	0.128	down			down	down
Q19317	sel-2	Putative neurobeachin homolog	WBGene00004760	-0.338	0.189	0.095	-0.527	-0.433	0.094	down			down	down
Q19057	acdh-12	Acyl CoA DeHydrogenase	WBGene00017125	-0.254	0.006	-0.139	-0.26	-0.115	0.145	down		down	down	down	up
U4PLR3	kvs-5	Ion_trans domain-containing protein	WBGene00021948	-0.149	0.447	0.363	-0.595	-0.512	0.083		up	up	down	down
Q9U287	CELE_Y48C3A.20	tRNA pseudouridine(55) synthase	WBGene00012998	1.072	0.254	-0.082	0.818	1.154	0.336	up			up	up
O16785	pat-6	Paralyzed arrest at two-fold protein 6	WBGene00003932	-0.181	0.139	0.019	-0.32	-0.2	0.12	down			down	down
Q22782	rab-6.2	Ras-related protein rab-6.2	WBGene00004270	-0.348	0.238	0.007	-0.586	-0.356	0.23	down			down	down
Q20507	acbp-3	Acyl-CoA-binding protein homolog 3	WBGene00009818	-0.122	0.449	0.092	-0.571	-0.213	0.357		up		down		up
Q9XXA2	ebp-2	Microtubule End Binding Protein	WBGene00012156	-0.289	0.214	0.02	-0.503	-0.308	0.195	down			down	down
P90747	catp-8	Probable manganese-transporting ATPase catp-8	WBGene00007514	-0.331	0.145	-0.185	-0.475	-0.146	0.329	down			down		up
Q9NA33	CELE_Y73F8A.26	Uncharacterized protein	WBGene00013531	-0.484	0.186	-0.014	-0.67	-0.47	0.2	down			down	down
Q06561	unc-52	Basement membrane proteoglycan	WBGene00006787	-0.063	0.132	0.08	-0.195	-0.143	0.052		up		down	down
Q22129	CELE_T03G6.3	Uncharacterized protein	WBGene00020195	-0.268	0.093	0.107	-0.362	-0.376	-0.014	down			down	down
Q8MPS3	sek-3	Protein kinase domain-containing protein	WBGene00022613	-0.479	0.245	-0.053	-0.724	-0.426	0.298	down			down	down
Q93568	CELE_F25H2.4	MPN domain-containing protein	WBGene00009118	-0.438	0.176	0.007	-0.615	-0.445	0.17	down			down	down
G5EFP3	mrp-4	Uncharacterized protein	WBGene00003410	-0.332	0.11	0.221	-0.442	-0.553	-0.11	down			down	down
P34480	F59B2.3	N-acetylglucosamine-6-phosphate deacetylase	WBGene00010308	-0.725	-0.28	0.181	-0.445	-0.906	-0.461	down	down		down	down	down
Q17703	stdh-1	Putative steroid dehydrogenase 1	WBGene00007363	-0.525	0.066	0.269	-0.591	-0.794	-0.203	down			down	down
Q23402	ZK1127.4	Protein BCCIP homolog	WBGene00022851	1.609	0.512	0.185	1.097	1.423	0.326	up			up	up
Q17657	C05D12.2	Uncharacterized protein	WBGene00007340	-0.435	0.239	-0.016	-0.674	-0.419	0.256	down			down	down
O02161	tin-44	Probable mitochondrial import inner membrane translocase subunit tin-44	WBGene00020383	-0.342	0.047	-0.407	-0.389	0.065	0.454	down		down	down		up
Q9GYI7	CELE_F29B9.8	Uncharacterized protein	WBGene00017923	-0.361	0.212	0.276	-0.573	-0.637	-0.064	down			down	down
Q21266	cest-17	Carboxylic ester hydrolase	WBGene00019477	-0.341	0.072	0.075	-0.413	-0.416	-0.003	down			down	down
G5EEV5	pud-3	5C820	WBGene00017501	-0.271	1.651	2.947	-1.921	-3.217	-1.296		up	up	down	down	down
O17939	aipl-1	WD_REPEATS_REGION domain-containing protein	WBGene00010685	-0.392	-0.03	0.005	-0.361	-0.397	-0.036	down			down	down
Q9U1X0	CELE_Y62E10A.6	NADPH:adrenodoxin oxidoreductase, mitochondrial	WBGene00013376	-0.55	0.183	-0.283	-0.733	-0.267	0.466	down			down		up
P91148	ndx-7	Putative nudix hydrolase 7	WBGene00003584	-0.339	0.073	-0.292	-0.412	-0.048	0.364	down		down	down		up
D0Z5P0	sql-1	Suppressor of gpa-3QL dye-filling defect	WBGene00013730	-0.497	0.091	0.064	-0.588	-0.561	0.028	down			down	down
Q9BI71	epn-1	ENTH domain-containing protein	WBGene00001329	-0.188	0.046	0.03	-0.234	-0.218	0.016	down			down	down
Q9XTQ5	gob-1	Trehalose-phosphatase	WBGene00001649	-0.501	-0.066	-0.065	-0.435	-0.437	-0.002	down			down	down
Q9XX00	sbp-1	BHLH domain-containing protein	WBGene00004735	-0.336	0.155	-0.028	-0.491	-0.308	0.183	down			down	down
A0A1X7RBP4	CELE_ZK1193.2	VWFA domain-containing protein	WBGene00022858	-0.275	0.228	0.482	-0.502	-0.757	-0.255	down		up	down	down
G5EFM7	CELE_F18C12.3	Serum response factor-binding protein 1	WBGene00008934	1.364	0.378	0.383	0.985	0.981	-0.005	up			up	up
Q9NAB1	gst-29	Glutathione S-Transferase	WBGene00001777	-0.278	0.393	0.237	-0.671	-0.515	0.156		up		down	down
O76672	CELE_H34I24.2	Uncharacterized protein	WBGene00019261	-0.561	-0.005	-0.131	-0.555	-0.43	0.126	down			down	down
Q95PZ2	micu-1	Calcium uptake protein 1 homolog, mitochondrial	WBGene00013462	-0.399	0.194	0.009	-0.593	-0.408	0.185	down			down	down
Q19775	ppm-1.A	Protein phosphatase ppm-1.A	WBGene00006460	-0.111	0.082	0.009	-0.192	-0.12	0.073	down			down	down
Q21284	CELE_K07E3.4	Formate--tetrahydrofolate ligase	WBGene00019492	-0.213	0.025	-0.153	-0.238	-0.06	0.178	down		down	down		up
O01734	C09D4.2	DUF4773 domain-containing protein	WBGene00015633	-0.529	0.222	-0.004	-0.751	-0.525	0.226	down			down	down
O17731	D2023.4	Thialysine N-epsilon-acetyltransferase	WBGene00008408	-0.271	0.177	-0.182	-0.448	-0.089	0.359	down			down		up
Q966I8	pbs-1	Proteasome subunit beta	WBGene00003947	-0.243	0.302	-0.006	-0.544	-0.237	0.307				down		up
Q19416	dylt-1	DYnein Light chain (Tctex type)	WBGene00008764	0.216	-0.196	-0.012	0.412	0.228	-0.184	up			up	up
O45924	bckd-1A	2-oxoisovalerate dehydrogenase subunit alpha, mitochondrial	WBGene00012713	-0.222	-0.035	-0.241	-0.187	0.019	0.206	down		down	down		up
Q21084	slc-25a32	SLC (SoLute Carrier) homolog	WBGene00010459	0.642	-0.015	-0.061	0.658	0.704	0.046	up			up	up
K8FDY0	hpo-34	Uncharacterized protein	WBGene00009259	-0.332	0.048	-0.025	-0.38	-0.307	0.073	down			down	down
Q21549	gss-1	Glutathione synthetase	WBGene00010941	-0.208	0.08	-0.078	-0.289	-0.13	0.159	down			down	down	up
Q93841	acl-1	Putative 1-acyl-sn-glycerol-3-phosphate acyltransferase acl-1	WBGene00010339	-0.318	0.224	-0.165	-0.541	-0.152	0.389	down			down		up
P92016	cest-1.2	Carboxylic ester hydrolase	WBGene00011364	-0.162	0.499	0.311	-0.661	-0.473	0.188		up		down	down
Q18032	C15H9.9	Uncharacterized protein	WBGene00015803	-0.979	-0.186	-0.054	-0.793	-0.926	-0.132	down			down	down
Q9XTW2	famk-1	Extracellular serine/threonine protein kinase CeFam20	WBGene00010356	-0.462	0.188	0.069	-0.65	-0.531	0.119	down			down	down
O01812	lbp-6	Fatty acid-binding protein homolog 6	WBGene00002258	-0.42	-0.118	-0.483	-0.302	0.063	0.365	down		down	down		up
Q21742	CELE_R05F9.6	Phosphoglucomutase (alpha-D-glucose-1,6-bisphosphate-dependent)	WBGene00019890	-0.067	0.177	0.032	-0.245	-0.099	0.145		up		down		up
O45405	exl-1	Chloride intracellular channel exl-1	WBGene00001371	-0.277	0.212	0.207	-0.49	-0.484	0.005	down			down	down
O01813	ant-1.2	ADP/ATP translocase	WBGene00007057	-2.585	0.497	-0.829	-3.081	-1.756	1.326	down			down	down
Q9XVJ3	qdpr-1	Quinoid DihydroPteridine Reductase	WBGene00011398	0.234	-0.232	-0.052	0.466	0.287	-0.179	up			up	up
O44466	test-1	Thyroglobulin type-1 domain-containing protein	WBGene00016918	0.523	-0.113	-0.098	0.636	0.621	-0.015	up			up	up
O01826	C53H9.2	CP-type G domain-containing protein	WBGene00016907	0.431	0.069	0.219	0.363	0.213	-0.15	up		up	up	up
Q18773	C52B11.5	Uncharacterized protein	WBGene00016874	-0.726	0.464	-0.057	-1.19	-0.668	0.521	down			down	down
G5EFP8	acl-7	Dihydroxyacetone phosphate acyltransferase	WBGene00012911	-0.495	0.038	0.018	-0.532	-0.512	0.02	down			down	down
O76430	C24B9.3	Uncharacterized protein	WBGene00016048	-0.708	0.095	-0.226	-0.803	-0.483	0.321	down			down	down
Q18508	mel-28	Protein mel-28	WBGene00003210	-0.413	0.169	0.024	-0.581	-0.436	0.145	down			down	down
Q20992	acox-3	Acyl-coenzyme A oxidase acox-3	WBGene00019060	-0.36	-0.012	0.077	-0.348	-0.437	-0.089	down			down	down
Q9NAG5	CELE_Y48C3A.3	Uncharacterized protein	WBGene00012987	-0.381	0.143	0.068	-0.524	-0.449	0.075	down			down	down
G5EBF3	pud-2.1	Protein Up-regulated in Daf-2(Gf)	WBGene00017490;WBGene00017500	0.072	1.406	1.955	-1.334	-1.882	-0.548		up	up	down	down
O17685	C49F5.7	Uncharacterized protein	WBGene00008211	-0.054	0.72	0.692	-0.774	-0.746	0.028		up	up	down	down
Q18705	C49C8.5	Fibrinogen C-terminal domain-containing protein	WBGene00016769	-0.551	0.007	-0.277	-0.557	-0.273	0.284	down			down	down
O17636	ethe-1	Lactamase_B domain-containing protein	WBGene00007886	-0.484	-0.122	-0.177	-0.362	-0.307	0.056	down			down	down
G5EEI1	lgl-1	LGL-1	WBGene00018987	-0.396	0.393	0.03	-0.789	-0.425	0.363	down			down	down
Q9N2W7	Y94H6A.8	Probable NADH dehydrogenase [ubiquinone] 1 alpha subcomplex subunit 12	WBGene00022380	0.389	-0.057	0.597	0.445	-0.209	-0.654	up		up	up	down	down
Q18853	cyc-1	Cytochrome c domain-containing protein	WBGene00000869	0.343	-0.1	0.02	0.443	0.323	-0.12	up			up	up
Q9XU92	CELE_F57G8.7	Uncharacterized protein	WBGene00010216	1.797	0.137	0.997	1.66	0.8	-0.86	up		up	up	up
G5EDV0	CELE_E01G4.6	Uncharacterized protein	WBGene00008448	-0.023	0.677	0.082	-0.7	-0.105	0.595		up		down		up
O45182	CELE_K07H8.2	Uncharacterized protein	WBGene00019504	0.169	-0.25	-0.103	0.419	0.272	-0.147		down		up	up
Q6A4V9	C05D12.3	EGF-like domain-containing protein	WBGene00014666	-0.487	0.2	-0.183	-0.686	-0.303	0.383	down			down		up
Q9TXI3	did-2	Doa4-Independent Degradation, homologous to yeast Did2	WBGene00017735	-0.539	0.175	-0.033	-0.714	-0.506	0.208	down			down	down
G5EEE5	elo-1	Elongation of long chain fatty acids protein 1	WBGene00001239	-0.408	0.179	-0.112	-0.587	-0.297	0.291	down			down	down
Q18075	C18B2.4	GRAM domain-containing protein	WBGene00015955	-0.548	-0.053	-0.096	-0.494	-0.452	0.043	down			down	down
Q9BL48	set-27	Protein-histidine N-methyltransferase	WBGene00022173	0.521	0.156	0.12	0.365	0.401	0.036	up			up	up
P90795	gpdh-3	Probable glycerol-3-phosphate dehydrogenase, mitochondrial	WBGene00012031	-0.134	0.095	0.111	-0.229	-0.246	-0.017	down			down	down
Q21810	CELE_R07E3.1	Uncharacterized protein	WBGene00011102	-0.276	0.165	0.188	-0.44	-0.463	-0.023	down			down	down
Q03577	dars-1	Aspartate--tRNA ligase, cytoplasmic	WBGene00001094	0.378	0.15	0.043	0.228	0.335	0.107	up	up		up	up
O45060	C35B1.5	Thioredoxin domain-containing protein	WBGene00016435	-0.474	-0.16	-0.614	-0.314	0.14	0.454	down		down	down		up
G5ECH7	cdk-5	Cyclin-dependent-like kinase 5	WBGene00000407	-0.738	0.427	-0.034	-1.165	-0.704	0.461	down			down	down
Q18885	icd-1	Transcription factor BTF3 homolog	WBGene00002045	0.399	0.087	-0.006	0.312	0.405	0.093	up			up	up
Q9BL46	CELE_Y71H2AM.11	M20_dimer domain-containing protein	WBGene00022176	0.23	-0.004	0.149	0.233	0.081	-0.153	up		up	up		down
Q22192	ttr-14	TransThyretin-Related family domain	WBGene00011460	-0.879	-0.138	-0.516	-0.742	-0.363	0.378	down		down	down	down
Q09364	ZK1320.2	Uncharacterized protein ZK1320.2	WBGene00014252	-1.302	-0.306	-0.543	-0.996	-0.76	0.237	down			down	down
P46576	gop-3	SAM50-like protein gop-3	WBGene00001662	-0.227	-0.004	-0.148	-0.223	-0.079	0.144	down		down	down		up
P91353	mrpl-24	Probable 39S ribosomal protein L24, mitochondrial	WBGene00019076	0.282	-0.064	-0.313	0.347	0.595	0.248	up		down	up	up	up
Q18115	rpn-2	26S proteasome non-ATPase regulatory subunit 1	WBGene00004459	-0.173	0.155	0.001	-0.328	-0.174	0.154	down			down	down
Q22643	ttr-23	TransThyretin-Related family domain	WBGene00011894	-0.281	0.508	0.293	-0.789	-0.574	0.215		up		down	down
Q5WRR1	wrk-1	Wrapper/Rega-1/Klingon homolog	WBGene00006942	-0.415	0.121	-0.078	-0.535	-0.336	0.199	down			down	down
Q09517	let-767	Very-long-chain 3-oxooacyl-coA reductase let-767	WBGene00002891	-0.278	0.08	-0.038	-0.358	-0.241	0.118	down			down	down
O16458	vps-60	Related to yeast Vacuolar Protein Sorting factor	WBGene00018290	-0.428	0.184	0.065	-0.612	-0.493	0.119	down			down	down
O45667	dod-17	CUB_2 domain-containing protein	WBGene00010745	-0.553	0.244	-0.493	-0.797	-0.06	0.736	down		down	down		up
A0A1N7SYP3	vab-10	GAR domain-containing protein	WBGene00006876	-0.296	-0.015	-0.008	-0.28	-0.287	-0.007	down			down	down
Q11087	acl-12	Putative 1-acyl-sn-glycerol-3-phosphate acyltransferase acl-12	WBGene00015295	-1.356	-0.102	-0.055	-1.254	-1.301	-0.047	down			down	down
P91230	CELE_F08D12.7	Uncharacterized protein	WBGene00017250	-0.203	0.654	0.065	-0.857	-0.268	0.589		up		down		up
P34686	cap-2	F-actin-capping protein subunit beta	WBGene00000293	-0.339	0.108	0.056	-0.447	-0.395	0.052	down			down	down
G5EDN6	cnb-1	Protein phosphatase 2B regulatory subunit cnb-1	WBGene00000554	-0.427	0.249	0.084	-0.676	-0.511	0.165	down			down	down
O76565	F13C5.5	Uncharacterized protein F13C5.5	WBGene00017426	-1.053	1.029	-0.238	-2.082	-0.815	1.266	down			down		up
P48376	clk-1	5-demethoxyubiquinone hydroxylase, mitochondrial	WBGene00000536	-0.406	0.004	-0.274	-0.41	-0.132	0.278	down		down	down		up
O45078	C17H12.8	CUB_2 domain-containing protein	WBGene00015933	-0.386	0.247	0	-0.633	-0.386	0.247	down			down	down
Q9N2U6	lmtr-2	Ragulator complex protein LAMTOR2 homolog	WBGene00022402	-0.389	0.392	-0.056	-0.781	-0.333	0.447	down			down		up
Q09393	CELE_F42G10.1	Uncharacterized protein	WBGene00009645	-0.189	0.045	0	-0.234	-0.189	0.045	down			down	down
A0A2C9C2Y0	unc-108	Uncharacterized protein	WBGene00006833	-0.23	0.085	-0.024	-0.315	-0.206	0.11	down			down	down
Q17938	daf-36	Cholesterol 7-desaturase	WBGene00007536	-0.345	-0.003	-0.02	-0.342	-0.326	0.017	down			down	down
Q94053	msp-78	Major sperm protein 78	WBGene00003465	1.178	0.201	0.193	0.978	0.986	0.008	up			up	up
Q20560	CELE_F48D6.4	Uncharacterized protein	WBGene00018602	-0.492	0.431	0.371	-0.923	-0.863	0.06	down			down	down
P34645	ZK512.7	Uncharacterized protein ZK512.7	WBGene00013986	0.346	-0.002	-0.028	0.349	0.374	0.025	up			up	up
P34642	ZK512.4	Signal recognition particle 9 kDa protein	WBGene00013984	-0.489	0.983	0.028	-1.472	-0.516	0.955		up		down		up
G4SRS5	abtm-1	ABC Transporter, Mitochondrial	WBGene00022281	0.188	-0.09	-0.203	0.278	0.39	0.112	up		down	up	up
O01862	CELE_T05E7.1	Uncharacterized protein	WBGene00020258	-0.171	0.437	0.297	-0.608	-0.468	0.14		up		down	down
Q21004	amph-1	AMPHiphysin homolog	WBGene00010272	-0.329	0.011	-0.158	-0.34	-0.172	0.168	down			down	down
Q7JNG1	atp-3	ATP synthase subunit O, mitochondrial	WBGene00000230	-0.203	0.107	-0.059	-0.31	-0.144	0.166	down			down	down
P34454	F54F2.9	Uncharacterized protein F54F2.9	WBGene00018836	0.214	-0.134	0.003	0.348	0.21	-0.138	up			up	up
Q09544	F58F12.1	ATP synthase subunit delta, mitochondrial	WBGene00019061	-0.355	0.354	-0.132	-0.709	-0.223	0.487	down			down		up
O62305	unc-43	Calcium/calmodulin-dependent protein kinase type II	WBGene00006779	-0.348	0.186	0.081	-0.534	-0.429	0.105	down			down	down
G5EFF9	eif-2bdelta	Eukaryotic Initiation Factor	WBGene00008670	-0.169	0.504	0.105	-0.673	-0.274	0.399		up		down		up
Q7JPE4	CELE_T24H7.9	GyrI-like domain-containing protein	WBGene00305157	-0.398	-0.065	0.17	-0.333	-0.568	-0.235	down			down	down	down
Q86NE0	asp-2	Peptidase A1 domain-containing protein	WBGene00000215	-0.676	-0.051	-0.623	-0.624	-0.053	0.572	down		down	down		up
Q965W8	gid-7	WD_REPEATS_REGION domain-containing protein	WBGene00021482	-0.461	0.021	-0.106	-0.482	-0.355	0.127	down			down	down
Q19246	dhs-25	DeHydrogenases, Short chain	WBGene00000988	0.45	-0.041	-0.424	0.491	0.874	0.383	up		down	up	up	up
G5EDP2	daf-22	Non-specific lipid-transfer protein-like 2	WBGene00013284	-0.278	0.007	0.088	-0.285	-0.366	-0.081	down			down	down
A0A2K5ATR7	ubc-26	UBC core domain-containing protein	WBGene00022450	-0.523	0.098	-0.016	-0.621	-0.507	0.114	down			down	down
Q20086	ugt-58	Putative UDP-glucuronosyltransferase ugt-58	WBGene00009450	-0.173	0.125	-0.026	-0.298	-0.147	0.151	down			down	down
Q17542	cest-5.2	Carboxyl ESTerase domain containing	WBGene00015284	-0.408	-0.003	0.089	-0.404	-0.497	-0.092	down			down	down
B7FAR9	CELE_Y43F8B.1	Uncharacterized protein	WBGene00012812	-0.113	0.13	0.017	-0.243	-0.13	0.113				down	down
Q95NU5	ooc-5	Torsin-like protein	WBGene00003870	-0.335	0.144	0.077	-0.479	-0.412	0.068	down			down	down
H2KYP2	ncx-2	Na_Ca_ex domain-containing protein	WBGene00003567	-0.16	0.24	0.18	-0.4	-0.34	0.06		up		down	down
Q22579	CELE_T19D12.1	Uncharacterized protein	WBGene00020576	-0.404	0.348	-0.103	-0.752	-0.301	0.451	down			down		up
Q09652	gstk-1	Glutathione S-transferase kappa 1	WBGene00014251	-0.447	0.127	0.258	-0.574	-0.705	-0.131	down			down	down
Q8MYM9	Y39B6A.34	COA8 family protein Y39B6A.34, mitochondrial	WBGene00012693	0.458	-0.242	-0.495	0.7	0.953	0.253	up		down	up	up
Q22566	best-17	Bestrophin homolog 17	WBGene00020559	0.469	-0.137	0.121	0.606	0.347	-0.259	up			up	up
Q9TXQ1	tank-1	Poly [ADP-ribose] polymerase tankyrase	WBGene00004053	-0.336	-0.034	-0.002	-0.301	-0.334	-0.032	down			down	down
Q9XTU6	snr-6	Probable small nuclear ribonucleoprotein E	WBGene00004919	0.23	-0.123	-0.027	0.353	0.257	-0.096	up			up	up
O02155	CELE_T09B4.5	Uncharacterized protein	WBGene00020379	-0.228	0.293	0.087	-0.52	-0.315	0.205				down	down
Q23526	CELE_ZK546.2	Uncharacterized protein	WBGene00022759	-0.246	-0.026	-0.044	-0.219	-0.201	0.018	down			down	down
Q20107	fkb-1	Peptidylprolyl isomerase	WBGene00001426	-0.374	0.082	-0.237	-0.456	-0.137	0.319	down			down		up
Q27539	clpp-1	ATP-dependent Clp protease proteolytic subunit 1, mitochondrial	WBGene00014172	-0.526	0.006	-0.335	-0.532	-0.191	0.341	down		down	down		up
Q9NAK5	clec-4	C-type LECtin	WBGene00012583	-0.773	0.411	-1.236	-1.185	0.462	1.647	down		down	down		up
Q20959	CELE_F58A6.1	Uncharacterized protein	WBGene00019022	-0.534	0.329	-0.093	-0.863	-0.441	0.422	down			down	down
Q9BKR3	CELE_Y47A7.2	Uncharacterized protein	WBGene00021614	1.032	-0.296	0.028	1.328	1.005	-0.323	up			up	up
O62334	agl-1	Glycogen debranching enzyme	WBGene00011050	0.179	-0.072	-0.012	0.251	0.191	-0.06	up			up	up
Q3Y403	C41G11.1	Metallophos domain-containing protein	WBGene00016568	-0.535	0.283	-0.033	-0.818	-0.502	0.316	down			down	down
Q23126	metl-1	tRNA (guanine-N(7)-)-methyltransferase	WBGene00012205	0.534	-0.061	0.273	0.595	0.261	-0.334	up			up		down
Q9XUP3	eif-3.K	Eukaryotic translation initiation factor 3 subunit K	WBGene00001233	0.279	-0.014	0	0.293	0.278	-0.014	up			up	up
O45417	CELE_F31D4.2	Sugar phosphate phosphatase	WBGene00009290	-0.311	0.011	-0.021	-0.321	-0.289	0.032	down			down	down
O45346	osm-11	Notch ligand osm-11	WBGene00003891	-0.353	0.494	0.169	-0.847	-0.522	0.324				down	down
Q20376	ech-3	Enoyl-CoA Hydratase	WBGene00001152	-0.377	0.351	0.056	-0.729	-0.433	0.295	down			down	down
Q09510	mlc-4	Myosin regulatory light chain	WBGene00003372	-0.614	-0.173	-0.234	-0.441	-0.38	0.061	down			down	down
Q9GYU3;Q9TXS4	CELE_F35F10.5	Uncharacterized protein	WBGene00018055	-0.422	0.243	0.146	-0.665	-0.568	0.097	down			down	down
Q21525	taap-1	TAil-Anchored Protein	WBGene00010879	0.278	-0.165	-0.095	0.443	0.373	-0.07	up			up	up
O17759	tkt-1	Transket_pyr domain-containing protein	WBGene00008506	-0.159	-0.002	-0.173	-0.157	0.015	0.171	down		down	down		up
G5ECR8	gba-3	Putative glucosylceramidase 3	WBGene00008706	-0.385	0.559	0.044	-0.944	-0.429	0.515				down
Q9NCE1	mboa-2	O-acyltransferase	WBGene00010408	-0.517	0.077	0.126	-0.594	-0.643	-0.049	down			down	down
P53596	sucl-1	Succinate--CoA ligase [ADP/GDP-forming] subunit alpha, mitochondrial	WBGene00007350	-0.215	0.063	-0.08	-0.279	-0.135	0.144	down			down	down
Q21174	CELE_K03B4.1	Uncharacterized protein	WBGene00019353	-0.452	0.086	-0.254	-0.538	-0.199	0.339	down			down		up
O44195	CELE_ZK185.3	Uncharacterized protein	WBGene00022683	-0.186	0.18	-0.101	-0.367	-0.086	0.281	down			down		up
Q9U2F6	vps-2	Related to yeast Vacuolar Protein Sorting factor	WBGene00012903	-0.253	0.091	-0.042	-0.344	-0.212	0.133	down			down	down
Q967F1	eif-1	SUI1 domain-containing protein	WBGene00020868	0.191	-0.241	-0.064	0.432	0.254	-0.178				up	up
Q18211	ran-3	Regulator of chromosome condensation	WBGene00004304	-0.16	0.179	-0.023	-0.339	-0.137	0.201				down		up
G5EFC8	dap-3	Mammalian cell Death Associated Protein related	WBGene00000933	0.42	0.009	-0.107	0.411	0.527	0.116	up			up	up
G5EBE7	catp-1	Cation transporting ATPase	WBGene00013672	-0.337	0.78	0.355	-1.117	-0.692	0.425		up		down	down
Q9XUW5	ddx-17	RNA helicase	WBGene00010260	0.651	0.319	0.277	0.332	0.374	0.042	up	up	up	up	up
H2KYG6	C05D9.9	Uncharacterized protein	WBGene00015476	-0.243	0.363	0.315	-0.606	-0.557	0.048				down	down
Q20203	csq-1	Calsequestrin	WBGene00000822	-0.172	0.229	0.081	-0.401	-0.253	0.148				down	down
Q9U1Y6	dhs-24	DeHydrogenases, Short chain	WBGene00000987	0.221	-0.069	-0.191	0.29	0.412	0.122	up		down	up	up
Q20164	hsp-12.3	SHSP domain-containing protein	WBGene00002012	0.191	-0.365	0.054	0.556	0.137	-0.419		down		up		down
Q17971	C14C10.5	Uncharacterized protein	WBGene00007588	-0.238	0.098	0.069	-0.336	-0.307	0.029	down			down	down
P46563	aldo-2	Fructose-bisphosphate aldolase 2	WBGene00017166	-0.383	-0.117	-0.181	-0.266	-0.202	0.064	down		down	down	down
Q9TZM9	tag-343	RNA polymerase II-associated factor 1 homolog	WBGene00018374	-0.224	0.341	0.178	-0.565	-0.402	0.163				down	down
Q9NEZ8	ech-7	Enoyl-CoA Hydratase	WBGene00001156	-0.542	0	0.245	-0.541	-0.786	-0.245	down			down	down
Q9NF11	hprt-1	Hypoxanthine phosphoribosyltransferase	WBGene00013690	-0.261	0.1	-0.075	-0.36	-0.186	0.175	down			down	down
G5EGB3	ragc-1	RAs-related GTP binding protein C homolog	WBGene00012497	-0.261	0.113	0.073	-0.374	-0.334	0.04	down			down	down
O61826	fkb-7	Peptidylprolyl isomerase	WBGene00001432	0.168	-0.33	-0.133	0.498	0.301	-0.197		down		up	up
Q09216	B0495.7	Putative endoplasmic reticulum metallopeptidase 1-A	WBGene00015206	-0.208	0.113	-0.132	-0.322	-0.077	0.245	down			down		up
Q09313	dct-6	Protein dct-6	WBGene00017773	-0.213	0.164	0.148	-0.376	-0.36	0.016	down			down	down
Q9XU45	B0379.1	Uncharacterized protein	WBGene00007155	-0.127	0.329	0.053	-0.456	-0.18	0.276		up		down		up
P50306	sams-4	Probable S-adenosylmethionine synthase 4	WBGene00015540	-0.262	-0.688	-0.286	0.426	0.024	-0.402	down	down	down	up		down
Q9XTY6	num-1	Numb-related protein 1	WBGene00003830	1.236	-0.165	0.177	1.4	1.059	-0.342	up			up	up
O02252	pcp-3	Prolyl Carboxy Peptidase like	WBGene00003958	-0.181	0.15	0.398	-0.332	-0.58	-0.248	down		up	down	down	down
Q18012	bbln-1	Bulges Budding from the intestinal LumeN	WBGene00015791	0.137	-0.388	-0.216	0.525	0.353	-0.172		down		up	up
Q20974	CELE_F58B4.5	CHK domain-containing protein	WBGene00010238	-0.765	-0.351	-1.253	-0.415	0.488	0.903	down	down	down	down	up	up
Q22031	R74.7	Putative tRNA (cytidine(32)/guanosine(34)-2'-O)-methyltransferase	WBGene00011281	0.526	-0.045	0.047	0.57	0.479	-0.092	up			up	up
Q7Z072	tnt-2	TropoNin T	WBGene00006587	0.097	0.297	0.143	-0.201	-0.046	0.155		up	up	down		up
G5EFJ8	pcp-2	Prolyl Carboxy Peptidase like	WBGene00003957	-0.298	0.185	-0.219	-0.483	-0.08	0.404	down			down		up
E8MDW0	CELE_Y116A8C.30	Uncharacterized protein	WBGene00013807	-0.294	0.047	-0.234	-0.342	-0.061	0.281	down		down	down		up
Q22945	CELE_F08F3.4	Epimerase domain-containing protein	WBGene00017262	-1.021	-0.14	-1.342	-0.882	0.32	1.202	down		down	down		up
P83386	CELE_F28H1.4	MARVEL domain-containing protein	WBGene00017909	-0.992	0.041	-0.285	-1.033	-0.706	0.326	down			down	down
Q19191	F08B12.4	Uncharacterized protein F08B12.4	WBGene00008572	0.744	0.277	0.312	0.468	0.432	-0.036	up		up	up	up
A0A8D9MJW7	clh-1	Chloride channel protein		-0.351	0.043	0.152	-0.394	-0.504	-0.11	down			down	down
A0A131MBF9	imb-2	Importin N-terminal domain-containing protein	WBGene00002076	-0.333	0.274	0.117	-0.607	-0.45	0.157	down			down	down
Q23314	ZC434.4	Ribosomal RNA-processing protein 7 homolog	WBGene00013892	1.213	0.116	0.384	1.097	0.829	-0.268	up			up	up
P91913	rla-1	60S acidic ribosomal protein P1	WBGene00004409	0.29	-0.117	-0.047	0.407	0.337	-0.07	up			up	up
Q95Y26	ptpn-22	Tyrosine-protein phosphatase	WBGene00021507	-0.299	-0.056	0.06	-0.242	-0.359	-0.116	down			down	down
O45757	CELE_T06E6.1	Uncharacterized protein	WBGene00011538	1.258	0.263	0.133	0.995	1.125	0.13	up			up	up
Q7JLH5	pqn-70	Prion-like-(Q/N-rich)-domain-bearing protein	WBGene00004152	0.569	-0.464	0.238	1.033	0.331	-0.703	up			up		down
Q5ZR77	CELE_R02F11.3	ZT_dimer domain-containing protein	WBGene00019841	-0.529	0.111	0.046	-0.64	-0.575	0.065	down			down	down
Q21182	CELE_K03B8.6	Uncharacterized protein	WBGene00010524	-0.418	0.088	-0.063	-0.506	-0.355	0.151	down			down	down
Q7YWV0	CELE_T01E8.8	Uncharacterized protein	WBGene00011335	1.196	-0.059	0.055	1.255	1.141	-0.114	up			up	up
Q18600	C44B7.11	Putative endoplasmic reticulum metallopeptidase 1-B	WBGene00016631	-0.66	-0.035	-0.154	-0.625	-0.505	0.119	down			down	down
Q19834	aat-1	Amino Acid Transporter	WBGene00000002	-0.62	0	0.171	-0.62	-0.791	-0.171	down			down	down
G5ECJ8	fmo-3	Flavin-containing monooxygenase	WBGene00001478	0.643	0.244	0.18	0.4	0.464	0.064	up			up	up
Q17740	ain-1	ALG-1 INteracting protein	WBGene00015547	-0.155	0.093	0.075	-0.248	-0.23	0.018	down			down	down
Q23588	upp-1	Uridine and thymidine phosphorylase	WBGene00022817	-0.237	0.291	-0.063	-0.529	-0.175	0.354				down		up
P58798	arx-6	Probable actin-related protein 2/3 complex subunit 4	WBGene00000204	-0.373	0.129	-0.161	-0.502	-0.212	0.291	down			down		up
Q19660	CELE_F21C10.10	Uncharacterized protein	WBGene00017659	-0.328	0.12	-0.138	-0.448	-0.19	0.257	down			down
Q2L6V4	CELE_K11H12.11	Uncharacterized protein	WBGene00044723	-0.387	0.525	0.376	-0.912	-0.763	0.149				down	down
Q17871	C09G9.1	Uncharacterized protein	WBGene00007492	-0.576	0.105	-0.21	-0.681	-0.366	0.315	down			down	down
Q09512	ttll-12	Tubulin--tyrosine ligase-like protein 12	WBGene00008405	0.414	0.06	0.113	0.354	0.3	-0.054	up			up	up
P41932	par-5	14-3-3-like protein 1	WBGene00003920	-0.08	0.223	0.029	-0.303	-0.108	0.195		up		down		up
Q8WQC0	rgs-7	Regulator of G-protein signaling rgs-7	WBGene00004350	0.912	-0.548	0.076	1.461	0.836	-0.624	up			up	up
G5ECW3	ehbp-1	EH (Eps-15-homology) domain Binding Protein family	WBGene00009098	-0.318	0.02	0.046	-0.338	-0.364	-0.026	down			down	down
Q95XR0	eif-2gamma	Protein-synthesizing GTPase	WBGene00021466	0.334	0.07	0.075	0.264	0.259	-0.005	up			up	up
A0A1I6CM73	C40H1.7	Lipase_3 domain-containing protein	WBGene00008042	-0.632	-0.012	0.043	-0.62	-0.676	-0.056	down			down	down
P18947	vit-4	Vitellogenin-4	WBGene00006928	-0.704	-0.17	0.251	-0.534	-0.955	-0.421	down			down	down	down
Q20282	col-139	Col_cuticle_N domain-containing protein	WBGene00000712	1.412	0.071	0.06	1.342	1.352	0.011	up			up	up
Q21408	spc-1	SPeCtrin	WBGene00004951	-0.105	0.066	0.082	-0.171	-0.187	-0.016	down			down	down
O44871	clec-150	C-type lectin domain-containing protein	WBGene00019914	-0.632	0.054	-0.146	-0.686	-0.486	0.2	down			down	down
B3WFZ3	C31H5.6	Uncharacterized protein	WBGene00007857	0.42	0.042	0.149	0.379	0.271	-0.107	up			up	up
O45730	pmp-4	Peroxisomal Membrane Protein related	WBGene00004061	-0.234	0.018	0.153	-0.252	-0.387	-0.135	down		up	down	down
O02220	mrpl-34	L51_S25_CI-B8 domain-containing protein	WBGene00007712	0.401	0.003	-0.289	0.398	0.69	0.292	up		down	up	up	up
Q9TZ58	CELE_K01A2.5	AB hydrolase-1 domain-containing protein	WBGene00019280	-0.301	0.136	0.137	-0.437	-0.438	-0.001	down			down	down
Q23312	rps-7	40S ribosomal protein S7	WBGene00004476	-0.379	0.481	-0.026	-0.861	-0.353	0.507				down		up
P90925	pah-1	Phenylalanine-4-hydroxylase	WBGene00000240	-0.188	0.097	0.02	-0.285	-0.208	0.076	down			down	down
A0A164D380	tbc-14	Rab-GAP TBC domain-containing protein	WBGene00008444	-0.282	0.053	-0.005	-0.335	-0.277	0.058	down			down	down
G5ECQ4	sth-1	Novel protein	WBGene00006060	-0.855	-0.158	-0.234	-0.697	-0.621	0.076	down			down	down
Q09165	dig-1	Mesocentin	WBGene00000998	-0.118	0.142	0.161	-0.26	-0.279	-0.018			up	down	down
O45903	W09H1.5	Enoyl-[acyl-carrier-protein] reductase, mitochondrial	WBGene00012375	-0.205	0.006	-0.126	-0.211	-0.08	0.131	down		down	down		up
Q21898	vha-1	V-type proton ATPase 16 kDa proteolipid subunit c 1	WBGene00006910	-0.333	0.628	0.079	-0.96	-0.411	0.549		up		down
Q9U1Z2	algn-7	UDP-N-acetylglucosamine--dolichyl-phosphate N-acetylglucosaminephosphotransferase	WBGene00013362	-0.847	1.001	-0.616	-1.848	-0.23	1.618				down		up
Q19329	tag-151	Pre-rRNA-processing protein TSR1 homolog	WBGene00006497	1.014	0.345	0.214	0.669	0.8	0.131	up			up	up
Q9N2Z7	wwp-1	E3 ubiquitin-protein ligase wwp-1	WBGene00007009	-0.291	0.069	0.221	-0.359	-0.512	-0.153	down		up	down	down
Q9XX10	CELE_Y39A1A.22	Uncharacterized protein	WBGene00012659	-0.311	0.027	0.093	-0.337	-0.404	-0.066	down			down	down
Q95ZI6	ZK353.9	PITH domain-containing protein ZK353.9	WBGene00022704	-0.253	0.178	0.01	-0.431	-0.263	0.168	down			down	down
P34630	cutc-1	Copper homeostasis protein cutC homolog	WBGene00022702	-0.352	0.196	-0.14	-0.548	-0.211	0.336	down			down		up
P18948	vit-6	Vitellogenin-6	WBGene00006930	-0.64	-0.224	-0.089	-0.416	-0.55	-0.134	down			down	down
Q564S3	CELE_F43D2.6	Uncharacterized protein	WBGene00044191	0.538	-0.411	0.02	0.949	0.517	-0.431	up			up	up
O45110	mrpl-2	Ribosomal_L2_C domain-containing protein	WBGene00018932	0.303	-0.074	-0.262	0.378	0.566	0.188	up		down	up	up
O01572	CELE_F48C1.6	Uncharacterized protein	WBGene00018599	0.144	-0.268	-0.372	0.411	0.516	0.104		down	down	up	up
Q9XVR5	C30H6.9	Uncharacterized protein	WBGene00007826	-0.618	0.294	-0.086	-0.912	-0.532	0.38	down			down	down
Q19877	rps-23	40S ribosomal protein S23	WBGene00004492	0.104	-0.212	0.038	0.316	0.066	-0.25		down		up		down
Q95ZS6	rfip-1	FIP-RBD domain-containing protein	WBGene00018869	1.076	-0.076	0.105	1.152	0.97	-0.181	up			up	up
Q27464	gspd-1	Glucose-6-phosphate 1-dehydrogenase	WBGene00007108	-0.195	0.033	-0.018	-0.228	-0.177	0.051	down			down	down
Q69Z12	mlc-7	Myosin Light Chain	WBGene00023451	-0.854	-0.45	-0.296	-0.405	-0.559	-0.154	down	down	down	down	down
Q9U3K1	CELE_F11A10.6	Uncharacterized protein	WBGene00008687	-0.577	0.113	-0.017	-0.691	-0.56	0.13	down			down	down
Q9N5F6	CELE_R193.2	Uncharacterized protein	WBGene00020128	-0.586	-0.275	-0.373	-0.311	-0.213	0.099	down	down	down	down	down
O17626	C31C9.2	Uncharacterized protein	WBGene00007836	-0.07	0.318	0.078	-0.388	-0.148	0.24		up		down		up
G5EF37	pat-10	Paralysed Arrest at Two-fold	WBGene00003934	-0.179	0.433	0.139	-0.612	-0.318	0.294		up		down	down
O01780	ule-1	Uterine Lumin Expressed/locailized	WBGene00021005	-2.202	-1.231	-1.51	-0.971	-0.691	0.279	down	down	down	down	down
E0AHA7	unc-70	Spectrin beta chain	WBGene00006803	-0.106	0.041	0.062	-0.146	-0.168	-0.022	down			down	down
Q23624	CELE_ZK829.7	PKS_ER domain-containing protein	WBGene00014096	-0.365	-0.029	-0.002	-0.336	-0.363	-0.027	down			down	down
P34654	ZK632.9	Uncharacterized protein ZK632.9	WBGene00014016	-0.592	0.62	0.238	-1.212	-0.83	0.382				down	down
Q9Y194	spl-1	Sphingosine-1-phosphate lyase	WBGene00004981	-0.298	-0.065	0.086	-0.233	-0.383	-0.15	down			down	down	down
Q18020	hrg-7	Aspartic protease 10	WBGene00007605	-0.844	-0.351	-0.517	-0.493	-0.327	0.166	down	down	down	down	down
Q20166	cpin-1	Amidohydro-rel domain-containing protein	WBGene00000775	-0.117	0.199	0.152	-0.315	-0.269	0.046				down	down
G5EDZ9	cpi-1	Cystatin cpi-1	WBGene00000535	0.179	-0.313	-0.243	0.492	0.423	-0.069		down		up	up
G5EGD6	ipla-3	Phospholipase A(2)	WBGene00012319	-0.146	0.29	0.144	-0.436	-0.29	0.146		up		down	down
O17861	F37H8.5	GILT-like protein F37H8.5	WBGene00009514	-0.183	0.192	0.037	-0.375	-0.219	0.155				down	down
Q17447	faah-2	Amidase domain-containing protein	WBGene00015048	-0.23	0.059	0.088	-0.289	-0.318	-0.029	down			down	down
Q6AHR3	CELE_R151.2	Ribose-phosphate diphosphokinase	WBGene00020107	-0.173	0.06	0.069	-0.233	-0.242	-0.009	down			down	down
Q18905	cgp-1	GTP-binding protein cgp-1	WBGene00000480	-0.239	0.068	0.091	-0.307	-0.329	-0.022	down			down	down
Q10929	abi-1	SH3 domain-containing protein	WBGene00015146	-0.347	0.23	0.088	-0.577	-0.434	0.143	down			down	down
O01805	acbp-1	Acyl-CoA-binding protein homolog 1	WBGene00016655	-0.238	0.132	0.052	-0.37	-0.29	0.08	down			down	down
Q9N361	mrps-25	Probable 28S ribosomal protein S25, mitochondrial	WBGene00021920	0.228	-0.108	0.554	0.336	-0.326	-0.662	up		up	up	down	down
C0HLB3;C0HLB4	vha-2	V-type proton ATPase 16 kDa proteolipid subunit c 2;V-type proton ATPase 16 kDa proteolipid subunit c 3	WBGene00006911	-0.276	0.152	0.054	-0.428	-0.329	0.098	down			down	down
P34885	pkc-1	Protein kinase C-like 1B	WBGene00004032	-0.521	0.301	0.106	-0.822	-0.628	0.195	down			down	down
Q21643	mop-25.1	MO25 (MOuse embryo scaffolding Protein) homolog	WBGene00019827	-0.379	0.063	0.171	-0.442	-0.55	-0.108	down			down	down
C2BR94	thoc-5	THO Complex (Transcription factor/nuclear export) subunit	WBGene00021311	-1.212	-0.17	-0.368	-1.042	-0.844	0.198	down			down	down
Q9XW79	pph-4.1	Serine/threonine-protein phosphatase 4 catalytic subunit 1	WBGene00004085	-0.272	0.312	0.041	-0.584	-0.313	0.27				down	down
P34466	clu-1	Clustered mitochondria protein homolog	WBGene00000550	0.227	-0.083	-0.483	0.31	0.71	0.4	up		down	up	up	up
O16520	erfa-1	Eukaryotic peptide chain release factor subunit 1	WBGene00020269	0.211	-0.012	0.161	0.224	0.05	-0.174	up		up	up		down
Q8T3C8	mtp-18	Mitochondrial fission process protein 1	WBGene00077690	-0.353	0.054	-0.323	-0.408	-0.031	0.377	down		down	down		up
Q19788	CELE_F25H8.2	H/ACA ribonucleoprotein complex non-core subunit NAF1	WBGene00009132	0.898	-0.16	-0.008	1.058	0.906	-0.152	up			up	up
Q23150	col-181	Col_cuticle_N domain-containing protein	WBGene00000754	0.572	0.082	-0.135	0.49	0.706	0.216	up			up	up
Q20752	stc-1	Heat shock 70 kDa protein 13	WBGene00006059	-0.412	-0.104	-0.131	-0.308	-0.281	0.027	down			down	down
Q94216	dnj-11	DnaJ homolog subfamily C member 2	WBGene00001029	0.619	0.041	0.061	0.577	0.557	-0.02	up			up	up
Q95XN2	mppa-1	Mitochondrial-processing peptidase subunit alpha	WBGene00022159	0.266	-0.049	-0.434	0.315	0.7	0.386	up		down	up	up	up
A5HWB2	CELE_Y39B6A.3	Fe-S_biosyn domain-containing protein	WBGene00012666	-0.404	-0.007	-0.568	-0.398	0.164	0.561	down		down	down		up
Q09316	F25B5.5	CDK5RAP1-like protein	WBGene00017776	1.332	0.123	-0.306	1.209	1.638	0.429	up			up	up
H2KZK7	dpf-3	Dipeptidyl Peptidase Four (IV) family	WBGene00001056	-0.245	-0.064	-0.124	-0.182	-0.122	0.06	down		down	down	down
Q20719	F53F4.10	Probable NADH dehydrogenase [ubiquinone] flavoprotein 2, mitochondrial	WBGene00009992	0.323	0.017	0.511	0.306	-0.188	-0.494	up		up	up	down	down
Q21324	dnj-15	J domain-containing protein	WBGene00001033	-0.253	0.321	-0.12	-0.575	-0.133	0.442				down		up
O18240	rps-18	40S ribosomal protein S18	WBGene00004487	0.145	-0.071	-0.034	0.216	0.179	-0.037	up			up	up
P91001	csn-5	COP9 signalosome complex subunit 5	WBGene00000817	-0.278	0.288	0.121	-0.566	-0.399	0.168				down	down
G5EEU1	nbet-1	BET1	WBGene00043064	-0.476	-0.121	0.036	-0.355	-0.512	-0.157	down			down	down
G5EBH7	calu-1	CALUmenin (Calcium-binding protein) homolog	WBGene00019760	0.279	0.015	0.193	0.264	0.086	-0.178	up		up	up		down
Q9N4E8	CELE_Y71H2B.2	Phosphorylated adapter RNA export protein	WBGene00022192	0.447	-0.018	0.11	0.465	0.337	-0.128	up			up	up
O01460	C03G6.17	DUF1248 domain-containing protein	WBGene00015402	-0.36	0.157	0.044	-0.516	-0.404	0.113	down			down	down
O02639	rpl-19	60S ribosomal protein L19	WBGene00004431	0.143	-0.07	-0.001	0.214	0.144	-0.069	up			up	up
O17829	CELE_F21A3.3	Uncharacterized protein	WBGene00008993	0.28	-0.231	0.137	0.511	0.142	-0.368	up			up		down
P91240	srpa-72	Signal recognition particle subunit SRP72	WBGene00017245	-0.134	0.128	0.044	-0.262	-0.178	0.083				down	down
O02058	ptps-1	Putative 6-pyruvoyl tetrahydrobiopterin synthase	WBGene00015010	-0.534	0.066	-0.091	-0.601	-0.443	0.157	down			down	down
A7LPJ5	CELE_F10A3.17	FTH domain-containing protein	WBGene00045507	-0.28	0.091	0.111	-0.37	-0.391	-0.02	down			down	down
G5EGA6	dhrs-4	Dehydrogenase/reductase SDR family member 4	WBGene00010063	-0.218	0.165	0.166	-0.384	-0.384	0	down			down	down
Q23378	ttr-48	TransThyretin-Related family domain	WBGene00022515	-0.288	0.145	0.15	-0.433	-0.438	-0.005	down			down	down
Q20840	drd-5	Dietary restriction down regulated	WBGene00018885	-0.595	0.267	0.33	-0.861	-0.924	-0.063	down			down	down
Q11189	mrps-17	28S ribosomal protein S17, mitochondrial	WBGene00015487	0.44	0.084	1.201	0.356	-0.76	-1.116	up		up	up	down	down
Q18688	daf-21	Heat shock protein 90	WBGene00000915	0.336	0.114	0.043	0.222	0.293	0.071	up			up	up
A0A486WXX8	dab-1	PID domain-containing protein	WBGene00000894	-0.303	0.115	-0.04	-0.418	-0.263	0.155	down			down	down
H2KY99	CELE_Y25C1A.7	Yip1 domain-containing protein	WBGene00021294	0.21	-0.199	-0.051	0.409	0.261	-0.147				up	up
Q23683	CELE_ZK970.7	DUF148 domain-containing protein	WBGene00014173	1.555	0.285	0.069	1.27	1.485	0.215	up			up	up
Q22342	epg-7	ATG11 domain-containing protein	WBGene00020334	-0.335	0.195	0.131	-0.53	-0.466	0.064	down			down	down
G5EBK8	ras-1	GTP binding protein	WBGene00004310	-0.451	0.156	0.185	-0.607	-0.636	-0.029	down			down	down
O17616	C29F3.7	CUB_2 domain-containing protein	WBGene00007807	0.059	0.565	0.267	-0.506	-0.208	0.298		up		down
Q22252	fndc-1	FUN14 domain-containing protein fndc-1	WBGene00011528	-0.479	0.225	-0.076	-0.704	-0.403	0.301	down			down	down
Q9XVA6	cyp-37a1	CYtochrome P450 family	WBGene00008499	-0.418	0.004	0.406	-0.423	-0.825	-0.402	down		up	down	down	down
Q21830	CELE_R07E5.4	Uncharacterized protein	WBGene00011112	1.06	-0.223	-0.229	1.283	1.289	0.006	up			up	up
Q95Q68	C37H5.13	Uncharacterized protein	WBGene00016511	-0.682	-0.326	-0.592	-0.356	-0.09	0.266	down	down	down	down		up
Q18797	C53B4.3	MFS domain-containing protein	WBGene00008273	-0.459	0.362	-0.02	-0.822	-0.44	0.382	down			down	down
Q95QG7	exos-8	Ribosomal RNA-processing protein 43	WBGene00018305	0.975	-0.091	-0.067	1.066	1.042	-0.024	up			up	up
P90860	CELE_F36A2.7	Uncharacterized protein	WBGene00009454	0.408	0.061	0.427	0.347	-0.019	-0.366	up		up	up		down
Q966C6	rpl-7A	60S ribosomal protein L7a	WBGene00004419	0.194	0.002	-0.006	0.193	0.201	0.008	up			up	up
P53703	cchl-1	Probable holocytochrome-c-type synthase	WBGene00011527	0.263	-0.069	-0.395	0.332	0.658	0.327	up		down	up	up	up
B1GRK5	CELE_F41E6.5	FMN hydroxy acid dehydrogenase domain-containing protein	WBGene00018286	-0.39	0.011	0.025	-0.401	-0.415	-0.014	down			down	down
K7ZUH9;P08898;Q10453;Q9U281	his-40	Histone H3;Histone H3;Histone H3.3 type 1;Histone H3.3 type 2	WBGene00001914	-0.268	0.562	0.184	-0.83	-0.452	0.378		up		down	down
A0A486WUL5	CELE_M142.5	AD domain-containing protein	WBGene00010922	-0.28	0.042	0.044	-0.321	-0.324	-0.002	down			down	down
Q9BL33	CELE_Y71H2AM.4	Uncharacterized protein	WBGene00022169	0.388	-0.011	0.728	0.399	-0.34	-0.739	up		up	up	down	down
Q9NA83	rol-1	Col_cuticle_N domain-containing protein	WBGene00004394	-0.035	1.205	0.178	-1.24	-0.213	1.027		up		down		up
O16948	pqn-60	DUF148 domain-containing protein	WBGene00004144	1.657	0.721	-0.115	0.936	1.772	0.837	up	up		up	up	up
Q17490	unc-44	Uncharacterized protein	WBGene00006780	-0.116	0.102	0.081	-0.218	-0.197	0.021	down			down	down
Q8MPR9	obr-3	PH domain-containing protein	WBGene00014215	-0.534	-0.187	-0.113	-0.347	-0.421	-0.074	down			down	down
O18183	CELE_W09D10.4	Protein phosphatase	WBGene00012362	-0.359	-0.053	-0.289	-0.306	-0.07	0.237	down		down	down		up
Q20012	dhs-20	DeHydrogenases, Short chain	WBGene00000983	-0.698	-0.084	0.645	-0.614	-1.342	-0.728	down		up	down	down	down
Q27497	gsp-1	Serine/threonine-protein phosphatase PP1-alpha	WBGene00001747	-0.154	0.117	0.048	-0.271	-0.202	0.069	down			down	down
B2MZC4	CELE_T23G11.11	Uncharacterized protein	WBGene00077728	-0.559	0.509	0.102	-1.068	-0.661	0.407	down			down	down
Q9N4D8	nlp-40	Neuropeptide-like peptides nlp-40	WBGene00022276	-0.439	0.001	0.118	-0.44	-0.558	-0.118	down			down	down
P46822	klc-2	Kinesin light chain	WBGene00002215	-0.165	0.011	-0.037	-0.176	-0.128	0.048	down			down	down
P55853	smo-1	Small ubiquitin-related modifier	WBGene00004888	0.448	0.067	0.088	0.381	0.36	-0.021	up			up	up
P49713	W03G11.3	Putative alpha-L-fucosidase	WBGene00012225	-0.333	0.303	-0.084	-0.636	-0.248	0.388	down			down		up
Q18805	C53B7.2	TIL domain-containing protein	WBGene00016893	-0.086	-1.414	-0.676	1.328	0.59	-0.738		down		up
A5Z2W6	CELE_ZK228.4	N-acetyltransferase domain-containing protein	WBGene00013947	-0.573	0.005	-1.043	-0.578	0.47	1.048	down		down	down	up	up
Q17426	B0024.11	Putative pseudouridine synthase B0024.11	WBGene00007101	0.639	0.203	0.106	0.436	0.533	0.097	up			up	up
Q9N5N9	CELE_H06I04.3	Putative rRNA methyltransferase	WBGene00019168	0.983	0.202	0.275	0.781	0.709	-0.072	up			up	up
Q9N3T2	crn-1	Flap endonuclease 1	WBGene00000794	1.116	0.073	0.528	1.042	0.588	-0.454	up			up	up
Q9TYL9	copb-1	Coatomer subunit beta	WBGene00021292	-0.156	0.099	0.042	-0.255	-0.198	0.057	down			down	down
Q9TXI4	CELE_F23C8.5	Electron transfer flavoprotein subunit beta	WBGene00017734	-0.201	0.05	-0.279	-0.252	0.078	0.329	down		down	down		up
Q09533	rpl-10	60S ribosomal protein L10	WBGene00004421	0.222	-0.023	0.04	0.245	0.182	-0.063	up			up	up
Q18066	dim-1	Disorganized muscle protein 1	WBGene00001000	0.023	0.467	0.237	-0.444	-0.215	0.23		up		down
Q20224	lbp-2	Fatty acid-binding protein homolog 2	WBGene00002254	-0.085	0.252	-0.038	-0.337	-0.048	0.289		up		down		up
O01868	rpl-24.1	60S ribosomal protein L24	WBGene00004436	-0.403	0.561	-0.089	-0.964	-0.314	0.65				down		up
P54815	mspn-1	Mitochondrial sorting homolog	WBGene00010557	-0.361	0.26	-0.051	-0.622	-0.31	0.312	down			down
O02163	CELE_T09B4.2	Uncharacterized protein	WBGene00020376	-0.381	0.104	0.025	-0.485	-0.406	0.078	down			down	down
Q93235	nkb-1	Sodium/potassium-transporting ATPase subunit beta-1	WBGene00007646	-0.151	0.07	0.029	-0.221	-0.18	0.04	down			down	down
Q9XXH0	comt-2	Catechol-O-MethylTransferase family	WBGene00012518	-0.509	0.202	0.084	-0.711	-0.593	0.118	down			down	down
Q18994	eif-2bepsilon	eIF-2B GDP-GTP exchange factor subunit epsilon	WBGene00008428	-0.256	0.097	0.03	-0.353	-0.286	0.067	down			down	down
O76618	cars-1	Cysteine--tRNA ligase	WBGene00000800	-0.223	0.02	-0.034	-0.244	-0.189	0.055	down			down	down
Q21890	R102.4	Uncharacterized protein R102.4	WBGene00011291	-0.252	0.083	0.081	-0.334	-0.333	0.001	down			down	down
P34398	F10E9.4	Uncharacterized protein F10E9.4	WBGene00017356	1.114	0.463	0.299	0.651	0.815	0.164	up	up		up	up
Q05036	hsp-110	Heat shock protein 110	WBGene00016250	0.162	0.018	0.012	0.144	0.15	0.006	up			up	up
P54871	hmgs-1	Hydroxymethylglutaryl-CoA synthase	WBGene00017769	0.317	-0.081	-0.364	0.398	0.68	0.283	up		down	up	up	up
Q965I8	CELE_T25D3.3	PALP domain-containing protein	WBGene00020797	-1.241	-0.547	-0.497	-0.694	-0.744	-0.05	down	down	down	down	down
P91844	msa-1	Microfilaria Surface-Associated protein	WBGene00013882	-0.604	-0.194	0.02	-0.411	-0.625	-0.214	down			down	down
H2KYP1	lntl-1	LIN-24 (Twenty-four) Like	WBGene00016289	-0.313	0.112	0.043	-0.425	-0.356	0.069	down			down	down
P91427	pgk-1	Probable phosphoglycerate kinase	WBGene00020185	-0.112	0.105	-0.05	-0.217	-0.062	0.155				down		up
P91829	nhr-69	Nuclear hormone receptor family member nhr-69	WBGene00003659	-0.243	0.277	0.256	-0.52	-0.499	0.021				down	down
O01658	jmjc-1	Bifunctional lysine-specific demethylase and histidyl-hydroxylase NO66	WBGene00020902	0.561	0.206	0.167	0.355	0.394	0.039	up			up	up
P34304	C06E1.9	Uncharacterized protein C06E1.9	WBGene00015524	-0.234	0.171	0.013	-0.405	-0.247	0.158	down			down	down
O17389	tth-1	Thymosin beta	WBGene00006649	-0.274	0.172	-0.025	-0.446	-0.25	0.196	down			down	down
O01603	cpg-22	Chondroitin ProteoGlycan	WBGene00020413	1.262	-0.034	-0.002	1.296	1.264	-0.032	up			up	up
G5EDP0	CELE_Y32F6A.5	Uncharacterized protein	WBGene00012530	-1.15	-0.715	-0.558	-0.435	-0.592	-0.157	down	down	down	down	down
O44730	zig-7	Zwei Ig domain protein zig-7	WBGene00006984	-0.592	-0.036	-0.012	-0.556	-0.58	-0.024	down			down	down
O02642	sucl-2	Succinate--CoA ligase [ADP/GDP-forming] subunit alpha, mitochondrial	WBGene00017759	0.062	-0.15	-0.168	0.212	0.23	0.017		down	down	up	up
Q09287	C56G2.3	Uncharacterized protein C56G2.3	WBGene00016978	0.565	0.009	0.074	0.556	0.492	-0.065	up			up	up
Q22467	ctg-2	CRAL/TRIO and GOLD domain containing	WBGene00011756	-0.213	0.116	0.106	-0.329	-0.318	0.01	down			down	down
G5EGA7	ras-2	GTP binding protein	WBGene00004311	-0.072	0.29	0.076	-0.362	-0.148	0.214		up		down
D0VWL6	fln-2	FiLamiN (Actin binding protein) homolog	WBGene00016006	-0.121	0.154	0.092	-0.275	-0.212	0.062				down	down
Q7JP75	cyk-1	CYtoKinesis defect	WBGene00000872	-0.32	0.162	0.404	-0.482	-0.723	-0.242	down		up	down	down
Q9XUT9	CELE_K06G5.1	VWFA domain-containing protein	WBGene00010605	-0.322	0.112	-0.351	-0.434	0.03	0.463	down		down	down		up
G5EDY2	wars-1	Tryptophan--tRNA ligase	WBGene00006945	0.531	0.139	0.02	0.392	0.511	0.119	up			up	up
O45583	gmd-2	GDP-mannose 4,6 dehydratase 2	WBGene00010166	-0.398	-0.025	-0.197	-0.373	-0.201	0.172	down			down	down
Q95X21	CELE_Y71H10B.1	Uncharacterized protein	WBGene00022201	-0.298	-0.068	0.018	-0.23	-0.316	-0.086	down			down	down
Q9N3J4	CELE_Y51H7C.7	Uncharacterized protein	WBGene00021785	1.04	0.21	-0.006	0.829	1.046	0.217	up			up	up
O17583	lin-10	Protein lin-10	WBGene00002999	-0.29	0.07	0.031	-0.361	-0.321	0.04	down			down	down
Q09218	B0495.9	Uncharacterized protein B0495.9	WBGene00015208	-0.408	0.166	-0.143	-0.574	-0.265	0.309	down			down
O44897	haf-9	ABC transmembrane type-1 domain-containing protein	WBGene00001819	-0.073	0.208	0.175	-0.281	-0.249	0.032		up		down	down
O45148	dlst-1	Dihydrolipoyllysine-residue succinyltransferase component of 2-oxoglutarate dehydrogenase complex, mitochondrial	WBGene00020950	-0.238	0.12	-0.12	-0.358	-0.118	0.24	down			down		up
Q9XXR4	ttr-24	TransThyretin-Related family domain	WBGene00013077	0.1	0.489	0.153	-0.389	-0.053	0.336		up		down		up
Q10944	pho-5	Putative acid phosphatase 5	WBGene00015161	0.3	-0.368	-0.061	0.667	0.36	-0.307				up	up
G5ED94	3A339	3A339	WBGene00016217	-0.461	0.219	0.431	-0.68	-0.892	-0.212	down		up	down	down
Q22898	C16D9.4	Uncharacterized protein	WBGene00015859	-0.23	0.267	-0.03	-0.497	-0.2	0.298				down
P34574	chc-1	Probable clathrin heavy chain 1	WBGene00011867	-0.193	-0.067	-0.029	-0.126	-0.164	-0.038	down			down	down
G4SQY7	slc-36.2	Aa_trans domain-containing protein	WBGene00020837	-0.156	0.47	0.386	-0.626	-0.542	0.084		up		down	down
O02056	rpl-4	60S ribosomal protein L4	WBGene00004415	0.165	-0.031	0.016	0.196	0.149	-0.046	up			up	up
B4E3X6	spds-1	PABS domain-containing protein	WBGene00012909	-0.227	0.206	-0.034	-0.434	-0.194	0.24				down
Q18846	rskn-2	Putative ribosomal protein S6 kinase alpha-2	WBGene00008311	-0.114	0.09	0.202	-0.204	-0.316	-0.112	down		up	down	down
P90861	phip-1	Protein HIstidine Phosphatase	WBGene00009455	-0.318	0.06	0.02	-0.378	-0.338	0.04	down			down	down
Q93759	swan-2	WD_REPEATS_REGION domain-containing protein	WBGene00009976	-0.31	0.225	0.135	-0.535	-0.445	0.09	down			down	down
P91857	rab-5	RAB family	WBGene00004268	-0.208	-0.001	0.005	-0.207	-0.213	-0.006	down			down	down
Q9XTB5	lem-2	LEM protein 2	WBGene00002275	-0.153	0.394	0.21	-0.547	-0.363	0.184		up		down	down
Q9UAZ2	CELE_Y49G5A.1	BPTI/Kunitz inhibitor domain-containing protein	WBGene00021731	-0.707	1.325	0.851	-2.032	-1.558	0.474				down	down
Q86S66	icd-2	Nascent polypeptide-associated complex subunit alpha	WBGene00022042	0.428	0.146	0.047	0.282	0.381	0.099	up			up	up
Q93573	tct-1	Translationally-controlled tumor protein homolog	WBGene00009122	0.289	0.073	0.157	0.217	0.133	-0.084	up		up	up	up
O01884	coq-6	Ubiquinone biosynthesis monooxygenase COQ6, mitochondrial	WBGene00000766	-0.301	-0.061	-0.139	-0.239	-0.161	0.078	down			down	down
P49196	rps-12	40S ribosomal protein S12	WBGene00004481	-0.578	0.594	-0.222	-1.172	-0.356	0.815				down		up
Q5ZR27	lec-12	Galectin	WBGene00017080	-0.3	-0.012	-0.07	-0.288	-0.23	0.058	down			down	down
P46561	atp-2	ATP synthase subunit beta, mitochondrial	WBGene00000229	-0.176	0.101	-0.07	-0.277	-0.105	0.172	down			down
Q9TYY4	ugt-20	Glucuronosyltransferase	WBGene00019516	-0.632	-0.108	-0.671	-0.524	0.039	0.563	down		down	down		up
Q09456	col-80	Putative cuticle collagen 80	WBGene00000656	0.464	-0.137	0.043	0.601	0.422	-0.179	up			up	up
Q4TTB1	CELE_ZK563.7	Uncharacterized protein	WBGene00044355	-0.552	0.141	-0.014	-0.693	-0.538	0.155	down			down	down
Q9N306	CELE_Y61A9LA.10	Bms1-type G domain-containing protein	WBGene00022021	1.014	0.3	0.214	0.713	0.799	0.086	up			up	up
Q94261	cif-1	COP9/Signalosome and eIF3 complex-shared subunit 1	WBGene00019543	0.267	0.029	-0.023	0.238	0.289	0.052	up			up	up
H2L0D0	hrpa-2	Heterogeneous nuclear RibonucleoProtein (HnRNP) A homolog	WBGene00019249	-0.508	0.155	-0.197	-0.663	-0.311	0.352	down			down
G5EDH8	nhx-1	Sodium/hydrogen exchanger	WBGene00003729	1.179	0.103	0.272	1.076	0.907	-0.169	up			up	up
Q8WQB3	apg-1	AP-1 complex subunit gamma	WBGene00000158	-0.181	0.124	0.034	-0.306	-0.215	0.09	down			down	down
Q93716	cfim-1	Cleavage and polyadenylation specificity factor subunit 5	WBGene00009668	-0.188	0.344	0.03	-0.531	-0.217	0.314				down
Q400L6	CELE_H06H21.11	Uncharacterized protein	WBGene00044483	1.192	0.361	0.195	0.831	0.997	0.166	up			up	up
O45819	gyg-2	GlYcoGenin like	WBGene00012020	-0.68	0.039	-0.284	-0.719	-0.395	0.324	down			down	down
Q20310	CELE_F42A10.5	Uncharacterized protein	WBGene00018341	0.302	0.047	0.026	0.255	0.275	0.021	up			up	up
G5EGC7	hrg-2	Cadmium-inducible lysosomal protein CDR-5	WBGene00010473	-1.926	-0.867	-1.64	-1.058	-0.285	0.773	down	down	down	down		up
V6CLP5	ketn-1	Kettin homolog	WBGene00004130	-0.039	0.106	0.044	-0.145	-0.083	0.062		up		down	down
Q7YTL5	mter-4	Mitochondrial Transcription tERmination factor homolog	WBGene00010771	0.608	0.065	-0.22	0.543	0.828	0.285	up			up	up
Q95XN1	CELE_Y71G12B.10	Hydroxymethylglutaryl-CoA lyase	WBGene00022150	-0.158	0.048	-0.27	-0.206	0.112	0.318	down		down	down	up	up
Q19531	CELE_F17H10.2	Uncharacterized protein	WBGene00008926	-1.066	-0.448	-0.378	-0.617	-0.688	-0.07	down	down		down	down
Q18006	C15B12.1	Putative sarcosine oxidase	WBGene00015783	-0.452	0.035	0.123	-0.487	-0.575	-0.088	down			down	down
Q17850	pak-1	Serine/threonine-protein kinase pak-1	WBGene00003911	-0.276	0.178	0.149	-0.454	-0.426	0.028	down			down	down
A3FPI3	C29E4.15	Uncharacterized protein	WBGene00045246	-0.153	0.532	0.133	-0.685	-0.286	0.399		up		down
O16720	alg-2	Protein argonaute	WBGene00000106	-0.488	0.09	-0.054	-0.577	-0.433	0.144	down			down	down
Q9XX97	nkat-1	Aminotran_1_2 domain-containing protein	WBGene00009232	0.169	-0.321	0.137	0.49	0.032	-0.458				up		down
Q19266	pkc-3	Protein kinase C-like 3	WBGene00004034	-0.157	0.161	0.021	-0.318	-0.179	0.14				down	down
Q22020	CELE_R53.5	Peroxiredoxin-like 2A	WBGene00011274	-0.41	-0.132	-0.29	-0.278	-0.12	0.158	down		down	down
Q9U1X4	Y62E10A.11	Putative guanine nucleotide exchange factor MSS4 homolog		-0.446	0.423	0.197	-0.87	-0.644	0.226				down	down
Q9N4H6	gst-43	Maleylacetoacetate isomerase	WBGene00001791	-0.202	0.294	-0.03	-0.496	-0.172	0.324				down		up
Q21732	CELE_R04F11.2	ATP synthase subunit e, mitochondrial	WBGene00011015	-0.166	0.175	0.251	-0.341	-0.417	-0.076			up	down	down
P52715	ctsa-1.2	Serine carboxypeptidase ctsa-1.2	WBGene00008741	-0.778	-0.224	-0.463	-0.554	-0.315	0.239	down		down	down	down
P34693	snt-1	Synaptotagmin-1	WBGene00004921	-0.274	0.201	0.137	-0.474	-0.411	0.064	down			down	down
Q9XVE5	fce-1	CAAX prenyl protease 1 homolog	WBGene00001405	-0.207	0.219	0.067	-0.426	-0.274	0.152				down	down
G5EEE1	fut-6	Alpha-(1,3)-fucosyltransferase fut-6	WBGene00020222	-0.362	0.108	0.22	-0.469	-0.581	-0.112	down			down	down
G5EE32	CELE_T04F3.1	Aminotran_1_2 domain-containing protein	WBGene00011436	-0.347	-0.004	0.033	-0.343	-0.381	-0.037	down			down	down
Q9XWC2	Y73F4A.1	DOMON domain-containing protein Y73F4A.1	WBGene00013514	-0.306	0.221	-0.09	-0.526	-0.215	0.311	down			down
Q17348	snr-1	Small nuclear ribonucleoprotein Sm D3	WBGene00004914	0.253	-0.046	0.092	0.299	0.161	-0.138	up			up	up
O44572	tni-4	Troponin I 4	WBGene00006586	-0.095	0.292	0.406	-0.387	-0.501	-0.115		up	up	down	down
G5EE72	mrp-5	Multidrug resistance-associated protein 5	WBGene00003411	-0.511	-0.174	-0.281	-0.337	-0.23	0.107	down		down	down	down
Q19185	sgn-1	SarcoGlycaN	WBGene00004790	-0.399	0.19	0.188	-0.589	-0.587	0.002	down			down	down
Q20950	cpr-9	Pept_C1 domain-containing protein	WBGene00010204	-1.157	-0.65	-0.566	-0.507	-0.591	-0.084	down	down	down	down	down
Q22067	got-1.2	Aspartate aminotransferase, cytoplasmic	WBGene00020146	-0.076	0.083	-0.001	-0.158	-0.075	0.083				down
A0A1X7RC97	argn-1	ARGiNase Homolog	WBGene00020658	-0.462	-0.185	-0.373	-0.276	-0.089	0.187	down		down	down		up
P25807	cpr-1	Gut-specific cysteine proteinase	WBGene00000781	0.915	-0.031	1.6	0.946	-0.685	-1.63	up		up	up	down	down
G5EFH7	agef-1	SEC7 domain-containing protein	WBGene00012386	-0.518	-0.024	-0.044	-0.494	-0.474	0.02	down			down	down
P90830	CELE_F10C2.5	alpha-1,2-Mannosidase	WBGene00008646	-0.353	0.195	-0.071	-0.548	-0.282	0.266	down			down
Q93459	nubp-1	Cytosolic Fe-S cluster assembly factor NUBP1 homolog	WBGene00008664	0.262	-0.115	0.06	0.377	0.202	-0.175	up			up	up
Q20007	CELE_F35A5.1	Uncharacterized protein	WBGene00018024	-0.253	0.339	0.058	-0.592	-0.311	0.281				down
G5EGL5	pha-1	Pha-1 protein	WBGene00004010	0.721	0.055	0.184	0.666	0.537	-0.129	up			up	up
Q9XXK6	qns-1	Glutamine-dependent NAD(+) synthetase	WBGene00007698	-0.393	0.061	-0.037	-0.454	-0.357	0.098	down			down	down
Q95PX0	nck-1	NCK (Non-Catalytic region of tyrosine Kinase) adaptor protein family	WBGene00006410	-0.238	0.098	0.088	-0.336	-0.326	0.01	down			down	down
Q95YD2	C45B2.6	Phospholipase A(2)	WBGene00016661	-0.396	0.119	-0.091	-0.516	-0.305	0.211	down			down	down
H2L049	CELE_F46H5.7	Uncharacterized protein	WBGene00018522	-0.278	-0.114	-0.006	-0.164	-0.271	-0.107	down	down		down	down	down
Q20121	acs-4	Fatty Acid CoA Synthetase family	WBGene00018152	-0.337	-0.069	-0.077	-0.268	-0.26	0.008	down			down	down
O62512	CELE_ZK550.3	Peptidase_M3 domain-containing protein	WBGene00013997	0.229	-0.039	-0.142	0.268	0.371	0.103	up			up	up
O45577	cpf-2	RRM domain-containing protein	WBGene00000774	-0.39	0.255	-0.01	-0.645	-0.381	0.265	down			down	down
Q9TXK1	CELE_F54E2.1	Uncharacterized protein	WBGene00018823	-0.308	0.091	-0.17	-0.399	-0.138	0.261	down			down		up
Q18406	sec-10	Exocyst complex component 5	WBGene00016376	-0.299	0.098	0.019	-0.397	-0.319	0.079	down			down	down
Q20678	sec-3	Exocyst complex component 1	WBGene00018703	-0.417	0.046	-0.061	-0.463	-0.356	0.108	down			down	down
O62149	scrm-4	Phospholipid scramblase	WBGene00008681	0.795	-0.093	-0.288	0.889	1.083	0.194	up			up	up
O16215	CELE_F17A9.5	Oxidored_FMN domain-containing protein	WBGene00017537	-0.107	0.185	0.058	-0.291	-0.165	0.127				down	down
Q9XVF7	rpl-2	60S ribosomal protein L8	WBGene00004413	0.204	-0.038	-0.03	0.242	0.233	-0.008	up			up	up
K8FE02	imph-1	IMP Homolog	WBGene00010908	-0.11	0.262	0.131	-0.372	-0.241	0.131		up		down	down
P91341	F55F8.3	Periodic tryptophan protein 2 homolog	WBGene00018891	0.706	0.127	0.07	0.579	0.636	0.057	up			up	up
O01532	asp-5	Peptidase A1 domain-containing protein	WBGene00000218	-0.198	0.123	-0.236	-0.32	0.038	0.358	down		down	down		up
Q21230	eif-2beta	Eukaryotic translation initiation factor 2 subunit 2	WBGene00010560	0.276	-0.043	-0.112	0.319	0.388	0.069	up			up	up
Q09457	bli-1	Cuticle collagen bli-1	WBGene00000251	0.17	0.747	0.357	-0.577	-0.187	0.39		up		down		up
P34426	F44B9.5	Lipid droplet-regulating VLDL assembly factor AUP1 homolog	WBGene00018408	-0.208	0.311	0.084	-0.519	-0.292	0.227				down	down
O44408	kgb-1	GLH-binding kinase 1	WBGene00002187	-0.185	0.076	0.016	-0.261	-0.201	0.06	down			down	down
P52132;P77206	yfjQ	UPF0380 protein YfjQ;UPF0380 protein YafZ		0.248	-0.721	-0.418	0.969	0.666	-0.303		down		up	up
Q09305	F10B5.2	Protein AAR2 homolog	WBGene00008639	0.45	-0.31	-0.211	0.76	0.661	-0.099	up			up	up
Q9N5B3	CELE_W08E12.7	Peptidase_M24 domain-containing protein	WBGene00021088	0.253	0.032	0.024	0.221	0.229	0.008	up			up	up
Q19390	acp-5	ACid Phosphatase family	WBGene00017427	-0.347	0.068	0.305	-0.415	-0.652	-0.237	down		up	down	down
Q9XWN7	CELE_Y43F8C.13	IU_nuc_hydro domain-containing protein	WBGene00012834	-0.285	-0.039	0.162	-0.246	-0.447	-0.201	down		up	down	down	down
Q17334	sodh-1	Alcohol dehydrogenase 1	WBGene00010790	1.127	0.211	-0.283	0.916	1.41	0.494	up			up	up
Q23445	sar-1	GTP-binding protein SAR1	WBGene00022678	-0.253	0.004	-0.067	-0.257	-0.186	0.071	down			down	down
A0A078BQL1	CELE_Y41E3.7	Uncharacterized protein	WBGene00012765	-0.181	0.3	0.02	-0.482	-0.201	0.28				down
Q95XX2	clec-85	C-type lectin domain-containing protein	WBGene00021872	-1.485	-0.458	-0.842	-1.027	-0.643	0.384	down		down	down	down
O18089	CELE_T13F3.6	DUF19 domain-containing protein	WBGene00011753	0.748	0.1	0.181	0.648	0.567	-0.081	up			up	up
O01470	C04E6.11	Uncharacterized protein	WBGene00015425	0.587	-0.14	-0.367	0.727	0.954	0.227	up			up	up
Q22588	lgc-32	Neur_chan_LBD domain-containing protein	WBGene00020569	0.163	-0.407	-0.069	0.569	0.232	-0.337		down		up
H2KZL0	CELE_W04B5.3	Galectin domain-containing protein	WBGene00021020	-0.35	0.122	-0.01	-0.473	-0.34	0.132	down			down	down
O17982	arrd-13	Arrestin_C domain-containing protein	WBGene00011054	0.287	-0.195	0.095	0.482	0.192	-0.29	up			up
H2KYS8	cpna-1	Copine family protein 1	WBGene00006495	-0.119	0.126	0.089	-0.245	-0.208	0.037				down	down
P43510	cpr-6	Cathepsin B-like cysteine proteinase 6	WBGene00000786	-0.681	-0.175	0.42	-0.506	-1.101	-0.595	down		up	down	down	down
Q21956	CELE_R12C12.9	Uncharacterized protein	WBGene00020029	-0.574	0.105	0.115	-0.679	-0.689	-0.01	down			down	down
Q966L1	poml-2	PON (Paraoxonase) and MEC-6 Like	WBGene00017089	-0.21	0.399	0.31	-0.61	-0.52	0.09				down	down
Q93169	C01G10.9	Methylthioribose-1-phosphate isomerase	WBGene00007236	-0.361	-0.063	-0.158	-0.297	-0.203	0.094	down			down	down
Q20352	alh-11	Aldedh domain-containing protein	WBGene00000117	-0.459	-0.155	-0.283	-0.304	-0.177	0.127	down		down	down	down
G5EEG6	CELE_T09F3.2	Carrier protein (C2)	WBGene00011662	-0.472	0.162	-0.001	-0.633	-0.471	0.163	down			down	down
Q9XWA4	CELE_Y40H7A.10	Uncharacterized protein	WBGene00012747	-0.514	0.017	0.252	-0.531	-0.766	-0.235	down			down	down
Q21734	rskn-1	Putative ribosomal protein S6 kinase alpha-1	WBGene00011352	-0.858	0.657	-0.239	-1.515	-0.619	0.895	down			down
Q966L4	dph-6	Diphthine--ammonia ligase	WBGene00017087	0.824	0.25	0.026	0.574	0.797	0.223	up			up	up
Q23490	mlt-7	Peroxidase mlt-7	WBGene00022743	-0.24	0.096	0.023	-0.337	-0.264	0.073	down			down	down
Q965K2	ddx-46	RNA helicase	WBGene00018776	-0.154	0.377	0.215	-0.531	-0.37	0.162		up		down	down
O45445	clec-66	C-type LECtin	WBGene00009397	-0.5	0.231	-0.556	-0.732	0.055	0.787	down		down	down		up
Q19056	CELE_E04F6.4	Uncharacterized protein	WBGene00017124	-0.358	0.021	0.201	-0.379	-0.559	-0.18	down			down	down
O01969	tag-96	GHMP_kinases_C domain-containing protein	WBGene00006461	0.101	-0.142	-0.02	0.243	0.121	-0.122				up
P10984	act-2	Actin-2	WBGene00000064	0.331	-0.252	0.064	0.583	0.267	-0.316	up			up
P90841	smgl-1	Uncharacterized protein	WBGene00008990	-0.335	0.005	0.019	-0.34	-0.354	-0.013	down			down	down
Q966F6	CELE_T13G4.4	Hcy-binding domain-containing protein	WBGene00020491	-0.334	0.064	-0.044	-0.398	-0.29	0.108	down			down	down
B3CJ41	irld-27	Insulin/EGF-Receptor L Domain protein	WBGene00077751	0.603	0.108	0.049	0.495	0.554	0.059	up			up	up
Q9NA25	ndx-8	Peroxisomal coenzyme A diphosphatase ndx-8	WBGene00003585	-0.89	0.08	0.001	-0.97	-0.891	0.078	down			down	down
P43509	cpr-5	Cathepsin B-like cysteine proteinase 5	WBGene00000785	-0.697	-1.222	-1.236	0.524	0.539	0.014	down	down	down	up	up
Q8WT51	F35H12.5	Uncharacterized protein F35H12.5	WBGene00018077	-0.436	0.175	-0.248	-0.611	-0.188	0.423	down			down		up
Q9N4B1	clp-7	Calpain catalytic domain-containing protein	WBGene00000547	-0.238	0.057	0.036	-0.295	-0.273	0.021	down			down	down
Q03567	C38C10.2	Uncharacterized transporter slc-17.2	WBGene00008000	-0.505	-0.18	-0.182	-0.325	-0.323	0.002	down			down	down
Q18683	C47E12.2	ADP/ATP translocase	WBGene00008147	-0.32	0.347	-0.155	-0.667	-0.165	0.502				down		up
Q95ZQ4	aak-2	5'-AMP-activated protein kinase catalytic subunit alpha-2	WBGene00020142	-0.16	0.06	0.134	-0.22	-0.294	-0.074	down			down	down
P48154	rps-1	40S ribosomal protein S3a	WBGene00004470	0.132	-0.049	-0.004	0.181	0.136	-0.045	up			up	up
Q17820	aos-1	SUMO-activating enzyme subunit aos-1	WBGene00000142	-0.152	0.23	0.088	-0.381	-0.239	0.142				down	down
P91130	C32E8.9	Uncharacterized protein	WBGene00016325	-0.495	-0.136	-0.373	-0.359	-0.122	0.237	down		down	down		up
Q9TZ90	mrpl-40	Mitochondrial Ribosomal Protein, Large	WBGene00018793	0.383	0.022	-0.309	0.36	0.692	0.332	up		down	up	up	up
Q20751	iff-2	Eukaryotic translation initiation factor 5A-2	WBGene00002065	0.241	0.051	-0.044	0.189	0.285	0.096	up			up	up
Q95PY9	CELE_Y67H2A.7	Peptidase_M3 domain-containing protein	WBGene00013464	-0.141	0.127	-0.196	-0.268	0.055	0.323			down	down		up
Q9N4M0	pdp-1	PPM-type phosphatase domain-containing protein	WBGene00022832	-0.306	0.31	-0.025	-0.616	-0.281	0.335				down
Q27473	nex-3	Annexin	WBGene00003590	0.213	-0.064	-0.303	0.278	0.516	0.239	up		down	up	up	up
Q2AAC0	CELE_Y71H2AM.3	E3 ubiquitin-protein ligase E3D	WBGene00022168	0.763	-0.462	0.36	1.224	0.403	-0.821	up			up		down
Q9N4M4	anc-1	Nuclear anchorage protein 1	WBGene00000140	-0.197	-0.054	0.108	-0.143	-0.305	-0.162	down		up	down	down	down
Q17993	rml-3	L-RhaMnose biosynthetic pathway	WBGene00015781	0.437	0.89	0.61	-0.452	-0.172	0.28	up	up	up	down
O62126	tag-175	Transmembrane protein 41 homolog	WBGene00006520	-0.591	0.431	-0.093	-1.023	-0.499	0.524	down			down
O16619	dhs-13	DeHydrogenases, Short chain	WBGene00000976	-0.213	0.104	-0.238	-0.317	0.025	0.342	down		down	down		up
Q23590	baz-2	Bromodomain adjacent to zinc finger domain protein 2	WBGene00001470	0.752	0.05	0.317	0.702	0.435	-0.268	up			up	up
P34419	F42H10.6	Putative esterase F42H10.6	WBGene00018370	-0.687	0.213	-0.195	-0.9	-0.491	0.408	down			down
Q9XXT5	lpin-1	LNS2 domain-containing protein	WBGene00010425	-0.218	0.082	0.053	-0.299	-0.27	0.029	down			down	down
Q18120	twk-18	TWiK family of potassium channels protein 18	WBGene00006672	-0.236	0.109	0.109	-0.344	-0.344	0	down			down	down
Q95QY5	C03B1.14	Uncharacterized protein	WBGene00015382	-0.666	0.288	-0.115	-0.954	-0.551	0.402	down			down	down
A0A0K3AUJ9	prdx-2	Peroxiredoxin prdx-2	WBGene00006434	-0.219	0.082	-0.193	-0.301	-0.026	0.275	down			down		up
Q9N2X8	pqn-89	Prion-like-(Q/N-rich)-domain-bearing protein	WBGene00004169	-0.627	1.028	0.458	-1.655	-1.085	0.57				down	down
Q21109	endu-1	Endoribonuclease endu-1	WBGene00010488	-0.531	-0.103	-0.003	-0.428	-0.528	-0.099	down			down	down
O02266	alh-7	Aldedh domain-containing protein	WBGene00000113	-0.15	0.019	-0.167	-0.168	0.017	0.186	down		down	down		up
Q9GYT2	CELE_F35F10.13	DUF19 domain-containing protein	WBGene00018062	1.003	-0.074	0.054	1.076	0.948	-0.128	up			up	up
Q93795	hpo-31	Uncharacterized protein	WBGene00010089	0.405	0.084	-0.01	0.321	0.415	0.094	up			up	up
Q09349	ufd-2	Ubiquitin conjugation factor E4 ufd-2	WBGene00006734	-0.274	0.045	0.005	-0.319	-0.279	0.041	down			down	down
G5ED36	rme-8	Endocytosis protein RME-8	WBGene00004378	-0.316	-0.005	-0.065	-0.311	-0.25	0.061	down			down	down
Q22615	CELE_T20G5.9	Partner of Y14 and mago	WBGene00011871	-0.385	0.29	-0.042	-0.674	-0.343	0.331	down			down
Q23534	acp-1	Putative acid phosphatase 1	WBGene00022770	0.112	-0.231	-0.038	0.342	0.15	-0.192				up
Q22540	CELE_T18D3.1	Uncharacterized protein	WBGene00011820	-0.392	0.289	0.087	-0.682	-0.48	0.202	down			down	down
Q10009	T19C3.3	Uncharacterized protein T19C3.3	WBGene00020561	-0.07	0.33	0.152	-0.4	-0.223	0.177		up		down	down
Q9XUE0	dod-22	CUB_2 domain-containing protein	WBGene00010125	-0.461	0.186	-0.454	-0.648	-0.008	0.64	down		down	down		up
Q9BHK7	xrn-1	5'-3' exoribonuclease 1	WBGene00012730	-0.278	0.066	-0.015	-0.344	-0.262	0.081	down			down	down
O45434	tbc-3	Rab-GAP TBC domain-containing protein	WBGene00009322	-0.302	0.303	-0.057	-0.605	-0.245	0.36				down
P51485	arr-1	Beta-arrestin arr-1	WBGene00000195	-0.347	-0.069	0.073	-0.278	-0.42	-0.143	down			down	down
P24894	ctc-2	Cytochrome c oxidase subunit 2	WBGene00010965	-0.172	1.218	0.381	-1.389	-0.552	0.837		up		down
G5EF08	ncx-1	Na/Ca eXchangers	WBGene00003566	-0.126	0.202	0.153	-0.328	-0.279	0.049				down	down
P20163	hsp-4	Endoplasmic reticulum chaperone BiP homolog	WBGene00002008	-0.297	-0.01	-0.055	-0.286	-0.242	0.044	down			down	down
P34423	F44B9.2	Uncharacterized protein F44B9.2	WBGene00018407	-0.288	0.114	0.115	-0.402	-0.403	-0.001	down			down	down
Q8WTM6	arx-4	Probable actin-related protein 2/3 complex subunit 2	WBGene00021170	-0.236	0.006	-0.073	-0.243	-0.164	0.079	down			down	down
Q09665	tnc-2	Troponin C, isoform 2	WBGene00006583	-0.045	0.267	0.206	-0.312	-0.251	0.061		up		down	down
O61788	inx-17	Innexin-17	WBGene00002139	-0.303	0.068	0.003	-0.371	-0.306	0.065	down			down	down
Q9XUY2	aakb-1	AMPKBI domain-containing protein	WBGene00010115	-0.318	0.064	0.256	-0.382	-0.574	-0.192	down			down	down
O01498	stam-1	Signal transducing adapter molecule 1	WBGene00004109	-0.254	0.164	0.099	-0.417	-0.353	0.065	down			down	down
P90914	ate-1	Arginyl-tRNA--protein transferase 1	WBGene00010615	-0.385	0.115	0.055	-0.5	-0.44	0.06	down			down	down
Q23356	mig-15	Serine/threonine-protein kinase mig-15	WBGene00003247	-0.547	0.014	0.011	-0.56	-0.558	0.002	down			down	down
C0Z1Y6	CELE_F40G9.5	Uncharacterized protein	WBGene00018241	-0.647	-0.201	-0.038	-0.446	-0.609	-0.163	down			down	down
Q20728	tbcb-1	Tubulin-specific chaperone B	WBGene00009987	-0.287	0.147	0.049	-0.434	-0.337	0.097	down			down	down
A3FPJ3	CELE_F07G6.10	Uncharacterized protein	WBGene00045271	-0.894	-0.254	-0.268	-0.64	-0.627	0.013	down			down	down
Q19687	CELE_F21D5.3	Plastocyanin-like domain-containing protein	WBGene00009008	-0.138	0.366	0.196	-0.504	-0.334	0.17		up		down	down
Q9XUC0	CELE_T28F3.8	Uncharacterized protein	WBGene00012134	-0.516	0.274	-0.196	-0.79	-0.319	0.471	down			down
O17038	col-143	Col_cuticle_N domain-containing protein	WBGene00000716	0.639	-0.01	-0.226	0.649	0.865	0.216	up			up	up
Q9U239	Y56A3A.18	Zinc finger protein 593 homolog	WBGene00013236	1.185	0.377	0.362	0.808	0.823	0.015	up			up	up
Q9N369	atg-3	Autophagy_act_C domain-containing protein	WBGene00021922	-0.223	0.039	-0.007	-0.262	-0.216	0.046	down			down	down
Q8WTM3	comt-5	Catechol-O-MethylTransferase family	WBGene00021492	1.157	0.08	0.203	1.077	0.955	-0.123	up			up	up
H2L0P9	CELE_Y39A3CL.4	TLDc domain-containing protein	WBGene00021442	-0.25	-0.03	0.045	-0.22	-0.295	-0.075	down			down	down
Q22743	raga-1	RAs-related GTP-binding protein A	WBGene00006414	-0.27	0.007	-0.034	-0.277	-0.236	0.041	down			down	down
A0A5E4LWV7	lfi-1	Lin-5 (Five) Interacting protein	WBGene00022500	-0.208	0.001	0.146	-0.209	-0.354	-0.145	down		up	down	down	down
O17345	ttr-6	TransThyretin-Related family domain	WBGene00020886	-0.014	0.305	0.269	-0.319	-0.283	0.036		up	up	down	down
P90850	F26E4.3	Uncharacterized peptidase C1-like protein F26E4.3	WBGene00009158	-0.122	0.203	0.024	-0.325	-0.146	0.179				down
Q9U330	sac-2	SAC domain-containing protein	WBGene00012353	-0.234	0.286	0.159	-0.52	-0.393	0.127				down	down
Q23644	zhit-3	HIT-type domain-containing protein	WBGene00006489	1.324	0.285	0.078	1.039	1.246	0.207	up			up	up
Q21193	pfn-3	Profilin-3	WBGene00003991	0.006	0.378	0.174	-0.371	-0.168	0.203		up		down
Q18786	snr-4	Probable small nuclear ribonucleoprotein Sm D2	WBGene00004917	-0.861	0.348	-0.17	-1.208	-0.69	0.518	down			down	down
P49029	mag-1	Protein mago nashi homolog	WBGene00003123	-0.179	0.349	0.11	-0.527	-0.289	0.239				down
O01869	rps-10	S10_plectin domain-containing protein	WBGene00004479	0.103	-0.073	-0.045	0.176	0.148	-0.028	up			up	up
A3QM97	cnnm-1	Metal transporter cnnm-1	WBGene00016879	-0.155	0.099	-0.017	-0.253	-0.137	0.116	down			down
Q23500	aco-1	Cytoplasmic aconitate hydratase	WBGene00000040	-0.189	-0.01	-0.079	-0.179	-0.11	0.069	down			down	down
P91517	CELE_T28A11.19	DUF19 domain-containing protein	WBGene00020881	0.595	-0.047	0.005	0.642	0.59	-0.052	up			up	up
Q9N4Y8	nuo-5	NADH-ubiquinone oxidoreductase 75 kDa subunit, mitochondrial	WBGene00021562	0.29	0.012	0.626	0.278	-0.337	-0.614	up		up	up	down	down
Q4W5H0	CELE_Y51F10.11	Uncharacterized protein	WBGene00044438	-1.108	-0.237	-0.534	-0.871	-0.573	0.298	down			down	down
Q9N4J7	CELE_F54A3.2	Uncharacterized protein	WBGene00018781	-0.346	0.531	0.183	-0.877	-0.529	0.348				down	down
O45105	col-101	Col_cuticle_N domain-containing protein	WBGene00000675	0.505	0.143	-0.05	0.362	0.554	0.192	up			up	up
Q20157	mpdu-1	Mannose-P-dolichol utilization defect 1 protein homolog	WBGene00018181	-0.249	0.278	-0.014	-0.527	-0.235	0.292				down
Q9XTZ3	C18D11.3	Uncharacterized protein	WBGene00007681	1.655	0.391	0.179	1.264	1.476	0.212	up			up	up
A0A1I6CM93	tag-243	Costars domain-containing protein	WBGene00044078	0.615	-0.017	0.216	0.632	0.398	-0.233	up			up	up
Q8I4E2	lst-4	Sorting nexin lst-4	WBGene00003086	-0.278	-0.009	0.115	-0.269	-0.393	-0.124	down			down	down
Q9U309	CELE_Y105C5B.15	Purple acid phosphatase	WBGene00013654	-0.268	0.152	-0.25	-0.42	-0.018	0.402	down			down		up
Q27531	cyp-14a5	CYtochrome P450 family	WBGene00000373	0.621	0.084	0.244	0.537	0.377	-0.16	up			up	up
B1GRL5	trpp-1	Trafficking protein particle complex subunit	WBGene00077643	-0.278	0.349	0.15	-0.626	-0.428	0.199				down	down
Q23166	CELE_W04G3.5	Pribosyltran_N domain-containing protein	WBGene00012258	-0.327	-0.117	0.051	-0.211	-0.379	-0.168	down			down	down	down
O16294	F32D1.5	GMP reductase	WBGene00017984	-0.195	0.069	0.104	-0.265	-0.299	-0.035	down			down	down
Q9XWI1	CELE_Y54E2A.4	SEC63 domain-containing protein	WBGene00013189	-0.215	0.017	-0.035	-0.232	-0.18	0.053	down			down	down
P32742	ikke-1	Inhibitor of nuclear factor kappa-B kinase epsilon subunit homolog 1	WBGene00011299	-0.47	0.08	-0.004	-0.55	-0.466	0.084	down			down	down
Q21430	pix-1	PIX (PAK (p21-activated kinase) Interacting eXchange factor) homolog	WBGene00010776	-0.157	0.188	0.118	-0.345	-0.275	0.07				down	down
Q21122	pfkb-1.2	6-phosphofructo-2-kinase/fructose-2,6-bisphosphatase	WBGene00019295	-0.289	-0.061	-0.116	-0.228	-0.173	0.055	down			down	down
A8WFI7	oga-1	O-GlcNAc selective N-Acetyl-beta-D-glucosaminidase (O-GlcNAcase)	WBGene00020596	-0.666	-0.055	-0.082	-0.611	-0.585	0.026	down			down	down
O45319	tin-13	Mitochondrial import inner membrane translocase subunit tim-13	WBGene00006574	0.277	0.053	-0.234	0.223	0.51	0.287	up		down	up	up	up
Q19905	sqv-4	UDP-glucose 6-dehydrogenase	WBGene00005022	0.027	-0.152	-0.046	0.179	0.073	-0.107		down		up
H2KYN0	vps-45	Related to yeast Vacuolar Protein Sorting factor	WBGene00016643	-0.355	-0.116	-0.08	-0.239	-0.275	-0.036	down			down	down
Q9U3Q6	ugt-22	UDP-glucuronosyltransferase	WBGene00007455	-0.334	-0.032	0.139	-0.302	-0.473	-0.171	down			down	down
P90921	asg-1	Probable ATP synthase subunit g 1, mitochondrial	WBGene00000209	-0.186	0.428	0.568	-0.614	-0.754	-0.14			up	down	down
Q9BKS1	elc-1	Elongin-C	WBGene00001236	-0.25	0.095	-0.019	-0.346	-0.231	0.114	down			down	down
Q9N5L0	trm-2a	tRNA (uracil(54)-C(5))-methyltransferase	WBGene00019241	0.91	0.425	0.215	0.485	0.696	0.21	up	up		up	up
Q18359	C33A12.1	Probable NADH dehydrogenase [ubiquinone] 1 alpha subcomplex subunit 5	WBGene00007880	0.253	-0.075	0.472	0.328	-0.219	-0.547	up		up	up	down	down
Q9N4E2	CELE_Y73C8B.3	Uncharacterized protein	WBGene00022260	-0.097	0.194	-0.024	-0.291	-0.072	0.218				down		up
P90778	C55A6.3	Uncharacterized protein	WBGene00008332	-0.416	0.169	0.011	-0.586	-0.428	0.158	down			down	down
A0A0K3ATN9	tom-1	LLGL domain-containing protein	WBGene00006594	-0.383	0.003	-0.026	-0.386	-0.357	0.029	down			down	down
Q18803	asg-2	Probable ATP synthase subunit g 2, mitochondrial	WBGene00000210	-0.167	0.143	0.048	-0.31	-0.215	0.095				down	down
P30635	trxr-2	Probable glutathione reductase 2	WBGene00014028	-0.554	0.222	-0.071	-0.776	-0.482	0.294	down			down	down
H2KZ54	tbc-7	Rab-GAP TBC domain-containing protein	WBGene00016292	-0.411	0.018	-0.123	-0.429	-0.288	0.141	down			down	down
Q95XJ0	CELE_Y69A2AR.18	Uncharacterized protein	WBGene00022089	-0.124	0.045	-0.033	-0.169	-0.091	0.078	down			down
Q9BLA0	fubl-3	FUBp (FUBP) Like	WBGene00016489	-0.422	-0.093	-0.063	-0.329	-0.359	-0.029	down			down	down
Q22752	dyrb-1	Dynein light chain roadblock	WBGene00012004	-0.333	0.049	-0.071	-0.382	-0.262	0.12	down			down	down
A0A4V0ILM7	pkn-1	Protein kinase C	WBGene00009793	-0.313	-0.008	0.183	-0.305	-0.496	-0.191	down			down	down
A0A1T5HUK9	aakg-1	AMP-Activated protein Kinase Gamma subunit	WBGene00013732	-0.2	0.092	0.172	-0.293	-0.372	-0.079	down			down	down
Q9N2Z6	ptr-21	SSD domain-containing protein	WBGene00004235	-0.445	-0.14	-0.214	-0.305	-0.231	0.074	down		down	down	down
Q17527	B0564.2	Fe2OG dioxygenase domain-containing protein	WBGene00007202	-0.577	0.165	-0.171	-0.742	-0.406	0.336	down			down
Q09501	ifp-1	Intermediate filament protein ifp-1	WBGene00002067	-0.248	0.076	0.198	-0.324	-0.446	-0.122	down			down	down
Q10010	T19C3.4	Uncharacterized protein T19C3.4	WBGene00020562	-0.359	0.001	-0.056	-0.36	-0.303	0.057	down			down	down
G5EFL1	hex-2	Beta-N-acetylhexosaminidase	WBGene00015767	-0.263	0.118	0.135	-0.381	-0.398	-0.017	down			down	down
Q93242	ugt-23	UDP-glucuronosyltransferase	WBGene00007650	-0.353	-0.074	0.056	-0.279	-0.409	-0.13	down			down	down
P52874	clpf-1	Protein clpf-1	WBGene00010304	-0.43	0.101	-0.09	-0.531	-0.34	0.191	down			down	down
Q23027	inx-5	Innexin-5	WBGene00002127	-0.334	0.321	0.045	-0.655	-0.379	0.277				down	down
Q9XU56	ensa-1	ENdoSulfine Alpha	WBGene00010730	-0.239	0.261	0.25	-0.5	-0.488	0.011				down	down
O02207	oxa-1	OXA mitochondrial inner membrane insertase homolog	WBGene00007215	0.374	-0.024	-0.141	0.398	0.515	0.117	up			up	up
O16298	hpo-18	Uncharacterized protein	WBGene00017982	-0.381	0.107	-0.281	-0.488	-0.1	0.388	down			down		up
A3QMB6	oac-59	Acyl_transf_3 domain-containing protein	WBGene00016585	-0.199	0.154	0.086	-0.353	-0.285	0.068				down	down
Q18822	alh-10	Aldedh domain-containing protein	WBGene00000116	0.079	-0.185	-0.128	0.264	0.207	-0.056				up	up
Q8MXS8	CELE_Y47G6A.22	Uncharacterized protein	WBGene00021647	-0.263	0.011	-0.237	-0.274	-0.026	0.247	down		down	down		up
G5EFP4	sym-1	SYM-1 protein	WBGene00006366	0.152	-0.448	-0.31	0.6	0.462	-0.139		down		up	up
G5EET3	cdr-6	CaDmium Responsive	WBGene00010471	-0.299	0.112	0.267	-0.411	-0.566	-0.155	down			down	down
P34558	T05G5.5	Uncharacterized protein T05G5.5	WBGene00011500	-0.487	-0.097	-0.083	-0.391	-0.405	-0.014	down			down	down
Q9U1Z6	abhd-3.1	Hydrolase_4 domain-containing protein	WBGene00013358	-0.015	-0.459	-0.108	0.443	0.093	-0.35		down		up		down
Q7YTL0	CELE_R186.8	Uncharacterized protein	WBGene00011309	0.052	0.577	-0.139	-0.525	0.191	0.716		up		down		up
O62210	CELE_F32H5.3	Uncharacterized protein	WBGene00009349	-0.643	0.285	-0.286	-0.928	-0.357	0.571	down			down
P34609	unc-16	JNK-interacting protein	WBGene00006755	-0.31	0.009	0.079	-0.319	-0.389	-0.07	down			down	down
Q11188	popl-1	Ribonucleases P/MRP protein subunit popl-1	WBGene00015486	-0.726	-1.413	-1.609	0.688	0.884	0.196	down	down	down	up	up
Q95XR1	tbca-1	Tubulin-specific chaperone A	WBGene00021475	0.463	-0.007	-0.059	0.47	0.522	0.053	up			up	up
Q7YTR9	C27B7.9	Uncharacterized protein	WBGene00007765	0.578	-0.269	-0.289	0.846	0.866	0.02	up			up	up
O62220	F33H2.3	Acidic leucine-rich nuclear phosphoprotein 32-related protein 1	WBGene00009367	0.604	0.045	0.066	0.56	0.538	-0.022	up			up	up
E2JKZ0	dnc-1	Dynactin subunit 1	WBGene00001017	-0.286	0.017	-0.019	-0.304	-0.267	0.036	down			down	down
P0AC92	gnsA	Protein GnsA		1.06	-1.098	0.318	2.159	0.742	-1.417				up
Q18198	C26B9.5	Uncharacterized protein	WBGene00016134	-0.287	0.046	0.004	-0.333	-0.29	0.042	down			down	down
Q9U1V9	dnj-29	J domain-containing protein	WBGene00001047	-0.123	0.052	-0.06	-0.175	-0.063	0.112	down			down
Q9TXR7	CELE_F56B3.11	Mitochondrial import inner membrane translocase subunit Tim21	WBGene00018934	0.268	-0.065	-0.112	0.333	0.38	0.048	up			up	up
Q9XWV1	CELE_Y37D8A.3	Uncharacterized protein	WBGene00012545	0.521	-0.124	0.052	0.644	0.468	-0.176	up			up	up
P0A6T1	pgi	Glucose-6-phosphate isomerase		-0.502	0.056	-0.307	-0.558	-0.195	0.362	down			down
H2KZY6	marg-1	Pharyngeal MARGginal cell marker	WBGene00018538	-0.293	0.046	0.043	-0.339	-0.335	0.004	down			down	down
Q9NHZ6	oaz-1	Ornithine decarboxylase antizyme	WBGene00022748	-0.264	0.222	0.089	-0.485	-0.352	0.133				down	down
A0A0K3AXD0	C52D10.3	DUF4140 domain-containing protein	WBGene00016877	-0.408	0.06	0.3	-0.468	-0.708	-0.24	down			down	down
G5EBS1	gro-1	tRNA isopentenyl transferase	WBGene00001740	0.669	-0.182	-0.208	0.851	0.877	0.026	up			up	up
Q9GYI1	CELE_F29B9.11	Uncharacterized protein	WBGene00017925	0.414	-0.064	0.289	0.478	0.125	-0.353	up			up		down
Q94045	T13F2.2	Putative RNA polymerase II transcriptional coactivator	WBGene00011743	0.403	-0.313	0.174	0.716	0.229	-0.487				up
O44509	CELE_F42G8.10	NADH dehydrogenase [ubiquinone] 1 beta subcomplex subunit 11, mitochondrial	WBGene00018361	0.314	-0.048	0.549	0.362	-0.235	-0.597	up		up	up	down	down
Q4W4Z2	rad-8	Reticulon-4-interacting protein 1, mitochondrial	WBGene00044305	0.151	-0.192	-0.362	0.343	0.513	0.169			down	up	up
Q9NAH4	Y47D3A.21	Density-regulated protein homolog	WBGene00012932	-0.266	0.123	-0.077	-0.389	-0.189	0.2	down			down
Q21285	dao-3	Methenyltetrahydrofolate cyclohydrolase	WBGene00000929	-0.231	0.023	0.088	-0.254	-0.319	-0.064	down			down	down
C2BR97	smg-3	Suppressor with Morphological effect on Genitalia	WBGene00004881	-0.426	0.108	-0.066	-0.535	-0.361	0.174	down			down	down
Q21921	sir-2.1	NAD-dependent protein deacetylase sir-2.1	WBGene00004800	-0.061	0.715	-0.065	-0.777	0.004	0.781		up		down		up
G5EFH8	cbs-1	PALP domain-containing protein	WBGene00013866	-0.088	0.236	0.054	-0.323	-0.142	0.181				down
Q9N4A7	npp-20	Protein SEC13 homolog	WBGene00003806	0.126	-0.048	0.044	0.174	0.082	-0.092	up			up
Q19752	fntb-1	Protein farnesyltransferase subunit beta	WBGene00006465	-0.24	0.182	0.155	-0.422	-0.395	0.027				down	down
Q20502	haly-1	Histidine ammonia-lyase	WBGene00009813	-0.075	0.141	-0.111	-0.216	0.036	0.252				down		up
H2KYJ6	gpx-6	Glutathione peroxidase	WBGene00020373	0.852	-0.31	-0.415	1.163	1.267	0.105	up			up	up
A0A4V0ILI5	nova-1	KH domain-containing protein	WBGene00013347	-0.234	0.067	0.123	-0.301	-0.357	-0.055	down			down	down
Q4R139	CELE_T23B12.11	Uncharacterized protein	WBGene00044553	-0.26	0.337	0.259	-0.597	-0.519	0.078				down	down
G5EBV5	flp-12	FMRF-Like Peptide	WBGene00001455	-0.2	0.47	0.212	-0.67	-0.412	0.258				down	down
Q18187	C25H3.3	4HBT domain-containing protein	WBGene00016112	-0.307	0.23	-0.231	-0.537	-0.076	0.461				down		up
Q9N4I1	dnc-5	DyNactin Complex component	WBGene00022118	-0.247	0.412	0.085	-0.659	-0.332	0.327				down
Q22508	tag-18	Uncharacterized protein	WBGene00006408	-0.245	-0.034	0.051	-0.211	-0.295	-0.084	down			down	down
Q20330	ifo-1	Intermediate Filament Organize	WBGene00018350	-0.246	0.054	0.042	-0.3	-0.288	0.012	down			down	down
H2KZR3	unc-96	Uncharacterized protein	WBGene00006825	-0.112	0.107	0.147	-0.219	-0.26	-0.041				down	down
Q8TA83	dnj-10	DnaJ homolog dnj-10	WBGene00001028	-0.296	0.098	-0.658	-0.394	0.362	0.756	down		down	down	up	up
P91544	CELE_ZC204.12	Uncharacterized protein	WBGene00022562	-0.195	0.093	0.071	-0.287	-0.265	0.022	down			down	down
O76337	ced-6	Cell death protein 6	WBGene00000420	-0.25	0.101	-0.009	-0.351	-0.241	0.11	down			down	down
Q20921;Q20922	col-160	Col_cuticle_N domain-containing protein	WBGene00000733	0.881	0.208	-0.226	0.672	1.107	0.434	up			up	up
O02345	nstp-5	Nucleotide Sugar TransPorter family	WBGene00014139	-0.275	0.255	-0.081	-0.531	-0.194	0.336				down
O02158	CELE_T09B4.8	Uncharacterized protein	WBGene00020382	0.349	-0.45	-0.063	0.8	0.412	-0.388				up
P55216	cth-2	Putative cystathionine gamma-lyase 2	WBGene00022856	-0.385	0.007	-0.467	-0.392	0.082	0.475	down		down	down		up
Q18685	unc-112	Protein unc-112	WBGene00006836	-0.09	0.087	0.054	-0.177	-0.144	0.033				down	down
I2HAE1	CELE_Y38F2AR.3	Uncharacterized protein	WBGene00021421	0.735	-0.372	0.189	1.107	0.547	-0.561	up			up
Q22781	acdh-7	Acyl CoA DeHydrogenase	WBGene00020812	-0.272	-0.032	-0.016	-0.239	-0.256	-0.017	down			down	down
Q18095	C18E9.4	NADH dehydrogenase [ubiquinone] 1 beta subcomplex subunit 3	WBGene00007684	0.484	0.089	0.83	0.395	-0.346	-0.741	up		up	up	down	down
Q27476	cyp-25a2	CYtochrome P450 family	WBGene00007964	-0.623	-0.092	0.274	-0.531	-0.897	-0.365	down			down	down
Q9N4F4	gpa-17	G Protein, Alpha subunit	WBGene00022196	-0.164	0.131	0.214	-0.295	-0.378	-0.084			up	down	down
P91252	gst-6	Probable glutathione S-transferase 6	WBGene00001754	-0.356	0.002	-0.335	-0.357	-0.021	0.337	down		down	down		up
P02566	unc-54	Myosin-4	WBGene00006789	0.064	0.208	0.108	-0.144	-0.044	0.1		up	up	down
G5ECE7	C34E7.4	Uncharacterized protein	WBGene00007934	0.106	0.407	0.219	-0.301	-0.113	0.188		up	up	down
Q18264	tmem-131	TMEM131_like domain-containing protein	WBGene00016170	-0.282	0.058	-0.029	-0.34	-0.253	0.087	down			down	down
Q18014	C15C7.7	GDP-fucose protein O-fucosyltransferase 1	WBGene00015793	-0.435	0.056	-0.01	-0.492	-0.425	0.066	down			down	down
Q9N3D0	sec-11	Signal peptidase complex catalytic subunit SEC11	WBGene00021844	-0.267	0.063	-0.104	-0.33	-0.163	0.167	down			down
Q9BI63	trpp-8	TRansport Protein Particle	WBGene00018512	-0.331	0.028	0.046	-0.359	-0.376	-0.018	down			down	down
Q9U757	nxt-1	NTF2-related export protein	WBGene00003836	0.399	0.16	0.123	0.24	0.276	0.036	up			up	up
Q22918	C37C3.2	Eukaryotic translation initiation factor 5	WBGene00016496	0.233	0.049	0.16	0.184	0.073	-0.111	up		up	up
Q19625	mrp-6	Uncharacterized protein	WBGene00003412	-0.028	-0.803	0.235	0.775	-0.263	-1.038		down		up		down
Q09411	K10D2.5	Uncharacterized protein K10D2.5	WBGene00019631	1.011	0.131	0.272	0.881	0.739	-0.142	up			up	up
H2FLG9	grsp-2	Glycine Rich Secreted Protein	WBGene00012118	0.324	-0.088	0.042	0.412	0.282	-0.13	up			up	up
P30627	glb-1	Globin-like protein	WBGene00014030	-0.526	0.248	0.397	-0.774	-0.923	-0.15	down			down	down
Q09511	rsp-4	Probable splicing factor, arginine/serine-rich 4	WBGene00004701	0.282	-0.051	0.016	0.333	0.266	-0.067	up			up	up
Q23669	vps-15	Non-specific serine/threonine protein kinase	WBGene00014151	-0.196	0.107	0.043	-0.303	-0.239	0.065	down			down	down
Q21504	CELE_M04B2.4	DAO domain-containing protein	WBGene00010847	-0.244	0.203	-0.154	-0.448	-0.091	0.357				down		up
P22981	let-60	Ras protein let-60	WBGene00002335	-0.312	0.034	0.047	-0.345	-0.359	-0.013	down			down	down
H2KYC9	C01B10.6	EGF-like domain-containing protein	WBGene00015280	-0.641	0.045	-0.199	-0.686	-0.442	0.244	down			down	down
O17754	egl-21	Carboxypeptidase E	WBGene00001189	-0.184	0.319	0.215	-0.503	-0.399	0.103				down	down
Q21233	nuo-4	NADH dehydrogenase [ubiquinone] 1 alpha subcomplex subunit 10, mitochondrial	WBGene00019401	0.188	-0.026	0.233	0.214	-0.044	-0.258	up		up	up		down
Q22744	rsf-1	Ras association domain-containing protein 1 homolog	WBGene00011995	-0.238	0.676	0.044	-0.914	-0.282	0.632				down
O02267	CELE_F45H10.3	NADH dehydrogenase [ubiquinone] 1 alpha subcomplex subunit 7	WBGene00009740	0.372	0.024	0.837	0.348	-0.465	-0.814	up		up	up	down	down
O02168	aakg-2	AMP-Activated protein Kinase Gamma subunit	WBGene00020633	-0.373	-0.118	-0.007	-0.255	-0.365	-0.11	down			down	down
P90933	CELE_M04C9.3	Uncharacterized protein	WBGene00010858	-0.392	-0.05	-0.202	-0.342	-0.19	0.151	down			down
G4RYA5	CELE_F38A1.8	SRP54 domain-containing protein	WBGene00009521	-0.195	0.087	0.006	-0.283	-0.202	0.081	down			down	down
H2KYJ2	ttr-59	TransThyretin-Related family domain	WBGene00020339	-0.138	0.2	-0.002	-0.338	-0.136	0.202				down
Q9BL86	mrpl-38	Mitochondrial Ribosomal Protein, Large	WBGene00021327	0.237	-0.11	-0.282	0.347	0.519	0.172	up		down	up	up
Q9XWI6	eif-3.B	Eukaryotic translation initiation factor 3 subunit B	WBGene00001225	0.239	0.06	0.035	0.179	0.204	0.025	up			up	up
V6CLA2	hecd-1	E3 ubiquitin-protein ligase hecd-1	WBGene00016405	-0.166	0.109	0.05	-0.275	-0.216	0.059				down	down
Q9N537	szy-2	Suppressor of ZYg-1	WBGene00021312	0.313	-0.078	0.241	0.392	0.072	-0.32	up			up		down
Q18453	rsd-3	ENTH domain-containing protein	WBGene00004682	-0.333	-0.034	0.047	-0.299	-0.381	-0.082	down			down	down
Q21624	cor-1	Coronin-like protein cor-1	WBGene00000768	0.228	0.076	0.1	0.152	0.128	-0.024	up			up	up
Q22957	F10G2.1	UPF0376 protein F10G2.1	WBGene00017362	-0.115	0.473	0.083	-0.588	-0.199	0.39		up		down
Q93538	rbg-1	Rab3 GTPase-activating protein catalytic subunit	WBGene00004317	-0.433	-0.046	0.002	-0.387	-0.435	-0.048	down			down	down
G5ECY6	chn-1	RING-type E3 ubiquitin transferase	WBGene00000500	-0.288	0.118	-0.094	-0.406	-0.194	0.212	down			down
O61787	inx-16	Innexin-16	WBGene00002138	-0.485	0.166	-0.014	-0.651	-0.471	0.18	down			down	down
O45430	mccc-1	MethylCrotonoyl-Coenzyme A Carboxylase (Alpha)	WBGene00009319	-0.226	-0.092	-0.218	-0.134	-0.008	0.126	down		down	down		up
K8ERU3	hpo-27	Uncharacterized protein	WBGene00016418	-0.328	0.032	0.019	-0.359	-0.347	0.013	down			down	down
Q9NEX2	gtf-2A2	Transcription initiation factor IIA subunit 2	WBGene00013736	0.413	-0.429	0.246	0.841	0.166	-0.675				up		down
O62289	ttr-51	TransThyretin-Related family domain	WBGene00010440	-0.77	0.233	-0.142	-1.003	-0.628	0.375	down			down	down
A0A8D9I6U5	usp-5	Ubiquitin carboxyl-terminal hydrolase		-0.124	0.088	-0.005	-0.212	-0.119	0.093				down
P28548	kin-10	Casein kinase II subunit beta	WBGene00002196	-0.181	0.125	0.004	-0.307	-0.186	0.121				down	down
P10567	unc-15	Paramyosin	WBGene00006754	-0.076	0.195	0.089	-0.27	-0.165	0.105				down	down
Q8IFX6	CELE_K06A9.1	Uncharacterized protein	WBGene00019435	-0.381	-0.022	0.237	-0.359	-0.618	-0.259	down			down	down	down
Q04907	mrpl-32	Probable 39S ribosomal protein L32, mitochondrial	WBGene00016249	0.289	-0.682	-0.252	0.97	0.541	-0.43				up
Q20263	eas-1	Probable Golgi transport protein 1	WBGene00018270	-0.255	0.183	0.143	-0.437	-0.397	0.04				down	down
P34525	spcs-3	Signal peptidase complex subunit 3	WBGene00019679	-0.133	0.066	-0.124	-0.199	-0.009	0.19	down			down		up
O44983	CELE_K02F2.5	Uncharacterized protein	WBGene00019324	-0.676	0.534	0.333	-1.21	-1.009	0.201				down	down
P90994	djr-1.1	Glutathione-independent glyoxalase DJR-1.1	WBGene00015184	-0.192	0.116	-0.169	-0.308	-0.024	0.284	down			down		up
D6RYD9	gfrp-1	GTP cyclohydrolase 1 feedback regulatory protein	WBGene00044736	-0.272	0.49	-0.016	-0.761	-0.256	0.505				down
Q9BKQ9	cisd-3.2	CDGSH Iron Sulfur Domain protein homolog	WBGene00022053	0.164	-0.055	0.217	0.219	-0.053	-0.272	up		up	up		down
Q21929	dhs-21	L-xylulose reductase	WBGene00000984	-0.406	-0.124	0.17	-0.282	-0.576	-0.294	down			down	down	down
Q22285	ttr-46	Transthyretin-like protein 46	WBGene00011571	-0.131	0.55	0.682	-0.681	-0.813	-0.132		up	up	down	down
P91354	zipt-11	Zrt (ZRT), Irt-(IRT-) like Protein Transporter	WBGene00019077	-0.698	0.345	-0.08	-1.044	-0.619	0.425	down			down
Q22341	ttr-30	TransThyretin-Related family domain	WBGene00020335	-0.275	0.234	-0.103	-0.51	-0.172	0.337				down
Q95XI7	CELE_Y69A2AR.16	Uncharacterized protein	WBGene00022087	-0.318	0.117	-0.043	-0.436	-0.275	0.161	down			down	down
P90983	rps-29	40S ribosomal protein S29	WBGene00004498	0.554	-0.436	0.351	0.99	0.203	-0.786				up		down
O45087	dyci-1	WD_REPEATS_REGION domain-containing protein	WBGene00015927	-0.215	-0.034	0.06	-0.18	-0.275	-0.094	down			down	down
Q22498	copg-1	Probable coatomer subunit gamma	WBGene00011775	-0.079	0.057	0.054	-0.137	-0.133	0.003				down	down
Q95Y72	dss-1	Probable 26S proteasome complex subunit dss-1	WBGene00022492	-0.027	1.385	0.075	-1.413	-0.102	1.31		up		down		up
H2KYE1	CELE_R11G1.6	Uncharacterized protein	WBGene00020012	-0.163	0.104	0.03	-0.267	-0.193	0.074				down	down
O18181	CELE_W09D10.1	Arf-GAP domain-containing protein	WBGene00012359	-0.185	-0.008	-0.005	-0.177	-0.18	-0.003	down			down	down
Q27389	rpl-16	60S ribosomal protein L13a	WBGene00004428	0.27	-0.096	-0.014	0.366	0.284	-0.082	up			up	up
P27253	scpA	Methylmalonyl-CoA mutase		0.165	-1.332	0.268	1.497	-0.103	-1.6		down		up		down
O18211	mop-25.2	MO25-like protein 2	WBGene00013140	-0.208	0.108	0.061	-0.316	-0.269	0.047	down			down	down
Q9XWH0	bub-3	Mitotic checkpoint protein bub-3	WBGene00013209	0.292	-0.159	0.164	0.451	0.128	-0.323	up			up
A0A2C9C3E8	unc-68	Uncharacterized protein	WBGene00006801	-0.253	0.025	0.074	-0.277	-0.327	-0.05	down			down	down
P17330	gpd-3	Glyceraldehyde-3-phosphate dehydrogenase 3	WBGene00001685	-0.127	0.16	-0.217	-0.287	0.09	0.377			down	down		up
Q20496	rhi-1	Probable rho GDP-dissociation inhibitor	WBGene00004356	-0.09	-0.249	-0.072	0.159	-0.018	-0.177		down		up		down
Q21096	miga-1	MItoGuArdin homolog	WBGene00010465	-0.425	0.307	-0.001	-0.732	-0.424	0.309				down
Q22230	decr-1.3	Probable 2,4-dienoyl-CoA reductase 3 [(3E)-enoyl-CoA-producing]	WBGene00011467	-0.343	0.642	-0.074	-0.984	-0.269	0.716				down		up
O01759	ppk-1	PIPK domain-containing protein	WBGene00004087	-0.392	-0.011	0.001	-0.381	-0.393	-0.012	down			down	down
Q23268	cest-2.3	COesterase domain-containing protein	WBGene00013873	-0.421	0.295	0.033	-0.717	-0.454	0.263				down	down
O18253	CELE_Y57G11C.31	Nucleotid_trans domain-containing protein	WBGene00013321	-0.178	0.285	-0.025	-0.463	-0.154	0.31				down
P34552	alx-1	Apoptosis-linked gene 2-interacting protein X 1	WBGene00007010	-0.152	0.045	-0.058	-0.197	-0.094	0.103	down			down
Q9XXH8	cnt-1	Arf-GAP with ANK repeat and PH domain-containing protein cnt-1	WBGene00000565	-0.26	0.242	0.053	-0.503	-0.314	0.189				down	down
P34526	K12H4.5	Uncharacterized protein K12H4.5	WBGene00019680	0.307	-0.012	0.786	0.318	-0.48	-0.798	up		up	up	down	down
Q21962	gldc-1	Glycine cleavage system P protein	WBGene00020022	-0.231	-0.068	-0.202	-0.163	-0.029	0.134	down		down	down		up
Q9U2S4	arf-6	ADP-ribosylation factor 6	WBGene00000184	-0.178	0.043	0.075	-0.221	-0.252	-0.032	down			down	down
Q17778	nuc-1	Deoxyribonuclease-2	WBGene00003828	-0.743	-0.178	0.279	-0.564	-1.022	-0.457	down			down	down	down
Q11182	vps-16	Vacuolar protein sorting-associated protein 16 homolog	WBGene00006516	-0.309	0.023	0.038	-0.332	-0.347	-0.015	down			down	down
O62388;P49622	CELE_W01D2.1	Ribosomal protein L37;60S ribosomal protein L37	WBGene00012179	1.727	-0.053	0.174	1.78	1.552	-0.228	up			up	up
Q03563	spk-1	Serine/threonine-protein kinase spk-1	WBGene00004980	-0.198	0.215	0.174	-0.413	-0.373	0.04				down	down
Q09390	hmg-1.2	High mobility group protein 1.2	WBGene00001972	-0.147	0.367	0.161	-0.514	-0.308	0.206				down
G5EE41	cuc-1	Copper chaperone	WBGene00000835	-0.739	-0.382	-1.215	-0.357	0.476	0.833	down	down	down	down	up	up
Q21916	CELE_R10H10.3	Uncharacterized protein	WBGene00011222	-0.618	-0.18	-0.562	-0.438	-0.055	0.383	down		down	down		up
G5EF01	tbb-6	Tubulin beta chain	WBGene00006539	0.058	-0.491	-0.454	0.549	0.512	-0.037		down	down	up	up
P34258	B0303.7	Uncharacterized protein B0303.7	WBGene00015128	-0.231	0.057	0.018	-0.288	-0.249	0.039	down			down	down
E2JL04	iars-2	Isoleucine--tRNA ligase	WBGene00002153	-0.13	0.093	-0.014	-0.223	-0.116	0.107				down
H2L0Q1	CELE_ZK6.11	Uncharacterized protein	WBGene00022645	-0.009	0.331	0.446	-0.34	-0.456	-0.115		up	up	down	down
O61866	lipl-5	Lipase lipl-5	WBGene00022642	-1.068	-0.52	-0.375	-0.549	-0.693	-0.145	down	down		down	down
Q23227	zmp-4	ZnMc domain-containing protein	WBGene00012364	-0.028	0.314	-0.091	-0.343	0.063	0.406		up		down		up
Q9N4F3	apb-1	AP complex subunit beta	WBGene00000160	-0.133	0.029	0.038	-0.162	-0.171	-0.009	down			down	down
P24887	nduo-1	NADH-ubiquinone oxidoreductase chain 1	WBGene00010959	-0.138	0.513	0.727	-0.651	-0.864	-0.213		up	up	down	down
G5EEZ1	CELE_W09G3.7	Uncharacterized protein	WBGene00012370	-0.162	0.213	0.041	-0.375	-0.203	0.171				down
O16368	rpt-2	Probable 26S proteasome regulatory subunit 4	WBGene00004502	-0.173	0.012	0.033	-0.185	-0.206	-0.021	down			down	down
Q18697	pitr-1	Phosphate transporter	WBGene00016739	-0.333	0.528	0.165	-0.861	-0.498	0.363				down
Q22966	clec-1	C-type lectin domain-containing protein	WBGene00017772	-0.586	-0.22	-0.01	-0.366	-0.576	-0.21	down			down	down
O62122	gcsh-1	Glycine cleavage system H protein	WBGene00008354	-0.423	-0.024	-0.212	-0.398	-0.211	0.187	down			down
P49180	rpl-33	60S ribosomal protein L35a	WBGene00004447	0.272	0.024	0.115	0.248	0.157	-0.091	up			up	up
P34815	unc-18	Putative acetylcholine regulator unc-18	WBGene00006757	-0.237	-0.014	0.05	-0.223	-0.286	-0.063	down			down	down
Q17335	H24K24.3	Alcohol dehydrogenase class-3	WBGene00019240	0.157	-0.134	0.118	0.29	0.039	-0.251				up		down
O76258	tsg-101	Tumor Susceptibility Gene homolog	WBGene00015658	-0.304	-0.096	0.059	-0.208	-0.363	-0.155	down			down	down	down
Q95Y83	mrpl-19	Probable 39S ribosomal protein L19, mitochondrial	WBGene00022470	-0.242	0.228	-0.299	-0.47	0.057	0.527				down		up
Q965G5	mak-2	MAP kinase-activated protein kinase mak-2	WBGene00007007	-0.505	0.06	0.049	-0.565	-0.554	0.011	down			down	down
Q17345	ccf-1	CCR4-NOT transcription complex subunit 7	WBGene00000369	-0.466	-0.047	-0.055	-0.419	-0.411	0.007	down			down	down
A0A486WV58	CELE_W09B6.4	Uncharacterized protein	WBGene00021104	0.428	-0.065	-0.081	0.493	0.509	0.016	up			up	up
O17599	rap-2	Small monomeric GTPase	WBGene00004308	-0.176	0.249	-0.051	-0.424	-0.125	0.299				down
Q9XWV3	arx-5	Probable actin-related protein 2/3 complex subunit 3	WBGene00000203	-0.175	0.507	0.208	-0.682	-0.383	0.299				down
O45083	cest-4	COesterase domain-containing protein	WBGene00015930	-0.308	-0.014	0.098	-0.293	-0.405	-0.112	down			down	down
Q19204	adt-2	A disintegrin and metalloproteinase with thrombospondin motifs adt-2	WBGene00000083	0.49	-0.09	0.255	0.58	0.235	-0.346	up			up
Q9BKR5	CELE_Y82E9BR.18	Uncharacterized protein	WBGene00022350	-0.154	0.205	-0.043	-0.359	-0.111	0.248				down
A0A2R8F5A8	CELE_F53G2.12	Complex1_LYR_dom domain-containing protein	WBGene00302998	-0.395	0.46	-0.057	-0.855	-0.337	0.517				down
O45144	C34H4.1	Uncharacterized protein	WBGene00016424	0.065	0.501	0.296	-0.436	-0.231	0.205		up		down
Q21930	rpl-28	60S ribosomal protein L28	WBGene00004442	0.241	-0.522	-0.233	0.763	0.474	-0.289				up	up
P90992	misc-1	Mitochondrial 2-oxoglutarate/malate carrier protein	WBGene00015186	-0.21	0.061	-0.165	-0.271	-0.045	0.226	down			down		up
Q09251	rnf-121	RING finger protein 121	WBGene00007626	-0.183	0.274	0.041	-0.457	-0.225	0.233				down
P50464	unc-97	LIM domain-containing protein unc-97	WBGene00006826	-0.131	0.338	0.215	-0.468	-0.346	0.123				down	down
A8WHT8	CELE_K09A9.6	TPR_REGION domain-containing protein	WBGene00010703	-0.208	0.195	0.135	-0.403	-0.342	0.061				down	down
A0A486WX27	npp-21	Nuclear Pore complex Protein	WBGene00019940	-0.096	0.206	0.183	-0.302	-0.279	0.023				down	down
P54813	ymel-1	ATP-dependent zinc metalloprotease YME1 homolog	WBGene00010842	-0.298	0.01	-0.258	-0.307	-0.04	0.268	down		down	down		up
Q9XXJ0	dhps-1	Deoxyhypusine synthase	WBGene00012460	1.112	0.295	0.132	0.816	0.98	0.164	up			up	up
Q9UAV5	mdh-1	Malate dehydrogenase, cytoplasmic	WBGene00018491	-0.049	0.244	0	-0.293	-0.049	0.244		up		down		up
Q23652	usip-1	U6 snRNA-specific terminal uridylyltransferase	WBGene00014124	-0.546	0.18	-0.01	-0.726	-0.536	0.19	down			down	down
Q23614	CELE_ZK822.2	DUF148 domain-containing protein	WBGene00014090	0.239	-0.035	0.106	0.275	0.133	-0.141	up			up
A0A0K3AUD2	imp-3	IntraMembrane Protease (IMPAS) family	WBGene00016378	-0.241	0.102	-0.094	-0.343	-0.147	0.196	down			down
Q09581	lec-3	32 kDa beta-galactoside-binding lectin lec-3	WBGene00002266	-0.455	-0.247	-0.147	-0.208	-0.308	-0.1	down	down		down	down
Q7Z138	aqp-8	AQuaPorin or aquaglyceroporin related	WBGene00000176	-0.233	0.163	0.247	-0.396	-0.481	-0.085				down	down
Q18674	rrp-1	Ribosomal RNA processing protein 1 homolog	WBGene00008151	1.12	0.261	0.218	0.86	0.902	0.043	up			up	up
Q9BI88	F46B6.12	UPF0587 protein F46B6.12	WBGene00009776	-0.3	0.111	-0.039	-0.412	-0.261	0.15	down			down	down
A0A7R9SUL6	cyh-1	CYclin H		-0.212	0.448	0.318	-0.66	-0.53	0.13				down	down
Q95Y71	mrpl-45	Probable 39S ribosomal protein L45, mitochondrial	WBGene00022493	0.406	0.017	-0.479	0.389	0.884	0.495	up		down	up	up	up
G5EC91	dpy-11	Thioredoxin domain-containing protein	WBGene00001073	0.427	0.164	0.014	0.263	0.413	0.15	up			up	up
Q9NHC3	ced-2	Cell death abnormality protein 2	WBGene00000416	-0.382	-0.093	-0.093	-0.288	-0.289	0	down			down	down
B2D6K9	saps-1	Serine/threonine-protein phosphatase 6 regulatory subunit	WBGene00008166	-0.181	0.061	0.068	-0.242	-0.25	-0.007	down			down	down
Q20675	CELE_F52E4.5	Uncharacterized protein	WBGene00018702	0.364	0.021	0.49	0.344	-0.126	-0.469	up		up	up		down
Q95XS2	sec-61.b	Protein transport protein Sec61 subunit beta	WBGene00021427	-0.046	-0.567	-0.122	0.521	0.076	-0.445		down		up		down
Q09369	aqp-10	Putative aquaporin-10	WBGene00000178	-0.475	0.959	0.112	-1.434	-0.586	0.848				down
Q9N4J8	cct-3	T-complex protein 1 subunit gamma	WBGene00018782	0.308	0.114	0.07	0.194	0.238	0.044	up			up	up
Q9BKQ5	rep-1	Rab proteins geranylgeranyltransferase component A 1	WBGene00022051	-0.293	-0.073	-0.162	-0.22	-0.131	0.089	down			down
Q23089	xpo-1	Importin N-terminal domain-containing protein	WBGene00002078	-0.064	0.175	0.131	-0.239	-0.194	0.044				down	down
Q9GYT3	CELE_F35F10.1	PAW domain-containing protein	WBGene00018052	-0.297	0.291	0.322	-0.588	-0.62	-0.032				down	down
O62246	cope-1	Coatomer subunit epsilon	WBGene00009732	-0.147	0.086	0	-0.233	-0.147	0.086				down	down
O45136	C05D2.8	Uncharacterized protein	WBGene00015469	-0.548	-0.216	0.035	-0.332	-0.584	-0.251	down			down	down	down
H2KZD5	csr-1	Piwi domain-containing protein	WBGene00017641	-0.413	-0.099	0.076	-0.315	-0.489	-0.174	down			down	down
Q9GUF2	acp-6	ACid Phosphatase family	WBGene00022245	-0.052	0.38	0.39	-0.433	-0.442	-0.009		up	up	down	down
Q21121	mcu-1	Calcium uniporter protein, mitochondrial	WBGene00019296	-0.192	0.195	0.119	-0.388	-0.311	0.077				down	down
P41949	D1044.1	Uncharacterized kinase-like protein D1044.1	WBGene00017027	-0.352	0.201	0.089	-0.554	-0.441	0.112	down			down	down
Q5DX36	C33F10.14	Semialdhyde_dh domain-containing protein	WBGene00050941	-0.346	-0.073	-0.257	-0.273	-0.089	0.184	down		down	down
P0AFF6	nusA	Transcription termination/antitermination protein NusA		0.855	-1.194	0.867	2.048	-0.013	-2.061				up		down
Q65ZI4	ttr-49	TransThyretin-Related family domain	WBGene00023485	-0.511	0.172	0.123	-0.683	-0.635	0.049	down			down	down
P55955	ttr-16	Transthyretin-like protein 16	WBGene00012382	0.112	0.585	0.169	-0.473	-0.057	0.417		up		down		up
Q9TW45	par-1	Serine/threonine-protein kinase par-1	WBGene00003916	-0.243	0.1	0.072	-0.344	-0.316	0.028	down			down	down
Q9BPN8	Y92H12BR.3	Uncharacterized protein Y92H12BR.3	WBGene00022369	0.156	-0.026	-0.02	0.183	0.176	-0.006	up			up	up
O18230	vti-1	t-SNARE coiled-coil homology domain-containing protein	WBGene00013302	-0.352	0.488	-0.026	-0.84	-0.326	0.514				down
O61792	rpn-8	MPN domain-containing protein	WBGene00004464	0.06	-0.062	-0.016	0.122	0.076	-0.047				up	up
Q94148	rab-10	Ras-related protein Rab-10	WBGene00004273	-0.248	-0.044	0.035	-0.205	-0.284	-0.079	down			down	down
Q9XUH7	C32H11.4	CUB_2 domain-containing protein	WBGene00007867	-0.168	0.659	-0.02	-0.827	-0.148	0.679				down		up
Q9XXQ4	CELE_Y51A2D.18	MFS domain-containing protein	WBGene00013083	-0.186	0.08	-0.133	-0.266	-0.053	0.213	down			down		up
O62265	CELE_F57C2.5	Str_synth domain-containing protein	WBGene00010197	-0.473	-0.215	-0.335	-0.259	-0.138	0.121	down	down	down	down
Q18409	rsp-6	Probable splicing factor, arginine/serine-rich 6	WBGene00004703	-0.386	0.299	0.06	-0.685	-0.447	0.239				down	down
C6KRJ5	CELE_T20D3.14	Uncharacterized protein	WBGene00303026	0.199	-0.269	-0.204	0.467	0.402	-0.065				up	up
Q8I4F7	set-18	Histone-lysine N-methyltransferase set-18	WBGene00044070	0.399	0.069	-0.007	0.331	0.406	0.075	up			up	up
O62337	CELE_R06C1.4	RRM domain-containing protein	WBGene00011059	-0.36	0.3	-0.019	-0.66	-0.341	0.319				down
Q95PX7	tcer-1	WW domain-containing protein	WBGene00022855	-0.047	0.322	0.13	-0.369	-0.177	0.192		up		down
O01479	unc-94	Tropomodulin	WBGene00006823	-0.088	0.106	0.182	-0.194	-0.27	-0.076			up	down	down
H2KZ40	CELE_Y110A7A.9	WD_REPEATS_REGION domain-containing protein	WBGene00022459	-0.438	-0.103	0.074	-0.335	-0.512	-0.177	down			down	down
Q09315	F25B5.3	Putative cytosolic 5'-nucleotidase 3	WBGene00017775	-0.233	0.106	0.172	-0.339	-0.405	-0.066	down			down	down
Q94233	nlp-20	Neuropeptide-Like Protein	WBGene00003758	0.273	-0.281	0.336	0.554	-0.062	-0.617				up		down
Q95005	pas-4	Proteasome subunit alpha type-7	WBGene00003925	-0.139	0.087	-0.047	-0.226	-0.091	0.134				down
O45137	bas-1	Biogenic Amine Synthesis related	WBGene00000239	-0.242	-0.027	-0.034	-0.215	-0.208	0.007	down			down	down
Q20520	pepm-1	PEPtidase M1 domain containing	WBGene00009807	0.752	-0.238	-0.077	0.991	0.83	-0.161	up			up	up
G4SP89	CELE_Y48A5A.3	Uncharacterized protein	WBGene00044466	-0.296	0.107	-0.208	-0.404	-0.089	0.315	down			down		up
Q21750	aagr-2	P-type domain-containing protein	WBGene00019895	-0.654	-0.333	-0.46	-0.321	-0.194	0.127	down	down	down	down
Q10667	rnp-1	RNA-binding protein rnp-1	WBGene00004384	0.408	-0.248	0.052	0.656	0.356	-0.3				up
Q09261	mrps-31	28S ribosomal protein S31, mitochondrial	WBGene00007859	0.304	0.074	0.012	0.23	0.292	0.062	up			up	up
Q2HQK3	CELE_Y62E10A.20	Uncharacterized protein	WBGene00044745	-0.28	0.136	-0.018	-0.416	-0.262	0.154	down			down	down
G5EE80	SRP54	Signal recognition particle 54 kDa protein	WBGene00009012	-0.129	0.084	0.03	-0.213	-0.158	0.054				down	down
Q9XVP0	rps-15	40S ribosomal protein S15	WBGene00004484	0.107	-0.091	-0.069	0.198	0.176	-0.022				up	up
U4PMA7	plst-1	PLaSTin (Actin bundling protein) homolog	WBGene00022425	-0.129	0.054	0.115	-0.183	-0.244	-0.061	down			down	down
H2KYV3	C18B2.5	Uncharacterized protein	WBGene00015956	-0.322	-0.07	-0.034	-0.252	-0.288	-0.036	down			down	down
P46558	ckb-1	Choline kinase B1	WBGene00000511	-0.361	0.137	0.011	-0.498	-0.372	0.126	down			down	down
P34643	sec-16A.1	Protein transport protein sec-16A.1	WBGene00013985	-0.207	0.165	0.14	-0.373	-0.347	0.026				down	down
P61866	rpl-12	60S ribosomal protein L12	WBGene00004424	-0.334	0.137	-0.096	-0.47	-0.238	0.232	down			down
Q6A1T5	CELE_F10G8.9	Beta-ketoacyl-[acyl-carrier-protein] synthase I	WBGene00008667	-0.528	-0.075	-0.319	-0.452	-0.209	0.244	down			down
Q65ZJ7	C32D5.8	Thioredoxin domain-containing protein	WBGene00016316	0.341	-0.109	0.15	0.451	0.191	-0.259	up			up
Q22706	sec-5	Exocyst complex component 2	WBGene00004752	-0.437	-0.071	-0.025	-0.366	-0.412	-0.046	down			down	down
D6RYD3	CELE_Y58A7A.1	Copper transport protein	WBGene00021975	-0.645	-0.296	-0.458	-0.349	-0.187	0.162	down	down	down	down
H2KZJ7	praf-3	PRA1 family protein	WBGene00017070	0.053	-0.208	-0.031	0.261	0.084	-0.177				up
Q20977	sta-2	Signal transducer and activator of transcription b	WBGene00010251	-0.188	0.19	0.058	-0.378	-0.247	0.131				down	down
Q17574	mtrr-1	Methionine synthase reductase	WBGene00006510	-0.33	0.041	-0.295	-0.37	-0.035	0.336	down		down	down		up
Q9N371	immp-2	Mitochondrial inner membrane protease subunit 2	WBGene00021925	-0.315	0.203	0.037	-0.519	-0.352	0.166				down	down
Q9XXE9	CELE_Y43C5A.2	Fibrinogen C-terminal domain-containing protein	WBGene00012782	-0.506	0.087	-0.108	-0.593	-0.398	0.195	down			down	down
Q1ZXU7	CELE_F13H10.8	Uncharacterized protein	WBGene00044784	0.008	-0.431	-0.212	0.439	0.221	-0.219		down		up
C6KRN3	CELE_W02D9.2	Protein YIPF	WBGene00012208	-0.445	0.194	-0.086	-0.639	-0.359	0.28	down			down
Q9N4L6	CELE_ZK973.11	Thioredoxin domain-containing protein	WBGene00022836	-0.339	0.045	-0.019	-0.384	-0.32	0.064	down			down	down
Q19989	golg-2	GOLGA2L5 domain-containing protein	WBGene00018017	-0.375	0.082	-0.033	-0.457	-0.342	0.115	down			down	down
Q95R11	CELE_F28B3.10	Uncharacterized protein	WBGene00017889	-0.153	0.22	-0.031	-0.373	-0.122	0.251				down
Q23459	CELE_ZK287.7	Uncharacterized protein	WBGene00013967	0.572	-0.014	-0.295	0.586	0.866	0.28	up			up	up
O02153	grd-14	GRounDhog (Hedgehog-like family)	WBGene00001703	0.213	0.514	0.492	-0.301	-0.279	0.022	up	up	up	down	down
Q22235	enpl-1	Endoplasmin homolog	WBGene00011480	-0.086	0.138	0.017	-0.224	-0.103	0.12				down
O45089	faah-3	Amidase domain-containing protein	WBGene00019068	-0.247	0.045	0.217	-0.292	-0.464	-0.172	down			down	down
Q22716	rpl-32	60S ribosomal protein L32	WBGene00004446	-0.235	0.245	0.073	-0.48	-0.308	0.172				down	down
Q20898	ifet-1	Translational repressor ifet-1	WBGene00004132	0.314	0.001	0.178	0.314	0.136	-0.178	up			up
O62102	pbs-2	Proteasome subunit beta	WBGene00003948	-0.079	0.215	0.005	-0.294	-0.084	0.21				down
Q20100	trpp-4	Trafficking protein particle complex subunit	WBGene00018088	-0.213	0.068	0.082	-0.281	-0.295	-0.014	down			down	down
Q21706	ugt-47	Putative UDP-glucuronosyltransferase ugt-47	WBGene00011006	-0.107	0.142	0.068	-0.25	-0.175	0.074				down	down
C0Z1Y7	sec-20	Yeast SEC homolog	WBGene00018239	1.115	-0.411	-0.177	1.526	1.292	-0.235	up			up	up
Q09605	lec-7	Probable galaptin lec-7	WBGene00002270	0.797	0.008	-0.205	0.79	1.002	0.212	up			up	up
P91989	CELE_F25H9.7	Succinate dehydrogenase assembly factor 3	WBGene00009139	-0.257	0.119	-0.438	-0.376	0.181	0.556	down		down	down		up
Q9XUH3	dod-24	CUB_2 domain-containing protein	WBGene00007875	0.208	0.932	-0.317	-0.724	0.525	1.249		up		down	up	up
A0A2K5ATV1	CELE_R10E9.4	Uncharacterized protein	WBGene00303072	-0.368	0.332	-0.399	-0.7	0.031	0.731				down		up
Q4W5Q8	adpr-1	WD_REPEATS_REGION domain-containing protein	WBGene00044440	-0.219	0.227	0.078	-0.446	-0.297	0.149				down	down
Q9XWR7	CELE_Y11D7A.3	Uncharacterized protein	WBGene00012428	-0.281	0.591	0.034	-0.872	-0.315	0.557				down
P34345	gsto-1	Glutathione transferase omega-1	WBGene00016204	-0.995	-0.279	-0.93	-0.716	-0.065	0.651	down		down	down		up
O16887	C29G2.6	Uncharacterized protein C29G2.6	WBGene00016234	0.68	0.254	0.098	0.426	0.583	0.156	up			up	up
P55163	gex-3	Membrane-associated protein gex-3	WBGene00001580	-0.424	-0.055	0.014	-0.369	-0.438	-0.07	down			down	down
Q19440	hxk-1	Phosphotransferase	WBGene00008780	-0.922	-0.101	-0.379	-0.821	-0.543	0.278	down			down	down
Q8I136	gly-4	Polypeptide N-acetylgalactosaminyltransferase 4	WBGene00001629	-0.206	-0.008	0.163	-0.198	-0.369	-0.171	down		up	down	down	down
A0A2K5AU23	rga-8	Rho-GAP domain-containing protein	WBGene00021324	-0.377	0.072	0.118	-0.448	-0.495	-0.047	down			down	down
Q9GPA0	uggt-1	UDP-Glucose Glycoprotein glucosylTransferase	WBGene00018604	-0.305	-0.149	-0.113	-0.156	-0.192	-0.037	down	down		down	down
Q9XWL1	ttr-17	TransThyretin-Related family domain	WBGene00012383	0.449	0.161	0.146	0.287	0.303	0.015	up			up	up
Q8IG32	CELE_F09E5.16	Uncharacterized protein	WBGene00017292	-0.141	0.612	0.032	-0.753	-0.173	0.579				down		up
Q18677	dhp-2	Dihydropyrimidinase 2	WBGene00000964	0.439	0.191	0.219	0.248	0.22	-0.028	up		up	up	up
D7SFI3	C02D5.4	Glutathione S-transferase omega	WBGene00043097	-0.057	0.203	-0.154	-0.259	0.097	0.357				down		up
O62277	dct-18	DAF-16/FOXO Controlled, germline Tumor affecting	WBGene00010266	0.241	0.005	-0.249	0.237	0.49	0.254	up		down	up	up	up
P91859	maph-1.1	Microtubule-associated protein homolog maph-1.1	WBGene00009306	0.115	-0.033	0.023	0.148	0.093	-0.055	up			up
P24893	ctc-1	Cytochrome c oxidase subunit 1	WBGene00010964	-0.146	0.456	0.256	-0.603	-0.402	0.201				down	down
P47208	cct-4	T-complex protein 1 subunit delta	WBGene00000379	0.188	0.009	0.076	0.179	0.112	-0.067	up			up
O44145	perm-2	PERMeable eggshell	WBGene00016636	-1.191	-0.09	-0.547	-1.101	-0.644	0.457	down			down
W6RTE4	ntl-4	NOT-Like (Yeast CCR4/NOT complex component)	WBGene00003827	-0.428	-0.018	-0.039	-0.41	-0.389	0.021	down			down	down
Q09551	asah-2	Probable acid ceramidase	WBGene00009192	-0.707	-0.295	-0.2	-0.413	-0.507	-0.094	down			down	down
G5EG62	unc-45	TPR_REGION domain-containing protein	WBGene00006781	0.225	0.021	0.069	0.204	0.156	-0.048	up			up	up
G5EES9	txl-1	ThioredoXin-Like	WBGene00021826	-0.131	0.291	0.142	-0.422	-0.273	0.149				down	down
O61929	CELE_T06A1.5	Glycosyltransferase family 92 protein	WBGene00020280	-0.251	0.254	0.141	-0.505	-0.392	0.113				down	down
Q22715	CELE_T24B8.4	Uncharacterized protein	WBGene00011978	-0.439	0.114	0.428	-0.553	-0.867	-0.314	down			down	down
Q09214	B0495.5	Uncharacterized protein B0495.5	WBGene00015204	-0.302	-0.036	-0.158	-0.266	-0.144	0.123	down			down
Q9NAF9	pinn-4	Peptidyl-prolyl cis-trans isomerase	WBGene00012996	0.296	-0.087	-0.067	0.383	0.363	-0.02	up			up	up
Q21774	adsl-1	Adenylosuccinate lyase	WBGene00011064	-0.099	0.121	-0.142	-0.22	0.043	0.263				down		up
Q23330	CELE_ZC449.5	Uncharacterized protein	WBGene00022615	-0.08	0.317	0.242	-0.397	-0.322	0.074				down	down
Q9N492	pinn-1	Peptidyl-prolyl cis-trans isomerase	WBGene00022448	-0.194	0.254	-0.001	-0.448	-0.193	0.255				down
P35603	dpy-23	AP-2 complex subunit mu	WBGene00001082	-0.008	-0.229	-0.023	0.221	0.015	-0.206		down		up		down
Q18969	rab-39	RAB family	WBGene00004286	-0.186	0.196	-0.028	-0.382	-0.158	0.224				down
Q9XUD8	CELE_F55G11.2	CUB_2 domain-containing protein	WBGene00010123	-0.045	0.58	0.301	-0.625	-0.346	0.279		up		down
Q2XN18	spp-14	Saposin B-type domain-containing protein	WBGene00004999	-0.921	-0.232	-0.564	-0.689	-0.357	0.333	down		down	down
Q21151	CELE_K02F3.9	Uncharacterized protein	WBGene00019332	-0.204	0.017	0.181	-0.221	-0.385	-0.164	down		up	down	down
O17735	CELE_D2023.6	ABC1 domain-containing protein	WBGene00008410	-0.474	-0.191	-0.552	-0.283	0.078	0.362	down		down	down		up
Q20375	sptl-2	Serine palmitoyltransferase 2	WBGene00018398	-0.395	-0.085	-0.096	-0.311	-0.299	0.012	down			down	down
Q19437	upb-1	CN hydrolase domain-containing protein	WBGene00017440	0.248	0.038	0.009	0.21	0.239	0.029	up			up	up
Q8WTL6	hpo-29	Uncharacterized protein	WBGene00021754	-0.121	0.138	0.017	-0.259	-0.138	0.12				down
O44995	CELE_K12C11.1	AMP_N domain-containing protein	WBGene00019673	-0.307	-0.181	-0.238	-0.126	-0.069	0.057	down	down	down	down
Q27245	lap-2	Putative aminopeptidase W07G4.4	WBGene00002250	-0.246	0.392	-0.012	-0.638	-0.234	0.404				down
Q21601	mrps-34	Mitochondrial Ribosomal Protein, Small	WBGene00010905	0.351	0.061	1.054	0.29	-0.703	-0.993	up		up	up	down	down
Q6BES8	CELE_F53F4.16	Uncharacterized protein	WBGene00023419	0.107	-0.162	-0.047	0.269	0.154	-0.115				up
P91309	F46F11.1	Inositol hexakisphosphate and diphosphoinositol-pentakisphosphate kinase	WBGene00018508	-0.325	-0.006	-0.104	-0.318	-0.22	0.098	down			down	down
Q19000	gbh-1	Probable gamma-butyrobetaine dioxygenase	WBGene00001522	-0.515	-0.077	-0.151	-0.438	-0.364	0.074	down			down	down
Q9XWE6	Y106G6E.4	Probable 5-formyltetrahydrofolate cyclo-ligase	WBGene00013708	-0.353	0.097	-0.293	-0.45	-0.059	0.391	down			down		up
Q95XD0	exos-2	Ribosomal RNA-processing protein 4	WBGene00022232	0.682	0.123	-0.025	0.559	0.707	0.148	up			up	up
Q23206	CELE_W06E11.1	Uncharacterized protein	WBGene00021061	1.014	0.206	0.212	0.808	0.802	-0.005	up			up	up
H2L0I6	CELE_Y67D8A.2	Phosphorylase b kinase regulatory subunit	WBGene00022059	-0.38	-0.034	-0.003	-0.347	-0.377	-0.031	down			down	down
Q18852	C54G4.7	Uncharacterized protein	WBGene00008317	-0.474	0.016	-0.227	-0.49	-0.247	0.243	down			down
Q20049	idhg-1	Isocitrate dehydrogenase [NAD] subunit, mitochondrial	WBGene00009440	-0.201	-0.039	-0.088	-0.161	-0.112	0.049	down			down	down
G5EBW5	fecl-1	FErroChelatase-Like	WBGene00010645	-0.256	-0.081	-0.23	-0.176	-0.026	0.149	down		down	down		up
O62508	scl-20	SCP domain-containing protein	WBGene00013972	-0.676	0.706	1.777	-1.382	-2.454	-1.072			up	down	down
Q9XU15	hxk-2	Phosphotransferase	WBGene00010416	-0.243	0.017	-0.008	-0.26	-0.235	0.025	down			down	down
Q9TZ26	fbxa-60	F-box domain-containing protein	WBGene00020456	-0.312	0.196	0.287	-0.508	-0.598	-0.09				down	down
Q23338	fkb-4	Peptidylprolyl isomerase	WBGene00001429	0.76	0.415	0.091	0.346	0.669	0.323	up	up		up	up	up
A0A0K3AQM0	lim-9	LIM domain family	WBGene00006407	-0.144	0.237	-0.025	-0.381	-0.119	0.262				down
Q22207	CELE_T05A7.1	Uncharacterized protein	WBGene00020219	0.025	0.496	0.296	-0.471	-0.27	0.2		up		down
Q5CZ37	fitm-2	Acyl-coenzyme A diphosphatase FITM2	WBGene00044094	-0.456	-0.002	-0.072	-0.455	-0.384	0.071	down			down	down
O01686	obr-4	Oxysterol-binding protein	WBGene00016331	-0.138	0.084	0.151	-0.222	-0.289	-0.067				down	down
O02637	cah-6	Carbonic anhydrase	WBGene00000284	-0.156	0.283	-0.024	-0.438	-0.132	0.306				down
A9CZN9	CELE_E01A2.1	GCS light chain	WBGene00017084	-0.198	0.117	-0.05	-0.315	-0.148	0.168				down
P91478	mrrf-1	Ribosome-recycling factor, mitochondrial	WBGene00020625	-0.134	0.15	-0.118	-0.283	-0.016	0.267				down		up
Q18610	abhd-3.2	Protein abhd-3.2	WBGene00016644	0.396	-0.191	0.091	0.587	0.305	-0.282	up			up
Q09504	C45G9.2	Uncharacterized tRNA-dihydrouridine synthase-like protein C45G9.2	WBGene00016674	0.477	-0.673	-0.416	1.15	0.892	-0.258				up	up
G5EDV3	cey-4	CSD domain-containing protein	WBGene00000475	0.038	-0.177	0.066	0.216	-0.027	-0.243				up		down
O17761	ech-8	Enoyl-CoA Hydratase	WBGene00001157	-0.29	-0.059	0.08	-0.231	-0.37	-0.139	down			down	down
Q9U1Q7	emb-4	AAA_12 domain-containing protein	WBGene00001258	-0.052	0.183	0.148	-0.235	-0.2	0.035				down	down
Q10003	gpcp-2	Putative glycerophosphocholine phosphodiesterase GPCPD1 homolog 2	WBGene00011511	-0.436	0.002	0.151	-0.438	-0.588	-0.149	down			down	down
O16202	lys-7	Lysozyme-like protein 7	WBGene00003096	0.193	0.886	0.75	-0.693	-0.557	0.136		up	up	down	down
Q20287	CELE_F41G3.6	Uncharacterized protein	WBGene00018302	-0.324	0.084	-0.031	-0.409	-0.294	0.115	down			down	down
Q9TZM3	lrk-1	Leucine-rich repeat serine/threonine-protein kinase 1	WBGene00003068	0.806	-0.144	-0.023	0.95	0.83	-0.12	up			up	up
Q95XX1	nprt-1	Nicotinate phosphoribosyltransferase	WBGene00021882	-0.979	-0.755	-0.464	-0.224	-0.515	-0.29	down	down	down	down	down	down
Q18143	cht-3	Chitinase-like protein C25A8.4	WBGene00016084	-1.709	-1.185	-0.932	-0.524	-0.778	-0.254	down	down	down	down	down
A0A061AD72	kdin-1	ANK_REP_REGION domain-containing protein	WBGene00006490	-0.212	-0.022	0.075	-0.19	-0.288	-0.097	down			down	down
Q09610	lec-8	Probable galaptin lec-8	WBGene00002271	-0.248	0.274	0.127	-0.522	-0.375	0.148				down	down
Q9NAH3	teg-1	Tumorous Enhancer of Glp-1(Gf)	WBGene00006563	0.69	-0.001	0.258	0.691	0.432	-0.259	up			up
Q17559	cpna-3	VWFA domain-containing protein	WBGene00007221	-0.437	0.146	0.224	-0.583	-0.66	-0.077	down			down	down
P34335	C14B9.8	Probable phosphorylase b kinase regulatory subunit alpha	WBGene00015754	-0.344	-0.012	0.04	-0.331	-0.384	-0.052	down			down	down
Q21463	asns-2	Asparagine synthetase [glutamine-hydrolyzing]	WBGene00019730	-0.336	0.226	0.771	-0.562	-1.108	-0.546			up	down	down	down
Q95Q18	Y53F4B.39	Beta-lactamase-like protein 2 homolog	WBGene00013176	-0.214	-0.035	-0.123	-0.18	-0.091	0.088	down			down
G5EBV4	lec-10	Galectin	WBGene00002273	-0.293	0.24	-0.012	-0.533	-0.281	0.252				down
O17069	CELE_F23F1.6	AA_permease_C domain-containing protein	WBGene00017747	-1.377	-0.595	-0.302	-0.781	-1.075	-0.294	down			down	down
Q9U332	rpl-31	60S ribosomal protein L31	WBGene00004445	0.23	-0.056	-0.009	0.287	0.239	-0.048	up			up	up
Q20716	isy-1	Protein isy-1	WBGene00009966	-0.124	0.371	0.064	-0.495	-0.188	0.307				down
Q8MQ99	C51E3.9	Uncharacterized protein	WBGene00008254	-0.188	0.102	-0.108	-0.29	-0.079	0.211				down
O44501	fnta-1	FarNesylTransferase, Alpha subunit	WBGene00019823	-0.098	0.145	0.043	-0.243	-0.141	0.103				down
Q10462	cah-5	Putative carbonic anhydrase 5	WBGene00000283	-0.24	0.027	0.142	-0.267	-0.382	-0.116	down			down	down
Q4W5T0	mrpl-39	Mitochondrial Ribosomal Protein, Large	WBGene00044344	0.255	-0.171	-0.454	0.425	0.709	0.284			down	up	up
P18835	col-19	Cuticle collagen 19	WBGene00000608	0.958	0.029	-0.304	0.929	1.262	0.333	up			up	up
Q9N4F1	CELE_Y71H2B.5	Uncharacterized protein	WBGene00022195	0.385	0.055	0.051	0.33	0.335	0.004	up			up	up
Q22712	mtm-3	Myotubularin-related protein 3	WBGene00003476	-0.485	0.489	0.344	-0.973	-0.829	0.144				down	down
O45435	best-13	Bestrophin homolog 13	WBGene00009323	0.833	0.134	-0.017	0.699	0.85	0.151	up			up	up
Q20059	wdr-48	WD repeat-containing protein 48 homolog	WBGene00009441	-0.047	-0.936	0.044	0.889	-0.091	-0.98		down		up		down
H2KYR1	vig-1	HABP4_PAI-RBP1 domain-containing protein	WBGene00006924	0.388	0.145	-0.079	0.243	0.467	0.224	up			up	up	up
Q20432	cnep-1	CTD nuclear envelope phosphatase 1 homolog	WBGene00018474	-0.332	0.074	-0.124	-0.405	-0.208	0.197	down			down
P0CG71;P49632	ubq-1	Polyubiquitin-A;Ubiquitin-60S ribosomal protein L40	WBGene00006727	-0.262	0.124	-0.119	-0.386	-0.143	0.243	down			down
Q21038	ver-3	Tyrosine-protein kinase receptor ver-3	WBGene00006896	-0.411	-0.103	0.02	-0.309	-0.431	-0.122	down			down	down
P30628	unc-32	V-type proton ATPase 116 kDa subunit a 1	WBGene00006768	-0.238	-0.019	-0.02	-0.219	-0.218	0.002	down			down	down
Q20758	arl-1	ADP-ribosylation factor-like protein 1	WBGene00000187	-0.297	0.228	0.002	-0.525	-0.299	0.226				down
Q967F4	hmr-1	Cadherin-related hmr-1	WBGene00001980	-0.367	0.03	-0.034	-0.397	-0.333	0.064	down			down	down
A0A1N7SYZ4	C26G2.2	Uncharacterized protein	WBGene00007751	-0.191	0.755	0.604	-0.946	-0.795	0.151				down	down
Q9XVK6	wve-1	Wiskott-Aldrich syndrome protein family member	WBGene00006958	-0.806	-0.087	0.214	-0.718	-1.02	-0.302	down			down	down
P34748	mrps-23	Probable 28S ribosomal protein S23, mitochondrial	WBGene00014224	0.251	-0.137	0.147	0.388	0.105	-0.284				up
A5Z2U7	CELE_F17B5.8	Uncharacterized protein	WBGene00045458	-0.106	0.281	0.104	-0.387	-0.21	0.176				down
O44159	mrpl-48	Ribosomal_S10 domain-containing protein	WBGene00016989	0.327	0.022	-0.373	0.305	0.7	0.395	up		down	up	up	up
P29355	sem-5	Sex muscle abnormal protein 5	WBGene00004774	-0.285	0.024	0.116	-0.31	-0.401	-0.091	down			down	down
O45298	atgp-2	Aamy domain-containing protein	WBGene00000225	-0.235	0.047	0.078	-0.283	-0.313	-0.03	down			down	down
Q9XV52	gfm-1	Elongation factor G, mitochondrial	WBGene00009246	0.119	-0.083	-0.568	0.202	0.687	0.485			down	up	up	up
G5EGJ5	ida-1	Receptor-type tyrosine-protein phosphatase-like ida-1	WBGene00002048	-0.388	0.082	0.07	-0.469	-0.458	0.012	down			down	down
Q3Y400	glrx-22	Glutaredoxin domain-containing protein	WBGene00044608	-0.189	0.095	0.055	-0.285	-0.244	0.04				down	down
Q20877	CELE_F56D3.1	Uncharacterized protein	WBGene00018969	0.051	0.383	0.115	-0.332	-0.064	0.268		up		down		up
G5EBX6	crn-3	Cell death-related nuclease 3	WBGene00000796	0.72	0.087	-0.142	0.633	0.862	0.229	up			up	up
Q20521	CELE_F47B8.8	Peptidase_M1_N domain-containing protein	WBGene00009809	0.1	-0.141	-0.026	0.241	0.125	-0.115				up
Q9XWU8	epg-3	Ectopic P granules protein 3	WBGene00012559	-0.259	0.149	-0.132	-0.408	-0.127	0.281				down
Q9NAH6	rsks-1	Ribosomal protein S6 kinase beta	WBGene00012929	0.188	0.029	-0.027	0.159	0.216	0.057	up			up	up
Q965V4	xpo-2	Exportin-2	WBGene00002079	-0.053	0.25	0.108	-0.303	-0.161	0.142				down
Q9TYW1	vha-19	V-type proton ATPase subunit S1	WBGene00021952	-0.23	-0.054	-0.025	-0.176	-0.204	-0.028	down			down	down
Q9N412	CELE_Y39A3CL.1	Uncharacterized protein	WBGene00021440	-0.245	0.031	-0.03	-0.276	-0.214	0.062	down			down	down
G5ED17	hpo-11	Protein kinase domain-containing protein	WBGene00010427	-0.324	0.089	-0.112	-0.413	-0.212	0.201	down			down
Q20220	CELE_F40F4.7	N-acetyltransferase domain-containing protein	WBGene00018238	-0.006	0.254	0.401	-0.259	-0.407	-0.147		up	up	down	down
Q9XWS6	CELE_Y62H9A.5	Uncharacterized protein	WBGene00013393	-1.695	-0.911	-0.724	-0.784	-0.971	-0.187	down	down	down	down	down
Q22438	mrpl-51	39S ribosomal protein L51, mitochondrial	WBGene00011740	0.169	-0.132	-0.42	0.302	0.589	0.287			down	up	up	up
H2KYZ8	CELE_F55A12.2	Uncharacterized protein	WBGene00018863	0.712	-0.128	0.021	0.839	0.691	-0.148	up			up	up
Q8WQF3	smg-4	Smg4_UPF3 domain-containing protein	WBGene00004882	-0.409	0.265	0.227	-0.675	-0.637	0.038				down	down
Q9XWS4	rpl-30	60S ribosomal protein L30	WBGene00004444	-0.236	0.528	0.038	-0.765	-0.274	0.49				down
Q9XTT3	scav-3	SCAVenger receptor (CD36 family) related	WBGene00013039	0.18	-0.043	-0.013	0.223	0.192	-0.031	up			up	up
Q22531	T16G12.1	Putative aminopeptidase-2	WBGene00011803	-0.253	0.029	0.05	-0.282	-0.303	-0.021	down			down	down
P49595	ppm-1.G	Protein phosphatase ppm-1.G	WBGene00018362	-0.185	0.248	-0.087	-0.433	-0.099	0.335				down
G5EF61	ndg-4	NRF domain-containing protein	WBGene00003577	-0.182	0.125	0.179	-0.307	-0.361	-0.053				down	down
Q9N5S8	acl-4	PlsC domain-containing protein	WBGene00018657	-0.426	-0.006	0.281	-0.42	-0.706	-0.286	down			down	down
O44895	CELE_ZK484.3	Uncharacterized protein	WBGene00022749	-0.26	0.232	0.252	-0.492	-0.512	-0.02				down	down
Q95ZR2	CELE_R05D11.9	Uncharacterized protein	WBGene00011037	-0.318	0.216	0.115	-0.534	-0.433	0.101				down	down
Q5ZEQ3	gpap-1	Golgi-resident PAp (PAP) 3-Phosphatase homolog	WBGene00012390	-0.408	0.046	0.141	-0.453	-0.548	-0.095	down			down	down
Q8MXR3	ipla-6	PNPLA domain-containing protein	WBGene00022233	-0.08	0.294	-0.09	-0.374	0.01	0.384				down		up
Q20798	sel-11	E3 ubiquitin-protein ligase hrd-1	WBGene00004768	-0.246	0.568	-0.131	-0.814	-0.115	0.699				down		up
G5EDK1	trip-4	ASC-1	WBGene00000208	-0.188	0.239	0.033	-0.426	-0.22	0.206				down
Q18494	maph-1.3	Microtubule-Associated Protein Homolog	WBGene00007966	-0.235	0.236	-0.092	-0.471	-0.143	0.329				down
O61199	ogdh-1	2-oxoglutarate dehydrogenase, mitochondrial	WBGene00020679	-0.132	-0.03	-0.066	-0.102	-0.066	0.035	down			down
Q9U3J2	tag-280	Uncharacterized protein	WBGene00044322	0.053	-0.461	-0.212	0.514	0.265	-0.248		down		up
Q93830	exos-3	Ribosomal RNA-processing protein 40	WBGene00010325	1.15	0.358	0.12	0.791	1.029	0.238	up			up	up
O45168	ifc-1	Intermediate filament protein ifc-1	WBGene00002055	-0.042	0.39	0.115	-0.432	-0.157	0.275		up		down
Q19694	ttr-35	TransThyretin-Related family domain	WBGene00017688	-0.486	0.013	0.438	-0.499	-0.924	-0.425	down		up	down	down	down
Q966C7	tald-1	Transaldolase	WBGene00021286	-0.201	-0.078	-0.208	-0.122	0.007	0.129	down		down	down		up
Q965Q1	CELE_Y22D7AL.10	10 kDa heat shock protein, mitochondrial	WBGene00021248	-0.145	0.287	-0.56	-0.432	0.415	0.847			down	down	up	up
H2KYE2	CELE_F26F12.3	Uncharacterized protein	WBGene00017834	-0.362	0.052	0.044	-0.415	-0.406	0.009	down			down	down
Q9N3F3	mrpl-17	39S ribosomal protein L17, mitochondrial	WBGene00021829	-0.064	0.507	-0.487	-0.571	0.423	0.993		up	down	down	up	up
H2KYJ5	mtch-1	MiTochondrial Carrier Homolog	WBGene00018395	-0.19	0.022	-0.075	-0.212	-0.115	0.097	down			down
Q09462	C16C10.2	Probable U3 small nucleolar RNA-associated protein 11	WBGene00007623	1.257	0.396	0.34	0.86	0.917	0.056	up			up	up
D5MCR3	sup-26	SUPpressor	WBGene00006331	-0.318	0.215	0.073	-0.533	-0.391	0.142				down	down
Q94177	paqr-1	Progestin and adipoQ receptor-like protein 1	WBGene00016610	-0.489	0.04	-0.292	-0.53	-0.198	0.332	down			down
A5JYZ2	CELE_M01E5.3	Uncharacterized protein	WBGene00010806	-0.602	0.286	0.091	-0.888	-0.693	0.195				down	down
Q18476	C35A5.8	Uncharacterized protein	WBGene00007952	-0.096	0.173	0.033	-0.269	-0.129	0.14				down
Q9XVV9	CELE_R03G8.6	Aminopeptidase	WBGene00011000	-1.322	-0.538	-0.648	-0.784	-0.673	0.111	down		down	down	down
Q9N425	csn-3	COP9 signalosome complex subunit 3	WBGene00000815	-0.284	0.07	0.003	-0.354	-0.287	0.067	down			down	down
Q9XW01	CELE_Y54G11A.7	Tetratricopeptide repeat protein 38	WBGene00013216	-0.645	-0.401	-0.685	-0.244	0.04	0.284	down	down	down	down		up
Q9XW13	mxt-1	Eukaryotic translation initiation factor 4E-binding protein Mextli homolog	WBGene00012478	-0.322	0.209	0.189	-0.532	-0.512	0.02				down	down
Q94128	wrt-1	Warthog protein 1	WBGene00006947	-0.119	0.575	0.444	-0.694	-0.562	0.131				down	down
Q9GR61	rpb-10	DNA-directed RNA polymerases I, II, and III subunit RPABC5	WBGene00021347	0.673	0.219	0.153	0.454	0.52	0.067	up			up	up
P90889	CELE_F55H12.4	Uncharacterized protein	WBGene00010135	0.667	-0.141	0.364	0.808	0.304	-0.504	up			up
Q3V5H6	CELE_ZK185.5	ZT_dimer domain-containing protein	WBGene00044481	-0.138	0.189	0.173	-0.327	-0.311	0.016				down	down
O16614	B0281.3	RING-type domain-containing protein	WBGene00015110	-0.189	0.324	0.343	-0.513	-0.533	-0.019				down	down
Q9XXI8	CELE_Y17G7B.8	F-box domain-containing protein	WBGene00012462	-0.271	0.168	-0.011	-0.439	-0.26	0.179				down
Q17439	B0035.15	Uncharacterized protein B0035.15	WBGene00007113	-0.352	0.133	-0.495	-0.485	0.143	0.628	down		down	down		up
Q27GQ6	CELE_F49C12.7	CHK domain-containing protein	WBGene00009877	-0.454	0.15	0.813	-0.604	-1.267	-0.663	down		up	down	down	down
Q22171	CELE_T04G9.4	L-aminoadipate-semialdehyde dehydrogenase-phosphopantetheinyl transferase	WBGene00020215	-0.187	0.043	0.203	-0.229	-0.389	-0.16	down		up	down	down
P91079	sptl-1	Serine palmitoyltransferase 1	WBGene00016020	-0.185	-0.04	-0.217	-0.145	0.033	0.177	down		down	down		up
Q9U308	jac-1	Juxtamembrane domain-associated catenin	WBGene00002175	-0.195	0.223	0.195	-0.418	-0.39	0.028				down	down
H2KYI5	adah-1	A_deaminase domain-containing protein	WBGene00015551	-0.164	0.098	0.283	-0.261	-0.446	-0.185			up	down	down
G5EG54	cpt-5	Carn_acyltransf domain-containing protein	WBGene00008629	0.272	-0.085	0.357	0.356	-0.085	-0.441	up		up	up		down
O45525	CELE_F45H10.2	Cytochrome b-c1 complex subunit 8	WBGene00009739	0.039	0.576	0.752	-0.537	-0.713	-0.176		up	up	down	down
O62103	prx-11	PeRoXisome assembly factor	WBGene00004196	-0.123	0.487	0.209	-0.611	-0.332	0.278				down
O17757	ugt-44	Glucuronosyltransferase	WBGene00008486	-0.821	-0.006	-0.181	-0.815	-0.64	0.175	down			down	down
A0A061ACQ8	CELE_Y92H12A.2	E3 ubiquitin-protein ligase	WBGene00022358	-0.296	0.246	0.019	-0.542	-0.315	0.227				down
Q20223	lbp-1	Fatty acid-binding protein homolog 1	WBGene00002253	-0.075	0.141	-0.01	-0.216	-0.064	0.151				down
G5EFS5;Q9N5T2	CELE_F45D11.15	Uncharacterized protein	WBGene00018460;WBGene00018461	0.797	1.353	1.601	-0.555	-0.804	-0.248	up	up	up	down	down
G5EEG8	frm-1	Moesin/ezrin/radixin homolog 1	WBGene00001488	-0.421	-0.193	-0.05	-0.228	-0.371	-0.143	down			down	down
Q09225	nrf-6	Nose resistant to fluoxetine protein 6	WBGene00003813	-0.395	-0.016	-0.023	-0.379	-0.371	0.007	down			down	down
Q9TXH9	ubxn-1	UBX domain-containing protein 1	WBGene00017733	-0.211	0.028	0.089	-0.239	-0.3	-0.06	down			down	down
G5ECM9	cpi-2	Cystatin cpi-2	WBGene00000534	-0.383	-0.09	0.03	-0.293	-0.413	-0.12	down			down	down
O62118	C53A5.13	Fibronectin type-III domain-containing protein	WBGene00008270	-0.14	0.471	0.025	-0.611	-0.164	0.447				down
H2KYX4	C23H3.2	Uncharacterized protein	WBGene00016018	0.003	0.185	0.024	-0.182	-0.021	0.161		up		down		up
Q20911	cubn-1	Cubilin homolog	WBGene00013855	-0.291	0.052	0.069	-0.343	-0.36	-0.017	down			down	down
Q9NA81	trpp-5	Trafficking protein particle complex subunit 5	WBGene00013259	-0.165	0.275	0.099	-0.44	-0.264	0.176				down
Q18122	C24A3.4	Uncharacterized protein	WBGene00016034	-0.41	-0.147	-0.212	-0.263	-0.198	0.065	down			down	down
Q23091	CELE_ZK742.4	Oxidored_FMN domain-containing protein	WBGene00022814	-0.098	0.15	0.044	-0.248	-0.142	0.106				down
O16637	apd-3	AP-3 complex subunit delta	WBGene00000162	-0.273	0.118	0.121	-0.391	-0.394	-0.003	down			down	down
Q9XU97	CELE_F44E5.1	Uncharacterized protein	WBGene00009688	-0.159	0.202	0.481	-0.361	-0.639	-0.278			up	down	down
K8ESK9	pod-1	Coronin-7	WBGene00004075	-0.211	-0.081	-0.029	-0.13	-0.182	-0.052	down			down	down
G5EF32	npa-1	Nematode Polyprotein Allergen related	WBGene00003786	-0.246	0.004	0.173	-0.25	-0.419	-0.169	down			down	down
P91272	CELE_F25F8.1	Uncharacterized protein	WBGene00017795	-0.415	0.133	0.119	-0.548	-0.534	0.013	down			down	down
Q18217	ula-1	NEDD8-activating enzyme E1 regulatory subunit	WBGene00006735	-0.096	0.103	0.008	-0.198	-0.104	0.094				down
Q23155	mrps-11	Mitochondrial Ribosomal Protein, Small	WBGene00012244	0.183	-0.237	0.872	0.421	-0.689	-1.109			up	up	down	down
O45074	CELE_F53H1.3	UDENN domain-containing protein	WBGene00018777	-0.387	0.111	0.215	-0.499	-0.602	-0.103	down			down	down
D9N147	CELE_K09G1.1	MARVEL domain-containing protein	WBGene00010727	-0.159	0.311	0.028	-0.47	-0.187	0.283				down
C8JQQ0	C25H3.17	Uncharacterized protein	WBGene00194642	0.415	-0.452	-0.241	0.867	0.656	-0.211				up	up
Q9BL83	vps-4	Vesicle-fusing ATPase	WBGene00021334	-0.158	0.066	-0.104	-0.224	-0.053	0.17	down			down
Q95X61	CELE_K11D12.11	BPTI/Kunitz inhibitor domain-containing protein	WBGene00019650	-0.529	0.297	0.212	-0.826	-0.741	0.085				down	down
Q19086	dpf-4	Acyl-peptide hydrolase	WBGene00001057	0.023	-0.088	-0.187	0.11	0.21	0.1			down	up	up	up
O44608	hacd-1	Hydroxy-Acyl-CoA Dehydrogenase	WBGene00019978	-0.544	0.002	0.402	-0.546	-0.946	-0.4	down			down	down
P91175	syf-1	SYF pre-mRNA splicing factor homolog	WBGene00016837	-0.031	0.245	0.13	-0.276	-0.161	0.115		up		down
O45258	pals-6	Protein containing ALS2cr12 (ALS2CR12) signature	WBGene00007660	0.003	0.514	0.338	-0.511	-0.335	0.176		up		down
C7GIK1	CELE_H06I04.6	CX domain-containing protein	WBGene00019170	-0.368	0.102	0.1	-0.47	-0.468	0.002	down			down	down
Q95XX0	ubc-13	Ubiquitin-conjugating enzyme E2 13	WBGene00006708	-0.035	0.262	0.122	-0.297	-0.157	0.14		up		down
G5EDH7	anat-1	AANAT (Arylalkylamine N-AcetylTransferase) homolog	WBGene00015938	-0.866	-0.116	-0.054	-0.749	-0.812	-0.063	down			down	down
Q9U2R3	CELE_Y15E3A.4	MFS domain-containing protein	WBGene00012443	0.048	0.368	0.117	-0.32	-0.07	0.25		up		down
O01426	B0207.6	GPN-loop GTPase 2	WBGene00015029	0.701	-0.274	-0.064	0.975	0.765	-0.21	up			up	up
Q9GZH4	ribo-1	Dolichyl-diphosphooligosaccharide--protein glycosyltransferase subunit 1	WBGene00020683	0.058	-0.072	-0.065	0.13	0.123	-0.007				up	up
G5EBR3	glc-1	Glutamate-gated chloride channel alpha	WBGene00001591	-0.325	0.323	0.118	-0.648	-0.443	0.205				down	down
H2L0C0	emc-1	ER membrane protein complex subunit 1	WBGene00019209	-0.227	0.008	-0.088	-0.234	-0.139	0.095	down			down
O45391	cth-1	Cystathionine gamma-lyase	WBGene00009048	-0.045	0.338	-0.274	-0.383	0.23	0.613		up		down		up
G5EDI1	C14H10.2	JAKMIP_CC3 domain-containing protein	WBGene00007592	-0.122	0.409	0.131	-0.531	-0.253	0.278				down
Q18587	mtpn-1	ANK_REP_REGION domain-containing protein	WBGene00016616	-0.328	0.775	0.51	-1.103	-0.838	0.265				down	down
Q21554	ddb-1	DNA damage-binding protein 1	WBGene00010890	-0.145	0.114	0.026	-0.259	-0.17	0.089				down
O62481	lact-9	Beta-lactamase domain-containing protein	WBGene00012890	-0.422	-0.144	-0.067	-0.278	-0.355	-0.077	down			down	down
O76383	hpo-15	Amino_oxidase domain-containing protein	WBGene00016061	-0.335	-0.002	0.153	-0.333	-0.487	-0.154	down			down	down
P17139	emb-9	Collagen alpha-1(IV) chain	WBGene00001263	-0.446	-0.07	-0.053	-0.376	-0.392	-0.016	down			down	down
Q19584	ufd-1	Ubiquitin fusion degradation protein 1 homolog	WBGene00006733	-0.375	0.037	0.032	-0.412	-0.407	0.005	down			down	down
Q9XU81	trpp-6	TRansport Protein Particle	WBGene00010699	-0.205	0.308	0.02	-0.513	-0.225	0.288				down
Q9XTQ8	suox-1	Sulfite oxidase	WBGene00010397	-0.287	-0.021	0.035	-0.266	-0.322	-0.056	down			down	down
Q9GRV9	pcp-4	Prolyl Carboxy Peptidase like	WBGene00003959	0.014	0.307	0.27	-0.293	-0.255	0.037		up	up	down	down
Q965T4	taco-1	Translational Activator of Cytochrome c Oxidase	WBGene00021757	0.262	0.004	-0.391	0.258	0.653	0.395	up		down	up	up	up
Q9TYY5	ugt-19	Glucuronosyltransferase	WBGene00019515	-0.653	-0.249	-1.204	-0.404	0.551	0.956	down		down	down	up	up
Q22037	hrp-1	Heterogeneous nuclear ribonucleoprotein A1	WBGene00001999	-0.115	0.299	0.218	-0.414	-0.333	0.081				down	down
A5HWA8	efl-2	Transcription factor efl-2	WBGene00001162	-2.567	-0.121	-0.441	-2.446	-2.126	0.32	down			down	down
Q22288	ttr-15	Transthyretin-like protein 15	WBGene00011561	-0.344	0.029	-0.143	-0.373	-0.201	0.172	down			down
A0A486WWU7	alh-4	Aldehyde dehydrogenase	WBGene00000110	-0.215	-0.071	0.037	-0.145	-0.252	-0.108	down			down	down
A0A486WVV5	C34F6.10	Uncharacterized protein	WBGene00007944	0.519	-0.287	0.182	0.806	0.337	-0.469				up
Q9N4K0	F54A3.5	MICOS complex subunit Mic10	WBGene00018784	-0.296	0.063	-0.128	-0.359	-0.168	0.192	down			down
Q19491	rsd-6	Tudor domain-containing protein	WBGene00004684	-0.109	0.32	0.181	-0.429	-0.29	0.139				down
P34461	sod-4	Extracellular superoxide dismutase [Cu-Zn]	WBGene00004933	-1.277	-0.593	-0.448	-0.684	-0.829	-0.144	down			down	down
Q19289	ifb-1	Intermediate filament protein ifb-1	WBGene00002053	0.142	0.001	-0.138	0.141	0.28	0.139	up		down	up	up	up
P34355	acox-1.5	Probable acyl-coenzyme A oxidase acox-1.5	WBGene00008167	-0.249	0.008	0.027	-0.257	-0.276	-0.019	down			down	down
P50305	sams-3	Probable S-adenosylmethionine synthase 3	WBGene00015538	0.007	-0.221	-0.076	0.229	0.083	-0.146		down		up
Q9U2C4	gly-9	Probable N-acetylgalactosaminyltransferase 9	WBGene00012934	-0.268	0.2	0.094	-0.467	-0.362	0.106				down	down
D5MCN2	larp-1	La-related protein 1	WBGene00020097	0.367	0.153	0.078	0.214	0.289	0.075	up			up	up
P90897	rde-12	DEAD-box ATP-dependent RNA helicase rde-12	WBGene00010280	0.351	0.191	0.198	0.16	0.152	-0.007	up	up	up	up	up
G5ECE3	lam-3	LAMinin related. See also lmb	WBGene00002248	-0.278	0.107	0.053	-0.385	-0.331	0.055	down			down	down
P90969	CELE_T23G11.7	Uncharacterized protein	WBGene00011972	-0.445	0.396	0.142	-0.841	-0.588	0.254				down	down
Q067X2	ule-2	Uterine Lumin Expressed/locailized	WBGene00045038	-2.515	-1.586	-1.316	-0.928	-1.199	-0.271	down	down	down	down	down
Q18864	sft-4	Surfeit locus protein 4 homolog	WBGene00004788	-0.304	-0.003	0.106	-0.3	-0.41	-0.11	down			down	down
P34623	ufbp-1	DDRGK domain-containing protein 1	WBGene00022865	0.084	-0.168	-0.036	0.252	0.12	-0.132				up
X5LPX5	pcyt-2.1	Ethanolamine-phosphate cytidylyltransferase	WBGene00021352	-0.319	-0.012	-0.02	-0.307	-0.299	0.008	down			down	down
Q93890	srf-3	UDP-galactose/UDP-N-acetylglucosamine transporter srf-3	WBGene00005153	-0.13	0.305	0.108	-0.435	-0.238	0.197				down
Q9N456	glrx-10	Glutaredoxin domain-containing protein	WBGene00021331	-0.139	0.388	-0.155	-0.527	0.016	0.543				down		up
G5EF77	sars-2	Serine--tRNA ligase	WBGene00005662	-0.271	0.018	-0.341	-0.289	0.07	0.359	down		down	down		up
K8ERV5	tnt-4	TropoNin T	WBGene00006589	-0.048	0.387	0.164	-0.435	-0.212	0.223				down
P54688	bcat-1	Branched-chain-amino-acid aminotransferase, cytosolic	WBGene00001149	-0.657	-0.367	-0.561	-0.29	-0.096	0.194	down	down	down	down
Q18888	aipr-1	Aryl hydrocarbon receptor Interacting Protein (AIP) Related	WBGene00016966	-0.327	0.065	-0.066	-0.391	-0.261	0.13	down			down
Q09285	akap-1	KH domain-containing protein akap-1	WBGene00016977	0.378	0.158	0.178	0.22	0.199	-0.02	up			up	up
Q18483	C35D10.6	Aldo_ket_red domain-containing protein	WBGene00016443	-0.18	0.059	-0.116	-0.239	-0.064	0.175	down			down
C1P627	dnj-16	J domain-containing protein	WBGene00001034	-0.074	0.098	0.057	-0.172	-0.13	0.041				down	down
G5EC75	clh-6	Chloride channel protein	WBGene00000533	-0.226	0.038	0.011	-0.265	-0.237	0.028	down			down	down
P06582	hsp-16.2	Heat shock protein hsp-16.2	WBGene00002016	1.071	0.259	-0.659	0.811	1.73	0.918	up			up	up	up
Q86FN3	ulp-3	ULP_PROTEASE domain-containing protein	WBGene00006738	-0.397	0.76	-0.14	-1.157	-0.256	0.901				down
O45830	ndx-1	Putative nudix hydrolase 1	WBGene00003578	-0.293	0.369	0.283	-0.662	-0.576	0.086				down	down
Q22254	CELE_T06D8.9	Store-operated calcium entry-associated regulatory factor	WBGene00011529	-0.326	0.285	0.064	-0.611	-0.39	0.221				down
P91040	mlst-8	Target of rapamycin complex subunit LST8	WBGene00015697	-0.796	0.036	-0.181	-0.832	-0.615	0.217	down			down	down
Q19537	rpa-1	Probable replication factor A 73 kDa subunit	WBGene00017546	-0.369	0.323	-0.049	-0.692	-0.32	0.372				down
P34274	C02C2.6	TIP41-like protein	WBGene00022803	-0.108	0.366	0.287	-0.474	-0.395	0.079				down	down
Q9GZF3	ckb-4	Choline Kinase B	WBGene00000514	-0.317	0.154	0.066	-0.471	-0.383	0.088				down	down
Q9XX18	mrpl-22	39S ribosomal protein L22, mitochondrial	WBGene00012645	0.146	-0.16	-0.378	0.306	0.524	0.218			down	up	up
O17641	col-178	Col_cuticle_N domain-containing protein	WBGene00000751	1.046	-0.036	-0.379	1.082	1.425	0.343	up			up	up
G5EFD7	CELE_F46C5.9	WD_REPEATS_REGION domain-containing protein	WBGene00009784	-0.255	0.026	0.041	-0.281	-0.295	-0.014	down			down	down
P34676	pcp-5	Prolyl carboxy peptidase like protein 5	WBGene00022801	-0.145	0.22	-0.085	-0.365	-0.06	0.305				down
Q19326	unc-85	Probable histone chaperone asf-1	WBGene00006817	-0.375	0.25	-0.053	-0.625	-0.322	0.303				down
Q9N359	csn-4	COP9 signalosome complex subunit 4	WBGene00000816	0.155	-0.025	-0.047	0.18	0.203	0.023	up			up	up
Q9NAP9	mrps-15	28S ribosomal protein S15, mitochondrial	WBGene00010624	0.453	0.123	1.019	0.33	-0.566	-0.896	up		up	up	down	down
Q18645	C45E5.1	Uncharacterized protein	WBGene00016664	-0.277	0	-0.117	-0.277	-0.16	0.117	down			down
Q20340	CELE_F42F12.4	Acireductone dioxygenase	WBGene00009636	-0.163	0.128	0.047	-0.291	-0.21	0.081				down	down
Q9GUM1	CELE_Y73E7A.1	Uncharacterized protein	WBGene00022268	0.048	-0.224	-0.022	0.271	0.07	-0.201				up
Q22137	CELE_T04A8.7	1,4-alpha-glucan branching enzyme	WBGene00011409	-0.171	-0.033	-0.087	-0.138	-0.084	0.054	down			down
U4PS08	zipt-15	Zrt (ZRT), Irt-(IRT-) like Protein Transporter	WBGene00021936	0.351	-0.274	-0.199	0.625	0.55	-0.074				up	up
Q20117	gcs-1	Glutamate--cysteine ligase	WBGene00001527	0.053	-0.174	-0.088	0.227	0.141	-0.086				up
Q9U213	rsr-2	Cwf21 domain-containing protein	WBGene00013260	0.748	-0.133	0.155	0.882	0.594	-0.288	up			up
Q9XVK5	ubc-12	NEDD8-conjugating enzyme ubc-12	WBGene00006707	0.26	-0.085	0.068	0.345	0.192	-0.153	up			up
P34358	ced-7	ABC transporter ced-7	WBGene00000421	-0.335	-0.041	0.039	-0.294	-0.374	-0.08	down			down	down
G5EDD4	tba-4	Tubulin alpha chain	WBGene00006530	-0.194	0.075	-0.025	-0.268	-0.169	0.1	down			down
Q9XTI0	B0250.5	Probable 3-hydroxyisobutyrate dehydrogenase, mitochondrial	WBGene00007122	-0.085	0.125	-0.075	-0.21	-0.01	0.2				down		up
P17343	gpb-1	Guanine nucleotide-binding protein subunit beta-1	WBGene00001679	-0.112	0.106	0.088	-0.218	-0.201	0.017				down	down
P91201	CELE_EGAP9.3	Uncharacterized protein	WBGene00017151	-0.078	0.443	0.481	-0.521	-0.559	-0.038			up	down	down
O02286	pck-2	Phosphoenolpyruvate carboxykinase (GTP)	WBGene00011232	0.296	0.116	0.018	0.18	0.278	0.098	up			up	up
P91268	pgal-1	Probable peptidyl-alpha-hydroxyglycine alpha-amidating lyase pgal-1	WBGene00017671	0.035	0.446	0.06	-0.411	-0.024	0.386		up		down		up
G4S3P8	str-176	MFS domain-containing protein	WBGene00006220	0.183	-0.128	0.013	0.311	0.17	-0.142				up
H2KYB8	grld-1	Glutamate Receptor Level Decreased	WBGene00017929	-0.17	0.187	0.072	-0.357	-0.242	0.115				down
Q23179	CELE_W05H9.1	Uncharacterized protein	WBGene00021048	-0.284	-0.039	0.253	-0.245	-0.536	-0.291	down		up	down	down	down
P24896	nduo-5	NADH-ubiquinone oxidoreductase chain 5	WBGene00010967	0.482	0.022	0.975	0.46	-0.493	-0.953	up		up	up	down	down
Q9N584	let-630	Uncharacterized protein	WBGene00002804	0.202	-0.003	0.069	0.206	0.134	-0.072	up			up
H2KZ53	skpo-3	ShKT domain-containing protein	WBGene00017968	0.354	0.541	0.328	-0.187	0.025	0.213	up	up	up	down		up
Q8MXS1	rab-18	Ras-related protein Rab-18	WBGene00004277	-0.064	0.248	0.082	-0.312	-0.146	0.166				down
Q9NB31	cst-1	Serine/threonine-protein kinase cst-1	WBGene00017472	-0.355	-0.093	-0.005	-0.262	-0.349	-0.087	down			down	down
O62250	F45G2.8	Mitochondrial import inner membrane translocase subunit tim-16	WBGene00009734	-0.166	0.175	-0.447	-0.341	0.281	0.622			down	down	up	up
Q19519	vps-36	Vacuolar protein-sorting-associated protein 36	WBGene00008919	-0.181	0.038	-0.02	-0.219	-0.161	0.058	down			down	down
Q9GSX9	ric-8	Synembryn	WBGene00004367	-0.299	-0.054	-0.007	-0.245	-0.292	-0.047	down			down	down
Q22647	scpl-4	Mitochondrial import inner membrane translocase subunit TIM50	WBGene00011897	-0.202	0.035	-0.303	-0.238	0.1	0.338	down		down	down		up
Q94421	ZK858.5	TM2 domain-containing protein ZK858.5	WBGene00014118	-0.324	0.435	0.257	-0.759	-0.58	0.178				down	down
Q23381	mmcm-1	Probable methylmalonyl-CoA mutase, mitochondrial	WBGene00014202	-0.072	0.08	-0.113	-0.152	0.04	0.192				down		up
Q10051	prp-19	Pre-mRNA-processing factor 19	WBGene00020423	-0.089	0.168	-0.035	-0.256	-0.053	0.203				down
Q09660	cyp-44A1	Probable cytochrome P450 CYP44	WBGene00000375	-0.305	-0.005	-0.037	-0.3	-0.268	0.032	down			down	down
Q9N4G9	snr-7	Probable small nuclear ribonucleoprotein G	WBGene00004920	-0.29	0.407	-0.053	-0.697	-0.237	0.46				down
[truncated: 3,068 more rows]
