# Supplementary material
Source: Research Square preprint supplement (doi:10.21203/rs.3.rs-9541370/v1)
Supplement: Supplementary file 5 [file 4e179311b7fc641ab96dce7a.xlsx]

## Sheet: N2 ncl-1 25C
Code	Genotype	Median Lifespan	Maximum Lifespan	Number of deaths	Censored	Number of worms	Comparison	p value (log-rank Mantel-Cox test)
A	N2	23	29	74	96	170	A vs B	<0.0001
B	ncl-1 (e1942)	15	36	72	93	165
Code	Genotype	Median Lifespan	Maximum Lifespan	Number of deaths	Censored	Number of worms	Comparison	p value (log-rank Mantel-Cox test)
A	N2	22	28	79	22	101	A vs B	<0.0001
B	ncl-1 (e1942)	14	21	103	14	117
Code	Genotype	Median Lifespan	Maximum Lifespan	Number of deaths	Censored	Number of worms	Comparison	p value (log-rank Mantel-Cox test)
A	N2	18	35	195	0	195	A vs B	<0.0001
B	ncl-1 (e1942)	18	25	151	0	151

## Sheet: glp-1 ncl-1 mrps-16 popl-1
Code	Genotype	Median Lifespan	Maximum Lifespan	Number of deaths	Censored	Number of worms	Comparison	p value (log-rank Mantel-Cox test)
A	glp-1 luci	31	54	110	17	127	A vs B	<0.0001
B	glp-1 ncl-1 luci	24	40	117	28	145
C	glp-1 ncl-1 mrps-16i	31	52	98	21	143	C vs B	<0.0001
D	glp-1 ncl-1 popl-1	31	46	110	33	119	D vs B	<0.0001
Code	Genotype	Median Lifespan	Maximum Lifespan	Number of deaths	Censored	Number of worms	Comparison	p value (log-rank Mantel-Cox test)
A	glp-1 luci	36		144	56	200	A vs B	<0.0001
B	glp-1 ncl-1 luci	20	33	174	16	190
C	glp-1 ncl-1 mrps-16i	25	42	179	16	260	C vs B	<0.0001
D	glp-1 ncl-1 popl-1	25	39	247	13	195	D vs B	<0.0001
Code	Genotype	Median Lifespan	Maximum Lifespan	Number of deaths	Censored	Number of worms	Comparison	p value (log-rank Mantel-Cox test)
A	glp-1 luci	33	40	50	75	125	A vs B	<0.0001
B	glp-1 ncl-1 luci	19	33	35	92	127
C	glp-1 ncl-1 mrps-16i	29	36	45	69	114	C vs B	0.0004
D	glp-1 ncl-1 popl-1	25	36	43	86	129	D vs B	0.0135
Code	Genotype	Median Lifespan	Maximum Lifespan	Number of deaths	Censored	Number of worms	Comparison	p value (log-rank Mantel-Cox test)
A	glp-1 luci	28	45	70	55	125	A vs B	<0.0001
B	glp-1 ncl-1 luci	25	37	60	40	100
C	glp-1 ncl-1 mrps-16i	25	45	88	37	125	C vs B	0.027151
D	glp-1 ncl-1 popl-1	30	45	84	41	125	D vs B	<0.0001
Code	Genotype	Median Lifespan	Maximum Lifespan	Number of deaths	Censored	Number of worms	Comparison	p value (log-rank Mantel-Cox test)
A	glp-1 luci	26	39	130	20	150	A vs B	<0.0001
B	glp-1 ncl-1 luci	23	34	109	41	150
C	glp-1 ncl-1 mrps-16i	26	39	94	56	150	C vs B	<0.0001
D	glp-1 ncl-1 popl-1	30	41	90	60	150	D vs B	0.0046

## Sheet: Double RNAi
Code	Genotype	Median Lifespan	Maximum Lifespan	Number of deaths	Censored	Number of worms	Comparison	p value (log-rank Mantel-Cox test)
A	glp-1 ncl-1 luci	26	46	137	38	175	A vs B	<0.0001
B	glp-1 luci	34	52	114	61	175
C	glp-1 mrps-16i/luci	31	57	138	37	175	A vs C	<0.0001
D	glp-1 popl-1i/luci	31	49	136	39	175	A vs D	<0.0001
E	glp-1 mrps-16i/popl-1i	31	54	137	28	165	C vs E	0.6575
							D vs E	0.6127
							A vs E	<0.0001
Code	Genotype	Median Lifespan	Maximum Lifespan	Number of deaths	Censored	Number of worms	Comparison	p value (log-rank Mantel-Cox test)
A	glp-1 luci	35	47	48	41	89	A vs B	<0.0001
B	glp-1 ncl-1 luci	25	35	117	31	148	B vs C	<0.0001
C	glp-1 ncl-1 mrps-16i/luci	26	47	79	35	114	C vs E	0.8133
D	glp-1 ncl-1 popl-1i/luci	27	45	94	41	135	B vs D	<0.0001
E	glp-1 ncl-1 mrps-16i/popl-1i	25	47	110	36	146	D vs E	0.1808
Code	Genotype	Median Lifespan	Maximum Lifespan	Number of deaths	Censored	Number of worms	Comparison	p value (log-rank Mantel-Cox test)
A	glp-1 luci	NA	NA	31	118	149
B	glp-1 ncl-1 luci	24	43	106	80	186	B vs C	0.0001
C	glp-1 ncl-1 mrps-16i/luci	28	43	79	80	159	C vs E	0.1428
D	glp-1 ncl-1 popl-1i/luci	31	46	70	65	135	B vs D	<0.0001
E	glp-1 ncl-1 mrps-16i/popl-1i	31	46	123	32	155	D vs E	0.0551

## Sheet: RNAse P MRP complex
Code	Genotype	Median Lifespan	Maximum Lifespan	Number of deaths	Censored	Number of worms	Comparison	p value (log-rank Mantel-Cox test)
A	glp-1 ncl-1 luci	20	34	88	32	120	A vs D	<0.0001
B	glp-1 ncl-1 popl-4	25	45	123	117	240	A vs B	<0.0001
C	glp-1 ncl-1 rpp-30	30	45	101	49	150	A vs C	<0.0001
D	glp-1 luci	25	37	85	60	145
Code	Genotype	Median Lifespan	Maximum Lifespan	Number of deaths	Censored	Number of worms	Comparison	p value (log-rank Mantel-Cox test)
A	glp-1 luci	26	39	130	20	150
B	glp-1 ncl-1 luci	23	34	109	41	150	A vs B	<0.0001
C	glp-1 ncl-1 popl-4	26	39	94	56	150	C vs B	0.0046
D	glp-1 ncl-1 rpp-30	23	41	116	34	150	D vs C	0.1448
Code	Genotype	Median Lifespan	Maximum Lifespan	Number of deaths	Censored	Number of worms	Comparison	p value (log-rank Mantel-Cox test)
A	glp-1 ncl-1 luci	21	38	102	23	125
B	glp-1 ncl-1 rpp-30	21	44	98	27	125	A vs B	0.0034

## Sheet: glp-1 ncl-1 mrps-5 mrpl-45
Code	Genotype	Median Lifespan	Maximum Lifespan	Number of deaths	Censored	Number of worms	Comparison	p value (log-rank Mantel-Cox test)
A	N2 luci	21	30	79	76	155	A vs D	<0.0001
B	glp-1 ncl-1 mrpl45i	30	45	104	41	145	B vs C	<0.0001
C	glp-1 ncl-1 luci	23	35	95	45	140	C vs D	<0.0001
D	glp-1 luci	27	43	102	42	144	D vs E	0.1349
E	glp-1 mrps5i	25	40	52	12	64
F	glp-1 ncl-1 mrps5i	26	43	61	29	90	F vs C	0.0005
Code	Genotype	Median Lifespan	Maximum Lifespan	Number of deaths	Censored	Number of worms	Comparison	p value (log-rank Mantel-Cox test)
A	glp-1 ncl-1 mrpl45i	25	42	107	45	152	A vs D	<0.0001
B	glp-1 ncl-1 mrps5i	18	40	120	31	151	B vs D	<0.0001
C	glp-1 ncl-1 mrps16i	19	44	116	35	151	C vs D	<0.0001
D	glp-1 ncl-1 luci	17	30	112	40	152

## Sheet: N2 mrps-16 popl-1
Code	Genotype	Median Lifespan	Maximum Lifespan	Number of deaths	Censored	Number of worms	Comparison	p value (log-rank Mantel-Cox test)
A	N2 luci	21	31	78	72	150
B	N2 mrps-16i	25	34	96	54	150	A vs B	0.0002
C	N2 popl-1i	25	34	87	63	150	A vs C	<0.0001
Code	Genotype	Median Lifespan	Maximum Lifespan	Number of deaths	Censored	Number of worms	Comparison	p value (log-rank Mantel-Cox test)
A	N2 luci	21	27	73	77	150
B	N2 mrps-16i	25	34	80	70	150	A vs B	0.1635
C	N2 popl-1i	25	36	88	62	150	A vs C	0.0031
Code	Genotype	Median Lifespan	Maximum Lifespan	Number of deaths	Censored	Number of worms	Comparison	p value (log-rank Mantel-Cox test)
A	N2 luci	19	28	13	120	133
B	N2 popl-1i	24	31	76	69	145	A vs B	0.5696
C	N2 mrps-16i	24	31	50	93	143	A vs C	0.2061

## Sheet: glp-1 ncl-1 rpoa-12
Code	Genotype	Median Lifespan	Maximum Lifespan	Number of deaths	Censored	Number of worms	Comparison	p value (log-rank Mantel-Cox test)
A	glp-1 luci	31	54	110	17	127	A vs B	<0.0001
B	glp-1 ncl-1 luci	24	40	117	28	145
C	glp-1 ncl-1 rpoa-12i	26	46	45	20	65	C vs B	0.0238
