# Supplementary material
Source: Research Square preprint supplement (doi:10.21203/rs.3.rs-9541370/v1)
Supplement: Supplementary file 7 [file 736eb38efc3bff10d8db0e70.xlsx]

## Sheet: RNAseq
ensembl_gene_id	log2(fold_change)	p_value	q_value	significant	comparison	technique	gene
WBGene00000001	0.208649	0.38855	0.486616	no	glp1ncl1 / glp1	RNA-seq	aap-1
WBGene00000002	-0.512522	0.0003	0.0010199	yes	glp1ncl1 / glp1	RNA-seq	aat-1
WBGene00000003	0.315097	0.0269	0.0561934	no	glp1ncl1 / glp1	RNA-seq	aat-2
WBGene00000004	-0.440658	0.0551	0.103045	no	glp1ncl1 / glp1	RNA-seq	aat-3
WBGene00000005	-0.397766	0.00255	0.00711629	yes	glp1ncl1 / glp1	RNA-seq	aat-4
WBGene00000006	0.12979	0.39305	0.491027	no	glp1ncl1 / glp1	RNA-seq	aat-5
WBGene00000007	0.423889	0.01135	0.0266698	yes	glp1ncl1 / glp1	RNA-seq	aat-6
WBGene00000008	0.547616	0.10445	0.174031	no	glp1ncl1 / glp1	RNA-seq	aat-7
WBGene00000009	1.39271	0.00175	0.00507822	yes	glp1ncl1 / glp1	RNA-seq	aat-8
WBGene00000010	0.402152	0.25695	0.350302	no	glp1ncl1 / glp1	RNA-seq	aat-9
WBGene00000012	0.170542	0.8662	0.9018	no	glp1ncl1 / glp1	RNA-seq	abf-1
WBGene00000013	0.467853	0.30605	0.402569	no	glp1ncl1 / glp1	RNA-seq	abf-2
WBGene00000015	0.685098	0.43485	0.531986	no	glp1ncl1 / glp1	RNA-seq	abf-4
WBGene00000016	0.181231	0.72485	0.789962	no	glp1ncl1 / glp1	RNA-seq	abf-5
WBGene00000017	-0.251723	0.56075	0.64879	no	glp1ncl1 / glp1	RNA-seq	abf-6
WBGene00000018	-0.038997	0.74655	0.807554	no	glp1ncl1 / glp1	RNA-seq	abl-1
WBGene00000020	-0.139926	0.24855	0.341742	no	glp1ncl1 / glp1	RNA-seq	abt-2
WBGene00000022	-0.241694	0.0327	0.0664047	no	glp1ncl1 / glp1	RNA-seq	abt-4
WBGene00000024	-0.0638882	0.89715	0.92467	no	glp1ncl1 / glp1	RNA-seq	abu-1
WBGene00000033	0.529747	0.1341	0.211607	no	glp1ncl1 / glp1	RNA-seq	abu-10
WBGene00000034	-0.777145	0.1437	0.223239	no	glp1ncl1 / glp1	RNA-seq	abu-11
WBGene00000035	-0.543697	0.0058	0.0147722	yes	glp1ncl1 / glp1	RNA-seq	ace-1
WBGene00000036	-0.213406	0.0912	0.15596	no	glp1ncl1 / glp1	RNA-seq	ace-2
WBGene00000037	-0.156581	0.61875	0.70005	no	glp1ncl1 / glp1	RNA-seq	ace-3,hot-7
WBGene00000039	0.150293	0.62695	0.707157	no	glp1ncl1 / glp1	RNA-seq	acn-1
WBGene00000040	0.0200027	0.84695	0.887043	no	glp1ncl1 / glp1	RNA-seq	aco-1
WBGene00000041	0.086357	0.43385	0.531057	no	glp1ncl1 / glp1	RNA-seq	aco-2
WBGene00000042	0.52612	0.1742	0.260024	no	glp1ncl1 / glp1	RNA-seq	acr-2
WBGene00000046	0.256522	0.56205	0.649969	no	glp1ncl1 / glp1	RNA-seq	acr-7
WBGene00000047	-0.219345	0.5298	0.620966	no	glp1ncl1 / glp1	RNA-seq	acr-8
WBGene00000048	-0.475311	0.30045	0.396768	no	glp1ncl1 / glp1	RNA-seq	acr-9
WBGene00000050	-0.844088	0.05	0.0950249	no	glp1ncl1 / glp1	RNA-seq	acr-11
WBGene00000051	-0.0529371	0.8604	0.897388	no	glp1ncl1 / glp1	RNA-seq	acr-12
WBGene00000054	-0.137933	0.486	0.580505	no	glp1ncl1 / glp1	RNA-seq	acr-15
WBGene00000055	0.228325	0.3574	0.455508	no	glp1ncl1 / glp1	RNA-seq	acr-16
WBGene00000056	-0.0980616	0.9158	0.938372	no	glp1ncl1 / glp1	RNA-seq	acr-17
WBGene00000057	-0.418655	0.0868	0.149792	no	glp1ncl1 / glp1	RNA-seq	acr-18
WBGene00000058	-0.162687	0.64635	0.724003	no	glp1ncl1 / glp1	RNA-seq	acr-19
WBGene00000059	0.187068	0.82895	0.873146	no	glp1ncl1 / glp1	RNA-seq	acr-20
WBGene00000060	0.190421	0.66805	0.742451	no	glp1ncl1 / glp1	RNA-seq	acr-21
WBGene00000061	-0.12774	0.76005	0.818531	no	glp1ncl1 / glp1	RNA-seq	lgc-11
WBGene00000062	1.28731	0.0234	0.0498497	yes	glp1ncl1 / glp1	RNA-seq	acr-23
WBGene00000063	-0.0973515	0.35305	0.451041	no	glp1ncl1 / glp1	RNA-seq	act-1
WBGene00000064	0.244254	0.018	0.0397979	yes	glp1ncl1 / glp1	RNA-seq	act-2
WBGene00000065	-0.185154	0.07585	0.134284	no	glp1ncl1 / glp1	RNA-seq	act-3
WBGene00000066	-0.205092	0.05595	0.104378	no	glp1ncl1 / glp1	RNA-seq	act-4
WBGene00000068	-0.148552	0.25355	0.346695	no	glp1ncl1 / glp1	RNA-seq	acy-1
WBGene00000069	-0.0754945	0.80055	0.850944	no	glp1ncl1 / glp1	RNA-seq	acy-2
WBGene00000070	-0.00652584	0.96045	0.970801	no	glp1ncl1 / glp1	RNA-seq	acy-3
WBGene00000071	-0.205812	0.13655	0.214499	no	glp1ncl1 / glp1	RNA-seq	acy-4
WBGene00000072	-0.302452	0.02705	0.0564618	no	glp1ncl1 / glp1	RNA-seq	add-1
WBGene00000073	0.0530887	0.6932	0.763816	no	glp1ncl1 / glp1	RNA-seq	add-2
WBGene00000074	0.003572	0.98515	0.988672	no	glp1ncl1 / glp1	RNA-seq	adm-2
WBGene00000075	0.0269821	0.855	0.893269	no	glp1ncl1 / glp1	RNA-seq	adm-4
WBGene00000079	-0.0771847	0.7731	0.829026	no	glp1ncl1 / glp1	RNA-seq	adr-1
WBGene00000080	0.0630549	0.68395	0.755932	no	glp1ncl1 / glp1	RNA-seq	adr-2
WBGene00000081	0.0760699	0.47095	0.566406	no	glp1ncl1 / glp1	RNA-seq	ads-1
WBGene00000082	-0.083109	0.6778	0.750763	no	glp1ncl1 / glp1	RNA-seq	adt-1
WBGene00000083	-0.198812	0.104	0.173415	no	glp1ncl1 / glp1	RNA-seq	adt-2
WBGene00000084	-0.255176	0.05995	0.110596	no	glp1ncl1 / glp1	RNA-seq	aex-1
WBGene00000085	-0.452404	0.18525	0.272881	no	glp1ncl1 / glp1	RNA-seq	aex-2
WBGene00000086	-0.0651108	0.68985	0.760911	no	glp1ncl1 / glp1	RNA-seq	aex-3
WBGene00000088	-0.287547	0.14815	0.228724	no	glp1ncl1 / glp1	RNA-seq	aex-5
WBGene00000089	-0.143303	0.44665	0.54322	no	glp1ncl1 / glp1	RNA-seq	aex-6
WBGene00000090	-0.345108	0.2382	0.331463	no	glp1ncl1 / glp1	RNA-seq	age-1
WBGene00000092	-0.303496	0.02635	0.0551991	no	glp1ncl1 / glp1	RNA-seq	ags-3
WBGene00000093	0.190998	0.434	0.531191	no	glp1ncl1 / glp1	RNA-seq	agt-1
WBGene00000094	-0.452395	0.40445	0.502241	no	glp1ncl1 / glp1	RNA-seq	agt-2
WBGene00000095	0.0124474	0.948	0.961859	no	glp1ncl1 / glp1	RNA-seq	aha-1
WBGene00000097	-0.0619858	0.72215	0.787795	no	glp1ncl1 / glp1	RNA-seq	aip-1
WBGene00000098	0.881788	0.0181	0.0399886	yes	glp1ncl1 / glp1	RNA-seq	air-1
WBGene00000099	1.97698	0.00135	0.00401909	yes	glp1ncl1 / glp1	RNA-seq	air-2
WBGene00000100	-0.31584	0.00435	0.0114497	yes	glp1ncl1 / glp1	RNA-seq	ajm-1
WBGene00000101	-0.0343587	0.75945	0.818079	no	glp1ncl1 / glp1	RNA-seq	aka-1
WBGene00000102	-0.310727	0.12375	0.198779	no	glp1ncl1 / glp1	RNA-seq	akt-1
WBGene00000103	-0.240686	0.06275	0.114844	no	glp1ncl1 / glp1	RNA-seq	akt-2
WBGene00000105	-0.354158	0.0928	0.158037	no	glp1ncl1 / glp1	RNA-seq	alg-1
WBGene00000106	0.0342095	0.8268	0.871495	no	glp1ncl1 / glp1	RNA-seq	alg-2
WBGene00000107	-0.0216618	0.8365	0.879001	no	glp1ncl1 / glp1	RNA-seq	alh-1
WBGene00000109	0.0660349	0.52165	0.613553	no	glp1ncl1 / glp1	RNA-seq	alh-3
WBGene00000110	-0.0136791	0.904	0.929753	no	glp1ncl1 / glp1	RNA-seq	alh-4,atp-4
WBGene00000111	0.417848	0.0069	0.0172244	yes	glp1ncl1 / glp1	RNA-seq	alh-5
WBGene00000112	-0.179011	0.0863	0.149104	no	glp1ncl1 / glp1	RNA-seq	alh-6
WBGene00000113	-0.0526994	0.64685	0.724435	no	glp1ncl1 / glp1	RNA-seq	alh-7
WBGene00000114	0.126785	0.26735	0.361601	no	glp1ncl1 / glp1	RNA-seq	alh-8
WBGene00000115	-0.255507	0.01715	0.0381749	yes	glp1ncl1 / glp1	RNA-seq	alh-9
WBGene00000116	-0.141623	0.2757	0.370532	no	glp1ncl1 / glp1	RNA-seq	alh-10
WBGene00000117	-0.21495	0.0674	0.121853	no	glp1ncl1 / glp1	RNA-seq	alh-11
WBGene00000118	-0.415628	5e-05	0.000190833	yes	glp1ncl1 / glp1	RNA-seq	alh-12
WBGene00000120	0.470152	0.001	0.00306446	yes	glp1ncl1 / glp1	RNA-seq	aly-1
WBGene00000121	0.6592	5e-05	0.000190833	yes	glp1ncl1 / glp1	RNA-seq	aly-2
WBGene00000122	0.0939202	0.4411	0.537951	no	glp1ncl1 / glp1	RNA-seq	aly-3
WBGene00000123	0.195284	0.07355	0.130901	no	glp1ncl1 / glp1	RNA-seq	ama-1
WBGene00000133	-0.240501	0.05285	0.0995466	no	glp1ncl1 / glp1	RNA-seq	amt-1
WBGene00000135	-0.12662	0.6445	0.72241	no	glp1ncl1 / glp1	RNA-seq	amt-3
WBGene00000136	-0.489687	5e-05	0.000190833	yes	glp1ncl1 / glp1	RNA-seq	amt-4
WBGene00000137	-0.0125576	0.9329	0.950965	no	glp1ncl1 / glp1	RNA-seq	amx-1
WBGene00000138	0.192452	0.1257	0.201291	no	glp1ncl1 / glp1	RNA-seq	amx-2
WBGene00000139	-0.464003	0.0086	0.0209064	yes	glp1ncl1 / glp1	RNA-seq	amx-3
WBGene00000140	-0.0982563	0.3804	0.478536	no	glp1ncl1 / glp1	RNA-seq	anc-1
WBGene00000142	0.374314	0.09725	0.16418	no	glp1ncl1 / glp1	RNA-seq	aos-1
WBGene00000143	0.194813	0.26605	0.360212	no	glp1ncl1 / glp1	RNA-seq	apc-2
WBGene00000144	-0.213033	0.68105	0.75351	no	glp1ncl1 / glp1	RNA-seq	apc-10
WBGene00000145	0.0417419	0.88825	0.918243	no	glp1ncl1 / glp1	RNA-seq	apc-11
WBGene00000146	-0.174798	0.14995	0.230961	no	glp1ncl1 / glp1	RNA-seq	ape-1
WBGene00000147	0.0647909	0.87345	0.90719	no	glp1ncl1 / glp1	RNA-seq	aph-1
WBGene00000148	0.0713423	0.85625	0.894205	no	glp1ncl1 / glp1	RNA-seq	aph-2
WBGene00000149	-0.0692087	0.49035	0.584615	no	glp1ncl1 / glp1	RNA-seq	apl-1
WBGene00000150	0.0980666	0.3983	0.496197	no	glp1ncl1 / glp1	RNA-seq	apm-1
WBGene00000151	0.152907	0.3858	0.483865	no	glp1ncl1 / glp1	RNA-seq	apn-1
WBGene00000155	-0.284235	0.00695	0.0173353	yes	glp1ncl1 / glp1	RNA-seq	app-1
WBGene00000156	0.0643909	0.7112	0.778808	no	glp1ncl1 / glp1	RNA-seq	2001-04-01
WBGene00000157	-0.227345	0.1236	0.198587	no	glp1ncl1 / glp1	RNA-seq	aps-2
WBGene00000158	-0.174354	0.1171	0.190521	no	glp1ncl1 / glp1	RNA-seq	apg-1
WBGene00000159	0.0712904	0.59655	0.680663	no	glp1ncl1 / glp1	RNA-seq	aps-1
WBGene00000160	0.0150975	0.90235	0.928512	no	glp1ncl1 / glp1	RNA-seq	apb-1
WBGene00000161	-0.0655387	0.56135	0.649343	no	glp1ncl1 / glp1	RNA-seq	apa-2
WBGene00000162	-0.146765	0.2264	0.31889	no	glp1ncl1 / glp1	RNA-seq	apd-3
WBGene00000163	-0.0139571	0.92415	0.944564	no	glp1ncl1 / glp1	RNA-seq	apb-3
WBGene00000164	-0.151019	0.31205	0.408899	no	glp1ncl1 / glp1	RNA-seq	apm-3
WBGene00000165	-0.141322	0.36095	0.459102	no	glp1ncl1 / glp1	RNA-seq	aps-3
WBGene00000166	-0.253159	0.39185	0.489872	no	glp1ncl1 / glp1	RNA-seq	apt-9
WBGene00000168	0.0347051	0.93545	0.95284	no	glp1ncl1 / glp1	RNA-seq	apx-1
WBGene00000169	0.107635	0.55635	0.644869	no	glp1ncl1 / glp1	RNA-seq	aqp-1
WBGene00000170	-0.029532	0.805	0.854462	no	glp1ncl1 / glp1	RNA-seq	aqp-2
WBGene00000171	-0.492135	0.1632	0.246972	no	glp1ncl1 / glp1	RNA-seq	aqp-3
WBGene00000172	-0.15512	0.2297	0.322429	no	glp1ncl1 / glp1	RNA-seq	aqp-4,marc-1
WBGene00000174	-0.482878	0.1255	0.201044	no	glp1ncl1 / glp1	RNA-seq	aqp-6
WBGene00000175	-0.457772	5e-05	0.000190833	yes	glp1ncl1 / glp1	RNA-seq	aqp-7
WBGene00000176	-0.330589	0.00505	0.0130694	yes	glp1ncl1 / glp1	RNA-seq	aqp-8
WBGene00000177	-0.404631	0.268	0.362288	no	glp1ncl1 / glp1	RNA-seq	aqp-9
WBGene00000178	0.192788	0.0769	0.135798	no	glp1ncl1 / glp1	RNA-seq	aqp-10
WBGene00000179	-0.233417	0.0322	0.0655381	no	glp1ncl1 / glp1	RNA-seq	aqp-11
WBGene00000180	-0.303607	0.0216	0.0465556	yes	glp1ncl1 / glp1	RNA-seq	arc-1
WBGene00000181	-0.0710304	0.4992	0.59287	no	glp1ncl1 / glp1	RNA-seq	ard-1
WBGene00000182	-0.046951	0.67295	0.746663	no	glp1ncl1 / glp1	RNA-seq	arf-1.2
WBGene00000183	0.164291	0.1385	0.216931	no	glp1ncl1 / glp1	RNA-seq	arf-3
WBGene00000184	-0.233953	0.3434	0.441219	no	glp1ncl1 / glp1	RNA-seq	arf-6
WBGene00000186	-0.0028259	0.98285	0.98696	no	glp1ncl1 / glp1	RNA-seq	ark-1
WBGene00000187	-0.0757246	0.621	0.70198	no	glp1ncl1 / glp1	RNA-seq	arl-1
WBGene00000188	-0.957107	0.69345	0.764028	no	glp1ncl1 / glp1	RNA-seq	arl-3
WBGene00000189	0.0528354	0.85235	0.891216	no	glp1ncl1 / glp1	RNA-seq	arl-5
WBGene00000190	1.12661	0.004	0.0106295	yes	glp1ncl1 / glp1	RNA-seq	arf-1.1
WBGene00000192	-0.00893429	0.94735	0.961401	no	glp1ncl1 / glp1	RNA-seq	arl-8
WBGene00000193	-0.182732	0.7354	0.798568	no	glp1ncl1 / glp1	RNA-seq	arl-6
WBGene00000195	-0.148909	0.33255	0.430156	no	glp1ncl1 / glp1	RNA-seq	arr-1
WBGene00000196	0.808445	5e-05	0.000190833	yes	glp1ncl1 / glp1	RNA-seq	aars-1
WBGene00000197	1.33984	5e-05	0.000190833	yes	glp1ncl1 / glp1	RNA-seq	aars-2
WBGene00000198	-0.374739	0.00025	0.000862343	yes	glp1ncl1 / glp1	RNA-seq	art-1
WBGene00000199	0.0779867	0.50945	0.602315	no	glp1ncl1 / glp1	RNA-seq	arx-1
WBGene00000200	0.0528569	0.6389	0.717552	no	glp1ncl1 / glp1	RNA-seq	arx-2
WBGene00000201	-0.0304328	0.78925	0.841948	no	glp1ncl1 / glp1	RNA-seq	arx-3
WBGene00000202	1.12567	5e-05	0.000190833	yes	glp1ncl1 / glp1	RNA-seq	exos-4.2
WBGene00000203	0.163617	0.2033	0.293494	no	glp1ncl1 / glp1	RNA-seq	arx-5
WBGene00000204	-0.0193723	0.9015	0.927885	no	glp1ncl1 / glp1	RNA-seq	arx-6
WBGene00000205	0.0818113	0.70495	0.773578	no	glp1ncl1 / glp1	RNA-seq	arx-7
WBGene00000206	0.300075	0.03945	0.0778676	no	glp1ncl1 / glp1	RNA-seq	asb-1
WBGene00000207	-0.033753	0.7515	0.811595	no	glp1ncl1 / glp1	RNA-seq	asb-2
WBGene00000208	0.389163	0.1294	0.205951	no	glp1ncl1 / glp1	RNA-seq	Y53F4B.14,asc-1
WBGene00000209	-0.100794	0.3551	0.453159	no	glp1ncl1 / glp1	RNA-seq	asg-1
WBGene00000210	-0.0612515	0.54755	0.636975	no	glp1ncl1 / glp1	RNA-seq	asg-2
WBGene00000211	-0.105379	0.4658	0.561598	no	glp1ncl1 / glp1	RNA-seq	asm-1
WBGene00000212	-0.485496	0.00045	0.00148033	yes	glp1ncl1 / glp1	RNA-seq	asm-2
WBGene00000213	0.123237	0.41945	0.517037	no	glp1ncl1 / glp1	RNA-seq	asm-3
WBGene00000214	-0.301527	0.0151	0.034181	yes	glp1ncl1 / glp1	RNA-seq	asp-1
WBGene00000215	-0.247172	0.02835	0.0587881	no	glp1ncl1 / glp1	RNA-seq	asp-2
WBGene00000216	-0.322631	0.00655	0.0164489	yes	glp1ncl1 / glp1	RNA-seq	asp-3
WBGene00000217	-0.348927	0.00085	0.00264436	yes	glp1ncl1 / glp1	RNA-seq	asp-4
WBGene00000218	-0.0801808	0.47165	0.567056	no	glp1ncl1 / glp1	RNA-seq	asp-5
WBGene00000219	-0.0395705	0.7569	0.815978	no	glp1ncl1 / glp1	RNA-seq	asp-6
WBGene00000220	0.0890267	0.7884	0.841246	no	glp1ncl1 / glp1	RNA-seq	atf-2
WBGene00000221	-0.262105	0.0255	0.0536761	no	glp1ncl1 / glp1	RNA-seq	atf-5
WBGene00000222	-0.187653	0.3159	0.412914	no	glp1ncl1 / glp1	RNA-seq	atf-6
WBGene00000223	-0.314038	0.01085	0.0256385	yes	glp1ncl1 / glp1	RNA-seq	atf-7
WBGene00000224	-0.187049	0.1071	0.17758	no	glp1ncl1 / glp1	RNA-seq	atgp-1
WBGene00000225	0.042618	0.86625	0.901841	no	glp1ncl1 / glp1	RNA-seq	atgp-2
WBGene00000226	0.0195901	0.8869	0.917244	no	glp1ncl1 / glp1	RNA-seq	atl-1
WBGene00000227	-0.210713	0.1708	0.255951	no	glp1ncl1 / glp1	RNA-seq	atm-1
WBGene00000228	-0.0329015	0.75205	0.812047	no	glp1ncl1 / glp1	RNA-seq	atn-1
WBGene00000229	0.0740524	0.5402	0.630352	no	glp1ncl1 / glp1	RNA-seq	atp-2
WBGene00000230	0.0189528	0.8579	0.895433	no	glp1ncl1 / glp1	RNA-seq	atp-3
WBGene00000231	-0.223302	0.09505	0.161131	no	glp1ncl1 / glp1	RNA-seq	atx-2
WBGene00000232	-0.144969	0.457	0.553185	no	glp1ncl1 / glp1	RNA-seq	avr-14
WBGene00000233	-0.146607	0.343	0.440834	no	glp1ncl1 / glp1	RNA-seq	avr-15
WBGene00000235	0.188058	0.1407	0.219662	no	glp1ncl1 / glp1	RNA-seq	baf-1
WBGene00000236	0.183659	0.4796	0.574516	no	glp1ncl1 / glp1	RNA-seq	bag-1
WBGene00000237	-0.263829	0.02635	0.0551991	no	glp1ncl1 / glp1	RNA-seq	bam-2
WBGene00000238	-0.217286	0.2177	0.309299	no	glp1ncl1 / glp1	RNA-seq	bar-1
WBGene00000239	-0.302319	0.007	0.0174426	yes	glp1ncl1 / glp1	RNA-seq	bas-1
WBGene00000240	-0.323438	0.00215	0.00610793	yes	glp1ncl1 / glp1	RNA-seq	pah-1
WBGene00000242	-0.622236	0.1857	0.27342	no	glp1ncl1 / glp1	RNA-seq	bbs-2
WBGene00000244	0.00435938	0.98175	0.986158	no	glp1ncl1 / glp1	RNA-seq	bbs-8
WBGene00000245	-0.287542	0.0263	0.0551101	no	glp1ncl1 / glp1	RNA-seq	bca-1
WBGene00000246	0.00284983	0.98515	0.988672	no	glp1ncl1 / glp1	RNA-seq	bcc-1
WBGene00000247	0.0155773	0.91755	0.93966	no	glp1ncl1 / glp1	RNA-seq	bec-1
WBGene00000248	-0.242846	0.0558	0.104145	no	glp1ncl1 / glp1	RNA-seq	ben-1
WBGene00000249	0.0418021	0.8606	0.897544	no	glp1ncl1 / glp1	RNA-seq	bir-1
WBGene00000250	5.51477	0.1334	0.210852	no	glp1ncl1 / glp1	RNA-seq	bir-2
WBGene00000251	1.75832	0.2388	0.332027	no	glp1ncl1 / glp1	RNA-seq	bli-1
WBGene00000252	0.923306	0.1046	0.174221	no	glp1ncl1 / glp1	RNA-seq	bli-2
WBGene00000253	0.0143919	0.89565	0.923574	no	glp1ncl1 / glp1	RNA-seq	bli-3
WBGene00000254	0.0621071	0.5607	0.64874	no	glp1ncl1 / glp1	RNA-seq	bli-4
WBGene00000255	-0.634313	0.1047	0.174357	no	glp1ncl1 / glp1	RNA-seq	bli-5
WBGene00000256	-0.194226	0.11055	0.182069	no	glp1ncl1 / glp1	RNA-seq	bli-6
WBGene00000257	1.5665	5e-05	0.000190833	yes	glp1ncl1 / glp1	RNA-seq	bmk-1
WBGene00000259	-0.0319534	0.83235	0.875777	no	glp1ncl1 / glp1	RNA-seq	bpl-1
WBGene00000262	-0.486794	0.12265	0.197409	no	glp1ncl1 / glp1	RNA-seq	bra-1
WBGene00000263	-0.139339	0.1788	0.265287	no	glp1ncl1 / glp1	RNA-seq	F23H11.5
WBGene00000264	0.375644	0.6439	0.721896	no	glp1ncl1 / glp1	RNA-seq	brc-1
WBGene00000266	0.0189937	0.8699	0.904591	no	glp1ncl1 / glp1	RNA-seq	bre-1
WBGene00000267	-0.156361	0.51165	0.604338	no	glp1ncl1 / glp1	RNA-seq	bre-2
WBGene00000268	-0.254465	0.0593	0.109609	no	glp1ncl1 / glp1	RNA-seq	bre-3
WBGene00000269	-0.174675	0.39005	0.488094	no	glp1ncl1 / glp1	RNA-seq	bre-4
WBGene00000270	-0.232772	0.38785	0.48591	no	glp1ncl1 / glp1	RNA-seq	bre-5
WBGene00000271	0.188226	0.3969	0.494818	no	glp1ncl1 / glp1	RNA-seq	brf-1
WBGene00000273	-0.235919	0.02355	0.0501268	no	glp1ncl1 / glp1	RNA-seq	brp-1
WBGene00000274	0.113933	0.36095	0.459102	no	glp1ncl1 / glp1	RNA-seq	btf-1
WBGene00000275	2.15554	5e-05	0.000190833	yes	glp1ncl1 / glp1	RNA-seq	bub-1
WBGene00000276	2.17674	5e-05	0.000190833	yes	glp1ncl1 / glp1	RNA-seq	byn-1
WBGene00000277	-0.398972	0.0001	0.000367464	yes	glp1ncl1 / glp1	RNA-seq	cab-1
WBGene00000279	-0.51849	0.217	0.308521	no	glp1ncl1 / glp1	RNA-seq	cah-1
WBGene00000280	-0.0887481	0.76785	0.824872	no	glp1ncl1 / glp1	RNA-seq	cah-2
WBGene00000281	-0.0425928	0.6887	0.759947	no	glp1ncl1 / glp1	RNA-seq	cah-3
WBGene00000282	-0.11604	0.26645	0.360648	no	glp1ncl1 / glp1	RNA-seq	cah-4
WBGene00000283	-0.221469	0.05055	0.0959042	no	glp1ncl1 / glp1	RNA-seq	cah-5
WBGene00000284	-0.11773	0.6644	0.739305	no	glp1ncl1 / glp1	RNA-seq	cah-6
WBGene00000285	-0.167076	0.6764	0.749644	no	glp1ncl1 / glp1	RNA-seq	cal-1
WBGene00000286	0.101516	0.66775	0.74218	no	glp1ncl1 / glp1	RNA-seq	cal-2
WBGene00000287	0.722426	0.017	0.0378922	yes	glp1ncl1 / glp1	RNA-seq	cal-3
WBGene00000288	0.0676785	0.76415	0.821888	no	glp1ncl1 / glp1	RNA-seq	cal-4
WBGene00000289	-0.149317	0.2153	0.306608	no	glp1ncl1 / glp1	RNA-seq	cam-1
WBGene00000292	-0.168613	0.13265	0.210129	no	glp1ncl1 / glp1	RNA-seq	cap-1
WBGene00000293	-0.114079	0.3447	0.442566	no	glp1ncl1 / glp1	RNA-seq	cap-2
WBGene00000294	-0.109763	0.3191	0.416273	no	glp1ncl1 / glp1	RNA-seq	cas-1
WBGene00000295	-0.475426	0.1258	0.201418	no	glp1ncl1 / glp1	RNA-seq	cat-1
WBGene00000296	-0.627831	0.1559	0.238102	no	glp1ncl1 / glp1	RNA-seq	cat-2
WBGene00000298	-0.599458	0.0261	0.0547488	no	glp1ncl1 / glp1	RNA-seq	cat-4
WBGene00000301	5.6921	0.21025	0.301136	no	glp1ncl1 / glp1	RNA-seq	cav-1
WBGene00000302	0.172002	0.6014	0.684894	no	glp1ncl1 / glp1	RNA-seq	cav-2
WBGene00000366	-0.150987	0.1525	0.234072	no	glp1ncl1 / glp1	RNA-seq	cbp-1
WBGene00000367	-0.334875	0.00745	0.0184271	yes	glp1ncl1 / glp1	RNA-seq	cca-1
WBGene00000368	-0.128744	0.35305	0.451041	no	glp1ncl1 / glp1	RNA-seq	ccb-1
WBGene00000369	-0.155569	0.34275	0.440597	no	glp1ncl1 / glp1	RNA-seq	ccf-1
WBGene00000370	0.1384	0.1955	0.284602	no	glp1ncl1 / glp1	RNA-seq	ccg-1
WBGene00000371	-0.0455576	0.6644	0.739305	no	glp1ncl1 / glp1	RNA-seq	cco-1
WBGene00000373	1.49664	5e-05	0.000190833	yes	glp1ncl1 / glp1	RNA-seq	cyp-14A5
WBGene00000375	0.0702129	0.7693	0.826031	no	glp1ncl1 / glp1	RNA-seq	ZK177.4,cyp-44A1
WBGene00000376	-0.157177	0.2507	0.343859	no	glp1ncl1 / glp1	RNA-seq	ccr-4
WBGene00000377	0.700951	5e-05	0.000190833	yes	glp1ncl1 / glp1	RNA-seq	cct-1
WBGene00000378	0.685451	5e-05	0.000190833	yes	glp1ncl1 / glp1	RNA-seq	cct-2
WBGene00000379	0.652713	5e-05	0.000190833	yes	glp1ncl1 / glp1	RNA-seq	cct-4
WBGene00000380	0.834692	5e-05	0.000190833	yes	glp1ncl1 / glp1	RNA-seq	cct-5
WBGene00000381	0.545334	5e-05	0.000190833	yes	glp1ncl1 / glp1	RNA-seq	cct-6
WBGene00000382	0.435343	0.01195	0.0278922	yes	glp1ncl1 / glp1	RNA-seq	cdc-6
WBGene00000383	-0.028695	0.9596	0.970161	no	glp1ncl1 / glp1	RNA-seq	cdc-14
WBGene00000386	0.817087	0.00115	0.00347703	yes	glp1ncl1 / glp1	RNA-seq	cdc-25.1
WBGene00000387	0.195829	0.61915	0.700396	no	glp1ncl1 / glp1	RNA-seq	cdc-25.2
WBGene00000390	-0.0553143	0.6439	0.721896	no	glp1ncl1 / glp1	RNA-seq	cdc-42
WBGene00000391	0.0770961	0.6453	0.723116	no	glp1ncl1 / glp1	RNA-seq	cdd-1
WBGene00000392	-0.519314	0.41605	0.513693	no	glp1ncl1 / glp1	RNA-seq	cdd-2
WBGene00000393	-0.274479	0.02755	0.0573587	no	glp1ncl1 / glp1	RNA-seq	cdf-1
WBGene00000395	0.260085	0.22955	0.322259	no	glp1ncl1 / glp1	RNA-seq	cdh-3
WBGene00000396	0.252891	0.0434	0.0844273	no	glp1ncl1 / glp1	RNA-seq	cdh-4
WBGene00000399	-0.163362	0.56305	0.650876	no	glp1ncl1 / glp1	RNA-seq	cdh-7
WBGene00000401	0.0488004	0.88255	0.913944	no	glp1ncl1 / glp1	RNA-seq	cdh-9
WBGene00000403	-0.184769	0.1621	0.245668	no	glp1ncl1 / glp1	RNA-seq	casy-1
WBGene00000405	3.43192	5e-05	0.000190833	yes	glp1ncl1 / glp1	RNA-seq	cdk-1
WBGene00000406	-0.0208875	0.92715	0.946765	no	glp1ncl1 / glp1	RNA-seq	cdk-4
WBGene00000407	0.325823	0.2357	0.328775	no	glp1ncl1 / glp1	RNA-seq	cdk-5
WBGene00000408	-0.0176329	0.9204	0.941787	no	glp1ncl1 / glp1	RNA-seq	cdk-7
WBGene00000409	-0.0106779	0.9663	0.97492	no	glp1ncl1 / glp1	RNA-seq	cdk-8
WBGene00000410	-0.0586059	0.68175	0.754118	no	glp1ncl1 / glp1	RNA-seq	cdk-9
WBGene00000411	1.56504	5e-05	0.000190833	yes	glp1ncl1 / glp1	RNA-seq	cdl-1
WBGene00000412	-1.48431	0.01315	0.0303117	yes	glp1ncl1 / glp1	RNA-seq	cdr-1
WBGene00000413	0.852704	0.0344	0.0693165	no	glp1ncl1 / glp1	RNA-seq	cdt-1
WBGene00000414	-0.0794776	0.56975	0.656802	no	glp1ncl1 / glp1	RNA-seq	cec-1
WBGene00000415	0.105224	0.3364	0.434129	no	glp1ncl1 / glp1	RNA-seq	ced-1
WBGene00000416	0.405897	0.0536	0.100733	no	glp1ncl1 / glp1	RNA-seq	ced-2
WBGene00000417	1.09384	0.13265	0.210129	no	glp1ncl1 / glp1	RNA-seq	ced-3
WBGene00000418	-0.0445428	0.83735	0.87967	no	glp1ncl1 / glp1	RNA-seq	ced-4
WBGene00000419	-0.0529435	0.64655	0.724177	no	glp1ncl1 / glp1	RNA-seq	ced-5
WBGene00000420	0.0105702	0.9442	0.959132	no	glp1ncl1 / glp1	RNA-seq	ced-6
WBGene00000421	-0.24863	0.02255	0.0483036	yes	glp1ncl1 / glp1	RNA-seq	ced-7
WBGene00000423	0.0490933	0.66495	0.739784	no	glp1ncl1 / glp1	RNA-seq	ced-9,mev-1
WBGene00000424	-0.175709	0.2197	0.311564	no	glp1ncl1 / glp1	RNA-seq	ced-10
WBGene00000425	-0.116196	0.4196	0.517163	no	glp1ncl1 / glp1	RNA-seq	ced-11
WBGene00000426	-0.100134	0.4459	0.542511	no	glp1ncl1 / glp1	RNA-seq	ced-12
WBGene00000428	-0.685097	0.23605	0.329146	no	glp1ncl1 / glp1	RNA-seq	ceh-1
WBGene00000430	0.595214	0.7421	0.80397	no	glp1ncl1 / glp1	RNA-seq	ceh-5
WBGene00000431	-0.373011	0.3553	0.453366	no	glp1ncl1 / glp1	RNA-seq	ceh-6
WBGene00000437	-0.205431	0.36395	0.462115	no	glp1ncl1 / glp1	RNA-seq	ceh-13
WBGene00000438	-0.263992	0.57545	0.661957	no	glp1ncl1 / glp1	RNA-seq	ceh-14
WBGene00000441	-0.293803	0.0255	0.0536761	no	glp1ncl1 / glp1	RNA-seq	ceh-18
WBGene00000442	0.203481	0.83245	0.875856	no	glp1ncl1 / glp1	RNA-seq	ceh-19
WBGene00000443	-0.253477	0.09375	0.159342	no	glp1ncl1 / glp1	RNA-seq	ceh-20
WBGene00000444	0.0641661	0.79525	0.846682	no	glp1ncl1 / glp1	RNA-seq	ceh-21
WBGene00000445	-0.000195149	0.99965	0.99969	no	glp1ncl1 / glp1	RNA-seq	ceh-22
WBGene00000447	-0.0399056	0.91935	0.941032	no	glp1ncl1 / glp1	RNA-seq	ceh-24
WBGene00000448	0.0904119	0.7038	0.772641	no	glp1ncl1 / glp1	RNA-seq	pros-1
WBGene00000449	-0.934258	0.1265	0.202334	no	glp1ncl1 / glp1	RNA-seq	ceh-27
WBGene00000451	-0.288707	0.477	0.572086	no	glp1ncl1 / glp1	RNA-seq	ceh-30
WBGene00000452	0.279049	0.6003	0.683949	no	glp1ncl1 / glp1	RNA-seq	ceh-31
WBGene00000453	-0.138699	0.4442	0.540889	no	glp1ncl1 / glp1	RNA-seq	ceh-32
WBGene00000454	-0.619738	0.2092	0.300068	no	glp1ncl1 / glp1	RNA-seq	ceh-33
WBGene00000455	0.00641282	0.9868	0.989895	no	glp1ncl1 / glp1	RNA-seq	ceh-34
WBGene00000458	-0.310381	0.07515	0.13327	no	glp1ncl1 / glp1	RNA-seq	ceh-37
WBGene00000459	-0.137013	0.537	0.627492	no	glp1ncl1 / glp1	RNA-seq	ceh-38
WBGene00000460	-0.0371967	0.9223	0.94322	no	glp1ncl1 / glp1	RNA-seq	ceh-39
WBGene00000462	0.72056	0.0013	0.00388526	yes	glp1ncl1 / glp1	RNA-seq	ceh-41
WBGene00000463	0.318021	0.37775	0.475909	no	glp1ncl1 / glp1	RNA-seq	ceh-43
WBGene00000464	-0.0108578	0.9304	0.94914	no	glp1ncl1 / glp1	RNA-seq	ceh-44
WBGene00000465	6.71645	5e-05	0.000190833	yes	glp1ncl1 / glp1	RNA-seq	cpg-1
WBGene00000466	0.0437634	0.8374	0.87972	no	glp1ncl1 / glp1	RNA-seq	cel-1
WBGene00000467	0.617549	0.1602	0.243346	no	glp1ncl1 / glp1	RNA-seq	cep-1
WBGene00000472	-0.0776672	0.4623	0.558271	no	glp1ncl1 / glp1	RNA-seq	cey-1
WBGene00000473	3.9807	5e-05	0.000190833	yes	glp1ncl1 / glp1	RNA-seq	cey-2
WBGene00000474	3.80699	5e-05	0.000190833	yes	glp1ncl1 / glp1	RNA-seq	cey-3
WBGene00000475	-0.0518943	0.63205	0.711644	no	glp1ncl1 / glp1	RNA-seq	cey-4
WBGene00000476	-0.0345639	0.8908	0.920051	no	glp1ncl1 / glp1	RNA-seq	cfi-1
WBGene00000477	-0.352028	0.24995	0.343136	no	glp1ncl1 / glp1	RNA-seq	cft-1
WBGene00000478	0.147623	0.60145	0.684934	no	glp1ncl1 / glp1	RNA-seq	cfz-2
WBGene00000479	0.137387	0.36055	0.458684	no	glp1ncl1 / glp1	RNA-seq	cgh-1
WBGene00000480	-0.0496579	0.7626	0.820614	no	glp1ncl1 / glp1	RNA-seq	cgp-1
WBGene00000481	-0.139383	0.44995	0.54641	no	glp1ncl1 / glp1	RNA-seq	cha-1,unc-17
WBGene00000482	0.0244094	0.82325	0.868733	no	glp1ncl1 / glp1	RNA-seq	chd-3
WBGene00000485	0.255805	0.0728	0.129797	no	glp1ncl1 / glp1	RNA-seq	che-3
WBGene00000488	-0.257795	0.43115	0.528455	no	glp1ncl1 / glp1	RNA-seq	che-7
WBGene00000490	-0.11538	0.69745	0.767293	no	glp1ncl1 / glp1	RNA-seq	che-11
WBGene00000491	0.011137	0.9656	0.974436	no	glp1ncl1 / glp1	RNA-seq	che-12
WBGene00000492	-0.550042	0.5723	0.659138	no	glp1ncl1 / glp1	RNA-seq	che-13
WBGene00000496	2.03758	5e-05	0.000190833	yes	glp1ncl1 / glp1	RNA-seq	T25G3.3,chs-1
WBGene00000497	0.72734	0.02665	0.0557413	no	glp1ncl1 / glp1	RNA-seq	chs-2
WBGene00000498	0.659609	0.3193	0.416478	no	glp1ncl1 / glp1	RNA-seq	chk-1
WBGene00000500	-0.0324488	0.81415	0.861717	no	glp1ncl1 / glp1	RNA-seq	chn-1
WBGene00000501	-0.190783	0.42795	0.525355	no	glp1ncl1 / glp1	RNA-seq	cho-1
WBGene00000502	0.0208018	0.88155	0.913253	no	glp1ncl1 / glp1	RNA-seq	chp-1
WBGene00000503	2.87911	5e-05	0.000190833	yes	glp1ncl1 / glp1	RNA-seq	cht-1
WBGene00000506	-0.0807921	0.6961	0.766226	no	glp1ncl1 / glp1	RNA-seq	cic-1
WBGene00000507	0.68821	0.0057	0.0145477	yes	glp1ncl1 / glp1	RNA-seq	cit-1.1
WBGene00000508	-0.233557	0.228	0.320602	no	glp1ncl1 / glp1	RNA-seq	cit-1.2
WBGene00000509	0.191349	0.0974	0.164387	no	glp1ncl1 / glp1	RNA-seq	cka-1
WBGene00000510	-0.229935	0.25925	0.352834	no	glp1ncl1 / glp1	RNA-seq	cka-2
WBGene00000511	0.10491	0.5212	0.613154	no	glp1ncl1 / glp1	RNA-seq	ckb-1
WBGene00000512	0.0929569	0.92195	0.942955	no	glp1ncl1 / glp1	RNA-seq	ckb-2
WBGene00000513	0.167847	0.71395	0.781099	no	glp1ncl1 / glp1	RNA-seq	ckb-3
WBGene00000514	-0.227249	0.1844	0.271885	no	glp1ncl1 / glp1	RNA-seq	ckb-4
WBGene00000515	-0.290479	0.0099	0.0236501	yes	glp1ncl1 / glp1	RNA-seq	ckc-1
WBGene00000516	-0.110967	0.6276	0.707736	no	glp1ncl1 / glp1	RNA-seq	cki-1
WBGene00000517	-0.282408	0.37615	0.47435	no	glp1ncl1 / glp1	RNA-seq	cki-2
WBGene00000518	0.0991456	0.6532	0.729768	no	glp1ncl1 / glp1	RNA-seq	ckk-1
WBGene00000519	-0.00644044	0.96695	0.97543	no	glp1ncl1 / glp1	RNA-seq	cku-70
WBGene00000520	0.490771	0.0274	0.0570886	no	glp1ncl1 / glp1	RNA-seq	cku-80
WBGene00000522	-0.409661	0.0012	0.00361429	yes	glp1ncl1 / glp1	RNA-seq	clc-1
WBGene00000523	0.511749	0.08475	0.146919	no	glp1ncl1 / glp1	RNA-seq	clc-2
WBGene00000524	0.0290022	0.8744	0.907889	no	glp1ncl1 / glp1	RNA-seq	clc-3
WBGene00000525	0.00524522	0.9758	0.981859	no	glp1ncl1 / glp1	RNA-seq	clc-4
WBGene00000526	-0.11351	0.6732	0.746892	no	glp1ncl1 / glp1	RNA-seq	clc-5
WBGene00000527	-0.18998	0.1099	0.181219	no	glp1ncl1 / glp1	RNA-seq	cle-1
WBGene00000528	-0.11487	0.3301	0.427614	no	glp1ncl1 / glp1	RNA-seq	clh-1
WBGene00000529	-0.138685	0.551	0.640067	no	glp1ncl1 / glp1	RNA-seq	clh-2
WBGene00000530	-0.540373	0.0001	0.000367464	yes	glp1ncl1 / glp1	RNA-seq	clh-3
WBGene00000531	-0.677603	0.026	0.054574	no	glp1ncl1 / glp1	RNA-seq	clh-4
WBGene00000532	0.0654019	0.592	0.676594	no	glp1ncl1 / glp1	RNA-seq	clh-5
WBGene00000533	0.0514153	0.69125	0.762165	no	glp1ncl1 / glp1	RNA-seq	clh-6
WBGene00000534	-0.364776	0.0009	0.00278523	yes	glp1ncl1 / glp1	RNA-seq	cpi-2
WBGene00000535	0.193645	0.06145	0.112882	no	glp1ncl1 / glp1	RNA-seq	cpi-1
WBGene00000536	-0.0863052	0.5693	0.656426	no	glp1ncl1 / glp1	RNA-seq	clk-1
WBGene00000537	0.000473753	0.9979	0.998241	no	glp1ncl1 / glp1	RNA-seq	clk-2
WBGene00000539	-0.167173	0.299	0.395273	no	glp1ncl1 / glp1	RNA-seq	cln-3.1
WBGene00000540	-0.0969517	0.55815	0.646442	no	glp1ncl1 / glp1	RNA-seq	cln-3.2
WBGene00000541	0.117451	0.6159	0.697542	no	glp1ncl1 / glp1	RNA-seq	cln-3.3
WBGene00000542	0.00528848	0.96215	0.97203	no	glp1ncl1 / glp1	RNA-seq	clp-1
WBGene00000543	0.00439999	0.97765	0.983192	no	glp1ncl1 / glp1	RNA-seq	clp-2
WBGene00000545	-0.288641	0.00975	0.0233381	yes	glp1ncl1 / glp1	RNA-seq	clp-4
WBGene00000547	-0.0572467	0.6296	0.709502	no	glp1ncl1 / glp1	RNA-seq	clp-7
WBGene00000548	0.0747343	0.51625	0.608631	no	glp1ncl1 / glp1	RNA-seq	clr-1
WBGene00000549	0.194321	0.1509	0.232132	no	glp1ncl1 / glp1	RNA-seq	cls-2
WBGene00000550	0.638997	5e-05	0.000190833	yes	glp1ncl1 / glp1	RNA-seq	clu-1
WBGene00000551	-3.95891	0.1148	0.187531	no	glp1ncl1 / glp1	RNA-seq	clx-1
WBGene00000552	-0.0779514	0.51665	0.608985	no	glp1ncl1 / glp1	RNA-seq	cmd-1
WBGene00000553	-0.601941	0.22295	0.31519	no	glp1ncl1 / glp1	RNA-seq	cmk-1
WBGene00000554	-0.1619	0.19105	0.279461	no	glp1ncl1 / glp1	RNA-seq	cnb-1
WBGene00000556	1.04436	0.035	0.0703401	no	glp1ncl1 / glp1	RNA-seq	cnc-2
WBGene00000557	-0.208883	0.29205	0.387931	no	glp1ncl1 / glp1	RNA-seq	cnc-3
WBGene00000558	0.116773	0.59615	0.680313	no	glp1ncl1 / glp1	RNA-seq	cnc-4
WBGene00000560	0.608954	0.3614	0.459565	no	glp1ncl1 / glp1	RNA-seq	cnc-6
WBGene00000562	1.59385	5e-05	0.000190833	yes	glp1ncl1 / glp1	RNA-seq	cng-1
WBGene00000564	-0.0315644	0.8676	0.90286	no	glp1ncl1 / glp1	RNA-seq	cnk-1
WBGene00000565	-0.213748	0.11995	0.193984	no	glp1ncl1 / glp1	RNA-seq	cnt-1
WBGene00000566	-0.187301	0.10185	0.170491	no	glp1ncl1 / glp1	RNA-seq	cnt-2
WBGene00000567	0.41906	5e-05	0.000190833	yes	glp1ncl1 / glp1	RNA-seq	cnx-1
WBGene00000583	-0.00442527	0.97775	0.983256	no	glp1ncl1 / glp1	RNA-seq	cof-2
WBGene00000584	-0.421009	0.45445	0.550765	no	glp1ncl1 / glp1	RNA-seq	cog-1
WBGene00000585	0.108696	0.3292	0.426685	no	glp1ncl1 / glp1	RNA-seq	cogc-2,ufl-1
WBGene00000591	-0.108216	0.5769	0.663235	no	glp1ncl1 / glp1	RNA-seq	coh-1
WBGene00000592	1.24619	0.0131	0.0302129	yes	glp1ncl1 / glp1	RNA-seq	coh-3
WBGene00000594	0.061164	0.80165	0.851785	no	glp1ncl1 / glp1	RNA-seq	col-3
WBGene00000596	0.391633	0.0172	0.0382692	yes	glp1ncl1 / glp1	RNA-seq	col-7
WBGene00000597	-0.632699	5e-05	0.000190833	yes	glp1ncl1 / glp1	RNA-seq	col-8
WBGene00000599	-0.175612	0.31545	0.412443	no	glp1ncl1 / glp1	RNA-seq	col-10
WBGene00000601	0.046781	0.70285	0.771832	no	glp1ncl1 / glp1	RNA-seq	col-12
WBGene00000602	0.305263	0.0474	0.0908899	no	glp1ncl1 / glp1	RNA-seq	col-13
WBGene00000603	0.490144	0.2073	0.297996	no	glp1ncl1 / glp1	RNA-seq	col-14
WBGene00000606	0.563844	0.0313	0.0639931	no	glp1ncl1 / glp1	RNA-seq	col-17
WBGene00000608	-0.351828	0.0158	0.0355495	yes	glp1ncl1 / glp1	RNA-seq	col-19
WBGene00000609	-0.453795	0.0034	0.00919843	yes	glp1ncl1 / glp1	RNA-seq	col-20
WBGene00000611	0.459924	0.00045	0.00148033	yes	glp1ncl1 / glp1	RNA-seq	col-34
WBGene00000615	0.502506	0.00025	0.000862343	yes	glp1ncl1 / glp1	RNA-seq	col-38
WBGene00000616	0.0260965	0.96515	0.974104	no	glp1ncl1 / glp1	RNA-seq	col-39
WBGene00000617	-0.852874	0.0907	0.155262	no	glp1ncl1 / glp1	RNA-seq	col-40
WBGene00000618	0.415406	0.8512	0.890347	no	glp1ncl1 / glp1	RNA-seq	col-41
WBGene00000620	-0.765047	0.01275	0.0295144	yes	glp1ncl1 / glp1	RNA-seq	col-43
WBGene00000622	0.906283	0.09255	0.157701	no	glp1ncl1 / glp1	RNA-seq	col-45
WBGene00000625	0.907876	0.0616	0.113102	no	glp1ncl1 / glp1	RNA-seq	col-48
WBGene00000626	0.312431	0.0491	0.0935936	no	glp1ncl1 / glp1	RNA-seq	col-49
WBGene00000630	-0.111344	0.87435	0.907863	no	glp1ncl1 / glp1	RNA-seq	col-53
WBGene00000631	0.939083	0.15585	0.238041	no	glp1ncl1 / glp1	RNA-seq	col-54
WBGene00000634	0.518823	0.106	0.176116	no	glp1ncl1 / glp1	RNA-seq	col-58
WBGene00000636	0.0698007	0.6604	0.735868	no	glp1ncl1 / glp1	RNA-seq	col-60
WBGene00000637	0.576755	0.336	0.433697	no	glp1ncl1 / glp1	RNA-seq	col-61
WBGene00000638	0.119443	0.43465	0.531794	no	glp1ncl1 / glp1	RNA-seq	col-62
WBGene00000639	0.763772	5e-05	0.000190833	yes	glp1ncl1 / glp1	RNA-seq	col-63
WBGene00000640	-0.0567074	0.8983	0.925517	no	glp1ncl1 / glp1	RNA-seq	col-64
WBGene00000641	-0.278413	0.233	0.325949	no	glp1ncl1 / glp1	RNA-seq	col-65
WBGene00000644	0.174367	0.46775	0.563372	no	glp1ncl1 / glp1	RNA-seq	col-68
WBGene00000645	0.355463	0.47745	0.572494	no	glp1ncl1 / glp1	RNA-seq	col-69
WBGene00000647	-0.0413323	0.80265	0.8526	no	glp1ncl1 / glp1	RNA-seq	col-71
WBGene00000649	0.391426	0.003	0.00822558	yes	glp1ncl1 / glp1	RNA-seq	col-73
WBGene00000652	-0.263071	0.0343	0.0691442	no	glp1ncl1 / glp1	RNA-seq	col-76
WBGene00000653	0.253325	0.04455	0.0863002	no	glp1ncl1 / glp1	RNA-seq	col-77
WBGene00000655	0.81534	0.62015	0.701238	no	glp1ncl1 / glp1	RNA-seq	col-79
WBGene00000656	-0.281277	0.05855	0.108446	no	glp1ncl1 / glp1	RNA-seq	col-80
WBGene00000657	-0.413826	5e-05	0.000190833	yes	glp1ncl1 / glp1	RNA-seq	col-81
WBGene00000658	1.7566	5e-05	0.000190833	yes	glp1ncl1 / glp1	RNA-seq	F33A8.4,col-83
WBGene00000661	-0.399705	0.0028	0.00773399	yes	glp1ncl1 / glp1	RNA-seq	col-86,rict-1
WBGene00000663	-0.228477	0.14465	0.224423	no	glp1ncl1 / glp1	RNA-seq	col-88
WBGene00000664	0.444671	0.1505	0.231649	no	glp1ncl1 / glp1	RNA-seq	col-89
WBGene00000665	0.179329	0.78315	0.837092	no	glp1ncl1 / glp1	RNA-seq	col-90
WBGene00000666	-0.00106899	0.99655	0.997169	no	glp1ncl1 / glp1	RNA-seq	col-91
WBGene00000667	0.103405	0.3235	0.420814	no	glp1ncl1 / glp1	RNA-seq	col-92
WBGene00000668	-0.216569	0.0757	0.134066	no	glp1ncl1 / glp1	RNA-seq	col-93
WBGene00000669	-0.120259	0.29755	0.393724	no	glp1ncl1 / glp1	RNA-seq	col-94
WBGene00000670	-0.75575	5e-05	0.000190833	yes	glp1ncl1 / glp1	RNA-seq	col-95
WBGene00000671	-0.216026	0.05025	0.0954228	no	glp1ncl1 / glp1	RNA-seq	col-96
WBGene00000672	0.140663	0.4281	0.525494	no	glp1ncl1 / glp1	RNA-seq	col-97
WBGene00000673	-0.516935	5e-05	0.000190833	yes	glp1ncl1 / glp1	RNA-seq	col-98
WBGene00000674	0.136716	0.67365	0.747255	no	glp1ncl1 / glp1	RNA-seq	col-99
WBGene00000675	-0.424742	0.00095	0.00292569	yes	glp1ncl1 / glp1	RNA-seq	col-101
WBGene00000677	-0.485537	5e-05	0.000190833	yes	glp1ncl1 / glp1	RNA-seq	col-103
WBGene00000678	0.320446	0.04125	0.0808689	no	glp1ncl1 / glp1	RNA-seq	col-104
WBGene00000680	-0.44853	0.0004	0.00132807	yes	glp1ncl1 / glp1	RNA-seq	col-106
WBGene00000681	-0.0405192	0.9396	0.955793	no	glp1ncl1 / glp1	RNA-seq	col-107
WBGene00000683	0.508367	0.00725	0.0179923	yes	glp1ncl1 / glp1	RNA-seq	col-109
WBGene00000684	1.12371	0.6117	0.693874	no	glp1ncl1 / glp1	RNA-seq	col-110
WBGene00000685	0.407095	0.48635	0.58083	no	glp1ncl1 / glp1	RNA-seq	col-111
WBGene00000687	0.112937	0.81455	0.862014	no	glp1ncl1 / glp1	RNA-seq	col-113
WBGene00000689	0.142085	0.87845	0.910941	no	glp1ncl1 / glp1	RNA-seq	col-115
WBGene00000690	-0.475153	0.1706	0.255713	no	glp1ncl1 / glp1	RNA-seq	col-116
WBGene00000691	0.434129	0.00325	0.00883451	yes	glp1ncl1 / glp1	RNA-seq	col-117
WBGene00000692	0.43858	0.0001	0.000367464	yes	glp1ncl1 / glp1	RNA-seq	col-118
WBGene00000693	-0.318583	0.0677	0.12231	no	glp1ncl1 / glp1	RNA-seq	col-119
WBGene00000694	0.00105025	0.99465	0.995744	no	glp1ncl1 / glp1	RNA-seq	col-120
WBGene00000696	-0.493381	0.0002	0.000701644	yes	glp1ncl1 / glp1	RNA-seq	col-122
WBGene00000698	-0.50764	0.0028	0.00773399	yes	glp1ncl1 / glp1	RNA-seq	col-124
WBGene00000699	0.325147	0.0076	0.0187549	yes	glp1ncl1 / glp1	RNA-seq	col-125
WBGene00000701	0.589659	0.2711	0.365603	no	glp1ncl1 / glp1	RNA-seq	col-127
WBGene00000702	0.245211	0.5963	0.680453	no	glp1ncl1 / glp1	RNA-seq	col-128
WBGene00000703	-0.489177	5e-05	0.000190833	yes	glp1ncl1 / glp1	RNA-seq	col-129
WBGene00000704	0.0817898	0.7278	0.792396	no	glp1ncl1 / glp1	RNA-seq	col-130
WBGene00000707	0.32179	0.00495	0.0128422	yes	glp1ncl1 / glp1	RNA-seq	col-133
WBGene00000708	-0.386401	0.00235	0.00661478	yes	glp1ncl1 / glp1	RNA-seq	col-135
WBGene00000710	-0.249542	0.3575	0.45561	no	glp1ncl1 / glp1	RNA-seq	col-137
WBGene00000711	0.410009	0.305	0.401488	no	glp1ncl1 / glp1	RNA-seq	col-138
WBGene00000712	-0.489014	5e-05	0.000190833	yes	glp1ncl1 / glp1	RNA-seq	col-139
WBGene00000713	-0.288889	0.09145	0.156316	no	glp1ncl1 / glp1	RNA-seq	col-140
WBGene00000714	0.749217	0.0003	0.0010199	yes	glp1ncl1 / glp1	RNA-seq	col-141
WBGene00000715	0.113493	0.2972	0.393371	no	glp1ncl1 / glp1	RNA-seq	col-142
WBGene00000716	-0.141396	0.2567	0.350039	no	glp1ncl1 / glp1	RNA-seq	col-143
WBGene00000717	-0.00643461	0.96665	0.97518	no	glp1ncl1 / glp1	RNA-seq	col-144
WBGene00000718	-0.0553521	0.8032	0.853033	no	glp1ncl1 / glp1	RNA-seq	col-145
WBGene00000719	0.232183	0.1276	0.203705	no	glp1ncl1 / glp1	RNA-seq	col-146
WBGene00000720	0.285353	0.00945	0.0227096	yes	glp1ncl1 / glp1	RNA-seq	col-147
WBGene00000722	0.344697	0.00165	0.00481608	yes	glp1ncl1 / glp1	RNA-seq	col-149
WBGene00000723	-0.225815	0.0864	0.149245	no	glp1ncl1 / glp1	RNA-seq	col-150
WBGene00000725	0.951799	0.05335	0.100345	no	glp1ncl1 / glp1	RNA-seq	col-152
WBGene00000726	-0.093832	0.53055	0.621671	no	glp1ncl1 / glp1	RNA-seq	col-153
WBGene00000727	0.549866	0.002	0.00572515	yes	glp1ncl1 / glp1	RNA-seq	col-154
WBGene00000728	0.0790726	0.46775	0.563372	no	glp1ncl1 / glp1	RNA-seq	col-155
WBGene00000729	0.356373	0.4486	0.545129	no	glp1ncl1 / glp1	RNA-seq	col-156
WBGene00000730	0.232146	0.30605	0.402569	no	glp1ncl1 / glp1	RNA-seq	col-157
WBGene00000731	-0.485529	0.2851	0.380652	no	glp1ncl1 / glp1	RNA-seq	col-158
WBGene00000732	-0.130379	0.20905	0.299903	no	glp1ncl1 / glp1	RNA-seq	col-159
WBGene00000733	-0.16483	0.1778	0.264109	no	glp1ncl1 / glp1	RNA-seq	col-160
WBGene00000734	0.147738	0.2645	0.358509	no	glp1ncl1 / glp1	RNA-seq	col-161
WBGene00000735	0.103934	0.48155	0.57634	no	glp1ncl1 / glp1	RNA-seq	col-162
WBGene00000739	0.164704	0.1442	0.223854	no	glp1ncl1 / glp1	RNA-seq	col-166
WBGene00000740	0.333685	0.05815	0.107815	no	glp1ncl1 / glp1	RNA-seq	col-167
WBGene00000741	0.259783	0.2412	0.334487	no	glp1ncl1 / glp1	RNA-seq	col-168
WBGene00000742	0.0841163	0.74835	0.809022	no	glp1ncl1 / glp1	RNA-seq	col-169
WBGene00000743	-0.324759	0.4077	0.505452	no	glp1ncl1 / glp1	RNA-seq	col-170
WBGene00000745	0.506128	0.4358	0.532883	no	glp1ncl1 / glp1	RNA-seq	col-172
WBGene00000746	0.168717	0.60065	0.684254	no	glp1ncl1 / glp1	RNA-seq	col-173
WBGene00000747	0.931552	0.0609	0.112032	no	glp1ncl1 / glp1	RNA-seq	col-174
WBGene00000748	0.34207	0.02005	0.0436757	yes	glp1ncl1 / glp1	RNA-seq	col-175
WBGene00000749	0.00665119	0.97055	0.977984	no	glp1ncl1 / glp1	RNA-seq	col-176
WBGene00000750	0.355802	0.2933	0.389289	no	glp1ncl1 / glp1	RNA-seq	col-177
WBGene00000751	-0.333043	0.0097	0.0232367	yes	glp1ncl1 / glp1	RNA-seq	col-178
WBGene00000752	-0.183685	0.08515	0.147499	no	glp1ncl1 / glp1	RNA-seq	col-179
WBGene00000753	0.14119	0.23875	0.332011	no	glp1ncl1 / glp1	RNA-seq	col-180
WBGene00000754	-0.49588	0.0011	0.00333997	yes	glp1ncl1 / glp1	RNA-seq	col-181
WBGene00000755	-0.261057	0.6096	0.69209	no	glp1ncl1 / glp1	RNA-seq	col-182
WBGene00000757	-0.426885	0.00065	0.00207245	yes	glp1ncl1 / glp1	RNA-seq	col-184
WBGene00000759	-0.0802419	0.7755	0.83099	no	glp1ncl1 / glp1	RNA-seq	col-186
WBGene00000761	-0.0610077	0.5785	0.664665	no	glp1ncl1 / glp1	RNA-seq	coq-1
WBGene00000762	-0.0822297	0.5644	0.652096	no	glp1ncl1 / glp1	RNA-seq	coq-2
WBGene00000763	0.0543432	0.7524	0.812326	no	glp1ncl1 / glp1	RNA-seq	coq-3
WBGene00000764	0.15956	0.3569	0.455006	no	glp1ncl1 / glp1	RNA-seq	coq-4
WBGene00000765	0.0327737	0.7959	0.847219	no	glp1ncl1 / glp1	RNA-seq	coq-5
WBGene00000766	-0.336968	0.00945	0.0227096	yes	glp1ncl1 / glp1	RNA-seq	coq-6
WBGene00000767	0.236011	0.02975	0.0612754	no	glp1ncl1 / glp1	RNA-seq	coq-8
WBGene00000768	0.0712564	0.5541	0.642869	no	glp1ncl1 / glp1	RNA-seq	cor-1
WBGene00000773	0.240571	0.325	0.422355	no	glp1ncl1 / glp1	RNA-seq	cpf-1
WBGene00000774	0.120469	0.5084	0.601351	no	glp1ncl1 / glp1	RNA-seq	cpf-2
WBGene00000775	-0.128425	0.31535	0.412334	no	glp1ncl1 / glp1	RNA-seq	cpin-1
WBGene00000776	-0.323404	0.00525	0.013528	yes	glp1ncl1 / glp1	RNA-seq	cpl-1
WBGene00000777	0.458109	5e-05	0.000190833	yes	glp1ncl1 / glp1	RNA-seq	cpn-1
WBGene00000778	-0.228845	0.412	0.509691	no	glp1ncl1 / glp1	RNA-seq	cpn-2
WBGene00000779	-0.0736014	0.47715	0.572229	no	glp1ncl1 / glp1	RNA-seq	cpn-3
WBGene00000780	0.119583	0.26565	0.359775	no	glp1ncl1 / glp1	RNA-seq	cpn-4
WBGene00000781	1.97395	5e-05	0.000190833	yes	glp1ncl1 / glp1	RNA-seq	cpr-1
WBGene00000783	0.241857	0.081	0.141654	no	glp1ncl1 / glp1	RNA-seq	cpr-3
WBGene00000784	1.05207	5e-05	0.000190833	yes	glp1ncl1 / glp1	RNA-seq	cpr-4
WBGene00000785	0.492814	5e-05	0.000190833	yes	glp1ncl1 / glp1	RNA-seq	cpr-5
WBGene00000786	-0.464085	5e-05	0.000190833	yes	glp1ncl1 / glp1	RNA-seq	cpr-6
WBGene00000787	0.927371	5e-05	0.000190833	yes	glp1ncl1 / glp1	RNA-seq	cps-6
WBGene00000788	-0.415742	0.00015	0.000536873	yes	glp1ncl1 / glp1	RNA-seq	cpz-1
WBGene00000789	-0.144555	0.1668	0.25117	no	glp1ncl1 / glp1	RNA-seq	cpz-2
WBGene00000792	0.102059	0.6395	0.718076	no	glp1ncl1 / glp1	RNA-seq	crb-1
WBGene00000793	-0.343209	0.0142	0.0324005	yes	glp1ncl1 / glp1	RNA-seq	crh-1
WBGene00000794	0.230014	0.24075	0.334016	no	glp1ncl1 / glp1	RNA-seq	crn-1
WBGene00000795	0.817996	5e-05	0.000190833	yes	glp1ncl1 / glp1	RNA-seq	crn-2
WBGene00000796	1.31964	5e-05	0.000190833	yes	glp1ncl1 / glp1	RNA-seq	crn-3
WBGene00000797	0.440246	0.15875	0.24159	no	glp1ncl1 / glp1	RNA-seq	crn-4
WBGene00000798	1.31003	5e-05	0.000190833	yes	glp1ncl1 / glp1	RNA-seq	crn-5
WBGene00000799	-0.0812059	0.5379	0.6283	no	glp1ncl1 / glp1	RNA-seq	crn-6
WBGene00000800	0.115802	0.29345	0.389448	no	glp1ncl1 / glp1	RNA-seq	cars-1
WBGene00000802	0.152949	0.1801	0.266841	no	glp1ncl1 / glp1	RNA-seq	crt-1
WBGene00000803	-0.129925	0.5518	0.640776	no	glp1ncl1 / glp1	RNA-seq	csb-1
WBGene00000804	1.2002	0.02395	0.0508527	no	glp1ncl1 / glp1	RNA-seq	csc-1
WBGene00000812	-0.134391	0.33705	0.434789	no	glp1ncl1 / glp1	RNA-seq	csk-1
WBGene00000813	0.0758531	0.554	0.642779	no	glp1ncl1 / glp1	RNA-seq	csn-1
WBGene00000814	0.195552	0.1021	0.170838	no	glp1ncl1 / glp1	RNA-seq	csn-2
WBGene00000815	-0.0231726	0.865	0.900975	no	glp1ncl1 / glp1	RNA-seq	csn-3
WBGene00000816	0.203728	0.1579	0.240555	no	glp1ncl1 / glp1	RNA-seq	csn-4
WBGene00000817	0.0354034	0.80345	0.853254	no	glp1ncl1 / glp1	RNA-seq	csn-5
WBGene00000818	0.154181	0.25015	0.343311	no	glp1ncl1 / glp1	RNA-seq	csn-6
WBGene00000822	-0.0126646	0.90645	0.931594	no	glp1ncl1 / glp1	RNA-seq	csq-1
WBGene00000829	0.211665	0.08025	0.140611	no	glp1ncl1 / glp1	RNA-seq	ctb-1
WBGene00000830	6.03084	0.0002	0.000701644	yes	glp1ncl1 / glp1	RNA-seq	ctl-1
WBGene00000831	-0.540762	5e-05	0.000190833	yes	glp1ncl1 / glp1	RNA-seq	ctl-2
WBGene00000832	0.318688	0.0211	0.0456448	yes	glp1ncl1 / glp1	RNA-seq	ctn-1
WBGene00000833	0.324644	0.0027	0.00748618	yes	glp1ncl1 / glp1	RNA-seq	cts-1
WBGene00000834	-0.0939795	0.3905	0.488532	no	glp1ncl1 / glp1	RNA-seq	cua-1
WBGene00000835	-0.193577	0.13385	0.211311	no	glp1ncl1 / glp1	RNA-seq	cuc-1
WBGene00000836	0.0150228	0.90515	0.930616	no	glp1ncl1 / glp1	RNA-seq	cul-1
WBGene00000837	0.0098329	0.9321	0.950416	no	glp1ncl1 / glp1	RNA-seq	cul-2
WBGene00000838	0.150524	0.245	0.33831	no	glp1ncl1 / glp1	RNA-seq	cul-3
WBGene00000839	-0.122234	0.36025	0.458375	no	glp1ncl1 / glp1	RNA-seq	cul-4
WBGene00000840	0.165012	0.2119	0.302931	no	glp1ncl1 / glp1	RNA-seq	cul-5
WBGene00000841	-0.0370006	0.82565	0.870596	no	glp1ncl1 / glp1	RNA-seq	cul-6
WBGene00000843	0.12977	0.26005	0.353688	no	glp1ncl1 / glp1	RNA-seq	cup-2
WBGene00000845	-0.178776	0.1864	0.274246	no	glp1ncl1 / glp1	RNA-seq	cup-4
WBGene00000846	-0.252889	0.11115	0.182738	no	glp1ncl1 / glp1	RNA-seq	cup-5
WBGene00000853	-0.0503468	0.8773	0.910055	no	glp1ncl1 / glp1	RNA-seq	cut-6
WBGene00000854	0.0619408	0.7027	0.771703	no	glp1ncl1 / glp1	RNA-seq	cux-7
WBGene00000857	0.226575	0.20285	0.292959	no	glp1ncl1 / glp1	RNA-seq	cwn-1
WBGene00000858	-0.172736	0.4469	0.543473	no	glp1ncl1 / glp1	RNA-seq	cwn-2
WBGene00000862	-0.563383	0.4746	0.569829	no	glp1ncl1 / glp1	RNA-seq	cwp-4
WBGene00000863	0.296361	0.3978	0.495713	no	glp1ncl1 / glp1	RNA-seq	cya-1
WBGene00000865	1.91058	5e-05	0.000190833	yes	glp1ncl1 / glp1	RNA-seq	cyb-1
WBGene00000866	6.45084	0.1334	0.210852	no	glp1ncl1 / glp1	RNA-seq	cyb-2.1
WBGene00000867	4.45286	0.1123	0.184298	no	glp1ncl1 / glp1	RNA-seq	cyb-2.2
WBGene00000868	2.41646	5e-05	0.000190833	yes	glp1ncl1 / glp1	RNA-seq	cyb-3
WBGene00000869	-0.00711192	0.9538	0.966055	no	glp1ncl1 / glp1	RNA-seq	cyc-1
WBGene00000871	1.2366	0.0061	0.0154476	yes	glp1ncl1 / glp1	RNA-seq	cye-1
WBGene00000872	-0.174596	0.1909	0.279298	no	glp1ncl1 / glp1	RNA-seq	cyk-1
WBGene00000874	0.131678	0.2695	0.363889	no	glp1ncl1 / glp1	RNA-seq	cyk-3
WBGene00000875	0.683703	0.0011	0.00333997	yes	glp1ncl1 / glp1	RNA-seq	cyk-4
WBGene00000876	0.201321	0.13255	0.210006	no	glp1ncl1 / glp1	RNA-seq	cyl-1
WBGene00000877	1.29351	5e-05	0.000190833	yes	glp1ncl1 / glp1	RNA-seq	cyn-1
WBGene00000878	0.154708	0.6695	0.743682	no	glp1ncl1 / glp1	RNA-seq	cyn-2
WBGene00000879	0.0579914	0.5821	0.667866	no	glp1ncl1 / glp1	RNA-seq	bath-36,cyn-3
WBGene00000880	-0.0566202	0.82995	0.873905	no	glp1ncl1 / glp1	RNA-seq	cyn-4
WBGene00000881	0.110966	0.31025	0.407011	no	glp1ncl1 / glp1	RNA-seq	cyn-5
WBGene00000882	0.240635	0.0437	0.0849211	no	glp1ncl1 / glp1	RNA-seq	cyn-6
WBGene00000883	0.234946	0.0325	0.0660576	no	glp1ncl1 / glp1	RNA-seq	cyn-7
WBGene00000884	0.317162	0.06175	0.11332	no	glp1ncl1 / glp1	RNA-seq	cyn-8
WBGene00000885	2.08771	0.0049	0.0127275	yes	glp1ncl1 / glp1	RNA-seq	cyn-9
WBGene00000886	0.366903	0.5668	0.654197	no	glp1ncl1 / glp1	RNA-seq	cyn-10
WBGene00000887	0.28832	0.1914	0.27988	no	glp1ncl1 / glp1	RNA-seq	cyn-11
WBGene00000888	0.77936	0.0052	0.0134141	yes	glp1ncl1 / glp1	RNA-seq	cyn-12
WBGene00000889	-0.251621	0.1743	0.260139	no	glp1ncl1 / glp1	RNA-seq	cyn-13
WBGene00000890	0.303685	0.0587	0.108672	no	glp1ncl1 / glp1	RNA-seq	sig-7
WBGene00000891	0.129292	0.3636	0.461765	no	glp1ncl1 / glp1	RNA-seq	cyn-15
WBGene00000892	0.145132	0.31325	0.410147	no	glp1ncl1 / glp1	RNA-seq	cyn-16
WBGene00000893	0.703522	0.12845	0.204747	no	glp1ncl1 / glp1	RNA-seq	cyn-17
WBGene00000894	0.0291798	0.80915	0.857717	no	glp1ncl1 / glp1	RNA-seq	dab-1
WBGene00000895	0.0219188	0.9328	0.950908	no	glp1ncl1 / glp1	RNA-seq	dac-1
WBGene00000896	0.542226	5e-05	0.000190833	yes	glp1ncl1 / glp1	RNA-seq	dad-1
WBGene00000897	-0.0804661	0.5681	0.655354	no	glp1ncl1 / glp1	RNA-seq	daf-1
WBGene00000898	-0.159774	0.15325	0.234885	no	glp1ncl1 / glp1	RNA-seq	daf-2
WBGene00000899	-0.242864	0.13375	0.211189	no	glp1ncl1 / glp1	RNA-seq	daf-3
WBGene00000900	-0.193516	0.1894	0.277555	no	glp1ncl1 / glp1	RNA-seq	daf-4
WBGene00000901	-0.0379767	0.78275	0.836753	no	glp1ncl1 / glp1	RNA-seq	daf-5
WBGene00000902	0.0500569	0.86505	0.901009	no	glp1ncl1 / glp1	RNA-seq	daf-6
WBGene00000903	-0.169328	0.50475	0.597968	no	glp1ncl1 / glp1	RNA-seq	daf-7
WBGene00000904	-0.395104	0.00825	0.0201511	yes	glp1ncl1 / glp1	RNA-seq	daf-8
WBGene00000905	-0.269844	0.309	0.405691	no	glp1ncl1 / glp1	RNA-seq	daf-9
WBGene00000906	-0.0493582	0.9199	0.941438	no	glp1ncl1 / glp1	RNA-seq	daf-10
WBGene00000908	-0.202384	0.21775	0.309352	no	glp1ncl1 / glp1	RNA-seq	daf-12
WBGene00000910	-0.0227986	0.9	0.926729	no	glp1ncl1 / glp1	RNA-seq	daf-14
WBGene00000911	0.199008	0.06935	0.124713	no	glp1ncl1 / glp1	RNA-seq	daf-15
WBGene00000912	-0.322296	0.0176	0.0390355	yes	glp1ncl1 / glp1	RNA-seq	daf-16
WBGene00000913	0.735478	5e-05	0.000190833	yes	glp1ncl1 / glp1	RNA-seq	daf-18
WBGene00000914	-0.147259	0.5141	0.606635	no	glp1ncl1 / glp1	RNA-seq	daf-19
WBGene00000915	0.779639	5e-05	0.000190833	yes	glp1ncl1 / glp1	RNA-seq	daf-21
WBGene00000917	0.118132	0.4291	0.526464	no	glp1ncl1 / glp1	RNA-seq	daf-25
WBGene00000920	-0.104843	0.8483	0.888087	no	glp1ncl1 / glp1	RNA-seq	daf-28
WBGene00000923	0.333295	0.01385	0.0317014	yes	glp1ncl1 / glp1	RNA-seq	daf-31
WBGene00000928	0.930836	5e-05	0.000190833	yes	glp1ncl1 / glp1	RNA-seq	dao-2
WBGene00000929	0.0884576	0.4494	0.545901	no	glp1ncl1 / glp1	RNA-seq	dao-3
WBGene00000930	0.697107	0.0785	0.138122	no	glp1ncl1 / glp1	RNA-seq	dao-4
WBGene00000931	2.25282	5e-05	0.000190833	yes	glp1ncl1 / glp1	RNA-seq	dao-5
WBGene00000932	1.28321	0.08445	0.146506	no	glp1ncl1 / glp1	RNA-seq	dao-6
WBGene00000933	1.08444	5e-05	0.000190833	yes	glp1ncl1 / glp1	RNA-seq	dap-3
WBGene00000934	-0.165353	0.59415	0.678555	no	glp1ncl1 / glp1	RNA-seq	dat-1
WBGene00000936	-0.233133	0.3015	0.397864	no	glp1ncl1 / glp1	RNA-seq	dbl-1
WBGene00000937	0.0887553	0.51955	0.611677	no	glp1ncl1 / glp1	RNA-seq	dbr-1,mdt-18
WBGene00000938	-0.0762713	0.56815	0.655386	no	glp1ncl1 / glp1	RNA-seq	dcp-66
WBGene00000939	0.0227384	0.8541	0.892561	no	glp1ncl1 / glp1	RNA-seq	dcr-1
WBGene00000940	0.507298	0.02085	0.0451706	yes	glp1ncl1 / glp1	RNA-seq	dcs-1
WBGene00000941	0.422447	0.0005	0.00163084	yes	glp1ncl1 / glp1	RNA-seq	ddp-1
WBGene00000942	-0.216875	0.05035	0.0955828	no	glp1ncl1 / glp1	RNA-seq	deb-1
WBGene00000950	-0.275981	0.62795	0.708044	no	glp1ncl1 / glp1	RNA-seq	deg-1
WBGene00000951	-0.459592	0.151	0.232256	no	glp1ncl1 / glp1	RNA-seq	deg-3
WBGene00000952	0.12566	0.6966	0.766626	no	glp1ncl1 / glp1	RNA-seq	del-1
WBGene00000953	-0.0870826	0.81515	0.862466	no	glp1ncl1 / glp1	RNA-seq	del-2
WBGene00000955	0.239008	0.31935	0.416525	no	glp1ncl1 / glp1	RNA-seq	des-2
WBGene00000958	-0.259476	0.10325	0.17243	no	glp1ncl1 / glp1	RNA-seq	dgk-1
WBGene00000959	-0.298966	0.03475	0.0699233	no	glp1ncl1 / glp1	RNA-seq	dgk-2
WBGene00000961	0.131385	0.44615	0.542744	no	glp1ncl1 / glp1	RNA-seq	dgn-1
WBGene00000962	0.00417528	0.96975	0.977403	no	glp1ncl1 / glp1	RNA-seq	T21E12.3,dhc-1
WBGene00000963	-0.127233	0.2799	0.375059	no	glp1ncl1 / glp1	RNA-seq	dhp-1
WBGene00000964	0.643618	5e-05	0.000190833	yes	glp1ncl1 / glp1	RNA-seq	dhp-2
WBGene00000965	-0.0344366	0.82085	0.866906	no	glp1ncl1 / glp1	RNA-seq	dhs-1
WBGene00000966	-0.259109	0.0523	0.0986672	no	glp1ncl1 / glp1	RNA-seq	dhs-2
WBGene00000967	-0.534577	5e-05	0.000190833	yes	glp1ncl1 / glp1	RNA-seq	dhs-3
WBGene00000968	0.622245	0.0951	0.161199	no	glp1ncl1 / glp1	RNA-seq	dhs-4
WBGene00000969	0.35075	0.05265	0.099224	no	glp1ncl1 / glp1	RNA-seq	dhs-5
WBGene00000970	0.0448919	0.69195	0.762741	no	glp1ncl1 / glp1	RNA-seq	dhs-6
WBGene00000971	-0.461496	0.00385	0.0102746	yes	glp1ncl1 / glp1	RNA-seq	dhs-7
WBGene00000973	0.0237419	0.83585	0.878455	no	glp1ncl1 / glp1	RNA-seq	dhs-9
WBGene00000974	1.20306	0.1283	0.204555	no	glp1ncl1 / glp1	RNA-seq	dhs-11
WBGene00000975	-0.119735	0.3069	0.403453	no	glp1ncl1 / glp1	RNA-seq	dhs-12
WBGene00000976	-0.1011	0.45565	0.551911	no	glp1ncl1 / glp1	RNA-seq	dhs-13
WBGene00000977	0.0216007	0.8638	0.900016	no	glp1ncl1 / glp1	RNA-seq	dhs-14
WBGene00000978	-0.306093	0.2775	0.372481	no	glp1ncl1 / glp1	RNA-seq	dhs-15
WBGene00000979	1.74926	0.00055	0.00177921	yes	glp1ncl1 / glp1	RNA-seq	dhs-16
WBGene00000980	-0.0346369	0.92635	0.946189	no	glp1ncl1 / glp1	RNA-seq	dhs-17
WBGene00000981	-0.274439	0.0414	0.081118	no	glp1ncl1 / glp1	RNA-seq	dhs-18
WBGene00000982	-0.0350838	0.75745	0.816424	no	glp1ncl1 / glp1	RNA-seq	dhs-19
WBGene00000983	0.308416	0.02235	0.0479377	yes	glp1ncl1 / glp1	RNA-seq	F35B12.3,dhs-20
WBGene00000984	-0.00648116	0.9601	0.970526	no	glp1ncl1 / glp1	RNA-seq	dhs-21
WBGene00000985	-0.240331	0.038	0.0754425	no	glp1ncl1 / glp1	RNA-seq	dhs-22
WBGene00000986	0.423129	0.1473	0.227664	no	glp1ncl1 / glp1	RNA-seq	dhs-23
WBGene00000987	0.890286	5e-05	0.000190833	yes	glp1ncl1 / glp1	RNA-seq	dhs-24
WBGene00000988	-0.168203	0.1176	0.191177	no	glp1ncl1 / glp1	RNA-seq	dhs-25
WBGene00000989	-0.725014	5e-05	0.000190833	yes	glp1ncl1 / glp1	RNA-seq	dhs-26
WBGene00000990	-0.0738239	0.7061	0.774556	no	glp1ncl1 / glp1	RNA-seq	dhs-27
WBGene00000991	-0.157067	0.14025	0.219119	no	glp1ncl1 / glp1	RNA-seq	dhs-28
WBGene00000992	-0.272536	0.0974	0.164387	no	glp1ncl1 / glp1	RNA-seq	dhs-29
WBGene00000993	-0.207741	0.1138	0.186279	no	glp1ncl1 / glp1	RNA-seq	dhs-30
WBGene00000994	0.130136	0.41575	0.51339	no	glp1ncl1 / glp1	RNA-seq	dic-1
WBGene00000995	0.195633	0.43115	0.528455	no	glp1ncl1 / glp1	RNA-seq	die-1
WBGene00000996	-0.0489199	0.6651	0.73991	no	glp1ncl1 / glp1	RNA-seq	dif-1
WBGene00000998	-0.199807	0.0684	0.123329	no	glp1ncl1 / glp1	RNA-seq	dig-1
WBGene00001000	-0.121781	0.246	0.339314	no	glp1ncl1 / glp1	RNA-seq	dim-1
WBGene00001001	1.66077	5e-05	0.000190833	yes	glp1ncl1 / glp1	RNA-seq	dis-3
WBGene00001002	0.541647	0.0079	0.0194016	yes	glp1ncl1 / glp1	RNA-seq	div-1
WBGene00001005	0.0270507	0.80305	0.852916	no	glp1ncl1 / glp1	RNA-seq	dlc-1
WBGene00001006	-0.0561036	0.6457	0.723454	no	glp1ncl1 / glp1	RNA-seq	dlg-1
WBGene00001007	0.0482977	0.7187	0.784994	no	glp1ncl1 / glp1	RNA-seq	dli-1
WBGene00001008	-0.240245	0.03335	0.067524	no	glp1ncl1 / glp1	RNA-seq	dlk-1
WBGene00001016	2.56085	5e-05	0.000190833	yes	glp1ncl1 / glp1	RNA-seq	dna-2
WBGene00001017	-0.029442	0.81395	0.861565	no	glp1ncl1 / glp1	RNA-seq	dnc-1
WBGene00001018	0.116962	0.37645	0.47463	no	glp1ncl1 / glp1	RNA-seq	dnc-2
WBGene00001019	-0.180547	0.3114	0.408206	no	glp1ncl1 / glp1	RNA-seq	dnj-1
WBGene00001020	0.27736	0.11145	0.183145	no	glp1ncl1 / glp1	RNA-seq	dnj-2
WBGene00001021	0.169851	0.54655	0.636068	no	glp1ncl1 / glp1	RNA-seq	dnj-3
WBGene00001022	-0.173623	0.44165	0.538478	no	glp1ncl1 / glp1	RNA-seq	dnj-4
WBGene00001023	0.154118	0.2351	0.328164	no	glp1ncl1 / glp1	RNA-seq	dnj-5
WBGene00001025	-0.26738	0.01385	0.0317014	yes	glp1ncl1 / glp1	RNA-seq	dnj-7
WBGene00001026	0.0620526	0.60805	0.690718	no	glp1ncl1 / glp1	RNA-seq	dnj-8
WBGene00001027	0.0860725	0.49895	0.592626	no	glp1ncl1 / glp1	RNA-seq	dnj-9
WBGene00001028	0.293844	0.01895	0.0416047	yes	glp1ncl1 / glp1	RNA-seq	dnj-10
WBGene00001029	0.791908	5e-05	0.000190833	yes	glp1ncl1 / glp1	RNA-seq	dnj-11
WBGene00001030	0.224707	0.05885	0.108906	no	glp1ncl1 / glp1	RNA-seq	dnj-12
WBGene00001031	0.154442	0.1855	0.273179	no	glp1ncl1 / glp1	RNA-seq	dnj-13
WBGene00001032	-0.117623	0.47465	0.569873	no	glp1ncl1 / glp1	RNA-seq	dnj-14
WBGene00001033	-0.0695641	0.7006	0.769995	no	glp1ncl1 / glp1	RNA-seq	dnj-15
WBGene00001034	-0.0150431	0.8999	0.926651	no	glp1ncl1 / glp1	RNA-seq	dnj-16
WBGene00001035	0.610581	0.06505	0.118331	no	glp1ncl1 / glp1	RNA-seq	dnj-17
WBGene00001036	-0.0436555	0.7305	0.794603	no	glp1ncl1 / glp1	RNA-seq	T04A8.7,dnj-18
WBGene00001037	0.23297	0.02965	0.0610952	no	glp1ncl1 / glp1	RNA-seq	dnj-19
WBGene00001038	-0.0674169	0.54365	0.633435	no	glp1ncl1 / glp1	RNA-seq	dnj-20
WBGene00001039	0.113516	0.508	0.600995	no	glp1ncl1 / glp1	RNA-seq	dnj-21
WBGene00001040	0.0382243	0.86485	0.900862	no	glp1ncl1 / glp1	RNA-seq	dnj-22
WBGene00001041	0.0266362	0.8869	0.917244	no	glp1ncl1 / glp1	RNA-seq	dnj-23
WBGene00001042	-0.119905	0.41215	0.509817	no	glp1ncl1 / glp1	RNA-seq	dnj-24
WBGene00001043	-0.0655955	0.6092	0.691751	no	glp1ncl1 / glp1	RNA-seq	dnj-25
WBGene00001045	0.994813	5e-05	0.000190833	yes	glp1ncl1 / glp1	RNA-seq	dnj-27
WBGene00001046	0.229451	0.76035	0.818777	no	glp1ncl1 / glp1	RNA-seq	dnj-28
WBGene00001047	0.224427	0.08825	0.151825	no	glp1ncl1 / glp1	RNA-seq	dnj-29
WBGene00001048	0.0182863	0.9137	0.936887	no	glp1ncl1 / glp1	RNA-seq	dnj-30
WBGene00001049	0.480855	0.2083	0.299038	no	glp1ncl1 / glp1	RNA-seq	dog-1
WBGene00001050	0.336609	0.10105	0.169404	no	glp1ncl1 / glp1	RNA-seq	dom-3
WBGene00001051	0.250274	0.2612	0.354931	no	glp1ncl1 / glp1	RNA-seq	C09G4.4,cks-1,mes-6
WBGene00001052	-0.310776	0.2769	0.371853	no	glp1ncl1 / glp1	RNA-seq	dop-1
WBGene00001053	-0.221684	0.19915	0.288758	no	glp1ncl1 / glp1	RNA-seq	dop-2
WBGene00001054	-0.598943	0.0021	0.00597835	yes	glp1ncl1 / glp1	RNA-seq	dpf-1
WBGene00001055	-0.30914	0.00545	0.0139838	yes	glp1ncl1 / glp1	RNA-seq	dpf-2
WBGene00001056	-0.163037	0.1279	0.204088	no	glp1ncl1 / glp1	RNA-seq	dpf-3
WBGene00001057	0.392825	0.0522	0.0985114	no	glp1ncl1 / glp1	RNA-seq	dpf-4
WBGene00001058	0.0461516	0.66465	0.739518	no	glp1ncl1 / glp1	RNA-seq	dpf-5
WBGene00001059	-0.238183	0.1757	0.261662	no	glp1ncl1 / glp1	RNA-seq	dpf-6
WBGene00001060	0.5391	0.0006	0.00192594	yes	glp1ncl1 / glp1	RNA-seq	dpf-7
WBGene00001061	-0.0423759	0.85455	0.892906	no	glp1ncl1 / glp1	RNA-seq	dpl-1
WBGene00001064	0.672549	0.00385	0.0102746	yes	glp1ncl1 / glp1	RNA-seq	dpy-2
WBGene00001065	1.47823	0.00795	0.0195099	yes	glp1ncl1 / glp1	RNA-seq	dpy-3
WBGene00001066	0.435902	0.1529	0.234492	no	glp1ncl1 / glp1	RNA-seq	dpy-4
WBGene00001067	0.456943	0.00065	0.00207245	yes	glp1ncl1 / glp1	RNA-seq	dpy-5
WBGene00001068	0.0666803	0.66475	0.739606	no	glp1ncl1 / glp1	RNA-seq	dpy-6
WBGene00001069	0.59734	0.0805	0.140954	no	glp1ncl1 / glp1	RNA-seq	dpy-7
WBGene00001070	0.470968	0.34875	0.446673	no	glp1ncl1 / glp1	RNA-seq	dpy-8
WBGene00001071	0.632625	0.00405	0.0107462	yes	glp1ncl1 / glp1	RNA-seq	dpy-9
WBGene00001072	1.58684	5e-05	0.000190833	yes	glp1ncl1 / glp1	RNA-seq	dpy-10
WBGene00001073	0.443653	5e-05	0.000190833	yes	glp1ncl1 / glp1	RNA-seq	dpy-11
WBGene00001074	0.404266	0.00485	0.0126108	yes	glp1ncl1 / glp1	RNA-seq	dpy-13
WBGene00001075	6.67126	0.20935	0.300172	no	glp1ncl1 / glp1	RNA-seq	dpy-14
WBGene00001076	2.67196	5e-05	0.000190833	yes	glp1ncl1 / glp1	RNA-seq	dpy-17
WBGene00001077	0.888564	5e-05	0.000190833	yes	glp1ncl1 / glp1	RNA-seq	dpy-18
WBGene00001078	0.47621	0.02765	0.057544	no	glp1ncl1 / glp1	RNA-seq	dpy-19
WBGene00001080	-0.116059	0.4096	0.507312	no	glp1ncl1 / glp1	RNA-seq	dpy-21
WBGene00001081	-0.177796	0.09045	0.154912	no	glp1ncl1 / glp1	RNA-seq	dpy-22
WBGene00001082	-0.0240138	0.86055	0.897505	no	glp1ncl1 / glp1	RNA-seq	dpy-23
WBGene00001085	0.0344741	0.78215	0.836267	no	glp1ncl1 / glp1	RNA-seq	dpy-26
WBGene00001086	-0.0801118	0.46955	0.565071	no	glp1ncl1 / glp1	RNA-seq	dpy-27
WBGene00001087	0.322965	0.0572	0.106337	no	glp1ncl1 / glp1	RNA-seq	dpy-28
WBGene00001088	-0.132149	0.2731	0.367728	no	glp1ncl1 / glp1	RNA-seq	dpy-30
WBGene00001089	-0.0762351	0.51035	0.603134	no	glp1ncl1 / glp1	RNA-seq	dre-1
WBGene00001090	-0.124987	0.32095	0.418157	no	glp1ncl1 / glp1	RNA-seq	drh-1
WBGene00001092	0.31848	0.21895	0.310712	no	glp1ncl1 / glp1	RNA-seq	dro-1
WBGene00001093	-0.0687698	0.54635	0.635888	no	glp1ncl1 / glp1	RNA-seq	drp-1
WBGene00001094	0.759991	5e-05	0.000190833	yes	glp1ncl1 / glp1	RNA-seq	dars-1
WBGene00001095	1.02767	5e-05	0.000190833	yes	glp1ncl1 / glp1	RNA-seq	dars-2
WBGene00001099	-0.497105	5e-05	0.000190833	yes	glp1ncl1 / glp1	RNA-seq	dsc-4
WBGene00001101	-0.0779675	0.5531	0.641986	no	glp1ncl1 / glp1	RNA-seq	dsh-1
WBGene00001102	0.361624	0.09565	0.16196	no	glp1ncl1 / glp1	RNA-seq	dsh-2
WBGene00001103	1.36406	0.11045	0.181938	no	glp1ncl1 / glp1	RNA-seq	dsl-1
WBGene00001105	2.07888	0.00185	0.00533685	yes	glp1ncl1 / glp1	RNA-seq	dsl-3
WBGene00001109	-0.903276	0.11655	0.18982	no	glp1ncl1 / glp1	RNA-seq	dsl-7
WBGene00001110	0.42107	0.19025	0.278534	no	glp1ncl1 / glp1	RNA-seq	duo-1
WBGene00001112	-0.0041277	0.9813	0.98582	no	glp1ncl1 / glp1	RNA-seq	duo-3
WBGene00001113	0.458911	0.06935	0.124713	no	glp1ncl1 / glp1	RNA-seq	dur-1
WBGene00001115	-0.120673	0.6583	0.734069	no	glp1ncl1 / glp1	RNA-seq	dyb-1
WBGene00001116	-0.234389	0.18335	0.270636	no	glp1ncl1 / glp1	RNA-seq	dyc-1
WBGene00001117	0.303897	0.33965	0.437453	no	glp1ncl1 / glp1	RNA-seq	dyf-1
WBGene00001118	-0.0336586	0.9345	0.952146	no	glp1ncl1 / glp1	RNA-seq	dyf-2
WBGene00001119	-0.0616243	0.88755	0.917711	no	glp1ncl1 / glp1	RNA-seq	dyf-3
WBGene00001121	-0.0387595	0.96875	0.976692	no	glp1ncl1 / glp1	RNA-seq	dyf-5
WBGene00001122	-0.10765	0.71815	0.784561	no	glp1ncl1 / glp1	RNA-seq	dyf-6
WBGene00001123	-0.180543	0.53925	0.629536	no	glp1ncl1 / glp1	RNA-seq	dyf-7
WBGene00001130	-0.279359	0.0571	0.106189	no	glp1ncl1 / glp1	RNA-seq	dyn-1
WBGene00001131	0.0761363	0.702	0.771131	no	glp1ncl1 / glp1	RNA-seq	dys-1
WBGene00001132	0.168351	0.1626	0.246272	no	glp1ncl1 / glp1	RNA-seq	alp-1
WBGene00001133	0.762618	0.10565	0.175651	no	glp1ncl1 / glp1	RNA-seq	eat-2
WBGene00001134	0.308193	0.00485	0.0126108	yes	glp1ncl1 / glp1	RNA-seq	eat-3
WBGene00001135	0.10714	0.89565	0.923574	no	glp1ncl1 / glp1	RNA-seq	eat-4
WBGene00001136	0.659684	0.2557	0.348967	no	glp1ncl1 / glp1	RNA-seq	eat-5
WBGene00001137	-0.263371	0.01435	0.0326978	yes	glp1ncl1 / glp1	RNA-seq	eat-6
WBGene00001145	-0.038795	0.8305	0.874354	no	glp1ncl1 / glp1	RNA-seq	eat-16
WBGene00001147	-0.267895	0.08395	0.145828	no	glp1ncl1 / glp1	RNA-seq	eat-18,lev-10
WBGene00001148	-0.391704	0.0834	0.145045	no	glp1ncl1 / glp1	RNA-seq	eat-20
WBGene00001149	-0.252484	0.0152	0.0343759	yes	glp1ncl1 / glp1	RNA-seq	bcat-1
WBGene00001150	0.117734	0.4375	0.534467	no	glp1ncl1 / glp1	RNA-seq	ech-1.1
WBGene00001151	0.558883	5e-05	0.000190833	yes	glp1ncl1 / glp1	RNA-seq	ech-2,tag-30
WBGene00001152	-0.212039	0.2207	0.312669	no	glp1ncl1 / glp1	RNA-seq	ech-3
WBGene00001153	-0.261044	0.01675	0.037404	yes	glp1ncl1 / glp1	RNA-seq	ech-4
WBGene00001154	-0.0322355	0.81665	0.86369	no	glp1ncl1 / glp1	RNA-seq	ech-5
WBGene00001155	-0.269546	0.01335	0.0307098	yes	glp1ncl1 / glp1	RNA-seq	ech-6
WBGene00001156	-0.375859	0.0157	0.0353552	yes	glp1ncl1 / glp1	RNA-seq	ech-7
WBGene00001157	-0.193752	0.18455	0.272055	no	glp1ncl1 / glp1	RNA-seq	ech-8
WBGene00001158	0.427096	0.02645	0.055381	no	glp1ncl1 / glp1	RNA-seq	ech-9
WBGene00001159	-0.107803	0.6711	0.745074	no	glp1ncl1 / glp1	RNA-seq	eff-1
WBGene00001160	0.410815	0.051	0.0966294	no	glp1ncl1 / glp1	RNA-seq	efk-1
WBGene00001161	0.171493	0.49095	0.585173	no	glp1ncl1 / glp1	RNA-seq	efl-1
WBGene00001162	-0.313878	0.25325	0.346444	no	glp1ncl1 / glp1	RNA-seq	efl-2
WBGene00001163	-0.0992385	0.59815	0.682072	no	glp1ncl1 / glp1	RNA-seq	efn-2
WBGene00001164	0.0319908	0.8808	0.912694	no	glp1ncl1 / glp1	RNA-seq	efn-3
WBGene00001165	-0.207418	0.3969	0.494818	no	glp1ncl1 / glp1	RNA-seq	efn-4
WBGene00001166	0.375051	0.00065	0.00207245	yes	glp1ncl1 / glp1	RNA-seq	eftu-2
WBGene00001167	1.03223	5e-05	0.000190833	yes	glp1ncl1 / glp1	RNA-seq	eef-2
WBGene00001168	0.414509	0.0131	0.0302129	yes	glp1ncl1 / glp1	RNA-seq	eef-1A.1
WBGene00001169	0.939689	5e-05	0.000190833	yes	glp1ncl1 / glp1	RNA-seq	eef-1A.2
WBGene00001171	-0.371695	0.14515	0.225032	no	glp1ncl1 / glp1	RNA-seq	egl-2
WBGene00001172	-0.185362	0.0888	0.152609	no	glp1ncl1 / glp1	RNA-seq	egl-3
WBGene00001173	-0.204366	0.04885	0.0932136	no	glp1ncl1 / glp1	RNA-seq	egl-4
WBGene00001174	-0.326348	0.40895	0.506675	no	glp1ncl1 / glp1	RNA-seq	egl-5
WBGene00001175	-0.162002	0.55455	0.643256	no	glp1ncl1 / glp1	RNA-seq	egl-6
WBGene00001177	-0.199867	0.06415	0.11697	no	glp1ncl1 / glp1	RNA-seq	egl-8
WBGene00001178	-0.228619	0.15545	0.23755	no	glp1ncl1 / glp1	RNA-seq	egl-9
WBGene00001179	-0.274064	0.03605	0.0721195	no	glp1ncl1 / glp1	RNA-seq	egl-10
WBGene00001182	-0.537662	0.0703	0.12611	no	glp1ncl1 / glp1	RNA-seq	egl-13
WBGene00001184	0.36505	0.0057	0.0145477	yes	glp1ncl1 / glp1	RNA-seq	egl-15
WBGene00001186	0.158308	0.6354	0.714564	no	glp1ncl1 / glp1	RNA-seq	egl-18
WBGene00001187	-0.105398	0.3951	0.493076	no	glp1ncl1 / glp1	RNA-seq	egl-19
WBGene00001188	-0.133854	0.55785	0.646193	no	glp1ncl1 / glp1	RNA-seq	egl-20
WBGene00001189	-0.235967	0.0334	0.0676024	no	glp1ncl1 / glp1	RNA-seq	egl-21
WBGene00001190	-0.0805078	0.82635	0.871133	no	glp1ncl1 / glp1	RNA-seq	egl-23
WBGene00001193	-0.133519	0.51735	0.609605	no	glp1ncl1 / glp1	RNA-seq	egl-26
WBGene00001194	-0.0760733	0.54635	0.635888	no	glp1ncl1 / glp1	RNA-seq	egl-27
WBGene00001196	-0.387795	0.0304	0.0624188	no	glp1ncl1 / glp1	RNA-seq	egl-30
WBGene00001202	-0.289851	0.22285	0.315076	no	glp1ncl1 / glp1	RNA-seq	egl-36
WBGene00001204	1.08441	0.0161	0.03614	yes	glp1ncl1 / glp1	RNA-seq	egl-38,spch-1
WBGene00001207	-0.213781	0.44305	0.539812	no	glp1ncl1 / glp1	RNA-seq	egl-43
WBGene00001208	-0.0713945	0.64575	0.723493	no	glp1ncl1 / glp1	RNA-seq	egl-44
WBGene00001209	0.599746	5e-05	0.000190833	yes	glp1ncl1 / glp1	RNA-seq	egl-45
WBGene00001211	-0.0398808	0.94025	0.956287	no	glp1ncl1 / glp1	RNA-seq	egl-47
WBGene00001214	1.44766	5e-05	0.000190833	yes	glp1ncl1 / glp1	RNA-seq	ego-1
WBGene00001215	-0.054006	0.7597	0.818276	no	glp1ncl1 / glp1	RNA-seq	ego-2
WBGene00001224	0.0735561	0.7093	0.777184	no	glp1ncl1 / glp1	RNA-seq	ehs-1
WBGene00001225	0.568063	5e-05	0.000190833	yes	glp1ncl1 / glp1	RNA-seq	eif-3.B
WBGene00001226	0.616351	5e-05	0.000190833	yes	glp1ncl1 / glp1	RNA-seq	eif-3.C
WBGene00001227	0.763536	5e-05	0.000190833	yes	glp1ncl1 / glp1	RNA-seq	eif-3.D
WBGene00001228	0.778728	5e-05	0.000190833	yes	glp1ncl1 / glp1	RNA-seq	eif-3.E
WBGene00001229	1.07668	5e-05	0.000190833	yes	glp1ncl1 / glp1	RNA-seq	eif-3.F
WBGene00001230	0.907848	5e-05	0.000190833	yes	glp1ncl1 / glp1	RNA-seq	eif-3.G
WBGene00001231	0.752947	5e-05	0.000190833	yes	glp1ncl1 / glp1	RNA-seq	eif-3.H
WBGene00001232	0.787345	5e-05	0.000190833	yes	glp1ncl1 / glp1	RNA-seq	eif-3.I
WBGene00001233	0.925254	5e-05	0.000190833	yes	glp1ncl1 / glp1	RNA-seq	eif-3.K
WBGene00001234	1.65798	5e-05	0.000190833	yes	glp1ncl1 / glp1	RNA-seq	eif-6
WBGene00001235	0.0815907	0.57915	0.66525	no	glp1ncl1 / glp1	RNA-seq	elb-1
WBGene00001236	0.0231225	0.8758	0.908958	no	glp1ncl1 / glp1	RNA-seq	elc-1
WBGene00001239	-0.272399	0.0078	0.0191861	yes	glp1ncl1 / glp1	RNA-seq	elo-1
WBGene00001240	-0.342574	0.0009	0.00278523	yes	glp1ncl1 / glp1	RNA-seq	elo-2
WBGene00001241	-0.233854	0.05205	0.098271	no	glp1ncl1 / glp1	RNA-seq	elo-3
WBGene00001242	-0.424654	0.21025	0.301136	no	glp1ncl1 / glp1	RNA-seq	elo-4
WBGene00001243	-0.505008	5e-05	0.000190833	yes	glp1ncl1 / glp1	RNA-seq	elo-5
WBGene00001244	-0.697998	5e-05	0.000190833	yes	glp1ncl1 / glp1	RNA-seq	elo-6
WBGene00001247	-0.0619317	0.6746	0.74807	no	glp1ncl1 / glp1	RNA-seq	elo-9
WBGene00001248	-0.289358	0.02805	0.0582573	no	glp1ncl1 / glp1	RNA-seq	elp-1
WBGene00001249	-0.0964575	0.7103	0.778063	no	glp1ncl1 / glp1	RNA-seq	elt-1
WBGene00001250	-0.36586	0.00845	0.0205837	yes	glp1ncl1 / glp1	RNA-seq	elt-2
WBGene00001251	-0.392898	0.0444	0.0860579	no	glp1ncl1 / glp1	RNA-seq	elt-3
WBGene00001252	-1.16059	0.0496	0.0943934	no	glp1ncl1 / glp1	RNA-seq	elt-4
WBGene00001253	0.170942	0.5852	0.670662	no	glp1ncl1 / glp1	RNA-seq	elt-6
WBGene00001258	0.160874	0.16845	0.253147	no	glp1ncl1 / glp1	RNA-seq	emb-4
WBGene00001259	0.132348	0.21845	0.310153	no	glp1ncl1 / glp1	RNA-seq	emb-5
WBGene00001262	-0.173895	0.18615	0.273965	no	glp1ncl1 / glp1	RNA-seq	emb-8
WBGene00001263	0.102978	0.39005	0.488094	no	glp1ncl1 / glp1	RNA-seq	emb-9
WBGene00001281	0.106405	0.558	0.646309	no	glp1ncl1 / glp1	RNA-seq	emb-27
WBGene00001284	0.0789975	0.5319	0.622895	no	glp1ncl1 / glp1	RNA-seq	emb-30
WBGene00001303	-0.0604634	0.5585	0.646744	no	glp1ncl1 / glp1	RNA-seq	emo-1
WBGene00001309	0.285371	0.1988	0.288357	no	glp1ncl1 / glp1	RNA-seq	emr-1
WBGene00001320	0.628038	0.0992	0.166884	no	glp1ncl1 / glp1	RNA-seq	ent-1
WBGene00001324	0.132253	0.49845	0.592178	no	glp1ncl1 / glp1	RNA-seq	eor-1
WBGene00001325	-0.331625	0.10095	0.169267	no	glp1ncl1 / glp1	RNA-seq	eor-2
WBGene00001328	0.34786	0.00155	0.00455463	yes	glp1ncl1 / glp1	RNA-seq	epi-1
WBGene00001329	-0.140557	0.2571	0.350463	no	glp1ncl1 / glp1	RNA-seq	epn-1
WBGene00001330	-0.19221	0.1384	0.216813	no	glp1ncl1 / glp1	RNA-seq	eps-8
WBGene00001331	0.177052	0.09765	0.164734	no	glp1ncl1 / glp1	RNA-seq	erd-2
WBGene00001332	0.0832289	0.684	0.755969	no	glp1ncl1 / glp1	RNA-seq	eri-1
WBGene00001333	-0.113526	0.29025	0.386053	no	glp1ncl1 / glp1	RNA-seq	erm-1
WBGene00001334	0.120544	0.3205	0.417691	no	glp1ncl1 / glp1	RNA-seq	ero-1
WBGene00001335	0.0197727	0.90715	0.932109	no	glp1ncl1 / glp1	RNA-seq	erp-1
WBGene00001336	0.821548	5e-05	0.000190833	yes	glp1ncl1 / glp1	RNA-seq	qars-1
WBGene00001337	0.851596	5e-05	0.000190833	yes	glp1ncl1 / glp1	RNA-seq	ears-1
WBGene00001338	0.00424424	0.9805	0.985243	no	glp1ncl1 / glp1	RNA-seq	ears-2
WBGene00001340	-0.17837	0.11935	0.193199	no	glp1ncl1 / glp1	RNA-seq	etr-1
WBGene00001345	-0.272049	0.37985	0.477988	no	glp1ncl1 / glp1	RNA-seq	fos-1
WBGene00001352	0.131892	0.29105	0.386904	no	glp1ncl1 / glp1	RNA-seq	evl-14
WBGene00001358	0.103845	0.6871	0.758571	no	glp1ncl1 / glp1	RNA-seq	evl-20
WBGene00001365	0.00631248	0.97245	0.97936	no	glp1ncl1 / glp1	RNA-seq	exc-4
WBGene00001366	0.0502385	0.70665	0.775001	no	glp1ncl1 / glp1	RNA-seq	exc-5
WBGene00001368	-0.26686	0.24955	0.342735	no	glp1ncl1 / glp1	RNA-seq	exc-7
WBGene00001371	-0.0372884	0.7911	0.843447	no	glp1ncl1 / glp1	RNA-seq	exl-1
WBGene00001372	1.046	0.00625	0.0157824	yes	glp1ncl1 / glp1	RNA-seq	exo-3
WBGene00001373	-0.546533	0.3391	0.436904	no	glp1ncl1 / glp1	RNA-seq	exp-1
WBGene00001374	0.228372	0.9077	0.932496	no	glp1ncl1 / glp1	RNA-seq	exp-2
WBGene00001377	0.282418	0.5007	0.594273	no	glp1ncl1 / glp1	RNA-seq	eya-1
WBGene00001385	0.0480858	0.64675	0.724353	no	glp1ncl1 / glp1	RNA-seq	far-1
WBGene00001386	-0.132757	0.34845	0.446376	no	glp1ncl1 / glp1	RNA-seq	far-2
WBGene00001387	-0.000963802	0.99475	0.995809	no	glp1ncl1 / glp1	RNA-seq	far-3
WBGene00001388	0.165939	0.61995	0.701055	no	glp1ncl1 / glp1	RNA-seq	far-4
WBGene00001389	-0.287592	0.44325	0.539992	no	glp1ncl1 / glp1	RNA-seq	far-5
WBGene00001390	0.16887	0.10405	0.173479	no	glp1ncl1 / glp1	RNA-seq	far-6
WBGene00001391	0.108191	0.6478	0.72518	no	glp1ncl1 / glp1	RNA-seq	far-7
WBGene00001392	-0.165342	0.11485	0.187592	no	glp1ncl1 / glp1	RNA-seq	far-8
WBGene00001393	0.282732	0.00705	0.0175523	yes	glp1ncl1 / glp1	RNA-seq	fat-1
WBGene00001394	0.11597	0.37875	0.47689	no	glp1ncl1 / glp1	RNA-seq	fat-2
WBGene00001395	0.827019	5e-05	0.000190833	yes	glp1ncl1 / glp1	RNA-seq	fat-3
WBGene00001396	-0.0345658	0.74445	0.80588	no	glp1ncl1 / glp1	RNA-seq	fat-4
WBGene00001397	-0.439954	0.0001	0.000367464	yes	glp1ncl1 / glp1	RNA-seq	fat-5
WBGene00001398	-0.214881	0.04425	0.085809	no	glp1ncl1 / glp1	RNA-seq	fat-6
WBGene00001399	0.402349	0.02365	0.0503067	no	glp1ncl1 / glp1	RNA-seq	fat-7
WBGene00001402	2.77993	5e-05	0.000190833	yes	glp1ncl1 / glp1	RNA-seq	fbf-2
WBGene00001403	0.0330585	0.87655	0.909512	no	glp1ncl1 / glp1	RNA-seq	fbl-1
WBGene00001404	-0.182079	0.0832	0.144773	no	glp1ncl1 / glp1	RNA-seq	fbp-1
WBGene00001405	-0.0320291	0.7714	0.827696	no	glp1ncl1 / glp1	RNA-seq	fce-1
WBGene00001406	0.0168465	0.92895	0.948089	no	glp1ncl1 / glp1	RNA-seq	fce-2
WBGene00001410	-0.299526	0.1506	0.231776	no	glp1ncl1 / glp1	RNA-seq	feh-1
WBGene00001411	-0.015061	0.90765	0.932456	no	glp1ncl1 / glp1	RNA-seq	fem-1
WBGene00001412	0.208329	0.14955	0.230453	no	glp1ncl1 / glp1	RNA-seq	fem-2
WBGene00001413	1.77657	0.00835	0.0203674	yes	glp1ncl1 / glp1	RNA-seq	fem-3
WBGene00001423	3.0095	5e-05	0.000190833	yes	glp1ncl1 / glp1	RNA-seq	fib-1
WBGene00001425	-0.131438	0.55285	0.641764	no	glp1ncl1 / glp1	RNA-seq	fis-2
WBGene00001426	-0.0779199	0.49345	0.587499	no	glp1ncl1 / glp1	RNA-seq	fkb-1
WBGene00001427	0.268467	0.0128	0.0296135	yes	glp1ncl1 / glp1	RNA-seq	fkb-2
WBGene00001428	0.168709	0.13485	0.212415	no	glp1ncl1 / glp1	RNA-seq	fkb-3
WBGene00001429	1.79776	5e-05	0.000190833	yes	glp1ncl1 / glp1	RNA-seq	fkb-4
WBGene00001430	1.43005	5e-05	0.000190833	yes	glp1ncl1 / glp1	RNA-seq	fkb-5
WBGene00001431	0.278771	0.01825	0.0402765	yes	glp1ncl1 / glp1	RNA-seq	fkb-6
WBGene00001432	1.01322	0.00705	0.0175523	yes	glp1ncl1 / glp1	RNA-seq	fkb-7
WBGene00001433	0.279188	0.021	0.0454581	yes	glp1ncl1 / glp1	RNA-seq	fkb-8
WBGene00001438	0.101379	0.8085	0.857208	no	glp1ncl1 / glp1	RNA-seq	fkh-6
WBGene00001439	-0.345198	0.14615	0.226262	no	glp1ncl1 / glp1	RNA-seq	fkh-7
WBGene00001440	0.317942	0.37025	0.46847	no	glp1ncl1 / glp1	RNA-seq	fkh-8
WBGene00001441	-0.38952	0.1228	0.197558	no	glp1ncl1 / glp1	RNA-seq	fkh-9
WBGene00001442	-0.0756852	0.9084	0.932987	no	glp1ncl1 / glp1	RNA-seq	fkh-10
WBGene00001443	0.0277025	0.81345	0.861143	no	glp1ncl1 / glp1	RNA-seq	fli-1
WBGene00001444	-0.269458	0.05685	0.105802	no	glp1ncl1 / glp1	RNA-seq	flp-1
WBGene00001445	-0.269764	0.78825	0.841117	no	glp1ncl1 / glp1	RNA-seq	flp-2
WBGene00001446	-0.0873089	0.89335	0.921892	no	glp1ncl1 / glp1	RNA-seq	flp-3
WBGene00001447	-0.0152804	0.94655	0.96083	no	glp1ncl1 / glp1	RNA-seq	flp-4
WBGene00001448	-0.0475016	0.78195	0.836127	no	glp1ncl1 / glp1	RNA-seq	flp-5
WBGene00001449	0.00961633	0.94325	0.958421	no	glp1ncl1 / glp1	RNA-seq	flp-6
WBGene00001450	0.0371872	0.8411	0.882539	no	glp1ncl1 / glp1	RNA-seq	flp-7
WBGene00001451	-0.320577	0.0954	0.161612	no	glp1ncl1 / glp1	RNA-seq	flp-8
WBGene00001452	0.124138	0.3176	0.41469	no	glp1ncl1 / glp1	RNA-seq	flp-9
WBGene00001453	0.0294093	0.90565	0.931	no	glp1ncl1 / glp1	RNA-seq	flp-10
WBGene00001454	-0.0849856	0.71195	0.77942	no	glp1ncl1 / glp1	RNA-seq	flp-11
WBGene00001455	0.0168278	0.9039	0.929682	no	glp1ncl1 / glp1	RNA-seq	flp-12
WBGene00001456	-0.00417799	0.98185	0.986233	no	glp1ncl1 / glp1	RNA-seq	flp-13
WBGene00001457	-0.176622	0.17805	0.264413	no	glp1ncl1 / glp1	RNA-seq	flp-14
WBGene00001458	-0.464514	0.06125	0.112583	no	glp1ncl1 / glp1	RNA-seq	flp-15
WBGene00001459	-0.39482	0.05075	0.0962325	no	glp1ncl1 / glp1	RNA-seq	flp-16
WBGene00001460	-0.307794	0.0752	0.13334	no	glp1ncl1 / glp1	RNA-seq	flp-17
WBGene00001461	-0.0222655	0.8699	0.904591	no	glp1ncl1 / glp1	RNA-seq	flp-18
WBGene00001462	-0.195396	0.3588	0.456924	no	glp1ncl1 / glp1	RNA-seq	flp-19
WBGene00001463	0.0581404	0.81835	0.864956	no	glp1ncl1 / glp1	RNA-seq	flp-20
WBGene00001464	-0.168444	0.57895	0.665063	no	glp1ncl1 / glp1	RNA-seq	flp-21
WBGene00001465	-0.353955	0.1495	0.23039	no	glp1ncl1 / glp1	RNA-seq	flr-1
WBGene00001466	-0.338217	0.5286	0.619905	no	glp1ncl1 / glp1	RNA-seq	flr-2
WBGene00001468	0.0495371	0.83715	0.879506	no	glp1ncl1 / glp1	RNA-seq	flr-4
WBGene00001470	-0.00126058	0.99325	0.994668	no	glp1ncl1 / glp1	RNA-seq	baz-2
WBGene00001475	-0.118064	0.4446	0.541272	no	glp1ncl1 / glp1	RNA-seq	fmi-1
WBGene00001476	0.172586	0.459	0.555125	no	glp1ncl1 / glp1	RNA-seq	fmo-1
WBGene00001477	1.51149	0.00035	0.00117477	yes	glp1ncl1 / glp1	RNA-seq	fmo-2
WBGene00001478	0.202844	0.119	0.192816	no	glp1ncl1 / glp1	RNA-seq	fmo-3
WBGene00001479	0.198847	0.08705	0.150156	no	glp1ncl1 / glp1	RNA-seq	fmo-4
WBGene00001480	0.0226495	0.8742	0.907748	no	glp1ncl1 / glp1	RNA-seq	fmo-5
WBGene00001481	0.230655	0.68895	0.760157	no	glp1ncl1 / glp1	RNA-seq	fog-1
WBGene00001482	0.633793	0.19775	0.287151	no	glp1ncl1 / glp1	RNA-seq	fog-2
WBGene00001484	-0.244492	0.3618	0.459973	no	glp1ncl1 / glp1	RNA-seq	fox-1
WBGene00001485	0.151759	0.4148	0.512482	no	glp1ncl1 / glp1	RNA-seq	fre-1
WBGene00001486	0.0646696	0.7943	0.845963	no	glp1ncl1 / glp1	RNA-seq	frh-1
WBGene00001488	-0.175431	0.2437	0.336989	no	glp1ncl1 / glp1	RNA-seq	frm-1
WBGene00001489	-0.16551	0.1858	0.273535	no	glp1ncl1 / glp1	RNA-seq	frm-2
WBGene00001490	-0.0550617	0.7698	0.826441	no	glp1ncl1 / glp1	RNA-seq	frm-3
WBGene00001491	-0.407226	0.0004	0.00132807	yes	glp1ncl1 / glp1	RNA-seq	frm-4
WBGene00001492	-0.426276	0.00925	0.0222885	yes	glp1ncl1 / glp1	RNA-seq	frm-5.1
WBGene00001493	-0.108417	0.3499	0.447853	no	glp1ncl1 / glp1	RNA-seq	frm-7
WBGene00001494	-0.170328	0.29225	0.388158	no	glp1ncl1 / glp1	RNA-seq	frm-8
WBGene00001495	-0.0989716	0.68275	0.754937	no	glp1ncl1 / glp1	RNA-seq	frm-9
WBGene00001496	0.027051	0.81865	0.86517	no	glp1ncl1 / glp1	RNA-seq	frm-10
WBGene00001497	0.867187	5e-05	0.000190833	yes	glp1ncl1 / glp1	RNA-seq	fars-1
WBGene00001498	1.14919	5e-05	0.000190833	yes	glp1ncl1 / glp1	RNA-seq	fars-3
WBGene00001499	0.0951887	0.6418	0.720062	no	glp1ncl1 / glp1	RNA-seq	fsn-1
WBGene00001500	0.0799586	0.68875	0.759986	no	glp1ncl1 / glp1	RNA-seq	ftn-1
WBGene00001501	-0.328355	0.0014	0.00415395	yes	glp1ncl1 / glp1	RNA-seq	ftn-2
WBGene00001502	-0.13665	0.19055	0.278881	no	glp1ncl1 / glp1	RNA-seq	ftt-2
WBGene00001503	0.0506661	0.6346	0.713891	no	glp1ncl1 / glp1	RNA-seq	fum-1
WBGene00001505	0.00823089	0.95025	0.96347	no	glp1ncl1 / glp1	RNA-seq	fut-1
WBGene00001506	0.498311	0.36505	0.463257	no	glp1ncl1 / glp1	RNA-seq	fut-2
WBGene00001507	-0.49118	0.1311	0.208128	no	glp1ncl1 / glp1	RNA-seq	fut-4
WBGene00001508	0.0597979	0.63085	0.710601	no	glp1ncl1 / glp1	RNA-seq	fut-8
WBGene00001509	0.0995084	0.394	0.491959	no	glp1ncl1 / glp1	RNA-seq	fzo-1
WBGene00001510	-0.304681	0.05115	0.0968407	no	glp1ncl1 / glp1	RNA-seq	fzr-1
WBGene00001511	2.053	5e-05	0.000190833	yes	glp1ncl1 / glp1	RNA-seq	fzy-1
WBGene00001512	-0.0079155	0.9775	0.983095	no	glp1ncl1 / glp1	RNA-seq	gab-1
WBGene00001513	0.156474	0.2481	0.341325	no	glp1ncl1 / glp1	RNA-seq	gad-1
WBGene00001514	4.0314	0.16405	0.247886	no	glp1ncl1 / glp1	RNA-seq	xnd-1
WBGene00001515	0.248463	0.25645	0.349773	no	glp1ncl1 / glp1	RNA-seq	gap-1
WBGene00001516	-0.23879	0.05555	0.103766	no	glp1ncl1 / glp1	RNA-seq	gap-2
WBGene00001517	0.199668	0.4276	0.525029	no	glp1ncl1 / glp1	RNA-seq	gar-1
WBGene00001518	-0.288927	0.142	0.221199	no	glp1ncl1 / glp1	RNA-seq	gar-2
WBGene00001519	-0.207535	0.27565	0.370481	no	glp1ncl1 / glp1	RNA-seq	gar-3
WBGene00001520	-0.100369	0.3843	0.482407	no	glp1ncl1 / glp1	RNA-seq	gas-1
WBGene00001522	0.343945	0.03635	0.0726349	no	glp1ncl1 / glp1	RNA-seq	gbh-1
WBGene00001523	0.343276	0.34235	0.440192	no	glp1ncl1 / glp1	RNA-seq	gbh-2
WBGene00001526	-0.219637	0.1113	0.182944	no	glp1ncl1 / glp1	RNA-seq	gck-1
WBGene00001527	-0.228027	0.02795	0.0580774	no	glp1ncl1 / glp1	RNA-seq	gcs-1
WBGene00001536	-0.237823	0.2783	0.373341	no	glp1ncl1 / glp1	RNA-seq	gcy-9
WBGene00001537	0.0328418	0.8447	0.885278	no	glp1ncl1 / glp1	RNA-seq	gcy-11
WBGene00001538	-0.15767	0.1402	0.219058	no	glp1ncl1 / glp1	RNA-seq	gcy-12
WBGene00001541	0.121465	0.63175	0.711402	no	glp1ncl1 / glp1	RNA-seq	gcy-15
WBGene00001543	-0.312291	0.33685	0.43459	no	glp1ncl1 / glp1	RNA-seq	gcy-18
WBGene00001546	-0.296641	0.2012	0.291079	no	glp1ncl1 / glp1	RNA-seq	gcy-21
WBGene00001553	0.498985	0.7055	0.774038	no	glp1ncl1 / glp1	RNA-seq	gcy-33
WBGene00001555	-0.131355	0.88335	0.914581	no	glp1ncl1 / glp1	RNA-seq	gcy-35
WBGene00001557	-0.539939	0.16435	0.248252	no	glp1ncl1 / glp1	RNA-seq	gcy-37
WBGene00001558	0.101529	0.34625	0.444179	no	glp1ncl1 / glp1	RNA-seq	gdi-1
WBGene00001559	-0.249946	0.0565	0.105246	no	glp1ncl1 / glp1	RNA-seq	gei-1
WBGene00001560	-0.368777	0.1471	0.22742	no	glp1ncl1 / glp1	RNA-seq	gei-3,nhr-27
WBGene00001561	-0.151129	0.48355	0.578178	no	glp1ncl1 / glp1	RNA-seq	gei-4
WBGene00001562	-0.141599	0.85625	0.894205	no	glp1ncl1 / glp1	RNA-seq	lin-66
WBGene00001563	0.068114	0.6206	0.701635	no	glp1ncl1 / glp1	RNA-seq	gei-6
WBGene00001564	-0.0238168	0.8227	0.868319	no	glp1ncl1 / glp1	RNA-seq	icl-1
WBGene00001565	-0.266926	0.0391	0.0772999	no	glp1ncl1 / glp1	RNA-seq	gei-8
WBGene00001566	0.486962	0.00025	0.000862343	yes	glp1ncl1 / glp1	RNA-seq	acdh-13
WBGene00001568	-0.127655	0.6109	0.693205	no	glp1ncl1 / glp1	RNA-seq	mdt-31,snpc-4
WBGene00001569	-0.269738	0.19095	0.279355	no	glp1ncl1 / glp1	RNA-seq	meg-3
WBGene00001570	0.00366694	0.99005	0.992308	no	glp1ncl1 / glp1	RNA-seq	gei-13
WBGene00001571	0.651544	0.04945	0.0941573	no	glp1ncl1 / glp1	RNA-seq	gei-14
WBGene00001572	-0.283314	0.5285	0.619814	no	glp1ncl1 / glp1	RNA-seq	gei-15
WBGene00001574	0.067265	0.5735	0.66023	no	glp1ncl1 / glp1	RNA-seq	gei-17
WBGene00001575	-0.596003	0.4823	0.577017	no	glp1ncl1 / glp1	RNA-seq	gei-18
WBGene00001577	0.216181	0.2805	0.375686	no	glp1ncl1 / glp1	RNA-seq	gem-4
WBGene00001578	-0.431753	5e-05	0.000190833	yes	glp1ncl1 / glp1	RNA-seq	ges-1
WBGene00001579	-0.0115519	0.9267	0.946454	no	glp1ncl1 / glp1	RNA-seq	gex-2
WBGene00001580	0.0563034	0.63575	0.714853	no	glp1ncl1 / glp1	RNA-seq	gex-3
WBGene00001581	-0.380689	0.00025	0.000862343	yes	glp1ncl1 / glp1	RNA-seq	gfi-1
WBGene00001582	-0.0221511	0.84835	0.888118	no	glp1ncl1 / glp1	RNA-seq	gfi-2
WBGene00001583	0.118017	0.51315	0.605743	no	glp1ncl1 / glp1	RNA-seq	gfi-3
WBGene00001584	0.186122	0.42355	0.521054	no	glp1ncl1 / glp1	RNA-seq	hmg-5,nrde-4
WBGene00001585	-0.0096102	0.9662	0.974844	no	glp1ncl1 / glp1	RNA-seq	gfl-1
WBGene00001586	0.589816	0.6587	0.734416	no	glp1ncl1 / glp1	RNA-seq	ggr-1
WBGene00001587	0.372489	0.30645	0.402982	no	glp1ncl1 / glp1	RNA-seq	ggr-2
WBGene00001588	0.0440671	0.8845	0.915491	no	glp1ncl1 / glp1	RNA-seq	ggr-3
WBGene00001589	-0.0209339	0.88015	0.912217	no	glp1ncl1 / glp1	RNA-seq	gip-1
WBGene00001590	0.319905	0.10755	0.178198	no	glp1ncl1 / glp1	RNA-seq	C45G3.3
WBGene00001591	0.33322	0.00685	0.0171139	yes	glp1ncl1 / glp1	RNA-seq	glc-1
WBGene00001592	-0.0798745	0.7322	0.796006	no	glp1ncl1 / glp1	RNA-seq	glc-2
WBGene00001593	-0.330362	0.3813	0.47939	no	glp1ncl1 / glp1	RNA-seq	glc-3
WBGene00001594	-0.123539	0.5224	0.614256	no	glp1ncl1 / glp1	RNA-seq	glc-4
WBGene00001595	2.16902	0.00015	0.000536873	yes	glp1ncl1 / glp1	RNA-seq	gld-1
WBGene00001596	0.01988	0.8859	0.9165	no	glp1ncl1 / glp1	RNA-seq	gld-2
WBGene00001597	4.06437	0.00025	0.000862343	yes	glp1ncl1 / glp1	RNA-seq	gld-3
WBGene00001598	1.31225	5e-05	0.000190833	yes	glp1ncl1 / glp1	RNA-seq	glh-1
WBGene00001600	1.27447	0.01985	0.0432992	yes	glp1ncl1 / glp1	RNA-seq	glh-3
WBGene00001602	-0.0476246	0.7154	0.782292	no	glp1ncl1 / glp1	RNA-seq	gln-1
WBGene00001604	-0.526033	5e-05	0.000190833	yes	glp1ncl1 / glp1	RNA-seq	gln-3
WBGene00001606	2.82519	5e-05	0.000190833	yes	glp1ncl1 / glp1	RNA-seq	gln-5
WBGene00001607	4.90456	0.0003	0.0010199	yes	glp1ncl1 / glp1	RNA-seq	gln-6
WBGene00001608	0.556154	0.05105	0.0966854	no	glp1ncl1 / glp1	RNA-seq	R07B1.8
WBGene00001609	0.118068	0.44145	0.538285	no	glp1ncl1 / glp1	RNA-seq	glp-1
WBGene00001612	-0.209987	0.4719	0.567289	no	glp1ncl1 / glp1	RNA-seq	glr-1
WBGene00001613	-0.118944	0.6808	0.753293	no	glp1ncl1 / glp1	RNA-seq	glr-2
WBGene00001615	0.0577024	0.95055	0.963694	no	glp1ncl1 / glp1	RNA-seq	glr-4
WBGene00001616	-0.207332	0.2601	0.353738	no	glp1ncl1 / glp1	RNA-seq	glr-5
WBGene00001617	-0.0217595	0.89345	0.921961	no	glp1ncl1 / glp1	RNA-seq	glr-6
WBGene00001620	-0.0616191	0.55395	0.642727	no	glp1ncl1 / glp1	RNA-seq	glt-1
WBGene00001621	-0.278937	0.164	0.247829	no	glp1ncl1 / glp1	RNA-seq	glt-3
WBGene00001622	-0.00119763	0.9954	0.996281	no	glp1ncl1 / glp1	RNA-seq	glt-4
WBGene00001623	-0.230645	0.35875	0.456874	no	glp1ncl1 / glp1	RNA-seq	glt-5
WBGene00001624	0.178505	0.90255	0.928666	no	glp1ncl1 / glp1	RNA-seq	glt-6
WBGene00001625	-0.327106	0.3177	0.414796	no	glp1ncl1 / glp1	RNA-seq	glt-7
WBGene00001626	-0.348731	0.4355	0.532615	no	glp1ncl1 / glp1	RNA-seq	gly-1
WBGene00001627	-0.394113	0.0049	0.0127275	yes	glp1ncl1 / glp1	RNA-seq	gly-2
WBGene00001628	0.0794246	0.4958	0.589715	no	glp1ncl1 / glp1	RNA-seq	gly-3
WBGene00001629	-0.300584	0.0078	0.0191861	yes	glp1ncl1 / glp1	RNA-seq	gly-4
WBGene00001630	-0.0460019	0.67255	0.746325	no	glp1ncl1 / glp1	RNA-seq	gly-5
WBGene00001631	-0.0041437	0.9753	0.981482	no	glp1ncl1 / glp1	RNA-seq	gly-6
WBGene00001632	0.202277	0.0619	0.113546	no	glp1ncl1 / glp1	RNA-seq	gly-7
WBGene00001633	0.0180667	0.86125	0.898044	no	glp1ncl1 / glp1	RNA-seq	gly-8
WBGene00001635	0.467942	5e-05	0.000190833	yes	glp1ncl1 / glp1	RNA-seq	gly-10,rpl-18
WBGene00001636	0.207884	0.1635	0.247323	no	glp1ncl1 / glp1	RNA-seq	gly-11
WBGene00001637	0.154381	0.42875	0.526134	no	glp1ncl1 / glp1	RNA-seq	gly-12
WBGene00001638	-0.0796846	0.54795	0.637341	no	glp1ncl1 / glp1	RNA-seq	gly-13
WBGene00001643	-0.333362	0.41825	0.515824	no	glp1ncl1 / glp1	RNA-seq	gly-18
WBGene00001644	-0.264669	0.11605	0.18916	no	glp1ncl1 / glp1	RNA-seq	gly-19
WBGene00001645	0.160397	0.24835	0.34155	no	glp1ncl1 / glp1	RNA-seq	gly-20
WBGene00001646	-0.16695	0.43175	0.529033	no	glp1ncl1 / glp1	RNA-seq	gna-1
WBGene00001647	0.409013	0.14265	0.221959	no	glp1ncl1 / glp1	RNA-seq	gna-2
WBGene00001648	-0.283546	0.0494	0.094076	no	glp1ncl1 / glp1	RNA-seq	goa-1
WBGene00001649	-0.245324	0.0215	0.0463732	yes	glp1ncl1 / glp1	RNA-seq	gob-1
WBGene00001650	-0.325097	0.00265	0.00736138	yes	glp1ncl1 / glp1	RNA-seq	gon-1
WBGene00001651	-0.179061	0.1704	0.2555	no	glp1ncl1 / glp1	RNA-seq	gon-2
WBGene00001653	0.00606442	0.97015	0.97772	no	glp1ncl1 / glp1	RNA-seq	gon-4
WBGene00001660	-0.0866848	0.5114	0.604116	no	glp1ncl1 / glp1	RNA-seq	gop-1
WBGene00001661	1.10299	5e-05	0.000190833	yes	glp1ncl1 / glp1	RNA-seq	gop-2
WBGene00001662	0.464345	0.00025	0.000862343	yes	glp1ncl1 / glp1	RNA-seq	gop-3,hap-1
WBGene00001663	0.334306	0.51805	0.610271	no	glp1ncl1 / glp1	RNA-seq	gpa-1
WBGene00001664	-0.353353	0.3376	0.435362	no	glp1ncl1 / glp1	RNA-seq	gpa-2
WBGene00001665	-0.24912	0.5617	0.649654	no	glp1ncl1 / glp1	RNA-seq	gpa-3
WBGene00001669	-0.063943	0.7576	0.81654	no	glp1ncl1 / glp1	RNA-seq	gpa-7
WBGene00001671	0.728139	0.0962	0.16272	no	glp1ncl1 / glp1	RNA-seq	gpa-9
WBGene00001672	-0.636827	0.1525	0.234072	no	glp1ncl1 / glp1	RNA-seq	gpa-10
WBGene00001674	0.0573491	0.683	0.755155	no	glp1ncl1 / glp1	RNA-seq	gpa-12
WBGene00001675	-0.414947	0.28505	0.380598	no	glp1ncl1 / glp1	RNA-seq	gpa-13
WBGene00001676	0.651568	0.13845	0.216871	no	glp1ncl1 / glp1	RNA-seq	gpa-14
WBGene00001677	1.09854	0.00615	0.0155599	yes	glp1ncl1 / glp1	RNA-seq	gpa-15
WBGene00001678	0.0311426	0.9244	0.944733	no	glp1ncl1 / glp1	RNA-seq	gpa-16
WBGene00001679	-0.322592	0.7167	0.783357	no	glp1ncl1 / glp1	RNA-seq	gpb-1
WBGene00001680	-0.440766	0.23085	0.323608	no	glp1ncl1 / glp1	RNA-seq	gpb-2
WBGene00001681	-0.539904	0.17885	0.265343	no	glp1ncl1 / glp1	RNA-seq	gpc-1
WBGene00001682	-0.100154	0.4189	0.516501	no	glp1ncl1 / glp1	RNA-seq	gpc-2
WBGene00001683	0.143229	0.46175	0.557747	no	glp1ncl1 / glp1	RNA-seq	gpd-1
WBGene00001684	-0.101284	0.3421	0.439945	no	glp1ncl1 / glp1	RNA-seq	gpd-2,mai-1
WBGene00001685	-0.163518	0.12595	0.201611	no	glp1ncl1 / glp1	RNA-seq	gpd-3
WBGene00001686	0.381912	0.31205	0.408899	no	glp1ncl1 / glp1	RNA-seq	gpd-4
WBGene00001687	-0.723499	0.04635	0.0892138	no	glp1ncl1 / glp1	RNA-seq	gpn-1
WBGene00001690	-0.00677986	0.97765	0.983192	no	glp1ncl1 / glp1	RNA-seq	grd-1
WBGene00001692	-0.734199	5e-05	0.000190833	yes	glp1ncl1 / glp1	RNA-seq	grd-3
WBGene00001693	-0.644676	0.02685	0.0561049	no	glp1ncl1 / glp1	RNA-seq	grd-4
WBGene00001694	-0.713465	5e-05	0.000190833	yes	glp1ncl1 / glp1	RNA-seq	grd-5
WBGene00001699	-0.256841	0.02875	0.0595023	no	glp1ncl1 / glp1	RNA-seq	grd-10
WBGene00001702	-0.262559	0.03935	0.0777002	no	glp1ncl1 / glp1	RNA-seq	grd-13
WBGene00001703	-0.448871	0.00195	0.00559506	yes	glp1ncl1 / glp1	RNA-seq	grd-14
WBGene00001707	-0.114899	0.6593	0.734927	no	glp1ncl1 / glp1	RNA-seq	grh-1
WBGene00001708	-0.192999	0.2013	0.291189	no	glp1ncl1 / glp1	RNA-seq	grk-1
WBGene00001709	-0.175902	0.29295	0.388906	no	glp1ncl1 / glp1	RNA-seq	grk-2
WBGene00001713	0.115876	0.396	0.493935	no	glp1ncl1 / glp1	RNA-seq	grl-4
WBGene00001714	0.862966	0.0428	0.0834449	no	glp1ncl1 / glp1	RNA-seq	grl-5
WBGene00001716	1.98268	5e-05	0.000190833	yes	glp1ncl1 / glp1	RNA-seq	grl-7
WBGene00001717	-0.127353	0.7898	0.842388	no	glp1ncl1 / glp1	RNA-seq	grl-8
WBGene00001719	0.435674	0.80705	0.85608	no	glp1ncl1 / glp1	RNA-seq	grl-10
WBGene00001723	-0.318877	0.8189	0.865342	no	glp1ncl1 / glp1	RNA-seq	grl-14
WBGene00001724	0.351938	0.3564	0.454493	no	glp1ncl1 / glp1	RNA-seq	grl-15
WBGene00001725	0.0247463	0.86975	0.904499	no	glp1ncl1 / glp1	RNA-seq	grl-16
WBGene00001730	0.273021	0.3656	0.463806	no	glp1ncl1 / glp1	RNA-seq	grl-21
WBGene00001731	-0.498252	0.22935	0.322049	no	glp1ncl1 / glp1	RNA-seq	grl-22
WBGene00001736	0.112877	0.8585	0.895888	no	glp1ncl1 / glp1	RNA-seq	grl-27
WBGene00001740	1.09918	5e-05	0.000190833	yes	glp1ncl1 / glp1	RNA-seq	gro-1
WBGene00001743	-0.0485723	0.75545	0.81484	no	glp1ncl1 / glp1	RNA-seq	grp-1
WBGene00001744	0.662955	5e-05	0.000190833	yes	glp1ncl1 / glp1	RNA-seq	gars-1
WBGene00001745	0.106476	0.68845	0.759726	no	glp1ncl1 / glp1	RNA-seq	gsa-1
WBGene00001746	-0.0384329	0.85315	0.89182	no	glp1ncl1 / glp1	RNA-seq	gsk-3
WBGene00001747	-0.101732	0.4131	0.510778	no	glp1ncl1 / glp1	RNA-seq	gsp-1
WBGene00001748	0.167756	0.1212	0.1956	no	glp1ncl1 / glp1	RNA-seq	gsp-2
WBGene00001749	-0.185757	0.09295	0.158242	no	glp1ncl1 / glp1	RNA-seq	gst-1
WBGene00001750	-0.418478	0.21815	0.309797	no	glp1ncl1 / glp1	RNA-seq	gst-2
WBGene00001751	0.178804	0.5503	0.639454	no	glp1ncl1 / glp1	RNA-seq	gst-3
WBGene00001752	-0.569489	5e-05	0.000190833	yes	glp1ncl1 / glp1	RNA-seq	gst-4
WBGene00001753	0.102385	0.39	0.488043	no	glp1ncl1 / glp1	RNA-seq	gst-5
WBGene00001754	-0.0265213	0.85175	0.890762	no	glp1ncl1 / glp1	RNA-seq	gst-6
WBGene00001755	0.15683	0.2235	0.315755	no	glp1ncl1 / glp1	RNA-seq	gst-7
WBGene00001757	0.382459	0.1913	0.279756	no	glp1ncl1 / glp1	RNA-seq	gst-9
WBGene00001758	-0.479756	5e-05	0.000190833	yes	glp1ncl1 / glp1	RNA-seq	gst-10
WBGene00001759	-0.555475	0.17915	0.265712	no	glp1ncl1 / glp1	RNA-seq	gst-11
WBGene00001760	-0.581954	0.13675	0.214765	no	glp1ncl1 / glp1	RNA-seq	gst-12
WBGene00001761	-0.669554	5e-05	0.000190833	yes	glp1ncl1 / glp1	RNA-seq	gst-13
WBGene00001762	0.583139	0.2864	0.382042	no	glp1ncl1 / glp1	RNA-seq	gst-14
WBGene00001763	-0.17988	0.5134	0.605969	no	glp1ncl1 / glp1	RNA-seq	gst-15
WBGene00001764	-0.0522263	0.89755	0.92497	no	glp1ncl1 / glp1	RNA-seq	gst-16
WBGene00001767	0.29029	0.619	0.700265	no	glp1ncl1 / glp1	RNA-seq	gst-19
WBGene00001768	-0.292371	0.02395	0.0508527	no	glp1ncl1 / glp1	RNA-seq	gst-20
WBGene00001769	-0.112285	0.7264	0.791209	no	glp1ncl1 / glp1	RNA-seq	gst-21
WBGene00001770	-0.376668	0.02255	0.0483036	yes	glp1ncl1 / glp1	RNA-seq	gst-22
WBGene00001771	0.231387	0.6589	0.734591	no	glp1ncl1 / glp1	RNA-seq	gst-23
WBGene00001772	-1.41548	5e-05	0.000190833	yes	glp1ncl1 / glp1	RNA-seq	gst-24
WBGene00001774	-0.341382	0.0042	0.0110983	yes	glp1ncl1 / glp1	RNA-seq	gst-26
WBGene00001775	-0.418285	5e-05	0.000190833	yes	glp1ncl1 / glp1	RNA-seq	gst-27
WBGene00001776	-0.183515	0.18135	0.268327	no	glp1ncl1 / glp1	RNA-seq	gst-28
WBGene00001777	-0.493096	0.04705	0.0903292	no	glp1ncl1 / glp1	RNA-seq	gst-29
WBGene00001778	-0.369821	0.32915	0.426632	no	glp1ncl1 / glp1	RNA-seq	gst-30
WBGene00001779	-0.217308	0.6523	0.728973	no	glp1ncl1 / glp1	RNA-seq	gst-31
WBGene00001780	0.677193	0.25055	0.343701	no	glp1ncl1 / glp1	RNA-seq	gst-32
WBGene00001781	0.2736	0.43845	0.535394	no	glp1ncl1 / glp1	RNA-seq	gst-33
WBGene00001782	-1.44642	0.0131	0.0302129	yes	glp1ncl1 / glp1	RNA-seq	gst-34
WBGene00001783	0.110997	0.6553	0.731524	no	glp1ncl1 / glp1	RNA-seq	gst-35
WBGene00001784	-0.285355	0.0166	0.0371167	yes	glp1ncl1 / glp1	RNA-seq	gst-36
WBGene00001786	-0.987592	0.0068	0.0170023	yes	glp1ncl1 / glp1	RNA-seq	gst-38
WBGene00001787	-0.0564651	0.6616	0.736894	no	glp1ncl1 / glp1	RNA-seq	gst-39
WBGene00001788	-0.164888	0.64195	0.720179	no	glp1ncl1 / glp1	RNA-seq	gst-40
WBGene00001789	-0.334015	0.16555	0.2497	no	glp1ncl1 / glp1	RNA-seq	gst-41
WBGene00001790	-0.544091	5e-05	0.000190833	yes	glp1ncl1 / glp1	RNA-seq	gst-42
WBGene00001791	0.184376	0.33095	0.428484	no	glp1ncl1 / glp1	RNA-seq	gst-43
WBGene00001792	-0.292873	0.55575	0.644344	no	glp1ncl1 / glp1	RNA-seq	gst-44
WBGene00001793	-0.271469	0.0161	0.03614	yes	glp1ncl1 / glp1	RNA-seq	gsy-1
WBGene00001794	0.0790395	0.47075	0.566219	no	glp1ncl1 / glp1	RNA-seq	gta-1
WBGene00001795	-0.0903206	0.3977	0.495619	no	glp1ncl1 / glp1	RNA-seq	gtl-1
WBGene00001796	-0.0622899	0.63785	0.71664	no	glp1ncl1 / glp1	RNA-seq	gtl-2
WBGene00001803	-0.103755	0.6845	0.756388	no	glp1ncl1 / glp1	RNA-seq	lite-1
WBGene00001805	-0.564815	0.2597	0.353331	no	glp1ncl1 / glp1	RNA-seq	gur-4
WBGene00001806	-0.115107	0.8105	0.858767	no	glp1ncl1 / glp1	RNA-seq	gur-5
WBGene00001808	-0.370921	0.36895	0.467185	no	glp1ncl1 / glp1	RNA-seq	gut-2
WBGene00001811	0.0972023	0.68315	0.755293	no	glp1ncl1 / glp1	RNA-seq	haf-1
WBGene00001812	0.188377	0.1259	0.201554	no	glp1ncl1 / glp1	RNA-seq	haf-2
WBGene00001813	0.127596	0.3039	0.400336	no	glp1ncl1 / glp1	RNA-seq	haf-3
WBGene00001814	-0.116386	0.28715	0.382832	no	glp1ncl1 / glp1	RNA-seq	haf-4
WBGene00001815	0.00421805	0.97895	0.984132	no	glp1ncl1 / glp1	RNA-seq	hmt-1
WBGene00001816	2.79904	5e-05	0.000190833	yes	glp1ncl1 / glp1	RNA-seq	haf-6
WBGene00001817	0.430763	0.00125	0.00374988	yes	glp1ncl1 / glp1	RNA-seq	haf-7
WBGene00001819	-0.0517699	0.6242	0.704754	no	glp1ncl1 / glp1	RNA-seq	haf-9
WBGene00001821	-0.170261	0.5254	0.616992	no	glp1ncl1 / glp1	RNA-seq	ham-2
WBGene00001823	0.464345	0.00025	0.000862343	yes	glp1ncl1 / glp1	RNA-seq	gop-3,hap-1
WBGene00001824	-0.269182	0.16395	0.247768	no	glp1ncl1 / glp1	RNA-seq	hbl-1
WBGene00001827	0.225065	0.1076	0.178266	no	glp1ncl1 / glp1	RNA-seq	hcf-1
WBGene00001829	3.35012	0.06725	0.121625	no	glp1ncl1 / glp1	RNA-seq	hcp-1
WBGene00001830	0.590461	0.0293	0.0604787	no	glp1ncl1 / glp1	RNA-seq	hcp-2
WBGene00001831	1.41932	0.0003	0.0010199	yes	glp1ncl1 / glp1	RNA-seq	hcp-3
WBGene00001832	0.488516	0.00145	0.00428758	yes	glp1ncl1 / glp1	RNA-seq	hcp-4
WBGene00001833	1.83577	0.18825	0.27628	no	glp1ncl1 / glp1	RNA-seq	hcp-6
WBGene00001834	0.0521662	0.74325	0.80487	no	glp1ncl1 / glp1	RNA-seq	hda-1
WBGene00001835	-0.0611872	0.76235	0.820409	no	glp1ncl1 / glp1	RNA-seq	hda-2
WBGene00001836	0.056302	0.75315	0.812949	no	glp1ncl1 / glp1	RNA-seq	hda-3
WBGene00001837	-0.0220755	0.9235	0.944077	no	glp1ncl1 / glp1	RNA-seq	hda-4
WBGene00001838	0.236017	0.17205	0.257438	no	glp1ncl1 / glp1	RNA-seq	hda-10
WBGene00001840	0.450476	0.0002	0.000701644	yes	glp1ncl1 / glp1	RNA-seq	hel-1
WBGene00001841	-1.04893	0.0146	0.0331964	yes	glp1ncl1 / glp1	RNA-seq	hen-1
WBGene00001843	-0.332232	0.00155	0.00455463	yes	glp1ncl1 / glp1	RNA-seq	hgo-1
WBGene00001844	-0.117793	0.3449	0.442772	no	glp1ncl1 / glp1	RNA-seq	hid-1
WBGene00001851	-0.282098	0.00645	0.0162272	yes	glp1ncl1 / glp1	RNA-seq	hif-1
WBGene00001852	0.372687	0.0171	0.038082	yes	glp1ncl1 / glp1	RNA-seq	hil-1
WBGene00001853	1.11435	0.00115	0.00347703	yes	glp1ncl1 / glp1	RNA-seq	hil-2
WBGene00001854	0.476327	0.2662	0.36038	no	glp1ncl1 / glp1	RNA-seq	hil-3
WBGene00001855	4.85425	0.0155	0.0349678	yes	glp1ncl1 / glp1	RNA-seq	hil-4
WBGene00001856	4.80342	0.0334	0.0676024	no	glp1ncl1 / glp1	RNA-seq	hil-5
WBGene00001858	2.16694	0.0046	0.0120357	yes	glp1ncl1 / glp1	RNA-seq	hil-7
WBGene00001860	-0.118222	0.4618	0.557787	no	glp1ncl1 / glp1	RNA-seq	F28B3.6,him-1
WBGene00001862	3.58532	0.12695	0.202869	no	glp1ncl1 / glp1	RNA-seq	him-3
WBGene00001863	-0.148275	0.18125	0.268227	no	glp1ncl1 / glp1	RNA-seq	him-4
WBGene00001864	0.68649	0.32755	0.424986	no	glp1ncl1 / glp1	RNA-seq	him-5
WBGene00001865	0.557045	0.01775	0.0393223	yes	glp1ncl1 / glp1	RNA-seq	him-6
WBGene00001867	-0.0263421	0.9637	0.973114	no	glp1ncl1 / glp1	RNA-seq	him-8
WBGene00001869	1.26137	0.0165	0.0369226	yes	glp1ncl1 / glp1	RNA-seq	him-10
WBGene00001874	0.159827	0.21595	0.307334	no	glp1ncl1 / glp1	RNA-seq	him-17
WBGene00001875	2.21628	5e-05	0.000190833	yes	glp1ncl1 / glp1	RNA-seq	his-1
WBGene00001876	3.37449	0.0001	0.000367464	yes	glp1ncl1 / glp1	RNA-seq	his-2
WBGene00001877	1.45205	0.0004	0.00132807	yes	glp1ncl1 / glp1	RNA-seq	his-3
WBGene00001878	3.32492	5e-05	0.000190833	yes	glp1ncl1 / glp1	RNA-seq	his-4
WBGene00001879	1.80363	0.00655	0.0164489	yes	glp1ncl1 / glp1	RNA-seq	his-5
WBGene00001880	2.2566	0.00055	0.00177921	yes	glp1ncl1 / glp1	RNA-seq	his-6
WBGene00001881	1.39529	0.05305	0.0998601	no	glp1ncl1 / glp1	RNA-seq	his-7
WBGene00001891	2.60135	0.0001	0.000367464	yes	glp1ncl1 / glp1	RNA-seq	his-17
WBGene00001892	2.57319	5e-05	0.000190833	yes	glp1ncl1 / glp1	RNA-seq	his-18
WBGene00001898	-0.0453737	0.84595	0.886262	no	glp1ncl1 / glp1	RNA-seq	his-24
WBGene00001899	0.789081	0.35025	0.448207	no	glp1ncl1 / glp1	RNA-seq	his-25
WBGene00001905	2.68616	0.27765	0.372639	no	glp1ncl1 / glp1	RNA-seq	his-31
WBGene00001906	4.17704	0.00425	0.0112148	yes	glp1ncl1 / glp1	RNA-seq	his-32
WBGene00001909	-0.122873	0.2688	0.363138	no	glp1ncl1 / glp1	RNA-seq	his-35
WBGene00001910	0.0479075	0.67395	0.747517	no	glp1ncl1 / glp1	RNA-seq	C50F4.6,his-41
WBGene00001911	0.0920186	0.4867	0.581168	no	glp1ncl1 / glp1	RNA-seq	his-37
WBGene00001912	-1.03361	0.0031	0.00847015	yes	glp1ncl1 / glp1	RNA-seq	his-38
WBGene00001914	-0.587126	0.0416	0.0814528	no	glp1ncl1 / glp1	RNA-seq	his-40
WBGene00001915	0.0479075	0.67395	0.747517	no	glp1ncl1 / glp1	RNA-seq	C50F4.6,his-41
WBGene00001918	0.962007	0.2146	0.305823	no	glp1ncl1 / glp1	RNA-seq	his-44
WBGene00001920	5.4168	0.1334	0.210852	no	glp1ncl1 / glp1	RNA-seq	his-46
WBGene00001921	4.38507	0.0127	0.0294127	yes	glp1ncl1 / glp1	RNA-seq	his-47
WBGene00001922	4.15796	5e-05	0.000190833	yes	glp1ncl1 / glp1	RNA-seq	his-48
WBGene00001929	Inf	5e-05	0.000190833	yes	glp1ncl1 / glp1	RNA-seq	his-55
WBGene00001933	3.89655	5e-05	0.000190833	yes	glp1ncl1 / glp1	RNA-seq	his-59
WBGene00001934	3.51267	5e-05	0.000190833	yes	glp1ncl1 / glp1	RNA-seq	his-60
WBGene00001935	3.28815	5e-05	0.000190833	yes	glp1ncl1 / glp1	RNA-seq	his-61
WBGene00001936	3.39228	5e-05	0.000190833	yes	glp1ncl1 / glp1	RNA-seq	his-62
WBGene00001937	4.7128	0.1191	0.192879	no	glp1ncl1 / glp1	RNA-seq	his-63
WBGene00001938	4.52768	5e-05	0.000190833	yes	glp1ncl1 / glp1	RNA-seq	his-64
WBGene00001941	4.62124	0.0008	0.00250263	yes	glp1ncl1 / glp1	RNA-seq	his-67
WBGene00001942	5.02829	0.20975	0.300599	no	glp1ncl1 / glp1	RNA-seq	his-68
WBGene00001945	0.25664	0.03025	0.0621543	no	glp1ncl1 / glp1	RNA-seq	his-71
WBGene00001946	0.353791	0.0033	0.0089557	yes	glp1ncl1 / glp1	RNA-seq	his-72
WBGene00001948	0.139041	0.5682	0.655432	no	glp1ncl1 / glp1	RNA-seq	hlh-1
WBGene00001949	0.443352	0.26	0.353638	no	glp1ncl1 / glp1	RNA-seq	hlh-2
WBGene00001951	-0.613615	0.30995	0.40669	no	glp1ncl1 / glp1	RNA-seq	hlh-4
WBGene00001953	0.182916	0.7246	0.789762	no	glp1ncl1 / glp1	RNA-seq	hlh-8
WBGene00001955	0.213282	0.1204	0.194565	no	glp1ncl1 / glp1	RNA-seq	hlh-11
WBGene00001956	0.517116	0.75295	0.812783	no	glp1ncl1 / glp1	RNA-seq	hlh-12
WBGene00001957	1.28272	0.1753	0.261185	no	glp1ncl1 / glp1	RNA-seq	hlh-13
WBGene00001961	1.36676	0.3415	0.439326	no	glp1ncl1 / glp1	RNA-seq	hlh-17
WBGene00001971	-0.169368	0.19385	0.282723	no	glp1ncl1 / glp1	RNA-seq	hmg-1.1
WBGene00001972	-0.103426	0.4015	0.499345	no	glp1ncl1 / glp1	RNA-seq	hmg-1.2
WBGene00001973	4.1029	0.27905	0.374142	no	glp1ncl1 / glp1	RNA-seq	hmg-3
WBGene00001974	0.435665	0.00055	0.00177921	yes	glp1ncl1 / glp1	RNA-seq	hmg-4
WBGene00001975	0.186122	0.42355	0.521054	no	glp1ncl1 / glp1	RNA-seq	hmg-5,nrde-4
WBGene00001976	0.09825	0.48395	0.578528	no	glp1ncl1 / glp1	RNA-seq	hmg-11
WBGene00001977	0.832334	5e-05	0.000190833	yes	glp1ncl1 / glp1	RNA-seq	hmg-12
WBGene00001978	0.129016	0.4989	0.592583	no	glp1ncl1 / glp1	RNA-seq	hmp-1
WBGene00001979	-0.0597051	0.654	0.73046	no	glp1ncl1 / glp1	RNA-seq	hmp-2
WBGene00001980	0.188479	0.1111	0.182675	no	glp1ncl1 / glp1	RNA-seq	hmr-1
WBGene00001983	1.69928	5e-05	0.000190833	yes	glp1ncl1 / glp1	RNA-seq	hoe-1
WBGene00001984	0.312504	0.35155	0.44952	no	glp1ncl1 / glp1	RNA-seq	hog-1
WBGene00001985	0.548897	0.562	0.649932	no	glp1ncl1 / glp1	RNA-seq	hop-1
WBGene00001986	-0.473994	0.16505	0.249084	no	glp1ncl1 / glp1	RNA-seq	hot-1
WBGene00001987	-0.349933	0.39035	0.488386	no	glp1ncl1 / glp1	RNA-seq	hot-2
WBGene00001988	-0.737503	0.26305	0.356933	no	glp1ncl1 / glp1	RNA-seq	hot-3
WBGene00001989	-0.406667	0.56385	0.6516	no	glp1ncl1 / glp1	RNA-seq	hot-4
WBGene00001990	0.654255	0.07725	0.136302	no	glp1ncl1 / glp1	RNA-seq	hot-5
WBGene00001991	0.217025	0.35995	0.458092	no	glp1ncl1 / glp1	RNA-seq	hot-6
WBGene00001992	-0.156581	0.61875	0.70005	no	glp1ncl1 / glp1	RNA-seq	ace-3,hot-7
WBGene00001993	-0.244934	0.0175	0.0388494	yes	glp1ncl1 / glp1	RNA-seq	hpd-1
WBGene00001994	-0.282385	0.02125	0.0459209	yes	glp1ncl1 / glp1	RNA-seq	hpk-1
WBGene00001995	-0.0869979	0.7178	0.784259	no	glp1ncl1 / glp1	RNA-seq	hpl-1
WBGene00001996	0.203937	0.27015	0.364592	no	glp1ncl1 / glp1	RNA-seq	hpl-2
WBGene00001997	-0.0905309	0.86525	0.901136	no	glp1ncl1 / glp1	RNA-seq	hpr-9
WBGene00001998	1.73757	0.0077	0.0189705	yes	glp1ncl1 / glp1	RNA-seq	hpr-17
WBGene00001999	0.161139	0.1738	0.259539	no	glp1ncl1 / glp1	RNA-seq	hrp-1
WBGene00002000	0.0897824	0.4195	0.517076	no	glp1ncl1 / glp1	RNA-seq	hrp-2
WBGene00002001	1.033	5e-05	0.000190833	yes	glp1ncl1 / glp1	RNA-seq	hars-1
WBGene00002002	-0.0743187	0.59225	0.676815	no	glp1ncl1 / glp1	RNA-seq	eak-7,hsb-1
WBGene00002003	0.135471	0.3652	0.463415	no	glp1ncl1 / glp1	RNA-seq	hse-5
WBGene00002004	0.284453	0.06685	0.121031	no	glp1ncl1 / glp1	RNA-seq	hsf-1
WBGene00002005	0.391592	0.00045	0.00148033	yes	glp1ncl1 / glp1	RNA-seq	hsp-1
WBGene00002007	0.159951	0.1532	0.234821	no	glp1ncl1 / glp1	RNA-seq	hsp-3
WBGene00002008	-0.324976	0.00335	0.00907639	yes	glp1ncl1 / glp1	RNA-seq	hsp-4
WBGene00002010	0.325099	0.00185	0.00533685	yes	glp1ncl1 / glp1	RNA-seq	hsp-6
WBGene00002011	-0.00188533	0.99155	0.993389	no	glp1ncl1 / glp1	RNA-seq	hsp-12.2
WBGene00002012	0.428868	0.04865	0.0928995	no	glp1ncl1 / glp1	RNA-seq	hsp-12.3
WBGene00002013	-0.413729	0.51125	0.60398	no	glp1ncl1 / glp1	RNA-seq	hsp-12.6
WBGene00002015	1.28449	5e-05	0.000190833	yes	glp1ncl1 / glp1	RNA-seq	hsp-16.1
WBGene00002016	1.52731	5e-05	0.000190833	yes	glp1ncl1 / glp1	RNA-seq	hsp-16.2
WBGene00002017	2.00228	0.00365	0.00979999	yes	glp1ncl1 / glp1	RNA-seq	hsp-16.11
WBGene00002018	1.94377	5e-05	0.000190833	yes	glp1ncl1 / glp1	RNA-seq	hsp-16.41
WBGene00002019	1.39833	0.0147	0.0333888	yes	glp1ncl1 / glp1	RNA-seq	hsp-16.48
WBGene00002020	0.475603	0.12835	0.20462	no	glp1ncl1 / glp1	RNA-seq	hsp-16.49
WBGene00002021	0.134255	0.7428	0.804552	no	glp1ncl1 / glp1	RNA-seq	hsp-17
WBGene00002023	-0.187735	0.1292	0.205695	no	glp1ncl1 / glp1	RNA-seq	hsp-25
WBGene00002024	0.28781	0.00895	0.0216468	yes	glp1ncl1 / glp1	RNA-seq	hsp-43
WBGene00002025	0.687285	5e-05	0.000190833	yes	glp1ncl1 / glp1	RNA-seq	hsp-60
WBGene00002026	0.831022	5e-05	0.000190833	yes	glp1ncl1 / glp1	RNA-seq	hsp-70
WBGene00002027	0.0710192	0.58135	0.667184	no	glp1ncl1 / glp1	RNA-seq	hsr-9
WBGene00002028	0.0198741	0.88385	0.914965	no	glp1ncl1 / glp1	RNA-seq	hst-1
WBGene00002029	0.00818679	0.9634	0.97289	no	glp1ncl1 / glp1	RNA-seq	hst-2
WBGene00002030	-0.0634064	0.853	0.891703	no	glp1ncl1 / glp1	RNA-seq	hst-3.1
WBGene00002031	-0.140955	0.58885	0.673866	no	glp1ncl1 / glp1	RNA-seq	hst-6
WBGene00002032	1.86299	0.00705	0.0175523	yes	glp1ncl1 / glp1	RNA-seq	htp-1
WBGene00002034	Inf	5e-05	0.000190833	yes	glp1ncl1 / glp1	RNA-seq	htp-3
WBGene00002035	-0.134323	0.2189	0.310659	no	glp1ncl1 / glp1	RNA-seq	hum-1
WBGene00002036	-0.0387529	0.79265	0.844661	no	glp1ncl1 / glp1	RNA-seq	hum-2
WBGene00002037	-0.434596	0.0002	0.000701644	yes	glp1ncl1 / glp1	RNA-seq	hum-4
WBGene00002038	-0.453699	5e-05	0.000190833	yes	glp1ncl1 / glp1	RNA-seq	hum-5
WBGene00002039	0.134618	0.4081	0.505848	no	glp1ncl1 / glp1	RNA-seq	hum-6
WBGene00002040	-0.160863	0.1951	0.284139	no	glp1ncl1 / glp1	RNA-seq	hum-7
WBGene00002041	-0.25351	0.0171	0.038082	yes	glp1ncl1 / glp1	RNA-seq	hum-8
WBGene00002042	-0.124028	0.73045	0.794567	no	glp1ncl1 / glp1	RNA-seq	hus-1
WBGene00002043	0.0333965	0.811	0.859153	no	glp1ncl1 / glp1	RNA-seq	hyl-1
WBGene00002044	-0.364897	0.00895	0.0216468	yes	glp1ncl1 / glp1	RNA-seq	hyl-2
WBGene00002045	0.953922	5e-05	0.000190833	yes	glp1ncl1 / glp1	RNA-seq	C56C10.7,icd-1
WBGene00002046	0.771294	5e-05	0.000190833	yes	glp1ncl1 / glp1	RNA-seq	icln-1
WBGene00002047	2.72036	5e-05	0.000190833	yes	glp1ncl1 / glp1	RNA-seq	icp-1
WBGene00002048	-0.0639552	0.60555	0.68852	no	glp1ncl1 / glp1	RNA-seq	ida-1
WBGene00002050	-0.043952	0.6737	0.747297	no	glp1ncl1 / glp1	RNA-seq	ifa-1
WBGene00002052	0.0529999	0.64425	0.722206	no	glp1ncl1 / glp1	RNA-seq	ifa-4
WBGene00002053	0.0975545	0.35535	0.453418	no	glp1ncl1 / glp1	RNA-seq	ifb-1
WBGene00002054	0.0633163	0.5427	0.632613	no	glp1ncl1 / glp1	RNA-seq	ifb-2
WBGene00002055	-0.0596358	0.6039	0.687069	no	glp1ncl1 / glp1	RNA-seq	ifc-1
WBGene00002056	-0.0549732	0.6224	0.70317	no	glp1ncl1 / glp1	RNA-seq	ifc-2
WBGene00002057	-0.146858	0.2336	0.3266	no	glp1ncl1 / glp1	RNA-seq	ifd-1
WBGene00002058	0.601921	5e-05	0.000190833	yes	glp1ncl1 / glp1	RNA-seq	ifd-2
WBGene00002059	0.662739	5e-05	0.000190833	yes	glp1ncl1 / glp1	RNA-seq	ife-1
WBGene00002060	0.511567	5e-05	0.000190833	yes	glp1ncl1 / glp1	RNA-seq	ife-2
WBGene00002061	0.242424	0.10545	0.175375	no	glp1ncl1 / glp1	RNA-seq	ife-3
WBGene00002062	0.0794999	0.66185	0.737107	no	glp1ncl1 / glp1	RNA-seq	ife-4
WBGene00002063	0.830064	0.08445	0.146506	no	glp1ncl1 / glp1	RNA-seq	ife-5
WBGene00002064	2.26772	5e-05	0.000190833	yes	glp1ncl1 / glp1	RNA-seq	iff-1
WBGene00002065	0.697881	5e-05	0.000190833	yes	glp1ncl1 / glp1	RNA-seq	iff-2
WBGene00002066	0.154604	0.15855	0.241339	no	glp1ncl1 / glp1	RNA-seq	ifg-1
WBGene00002067	0.34545	0.01525	0.0344757	yes	glp1ncl1 / glp1	RNA-seq	ifp-1
WBGene00002068	1.16304	0.0015	0.00442146	yes	glp1ncl1 / glp1	RNA-seq	ify-1
WBGene00002069	0.487839	0.00095	0.00292569	yes	glp1ncl1 / glp1	RNA-seq	ikb-1
WBGene00002070	0.0458801	0.689	0.760207	no	glp1ncl1 / glp1	RNA-seq	K07A1.15,ile-1
WBGene00002071	-0.106037	0.3553	0.453366	no	glp1ncl1 / glp1	RNA-seq	ile-2
WBGene00002072	0.0784394	0.6095	0.692008	no	glp1ncl1 / glp1	RNA-seq	ima-1
WBGene00002073	2.53976	5e-05	0.000190833	yes	glp1ncl1 / glp1	RNA-seq	ima-2
WBGene00002074	0.429165	0.0029	0.00798084	yes	glp1ncl1 / glp1	RNA-seq	ima-3
WBGene00002075	0.0791337	0.64055	0.718993	no	glp1ncl1 / glp1	RNA-seq	imb-1
WBGene00002076	0.203586	0.09835	0.165699	no	glp1ncl1 / glp1	RNA-seq	imb-2
WBGene00002077	0.570444	5e-05	0.000190833	yes	glp1ncl1 / glp1	RNA-seq	C53D5.5,imb-3
WBGene00002078	0.128498	0.35025	0.448207	no	glp1ncl1 / glp1	RNA-seq	xpo-1
WBGene00002079	0.270748	0.042	0.0821108	no	glp1ncl1 / glp1	RNA-seq	xpo-2
WBGene00002080	0.638329	5e-05	0.000190833	yes	glp1ncl1 / glp1	RNA-seq	xpo-3
WBGene00002081	-0.211719	0.0433	0.0842625	no	glp1ncl1 / glp1	RNA-seq	ina-1
WBGene00002083	0.768733	5e-05	0.000190833	yes	glp1ncl1 / glp1	RNA-seq	inf-1
WBGene00002084	-0.204618	0.5021	0.59554	no	glp1ncl1 / glp1	RNA-seq	ins-1
WBGene00002085	-0.477245	0.5419	0.631892	no	glp1ncl1 / glp1	RNA-seq	ins-2
WBGene00002086	0.706007	0.04555	0.0879224	no	glp1ncl1 / glp1	RNA-seq	ins-3
WBGene00002087	0.146625	0.6772	0.750272	no	glp1ncl1 / glp1	RNA-seq	ins-4
WBGene00002089	-0.260541	0.43555	0.532656	no	glp1ncl1 / glp1	RNA-seq	ins-6
WBGene00002090	0.567006	0.00045	0.00148033	yes	glp1ncl1 / glp1	RNA-seq	ins-7
WBGene00002092	-1.99651	0.0599	0.110525	no	glp1ncl1 / glp1	RNA-seq	ins-9
WBGene00002093	1.9925	0.3185	0.415616	no	glp1ncl1 / glp1	RNA-seq	ins-10
WBGene00002095	1.80085	0.2621	0.355915	no	glp1ncl1 / glp1	RNA-seq	ins-12
WBGene00002096	0.143315	0.64145	0.719766	no	glp1ncl1 / glp1	RNA-seq	acdh-2,ins-13
WBGene00002097	-0.275173	0.60115	0.684673	no	glp1ncl1 / glp1	RNA-seq	ins-14
WBGene00002100	0.0880165	0.6301	0.709933	no	glp1ncl1 / glp1	RNA-seq	ins-17
WBGene00002101	0.062859	0.84335	0.884255	no	glp1ncl1 / glp1	RNA-seq	ins-18
WBGene00002102	1.9336	0.01935	0.042359	yes	glp1ncl1 / glp1	RNA-seq	ins-19
WBGene00002103	2.94467	0.01285	0.0297124	yes	glp1ncl1 / glp1	RNA-seq	ins-20
WBGene00002105	-0.186116	0.6728	0.746536	no	glp1ncl1 / glp1	RNA-seq	ins-22
WBGene00002106	1.97274	0.3209	0.418109	no	glp1ncl1 / glp1	RNA-seq	ins-23
WBGene00002107	0.0167068	0.9451	0.959778	no	glp1ncl1 / glp1	RNA-seq	ins-24
WBGene00002109	0.198955	0.396	0.493935	no	glp1ncl1 / glp1	RNA-seq	ins-26
WBGene00002110	-0.212289	0.368	0.466228	no	glp1ncl1 / glp1	RNA-seq	ins-27
WBGene00002111	-0.322102	0.40335	0.50114	no	glp1ncl1 / glp1	RNA-seq	ins-28
WBGene00002112	0.0468283	0.88895	0.918761	no	glp1ncl1 / glp1	RNA-seq	ins-29
WBGene00002113	0.262925	0.2929	0.388854	no	glp1ncl1 / glp1	RNA-seq	ins-30
WBGene00002114	-0.580068	0.26345	0.357352	no	glp1ncl1 / glp1	RNA-seq	ins-31
WBGene00002115	2.29726	0.2468	0.340077	no	glp1ncl1 / glp1	RNA-seq	ins-32
WBGene00002116	-0.659615	0.03865	0.0765338	no	glp1ncl1 / glp1	RNA-seq	ins-33
WBGene00002118	-0.219567	0.70475	0.773424	no	glp1ncl1 / glp1	RNA-seq	ins-35
WBGene00002120	2.36235	0.0042	0.0110983	yes	glp1ncl1 / glp1	RNA-seq	ins-37
WBGene00002123	-0.457143	0.03185	0.0649486	no	glp1ncl1 / glp1	RNA-seq	inx-1
WBGene00002124	1.92069	0.0006	0.00192594	yes	glp1ncl1 / glp1	RNA-seq	inx-2
WBGene00002125	0.832421	0.1368	0.214826	no	glp1ncl1 / glp1	RNA-seq	inx-3
WBGene00002127	-0.202188	0.10315	0.17229	no	glp1ncl1 / glp1	RNA-seq	inx-5
WBGene00002128	0.389071	0.0558	0.104145	no	glp1ncl1 / glp1	RNA-seq	inx-6
WBGene00002129	0.189607	0.531	0.622066	no	glp1ncl1 / glp1	RNA-seq	inx-7
WBGene00002130	-0.329373	0.00155	0.00455463	yes	glp1ncl1 / glp1	RNA-seq	inx-8
WBGene00002131	-0.119634	0.3407	0.438519	no	glp1ncl1 / glp1	RNA-seq	inx-9
WBGene00002132	0.0066446	0.99645	0.997102	no	glp1ncl1 / glp1	RNA-seq	inx-10
WBGene00002133	-0.0594484	0.78405	0.837801	no	glp1ncl1 / glp1	RNA-seq	inx-11
WBGene00002134	0.0909533	0.38285	0.480963	no	glp1ncl1 / glp1	RNA-seq	inx-12
WBGene00002135	0.196587	0.071	0.127144	no	glp1ncl1 / glp1	RNA-seq	inx-13
WBGene00002136	4.89782	0.1557	0.237867	no	glp1ncl1 / glp1	RNA-seq	inx-14
WBGene00002137	-0.22962	0.0366	0.0730544	no	glp1ncl1 / glp1	RNA-seq	inx-15
WBGene00002138	-0.184734	0.0924	0.157606	no	glp1ncl1 / glp1	RNA-seq	inx-16
WBGene00002139	-0.317868	0.0116	0.0271839	yes	glp1ncl1 / glp1	RNA-seq	inx-17
WBGene00002140	-0.552495	0.10355	0.172813	no	glp1ncl1 / glp1	RNA-seq	inx-18
WBGene00002142	0.20953	0.573	0.659783	no	glp1ncl1 / glp1	RNA-seq	inx-20
WBGene00002144	5.38086	0.24195	0.335254	no	glp1ncl1 / glp1	RNA-seq	inx-22
WBGene00002146	-0.201646	0.40925	0.506981	no	glp1ncl1 / glp1	RNA-seq	ipp-5
WBGene00002147	-0.119636	0.3702	0.468413	no	glp1ncl1 / glp1	RNA-seq	ire-1
WBGene00002148	0.306505	0.01775	0.0393223	yes	glp1ncl1 / glp1	RNA-seq	gon-14
WBGene00002150	-0.304503	0.5948	0.679126	no	glp1ncl1 / glp1	RNA-seq	irk-2
WBGene00002151	-0.17599	0.5232	0.614986	no	glp1ncl1 / glp1	RNA-seq	irk-3
WBGene00002152	0.671777	5e-05	0.000190833	yes	glp1ncl1 / glp1	RNA-seq	iars-1
WBGene00002153	0.203151	0.2895	0.385273	no	glp1ncl1 / glp1	RNA-seq	iars-2
WBGene00002162	-0.00685295	0.9486	0.962302	no	glp1ncl1 / glp1	RNA-seq	isp-1
WBGene00002163	-0.380331	0.0223	0.0478479	yes	glp1ncl1 / glp1	RNA-seq	ist-1
WBGene00002169	0.0302203	0.84345	0.884336	no	glp1ncl1 / glp1	RNA-seq	isw-1
WBGene00002173	-0.212768	0.04365	0.0848371	no	glp1ncl1 / glp1	RNA-seq	itr-1
WBGene00002174	-0.123783	0.2442	0.337529	no	glp1ncl1 / glp1	RNA-seq	itx-1
WBGene00002175	-0.168245	0.62815	0.708211	no	glp1ncl1 / glp1	RNA-seq	jac-1
WBGene00002176	-0.142501	0.54755	0.636975	no	glp1ncl1 / glp1	RNA-seq	jip-1
WBGene00002177	0.222203	0.539	0.629311	no	glp1ncl1 / glp1	RNA-seq	jkk-1
WBGene00002178	-0.299437	0.5456	0.635199	no	glp1ncl1 / glp1	RNA-seq	jnk-1
WBGene00002179	-0.07421	0.5008	0.594358	no	glp1ncl1 / glp1	RNA-seq	jph-1
WBGene00002180	-0.152715	0.44875	0.545283	no	glp1ncl1 / glp1	RNA-seq	jtr-1
WBGene00002181	0.061646	0.8149	0.862266	no	glp1ncl1 / glp1	RNA-seq	kal-1
WBGene00002182	0.0400188	0.8756	0.908808	no	glp1ncl1 / glp1	RNA-seq	kap-1
WBGene00002183	-0.654435	5e-05	0.000190833	yes	glp1ncl1 / glp1	RNA-seq	kat-1
WBGene00002184	-0.177927	0.88625	0.916766	no	glp1ncl1 / glp1	RNA-seq	kel-1
WBGene00002185	0.0292897	0.8467	0.886856	no	glp1ncl1 / glp1	RNA-seq	kel-3
WBGene00002187	0.0100594	0.93105	0.949587	no	glp1ncl1 / glp1	RNA-seq	kgb-1
WBGene00002188	-0.667777	0.35065	0.448603	no	glp1ncl1 / glp1	RNA-seq	kgb-2
WBGene00002189	-0.38273	0.024	0.0509456	no	glp1ncl1 / glp1	RNA-seq	kin-1
WBGene00002190	-0.256771	0.03295	0.0668355	no	glp1ncl1 / glp1	RNA-seq	kin-2
WBGene00002191	0.170672	0.1149	0.18766	no	glp1ncl1 / glp1	RNA-seq	kin-3
WBGene00002192	-0.171075	0.14145	0.220531	no	glp1ncl1 / glp1	RNA-seq	kin-4
WBGene00002195	-0.0667219	0.79595	0.847253	no	glp1ncl1 / glp1	RNA-seq	kin-9
WBGene00002196	0.127294	0.2591	0.352667	no	glp1ncl1 / glp1	RNA-seq	kin-10
WBGene00002198	0.149499	0.63415	0.713477	no	glp1ncl1 / glp1	RNA-seq	kin-14
WBGene00002199	-0.0356383	0.81745	0.864282	no	glp1ncl1 / glp1	RNA-seq	kin-15
WBGene00002200	-0.128703	0.35625	0.454332	no	glp1ncl1 / glp1	RNA-seq	kin-16
WBGene00002201	-0.1017	0.37385	0.472083	no	glp1ncl1 / glp1	RNA-seq	kin-18
WBGene00002202	-0.129951	0.30625	0.402775	no	glp1ncl1 / glp1	RNA-seq	kin-19
WBGene00002203	-0.0923409	0.56195	0.649885	no	glp1ncl1 / glp1	RNA-seq	kin-20
WBGene00002207	-0.311632	0.0155	0.0349678	yes	glp1ncl1 / glp1	RNA-seq	sid-3
WBGene00002210	-0.211999	0.0823	0.143445	no	glp1ncl1 / glp1	RNA-seq	kin-29
WBGene00002211	-0.26525	0.34345	0.441267	no	glp1ncl1 / glp1	RNA-seq	kin-30
WBGene00002213	-0.0172448	0.90685	0.931893	no	glp1ncl1 / glp1	RNA-seq	kin-32
WBGene00002214	1.19745	0.00085	0.00264436	yes	glp1ncl1 / glp1	RNA-seq	klc-1
WBGene00002215	0.12151	0.38415	0.482262	no	glp1ncl1 / glp1	RNA-seq	klc-2
WBGene00002216	-0.231816	0.1128	0.184968	no	glp1ncl1 / glp1	RNA-seq	klp-3
WBGene00002217	-0.159469	0.1377	0.215935	no	glp1ncl1 / glp1	RNA-seq	klp-4
WBGene00002218	0.181538	0.9409	0.956772	no	glp1ncl1 / glp1	RNA-seq	C45G9.6,klp-6
WBGene00002219	0.0503763	0.70495	0.773578	no	glp1ncl1 / glp1	RNA-seq	klp-7
WBGene00002220	-0.241054	0.0802	0.140543	no	glp1ncl1 / glp1	RNA-seq	gcc-1
WBGene00002222	-0.41686	0.24555	0.338889	no	glp1ncl1 / glp1	RNA-seq	klp-11
WBGene00002223	0.00828949	0.94875	0.962406	no	glp1ncl1 / glp1	RNA-seq	klp-12
WBGene00002224	-0.321947	0.6765	0.749721	no	glp1ncl1 / glp1	RNA-seq	klp-13
WBGene00002225	1.0211	0.00015	0.000536873	yes	glp1ncl1 / glp1	RNA-seq	klp-15
WBGene00002226	0.222112	0.156	0.238223	no	glp1ncl1 / glp1	RNA-seq	klp-16
WBGene00002228	3.57608	5e-05	0.000190833	yes	glp1ncl1 / glp1	RNA-seq	klp-18
WBGene00002229	1.20265	0.10425	0.173754	no	glp1ncl1 / glp1	RNA-seq	klp-19
WBGene00002230	0.107921	0.5779	0.664124	no	glp1ncl1 / glp1	RNA-seq	klp-20
WBGene00002231	1.54033	5e-05	0.000190833	yes	glp1ncl1 / glp1	RNA-seq	knl-1
WBGene00002232	-0.154483	0.3067	0.403245	no	glp1ncl1 / glp1	RNA-seq	kpc-1
WBGene00002233	0.519838	0.2039	0.294188	no	glp1ncl1 / glp1	RNA-seq	kqt-1
WBGene00002234	-0.416137	0.06525	0.11863	no	glp1ncl1 / glp1	RNA-seq	kqt-2
WBGene00002235	-0.492521	0.00505	0.0130694	yes	glp1ncl1 / glp1	RNA-seq	kqt-3
WBGene00002238	0.918749	5e-05	0.000190833	yes	glp1ncl1 / glp1	RNA-seq	kars-1
WBGene00002239	-0.14329	0.40895	0.506675	no	glp1ncl1 / glp1	RNA-seq	ksr-1
WBGene00002240	-0.0662932	0.80445	0.854032	no	glp1ncl1 / glp1	RNA-seq	ksr-2
WBGene00002241	0.382341	0.03685	0.0734858	no	glp1ncl1 / glp1	RNA-seq	kup-1
WBGene00002242	-0.0817215	0.75595	0.815243	no	glp1ncl1 / glp1	RNA-seq	kvs-1
WBGene00002243	-0.2222	0.47395	0.569214	no	glp1ncl1 / glp1	RNA-seq	lad-2
WBGene00002244	0.0732734	0.5859	0.671258	no	glp1ncl1 / glp1	RNA-seq	laf-1
WBGene00002245	0.0916948	0.58615	0.671454	no	glp1ncl1 / glp1	RNA-seq	lag-1
WBGene00002247	0.304413	0.23045	0.323181	no	glp1ncl1 / glp1	RNA-seq	lam-1
WBGene00002248	0.157281	0.14145	0.220531	no	glp1ncl1 / glp1	RNA-seq	lam-3
WBGene00002249	-0.178373	0.1016	0.170151	no	glp1ncl1 / glp1	RNA-seq	lap-1
WBGene00002250	-0.0335944	0.74945	0.809912	no	glp1ncl1 / glp1	RNA-seq	lap-2
WBGene00002251	0.0293389	0.7948	0.846349	no	glp1ncl1 / glp1	RNA-seq	lat-1
WBGene00002252	0.328106	0.15725	0.239742	no	glp1ncl1 / glp1	RNA-seq	lat-2
WBGene00002253	-0.0942586	0.3903	0.48834	no	glp1ncl1 / glp1	RNA-seq	lbp-1
WBGene00002254	-0.278518	0.00845	0.0205837	yes	glp1ncl1 / glp1	RNA-seq	lbp-2
WBGene00002255	0.169942	0.1217	0.196246	no	glp1ncl1 / glp1	RNA-seq	lbp-3
WBGene00002256	0.748135	5e-05	0.000190833	yes	glp1ncl1 / glp1	RNA-seq	lbp-4
WBGene00002257	0.192228	0.1155	0.188432	no	glp1ncl1 / glp1	RNA-seq	lbp-5
WBGene00002258	-0.254691	0.0155	0.0349678	yes	glp1ncl1 / glp1	RNA-seq	lbp-6
WBGene00002259	0.141911	0.2935	0.389492	no	glp1ncl1 / glp1	RNA-seq	lbp-7
WBGene00002260	-0.48412	0.19565	0.284772	no	glp1ncl1 / glp1	RNA-seq	lbp-8
WBGene00002261	-0.114663	0.42465	0.522112	no	glp1ncl1 / glp1	RNA-seq	ldb-1
WBGene00002262	-0.0564027	0.5885	0.67356	no	glp1ncl1 / glp1	RNA-seq	ldh-1
WBGene00002263	0.102844	0.36235	0.460515	no	glp1ncl1 / glp1	RNA-seq	lea-1
WBGene00002264	-0.180869	0.10975	0.181035	no	glp1ncl1 / glp1	RNA-seq	lec-1
WBGene00002265	-0.24098	0.0567	0.105568	no	glp1ncl1 / glp1	RNA-seq	lec-2
WBGene00002266	-0.024837	0.89835	0.925555	no	glp1ncl1 / glp1	RNA-seq	lec-3
WBGene00002267	0.0824417	0.4281	0.525494	no	glp1ncl1 / glp1	RNA-seq	lec-4
WBGene00002268	0.087461	0.40205	0.499869	no	glp1ncl1 / glp1	RNA-seq	lec-5
WBGene00002269	-0.248002	0.02075	0.0449852	yes	glp1ncl1 / glp1	RNA-seq	lec-6
WBGene00002270	0.67225	0.01485	0.0336872	yes	glp1ncl1 / glp1	RNA-seq	lec-7
WBGene00002271	0.00107543	0.99245	0.994052	no	glp1ncl1 / glp1	RNA-seq	lec-8
WBGene00002272	-0.484511	5e-05	0.000190833	yes	glp1ncl1 / glp1	RNA-seq	lec-9
WBGene00002273	-0.235152	0.02355	0.0501268	no	glp1ncl1 / glp1	RNA-seq	lec-10
WBGene00002274	-0.160985	0.21085	0.30178	no	glp1ncl1 / glp1	RNA-seq	lec-11
WBGene00002275	0.257186	0.1206	0.19482	no	glp1ncl1 / glp1	RNA-seq	lem-2
WBGene00002276	-0.0374871	0.78045	0.834945	no	glp1ncl1 / glp1	RNA-seq	lem-3
WBGene00002280	0.0247634	0.8254	0.870414	no	glp1ncl1 / glp1	RNA-seq	let-2
WBGene00002282	-0.144628	0.86915	0.904039	no	glp1ncl1 / glp1	RNA-seq	let-4
WBGene00002295	-0.292268	0.0097	0.0232367	yes	glp1ncl1 / glp1	RNA-seq	let-19
WBGene00002297	1.43173	0.00095	0.00292569	yes	glp1ncl1 / glp1	RNA-seq	ect-2
WBGene00002299	0.0207225	0.9197	0.941288	no	glp1ncl1 / glp1	RNA-seq	let-23
WBGene00002324	0.380073	0.1595	0.242501	no	glp1ncl1 / glp1	RNA-seq	let-49
WBGene00002335	-0.074103	0.59665	0.680754	no	glp1ncl1 / glp1	RNA-seq	let-60
WBGene00002344	-0.00434856	0.96945	0.977168	no	glp1ncl1 / glp1	RNA-seq	let-70
WBGene00002348	0.120327	0.25505	0.348273	no	glp1ncl1 / glp1	RNA-seq	myo-1
WBGene00002363	0.0374915	0.7672	0.82433	no	glp1ncl1 / glp1	RNA-seq	let-92
WBGene00002368	1.27685	5e-05	0.000190833	yes	glp1ncl1 / glp1	RNA-seq	let-99
WBGene00002393	0.919552	0.0837	0.145472	no	glp1ncl1 / glp1	RNA-seq	lpr-1
WBGene00002497	0.572933	5e-05	0.000190833	yes	glp1ncl1 / glp1	RNA-seq	let-268
WBGene00002583	-0.0878851	0.3996	0.497494	no	glp1ncl1 / glp1	RNA-seq	let-363
WBGene00002601	-0.0885512	0.86885	0.903813	no	glp1ncl1 / glp1	RNA-seq	let-381
WBGene00002632	-0.0435528	0.7209	0.786783	no	glp1ncl1 / glp1	RNA-seq	let-413
WBGene00002637	-0.093997	0.3686	0.466835	no	glp1ncl1 / glp1	RNA-seq	let-418
WBGene00002694	-0.0352502	0.7789	0.833721	no	glp1ncl1 / glp1	RNA-seq	let-502
WBGene00002696	0.156242	0.33345	0.431105	no	glp1ncl1 / glp1	RNA-seq	let-504
WBGene00002717	-0.291497	0.01335	0.0307098	yes	glp1ncl1 / glp1	RNA-seq	let-526
WBGene00002783	0.0800102	0.55205	0.640991	no	glp1ncl1 / glp1	RNA-seq	let-607,try-6
WBGene00002804	1.00523	5e-05	0.000190833	yes	glp1ncl1 / glp1	RNA-seq	let-630
WBGene00002827	-0.272744	0.1964	0.285619	no	glp1ncl1 / glp1	RNA-seq	let-653
WBGene00002845	-0.0502574	0.62585	0.706189	no	glp1ncl1 / glp1	RNA-seq	let-711
WBGene00002850	1.58512	5e-05	0.000190833	yes	glp1ncl1 / glp1	RNA-seq	let-716
WBGene00002855	-0.0528822	0.626	0.706325	no	glp1ncl1 / glp1	RNA-seq	let-721
WBGene00002879	-0.0175494	0.88025	0.9123	no	glp1ncl1 / glp1	RNA-seq	let-754
WBGene00002881	0.0184073	0.93115	0.949657	no	glp1ncl1 / glp1	RNA-seq	let-756
WBGene00002889	0.180562	0.0932	0.158582	no	glp1ncl1 / glp1	RNA-seq	let-765
WBGene00002891	-0.250218	0.0176	0.0390355	yes	glp1ncl1 / glp1	RNA-seq	C56G2.7,let-767
WBGene00002915	0.000393464	0.99785	0.998212	no	glp1ncl1 / glp1	RNA-seq	let-805
WBGene00002957	0.0335241	0.7863	0.839597	no	glp1ncl1 / glp1	RNA-seq	let-858
WBGene00002974	-0.113228	0.50805	0.601041	no	glp1ncl1 / glp1	RNA-seq	lev-1
WBGene00002975	-0.0310097	0.91135	0.935122	no	glp1ncl1 / glp1	RNA-seq	lev-8
WBGene00002976	-0.413319	0.13235	0.20975	no	glp1ncl1 / glp1	RNA-seq	lev-9
WBGene00002977	-0.267895	0.08395	0.145828	no	glp1ncl1 / glp1	RNA-seq	eat-18,lev-10
WBGene00002978	-0.168388	0.1114	0.183078	no	glp1ncl1 / glp1	RNA-seq	lev-11
WBGene00002979	-0.183858	0.112	0.183886	no	glp1ncl1 / glp1	RNA-seq	lfe-2
WBGene00002980	0.0571281	0.58035	0.666288	no	glp1ncl1 / glp1	RNA-seq	lgg-1
WBGene00002981	-0.0624019	0.6334	0.712847	no	glp1ncl1 / glp1	RNA-seq	lgg-2
WBGene00002982	-0.311778	0.22175	0.313857	no	glp1ncl1 / glp1	RNA-seq	lgg-3
WBGene00002985	0.520248	0.01715	0.0381749	yes	glp1ncl1 / glp1	RNA-seq	lig-1
WBGene00002986	0.238472	0.21275	0.303773	no	glp1ncl1 / glp1	RNA-seq	C07H6.2,lig-4
WBGene00002988	0.123206	0.66745	0.741928	no	glp1ncl1 / glp1	RNA-seq	lim-6
WBGene00002989	0.012154	0.95395	0.966166	no	glp1ncl1 / glp1	RNA-seq	lim-7
WBGene00002990	-0.123688	0.4017	0.499535	no	glp1ncl1 / glp1	RNA-seq	lin-1
WBGene00002991	-0.332027	0.01115	0.0262546	yes	glp1ncl1 / glp1	RNA-seq	lin-2
WBGene00002992	0.199041	0.912	0.935631	no	glp1ncl1 / glp1	RNA-seq	lin-3
WBGene00002994	0.0194086	0.8745	0.907948	no	glp1ncl1 / glp1	RNA-seq	lin-5
WBGene00002996	-0.268956	0.29165	0.387514	no	glp1ncl1 / glp1	RNA-seq	lin-7
WBGene00002997	-0.178408	0.39	0.488043	no	glp1ncl1 / glp1	RNA-seq	lin-8
WBGene00002998	-0.00912902	0.96185	0.971824	no	glp1ncl1 / glp1	RNA-seq	lin-9
WBGene00002999	-0.245739	0.03015	0.0619785	no	glp1ncl1 / glp1	RNA-seq	lin-10
WBGene00003000	-0.21625	0.37255	0.470813	no	glp1ncl1 / glp1	RNA-seq	lin-11
WBGene00003001	-0.073792	0.6736	0.747217	no	glp1ncl1 / glp1	RNA-seq	lin-12
WBGene00003002	0.0657315	0.5431	0.632947	no	glp1ncl1 / glp1	RNA-seq	lin-13
WBGene00003003	-0.275809	0.16295	0.246683	no	glp1ncl1 / glp1	RNA-seq	lin-14
WBGene00003006	-0.0247736	0.8847	0.915631	no	glp1ncl1 / glp1	RNA-seq	lin-17
WBGene00003007	-0.264418	0.04725	0.0906514	no	glp1ncl1 / glp1	RNA-seq	lin-18
WBGene00003008	0.349861	0.4447	0.541354	no	glp1ncl1 / glp1	RNA-seq	lin-22
WBGene00003009	-0.0897604	0.4935	0.587543	no	glp1ncl1 / glp1	RNA-seq	lin-23
WBGene00003010	0.162922	0.35485	0.452893	no	glp1ncl1 / glp1	RNA-seq	lin-24
WBGene00003011	-0.0133097	0.9295	0.948477	no	glp1ncl1 / glp1	RNA-seq	lin-25
WBGene00003012	0.0121157	0.9263	0.946159	no	glp1ncl1 / glp1	RNA-seq	lin-26,lir-1
WBGene00003014	-0.153169	0.41995	0.517512	no	glp1ncl1 / glp1	RNA-seq	lin-28
WBGene00003015	-0.403471	0.309	0.405691	no	glp1ncl1 / glp1	RNA-seq	lin-29
WBGene00003019	0.0792024	0.54385	0.633597	no	glp1ncl1 / glp1	RNA-seq	lin-33
WBGene00003020	0.189999	0.4884	0.582768	no	glp1ncl1 / glp1	RNA-seq	lin-35
WBGene00003021	0.091846	0.6771	0.750208	no	glp1ncl1 / glp1	RNA-seq	lin-36
WBGene00003022	0.382114	0.0855	0.147982	no	glp1ncl1 / glp1	RNA-seq	lin-37
WBGene00003024	-0.288704	0.3255	0.422884	no	glp1ncl1 / glp1	RNA-seq	lin-39
WBGene00003025	0.0221494	0.8734	0.907154	no	glp1ncl1 / glp1	RNA-seq	lin-40
WBGene00003026	0.817507	0.0052	0.0134141	yes	glp1ncl1 / glp1	RNA-seq	lin-41
WBGene00003029	0.14364	0.6158	0.697456	no	glp1ncl1 / glp1	RNA-seq	lin-44
WBGene00003030	-0.208729	0.22995	0.322681	no	glp1ncl1 / glp1	RNA-seq	lin-45
WBGene00003031	0.132842	0.60865	0.69127	no	glp1ncl1 / glp1	RNA-seq	lin-46
WBGene00003034	0.0285041	0.82045	0.866585	no	glp1ncl1 / glp1	RNA-seq	lin-49
WBGene00003035	-0.138078	0.61135	0.693577	no	glp1ncl1 / glp1	RNA-seq	lin-52
WBGene00003036	0.583473	5e-05	0.000190833	yes	glp1ncl1 / glp1	RNA-seq	lin-53
WBGene00003037	0.52049	0.0785	0.138122	no	glp1ncl1 / glp1	RNA-seq	lin-54
WBGene00003038	0.352619	0.17235	0.257802	no	glp1ncl1 / glp1	RNA-seq	lin-56
WBGene00003040	-0.210307	0.08525	0.147644	no	glp1ncl1 / glp1	RNA-seq	lin-59
WBGene00003041	0.244424	0.16825	0.252908	no	glp1ncl1 / glp1	RNA-seq	lin-61
WBGene00003043	-0.0479399	0.86865	0.903669	no	glp1ncl1 / glp1	RNA-seq	lip-1
WBGene00003044	0.0121157	0.9263	0.946159	no	glp1ncl1 / glp1	RNA-seq	lin-26,lir-1
WBGene00003045	0.241196	0.27155	0.366083	no	glp1ncl1 / glp1	RNA-seq	lir-2
WBGene00003046	0.030462	0.94315	0.958349	no	glp1ncl1 / glp1	RNA-seq	lir-3
WBGene00003047	-0.114036	0.3687	0.466929	no	glp1ncl1 / glp1	RNA-seq	lis-1
WBGene00003048	-0.156214	0.424	0.521463	no	glp1ncl1 / glp1	RNA-seq	lit-1
WBGene00003052	0.0624479	0.55885	0.647059	no	glp1ncl1 / glp1	RNA-seq	lmn-1
WBGene00003053	-0.161196	0.1339	0.211364	no	glp1ncl1 / glp1	RNA-seq	lmp-1
WBGene00003055	0.217796	0.03995	0.0786938	no	glp1ncl1 / glp1	RNA-seq	lon-1
WBGene00003056	-0.393647	0.00235	0.00661478	yes	glp1ncl1 / glp1	RNA-seq	lon-2
WBGene00003057	0.828727	0.4675	0.563151	no	glp1ncl1 / glp1	RNA-seq	lon-3
WBGene00003059	2.18915	5e-05	0.000190833	yes	glp1ncl1 / glp1	RNA-seq	lpd-2
WBGene00003060	-0.102805	0.41215	0.509817	no	glp1ncl1 / glp1	RNA-seq	lpd-3
WBGene00003061	-0.16438	0.12895	0.205374	no	glp1ncl1 / glp1	RNA-seq	lpd-5
WBGene00003062	2.43572	5e-05	0.000190833	yes	glp1ncl1 / glp1	RNA-seq	lpd-6
WBGene00003063	2.23931	5e-05	0.000190833	yes	glp1ncl1 / glp1	RNA-seq	lpd-7
WBGene00003064	0.0678004	0.6116	0.69379	no	glp1ncl1 / glp1	RNA-seq	lpd-8
WBGene00003065	-0.190621	0.0921	0.157204	no	glp1ncl1 / glp1	RNA-seq	lpd-9
WBGene00003066	0.383901	0.00505	0.0130694	yes	glp1ncl1 / glp1	RNA-seq	lpl-1
WBGene00003068	-0.197476	0.0649	0.118099	no	glp1ncl1 / glp1	RNA-seq	lrk-1
WBGene00003071	-0.00470083	0.964	0.973327	no	glp1ncl1 / glp1	RNA-seq	lrp-1
WBGene00003072	-0.0530752	0.61185	0.694003	no	glp1ncl1 / glp1	RNA-seq	lrp-2
WBGene00003073	2.28297	5e-05	0.000190833	yes	glp1ncl1 / glp1	RNA-seq	lars-1
WBGene00003074	1.52898	5e-05	0.000190833	yes	glp1ncl1 / glp1	RNA-seq	lars-2
WBGene00003076	-0.0542204	0.75535	0.814759	no	glp1ncl1 / glp1	RNA-seq	lsm-1
WBGene00003077	0.203854	0.659	0.734683	no	glp1ncl1 / glp1	RNA-seq	lsm-3
WBGene00003078	0.227213	0.4063	0.504074	no	glp1ncl1 / glp1	RNA-seq	lsm-4
WBGene00003079	0.0846528	0.6682	0.742577	no	glp1ncl1 / glp1	RNA-seq	lsm-5
WBGene00003080	-0.014712	0.9459	0.960374	no	glp1ncl1 / glp1	RNA-seq	lsm-6
WBGene00003081	0.127302	0.73405	0.797485	no	glp1ncl1 / glp1	RNA-seq	lsm-7
WBGene00003082	0.392543	0.0622	0.114002	no	glp1ncl1 / glp1	RNA-seq	lsm-8
WBGene00003083	0.0141624	0.94475	0.959509	no	glp1ncl1 / glp1	RNA-seq	lst-1
WBGene00003084	-0.133181	0.37055	0.468778	no	glp1ncl1 / glp1	RNA-seq	lst-2
WBGene00003085	0.237519	0.0306	0.062764	no	glp1ncl1 / glp1	RNA-seq	lst-3
WBGene00003086	0.0262905	0.86905	0.90397	no	glp1ncl1 / glp1	RNA-seq	lst-4
WBGene00003087	0.1645	0.2856	0.381182	no	glp1ncl1 / glp1	RNA-seq	lsy-2
WBGene00003089	0.0726684	0.71475	0.781779	no	glp1ncl1 / glp1	RNA-seq	ltd-1
WBGene00003090	-0.27445	0.0254	0.0534974	no	glp1ncl1 / glp1	RNA-seq	lys-1
WBGene00003091	-0.621125	5e-05	0.000190833	yes	glp1ncl1 / glp1	RNA-seq	lys-2
WBGene00003092	0.419712	0.1761	0.262134	no	glp1ncl1 / glp1	RNA-seq	lys-3
WBGene00003093	0.700878	5e-05	0.000190833	yes	glp1ncl1 / glp1	RNA-seq	lys-4
WBGene00003094	0.334564	0.35575	0.453822	no	glp1ncl1 / glp1	RNA-seq	lys-5
WBGene00003095	0.566256	0.00805	0.0197249	yes	glp1ncl1 / glp1	RNA-seq	lys-6
WBGene00003096	0.387611	0.0007	0.00221615	yes	glp1ncl1 / glp1	RNA-seq	lys-7
WBGene00003097	-0.410879	0.0003	0.0010199	yes	glp1ncl1 / glp1	RNA-seq	lys-8
WBGene00003099	1.42528	5e-05	0.000190833	yes	glp1ncl1 / glp1	RNA-seq	lys-10
WBGene00003102	-0.435221	0.1526	0.234192	no	glp1ncl1 / glp1	RNA-seq	mab-5
WBGene00003104	0.297544	0.36965	0.467877	no	glp1ncl1 / glp1	RNA-seq	mab-7
WBGene00003106	-0.263375	0.51465	0.607156	no	glp1ncl1 / glp1	RNA-seq	mab-9
WBGene00003107	-0.231454	0.5293	0.62051	no	glp1ncl1 / glp1	RNA-seq	mab-10
WBGene00003111	0.191307	0.4216	0.519137	no	glp1ncl1 / glp1	RNA-seq	mab-20
WBGene00003112	0.0147854	0.9792	0.984309	no	glp1ncl1 / glp1	RNA-seq	mab-21
WBGene00003119	2.46368	5e-05	0.000190833	yes	glp1ncl1 / glp1	RNA-seq	mac-1
WBGene00003123	0.254023	0.0876	0.15092	no	glp1ncl1 / glp1	RNA-seq	mag-1
WBGene00003124	-0.101284	0.3421	0.439945	no	glp1ncl1 / glp1	RNA-seq	gpd-2,mai-1
WBGene00003129	0.505908	0.00025	0.000862343	yes	glp1ncl1 / glp1	RNA-seq	map-1
WBGene00003130	0.829119	5e-05	0.000190833	yes	glp1ncl1 / glp1	RNA-seq	map-2
WBGene00003132	-0.115432	0.4387	0.535639	no	glp1ncl1 / glp1	RNA-seq	mat-1
WBGene00003133	-0.0299703	0.8285	0.872806	no	glp1ncl1 / glp1	RNA-seq	mat-2
WBGene00003134	0.162894	0.42165	0.519188	no	glp1ncl1 / glp1	RNA-seq	mat-3
WBGene00003136	0.0200191	0.89775	0.92512	no	glp1ncl1 / glp1	RNA-seq	mau-2
WBGene00003142	0.135065	0.6851	0.75687	no	glp1ncl1 / glp1	RNA-seq	mau-8
WBGene00003143	0.308047	0.0216	0.0465556	yes	glp1ncl1 / glp1	RNA-seq	max-1
WBGene00003144	-0.219085	0.20025	0.290037	no	glp1ncl1 / glp1	RNA-seq	max-2
WBGene00003148	0.595743	5e-05	0.000190833	yes	glp1ncl1 / glp1	RNA-seq	mbf-1
WBGene00003149	-0.0462198	0.7303	0.794447	no	glp1ncl1 / glp1	RNA-seq	mbk-1
WBGene00003150	0.065455	0.64825	0.725548	no	glp1ncl1 / glp1	RNA-seq	mbk-2
WBGene00003151	-0.473014	5e-05	0.000190833	yes	glp1ncl1 / glp1	RNA-seq	mca-1
WBGene00003153	-0.174746	0.09895	0.166534	no	glp1ncl1 / glp1	RNA-seq	mca-3
WBGene00003154	2.60498	0.114	0.186488	no	glp1ncl1 / glp1	RNA-seq	mcm-2
WBGene00003155	2.02559	0.00115	0.00347703	yes	glp1ncl1 / glp1	RNA-seq	mcm-3
WBGene00003156	2.03061	0.001	0.00306446	yes	glp1ncl1 / glp1	RNA-seq	mcm-4
WBGene00003157	3.74898	5e-05	0.000190833	yes	glp1ncl1 / glp1	RNA-seq	mcm-5
WBGene00003158	0.922973	5e-05	0.000190833	yes	glp1ncl1 / glp1	RNA-seq	mcm-6
WBGene00003159	1.55649	0.0001	0.000367464	yes	glp1ncl1 / glp1	RNA-seq	mcm-7
WBGene00003160	0.00179746	0.9878	0.990634	no	glp1ncl1 / glp1	RNA-seq	mdf-1
WBGene00003161	4.31138	0.068	0.122744	no	glp1ncl1 / glp1	RNA-seq	mdf-2
WBGene00003162	0.0523276	0.6124	0.694501	no	glp1ncl1 / glp1	RNA-seq	mdh-2
WBGene00003163	-0.592027	0.0009	0.00278523	yes	glp1ncl1 / glp1	RNA-seq	mdl-1
WBGene00003164	0.0961323	0.64775	0.725139	no	glp1ncl1 / glp1	RNA-seq	mdt-6
WBGene00003165	-0.0507336	0.84765	0.887573	no	glp1ncl1 / glp1	RNA-seq	mec-1
WBGene00003166	-0.655421	0.0427	0.0832744	no	glp1ncl1 / glp1	RNA-seq	mec-2
WBGene00003167	-0.435479	0.20665	0.297327	no	glp1ncl1 / glp1	RNA-seq	mec-3
WBGene00003169	-0.397731	0.0018	0.00520717	yes	glp1ncl1 / glp1	RNA-seq	mec-5
WBGene00003170	-0.110089	0.93365	0.951528	no	glp1ncl1 / glp1	RNA-seq	mec-6
WBGene00003171	-0.0806025	0.54385	0.633597	no	glp1ncl1 / glp1	RNA-seq	mec-7
WBGene00003172	-0.0731723	0.81445	0.861944	no	glp1ncl1 / glp1	RNA-seq	mec-8
WBGene00003173	0.308333	0.31135	0.408162	no	glp1ncl1 / glp1	RNA-seq	mec-9
WBGene00003174	-0.13698	0.6462	0.723888	no	glp1ncl1 / glp1	RNA-seq	mec-10
WBGene00003175	-0.205233	0.093	0.158313	no	glp1ncl1 / glp1	RNA-seq	mec-12
WBGene00003177	-0.0347619	0.84775	0.887645	no	glp1ncl1 / glp1	RNA-seq	mec-15
WBGene00003178	-0.0752273	0.81875	0.865237	no	glp1ncl1 / glp1	RNA-seq	mec-17
WBGene00003179	-0.13329	0.644	0.721985	no	glp1ncl1 / glp1	RNA-seq	mec-18
WBGene00003182	-0.148081	0.44005	0.53696	no	glp1ncl1 / glp1	RNA-seq	mef-2
WBGene00003183	0.174728	0.6485	0.725755	no	glp1ncl1 / glp1	RNA-seq	mei-1
WBGene00003184	5.31925	0.0026	0.0072389	yes	glp1ncl1 / glp1	RNA-seq	mei-2
WBGene00003185	-0.182247	0.1808	0.267688	no	glp1ncl1 / glp1	RNA-seq	mek-1
WBGene00003186	-0.0912317	0.53095	0.622024	no	glp1ncl1 / glp1	RNA-seq	mek-2
WBGene00003196	-0.034044	0.76155	0.819772	no	glp1ncl1 / glp1	RNA-seq	mel-11
WBGene00003209	-0.00242917	0.9836	0.987515	no	glp1ncl1 / glp1	RNA-seq	mel-26
WBGene00003210	0.0866062	0.4602	0.55627	no	glp1ncl1 / glp1	RNA-seq	mel-28
WBGene00003214	9.42822e-05	0.99945	0.999514	no	glp1ncl1 / glp1	RNA-seq	mel-32
WBGene00003218	0.00152483	0.98875	0.991386	no	glp1ncl1 / glp1	RNA-seq	mep-1
WBGene00003219	-0.613245	0.11025	0.18168	no	glp1ncl1 / glp1	RNA-seq	mes-1
WBGene00003220	0.277883	0.1862	0.274021	no	glp1ncl1 / glp1	RNA-seq	mes-2
WBGene00003221	0.0814096	0.52	0.612085	no	glp1ncl1 / glp1	RNA-seq	mes-3
WBGene00003222	1.52221	5e-05	0.000190833	yes	glp1ncl1 / glp1	RNA-seq	mes-4
WBGene00003224	0.250274	0.2612	0.354931	no	glp1ncl1 / glp1	RNA-seq	C09G4.4,cks-1,mes-6
WBGene00003225	0.0490933	0.66495	0.739784	no	glp1ncl1 / glp1	RNA-seq	ced-9,mev-1
WBGene00003229	1.0264	0.0016	0.00468594	yes	glp1ncl1 / glp1	RNA-seq	mex-3
WBGene00003230	4.62169	0.03285	0.0666638	no	glp1ncl1 / glp1	RNA-seq	mex-5
WBGene00003231	5.99652	0.0026	0.0072389	yes	glp1ncl1 / glp1	RNA-seq	mex-6
WBGene00003232	-0.153753	0.5483	0.637665	no	glp1ncl1 / glp1	RNA-seq	mgl-1
WBGene00003233	-0.519911	0.00165	0.00481608	yes	glp1ncl1 / glp1	RNA-seq	maf-1,mgl-2
WBGene00003234	-0.351376	0.03265	0.0663213	no	glp1ncl1 / glp1	RNA-seq	mif-1
WBGene00003235	-0.290354	0.01325	0.0305058	yes	glp1ncl1 / glp1	RNA-seq	mif-2
WBGene00003236	0.127803	0.55645	0.644948	no	glp1ncl1 / glp1	RNA-seq	mif-3
WBGene00003237	0.352466	0.4458	0.542435	no	glp1ncl1 / glp1	RNA-seq	mif-4
WBGene00003238	-0.44708	0.04035	0.0793563	no	glp1ncl1 / glp1	RNA-seq	mig-1
WBGene00003239	-0.228901	0.09235	0.15754	no	glp1ncl1 / glp1	RNA-seq	mig-2
WBGene00003241	0.221161	0.15735	0.239875	no	glp1ncl1 / glp1	RNA-seq	mig-5
WBGene00003242	0.237922	0.03015	0.0619785	no	glp1ncl1 / glp1	RNA-seq	mig-6
WBGene00003243	0.0378998	0.7606	0.818978	no	glp1ncl1 / glp1	RNA-seq	mig-10
WBGene00003245	-0.298906	0.22065	0.312608	no	glp1ncl1 / glp1	RNA-seq	mig-13
WBGene00003246	0.187965	0.4004	0.498273	no	glp1ncl1 / glp1	RNA-seq	mig-14
WBGene00003247	-0.164231	0.1468	0.227074	no	glp1ncl1 / glp1	RNA-seq	mig-15
WBGene00003248	-0.102431	0.63165	0.711327	no	glp1ncl1 / glp1	RNA-seq	mig-17
WBGene00003249	0.411309	0.03065	0.0628553	no	glp1ncl1 / glp1	RNA-seq	mig-18
WBGene00003252	-0.950662	0.0994	0.167149	no	glp1ncl1 / glp1	RNA-seq	mig-21
WBGene00003253	-0.21012	0.072	0.128606	no	glp1ncl1 / glp1	RNA-seq	mig-22
WBGene00003254	-0.0642688	0.61685	0.698383	no	glp1ncl1 / glp1	RNA-seq	mig-23
WBGene00003258	0.192365	0.3543	0.452316	no	glp1ncl1 / glp1	RNA-seq	cogc-1
WBGene00003367	0.290741	0.05595	0.104378	no	glp1ncl1 / glp1	RNA-seq	mix-1
WBGene00003368	0.168792	0.3989	0.496787	no	glp1ncl1 / glp1	RNA-seq	mkk-4
WBGene00003369	-0.0809188	0.4529	0.549283	no	glp1ncl1 / glp1	RNA-seq	mlc-1
WBGene00003370	-0.120829	0.2748	0.369563	no	glp1ncl1 / glp1	RNA-seq	mlc-2
WBGene00003371	0.00181798	0.98705	0.990069	no	glp1ncl1 / glp1	RNA-seq	mlc-3
WBGene00003372	-0.184454	0.09395	0.159615	no	glp1ncl1 / glp1	RNA-seq	mlc-4
WBGene00003373	-0.0410998	0.78685	0.840009	no	glp1ncl1 / glp1	RNA-seq	mlh-1
WBGene00003374	-0.237418	0.07315	0.130323	no	glp1ncl1 / glp1	RNA-seq	mlk-1
WBGene00003375	-0.032801	0.7708	0.827213	no	glp1ncl1 / glp1	RNA-seq	mlp-1
WBGene00003376	-0.161924	0.66045	0.735902	no	glp1ncl1 / glp1	RNA-seq	mls-1
WBGene00003378	-0.185108	0.1556	0.237733	no	glp1ncl1 / glp1	RNA-seq	mml-1
WBGene00003380	0.307053	0.36	0.458137	no	glp1ncl1 / glp1	RNA-seq	mnm-2
WBGene00003384	-0.114314	0.45355	0.549883	no	glp1ncl1 / glp1	RNA-seq	moc-1
WBGene00003385	0.103149	0.82655	0.871294	no	glp1ncl1 / glp1	RNA-seq	moc-2
WBGene00003386	-0.0655149	0.79375	0.845538	no	glp1ncl1 / glp1	RNA-seq	mod-1
WBGene00003387	0.00904925	0.9826	0.986765	no	glp1ncl1 / glp1	RNA-seq	mod-5
WBGene00003388	-0.20882	0.43425	0.531415	no	glp1ncl1 / glp1	RNA-seq	moe-3
WBGene00003389	0.0062807	0.95715	0.968405	no	glp1ncl1 / glp1	RNA-seq	mog-1
WBGene00003390	0.56662	0.00275	0.00760908	yes	glp1ncl1 / glp1	RNA-seq	mog-2
WBGene00003391	0.0540423	0.69095	0.761901	no	glp1ncl1 / glp1	RNA-seq	mog-3
WBGene00003392	0.503061	0.0002	0.000701644	yes	glp1ncl1 / glp1	RNA-seq	mog-4
WBGene00003393	0.115144	0.3432	0.441023	no	glp1ncl1 / glp1	RNA-seq	mog-5
WBGene00003394	0.198378	0.57645	0.662833	no	glp1ncl1 / glp1	RNA-seq	mom-1
WBGene00003395	0.946506	0.0075	0.0185358	yes	glp1ncl1 / glp1	RNA-seq	mom-2
WBGene00003396	0.259319	0.12075	0.195017	no	glp1ncl1 / glp1	RNA-seq	mom-4
WBGene00003397	-0.241232	0.13095	0.207933	no	glp1ncl1 / glp1	RNA-seq	mom-5
WBGene00003400	-0.223593	0.0395	0.0779486	no	glp1ncl1 / glp1	RNA-seq	dapk-1
WBGene00003401	-0.0859634	0.49875	0.59245	no	glp1ncl1 / glp1	RNA-seq	mpk-1
WBGene00003402	-0.0881503	0.5404	0.630527	no	glp1ncl1 / glp1	RNA-seq	mpk-2
WBGene00003403	-0.0521681	0.9464	0.960717	no	glp1ncl1 / glp1	RNA-seq	mps-1
WBGene00003404	-0.30018	0.01815	0.0400874	yes	glp1ncl1 / glp1	RNA-seq	mpz-1
WBGene00003405	2.76317	0.0001	0.000367464	yes	glp1ncl1 / glp1	RNA-seq	mre-11
WBGene00003406	0.267112	0.0899	0.154149	no	glp1ncl1 / glp1	RNA-seq	mrg-1
WBGene00003407	-0.177568	0.09195	0.157	no	glp1ncl1 / glp1	RNA-seq	mrp-1
WBGene00003408	0.0993322	0.41245	0.510132	no	glp1ncl1 / glp1	RNA-seq	mrp-2
WBGene00003409	-0.0697748	0.513	0.605608	no	glp1ncl1 / glp1	RNA-seq	mrp-3
WBGene00003410	-0.418697	0.0046	0.0120357	yes	glp1ncl1 / glp1	RNA-seq	mrp-4
WBGene00003411	-0.22171	0.03145	0.0642541	no	glp1ncl1 / glp1	RNA-seq	mrp-5
WBGene00003412	-0.0621826	0.60885	0.691438	no	glp1ncl1 / glp1	RNA-seq	mrp-6
WBGene00003413	-0.0379189	0.75865	0.817412	no	glp1ncl1 / glp1	RNA-seq	mrp-7
WBGene00003414	0.00953333	0.95785	0.968908	no	glp1ncl1 / glp1	RNA-seq	mrp-8
WBGene00003415	0.950631	5e-05	0.000190833	yes	glp1ncl1 / glp1	RNA-seq	mars-1
WBGene00003417	-0.0165481	0.9472	0.961293	no	glp1ncl1 / glp1	RNA-seq	mrt-2
WBGene00003418	1.81387	5e-05	0.000190833	yes	glp1ncl1 / glp1	RNA-seq	msh-2
WBGene00003421	0.421593	0.13405	0.211552	no	glp1ncl1 / glp1	RNA-seq	msh-5
WBGene00003422	1.50182	5e-05	0.000190833	yes	glp1ncl1 / glp1	RNA-seq	msh-6
WBGene00003423	-0.447627	0.00325	0.00883451	yes	glp1ncl1 / glp1	RNA-seq	msi-1
WBGene00003424	1.2921	0.02325	0.0495747	yes	glp1ncl1 / glp1	RNA-seq	msp-3
WBGene00003426	0.234706	0.64225	0.720452	no	glp1ncl1 / glp1	RNA-seq	msp-19
WBGene00003429	0.710072	0.64695	0.724512	no	glp1ncl1 / glp1	RNA-seq	msp-31
WBGene00003431	0.970986	0.18365	0.270995	no	glp1ncl1 / glp1	RNA-seq	msp-33
WBGene00003432	0.507605	0.2715	0.366034	no	glp1ncl1 / glp1	RNA-seq	msp-36
WBGene00003434	1.05694	0.0207	0.0448898	yes	glp1ncl1 / glp1	RNA-seq	msp-38
WBGene00003435	1.68408	0.00435	0.0114497	yes	glp1ncl1 / glp1	RNA-seq	msp-40
WBGene00003438	0.44109	0.67775	0.750729	no	glp1ncl1 / glp1	RNA-seq	msp-45
WBGene00003442	0.580484	0.1629	0.246623	no	glp1ncl1 / glp1	RNA-seq	msp-49
WBGene00003443	0.685747	0.08525	0.147644	no	glp1ncl1 / glp1	RNA-seq	msp-50
WBGene00003444	-0.0758106	0.9232	0.94387	no	glp1ncl1 / glp1	RNA-seq	msp-51
WBGene00003446	2.18442	0.01305	0.0301134	yes	glp1ncl1 / glp1	RNA-seq	msp-53
WBGene00003448	1.55706	0.0054	0.0138704	yes	glp1ncl1 / glp1	RNA-seq	msp-55
WBGene00003449	1.14891	0.1232	0.198058	no	glp1ncl1 / glp1	RNA-seq	msp-56
WBGene00003450	0.316763	0.49435	0.588348	no	glp1ncl1 / glp1	RNA-seq	msp-57
WBGene00003452	0.660729	0.17065	0.255777	no	glp1ncl1 / glp1	RNA-seq	msp-59
WBGene00003457	1.07889	0.06835	0.123255	no	glp1ncl1 / glp1	RNA-seq	msp-64
WBGene00003458	3.49429	0.22935	0.322049	no	glp1ncl1 / glp1	RNA-seq	msp-65
WBGene00003463	0.578628	0.20125	0.291136	no	glp1ncl1 / glp1	RNA-seq	msp-76
WBGene00003464	1.17954	0.02365	0.0503067	no	glp1ncl1 / glp1	RNA-seq	msp-77
WBGene00003465	0.761656	0.0784	0.137981	no	glp1ncl1 / glp1	RNA-seq	msp-78
WBGene00003466	-0.109126	0.91275	0.936154	no	glp1ncl1 / glp1	RNA-seq	msp-79
WBGene00003467	0.162576	0.70885	0.776807	no	glp1ncl1 / glp1	RNA-seq	msp-81
WBGene00003468	1.24533	0.207	0.297664	no	glp1ncl1 / glp1	RNA-seq	msp-113
WBGene00003469	1.19892	0.011	0.0259447	yes	glp1ncl1 / glp1	RNA-seq	msp-142
WBGene00003470	1.16903	0.01595	0.0358474	yes	glp1ncl1 / glp1	RNA-seq	msp-152
WBGene00003471	-0.0742328	0.8323	0.875754	no	glp1ncl1 / glp1	RNA-seq	mtd-1
WBGene00003472	-0.0539413	0.6276	0.707736	no	glp1ncl1 / glp1	RNA-seq	mtk-1
WBGene00003473	-1.34979	5e-05	0.000190833	yes	glp1ncl1 / glp1	RNA-seq	mtl-1
WBGene00003474	-1.06768	5e-05	0.000190833	yes	glp1ncl1 / glp1	RNA-seq	mtl-2
WBGene00003475	0.148184	0.25245	0.345623	no	glp1ncl1 / glp1	RNA-seq	mtm-1
WBGene00003476	-0.122795	0.26565	0.359775	no	glp1ncl1 / glp1	RNA-seq	mtm-3
WBGene00003477	-0.124678	0.27665	0.371569	no	glp1ncl1 / glp1	RNA-seq	mtm-5
WBGene00003478	0.0661343	0.62555	0.705933	no	glp1ncl1 / glp1	RNA-seq	mtm-6
WBGene00003479	0.0135276	0.93875	0.955178	no	glp1ncl1 / glp1	RNA-seq	mtm-9
WBGene00003480	-0.168004	0.4589	0.55503	no	glp1ncl1 / glp1	RNA-seq	klf-3
WBGene00003482	-0.0220787	0.82905	0.873219	no	glp1ncl1 / glp1	RNA-seq	mua-3
WBGene00003485	0.0827688	0.422	0.519533	no	glp1ncl1 / glp1	RNA-seq	mua-6
WBGene00003495	-0.221221	0.04035	0.0793563	no	glp1ncl1 / glp1	RNA-seq	mup-2
WBGene00003497	-0.0906527	0.38545	0.483526	no	glp1ncl1 / glp1	RNA-seq	mup-4
WBGene00003499	-0.233046	0.84985	0.889313	no	glp1ncl1 / glp1	RNA-seq	mut-2
WBGene00003504	0.743011	0.0001	0.000367464	yes	glp1ncl1 / glp1	RNA-seq	mut-7
WBGene00003507	0.0795704	0.5922	0.676776	no	glp1ncl1 / glp1	RNA-seq	mut-14
WBGene00003508	-0.226948	0.1722	0.257625	no	glp1ncl1 / glp1	RNA-seq	mut-16
WBGene00003509	-0.251454	0.22795	0.320545	no	glp1ncl1 / glp1	RNA-seq	mxl-1
WBGene00003510	0.192342	0.25825	0.351751	no	glp1ncl1 / glp1	RNA-seq	mxl-2
WBGene00003511	-0.0452709	0.7011	0.770383	no	glp1ncl1 / glp1	RNA-seq	mxl-3
WBGene00003514	0.0748372	0.4702	0.565687	no	glp1ncl1 / glp1	RNA-seq	myo-2
WBGene00003515	0.0938847	0.3706	0.468826	no	glp1ncl1 / glp1	RNA-seq	myo-3
WBGene00003516	-0.0595197	0.6693	0.743518	no	glp1ncl1 / glp1	RNA-seq	nab-1
WBGene00003517	-0.0265149	0.84775	0.887645	no	glp1ncl1 / glp1	RNA-seq	nac-1
WBGene00003518	0.0382314	0.7911	0.843447	no	glp1ncl1 / glp1	RNA-seq	nac-2
WBGene00003519	-0.136057	0.3137	0.410589	no	glp1ncl1 / glp1	RNA-seq	nac-3
WBGene00003522	-0.295527	0.093	0.158313	no	glp1ncl1 / glp1	RNA-seq	nas-3
WBGene00003523	0.335804	0.38055	0.478672	no	glp1ncl1 / glp1	RNA-seq	nas-4
WBGene00003524	0.00913811	0.96555	0.974394	no	glp1ncl1 / glp1	RNA-seq	nas-5
WBGene00003525	-2.08246	0.20515	0.295621	no	glp1ncl1 / glp1	RNA-seq	nas-6
WBGene00003526	0.0397079	0.85765	0.895263	no	glp1ncl1 / glp1	RNA-seq	nas-7
WBGene00003527	-0.121085	0.7175	0.784008	no	glp1ncl1 / glp1	RNA-seq	nas-8
WBGene00003528	-0.229844	0.05385	0.101119	no	glp1ncl1 / glp1	RNA-seq	nas-9
WBGene00003530	0.0750411	0.47695	0.572043	no	glp1ncl1 / glp1	RNA-seq	nas-11
WBGene00003533	1.02829	0.07625	0.134866	no	glp1ncl1 / glp1	RNA-seq	nas-14
WBGene00003539	-0.183484	0.0915	0.156387	no	glp1ncl1 / glp1	RNA-seq	nas-20
WBGene00003540	-0.374264	0.26895	0.363295	no	glp1ncl1 / glp1	RNA-seq	nas-21
WBGene00003541	0.22714	0.78605	0.839408	no	glp1ncl1 / glp1	RNA-seq	nas-22
WBGene00003544	-0.0346242	0.93515	0.952628	no	glp1ncl1 / glp1	RNA-seq	nas-25
WBGene00003545	0.0529861	0.87085	0.905302	no	glp1ncl1 / glp1	RNA-seq	nas-27
WBGene00003546	-0.346232	0.46445	0.560303	no	glp1ncl1 / glp1	RNA-seq	nas-28
WBGene00003548	0.111057	0.77565	0.831105	no	glp1ncl1 / glp1	RNA-seq	nas-30
WBGene00003549	-0.418761	0.08435	0.146371	no	glp1ncl1 / glp1	RNA-seq	nas-31
WBGene00003550	-0.256691	0.20595	0.296542	no	glp1ncl1 / glp1	RNA-seq	nas-32
WBGene00003551	-0.414308	0.16125	0.244616	no	glp1ncl1 / glp1	RNA-seq	nas-33
WBGene00003552	0.0770006	0.8028	0.852725	no	glp1ncl1 / glp1	RNA-seq	nas-36
WBGene00003553	0.211338	0.0535	0.100586	no	glp1ncl1 / glp1	RNA-seq	nas-37
WBGene00003554	-0.326971	0.24425	0.337582	no	glp1ncl1 / glp1	RNA-seq	nas-38
WBGene00003555	-0.190362	0.1524	0.233941	no	glp1ncl1 / glp1	RNA-seq	F38E9.1,nas-39
WBGene00003558	0.00147711	0.9937	0.995011	no	glp1ncl1 / glp1	RNA-seq	nca-2
WBGene00003559	-1.21257	5e-05	0.000190833	yes	glp1ncl1 / glp1	RNA-seq	ncl-1
WBGene00003561	-0.108832	0.36595	0.464166	no	glp1ncl1 / glp1	RNA-seq	ncr-1
WBGene00003562	0.1109	0.86175	0.898441	no	glp1ncl1 / glp1	RNA-seq	ncr-2
WBGene00003563	-0.186994	0.7883	0.841147	no	glp1ncl1 / glp1	RNA-seq	ncs-1
WBGene00003564	-0.140741	0.3471	0.44499	no	glp1ncl1 / glp1	RNA-seq	ncs-2
WBGene00003565	-0.109918	0.67605	0.749322	no	glp1ncl1 / glp1	RNA-seq	ncs-3
WBGene00003566	-0.379706	0.0231	0.0493038	yes	glp1ncl1 / glp1	RNA-seq	ncx-1
WBGene00003567	0.0880795	0.4432	0.539947	no	glp1ncl1 / glp1	RNA-seq	ncx-2
WBGene00003568	0.25401	0.10125	0.169669	no	glp1ncl1 / glp1	RNA-seq	ncx-3
WBGene00003569	-0.228435	0.3555	0.453572	no	glp1ncl1 / glp1	RNA-seq	ncx-4
WBGene00003571	-0.62197	0.03245	0.0659677	no	glp1ncl1 / glp1	RNA-seq	ncx-6
WBGene00003572	-0.254157	0.04945	0.0941573	no	glp1ncl1 / glp1	RNA-seq	ncx-7
WBGene00003573	0.0568916	0.7966	0.84775	no	glp1ncl1 / glp1	RNA-seq	ncx-8
WBGene00003574	0.254411	0.40715	0.504915	no	glp1ncl1 / glp1	RNA-seq	ncx-9
WBGene00003575	-0.471261	0.2329	0.32584	no	glp1ncl1 / glp1	RNA-seq	ncx-10
WBGene00003576	0.724091	0.0183	0.0403707	yes	glp1ncl1 / glp1	RNA-seq	ndc-80
WBGene00003577	-0.284775	0.00795	0.0195099	yes	glp1ncl1 / glp1	RNA-seq	ndg-4
WBGene00003578	-0.0240044	0.8952	0.923218	no	glp1ncl1 / glp1	RNA-seq	ndx-1
WBGene00003579	0.215215	0.31715	0.414225	no	glp1ncl1 / glp1	RNA-seq	ndx-2
WBGene00003580	0.102607	0.71875	0.785033	no	glp1ncl1 / glp1	RNA-seq	ndx-3
WBGene00003581	0.0264836	0.8465	0.886699	no	glp1ncl1 / glp1	RNA-seq	ndx-4
WBGene00003582	0.133115	0.48885	0.583192	no	glp1ncl1 / glp1	RNA-seq	dcap-2
WBGene00003583	0.278604	0.07725	0.136302	no	glp1ncl1 / glp1	RNA-seq	ndx-6,rsp-4
WBGene00003584	-0.0900319	0.54665	0.636153	no	glp1ncl1 / glp1	RNA-seq	ndx-7
WBGene00003585	0.158262	0.51705	0.609346	no	glp1ncl1 / glp1	RNA-seq	ndx-8
WBGene00003586	-0.0766995	0.7219	0.787597	no	glp1ncl1 / glp1	RNA-seq	ndx-9
WBGene00003587	0.164823	0.2226	0.314792	no	glp1ncl1 / glp1	RNA-seq	ned-8
WBGene00003588	0.00746286	0.94455	0.959384	no	glp1ncl1 / glp1	RNA-seq	nex-1
WBGene00003589	0.12144	0.2616	0.355372	no	glp1ncl1 / glp1	RNA-seq	nex-2
WBGene00003590	0.253201	0.0241	0.051129	no	glp1ncl1 / glp1	RNA-seq	nex-3
WBGene00003591	-0.517391	0.50625	0.599369	no	glp1ncl1 / glp1	RNA-seq	nex-4
WBGene00003592	0.165955	0.2025	0.292554	no	glp1ncl1 / glp1	RNA-seq	nfi-1
WBGene00003593	-0.0868231	0.4882	0.582575	no	glp1ncl1 / glp1	RNA-seq	nfm-1
WBGene00003594	-0.0210615	0.86645	0.901983	no	glp1ncl1 / glp1	RNA-seq	nft-1
WBGene00003596	2.55731	5e-05	0.000190833	yes	glp1ncl1 / glp1	RNA-seq	ngp-1
WBGene00003597	0.151557	0.26565	0.359775	no	glp1ncl1 / glp1	RNA-seq	nhl-1
WBGene00003598	0.612126	0.0001	0.000367464	yes	glp1ncl1 / glp1	RNA-seq	nhl-2
WBGene00003599	0.158585	0.31095	0.407744	no	glp1ncl1 / glp1	RNA-seq	nhl-3
WBGene00003600	-0.211355	0.17045	0.255551	no	glp1ncl1 / glp1	RNA-seq	nhr-1
WBGene00003602	0.110002	0.45285	0.549242	no	glp1ncl1 / glp1	RNA-seq	nhr-3
WBGene00003603	-0.243732	0.11715	0.190582	no	glp1ncl1 / glp1	RNA-seq	nhr-4
WBGene00003604	-0.170635	0.31025	0.407011	no	glp1ncl1 / glp1	RNA-seq	nhr-5
WBGene00003606	-0.291544	0.23075	0.32351	no	glp1ncl1 / glp1	RNA-seq	nhr-7
WBGene00003607	-0.60252	0.00255	0.00711629	yes	glp1ncl1 / glp1	RNA-seq	nhr-8
WBGene00003609	-0.00866727	0.9505	0.963664	no	glp1ncl1 / glp1	RNA-seq	nhr-10
WBGene00003610	-0.277918	0.10895	0.18009	no	glp1ncl1 / glp1	RNA-seq	nhr-11
WBGene00003611	0.131673	0.56815	0.655386	no	glp1ncl1 / glp1	RNA-seq	nhr-12
WBGene00003612	-0.133409	0.49135	0.585541	no	glp1ncl1 / glp1	RNA-seq	nhr-13
WBGene00003613	-0.35791	0.094	0.159676	no	glp1ncl1 / glp1	RNA-seq	nhr-14
WBGene00003614	-0.102276	0.8074	0.85634	no	glp1ncl1 / glp1	RNA-seq	nhr-15
WBGene00003615	-0.120196	0.59725	0.681288	no	glp1ncl1 / glp1	RNA-seq	nhr-16
WBGene00003616	-0.0951188	0.6075	0.690237	no	glp1ncl1 / glp1	RNA-seq	nhr-17
WBGene00003617	0.0604646	0.7508	0.811004	no	glp1ncl1 / glp1	RNA-seq	nhr-18
WBGene00003618	0.747302	0.0548	0.102585	no	glp1ncl1 / glp1	RNA-seq	nhr-19
WBGene00003619	-0.0373347	0.83695	0.879358	no	glp1ncl1 / glp1	RNA-seq	nhr-20
WBGene00003620	0.165933	0.3963	0.494249	no	glp1ncl1 / glp1	RNA-seq	nhr-21
WBGene00003621	-0.128222	0.39155	0.489577	no	glp1ncl1 / glp1	RNA-seq	nhr-22
WBGene00003622	0.465291	0.24695	0.340227	no	glp1ncl1 / glp1	RNA-seq	nhr-23
WBGene00003623	-0.0280413	0.93065	0.949313	no	glp1ncl1 / glp1	RNA-seq	nhr-25
WBGene00003624	-0.139723	0.3004	0.396717	no	glp1ncl1 / glp1	RNA-seq	nhr-28
WBGene00003625	-0.210348	0.06385	0.116516	no	glp1ncl1 / glp1	RNA-seq	nhr-31
WBGene00003626	-0.355927	0.0581	0.107734	no	glp1ncl1 / glp1	RNA-seq	nhr-32
WBGene00003627	-0.153035	0.26045	0.354114	no	glp1ncl1 / glp1	RNA-seq	nhr-34
WBGene00003628	-0.523752	0.00345	0.00931798	yes	glp1ncl1 / glp1	RNA-seq	nhr-35
WBGene00003630	-0.180488	0.18905	0.27715	no	glp1ncl1 / glp1	RNA-seq	nhr-40
WBGene00003632	-0.0990315	0.7085	0.776531	no	glp1ncl1 / glp1	RNA-seq	nhr-42
WBGene00003633	-0.593517	0.03825	0.0758633	no	glp1ncl1 / glp1	RNA-seq	nhr-43
WBGene00003634	-0.375155	0.3538	0.451813	no	glp1ncl1 / glp1	RNA-seq	nhr-44
WBGene00003635	-0.232397	0.0951	0.161199	no	glp1ncl1 / glp1	RNA-seq	nhr-45
WBGene00003636	-0.180856	0.24195	0.335254	no	glp1ncl1 / glp1	RNA-seq	nhr-46
WBGene00003637	0.0307638	0.95315	0.965581	no	glp1ncl1 / glp1	RNA-seq	nhr-47
WBGene00003638	-0.225913	0.12195	0.196522	no	glp1ncl1 / glp1	RNA-seq	nhr-48
WBGene00003639	-0.149051	0.20995	0.300815	no	glp1ncl1 / glp1	RNA-seq	nhr-49
WBGene00003640	-0.0921714	0.7403	0.802526	no	glp1ncl1 / glp1	RNA-seq	nhr-50
WBGene00003643	0.138822	0.68675	0.758287	no	glp1ncl1 / glp1	RNA-seq	nhr-53
WBGene00003644	0.0511983	0.8627	0.89918	no	glp1ncl1 / glp1	RNA-seq	nhr-54
WBGene00003645	-0.398046	0.01995	0.0434835	yes	glp1ncl1 / glp1	RNA-seq	nhr-55
WBGene00003646	-0.0655874	0.7914	0.843674	no	glp1ncl1 / glp1	RNA-seq	nhr-56
WBGene00003647	-0.0815708	0.76095	0.819278	no	glp1ncl1 / glp1	RNA-seq	nhr-57
WBGene00003648	0.333781	0.1628	0.246508	no	glp1ncl1 / glp1	RNA-seq	nhr-58
WBGene00003649	0.14273	0.63305	0.71253	no	glp1ncl1 / glp1	RNA-seq	nhr-59
WBGene00003650	0.158368	0.6845	0.756388	no	glp1ncl1 / glp1	RNA-seq	nhr-60
WBGene00003651	0.137101	0.9143	0.937303	no	glp1ncl1 / glp1	RNA-seq	nhr-61
WBGene00003652	-0.0323158	0.8546	0.892943	no	glp1ncl1 / glp1	RNA-seq	nhr-62
WBGene00003653	0.331643	0.25195	0.345111	no	glp1ncl1 / glp1	RNA-seq	nhr-63
WBGene00003654	-0.160933	0.3322	0.42979	no	glp1ncl1 / glp1	RNA-seq	nhr-64
WBGene00003655	-0.361778	0.0607	0.111731	no	glp1ncl1 / glp1	RNA-seq	nhr-65
WBGene00003656	0.0766978	0.62335	0.703995	no	glp1ncl1 / glp1	RNA-seq	nhr-66
WBGene00003657	-0.517102	0.2648	0.358846	no	glp1ncl1 / glp1	RNA-seq	nhr-67
WBGene00003658	-0.25641	0.04485	0.0867809	no	glp1ncl1 / glp1	RNA-seq	nhr-68
WBGene00003659	-0.11561	0.3597	0.457833	no	glp1ncl1 / glp1	RNA-seq	nhr-69
WBGene00003660	0.017304	0.9107	0.934665	no	glp1ncl1 / glp1	RNA-seq	nhr-70
WBGene00003661	-0.162416	0.32375	0.421068	no	glp1ncl1 / glp1	RNA-seq	nhr-71
WBGene00003663	0.835822	0.1301	0.206837	no	glp1ncl1 / glp1	RNA-seq	nhr-73
WBGene00003664	-0.835142	0.0035	0.00943785	yes	glp1ncl1 / glp1	RNA-seq	nhr-74
WBGene00003668	-0.302363	0.2523	0.345466	no	glp1ncl1 / glp1	RNA-seq	nhr-78
WBGene00003669	-0.161662	0.4189	0.516501	no	glp1ncl1 / glp1	RNA-seq	nhr-79
WBGene00003670	-0.366305	0.00685	0.0171139	yes	glp1ncl1 / glp1	RNA-seq	nhr-80
WBGene00003674	-0.111667	0.58	0.666007	no	glp1ncl1 / glp1	RNA-seq	nhr-84
WBGene00003675	-0.557338	0.13565	0.213344	no	glp1ncl1 / glp1	RNA-seq	nhr-85
WBGene00003676	-0.0238876	0.8969	0.924496	no	glp1ncl1 / glp1	RNA-seq	nhr-86
WBGene00003677	-0.122902	0.6322	0.711786	no	glp1ncl1 / glp1	RNA-seq	nhr-87
WBGene00003678	-0.354618	0.0086	0.0209064	yes	glp1ncl1 / glp1	RNA-seq	nhr-88
WBGene00003680	0.0857213	0.65555	0.731751	no	glp1ncl1 / glp1	RNA-seq	nhr-90
WBGene00003681	-0.253761	0.4237	0.521195	no	glp1ncl1 / glp1	RNA-seq	nhr-91
WBGene00003682	-0.0468099	0.81715	0.864079	no	glp1ncl1 / glp1	RNA-seq	nhr-92
WBGene00003683	0.235882	0.508	0.600995	no	glp1ncl1 / glp1	RNA-seq	nhr-93
WBGene00003684	0.352456	0.1907	0.279055	no	glp1ncl1 / glp1	RNA-seq	nhr-94
WBGene00003685	-0.161926	0.33025	0.427767	no	glp1ncl1 / glp1	RNA-seq	nhr-95
WBGene00003686	-0.119471	0.53355	0.624385	no	glp1ncl1 / glp1	RNA-seq	nhr-96
WBGene00003687	-0.0477798	0.65055	0.727471	no	glp1ncl1 / glp1	RNA-seq	nhr-97
WBGene00003688	0.186062	0.54085	0.630936	no	glp1ncl1 / glp1	RNA-seq	nhr-98
WBGene00003689	0.0438441	0.8683	0.903385	no	glp1ncl1 / glp1	RNA-seq	nhr-99
WBGene00003690	0.0109213	0.9349	0.952444	no	glp1ncl1 / glp1	RNA-seq	nhr-100
WBGene00003691	-0.0607603	0.7543	0.813903	no	glp1ncl1 / glp1	RNA-seq	nhr-101
WBGene00003692	0.204988	0.4057	0.503474	no	glp1ncl1 / glp1	RNA-seq	nhr-102
WBGene00003693	-0.444114	0.0923	0.15747	no	glp1ncl1 / glp1	RNA-seq	nhr-103
WBGene00003694	-0.340073	0.0406	0.0797719	no	glp1ncl1 / glp1	RNA-seq	nhr-104
WBGene00003695	-0.118528	0.4576	0.553757	no	glp1ncl1 / glp1	RNA-seq	nhr-105
WBGene00003696	0.0524722	0.8223	0.867991	no	glp1ncl1 / glp1	RNA-seq	nhr-106
WBGene00003697	-0.438294	0.04665	0.0896962	no	glp1ncl1 / glp1	RNA-seq	nhr-107
WBGene00003698	-0.0864707	0.7789	0.833721	no	glp1ncl1 / glp1	RNA-seq	nhr-108
WBGene00003699	-0.195075	0.2395	0.332752	no	glp1ncl1 / glp1	RNA-seq	nhr-109,nhr-273
WBGene00003700	0.0375326	0.84485	0.885387	no	glp1ncl1 / glp1	RNA-seq	nhr-110
WBGene00003702	0.891874	0.0011	0.00333997	yes	glp1ncl1 / glp1	RNA-seq	nhr-112
WBGene00003704	-0.0517911	0.6595	0.735096	no	glp1ncl1 / glp1	RNA-seq	nhr-114
WBGene00003705	-0.415421	0.26375	0.357683	no	glp1ncl1 / glp1	RNA-seq	nhr-115
WBGene00003706	-0.169269	0.44085	0.537723	no	glp1ncl1 / glp1	RNA-seq	nhr-116
WBGene00003707	0.176316	0.3549	0.452948	no	glp1ncl1 / glp1	RNA-seq	nhr-117
WBGene00003709	-0.268984	0.05995	0.110596	no	glp1ncl1 / glp1	RNA-seq	nhr-119
WBGene00003710	-0.184644	0.36275	0.46092	no	glp1ncl1 / glp1	RNA-seq	nhr-120
[truncated: 11,039 more rows]

## Sheet: Proteomics
ensembl_gene_id	log2(fold_change)	p_value	q_value	significant	comparison	technique	gene
WBGene00000001	0.572385	0.172664	0.363166	no	glp1ncl1 / glp1	Proteomics	aap-1
WBGene00000024	0.320872	0.522648	0.707371	no	glp1ncl1 / glp1	Proteomics	abu-1
WBGene00000040	-0.112935	0.0347765	0.122561	no	glp1ncl1 / glp1	Proteomics	aco-1
WBGene00000041	0.108551	0.0498614	0.15786	no	glp1ncl1 / glp1	Proteomics	aco-2
WBGene00000063	-0.15369	0.201996	0.402148	no	glp1ncl1 / glp1	Proteomics	act-1
WBGene00000066	-0.178739	0.0144334	0.0634738	no	glp1ncl1 / glp1	Proteomics	act-4
WBGene00000067	-0.303074	0.00470871	0.0283451	yes	glp1ncl1 / glp1	Proteomics	act-5
WBGene00000079	0.161178	0.0925272	0.241775	no	glp1ncl1 / glp1	Proteomics	adr-1
WBGene00000081	-0.24075	0.00629054	0.0349703	yes	glp1ncl1 / glp1	Proteomics	ads-1
WBGene00000098	-0.753978	0.00552835	0.0319559	yes	glp1ncl1 / glp1	Proteomics	air-1
WBGene00000100	-0.245137	0.021506	0.0855752	no	glp1ncl1 / glp1	Proteomics	ajm-1
WBGene00000102	-0.408594	0.00181153	0.0134849	yes	glp1ncl1 / glp1	Proteomics	akt-1
WBGene00000105	-0.218774	0.0133613	0.0597928	no	glp1ncl1 / glp1	Proteomics	alg-1
WBGene00000107	-0.0803056	0.115139	0.279336	no	glp1ncl1 / glp1	Proteomics	alh-1
WBGene00000109	-0.0337639	0.55748	0.728663	no	glp1ncl1 / glp1	Proteomics	alh-3
WBGene00000110	-0.195941	0.0126068	0.0574735	no	glp1ncl1 / glp1	Proteomics	alh-4,atp-4
WBGene00000111	0.129248	0.753086	0.864717	no	glp1ncl1 / glp1	Proteomics	alh-5
WBGene00000112	0.0221656	0.741304	0.858293	no	glp1ncl1 / glp1	Proteomics	alh-6
WBGene00000113	-0.220729	0.00826074	0.0428884	yes	glp1ncl1 / glp1	Proteomics	alh-7
WBGene00000114	-0.097293	0.0784478	0.217459	no	glp1ncl1 / glp1	Proteomics	alh-8
WBGene00000115	-0.199563	0.0150617	0.0654819	no	glp1ncl1 / glp1	Proteomics	alh-9
WBGene00000116	-0.184249	0.0412238	0.138548	no	glp1ncl1 / glp1	Proteomics	alh-10
WBGene00000117	-0.212733	0.255497	0.464742	no	glp1ncl1 / glp1	Proteomics	alh-11
WBGene00000118	-0.374296	1.33857e-06	4.12659e-05	yes	glp1ncl1 / glp1	Proteomics	alh-12
WBGene00000120	0.875042	0.149201	0.332175	no	glp1ncl1 / glp1	Proteomics	aly-1
WBGene00000121	-1.00266	0.0551569	0.170107	no	glp1ncl1 / glp1	Proteomics	aly-2
WBGene00000122	0.204761	0.0351631	0.123212	no	glp1ncl1 / glp1	Proteomics	aly-3
WBGene00000123	0.195259	0.3461	0.55297	no	glp1ncl1 / glp1	Proteomics	ama-1
WBGene00000136	-0.0392381	0.945243	0.966783	no	glp1ncl1 / glp1	Proteomics	amt-4
WBGene00000140	-0.0413487	0.503768	0.693818	no	glp1ncl1 / glp1	Proteomics	anc-1
WBGene00000142	0.0584704	0.776576	0.875981	no	glp1ncl1 / glp1	Proteomics	aos-1
WBGene00000150	-0.19282	0.256904	0.466623	no	glp1ncl1 / glp1	Proteomics	apm-1
WBGene00000155	-0.274727	6.77691e-05	0.0010446	yes	glp1ncl1 / glp1	Proteomics	app-1
WBGene00000160	-0.0387749	0.445769	0.643865	no	glp1ncl1 / glp1	Proteomics	apb-1
WBGene00000161	-0.479023	0.205098	0.406179	no	glp1ncl1 / glp1	Proteomics	apa-2
WBGene00000175	-0.198375	0.270223	0.482575	no	glp1ncl1 / glp1	Proteomics	aqp-7
WBGene00000181	-0.114499	0.108276	0.267578	no	glp1ncl1 / glp1	Proteomics	ard-1
WBGene00000182	0.0401996	0.752878	0.864717	no	glp1ncl1 / glp1	Proteomics	arf-1.2
WBGene00000183	0.00713651	0.95866	0.973006	no	glp1ncl1 / glp1	Proteomics	arf-3
WBGene00000187	-0.0664584	0.845117	0.911412	no	glp1ncl1 / glp1	Proteomics	arl-1
WBGene00000192	-0.139569	0.501763	0.692619	no	glp1ncl1 / glp1	Proteomics	arl-8
WBGene00000197	0.455544	3.56603e-08	1.78419e-06	yes	glp1ncl1 / glp1	Proteomics	aars-2
WBGene00000198	-0.257769	0.106148	0.264979	no	glp1ncl1 / glp1	Proteomics	art-1
WBGene00000199	-0.0665781	0.469727	0.665865	no	glp1ncl1 / glp1	Proteomics	arx-1
WBGene00000200	-0.0732212	0.322124	0.529414	no	glp1ncl1 / glp1	Proteomics	arx-2
WBGene00000201	-0.100447	0.326189	0.533211	no	glp1ncl1 / glp1	Proteomics	arx-3
WBGene00000202	1.12773	0.000684797	0.00651091	yes	glp1ncl1 / glp1	Proteomics	exos-4.2
WBGene00000203	-0.401921	0.348683	0.555127	no	glp1ncl1 / glp1	Proteomics	arx-5
WBGene00000204	-0.11479	0.22025	0.425394	no	glp1ncl1 / glp1	Proteomics	arx-6
WBGene00000205	-0.0166701	0.887629	0.932715	no	glp1ncl1 / glp1	Proteomics	arx-7
WBGene00000206	0.478683	0.00281124	0.019108	yes	glp1ncl1 / glp1	Proteomics	asb-1
WBGene00000207	-0.252973	0.00129843	0.0105393	yes	glp1ncl1 / glp1	Proteomics	asb-2
WBGene00000209	-2.21321	0.000977233	0.00860138	yes	glp1ncl1 / glp1	Proteomics	asg-1
WBGene00000210	-0.0815928	0.481322	0.675384	no	glp1ncl1 / glp1	Proteomics	asg-2
WBGene00000214	-0.680574	7.00148e-06	0.000170955	yes	glp1ncl1 / glp1	Proteomics	asp-1
WBGene00000215	-0.483319	0.00210111	0.0152318	yes	glp1ncl1 / glp1	Proteomics	asp-2
WBGene00000216	-0.585248	3.48412e-05	0.000617043	yes	glp1ncl1 / glp1	Proteomics	asp-3
WBGene00000217	-0.315175	0.00543927	0.0315602	yes	glp1ncl1 / glp1	Proteomics	asp-4
WBGene00000218	-0.168573	0.0423517	0.140041	no	glp1ncl1 / glp1	Proteomics	asp-5
WBGene00000219	-0.439759	3.47422e-05	0.000617043	yes	glp1ncl1 / glp1	Proteomics	asp-6
WBGene00000224	0.0481227	0.705319	0.837756	no	glp1ncl1 / glp1	Proteomics	atgp-1
WBGene00000228	0.0199128	0.759144	0.868406	no	glp1ncl1 / glp1	Proteomics	atn-1
WBGene00000229	-0.069049	0.144798	0.324943	no	glp1ncl1 / glp1	Proteomics	atp-2
WBGene00000230	-0.0954268	0.0734975	0.208277	no	glp1ncl1 / glp1	Proteomics	atp-3
WBGene00000231	-0.0603665	0.323942	0.531258	no	glp1ncl1 / glp1	Proteomics	atx-2
WBGene00000235	-0.0680881	0.568089	0.736537	no	glp1ncl1 / glp1	Proteomics	baf-1
WBGene00000236	0.0170438	0.819206	0.89839	no	glp1ncl1 / glp1	Proteomics	bag-1
WBGene00000237	1.21709	0.272639	0.483929	no	glp1ncl1 / glp1	Proteomics	bam-2
WBGene00000239	0.132523	0.79109	0.88375	no	glp1ncl1 / glp1	Proteomics	bas-1
WBGene00000240	-0.270143	0.00140063	0.011155	yes	glp1ncl1 / glp1	Proteomics	pah-1
WBGene00000245	-0.167451	0.0127359	0.0578421	no	glp1ncl1 / glp1	Proteomics	bca-1
WBGene00000248	-0.132475	0.198837	0.398647	no	glp1ncl1 / glp1	Proteomics	ben-1
WBGene00000266	-0.135592	0.315175	0.523633	no	glp1ncl1 / glp1	Proteomics	bre-1
WBGene00000273	-0.377401	0.0429038	0.141559	no	glp1ncl1 / glp1	Proteomics	brp-1
WBGene00000276	1.97091	1.4534e-07	5.76076e-06	yes	glp1ncl1 / glp1	Proteomics	byn-1
WBGene00000281	-0.106267	0.295333	0.506096	no	glp1ncl1 / glp1	Proteomics	cah-3
WBGene00000282	-0.0308773	0.832497	0.905301	no	glp1ncl1 / glp1	Proteomics	cah-4
WBGene00000283	-0.286243	0.343493	0.550021	no	glp1ncl1 / glp1	Proteomics	cah-5
WBGene00000292	-0.119893	0.121164	0.287552	no	glp1ncl1 / glp1	Proteomics	cap-1
WBGene00000293	-0.0912484	0.227368	0.43101	no	glp1ncl1 / glp1	Proteomics	cap-2
WBGene00000294	-0.0461033	0.528874	0.711159	no	glp1ncl1 / glp1	Proteomics	cas-1
WBGene00000298	-0.145003	0.704966	0.837756	no	glp1ncl1 / glp1	Proteomics	cat-4
WBGene00000301	-0.392949	0.496058	0.686919	no	glp1ncl1 / glp1	Proteomics	cav-1
WBGene00000369	-0.151112	0.711612	0.841473	no	glp1ncl1 / glp1	Proteomics	ccf-1
WBGene00000370	0.152974	0.0633387	0.187316	no	glp1ncl1 / glp1	Proteomics	ccg-1
WBGene00000371	-0.207644	0.0806349	0.22171	no	glp1ncl1 / glp1	Proteomics	cco-1
WBGene00000376	-0.159214	0.285517	0.49709	no	glp1ncl1 / glp1	Proteomics	ccr-4
WBGene00000377	0.0835456	0.259738	0.470178	no	glp1ncl1 / glp1	Proteomics	cct-1
WBGene00000378	0.157784	0.0427524	0.141213	no	glp1ncl1 / glp1	Proteomics	cct-2
WBGene00000379	0.220031	0.00117141	0.00971505	yes	glp1ncl1 / glp1	Proteomics	cct-4
WBGene00000380	0.217285	0.00100549	0.00874291	yes	glp1ncl1 / glp1	Proteomics	cct-5
WBGene00000381	0.218715	0.00488917	0.029144	yes	glp1ncl1 / glp1	Proteomics	cct-6
WBGene00000390	0.0659082	0.664647	0.810429	no	glp1ncl1 / glp1	Proteomics	cdc-42
WBGene00000391	-0.249642	0.136821	0.311857	no	glp1ncl1 / glp1	Proteomics	cdd-1
WBGene00000392	-0.442611	3.00412e-05	0.000545748	yes	glp1ncl1 / glp1	Proteomics	cdd-2
WBGene00000405	0.0964346	0.76569	0.869054	no	glp1ncl1 / glp1	Proteomics	cdk-1
WBGene00000414	0.880917	0.072606	0.206134	no	glp1ncl1 / glp1	Proteomics	cec-1
WBGene00000424	-0.239721	0.0422906	0.140023	no	glp1ncl1 / glp1	Proteomics	ced-10
WBGene00000472	0.0810796	0.144201	0.32432	no	glp1ncl1 / glp1	Proteomics	cey-1
WBGene00000473	-0.489356	0.256229	0.465761	no	glp1ncl1 / glp1	Proteomics	cey-2
WBGene00000474	0.34059	0.40186	0.607733	no	glp1ncl1 / glp1	Proteomics	cey-3
WBGene00000475	0.0359241	0.542661	0.720137	no	glp1ncl1 / glp1	Proteomics	cey-4
WBGene00000479	0.0408619	0.702934	0.836396	no	glp1ncl1 / glp1	Proteomics	cgh-1
WBGene00000480	0.0522232	0.710383	0.840671	no	glp1ncl1 / glp1	Proteomics	cgp-1
WBGene00000502	0.141696	0.121738	0.28869	no	glp1ncl1 / glp1	Proteomics	chp-1
WBGene00000509	0.0939938	0.246866	0.456074	no	glp1ncl1 / glp1	Proteomics	cka-1
WBGene00000512	-0.0624517	0.505938	0.695865	no	glp1ncl1 / glp1	Proteomics	ckb-2
WBGene00000527	-0.166302	0.222437	0.426725	no	glp1ncl1 / glp1	Proteomics	cle-1
WBGene00000528	-0.986523	0.00952008	0.0471055	yes	glp1ncl1 / glp1	Proteomics	clh-1
WBGene00000534	-0.278006	0.0128876	0.0581847	no	glp1ncl1 / glp1	Proteomics	cpi-2
WBGene00000535	0.105051	0.486244	0.680118	no	glp1ncl1 / glp1	Proteomics	cpi-1
WBGene00000542	-0.108468	0.0867441	0.231602	no	glp1ncl1 / glp1	Proteomics	clp-1
WBGene00000545	-0.108921	0.739985	0.857436	no	glp1ncl1 / glp1	Proteomics	clp-4
WBGene00000547	-0.465244	0.162616	0.350004	no	glp1ncl1 / glp1	Proteomics	clp-7
WBGene00000549	0.417256	0.434599	0.635285	no	glp1ncl1 / glp1	Proteomics	cls-2
WBGene00000550	0.201086	0.00720985	0.0384022	yes	glp1ncl1 / glp1	Proteomics	clu-1
WBGene00000552	-0.0705319	0.55083	0.725404	no	glp1ncl1 / glp1	Proteomics	cmd-1
WBGene00000554	-0.0531012	0.921276	0.952162	no	glp1ncl1 / glp1	Proteomics	cnb-1
WBGene00000567	0.0421778	0.602498	0.763631	no	glp1ncl1 / glp1	Proteomics	cnx-1
WBGene00000597	-0.435929	2.16291e-05	0.000421382	yes	glp1ncl1 / glp1	Proteomics	col-8
WBGene00000608	-0.436554	0.000908608	0.00813218	yes	glp1ncl1 / glp1	Proteomics	col-19
WBGene00000609	-0.707262	0.000443083	0.00456855	yes	glp1ncl1 / glp1	Proteomics	col-20
WBGene00000639	-0.18882	0.208989	0.410711	no	glp1ncl1 / glp1	Proteomics	col-63
WBGene00000649	-0.605825	0.11437	0.278132	no	glp1ncl1 / glp1	Proteomics	col-73
WBGene00000656	-0.0839104	0.651543	0.801495	no	glp1ncl1 / glp1	Proteomics	col-80
WBGene00000667	-0.640194	1.95061e-05	0.000399547	yes	glp1ncl1 / glp1	Proteomics	col-92
WBGene00000673	-0.579112	0.00846584	0.0434248	yes	glp1ncl1 / glp1	Proteomics	col-98
WBGene00000677	-0.391643	0.00323225	0.0213988	yes	glp1ncl1 / glp1	Proteomics	col-103
WBGene00000680	-0.483123	0.000139582	0.0018522	yes	glp1ncl1 / glp1	Proteomics	col-106
WBGene00000693	-0.343566	0.00586281	0.0331972	yes	glp1ncl1 / glp1	Proteomics	col-119
WBGene00000696	-0.422826	0.0166335	0.0705114	no	glp1ncl1 / glp1	Proteomics	col-122
WBGene00000698	-0.77138	0.00420742	0.0260468	yes	glp1ncl1 / glp1	Proteomics	col-124
WBGene00000703	-1.72506	0.00418612	0.0259675	yes	glp1ncl1 / glp1	Proteomics	col-129
WBGene00000712	-1.86086	0.0146412	0.0641102	no	glp1ncl1 / glp1	Proteomics	col-139
WBGene00000713	-0.42789	0.000101742	0.0014647	yes	glp1ncl1 / glp1	Proteomics	col-140
WBGene00000716	-0.0243493	0.870157	0.921804	no	glp1ncl1 / glp1	Proteomics	col-143
WBGene00000722	0.420888	0.680873	0.821697	no	glp1ncl1 / glp1	Proteomics	col-149
WBGene00000733	-0.332452	0.736013	0.856064	no	glp1ncl1 / glp1	Proteomics	col-160
WBGene00000748	-0.74896	0.163696	0.351599	no	glp1ncl1 / glp1	Proteomics	col-175
WBGene00000751	-0.95866	0.0102073	0.0494489	yes	glp1ncl1 / glp1	Proteomics	col-178
WBGene00000754	-0.756043	0.00262191	0.0180723	yes	glp1ncl1 / glp1	Proteomics	col-181
WBGene00000757	-0.439217	0.00202446	0.0147462	yes	glp1ncl1 / glp1	Proteomics	col-184
WBGene00000761	-0.0399618	0.896144	0.937618	no	glp1ncl1 / glp1	Proteomics	coq-1
WBGene00000763	0.087145	0.494483	0.685982	no	glp1ncl1 / glp1	Proteomics	coq-3
WBGene00000764	-0.361079	0.113396	0.276647	no	glp1ncl1 / glp1	Proteomics	coq-4
WBGene00000765	-0.10959	0.154039	0.339687	no	glp1ncl1 / glp1	Proteomics	coq-5
WBGene00000766	-0.124591	0.0742678	0.209487	no	glp1ncl1 / glp1	Proteomics	coq-6
WBGene00000767	0.235905	0.160889	0.348158	no	glp1ncl1 / glp1	Proteomics	coq-8
WBGene00000768	0.0610204	0.481532	0.675384	no	glp1ncl1 / glp1	Proteomics	cor-1
WBGene00000773	0.861612	0.0176793	0.0740155	no	glp1ncl1 / glp1	Proteomics	cpf-1
WBGene00000774	-0.695933	0.289166	0.500919	no	glp1ncl1 / glp1	Proteomics	cpf-2
WBGene00000776	-0.369809	0.00153317	0.0117274	yes	glp1ncl1 / glp1	Proteomics	cpl-1
WBGene00000777	0.101945	0.332148	0.539437	no	glp1ncl1 / glp1	Proteomics	cpn-1
WBGene00000779	0.00568698	0.92678	0.955262	no	glp1ncl1 / glp1	Proteomics	cpn-3
WBGene00000780	0.241307	0.0036511	0.0235088	yes	glp1ncl1 / glp1	Proteomics	cpn-4
WBGene00000781	1.54715	0.00378304	0.0241545	yes	glp1ncl1 / glp1	Proteomics	cpr-1
WBGene00000784	1.05947	0.0152192	0.065792	no	glp1ncl1 / glp1	Proteomics	cpr-4
WBGene00000785	-0.061051	0.518161	0.703336	no	glp1ncl1 / glp1	Proteomics	cpr-5
WBGene00000786	-0.508957	0.00371699	0.0237825	yes	glp1ncl1 / glp1	Proteomics	cpr-6
WBGene00000787	0.0725631	0.381818	0.588838	no	glp1ncl1 / glp1	Proteomics	cps-6
WBGene00000788	-0.44491	0.000971811	0.00859701	yes	glp1ncl1 / glp1	Proteomics	cpz-1
WBGene00000789	-0.368018	0.00659718	0.0362108	yes	glp1ncl1 / glp1	Proteomics	cpz-2
WBGene00000794	0.738297	0.110299	0.27126	no	glp1ncl1 / glp1	Proteomics	crn-1
WBGene00000795	0.203465	0.155695	0.342103	no	glp1ncl1 / glp1	Proteomics	crn-2
WBGene00000800	-0.0411115	0.481347	0.675384	no	glp1ncl1 / glp1	Proteomics	cars-1
WBGene00000802	-0.0527585	0.56462	0.733576	no	glp1ncl1 / glp1	Proteomics	crt-1
WBGene00000813	-0.77431	0.076269	0.212967	no	glp1ncl1 / glp1	Proteomics	csn-1
WBGene00000814	-1.38838	0.0235906	0.0918349	no	glp1ncl1 / glp1	Proteomics	csn-2
WBGene00000815	0.295591	0.378016	0.584746	no	glp1ncl1 / glp1	Proteomics	csn-3
WBGene00000818	-0.0681265	0.442796	0.642613	no	glp1ncl1 / glp1	Proteomics	csn-6
WBGene00000822	0.178244	0.0815703	0.223677	no	glp1ncl1 / glp1	Proteomics	csq-1
WBGene00000830	5.42626	3.578e-15	5.46002e-12	yes	glp1ncl1 / glp1	Proteomics	ctl-1
WBGene00000831	-0.32433	8.78502e-05	0.0013079	yes	glp1ncl1 / glp1	Proteomics	ctl-2
WBGene00000833	0.164658	0.00428775	0.0262249	yes	glp1ncl1 / glp1	Proteomics	cts-1
WBGene00000835	-0.259949	0.0206362	0.08353	no	glp1ncl1 / glp1	Proteomics	cuc-1
WBGene00000836	-0.0228298	0.843279	0.909963	no	glp1ncl1 / glp1	Proteomics	cul-1
WBGene00000837	0.624638	0.0485887	0.155118	no	glp1ncl1 / glp1	Proteomics	cul-2
WBGene00000843	-0.396143	0.662635	0.809833	no	glp1ncl1 / glp1	Proteomics	cup-2
WBGene00000869	0.0122927	0.863066	0.91972	no	glp1ncl1 / glp1	Proteomics	cyc-1
WBGene00000877	0.430073	6.8735e-06	0.000170552	yes	glp1ncl1 / glp1	Proteomics	cyn-1
WBGene00000879	-0.0763432	0.399587	0.606465	no	glp1ncl1 / glp1	Proteomics	bath-36,cyn-3
WBGene00000880	0.117171	0.444677	0.643506	no	glp1ncl1 / glp1	Proteomics	cyn-4
WBGene00000881	0.0510234	0.414297	0.618607	no	glp1ncl1 / glp1	Proteomics	cyn-5
WBGene00000882	0.0978826	0.304072	0.513574	no	glp1ncl1 / glp1	Proteomics	cyn-6
WBGene00000883	0.0947417	0.161845	0.349377	no	glp1ncl1 / glp1	Proteomics	cyn-7
WBGene00000886	-0.169557	0.750919	0.863854	no	glp1ncl1 / glp1	Proteomics	cyn-10
WBGene00000887	-0.223516	0.487976	0.6805	no	glp1ncl1 / glp1	Proteomics	cyn-11
WBGene00000888	0.00227181	0.983229	0.989389	no	glp1ncl1 / glp1	Proteomics	cyn-12
WBGene00000889	-0.081811	0.320001	0.527415	no	glp1ncl1 / glp1	Proteomics	cyn-13
WBGene00000891	-0.470996	0.236959	0.442054	no	glp1ncl1 / glp1	Proteomics	cyn-15
WBGene00000892	0.0383311	0.855935	0.916888	no	glp1ncl1 / glp1	Proteomics	cyn-16
WBGene00000894	0.00953364	0.984887	0.989751	no	glp1ncl1 / glp1	Proteomics	dab-1
WBGene00000915	0.193054	0.018971	0.0781371	no	glp1ncl1 / glp1	Proteomics	daf-21
WBGene00000923	0.070548	0.507208	0.695993	no	glp1ncl1 / glp1	Proteomics	daf-31
WBGene00000928	-0.0913994	0.530745	0.712328	no	glp1ncl1 / glp1	Proteomics	dao-2
WBGene00000929	-0.142243	0.0907048	0.238032	no	glp1ncl1 / glp1	Proteomics	dao-3
WBGene00000931	1.20219	7.56554e-11	8.88079e-09	yes	glp1ncl1 / glp1	Proteomics	dao-5
WBGene00000933	0.459378	0.00509972	0.0299739	yes	glp1ncl1 / glp1	Proteomics	dap-3
WBGene00000938	-0.0277191	0.906135	0.942578	no	glp1ncl1 / glp1	Proteomics	dcp-66
WBGene00000939	0.919175	0.269066	0.481636	no	glp1ncl1 / glp1	Proteomics	dcr-1
WBGene00000941	0.182673	0.0119263	0.0553706	no	glp1ncl1 / glp1	Proteomics	ddp-1
WBGene00000942	-0.0170663	0.811391	0.893672	no	glp1ncl1 / glp1	Proteomics	deb-1
WBGene00000961	0.0100912	0.901804	0.941526	no	glp1ncl1 / glp1	Proteomics	dgn-1
WBGene00000962	-0.053355	0.283754	0.494867	no	glp1ncl1 / glp1	Proteomics	T21E12.3,dhc-1
WBGene00000963	-0.147238	0.7026	0.836324	no	glp1ncl1 / glp1	Proteomics	dhp-1
WBGene00000964	0.384527	0.00010415	0.0014716	yes	glp1ncl1 / glp1	Proteomics	dhp-2
WBGene00000967	-0.350938	0.03137	0.112789	no	glp1ncl1 / glp1	Proteomics	dhs-3
WBGene00000970	-0.0981301	0.0891257	0.235308	no	glp1ncl1 / glp1	Proteomics	dhs-6
WBGene00000973	0.121199	0.271631	0.483929	no	glp1ncl1 / glp1	Proteomics	dhs-9
WBGene00000974	-0.367914	0.525455	0.708969	no	glp1ncl1 / glp1	Proteomics	dhs-11
WBGene00000975	-0.170173	0.100128	0.255119	no	glp1ncl1 / glp1	Proteomics	dhs-12
WBGene00000976	0.264291	0.00036741	0.00397495	yes	glp1ncl1 / glp1	Proteomics	dhs-13
WBGene00000977	-0.163431	0.210037	0.41171	no	glp1ncl1 / glp1	Proteomics	dhs-14
WBGene00000981	-1.26373	0.1504	0.33359	no	glp1ncl1 / glp1	Proteomics	dhs-18
WBGene00000982	-0.165739	0.184423	0.380527	no	glp1ncl1 / glp1	Proteomics	dhs-19
WBGene00000984	-0.253482	0.0113562	0.0539862	no	glp1ncl1 / glp1	Proteomics	dhs-21
WBGene00000985	-0.181704	0.131994	0.303327	no	glp1ncl1 / glp1	Proteomics	dhs-22
WBGene00000987	0.20804	0.0536378	0.166873	no	glp1ncl1 / glp1	Proteomics	dhs-24
WBGene00000988	-0.0587829	0.605379	0.766527	no	glp1ncl1 / glp1	Proteomics	dhs-25
WBGene00000991	-0.262108	0.000301197	0.0034173	yes	glp1ncl1 / glp1	Proteomics	dhs-28
WBGene00000996	0.0282659	0.957367	0.973006	no	glp1ncl1 / glp1	Proteomics	dif-1
WBGene00000998	-0.0988122	0.0840034	0.226836	no	glp1ncl1 / glp1	Proteomics	dig-1
WBGene00001000	-0.0127009	0.832153	0.905301	no	glp1ncl1 / glp1	Proteomics	dim-1
WBGene00001001	0.27208	0.541452	0.719735	no	glp1ncl1 / glp1	Proteomics	dis-3
WBGene00001005	0.0500402	0.659434	0.80827	no	glp1ncl1 / glp1	Proteomics	dlc-1
WBGene00001006	-0.123396	0.172949	0.363166	no	glp1ncl1 / glp1	Proteomics	dlg-1
WBGene00001007	-0.0504853	0.579808	0.74484	no	glp1ncl1 / glp1	Proteomics	dli-1
WBGene00001017	-0.121668	0.151614	0.335551	no	glp1ncl1 / glp1	Proteomics	dnc-1
WBGene00001018	0.0199955	0.704981	0.837756	no	glp1ncl1 / glp1	Proteomics	dnc-2
WBGene00001025	-0.302372	0.0065178	0.0360368	yes	glp1ncl1 / glp1	Proteomics	dnj-7
WBGene00001027	-0.0380702	0.91207	0.946646	no	glp1ncl1 / glp1	Proteomics	dnj-9
WBGene00001028	0.0684694	0.557048	0.728411	no	glp1ncl1 / glp1	Proteomics	dnj-10
WBGene00001029	0.258174	0.0143916	0.0633812	no	glp1ncl1 / glp1	Proteomics	dnj-11
WBGene00001030	0.0100435	0.883951	0.929962	no	glp1ncl1 / glp1	Proteomics	dnj-12
WBGene00001031	0.0768773	0.368924	0.576231	no	glp1ncl1 / glp1	Proteomics	dnj-13
WBGene00001034	-0.129822	0.108919	0.268659	no	glp1ncl1 / glp1	Proteomics	dnj-16
WBGene00001037	-0.0146639	0.835454	0.906114	no	glp1ncl1 / glp1	Proteomics	dnj-19
WBGene00001038	-0.239296	0.00081037	0.00744954	yes	glp1ncl1 / glp1	Proteomics	dnj-20
WBGene00001039	-0.146507	0.173845	0.364165	no	glp1ncl1 / glp1	Proteomics	dnj-21
WBGene00001043	-0.165525	0.118411	0.283221	no	glp1ncl1 / glp1	Proteomics	dnj-25
WBGene00001047	-0.174222	0.157875	0.344104	no	glp1ncl1 / glp1	Proteomics	dnj-29
WBGene00001048	0.166569	0.503148	0.693818	no	glp1ncl1 / glp1	Proteomics	dnj-30
WBGene00001051	0.629246	0.11623	0.280867	no	glp1ncl1 / glp1	Proteomics	C09G4.4,cks-1,mes-6
WBGene00001056	-0.274248	0.00412869	0.0257685	yes	glp1ncl1 / glp1	Proteomics	dpf-3
WBGene00001057	0.00777284	0.909138	0.944846	no	glp1ncl1 / glp1	Proteomics	dpf-4
WBGene00001058	-0.0429825	0.614417	0.772584	no	glp1ncl1 / glp1	Proteomics	dpf-5
WBGene00001073	-0.0402992	0.697384	0.833692	no	glp1ncl1 / glp1	Proteomics	dpy-11
WBGene00001077	-0.107609	0.340256	0.54735	no	glp1ncl1 / glp1	Proteomics	dpy-18
WBGene00001082	-0.717775	0.0740918	0.209184	no	glp1ncl1 / glp1	Proteomics	dpy-23
WBGene00001088	-0.243453	0.0211659	0.084886	no	glp1ncl1 / glp1	Proteomics	dpy-30
WBGene00001093	-0.209335	0.0227245	0.089031	no	glp1ncl1 / glp1	Proteomics	drp-1
WBGene00001094	0.177832	0.0278507	0.104295	no	glp1ncl1 / glp1	Proteomics	dars-1
WBGene00001099	-0.379912	0.000585311	0.00572554	yes	glp1ncl1 / glp1	Proteomics	dsc-4
WBGene00001113	0.179884	0.0260419	0.0988555	no	glp1ncl1 / glp1	Proteomics	dur-1
WBGene00001130	-0.14516	0.0753627	0.211598	no	glp1ncl1 / glp1	Proteomics	dyn-1
WBGene00001131	-1.20455	0.510729	0.698363	no	glp1ncl1 / glp1	Proteomics	dys-1
WBGene00001132	0.142239	0.0116659	0.054908	no	glp1ncl1 / glp1	Proteomics	alp-1
WBGene00001134	-0.0771082	0.390183	0.597211	no	glp1ncl1 / glp1	Proteomics	eat-3
WBGene00001137	-0.245695	0.0147972	0.0646803	no	glp1ncl1 / glp1	Proteomics	eat-6
WBGene00001149	-0.357731	2.4215e-05	0.000467747	yes	glp1ncl1 / glp1	Proteomics	bcat-1
WBGene00001151	0.390139	0.000142589	0.0018839	yes	glp1ncl1 / glp1	Proteomics	ech-2,tag-30
WBGene00001153	-0.169092	0.0192012	0.0788724	no	glp1ncl1 / glp1	Proteomics	ech-4
WBGene00001154	-0.0175323	0.764518	0.868856	no	glp1ncl1 / glp1	Proteomics	ech-5
WBGene00001155	-0.267454	0.00084613	0.00770374	yes	glp1ncl1 / glp1	Proteomics	ech-6
WBGene00001156	0.429952	0.036879	0.127793	no	glp1ncl1 / glp1	Proteomics	ech-7
WBGene00001166	0.0734688	0.613502	0.772584	no	glp1ncl1 / glp1	Proteomics	eftu-2
WBGene00001167	0.185712	0.0139117	0.0616234	no	glp1ncl1 / glp1	Proteomics	eef-2
WBGene00001168	0.0487392	0.436709	0.636806	no	glp1ncl1 / glp1	Proteomics	eef-1A.1
WBGene00001173	-0.166868	0.0139058	0.0616234	no	glp1ncl1 / glp1	Proteomics	egl-4
WBGene00001196	-0.298561	0.02623	0.0994158	no	glp1ncl1 / glp1	Proteomics	egl-30
WBGene00001209	0.182613	0.00233832	0.0164816	yes	glp1ncl1 / glp1	Proteomics	egl-45
WBGene00001215	-0.321388	0.119423	0.285346	no	glp1ncl1 / glp1	Proteomics	ego-2
WBGene00001224	-0.13771	0.103975	0.261212	no	glp1ncl1 / glp1	Proteomics	ehs-1
WBGene00001225	0.118834	0.102503	0.258759	no	glp1ncl1 / glp1	Proteomics	eif-3.B
WBGene00001226	0.253771	0.00137029	0.0109767	yes	glp1ncl1 / glp1	Proteomics	eif-3.C
WBGene00001227	0.261875	0.000800594	0.00740303	yes	glp1ncl1 / glp1	Proteomics	eif-3.D
WBGene00001228	0.202023	0.0100361	0.0489547	yes	glp1ncl1 / glp1	Proteomics	eif-3.E
WBGene00001229	0.152992	0.0979932	0.251786	no	glp1ncl1 / glp1	Proteomics	eif-3.F
WBGene00001230	0.308099	0.000265426	0.00308015	yes	glp1ncl1 / glp1	Proteomics	eif-3.G
WBGene00001231	0.200215	0.00529382	0.0308335	yes	glp1ncl1 / glp1	Proteomics	eif-3.H
WBGene00001232	0.148088	0.0596539	0.179905	no	glp1ncl1 / glp1	Proteomics	eif-3.I
WBGene00001233	0.234358	0.0345516	0.12205	no	glp1ncl1 / glp1	Proteomics	eif-3.K
WBGene00001234	0.666938	0.000211383	0.00262826	yes	glp1ncl1 / glp1	Proteomics	eif-6
WBGene00001235	0.00360753	0.969148	0.980261	no	glp1ncl1 / glp1	Proteomics	elb-1
WBGene00001236	-0.261546	0.00660035	0.0362108	yes	glp1ncl1 / glp1	Proteomics	elc-1
WBGene00001239	-0.377006	0.0369585	0.127888	no	glp1ncl1 / glp1	Proteomics	elo-1
WBGene00001244	0.906041	0.334573	0.541133	no	glp1ncl1 / glp1	Proteomics	elo-6
WBGene00001258	-0.205136	0.295856	0.506563	no	glp1ncl1 / glp1	Proteomics	emb-4
WBGene00001259	-0.492023	0.124407	0.292068	no	glp1ncl1 / glp1	Proteomics	emb-5
WBGene00001262	-0.293264	0.00577378	0.0328149	yes	glp1ncl1 / glp1	Proteomics	emb-8
WBGene00001263	-0.446126	0.169422	0.35933	no	glp1ncl1 / glp1	Proteomics	emb-9
WBGene00001303	1.31347	0.106199	0.264979	no	glp1ncl1 / glp1	Proteomics	emo-1
WBGene00001309	0.00842722	0.94294	0.965234	no	glp1ncl1 / glp1	Proteomics	emr-1
WBGene00001328	0.142647	0.00680756	0.0366923	yes	glp1ncl1 / glp1	Proteomics	epi-1
WBGene00001329	-0.0900292	0.213751	0.416051	no	glp1ncl1 / glp1	Proteomics	epn-1
WBGene00001330	-0.06588	0.322552	0.529504	no	glp1ncl1 / glp1	Proteomics	eps-8
WBGene00001333	-0.188136	0.00296674	0.0198563	yes	glp1ncl1 / glp1	Proteomics	erm-1
WBGene00001335	-0.26796	0.00673771	0.0366417	yes	glp1ncl1 / glp1	Proteomics	erp-1
WBGene00001336	0.19024	0.00190212	0.013955	yes	glp1ncl1 / glp1	Proteomics	qars-1
WBGene00001337	0.266921	3.63424e-05	0.000633812	yes	glp1ncl1 / glp1	Proteomics	ears-1
WBGene00001385	-0.0679419	0.514743	0.701766	no	glp1ncl1 / glp1	Proteomics	far-1
WBGene00001386	-0.143764	0.206764	0.408179	no	glp1ncl1 / glp1	Proteomics	far-2
WBGene00001387	-0.0610038	0.884656	0.930382	no	glp1ncl1 / glp1	Proteomics	far-3
WBGene00001390	0.211963	0.101009	0.255622	no	glp1ncl1 / glp1	Proteomics	far-6
WBGene00001391	0.0615062	0.834367	0.905579	no	glp1ncl1 / glp1	Proteomics	far-7
WBGene00001392	0.0111572	0.969662	0.980261	no	glp1ncl1 / glp1	Proteomics	far-8
WBGene00001393	-0.165985	0.330485	0.537942	no	glp1ncl1 / glp1	Proteomics	fat-1
WBGene00001394	-0.231974	0.162546	0.350004	no	glp1ncl1 / glp1	Proteomics	fat-2
WBGene00001396	-0.555055	0.00148956	0.0115384	yes	glp1ncl1 / glp1	Proteomics	fat-4
WBGene00001398	-0.651398	0.450443	0.647807	no	glp1ncl1 / glp1	Proteomics	fat-6
WBGene00001404	-0.0464209	0.60156	0.763077	no	glp1ncl1 / glp1	Proteomics	fbp-1
WBGene00001405	-0.151417	0.66435	0.81039	no	glp1ncl1 / glp1	Proteomics	fce-1
WBGene00001423	1.08558	7.53749e-12	1.3532e-09	yes	glp1ncl1 / glp1	Proteomics	fib-1
WBGene00001426	-0.001622	0.984169	0.989681	no	glp1ncl1 / glp1	Proteomics	fkb-1
WBGene00001427	0.140444	0.0824001	0.225023	no	glp1ncl1 / glp1	Proteomics	fkb-2
WBGene00001428	-0.0267353	0.745437	0.861297	no	glp1ncl1 / glp1	Proteomics	fkb-3
WBGene00001429	0.372669	0.00984653	0.0483145	yes	glp1ncl1 / glp1	Proteomics	fkb-4
WBGene00001430	0.526371	3.3015e-05	0.000592717	yes	glp1ncl1 / glp1	Proteomics	fkb-5
WBGene00001431	-0.0238201	0.71479	0.842618	no	glp1ncl1 / glp1	Proteomics	fkb-6
WBGene00001443	-0.0689057	0.786692	0.881742	no	glp1ncl1 / glp1	Proteomics	fli-1
WBGene00001480	0.0933087	0.526113	0.709223	no	glp1ncl1 / glp1	Proteomics	fmo-5
WBGene00001486	0.308249	0.320454	0.527807	no	glp1ncl1 / glp1	Proteomics	frh-1
WBGene00001488	-0.0334372	0.641703	0.794192	no	glp1ncl1 / glp1	Proteomics	frm-1
WBGene00001492	-0.079731	0.879814	0.927848	no	glp1ncl1 / glp1	Proteomics	frm-5.1
WBGene00001497	0.272503	0.00086123	0.00777655	yes	glp1ncl1 / glp1	Proteomics	fars-1
WBGene00001498	0.403936	1.62205e-06	4.90149e-05	yes	glp1ncl1 / glp1	Proteomics	fars-3
WBGene00001501	-0.322911	0.00218212	0.0157072	yes	glp1ncl1 / glp1	Proteomics	ftn-2
WBGene00001502	-0.101311	0.128084	0.297046	no	glp1ncl1 / glp1	Proteomics	ftt-2
WBGene00001503	0.0324067	0.544435	0.72119	no	glp1ncl1 / glp1	Proteomics	fum-1
WBGene00001509	-0.244787	0.0446884	0.146183	no	glp1ncl1 / glp1	Proteomics	fzo-1
WBGene00001513	-0.463675	0.396348	0.603318	no	glp1ncl1 / glp1	Proteomics	gad-1
WBGene00001520	0.0172172	0.753941	0.864873	no	glp1ncl1 / glp1	Proteomics	gas-1
WBGene00001526	0.072873	0.781023	0.877968	no	glp1ncl1 / glp1	Proteomics	gck-1
WBGene00001527	-0.154086	0.0408942	0.138174	no	glp1ncl1 / glp1	Proteomics	gcs-1
WBGene00001558	-0.00398707	0.943096	0.965234	no	glp1ncl1 / glp1	Proteomics	gdi-1
WBGene00001564	0.27629	0.0012945	0.0105355	yes	glp1ncl1 / glp1	Proteomics	icl-1
WBGene00001566	0.669089	0.0228388	0.0893641	no	glp1ncl1 / glp1	Proteomics	acdh-13
WBGene00001572	-0.201528	0.0118921	0.0553706	no	glp1ncl1 / glp1	Proteomics	gei-15
WBGene00001578	-0.165195	0.426638	0.628124	no	glp1ncl1 / glp1	Proteomics	ges-1
WBGene00001581	-0.434525	0.00788737	0.0416241	yes	glp1ncl1 / glp1	Proteomics	gfi-1
WBGene00001595	0.476678	0.221548	0.425958	no	glp1ncl1 / glp1	Proteomics	gld-1
WBGene00001596	-0.328353	0.525147	0.708969	no	glp1ncl1 / glp1	Proteomics	gld-2
WBGene00001598	1.29862	0.0302132	0.110168	no	glp1ncl1 / glp1	Proteomics	glh-1
WBGene00001599	0.328757	0.516926	0.702744	no	glp1ncl1 / glp1	Proteomics	glh-2
WBGene00001601	-0.367049	0.202941	0.403766	no	glp1ncl1 / glp1	Proteomics	glh-4
WBGene00001603	-0.728712	0.0187626	0.0774304	no	glp1ncl1 / glp1	Proteomics	gln-2
WBGene00001604	0.123938	0.0624138	0.185479	no	glp1ncl1 / glp1	Proteomics	gln-3
WBGene00001606	0.366946	0.423664	0.625859	no	glp1ncl1 / glp1	Proteomics	gln-5
WBGene00001607	-0.321183	0.552234	0.725536	no	glp1ncl1 / glp1	Proteomics	gln-6
WBGene00001620	-0.0917273	0.478685	0.673248	no	glp1ncl1 / glp1	Proteomics	glt-1
WBGene00001629	-0.346659	0.00383444	0.0244316	yes	glp1ncl1 / glp1	Proteomics	gly-4
WBGene00001630	0.010177	0.923328	0.952712	no	glp1ncl1 / glp1	Proteomics	gly-5
WBGene00001632	1.68011	0.0393699	0.134404	no	glp1ncl1 / glp1	Proteomics	gly-7
WBGene00001633	-0.160604	0.0629681	0.186762	no	glp1ncl1 / glp1	Proteomics	gly-8
WBGene00001648	-0.033832	0.79729	0.887428	no	glp1ncl1 / glp1	Proteomics	goa-1
WBGene00001649	0.215105	0.616415	0.77356	no	glp1ncl1 / glp1	Proteomics	gob-1
WBGene00001661	0.695472	0.038201	0.131443	no	glp1ncl1 / glp1	Proteomics	gop-2
WBGene00001662	-0.285973	0.00425363	0.0261735	yes	glp1ncl1 / glp1	Proteomics	gop-3,hap-1
WBGene00001679	-0.28829	0.0224456	0.0881648	no	glp1ncl1 / glp1	Proteomics	gpb-1
WBGene00001682	-0.0513857	0.40793	0.612933	no	glp1ncl1 / glp1	Proteomics	gpc-2
WBGene00001683	-0.458712	0.0448048	0.146407	no	glp1ncl1 / glp1	Proteomics	gpd-1
WBGene00001685	0.0126021	0.876504	0.925637	no	glp1ncl1 / glp1	Proteomics	gpd-3
WBGene00001692	-0.52924	0.00368357	0.0236679	yes	glp1ncl1 / glp1	Proteomics	grd-3
WBGene00001694	-0.185726	0.021502	0.0855752	no	glp1ncl1 / glp1	Proteomics	grd-5
WBGene00001699	-0.136469	0.291776	0.50254	no	glp1ncl1 / glp1	Proteomics	grd-10
WBGene00001702	-0.0715464	0.437047	0.636994	no	glp1ncl1 / glp1	Proteomics	grd-13
WBGene00001703	-0.142901	0.143195	0.323441	no	glp1ncl1 / glp1	Proteomics	grd-14
WBGene00001725	-0.25961	0.720856	0.846499	no	glp1ncl1 / glp1	Proteomics	grl-16
WBGene00001744	0.0928284	0.168236	0.357561	no	glp1ncl1 / glp1	Proteomics	gars-1
WBGene00001746	-0.0986187	0.294917	0.506096	no	glp1ncl1 / glp1	Proteomics	gsk-3
WBGene00001747	-0.119467	0.406824	0.612566	no	glp1ncl1 / glp1	Proteomics	gsp-1
WBGene00001748	0.0876775	0.399948	0.606465	no	glp1ncl1 / glp1	Proteomics	gsp-2
WBGene00001749	-0.151622	0.0714156	0.203892	no	glp1ncl1 / glp1	Proteomics	gst-1
WBGene00001752	-0.327047	0.040546	0.137474	no	glp1ncl1 / glp1	Proteomics	gst-4
WBGene00001753	0.188064	0.299861	0.509847	no	glp1ncl1 / glp1	Proteomics	gst-5
WBGene00001754	-0.104215	0.80232	0.890753	no	glp1ncl1 / glp1	Proteomics	gst-6
WBGene00001755	0.107251	0.303744	0.513303	no	glp1ncl1 / glp1	Proteomics	gst-7
WBGene00001758	-0.382377	0.00478579	0.0286959	yes	glp1ncl1 / glp1	Proteomics	gst-10
WBGene00001761	-0.319681	0.0211523	0.084886	no	glp1ncl1 / glp1	Proteomics	gst-13
WBGene00001768	0.0443231	0.834946	0.905885	no	glp1ncl1 / glp1	Proteomics	gst-20
WBGene00001774	-0.309389	0.0304351	0.110318	no	glp1ncl1 / glp1	Proteomics	gst-26
WBGene00001775	-0.471796	6.47916e-06	0.000162085	yes	glp1ncl1 / glp1	Proteomics	gst-27
WBGene00001776	0.00757409	0.950652	0.969069	no	glp1ncl1 / glp1	Proteomics	gst-28
WBGene00001784	-0.373474	0.00396548	0.0250055	yes	glp1ncl1 / glp1	Proteomics	gst-36
WBGene00001787	0.232025	0.134564	0.308534	no	glp1ncl1 / glp1	Proteomics	gst-39
WBGene00001790	-0.371214	0.0124184	0.0569085	no	glp1ncl1 / glp1	Proteomics	gst-42
WBGene00001793	-0.16378	0.174051	0.364165	no	glp1ncl1 / glp1	Proteomics	gsy-1
WBGene00001794	-0.016766	0.802302	0.890753	no	glp1ncl1 / glp1	Proteomics	gta-1
WBGene00001808	0.0858604	0.856829	0.917237	no	glp1ncl1 / glp1	Proteomics	gut-2
WBGene00001814	-0.370459	0.0108507	0.0519054	no	glp1ncl1 / glp1	Proteomics	haf-4
WBGene00001815	0.106393	0.519931	0.705257	no	glp1ncl1 / glp1	Proteomics	hmt-1
WBGene00001819	-0.228685	0.030433	0.110318	no	glp1ncl1 / glp1	Proteomics	haf-9
WBGene00001823	2.12045	0.011676	0.054908	no	glp1ncl1 / glp1	Proteomics	gop-3,hap-1
WBGene00001827	0.617067	0.16464	0.352372	no	glp1ncl1 / glp1	Proteomics	hcf-1
WBGene00001829	0.482158	0.297904	0.507935	no	glp1ncl1 / glp1	Proteomics	hcp-1
WBGene00001830	0.693681	0.0122032	0.056175	no	glp1ncl1 / glp1	Proteomics	hcp-2
WBGene00001834	-0.106473	0.443141	0.642808	no	glp1ncl1 / glp1	Proteomics	hda-1
WBGene00001840	0.0613919	0.40906	0.613525	no	glp1ncl1 / glp1	Proteomics	hel-1
WBGene00001843	-0.135373	0.265894	0.478484	no	glp1ncl1 / glp1	Proteomics	hgo-1
WBGene00001853	-0.230404	0.657952	0.808076	no	glp1ncl1 / glp1	Proteomics	hil-2
WBGene00001855	0.209847	0.531515	0.712887	no	glp1ncl1 / glp1	Proteomics	hil-4
WBGene00001856	-0.616907	0.0153787	0.0662936	no	glp1ncl1 / glp1	Proteomics	hil-5
WBGene00001860	-0.415944	0.310516	0.519855	no	glp1ncl1 / glp1	Proteomics	F28B3.6,him-1
WBGene00001863	-0.0674028	0.217297	0.42161	no	glp1ncl1 / glp1	Proteomics	him-4
WBGene00001898	-0.471755	0.00643427	0.0356395	yes	glp1ncl1 / glp1	Proteomics	his-24
WBGene00001914	-0.503975	0.00130776	0.0105869	yes	glp1ncl1 / glp1	Proteomics	his-40
WBGene00001935	-2.74715	0.0303717	0.110318	no	glp1ncl1 / glp1	Proteomics	his-61
WBGene00001936	-0.257346	0.0271962	0.101969	no	glp1ncl1 / glp1	Proteomics	his-62
WBGene00001938	-0.403971	0.00032223	0.00360041	yes	glp1ncl1 / glp1	Proteomics	his-64
WBGene00001945	1.27998	0.136464	0.311409	no	glp1ncl1 / glp1	Proteomics	his-71
WBGene00001971	0.0185908	0.850118	0.913899	no	glp1ncl1 / glp1	Proteomics	hmg-1.1
WBGene00001972	0.261068	0.692102	0.829844	no	glp1ncl1 / glp1	Proteomics	hmg-1.2
WBGene00001973	-0.602092	0.0251285	0.0965896	no	glp1ncl1 / glp1	Proteomics	hmg-3
WBGene00001974	0.911191	0.0122785	0.0564366	no	glp1ncl1 / glp1	Proteomics	hmg-4
WBGene00001975	0.129912	0.763852	0.868856	no	glp1ncl1 / glp1	Proteomics	hmg-5,nrde-4
WBGene00001976	-0.12869	0.420432	0.622288	no	glp1ncl1 / glp1	Proteomics	hmg-11
WBGene00001977	0.464323	2.41323e-06	6.81962e-05	yes	glp1ncl1 / glp1	Proteomics	hmg-12
WBGene00001978	0.00146083	0.997229	0.99821	no	glp1ncl1 / glp1	Proteomics	hmp-1
WBGene00001983	0.690121	2.05313e-05	0.000406894	yes	glp1ncl1 / glp1	Proteomics	hoe-1
WBGene00001993	-0.144905	0.0386774	0.132633	no	glp1ncl1 / glp1	Proteomics	hpd-1
WBGene00001996	-0.194842	0.690842	0.829405	no	glp1ncl1 / glp1	Proteomics	hpl-2
WBGene00001999	0.0692922	0.253174	0.463519	no	glp1ncl1 / glp1	Proteomics	hrp-1
WBGene00002000	-0.080124	0.292298	0.502871	no	glp1ncl1 / glp1	Proteomics	hrp-2
WBGene00002001	0.2422	0.00494164	0.0293422	yes	glp1ncl1 / glp1	Proteomics	hars-1
WBGene00002002	0.109246	0.80549	0.89265	no	glp1ncl1 / glp1	Proteomics	eak-7,hsb-1
WBGene00002005	0.100475	0.0785725	0.217607	no	glp1ncl1 / glp1	Proteomics	hsp-1
WBGene00002007	0.0323799	0.654349	0.804623	no	glp1ncl1 / glp1	Proteomics	hsp-3
WBGene00002008	-0.313136	0.00674726	0.0366417	yes	glp1ncl1 / glp1	Proteomics	hsp-4
WBGene00002010	0.135221	0.0445731	0.145963	no	glp1ncl1 / glp1	Proteomics	hsp-6
WBGene00002011	-0.0802713	0.369438	0.576739	no	glp1ncl1 / glp1	Proteomics	hsp-12.2
WBGene00002015	1.56697	6.41127e-10	5.01723e-08	yes	glp1ncl1 / glp1	Proteomics	hsp-16.1
WBGene00002016	2.15095	7.71922e-05	0.00117795	yes	glp1ncl1 / glp1	Proteomics	hsp-16.2
WBGene00002020	1.73132	2.11647e-09	1.53797e-07	yes	glp1ncl1 / glp1	Proteomics	hsp-16.49
WBGene00002021	0.153136	0.148347	0.331445	no	glp1ncl1 / glp1	Proteomics	hsp-17
WBGene00002023	-0.0791407	0.163944	0.351599	no	glp1ncl1 / glp1	Proteomics	hsp-25
WBGene00002024	0.207611	0.0478027	0.153671	no	glp1ncl1 / glp1	Proteomics	hsp-43
WBGene00002025	0.219721	0.000483589	0.00490337	yes	glp1ncl1 / glp1	Proteomics	hsp-60
WBGene00002027	0.0278244	0.878717	0.927011	no	glp1ncl1 / glp1	Proteomics	hsr-9
WBGene00002035	-0.830274	0.186703	0.383457	no	glp1ncl1 / glp1	Proteomics	hum-1
WBGene00002038	0.847259	0.104761	0.262289	no	glp1ncl1 / glp1	Proteomics	hum-5
WBGene00002041	-0.532927	0.208534	0.410081	no	glp1ncl1 / glp1	Proteomics	hum-8
WBGene00002045	0.29662	0.000546619	0.0054165	yes	glp1ncl1 / glp1	Proteomics	C56C10.7,icd-1
WBGene00002050	0.00259844	0.95827	0.973006	no	glp1ncl1 / glp1	Proteomics	ifa-1
WBGene00002052	-0.0572414	0.414796	0.61905	no	glp1ncl1 / glp1	Proteomics	ifa-4
WBGene00002053	-0.0129195	0.777867	0.876357	no	glp1ncl1 / glp1	Proteomics	ifb-1
WBGene00002054	-0.0523466	0.532558	0.71382	no	glp1ncl1 / glp1	Proteomics	ifb-2
WBGene00002055	0.39453	0.720048	0.846202	no	glp1ncl1 / glp1	Proteomics	ifc-1
WBGene00002056	-0.222896	0.0157498	0.0676188	no	glp1ncl1 / glp1	Proteomics	ifc-2
WBGene00002057	-0.154744	0.0944686	0.245796	no	glp1ncl1 / glp1	Proteomics	ifd-1
WBGene00002058	0.0794249	0.269028	0.481636	no	glp1ncl1 / glp1	Proteomics	ifd-2
WBGene00002059	0.150526	0.0797962	0.220049	no	glp1ncl1 / glp1	Proteomics	ife-1
WBGene00002060	0.188545	0.00660859	0.0362108	yes	glp1ncl1 / glp1	Proteomics	ife-2
WBGene00002061	-0.654266	0.143598	0.323441	no	glp1ncl1 / glp1	Proteomics	ife-3
WBGene00002062	-0.424532	0.174088	0.364165	no	glp1ncl1 / glp1	Proteomics	ife-4
WBGene00002064	0.110927	0.431467	0.63227	no	glp1ncl1 / glp1	Proteomics	iff-1
WBGene00002065	0.162791	0.0530489	0.165886	no	glp1ncl1 / glp1	Proteomics	iff-2
WBGene00002066	0.206698	0.00846148	0.0434248	yes	glp1ncl1 / glp1	Proteomics	ifg-1
WBGene00002067	-0.17564	0.089408	0.235642	no	glp1ncl1 / glp1	Proteomics	ifp-1
WBGene00002070	-0.0264141	0.796231	0.886573	no	glp1ncl1 / glp1	Proteomics	K07A1.15,ile-1
WBGene00002071	-0.232341	0.0867423	0.231602	no	glp1ncl1 / glp1	Proteomics	ile-2
WBGene00002073	-0.964275	0.0107402	0.051503	no	glp1ncl1 / glp1	Proteomics	ima-2
WBGene00002074	0.372086	0.000246274	0.00291329	yes	glp1ncl1 / glp1	Proteomics	ima-3
WBGene00002075	2.19157	0.00166666	0.0125907	yes	glp1ncl1 / glp1	Proteomics	imb-1
WBGene00002077	0.427339	2.02431e-05	0.000403803	yes	glp1ncl1 / glp1	Proteomics	C53D5.5,imb-3
WBGene00002078	-0.43341	0.254375	0.464742	no	glp1ncl1 / glp1	Proteomics	xpo-1
WBGene00002079	-0.0633537	0.725711	0.850149	no	glp1ncl1 / glp1	Proteomics	xpo-2
WBGene00002083	0.246617	0.000495601	0.00499199	yes	glp1ncl1 / glp1	Proteomics	inf-1
WBGene00002134	0.752067	0.0481786	0.154131	no	glp1ncl1 / glp1	Proteomics	inx-12
WBGene00002135	0.213364	0.0758703	0.212437	no	glp1ncl1 / glp1	Proteomics	inx-13
WBGene00002138	-0.28393	0.406839	0.612566	no	glp1ncl1 / glp1	Proteomics	inx-16
WBGene00002152	0.138081	0.018137	0.0755172	no	glp1ncl1 / glp1	Proteomics	iars-1
WBGene00002162	-0.1043	0.112595	0.274945	no	glp1ncl1 / glp1	Proteomics	isp-1
WBGene00002169	-0.683925	0.32653	0.533211	no	glp1ncl1 / glp1	Proteomics	isw-1
WBGene00002174	-0.494157	0.5074	0.695993	no	glp1ncl1 / glp1	Proteomics	itx-1
WBGene00002183	-0.13295	0.16216	0.349762	no	glp1ncl1 / glp1	Proteomics	kat-1
WBGene00002187	0.0307279	0.726422	0.850419	no	glp1ncl1 / glp1	Proteomics	kgb-1
WBGene00002189	0.114761	0.819884	0.898499	no	glp1ncl1 / glp1	Proteomics	kin-1
WBGene00002190	-0.0332532	0.568611	0.7369	no	glp1ncl1 / glp1	Proteomics	kin-2
WBGene00002191	-0.0383726	0.561733	0.731291	no	glp1ncl1 / glp1	Proteomics	kin-3
WBGene00002196	-0.103408	0.528926	0.711159	no	glp1ncl1 / glp1	Proteomics	kin-10
WBGene00002202	-0.0818183	0.23499	0.43993	no	glp1ncl1 / glp1	Proteomics	kin-19
WBGene00002215	-0.0186851	0.748909	0.863021	no	glp1ncl1 / glp1	Proteomics	klc-2
WBGene00002219	-0.220089	0.174727	0.365101	no	glp1ncl1 / glp1	Proteomics	klp-7
WBGene00002223	-0.120299	0.172364	0.363048	no	glp1ncl1 / glp1	Proteomics	klp-12
WBGene00002228	-0.0468475	0.881208	0.928651	no	glp1ncl1 / glp1	Proteomics	klp-18
WBGene00002238	0.363756	1.15266e-05	0.000262532	yes	glp1ncl1 / glp1	Proteomics	kars-1
WBGene00002244	0.0305977	0.638331	0.792126	no	glp1ncl1 / glp1	Proteomics	laf-1
WBGene00002247	0.182094	0.00637205	0.0353591	yes	glp1ncl1 / glp1	Proteomics	lam-1
WBGene00002249	-0.238834	0.0033653	0.0221356	yes	glp1ncl1 / glp1	Proteomics	lap-1
WBGene00002250	-0.179727	0.00356577	0.0231056	yes	glp1ncl1 / glp1	Proteomics	lap-2
WBGene00002253	-0.210872	0.190825	0.389564	no	glp1ncl1 / glp1	Proteomics	lbp-1
WBGene00002254	-0.201708	0.0859504	0.23112	no	glp1ncl1 / glp1	Proteomics	lbp-2
WBGene00002255	-0.0324801	0.500362	0.691311	no	glp1ncl1 / glp1	Proteomics	lbp-3
WBGene00002256	0.0582795	0.534993	0.715825	no	glp1ncl1 / glp1	Proteomics	lbp-4
WBGene00002257	0.000620189	0.993694	0.995978	no	glp1ncl1 / glp1	Proteomics	lbp-5
WBGene00002258	-0.216219	0.000948468	0.0084149	yes	glp1ncl1 / glp1	Proteomics	lbp-6
WBGene00002259	-0.0788731	0.424777	0.626413	no	glp1ncl1 / glp1	Proteomics	lbp-7
WBGene00002262	-0.0332201	0.683406	0.823758	no	glp1ncl1 / glp1	Proteomics	ldh-1
WBGene00002263	0.0333735	0.617672	0.774501	no	glp1ncl1 / glp1	Proteomics	lea-1
WBGene00002264	-0.127393	0.0494773	0.157182	no	glp1ncl1 / glp1	Proteomics	lec-1
WBGene00002265	-0.206373	0.0034103	0.0223353	yes	glp1ncl1 / glp1	Proteomics	lec-2
WBGene00002266	-0.106468	0.106374	0.264979	no	glp1ncl1 / glp1	Proteomics	lec-3
WBGene00002267	0.109673	0.275108	0.484774	no	glp1ncl1 / glp1	Proteomics	lec-4
WBGene00002268	0.075517	0.42769	0.628881	no	glp1ncl1 / glp1	Proteomics	lec-5
WBGene00002269	-0.211992	0.049229	0.156834	no	glp1ncl1 / glp1	Proteomics	lec-6
WBGene00002271	0.319654	0.0495652	0.157248	no	glp1ncl1 / glp1	Proteomics	lec-8
WBGene00002272	-0.301946	0.0503199	0.158982	no	glp1ncl1 / glp1	Proteomics	lec-9
WBGene00002273	-0.191068	0.251883	0.462265	no	glp1ncl1 / glp1	Proteomics	lec-10
WBGene00002274	0.304947	0.560806	0.731073	no	glp1ncl1 / glp1	Proteomics	lec-11
WBGene00002275	-0.328378	0.0547689	0.169356	no	glp1ncl1 / glp1	Proteomics	lem-2
WBGene00002280	-0.185707	0.156169	0.342651	no	glp1ncl1 / glp1	Proteomics	let-2
WBGene00002335	-0.283323	0.00103977	0.00896437	yes	glp1ncl1 / glp1	Proteomics	let-60
WBGene00002348	-0.034348	0.575195	0.742842	no	glp1ncl1 / glp1	Proteomics	myo-1
WBGene00002363	-0.157815	0.105825	0.264519	no	glp1ncl1 / glp1	Proteomics	let-92
WBGene00002497	0.503581	0.362775	0.569752	no	glp1ncl1 / glp1	Proteomics	let-268
WBGene00002632	-0.669119	0.312266	0.521354	no	glp1ncl1 / glp1	Proteomics	let-413
WBGene00002637	-0.125786	0.290088	0.501397	no	glp1ncl1 / glp1	Proteomics	let-418
WBGene00002694	0.212804	0.489462	0.681185	no	glp1ncl1 / glp1	Proteomics	let-502
WBGene00002804	0.0720169	0.628027	0.782343	no	glp1ncl1 / glp1	Proteomics	let-630
WBGene00002845	0.182542	0.340802	0.547435	no	glp1ncl1 / glp1	Proteomics	let-711
WBGene00002850	0.920734	2.81844e-06	7.74944e-05	yes	glp1ncl1 / glp1	Proteomics	let-716
WBGene00002855	-0.0654886	0.397396	0.604311	no	glp1ncl1 / glp1	Proteomics	let-721
WBGene00002879	-0.0306675	0.599251	0.76173	no	glp1ncl1 / glp1	Proteomics	let-754
WBGene00002891	-0.287618	0.00670423	0.036538	yes	glp1ncl1 / glp1	Proteomics	C56G2.7,let-767
WBGene00002915	0.0166362	0.796069	0.886573	no	glp1ncl1 / glp1	Proteomics	let-805
WBGene00002978	-0.0718044	0.173743	0.364165	no	glp1ncl1 / glp1	Proteomics	lev-11
WBGene00002981	-0.842733	0.1008	0.255622	no	glp1ncl1 / glp1	Proteomics	lgg-2
WBGene00002985	1.446	0.187697	0.385237	no	glp1ncl1 / glp1	Proteomics	lig-1
WBGene00002994	0.0400979	0.946032	0.967109	no	glp1ncl1 / glp1	Proteomics	lin-5
WBGene00002999	-0.895045	0.0094735	0.0470132	yes	glp1ncl1 / glp1	Proteomics	lin-10
WBGene00003019	-0.0550656	0.414	0.618467	no	glp1ncl1 / glp1	Proteomics	lin-33
WBGene00003025	0.0668719	0.451632	0.64804	no	glp1ncl1 / glp1	Proteomics	lin-40
WBGene00003026	0.609474	0.303724	0.513303	no	glp1ncl1 / glp1	Proteomics	lin-41
WBGene00003036	0.0483093	0.687886	0.827632	no	glp1ncl1 / glp1	Proteomics	lin-53
WBGene00003052	0.0376946	0.518284	0.703336	no	glp1ncl1 / glp1	Proteomics	lmn-1
WBGene00003053	-0.206659	0.0314123	0.112789	no	glp1ncl1 / glp1	Proteomics	lmp-1
WBGene00003059	1.38185	4.19957e-05	0.000700388	yes	glp1ncl1 / glp1	Proteomics	lpd-2
WBGene00003061	0.0173223	0.772635	0.872717	no	glp1ncl1 / glp1	Proteomics	lpd-5
WBGene00003062	1.07179	6.80393e-08	3.00951e-06	yes	glp1ncl1 / glp1	Proteomics	lpd-6
WBGene00003063	1.20086	6.06935e-14	4.63091e-11	yes	glp1ncl1 / glp1	Proteomics	lpd-7
WBGene00003064	-0.0919205	0.28586	0.497343	no	glp1ncl1 / glp1	Proteomics	lpd-8
WBGene00003065	0.117411	0.184528	0.380527	no	glp1ncl1 / glp1	Proteomics	lpd-9
WBGene00003071	0.0391995	0.725569	0.850149	no	glp1ncl1 / glp1	Proteomics	lrp-1
WBGene00003073	1.38183	9.75125e-16	2.97608e-12	yes	glp1ncl1 / glp1	Proteomics	lars-1
WBGene00003077	0.27012	0.194729	0.393324	no	glp1ncl1 / glp1	Proteomics	lsm-3
WBGene00003078	-0.163524	0.201115	0.401399	no	glp1ncl1 / glp1	Proteomics	lsm-4
WBGene00003079	-0.481446	0.532865	0.713917	no	glp1ncl1 / glp1	Proteomics	lsm-5
WBGene00003080	-0.885699	0.0672102	0.194651	no	glp1ncl1 / glp1	Proteomics	lsm-6
WBGene00003081	-0.435991	0.00300772	0.0200694	yes	glp1ncl1 / glp1	Proteomics	lsm-7
WBGene00003082	0.0827125	0.474794	0.669317	no	glp1ncl1 / glp1	Proteomics	lsm-8
WBGene00003085	-0.050291	0.451058	0.647825	no	glp1ncl1 / glp1	Proteomics	lst-3
WBGene00003090	-0.368032	0.0177285	0.0741196	no	glp1ncl1 / glp1	Proteomics	lys-1
WBGene00003091	-0.841016	0.000103911	0.0014716	yes	glp1ncl1 / glp1	Proteomics	lys-2
WBGene00003093	0.0549905	0.383932	0.590904	no	glp1ncl1 / glp1	Proteomics	lys-4
WBGene00003096	0.138223	0.492847	0.684647	no	glp1ncl1 / glp1	Proteomics	lys-7
WBGene00003097	-0.80679	0.0582691	0.176953	no	glp1ncl1 / glp1	Proteomics	lys-8
WBGene00003119	2.36127	3.78351e-05	0.000656096	yes	glp1ncl1 / glp1	Proteomics	mac-1
WBGene00003123	0.214951	0.0160926	0.0687878	no	glp1ncl1 / glp1	Proteomics	mag-1
WBGene00003129	0.0281999	0.749346	0.863021	no	glp1ncl1 / glp1	Proteomics	map-1
WBGene00003130	0.422411	2.53745e-05	0.000484018	yes	glp1ncl1 / glp1	Proteomics	map-2
WBGene00003144	0.511905	0.250665	0.461139	no	glp1ncl1 / glp1	Proteomics	max-2
WBGene00003148	0.250383	0.00276246	0.0188614	yes	glp1ncl1 / glp1	Proteomics	mbf-1
WBGene00003151	-0.413389	0.111055	0.27246	no	glp1ncl1 / glp1	Proteomics	mca-1
WBGene00003153	-0.158313	0.100201	0.255119	no	glp1ncl1 / glp1	Proteomics	mca-3
WBGene00003154	0.0735397	0.809205	0.893522	no	glp1ncl1 / glp1	Proteomics	mcm-2
WBGene00003155	-0.598462	0.211675	0.413771	no	glp1ncl1 / glp1	Proteomics	mcm-3
WBGene00003156	-0.115589	0.754072	0.864873	no	glp1ncl1 / glp1	Proteomics	mcm-4
WBGene00003157	-0.418635	0.302868	0.512959	no	glp1ncl1 / glp1	Proteomics	mcm-5
WBGene00003158	-0.604556	0.0946649	0.245827	no	glp1ncl1 / glp1	Proteomics	mcm-6
WBGene00003159	-0.74038	0.206391	0.408	no	glp1ncl1 / glp1	Proteomics	mcm-7
WBGene00003161	-0.151642	0.682249	0.823013	no	glp1ncl1 / glp1	Proteomics	mdf-2
WBGene00003162	-0.0123773	0.826272	0.901602	no	glp1ncl1 / glp1	Proteomics	mdh-2
WBGene00003171	-0.192051	0.0200404	0.0814424	no	glp1ncl1 / glp1	Proteomics	mec-7
WBGene00003175	-0.151661	0.257739	0.467392	no	glp1ncl1 / glp1	Proteomics	mec-12
WBGene00003186	-0.0743187	0.558861	0.729844	no	glp1ncl1 / glp1	Proteomics	mek-2
WBGene00003196	-0.466624	0.387278	0.594852	no	glp1ncl1 / glp1	Proteomics	mel-11
WBGene00003214	-0.218137	0.00210781	0.0152442	yes	glp1ncl1 / glp1	Proteomics	mel-32
WBGene00003218	-0.505209	0.170581	0.359788	no	glp1ncl1 / glp1	Proteomics	mep-1
WBGene00003225	-0.0519515	0.79552	0.886429	no	glp1ncl1 / glp1	Proteomics	ced-9,mev-1
WBGene00003228	-0.551376	0.135715	0.310264	no	glp1ncl1 / glp1	Proteomics	mex-1
WBGene00003230	0.888184	0.0790223	0.218457	no	glp1ncl1 / glp1	Proteomics	mex-5
WBGene00003234	-0.240499	0.0856646	0.230554	no	glp1ncl1 / glp1	Proteomics	mif-1
WBGene00003235	-0.180769	0.163857	0.351599	no	glp1ncl1 / glp1	Proteomics	mif-2
WBGene00003242	-0.218769	0.0868128	0.231602	no	glp1ncl1 / glp1	Proteomics	mig-6
WBGene00003367	1.05591	0.276856	0.487011	no	glp1ncl1 / glp1	Proteomics	mix-1
WBGene00003369	1.9562	0.00476122	0.0286048	yes	glp1ncl1 / glp1	Proteomics	mlc-1
WBGene00003370	0.0194032	0.747429	0.862766	no	glp1ncl1 / glp1	Proteomics	mlc-2
WBGene00003371	0.108022	0.197344	0.397291	no	glp1ncl1 / glp1	Proteomics	mlc-3
WBGene00003372	-0.241382	0.00617462	0.034459	yes	glp1ncl1 / glp1	Proteomics	mlc-4
WBGene00003375	-0.0716591	0.460471	0.657425	no	glp1ncl1 / glp1	Proteomics	mlp-1
WBGene00003384	-0.194881	0.538314	0.718066	no	glp1ncl1 / glp1	Proteomics	moc-1
WBGene00003390	0.193976	0.0473986	0.153405	no	glp1ncl1 / glp1	Proteomics	mog-2
WBGene00003393	-0.600201	0.193645	0.392174	no	glp1ncl1 / glp1	Proteomics	mog-5
WBGene00003401	-0.0539394	0.860001	0.918296	no	glp1ncl1 / glp1	Proteomics	mpk-1
WBGene00003406	0.407473	0.447987	0.646152	no	glp1ncl1 / glp1	Proteomics	mrg-1
WBGene00003411	-0.0614747	0.564163	0.733576	no	glp1ncl1 / glp1	Proteomics	mrp-5
WBGene00003415	0.278064	0.00142508	0.0112413	yes	glp1ncl1 / glp1	Proteomics	mars-1
WBGene00003422	0.276622	0.427998	0.628881	no	glp1ncl1 / glp1	Proteomics	msh-6
WBGene00003423	-0.152346	0.081465	0.223589	no	glp1ncl1 / glp1	Proteomics	msi-1
WBGene00003464	-0.448151	0.540037	0.718829	no	glp1ncl1 / glp1	Proteomics	msp-77
WBGene00003465	0.872271	0.28784	0.499993	no	glp1ncl1 / glp1	Proteomics	msp-78
WBGene00003482	-0.0197274	0.787548	0.882219	no	glp1ncl1 / glp1	Proteomics	mua-3
WBGene00003485	0.0365862	0.481247	0.675384	no	glp1ncl1 / glp1	Proteomics	mua-6
WBGene00003495	-0.148231	0.0282498	0.105145	no	glp1ncl1 / glp1	Proteomics	mup-2
WBGene00003497	0.14737	0.0404881	0.137452	no	glp1ncl1 / glp1	Proteomics	mup-4
WBGene00003514	-0.0340784	0.574328	0.742245	no	glp1ncl1 / glp1	Proteomics	myo-2
WBGene00003515	0.0355546	0.634349	0.787966	no	glp1ncl1 / glp1	Proteomics	myo-3
WBGene00003530	0.137158	0.126035	0.293498	no	glp1ncl1 / glp1	Proteomics	nas-11
WBGene00003553	0.282527	0.0044922	0.0271489	yes	glp1ncl1 / glp1	Proteomics	nas-37
WBGene00003564	-0.06799	0.765621	0.869054	no	glp1ncl1 / glp1	Proteomics	ncs-2
WBGene00003566	-1.17522	0.376341	0.583042	no	glp1ncl1 / glp1	Proteomics	ncx-1
WBGene00003567	-0.179641	0.077559	0.215421	no	glp1ncl1 / glp1	Proteomics	ncx-2
WBGene00003581	-0.159194	0.20941	0.410745	no	glp1ncl1 / glp1	Proteomics	ndx-4
WBGene00003583	0.00115695	0.996388	0.998023	no	glp1ncl1 / glp1	Proteomics	ndx-6,rsp-4
WBGene00003584	-0.218693	0.549468	0.724396	no	glp1ncl1 / glp1	Proteomics	ndx-7
WBGene00003587	0.109275	0.602213	0.763587	no	glp1ncl1 / glp1	Proteomics	ned-8
WBGene00003588	-0.0201592	0.825453	0.901525	no	glp1ncl1 / glp1	Proteomics	nex-1
WBGene00003589	-0.00672186	0.957593	0.973006	no	glp1ncl1 / glp1	Proteomics	nex-2
WBGene00003590	0.0296106	0.766372	0.869181	no	glp1ncl1 / glp1	Proteomics	nex-3
WBGene00003594	-0.105	0.205176	0.406179	no	glp1ncl1 / glp1	Proteomics	nft-1
WBGene00003596	1.65591	4.82485e-08	2.33737e-06	yes	glp1ncl1 / glp1	Proteomics	ngp-1
WBGene00003598	0.048584	0.700488	0.835812	no	glp1ncl1 / glp1	Proteomics	nhl-2
WBGene00003730	0.110458	0.785565	0.88102	no	glp1ncl1 / glp1	Proteomics	nhx-2
WBGene00003738	-0.362041	8.41845e-05	0.00127194	yes	glp1ncl1 / glp1	Proteomics	nid-1
WBGene00003762	-0.187282	0.824503	0.901283	no	glp1ncl1 / glp1	Proteomics	nlp-24
WBGene00003764	0.481258	0.533993	0.715077	no	glp1ncl1 / glp1	Proteomics	nlp-26
WBGene00003769	4.18142	0.000323169	0.00360041	yes	glp1ncl1 / glp1	Proteomics	nlp-31
WBGene00003773	-0.16192	0.0299315	0.109402	no	glp1ncl1 / glp1	Proteomics	nlt-1
WBGene00003776	-0.320925	7.56324e-06	0.000183199	yes	glp1ncl1 / glp1	Proteomics	nmy-1
WBGene00003777	-0.0899137	0.35723	0.564272	no	glp1ncl1 / glp1	Proteomics	nmy-2
WBGene00003785	-0.506237	0.107391	0.266253	no	glp1ncl1 / glp1	Proteomics	nos-3
WBGene00003786	-0.203278	0.0118904	0.0553706	no	glp1ncl1 / glp1	Proteomics	npa-1
WBGene00003787	0.19339	0.702039	0.836324	no	glp1ncl1 / glp1	Proteomics	npp-1
WBGene00003790	0.500965	0.146909	0.328956	no	glp1ncl1 / glp1	Proteomics	npp-4
WBGene00003791	-0.104215	0.86714	0.921101	no	glp1ncl1 / glp1	Proteomics	npp-5
WBGene00003793	0.109895	0.228395	0.431885	no	glp1ncl1 / glp1	Proteomics	npp-7
WBGene00003794	0.211218	0.564844	0.733576	no	glp1ncl1 / glp1	Proteomics	npp-8
WBGene00003795	0.0269846	0.694991	0.831482	no	glp1ncl1 / glp1	Proteomics	npp-9
WBGene00003796	0.0592114	0.460998	0.657568	no	glp1ncl1 / glp1	Proteomics	npp-10
WBGene00003797	0.342773	0.112318	0.274676	no	glp1ncl1 / glp1	Proteomics	npp-11
WBGene00003798	-0.0236359	0.846544	0.911985	no	glp1ncl1 / glp1	Proteomics	npp-12
WBGene00003799	0.308219	0.257358	0.466978	no	glp1ncl1 / glp1	Proteomics	npp-13
WBGene00003800	0.521895	0.23904	0.444848	no	glp1ncl1 / glp1	Proteomics	npp-14
WBGene00003802	0.169874	0.129752	0.299547	no	glp1ncl1 / glp1	Proteomics	npp-16
WBGene00003803	-0.700282	0.206597	0.408112	no	glp1ncl1 / glp1	Proteomics	rae-1
WBGene00003804	-0.162632	0.680888	0.821697	no	glp1ncl1 / glp1	Proteomics	npp-18
WBGene00003805	0.139547	0.357474	0.564272	no	glp1ncl1 / glp1	Proteomics	npp-19
WBGene00003806	-0.0642859	0.435698	0.636244	no	glp1ncl1 / glp1	Proteomics	npp-20
WBGene00003812	-0.0357023	0.822503	0.899488	no	glp1ncl1 / glp1	Proteomics	nrf-5
WBGene00003815	0.4304	5.82914e-07	1.97673e-05	yes	glp1ncl1 / glp1	Proteomics	nars-1
WBGene00003818	-0.257114	0.000154797	0.00201898	yes	glp1ncl1 / glp1	Proteomics	nsf-1
WBGene00003821	1.09939	3.47447e-11	4.82003e-09	yes	glp1ncl1 / glp1	Proteomics	nst-1
WBGene00003826	-0.347353	0.00428018	0.0262249	yes	glp1ncl1 / glp1	Proteomics	ntl-3
WBGene00003827	-0.212068	0.055265	0.170107	no	glp1ncl1 / glp1	Proteomics	ntl-4
WBGene00003828	-0.30882	0.00994813	0.0487346	yes	glp1ncl1 / glp1	Proteomics	nuc-1
WBGene00003829	0.0917227	0.306738	0.516646	no	glp1ncl1 / glp1	Proteomics	nud-1
WBGene00003831	-0.042144	0.548406	0.723621	no	glp1ncl1 / glp1	Proteomics	C09H10.4,nuo-1
WBGene00003834	0.403046	0.000616601	0.00593649	yes	glp1ncl1 / glp1	Proteomics	nxf-1
WBGene00003836	0.252495	0.0423005	0.140023	no	glp1ncl1 / glp1	Proteomics	nxt-1
WBGene00003858	-0.251356	0.359622	0.565756	no	glp1ncl1 / glp1	Proteomics	ogt-1
WBGene00003860	0.640784	0.205219	0.406179	no	glp1ncl1 / glp1	Proteomics	oig-2
WBGene00003865	0.00637832	0.981227	0.988171	no	glp1ncl1 / glp1	Proteomics	oma-2
WBGene00003877	0.0808248	0.806749	0.893075	no	glp1ncl1 / glp1	Proteomics	pept-1
WBGene00003891	-0.672553	0.00178949	0.0133861	yes	glp1ncl1 / glp1	Proteomics	osm-11
WBGene00003893	0.125334	0.296179	0.506692	no	glp1ncl1 / glp1	Proteomics	ost-1
WBGene00003901	-0.106741	0.212334	0.414616	no	glp1ncl1 / glp1	Proteomics	paa-1
WBGene00003902	0.0896371	0.143497	0.323441	no	glp1ncl1 / glp1	Proteomics	pab-1
WBGene00003903	-0.158328	0.00602387	0.0339204	yes	glp1ncl1 / glp1	Proteomics	pab-2
WBGene00003904	0.127393	0.0325345	0.115853	no	glp1ncl1 / glp1	Proteomics	pabp-2
WBGene00003914	-0.100495	0.185722	0.382214	no	glp1ncl1 / glp1	Proteomics	pam-1
WBGene00003916	-0.131694	0.106617	0.264979	no	glp1ncl1 / glp1	Proteomics	par-1
WBGene00003920	-0.0858975	0.170478	0.359788	no	glp1ncl1 / glp1	Proteomics	par-5
WBGene00003922	-0.0414398	0.553401	0.726186	no	glp1ncl1 / glp1	Proteomics	pas-1
WBGene00003923	-0.0940971	0.28499	0.496454	no	glp1ncl1 / glp1	Proteomics	pas-2
WBGene00003924	-0.0968941	0.382526	0.589631	no	glp1ncl1 / glp1	Proteomics	pas-3
WBGene00003925	-0.0908861	0.191493	0.389885	no	glp1ncl1 / glp1	Proteomics	pas-4
WBGene00003926	0.0121089	0.883536	0.929846	no	glp1ncl1 / glp1	Proteomics	pas-5
WBGene00003927	-0.0147168	0.852177	0.914991	no	glp1ncl1 / glp1	Proteomics	pas-6
WBGene00003928	-0.0503854	0.580739	0.745339	no	glp1ncl1 / glp1	Proteomics	pas-7
WBGene00003929	0.0317374	0.622487	0.778127	no	glp1ncl1 / glp1	Proteomics	pat-2
WBGene00003930	0.00848507	0.902348	0.941526	no	glp1ncl1 / glp1	Proteomics	pat-3
WBGene00003931	-0.0121422	0.857843	0.917678	no	glp1ncl1 / glp1	Proteomics	pat-4
WBGene00003932	-0.0222598	0.764576	0.868856	no	glp1ncl1 / glp1	Proteomics	pat-6
WBGene00003934	0.0410958	0.714576	0.842618	no	glp1ncl1 / glp1	Proteomics	pat-10
WBGene00003936	-0.0950782	0.156083	0.342651	no	glp1ncl1 / glp1	Proteomics	pat-12
WBGene00003941	-0.0646541	0.544681	0.7212	no	glp1ncl1 / glp1	Proteomics	pbo-1
WBGene00003947	-0.00841199	0.912996	0.947133	no	glp1ncl1 / glp1	Proteomics	pbs-1
WBGene00003948	-0.0667918	0.572234	0.740652	no	glp1ncl1 / glp1	Proteomics	pbs-2
WBGene00003949	-0.149282	0.272034	0.483929	no	glp1ncl1 / glp1	Proteomics	pbs-3
WBGene00003950	-0.220893	0.0215634	0.0856347	no	glp1ncl1 / glp1	Proteomics	pbs-4
WBGene00003951	-0.118128	0.217757	0.422233	no	glp1ncl1 / glp1	Proteomics	pbs-5
WBGene00003952	-0.284711	0.0670099	0.19447	no	glp1ncl1 / glp1	Proteomics	pbs-6
WBGene00003953	-0.143833	0.193261	0.391673	no	glp1ncl1 / glp1	Proteomics	pbs-7
WBGene00003955	-0.660576	0.00173361	0.013032	yes	glp1ncl1 / glp1	Proteomics	pcn-1
WBGene00003956	-0.460244	0.237265	0.442354	no	glp1ncl1 / glp1	Proteomics	pcp-1
WBGene00003958	-0.170781	0.143305	0.323441	no	glp1ncl1 / glp1	Proteomics	pcp-3
WBGene00003962	0.191916	0.0389124	0.13315	no	glp1ncl1 / glp1	Proteomics	pdi-1
WBGene00003963	0.063419	0.409807	0.613525	no	glp1ncl1 / glp1	Proteomics	pdi-2
WBGene00003964	0.118881	0.0649174	0.190508	no	glp1ncl1 / glp1	Proteomics	pdi-3
WBGene00003978	-0.158755	0.143557	0.323441	no	glp1ncl1 / glp1	Proteomics	pes-4
WBGene00003980	0.0463783	0.655713	0.805975	no	glp1ncl1 / glp1	Proteomics	pes-7
WBGene00003981	0.0568627	0.48601	0.680102	no	glp1ncl1 / glp1	Proteomics	pes-8
WBGene00003982	-0.168661	0.0258164	0.0981216	no	glp1ncl1 / glp1	Proteomics	pes-9
WBGene00003986	-0.188268	0.0450605	0.147085	no	glp1ncl1 / glp1	Proteomics	mct-4
WBGene00003989	0.0174123	0.896567	0.937621	no	glp1ncl1 / glp1	Proteomics	pfn-1
WBGene00003990	-0.126589	0.19703	0.396921	no	glp1ncl1 / glp1	Proteomics	pfn-2
WBGene00003991	0.124503	0.317633	0.525429	no	glp1ncl1 / glp1	Proteomics	pfn-3
WBGene00003992	-0.310257	0.296929	0.507122	no	glp1ncl1 / glp1	Proteomics	pgl-1
WBGene00003994	0.268283	0.244657	0.453642	no	glp1ncl1 / glp1	Proteomics	pgl-3
WBGene00003996	-0.394436	0.0136015	0.0607784	no	glp1ncl1 / glp1	Proteomics	pgp-2
WBGene00004014	0.0918214	0.273956	0.484566	no	glp1ncl1 / glp1	Proteomics	phb-1
WBGene00004015	0.0382645	0.535736	0.716506	no	glp1ncl1 / glp1	Proteomics	phb-2
WBGene00004016	-0.41762	0.498129	0.689161	no	glp1ncl1 / glp1	Proteomics	phf-5
WBGene00004020	-0.298205	0.0226228	0.0887464	no	glp1ncl1 / glp1	Proteomics	pho-1
WBGene00004025	0.0852064	0.312438	0.521357	no	glp1ncl1 / glp1	Proteomics	phy-2
WBGene00004033	-0.407057	0.000430831	0.00445727	yes	glp1ncl1 / glp1	Proteomics	pkc-2
WBGene00004039	-0.503008	0.400005	0.606465	no	glp1ncl1 / glp1	Proteomics	plc-4
WBGene00004040	0.0740011	0.489972	0.681584	no	glp1ncl1 / glp1	Proteomics	pld-1
WBGene00004042	0.301405	0.400354	0.606694	no	glp1ncl1 / glp1	Proteomics	plk-1
WBGene00004046	0.0866222	0.187948	0.385237	no	glp1ncl1 / glp1	Proteomics	plp-1
WBGene00004053	-0.236661	0.117295	0.281877	no	glp1ncl1 / glp1	Proteomics	tank-1
WBGene00004058	-0.0426831	0.850455	0.91394	no	glp1ncl1 / glp1	Proteomics	pmp-1
WBGene00004059	-0.721246	0.0312376	0.112692	no	glp1ncl1 / glp1	Proteomics	pmp-2
WBGene00004062	-0.100984	0.409439	0.613525	no	glp1ncl1 / glp1	Proteomics	pmp-5
WBGene00004075	-0.118721	0.0719934	0.205083	no	glp1ncl1 / glp1	Proteomics	pod-1
WBGene00004076	-0.307683	9.57226e-05	0.00140455	yes	glp1ncl1 / glp1	Proteomics	pod-2
WBGene00004087	0.712381	0.0704234	0.202194	no	glp1ncl1 / glp1	Proteomics	ppk-1
WBGene00004091	-0.0601154	0.80076	0.889669	no	glp1ncl1 / glp1	Proteomics	pps-1
WBGene00004093	-0.14405	0.074705	0.210332	no	glp1ncl1 / glp1	Proteomics	ppw-1
WBGene00004094	-0.0942925	0.792613	0.884481	no	glp1ncl1 / glp1	Proteomics	ppw-2
WBGene00004101	-0.0643836	0.481762	0.675396	no	glp1ncl1 / glp1	Proteomics	hgrs-1
WBGene00004105	0.0806711	0.67963	0.820827	no	glp1ncl1 / glp1	Proteomics	szy-20
WBGene00004109	-0.102087	0.265598	0.478376	no	glp1ncl1 / glp1	Proteomics	stam-1
WBGene00004112	-0.0480723	0.415858	0.619455	no	glp1ncl1 / glp1	Proteomics	pqn-22
WBGene00004113	0.0114717	0.976085	0.985122	no	glp1ncl1 / glp1	Proteomics	pqn-24
WBGene00004116	-0.127878	0.181916	0.376667	no	glp1ncl1 / glp1	Proteomics	pqn-27
WBGene00004125	-0.123781	0.820141	0.898499	no	glp1ncl1 / glp1	Proteomics	mdt-30
WBGene00004130	0.0240912	0.665502	0.810823	no	glp1ncl1 / glp1	Proteomics	ketn-1
WBGene00004132	0.500659	0.128304	0.297331	no	glp1ncl1 / glp1	Proteomics	ifet-1
WBGene00004138	-0.134526	0.106831	0.265296	no	glp1ncl1 / glp1	Proteomics	pqn-53
WBGene00004143	0.072347	0.38076	0.588098	no	glp1ncl1 / glp1	Proteomics	R119.3,pqn-59
WBGene00004152	0.236997	0.0560773	0.171663	no	glp1ncl1 / glp1	Proteomics	pqn-70
WBGene00004156	-2.33705	0.0279872	0.104534	no	glp1ncl1 / glp1	Proteomics	pqn-74
WBGene00004164	-0.252763	0.0936239	0.244014	no	glp1ncl1 / glp1	Proteomics	pqn-83
WBGene00004167	0.0923967	0.305531	0.515183	no	glp1ncl1 / glp1	Proteomics	pqn-87
WBGene00004178	0.168272	0.589868	0.753254	no	glp1ncl1 / glp1	Proteomics	prg-1
WBGene00004184	-0.00818433	0.987304	0.991527	no	glp1ncl1 / glp1	Proteomics	T19D2.2
WBGene00004185	2.29747	2.70359e-05	0.000503131	yes	glp1ncl1 / glp1	Proteomics	pro-1
WBGene00004187	0.0745524	0.539836	0.718829	no	glp1ncl1 / glp1	Proteomics	prp-8
WBGene00004188	-0.0105908	0.941586	0.964336	no	glp1ncl1 / glp1	Proteomics	prp-21
WBGene00004189	0.157021	0.00692257	0.0370012	yes	glp1ncl1 / glp1	Proteomics	pars-1
WBGene00004190	0.357842	0.158184	0.344104	no	glp1ncl1 / glp1	Proteomics	pars-2
WBGene00004199	-0.058386	0.509201	0.697206	no	glp1ncl1 / glp1	Proteomics	nuaf-3,prx-14
WBGene00004201	0.0793457	0.316405	0.525104	no	glp1ncl1 / glp1	Proteomics	prx-19
WBGene00004203	0.019448	0.847511	0.912704	no	glp1ncl1 / glp1	Proteomics	swsn-1
WBGene00004204	0.581829	0.126268	0.293728	no	glp1ncl1 / glp1	Proteomics	swsn-4
WBGene00004208	0.98427	0.0119558	0.0553706	no	glp1ncl1 / glp1	Proteomics	ptc-1
WBGene00004214	-0.191725	0.278993	0.489747	no	glp1ncl1 / glp1	Proteomics	ptp-2
WBGene00004238	-0.114404	0.826617	0.901657	no	glp1ncl1 / glp1	Proteomics	ptr-24
WBGene00004245	0.781621	0.17515	0.365384	no	glp1ncl1 / glp1	Proteomics	puf-9
WBGene00004248	1.66724	9.20819e-06	0.00021618	yes	glp1ncl1 / glp1	Proteomics	pus-1
WBGene00004256	0.168822	0.0862648	0.231353	no	glp1ncl1 / glp1	Proteomics	pxn-1
WBGene00004258	0.00085093	0.990522	0.994105	no	glp1ncl1 / glp1	Proteomics	pyc-1
WBGene00004259	-0.0863485	0.27924	0.48979	no	glp1ncl1 / glp1	Proteomics	pyr-1
WBGene00004266	-0.189061	0.0522484	0.163719	no	glp1ncl1 / glp1	Proteomics	rab-1
WBGene00004268	-0.167101	0.343087	0.54966	no	glp1ncl1 / glp1	Proteomics	rab-5
WBGene00004270	-0.0683366	0.539796	0.718829	no	glp1ncl1 / glp1	Proteomics	rab-6.2
WBGene00004271	-0.36238	0.00167602	0.0126301	yes	glp1ncl1 / glp1	Proteomics	rab-7
WBGene00004272	-0.667399	0.144545	0.324854	no	glp1ncl1 / glp1	Proteomics	rab-8
WBGene00004273	0.0811747	0.64415	0.796575	no	glp1ncl1 / glp1	Proteomics	rab-10
WBGene00004274	-0.276852	0.0199682	0.0812573	no	glp1ncl1 / glp1	Proteomics	rab-11.1
WBGene00004277	-0.143239	0.201061	0.401399	no	glp1ncl1 / glp1	Proteomics	rab-18
WBGene00004284	-0.19986	0.46121	0.657568	no	glp1ncl1 / glp1	Proteomics	rab-35
WBGene00004302	0.056969	0.470142	0.666143	no	glp1ncl1 / glp1	Proteomics	ran-1
WBGene00004303	-0.285327	0.00968342	0.0477444	yes	glp1ncl1 / glp1	Proteomics	ran-2
WBGene00004304	0.0400463	0.588419	0.752664	no	glp1ncl1 / glp1	Proteomics	ran-3
WBGene00004305	-0.170442	0.0214799	0.0855752	no	glp1ncl1 / glp1	Proteomics	ran-4
WBGene00004306	0.0168671	0.883323	0.929846	no	glp1ncl1 / glp1	Proteomics	ran-5
WBGene00004315	2.48311	3.35962e-12	6.83571e-10	yes	glp1ncl1 / glp1	Proteomics	rbd-1
WBGene00004336	-0.026075	0.737416	0.856717	no	glp1ncl1 / glp1	Proteomics	ret-1
WBGene00004338	-0.73936	0.0878068	0.232813	no	glp1ncl1 / glp1	Proteomics	rfc-2
WBGene00004356	0.12557	0.139892	0.31767	no	glp1ncl1 / glp1	Proteomics	rhi-1
WBGene00004357	-0.0930562	0.438938	0.639141	no	glp1ncl1 / glp1	Proteomics	rho-1
WBGene00004364	-0.171821	0.514533	0.701766	no	glp1ncl1 / glp1	Proteomics	ric-4
WBGene00004370	-0.441932	0.255311	0.464742	no	glp1ncl1 / glp1	Proteomics	rig-3
WBGene00004373	-0.0638584	0.222551	0.426725	no	glp1ncl1 / glp1	Proteomics	rme-1
WBGene00004374	0.0443223	0.892093	0.935303	no	glp1ncl1 / glp1	Proteomics	rme-2
WBGene00004378	0.368128	0.458683	0.655385	no	glp1ncl1 / glp1	Proteomics	rme-8
WBGene00004382	0.114323	0.390584	0.597369	no	glp1ncl1 / glp1	Proteomics	rnh-1.0,vps-24
WBGene00004384	0.370438	0.534199	0.715077	no	glp1ncl1 / glp1	Proteomics	rnp-1
WBGene00004385	-0.0423319	0.783296	0.879363	no	glp1ncl1 / glp1	Proteomics	rnp-2
WBGene00004386	0.0527096	0.607691	0.768617	no	glp1ncl1 / glp1	Proteomics	rnp-3
WBGene00004387	0.154613	0.103151	0.259965	no	glp1ncl1 / glp1	Proteomics	rnp-4
WBGene00004388	0.203091	0.054634	0.169111	no	glp1ncl1 / glp1	Proteomics	rnp-5
WBGene00004389	-0.0559672	0.815204	0.895609	no	glp1ncl1 / glp1	Proteomics	rnp-6
WBGene00004390	-0.0684934	0.838373	0.908137	no	glp1ncl1 / glp1	Proteomics	K04G7.11,rnp-7
WBGene00004391	-1.10857	0.150883	0.334175	no	glp1ncl1 / glp1	Proteomics	rnr-1
WBGene00004392	-0.523552	0.448972	0.646961	no	glp1ncl1 / glp1	Proteomics	rnr-2
WBGene00004405	-0.0176848	0.77175	0.872363	no	glp1ncl1 / glp1	Proteomics	rop-1
WBGene00004408	0.0728635	0.213716	0.416051	no	glp1ncl1 / glp1	Proteomics	rla-0
WBGene00004409	0.0804137	0.246126	0.45581	no	glp1ncl1 / glp1	Proteomics	rla-1
WBGene00004410	0.0654464	0.567537	0.736193	no	glp1ncl1 / glp1	Proteomics	rla-2
WBGene00004411	1.5532	0.00409227	0.0255935	yes	glp1ncl1 / glp1	Proteomics	rpc-1
WBGene00004412	0.120039	0.100896	0.255622	no	glp1ncl1 / glp1	Proteomics	rpl-1
WBGene00004413	0.0588277	0.450621	0.647807	no	glp1ncl1 / glp1	Proteomics	rpl-2
WBGene00004414	0.117244	0.156754	0.342949	no	glp1ncl1 / glp1	Proteomics	rpl-3
WBGene00004415	0.0658926	0.385742	0.59309	no	glp1ncl1 / glp1	Proteomics	rpl-4
WBGene00004416	0.0543806	0.39357	0.600888	no	glp1ncl1 / glp1	Proteomics	rpl-5
WBGene00004417	-0.0467619	0.617328	0.774388	no	glp1ncl1 / glp1	Proteomics	rpl-6
WBGene00004418	0.059674	0.273983	0.484566	no	glp1ncl1 / glp1	Proteomics	F53G12.9,rpl-7
WBGene00004419	0.0716889	0.279398	0.48979	no	glp1ncl1 / glp1	Proteomics	rpl-7A
WBGene00004420	0.0227256	0.781021	0.877968	no	glp1ncl1 / glp1	Proteomics	rpl-9
WBGene00004421	0.00143011	0.986859	0.991407	no	glp1ncl1 / glp1	Proteomics	rpl-10
WBGene00004422	-2.60971	9.73276e-05	0.00142126	yes	glp1ncl1 / glp1	Proteomics	rpl-11.1
WBGene00004423	-0.0947997	0.409662	0.613525	no	glp1ncl1 / glp1	Proteomics	rpl-11.2
WBGene00004424	0.0155296	0.812798	0.894308	no	glp1ncl1 / glp1	Proteomics	rpl-12
WBGene00004425	0.0660201	0.272284	0.483929	no	glp1ncl1 / glp1	Proteomics	rpl-13
WBGene00004426	-0.0281984	0.705846	0.837756	no	glp1ncl1 / glp1	Proteomics	rpl-14
WBGene00004427	0.104573	0.17002	0.359598	no	glp1ncl1 / glp1	Proteomics	rpl-15
WBGene00004428	-0.0632997	0.574438	0.742245	no	glp1ncl1 / glp1	Proteomics	M01F1.3,rpl-16
WBGene00004429	-0.0155011	0.820793	0.898838	no	glp1ncl1 / glp1	Proteomics	rpl-17
WBGene00004430	0.0708403	0.357812	0.564363	no	glp1ncl1 / glp1	Proteomics	gly-10,rpl-18
WBGene00004431	0.127864	0.0847479	0.228288	no	glp1ncl1 / glp1	Proteomics	rpl-19
WBGene00004432	-0.153591	0.194289	0.392956	no	glp1ncl1 / glp1	Proteomics	cyc-2.1,rpl-20
WBGene00004433	0.0178643	0.810019	0.893672	no	glp1ncl1 / glp1	Proteomics	rpl-21
WBGene00004434	-0.0488354	0.573968	0.742245	no	glp1ncl1 / glp1	Proteomics	rpl-22
WBGene00004435	-0.00935845	0.909378	0.944846	no	glp1ncl1 / glp1	Proteomics	rpl-23
WBGene00004436	0.179009	0.0177582	0.0741422	no	glp1ncl1 / glp1	Proteomics	rpl-24.1
WBGene00004437	1.12488	9.78964e-07	3.17851e-05	yes	glp1ncl1 / glp1	Proteomics	rpl-24.2
WBGene00004438	-0.0109088	0.868846	0.921392	no	glp1ncl1 / glp1	Proteomics	rpl-25.1
WBGene00004439	0.172014	0.0716604	0.2044	no	glp1ncl1 / glp1	Proteomics	rpl-25.2
WBGene00004440	0.0499552	0.522389	0.707335	no	glp1ncl1 / glp1	Proteomics	rpl-26
WBGene00004441	0.112101	0.098908	0.253457	no	glp1ncl1 / glp1	Proteomics	rpl-27
WBGene00004442	0.0564623	0.623461	0.778127	no	glp1ncl1 / glp1	Proteomics	rpl-28
WBGene00004443	0.0428578	0.815144	0.895609	no	glp1ncl1 / glp1	Proteomics	rpl-29
WBGene00004444	0.0859975	0.192739	0.391637	no	glp1ncl1 / glp1	Proteomics	rpl-30
WBGene00004445	-0.0801687	0.572979	0.741302	no	glp1ncl1 / glp1	Proteomics	rpl-31
WBGene00004446	0.0132804	0.827979	0.902211	no	glp1ncl1 / glp1	Proteomics	rpl-32
WBGene00004447	-0.0792672	0.450331	0.647807	no	glp1ncl1 / glp1	Proteomics	rpl-33
WBGene00004448	0.0137896	0.833903	0.905398	no	glp1ncl1 / glp1	Proteomics	rpl-34
WBGene00004449	-0.0283844	0.790398	0.883301	no	glp1ncl1 / glp1	Proteomics	rpl-35
WBGene00004450	0.114983	0.147219	0.329408	no	glp1ncl1 / glp1	Proteomics	rpl-36
WBGene00004452	0.0291201	0.643424	0.796	no	glp1ncl1 / glp1	Proteomics	rpl-38
WBGene00004453	0.0985184	0.352337	0.560361	no	glp1ncl1 / glp1	Proteomics	rpl-39
WBGene00004454	0.0635628	0.365146	0.572381	no	glp1ncl1 / glp1	Proteomics	rpl-41
WBGene00004456	0.108781	0.224016	0.427951	no	glp1ncl1 / glp1	Proteomics	rpl-43
WBGene00004458	-0.0137173	0.833053	0.905301	no	glp1ncl1 / glp1	Proteomics	rpn-1
WBGene00004459	-0.0324318	0.598288	0.760823	no	glp1ncl1 / glp1	Proteomics	rpn-2
WBGene00004460	-0.0225342	0.740706	0.857926	no	glp1ncl1 / glp1	Proteomics	rpn-3
WBGene00004461	0.147125	0.104186	0.261212	no	glp1ncl1 / glp1	Proteomics	rpn-5
WBGene00004462	-0.123199	0.0899177	0.236576	no	glp1ncl1 / glp1	Proteomics	rpn-6.1
WBGene00004463	0.0797589	0.270072	0.482575	no	glp1ncl1 / glp1	Proteomics	rpn-7
WBGene00004464	-0.111076	0.331551	0.539102	no	glp1ncl1 / glp1	Proteomics	rpn-8
WBGene00004465	-0.0399189	0.658519	0.80827	no	glp1ncl1 / glp1	Proteomics	rpn-9
WBGene00004466	-0.0240721	0.770837	0.872363	no	glp1ncl1 / glp1	Proteomics	rpn-10
WBGene00004467	-0.0444626	0.595214	0.757861	no	glp1ncl1 / glp1	Proteomics	rpn-11
WBGene00004468	-0.662532	0.263273	0.475731	no	glp1ncl1 / glp1	Proteomics	rpn-12
WBGene00004469	-0.00532229	0.94767	0.967765	no	glp1ncl1 / glp1	Proteomics	rps-0
WBGene00004470	-0.0779981	0.332923	0.539571	no	glp1ncl1 / glp1	Proteomics	rps-1
WBGene00004471	-0.00672787	0.929701	0.956014	no	glp1ncl1 / glp1	Proteomics	rps-2
WBGene00004472	0.00185557	0.977645	0.986371	no	glp1ncl1 / glp1	Proteomics	C23G10.2,rps-3
WBGene00004473	-0.0574229	0.503428	0.693818	no	glp1ncl1 / glp1	Proteomics	rps-4
WBGene00004474	0.077033	0.207053	0.408221	no	glp1ncl1 / glp1	Proteomics	rps-5
WBGene00004475	-0.0780787	0.50817	0.696424	no	glp1ncl1 / glp1	Proteomics	rps-6
WBGene00004476	0.0699032	0.274472	0.484566	no	glp1ncl1 / glp1	Proteomics	rps-7
WBGene00004477	0.0551274	0.416043	0.619455	no	glp1ncl1 / glp1	Proteomics	rps-8
WBGene00004478	-0.102375	0.346387	0.55297	no	glp1ncl1 / glp1	Proteomics	rps-9
WBGene00004479	-0.053323	0.416959	0.620155	no	glp1ncl1 / glp1	Proteomics	rps-10
WBGene00004480	-0.129358	0.166489	0.354589	no	glp1ncl1 / glp1	Proteomics	rps-11
WBGene00004481	-0.0407244	0.692946	0.829844	no	glp1ncl1 / glp1	Proteomics	rps-12
WBGene00004482	0.0425796	0.477938	0.673127	no	glp1ncl1 / glp1	Proteomics	rps-13
WBGene00004483	-0.0229983	0.813993	0.895246	no	glp1ncl1 / glp1	Proteomics	rps-14
WBGene00004484	0.0909164	0.211766	0.413771	no	glp1ncl1 / glp1	Proteomics	rps-15
WBGene00004485	-0.0294615	0.689466	0.82848	no	glp1ncl1 / glp1	Proteomics	rps-16
WBGene00004486	0.10555	0.161867	0.349377	no	glp1ncl1 / glp1	Proteomics	rps-17
WBGene00004487	0.0365865	0.492208	0.68407	no	glp1ncl1 / glp1	Proteomics	rps-18
WBGene00004488	0.00868433	0.909553	0.944846	no	glp1ncl1 / glp1	Proteomics	rps-19
WBGene00004489	-0.0170252	0.821406	0.898864	no	glp1ncl1 / glp1	Proteomics	rps-20
WBGene00004490	-0.142719	0.272553	0.483929	no	glp1ncl1 / glp1	Proteomics	rps-21
WBGene00004491	0.0721758	0.281906	0.493618	no	glp1ncl1 / glp1	Proteomics	rps-22
WBGene00004492	0.0709638	0.501205	0.692161	no	glp1ncl1 / glp1	Proteomics	rps-23
WBGene00004493	0.0119299	0.866227	0.920838	no	glp1ncl1 / glp1	Proteomics	rps-24
WBGene00004494	0.0921132	0.132084	0.303327	no	glp1ncl1 / glp1	Proteomics	rps-25
WBGene00004495	-0.0119991	0.916117	0.948792	no	glp1ncl1 / glp1	Proteomics	rps-26
WBGene00004496	-0.147882	0.236534	0.441729	no	glp1ncl1 / glp1	Proteomics	rps-27
WBGene00004497	0.0554856	0.510174	0.697917	no	glp1ncl1 / glp1	Proteomics	rps-28
WBGene00004498	-0.0286731	0.717839	0.844307	no	glp1ncl1 / glp1	Proteomics	rps-29
WBGene00004499	0.191829	0.315886	0.524528	no	glp1ncl1 / glp1	Proteomics	rps-30
WBGene00004501	-0.100089	0.122395	0.289572	no	glp1ncl1 / glp1	Proteomics	rpt-1
WBGene00004502	-0.12791	0.0803073	0.221207	no	glp1ncl1 / glp1	Proteomics	rpt-2
WBGene00004503	-0.0444847	0.54694	0.723365	no	glp1ncl1 / glp1	Proteomics	rpt-3
WBGene00004504	-0.0859843	0.157732	0.344104	no	glp1ncl1 / glp1	Proteomics	rpt-4
WBGene00004505	0.0107497	0.880336	0.928077	no	glp1ncl1 / glp1	Proteomics	rpt-5
WBGene00004506	-0.0280888	0.705999	0.837756	no	glp1ncl1 / glp1	Proteomics	rpt-6
WBGene00004679	0.208312	0.000397196	0.00420918	yes	glp1ncl1 / glp1	Proteomics	rars-1
WBGene00004682	-0.0976303	0.358862	0.565143	no	glp1ncl1 / glp1	Proteomics	rsd-3
WBGene00004698	0.0847519	0.28419	0.495345	no	glp1ncl1 / glp1	Proteomics	rsp-1
WBGene00004699	-0.0818575	0.188969	0.386291	no	glp1ncl1 / glp1	Proteomics	rsp-2
WBGene00004700	0.0427026	0.561646	0.731291	no	glp1ncl1 / glp1	Proteomics	rsp-3
WBGene00004701	0.118488	0.254979	0.464742	no	glp1ncl1 / glp1	Proteomics	ndx-6,rsp-4
WBGene00004702	1.15186	0.125681	0.293032	no	glp1ncl1 / glp1	Proteomics	rsp-5
WBGene00004703	-0.0124362	0.903815	0.942096	no	glp1ncl1 / glp1	Proteomics	rsp-6
WBGene00004705	0.00458679	0.970643	0.980928	no	glp1ncl1 / glp1	Proteomics	rsp-8
WBGene00004706	0.498468	0.348392	0.554954	no	glp1ncl1 / glp1	Proteomics	F28D9.4,Y52B11C.1,rsr-1
WBGene00004728	-0.129678	0.525954	0.709223	no	glp1ncl1 / glp1	Proteomics	sax-2
WBGene00004732	0.0356899	0.628756	0.782931	no	glp1ncl1 / glp1	Proteomics	sax-7
WBGene00004736	-0.0419173	0.749319	0.863021	no	glp1ncl1 / glp1	Proteomics	sca-1
WBGene00004743	-0.0814167	0.502297	0.693043	no	glp1ncl1 / glp1	Proteomics	scm-1
WBGene00004754	-0.0485963	0.53634	0.716686	no	glp1ncl1 / glp1	Proteomics	sec-23
WBGene00004755	-0.0300017	0.581602	0.745743	no	glp1ncl1 / glp1	Proteomics	sec-24.1
WBGene00004756	0.0365955	0.677863	0.819506	no	glp1ncl1 / glp1	Proteomics	sec-24.2
WBGene00004759	-0.0685705	0.572211	0.740652	no	glp1ncl1 / glp1	Proteomics	sel-1
WBGene00004766	-0.115387	0.861326	0.919149	no	glp1ncl1 / glp1	Proteomics	sel-9
WBGene00004774	-0.061418	0.5761	0.74345	no	glp1ncl1 / glp1	Proteomics	sem-5
WBGene00004788	-0.363721	0.0351249	0.123212	no	glp1ncl1 / glp1	Proteomics	sft-4
WBGene00004789	-0.0868457	0.355408	0.562315	no	glp1ncl1 / glp1	Proteomics	sgk-1
WBGene00004798	-0.231712	0.754553	0.86494	no	glp1ncl1 / glp1	Proteomics	sip-1
WBGene00004806	0.0209588	0.791863	0.883967	no	glp1ncl1 / glp1	Proteomics	skp-1
WBGene00004807	0.511078	0.00792386	0.0416241	yes	glp1ncl1 / glp1	Proteomics	skr-1
WBGene00004808	0.203537	0.721726	0.847195	no	glp1ncl1 / glp1	Proteomics	skr-2
WBGene00004809	-0.0385276	0.683366	0.823758	no	glp1ncl1 / glp1	Proteomics	skr-3
WBGene00004810	0.0161338	0.863055	0.91972	no	glp1ncl1 / glp1	Proteomics	skr-4
WBGene00004813	0.849308	0.199597	0.399718	no	glp1ncl1 / glp1	Proteomics	skr-7
WBGene00004855	-0.0782839	0.278347	0.489071	no	glp1ncl1 / glp1	Proteomics	sma-1
WBGene00004873	0.19635	0.445254	0.643614	no	glp1ncl1 / glp1	Proteomics	smc-3
WBGene00004874	1.08947	0.317433	0.525429	no	glp1ncl1 / glp1	Proteomics	smc-4
WBGene00004880	0.103805	0.828012	0.902211	no	glp1ncl1 / glp1	Proteomics	smg-2
WBGene00004888	0.103122	0.355054	0.562046	no	glp1ncl1 / glp1	Proteomics	smo-1
WBGene00004891	0.666522	0.124138	0.291989	no	glp1ncl1 / glp1	Proteomics	smr-1
WBGene00004895	-0.593284	0.0875917	0.232813	no	glp1ncl1 / glp1	Proteomics	smu-1
WBGene00004897	-0.0686253	0.446686	0.64458	no	glp1ncl1 / glp1	Proteomics	snb-1
WBGene00004914	0.150573	0.0864785	0.231399	no	glp1ncl1 / glp1	Proteomics	snr-1
WBGene00004915	0.0719052	0.426048	0.627556	no	glp1ncl1 / glp1	Proteomics	snr-2
WBGene00004916	-0.0271126	0.877826	0.926391	no	glp1ncl1 / glp1	Proteomics	snr-3
WBGene00004917	0.132166	0.418083	0.620919	no	glp1ncl1 / glp1	Proteomics	snr-4
WBGene00004918	0.129046	0.665074	0.810626	no	glp1ncl1 / glp1	Proteomics	snr-5
WBGene00004919	-0.0819351	0.577049	0.744044	no	glp1ncl1 / glp1	Proteomics	snr-6
WBGene00004920	0.270592	0.143732	0.323503	no	glp1ncl1 / glp1	Proteomics	snr-7
WBGene00004927	-0.0335905	0.648134	0.798266	no	glp1ncl1 / glp1	Proteomics	snx-1
WBGene00004930	-0.0741865	0.493941	0.685542	no	glp1ncl1 / glp1	Proteomics	sod-1
WBGene00004931	0.0349744	0.647416	0.798026	no	glp1ncl1 / glp1	Proteomics	sod-2
WBGene00004951	-0.0719878	0.267275	0.479837	no	glp1ncl1 / glp1	Proteomics	spc-1
WBGene00004955	1.39432	0.00569652	0.0325275	yes	glp1ncl1 / glp1	Proteomics	spd-5
WBGene00004978	-0.230476	0.0475815	0.153641	no	glp1ncl1 / glp1	Proteomics	spg-7
WBGene00004980	-0.133603	0.321923	0.529414	no	glp1ncl1 / glp1	Proteomics	spk-1
WBGene00004981	-0.378503	0.00081502	0.0074698	yes	glp1ncl1 / glp1	Proteomics	spl-1
WBGene00004987	-0.361672	0.16096	0.348158	no	glp1ncl1 / glp1	Proteomics	spp-2
WBGene00004988	-0.40332	0.00145673	0.0113707	yes	glp1ncl1 / glp1	Proteomics	spp-3
WBGene00004990	-0.514612	5.90908e-08	2.69769e-06	yes	glp1ncl1 / glp1	Proteomics	spp-5
WBGene00004995	0.014632	0.929244	0.956014	no	glp1ncl1 / glp1	Proteomics	spp-10
WBGene00004999	-0.452983	0.000325111	0.00360814	yes	glp1ncl1 / glp1	Proteomics	spp-14
WBGene00005002	-0.713792	0.000168497	0.00217903	yes	glp1ncl1 / glp1	Proteomics	spp-17
WBGene00005007	0.355821	0.554976	0.727412	no	glp1ncl1 / glp1	Proteomics	spr-2
WBGene00005015	0.0982312	0.308902	0.51886	no	glp1ncl1 / glp1	Proteomics	spt-5
WBGene00005022	0.0075984	0.940549	0.963597	no	glp1ncl1 / glp1	Proteomics	sqv-4
WBGene00005647	-0.377126	0.274073	0.484566	no	glp1ncl1 / glp1	Proteomics	srp-6
WBGene00005648	-0.228165	0.0550617	0.170089	no	glp1ncl1 / glp1	Proteomics	srp-7
WBGene00005662	0.031696	0.967929	0.979483	no	glp1ncl1 / glp1	Proteomics	sars-2
WBGene00005663	0.327862	2.74529e-06	7.61694e-05	yes	glp1ncl1 / glp1	Proteomics	sars-1
WBGene00006039	0.773588	0.0905412	0.237807	no	glp1ncl1 / glp1	Proteomics	ssp-10
WBGene00006040	0.567916	0.0545818	0.169111	no	glp1ncl1 / glp1	Proteomics	ssp-11
WBGene00006044	0.632829	0.169645	0.359365	no	glp1ncl1 / glp1	Proteomics	ssp-16
WBGene00006048	0.105991	0.807337	0.893075	no	glp1ncl1 / glp1	Proteomics	ssp-31
WBGene00006050	-0.190179	0.685066	0.825433	no	glp1ncl1 / glp1	Proteomics	ssq-1
WBGene00006051	0.265968	0.708181	0.83904	no	glp1ncl1 / glp1	Proteomics	ssq-2
WBGene00006053	-0.118374	0.716918	0.844149	no	glp1ncl1 / glp1	Proteomics	ssq-4
WBGene00006059	-0.360378	0.0145706	0.0638931	no	glp1ncl1 / glp1	Proteomics	stc-1
WBGene00006060	-0.610484	0.0997573	0.254999	no	glp1ncl1 / glp1	Proteomics	sth-1
WBGene00006061	-0.126682	0.320043	0.527415	no	glp1ncl1 / glp1	Proteomics	stl-1
WBGene00006063	-0.184286	0.783417	0.879363	no	glp1ncl1 / glp1	Proteomics	sto-1
WBGene00006311	-0.0982481	0.755741	0.865812	no	glp1ncl1 / glp1	Proteomics	sun-1
WBGene00006331	-0.198814	0.086208	0.231353	no	glp1ncl1 / glp1	Proteomics	sup-26
WBGene00006351	-0.302587	0.00140183	0.011155	yes	glp1ncl1 / glp1	Proteomics	sur-5
WBGene00006352	-1.15123	0.0839864	0.226836	no	glp1ncl1 / glp1	Proteomics	sur-6
WBGene00006375	0.361162	0.177726	0.369496	no	glp1ncl1 / glp1	Proteomics	syp-1
WBGene00006381	0.411997	0.134878	0.308594	no	glp1ncl1 / glp1	Proteomics	tac-1
WBGene00006404	0.0259452	0.777321	0.876065	no	glp1ncl1 / glp1	Proteomics	tag-10
WBGene00006405	0.172838	0.117478	0.282011	no	glp1ncl1 / glp1	Proteomics	itsn-1
WBGene00006407	-0.0220174	0.856194	0.916888	no	glp1ncl1 / glp1	Proteomics	lim-9
WBGene00006408	-0.265764	4.2881e-05	0.000711265	yes	glp1ncl1 / glp1	Proteomics	tag-18
WBGene00006410	-0.0158271	0.841659	0.909963	no	glp1ncl1 / glp1	Proteomics	nck-1
WBGene00006414	-0.271317	0.116574	0.281251	no	glp1ncl1 / glp1	Proteomics	raga-1
WBGene00006416	-0.654276	0.0965614	0.248907	no	glp1ncl1 / glp1	Proteomics	sams-5
WBGene00006423	0.177951	0.731217	0.854393	no	glp1ncl1 / glp1	Proteomics	asd-2
WBGene00006433	0.0351484	0.58464	0.748771	no	glp1ncl1 / glp1	Proteomics	sdhb-1
WBGene00006434	-0.0952538	0.268262	0.481043	no	glp1ncl1 / glp1	Proteomics	prdx-2
WBGene00006436	-0.0491588	0.485564	0.679789	no	glp1ncl1 / glp1	Proteomics	ttn-1
WBGene00006438	-0.142158	0.0630714	0.186887	no	glp1ncl1 / glp1	Proteomics	nrfl-1
WBGene00006439	-0.174064	0.0313002	0.112784	no	glp1ncl1 / glp1	Proteomics	ant-1.1
WBGene00006448	-0.0776625	0.433859	0.634773	no	glp1ncl1 / glp1	Proteomics	glod-4
WBGene00006452	-0.149963	0.149353	0.332175	no	glp1ncl1 / glp1	Proteomics	heh-1
WBGene00006460	0.0192	0.838807	0.908137	no	glp1ncl1 / glp1	Proteomics	ppm-1
WBGene00006461	0.0977243	0.335652	0.54259	no	glp1ncl1 / glp1	Proteomics	tag-96
WBGene00006478	-0.239976	0.159494	0.345967	no	glp1ncl1 / glp1	Proteomics	tag-131
WBGene00006481	0.212952	0.0827235	0.225023	no	glp1ncl1 / glp1	Proteomics	plrg-1
WBGene00006493	-0.300079	0.000802884	0.00740303	yes	glp1ncl1 / glp1	Proteomics	tag-147
WBGene00006495	0.00740752	0.92296	0.952712	no	glp1ncl1 / glp1	Proteomics	cpna-1
WBGene00006497	1.61541	9.45789e-11	1.06473e-08	yes	glp1ncl1 / glp1	Proteomics	tag-151
WBGene00006499	-0.0507936	0.887515	0.932715	no	glp1ncl1 / glp1	Proteomics	tag-153
WBGene00006503	0.0375671	0.63166	0.785906	no	glp1ncl1 / glp1	Proteomics	snx-3
WBGene00006504	-0.891414	0.0514748	0.162127	no	glp1ncl1 / glp1	Proteomics	kcc-1
WBGene00006508	-0.00707253	0.929503	0.956014	no	glp1ncl1 / glp1	Proteomics	tag-163
WBGene00006510	0.0616881	0.223501	0.427665	no	glp1ncl1 / glp1	Proteomics	mtrr-1
WBGene00006512	0.369126	8.81779e-06	0.000210249	yes	glp1ncl1 / glp1	Proteomics	abcf-1
WBGene00006515	-0.036903	0.881489	0.928651	no	glp1ncl1 / glp1	Proteomics	txdc-9
WBGene00006518	-0.228247	0.00684101	0.0366923	yes	glp1ncl1 / glp1	Proteomics	tag-173
WBGene00006519	-0.00674159	0.916405	0.948792	no	glp1ncl1 / glp1	Proteomics	tag-174
WBGene00006527	-0.155827	0.0655221	0.191913	no	glp1ncl1 / glp1	Proteomics	tax-6
WBGene00006528	0.00984722	0.93535	0.960205	no	glp1ncl1 / glp1	Proteomics	tba-1
WBGene00006529	-0.113014	0.358095	0.564518	no	glp1ncl1 / glp1	Proteomics	tba-2
WBGene00006530	-0.109625	0.290083	0.501397	no	glp1ncl1 / glp1	Proteomics	tba-4
WBGene00006533	0.0944631	0.234493	0.439873	no	glp1ncl1 / glp1	Proteomics	tba-7
WBGene00006536	0.0196137	0.776819	0.875981	no	glp1ncl1 / glp1	Proteomics	tbb-1
WBGene00006537	-0.04514	0.478641	0.673248	no	glp1ncl1 / glp1	Proteomics	tbb-2
WBGene00006539	-0.937981	0.0740576	0.209184	no	glp1ncl1 / glp1	Proteomics	tbb-6
WBGene00006541	-0.318063	0.120335	0.286549	no	glp1ncl1 / glp1	Proteomics	tbh-1
WBGene00006563	0.529536	0.297733	0.507927	no	glp1ncl1 / glp1	Proteomics	teg-1
WBGene00006565	0.208431	0.0535963	0.166873	no	glp1ncl1 / glp1	Proteomics	tfg-1
WBGene00006566	0.151917	0.715416	0.843031	no	glp1ncl1 / glp1	Proteomics	tgt-1
WBGene00006567	0.564877	0.220957	0.425956	no	glp1ncl1 / glp1	Proteomics	tgt-2
WBGene00006572	1.36152	0.00290576	0.019523	yes	glp1ncl1 / glp1	Proteomics	tin-9.1
WBGene00006573	0.398889	0.000309813	0.00348911	yes	glp1ncl1 / glp1	Proteomics	tin-10
WBGene00006574	0.317781	4.01623e-05	0.000677212	yes	glp1ncl1 / glp1	Proteomics	tin-13
WBGene00006578	-0.0866909	0.468687	0.665317	no	glp1ncl1 / glp1	Proteomics	tli-1
WBGene00006583	0.0428518	0.688848	0.828354	no	glp1ncl1 / glp1	Proteomics	tnc-2
WBGene00006585	-0.124312	0.420008	0.622264	no	glp1ncl1 / glp1	Proteomics	tni-3
WBGene00006586	-0.0219368	0.831156	0.904667	no	glp1ncl1 / glp1	Proteomics	tni-4
WBGene00006587	0.0204873	0.672312	0.816937	no	glp1ncl1 / glp1	Proteomics	tnt-2
WBGene00006588	0.0270263	0.939536	0.963366	no	glp1ncl1 / glp1	Proteomics	tnt-3
WBGene00006589	-0.101861	0.42851	0.628881	no	glp1ncl1 / glp1	Proteomics	tnt-4
WBGene00006595	-0.98664	0.0982395	0.251955	no	glp1ncl1 / glp1	Proteomics	top-1
WBGene00006601	-0.128519	0.225996	0.429476	no	glp1ncl1 / glp1	Proteomics	tpi-1
WBGene00006602	0.285532	0.474306	0.669317	no	glp1ncl1 / glp1	Proteomics	tps-1
WBGene00006603	-0.69521	0.28725	0.499251	no	glp1ncl1 / glp1	Proteomics	tps-2
WBGene00006613	0.836245	1.17416e-06	3.67949e-05	yes	glp1ncl1 / glp1	Proteomics	trm-1
WBGene00006617	0.298666	0.000607282	0.00591144	yes	glp1ncl1 / glp1	Proteomics	tars-1
WBGene00006626	0.0190911	0.700527	0.835812	no	glp1ncl1 / glp1	Proteomics	tsn-1
WBGene00006649	-0.0117127	0.906005	0.942578	no	glp1ncl1 / glp1	Proteomics	tth-1
WBGene00006663	-0.0800134	0.855254	0.916838	no	glp1ncl1 / glp1	Proteomics	twk-8
WBGene00006672	-0.1939	0.0536045	0.166873	no	glp1ncl1 / glp1	Proteomics	twk-18
WBGene00006697	0.0652453	0.389571	0.596794	no	glp1ncl1 / glp1	Proteomics	uaf-1
WBGene00006698	0.0481498	0.560475	0.731052	no	glp1ncl1 / glp1	Proteomics	uaf-2
WBGene00006699	-0.0202072	0.737269	0.856717	no	glp1ncl1 / glp1	Proteomics	uba-1
WBGene00006700	0.648951	0.226344	0.42987	no	glp1ncl1 / glp1	Proteomics	uba-2
WBGene00006704	0.202537	0.0207843	0.0837963	no	glp1ncl1 / glp1	Proteomics	ubc-7
WBGene00006706	-0.162722	0.108108	0.267378	no	glp1ncl1 / glp1	Proteomics	F29B9.5,ubc-9
WBGene00006707	0.557488	0.0980083	0.251786	no	glp1ncl1 / glp1	Proteomics	ubc-12
WBGene00006708	-0.00565483	0.956639	0.973006	no	glp1ncl1 / glp1	Proteomics	ubc-13
WBGene00006713	-0.11018	0.303317	0.513151	no	glp1ncl1 / glp1	Proteomics	ubc-18
WBGene00006715	-0.0351082	0.753713	0.864873	no	glp1ncl1 / glp1	Proteomics	ubc-20
WBGene00006721	-0.26501	0.223481	0.427665	no	glp1ncl1 / glp1	Proteomics	ubh-1
WBGene00006723	0.197691	0.0384023	0.131925	no	glp1ncl1 / glp1	Proteomics	ubh-3
WBGene00006724	0.062905	0.491252	0.683053	no	glp1ncl1 / glp1	Proteomics	ubh-4
WBGene00006725	-0.215725	0.337521	0.543596	no	glp1ncl1 / glp1	Proteomics	ubl-1
WBGene00006728	-0.189186	0.218373	0.422746	no	glp1ncl1 / glp1	Proteomics	ubq-2
WBGene00006730	-0.0949567	0.246607	0.455873	no	glp1ncl1 / glp1	Proteomics	uev-1
WBGene00006733	-0.191224	0.163809	0.351599	no	glp1ncl1 / glp1	Proteomics	F19B6.1,ufd-1
WBGene00006735	-0.00797748	0.948106	0.967765	no	glp1ncl1 / glp1	Proteomics	ula-1
WBGene00006751	0.197136	0.734	0.855026	no	glp1ncl1 / glp1	Proteomics	unc-11
WBGene00006754	-0.112912	0.204023	0.404862	no	glp1ncl1 / glp1	Proteomics	unc-15
WBGene00006755	-0.140875	0.291046	0.501968	no	glp1ncl1 / glp1	Proteomics	unc-16
WBGene00006757	0.0398382	0.695453	0.83171	no	glp1ncl1 / glp1	Proteomics	unc-18
WBGene00006759	-0.121118	0.0594698	0.179705	no	glp1ncl1 / glp1	Proteomics	unc-22
WBGene00006760	-0.105045	0.340628	0.547435	no	glp1ncl1 / glp1	Proteomics	unc-23
WBGene00006762	-0.0887312	0.785759	0.88102	no	glp1ncl1 / glp1	Proteomics	unc-25
WBGene00006764	-0.0694824	0.397822	0.604658	no	glp1ncl1 / glp1	Proteomics	unc-27
WBGene00006768	-0.0367674	0.716767	0.844149	no	glp1ncl1 / glp1	Proteomics	unc-32
WBGene00006769	-0.0103513	0.928196	0.956014	no	glp1ncl1 / glp1	Proteomics	unc-33
WBGene00006771	0.0170681	0.748941	0.863021	no	glp1ncl1 / glp1	Proteomics	tln-1
WBGene00006779	-0.102944	0.12286	0.290402	no	glp1ncl1 / glp1	Proteomics	unc-43
WBGene00006780	-0.0841258	0.158479	0.344499	no	glp1ncl1 / glp1	Proteomics	unc-44
WBGene00006781	0.335805	5.05682e-05	0.000816239	yes	glp1ncl1 / glp1	Proteomics	unc-45
WBGene00006787	-0.171023	0.00564529	0.0324471	yes	glp1ncl1 / glp1	Proteomics	unc-52
WBGene00006789	0.019843	0.663362	0.809833	no	glp1ncl1 / glp1	Proteomics	unc-54
WBGene00006791	0.310425	0.0119278	0.0553706	no	glp1ncl1 / glp1	Proteomics	unc-57
WBGene00006793	-0.815738	0.0888427	0.235167	no	glp1ncl1 / glp1	Proteomics	unc-59
WBGene00006794	-0.123605	0.11604	0.28063	no	glp1ncl1 / glp1	Proteomics	unc-60
WBGene00006801	-1.35415	0.180274	0.374028	no	glp1ncl1 / glp1	Proteomics	unc-68
WBGene00006803	-0.0759099	0.294381	0.5056	no	glp1ncl1 / glp1	Proteomics	unc-70
WBGene00006805	0.124549	0.394448	0.601627	no	glp1ncl1 / glp1	Proteomics	unc-73
WBGene00006810	-0.218732	0.0409147	0.138174	no	glp1ncl1 / glp1	Proteomics	unc-78
WBGene00006819	-0.155468	0.0046059	0.027781	yes	glp1ncl1 / glp1	Proteomics	unc-87
WBGene00006820	-0.0854788	0.157073	0.3434	no	glp1ncl1 / glp1	Proteomics	unc-89
WBGene00006823	0.0194389	0.828972	0.902712	no	glp1ncl1 / glp1	Proteomics	unc-94
WBGene00006824	0.0513499	0.687976	0.827632	no	glp1ncl1 / glp1	Proteomics	unc-95
WBGene00006825	0.252381	0.0836067	0.226413	no	glp1ncl1 / glp1	Proteomics	unc-96
WBGene00006826	0.0249495	0.860024	0.918296	no	glp1ncl1 / glp1	Proteomics	unc-97
WBGene00006827	-0.446233	0.457555	0.654692	no	glp1ncl1 / glp1	Proteomics	unc-98
WBGene00006833	-0.222084	0.0303331	0.110318	no	glp1ncl1 / glp1	Proteomics	unc-108
WBGene00006836	-0.0934945	0.197928	0.397943	no	glp1ncl1 / glp1	Proteomics	unc-112
WBGene00006839	-0.0528405	0.467802	0.66468	no	glp1ncl1 / glp1	Proteomics	unc-115
WBGene00006840	-0.0336937	0.547133	0.723365	no	glp1ncl1 / glp1	Proteomics	unc-116
WBGene00006856	-0.00906488	0.912217	0.946646	no	glp1ncl1 / glp1	Proteomics	usp-14
WBGene00006861	-0.435771	0.000693549	0.00657364	yes	glp1ncl1 / glp1	Proteomics	cal-5
WBGene00006863	0.28778	0.00343045	0.0223712	yes	glp1ncl1 / glp1	Proteomics	gyg-1
WBGene00006876	-0.141781	0.0520675	0.16332	no	glp1ncl1 / glp1	Proteomics	vab-10
WBGene00006888	-0.0105641	0.91563	0.948792	no	glp1ncl1 / glp1	Proteomics	vbh-1
WBGene00006889	0.650717	0.0062518	0.0348184	yes	glp1ncl1 / glp1	Proteomics	pfd-3
WBGene00006890	-0.395386	0.029734	0.108869	no	glp1ncl1 / glp1	Proteomics	vem-1
WBGene00006893	-0.506366	0.0827247	0.225023	no	glp1ncl1 / glp1	Proteomics	spon-1
WBGene00006910	0.575601	0.0336217	0.119041	no	glp1ncl1 / glp1	Proteomics	vha-1
WBGene00006911	-0.348936	0.417855	0.620882	no	glp1ncl1 / glp1	Proteomics	vha-2
WBGene00006914	-0.327269	0.00514997	0.0301106	yes	glp1ncl1 / glp1	Proteomics	vha-5
WBGene00006915	-0.454169	0.0151452	0.0655648	no	glp1ncl1 / glp1	Proteomics	vha-6
WBGene00006917	-0.227313	0.000798431	0.00740303	yes	glp1ncl1 / glp1	Proteomics	vha-8
WBGene00006918	-0.126318	0.144725	0.324943	no	glp1ncl1 / glp1	Proteomics	vha-9
WBGene00006919	-0.314116	0.000138707	0.00184862	yes	glp1ncl1 / glp1	Proteomics	vha-10
WBGene00006920	-0.186442	0.040966	0.138174	no	glp1ncl1 / glp1	Proteomics	vha-11
WBGene00006921	-0.332927	6.43348e-06	0.000162085	yes	glp1ncl1 / glp1	Proteomics	vha-12
WBGene00006924	0.385094	7.00177e-06	0.000170955	yes	glp1ncl1 / glp1	Proteomics	vig-1
WBGene00006925	-0.470345	0.0128165	0.0580355	no	glp1ncl1 / glp1	Proteomics	vit-1
WBGene00006926	-0.372934	0.0366864	0.12738	no	glp1ncl1 / glp1	Proteomics	vit-2
WBGene00006927	-0.613515	0.00525582	0.0306707	yes	glp1ncl1 / glp1	Proteomics	vit-3
WBGene00006928	-0.523149	0.0136704	0.0609083	no	glp1ncl1 / glp1	Proteomics	vit-4
WBGene00006929	-0.531315	0.0251839	0.096681	no	glp1ncl1 / glp1	Proteomics	vit-5
WBGene00006930	-0.254543	0.168819	0.358301	no	glp1ncl1 / glp1	Proteomics	vit-6
WBGene00006931	-0.28086	0.317255	0.525429	no	glp1ncl1 / glp1	Proteomics	vps-26
WBGene00006933	0.150357	0.469473	0.665865	no	glp1ncl1 / glp1	Proteomics	vps-35
WBGene00006935	0.763708	0.283369	0.494761	no	glp1ncl1 / glp1	Proteomics	vars-1
WBGene00006936	-0.028866	0.619509	0.776486	no	glp1ncl1 / glp1	Proteomics	vars-2
WBGene00006937	0.0964326	0.215953	0.419802	no	glp1ncl1 / glp1	Proteomics	wah-1
WBGene00006942	-0.304511	0.000188608	0.0024085	yes	glp1ncl1 / glp1	Proteomics	wrk-1
WBGene00006945	0.517819	3.18253e-07	1.15632e-05	yes	glp1ncl1 / glp1	Proteomics	wars-1
WBGene00006984	-0.205146	0.678201	0.819506	no	glp1ncl1 / glp1	Proteomics	zig-7
WBGene00006994	-0.044692	0.471269	0.66743	no	glp1ncl1 / glp1	Proteomics	zyg-9
WBGene00006997	-0.470815	0.288637	0.500821	no	glp1ncl1 / glp1	Proteomics	zyg-12
WBGene00006999	-0.577466	0.159433	0.345967	no	glp1ncl1 / glp1	Proteomics	zyx-1
WBGene00007000	0.14481	0.0038572	0.0244744	yes	glp1ncl1 / glp1	Proteomics	tufm-1
WBGene00007001	0.567484	2.66396e-07	9.93171e-06	yes	glp1ncl1 / glp1	Proteomics	tufm-2
WBGene00007010	-0.13017	0.0211469	0.084886	no	glp1ncl1 / glp1	Proteomics	alx-1
WBGene00007024	-0.173542	0.0676544	0.195531	no	glp1ncl1 / glp1	Proteomics	plin-1
WBGene00007050	0.487054	0.181786	0.376654	no	glp1ncl1 / glp1	Proteomics	tag-184
WBGene00007070	-0.252913	0.0991197	0.253786	no	glp1ncl1 / glp1	Proteomics	ugt-49
WBGene00007071	-0.0729248	0.294174	0.505528	no	glp1ncl1 / glp1	Proteomics	AC3.5
WBGene00007089	0.374381	0.00281736	0.019108	yes	glp1ncl1 / glp1	Proteomics	B0001.4
WBGene00007100	-0.0541872	0.862032	0.919335	no	glp1ncl1 / glp1	Proteomics	B0024.10
WBGene00007101	1.55448	0.000232869	0.00282553	yes	glp1ncl1 / glp1	Proteomics	B0024.11
WBGene00007105	0.207076	0.720753	0.846499	no	glp1ncl1 / glp1	Proteomics	B0035.1
WBGene00007106	-0.379452	0.293581	0.504794	no	glp1ncl1 / glp1	Proteomics	B0035.3
WBGene00007107	0.140543	0.107182	0.265951	no	glp1ncl1 / glp1	Proteomics	pfd-4
WBGene00007108	-0.0212866	0.803306	0.8912	no	glp1ncl1 / glp1	Proteomics	gspd-1
WBGene00007110	-0.0565019	0.667482	0.812587	no	glp1ncl1 / glp1	Proteomics	leo-1
WBGene00007111	-0.840199	0.0940898	0.245019	no	glp1ncl1 / glp1	Proteomics	sart-3
WBGene00007113	0.0357116	0.820189	0.898499	no	glp1ncl1 / glp1	Proteomics	B0035.15
WBGene00007122	0.0557418	0.449868	0.647641	no	glp1ncl1 / glp1	Proteomics	B0250.5
WBGene00007129	-0.0235464	0.662815	0.809833	no	glp1ncl1 / glp1	Proteomics	B0272.3
WBGene00007137	-0.05909	0.542092	0.720082	no	glp1ncl1 / glp1	Proteomics	B0285.4
WBGene00007142	-0.186817	0.0825271	0.225023	no	glp1ncl1 / glp1	Proteomics	ttr-18
WBGene00007143	-0.117771	0.0573294	0.174941	no	glp1ncl1 / glp1	Proteomics	B0334.3
WBGene00007150	-0.415632	0.0254483	0.0972457	no	glp1ncl1 / glp1	Proteomics	acly-2
WBGene00007153	-0.0904446	0.676531	0.819506	no	glp1ncl1 / glp1	Proteomics	clec-41
WBGene00007155	-0.12493	0.149051	0.332175	no	glp1ncl1 / glp1	Proteomics	B0379.1
WBGene00007175	-0.261856	0.0250321	0.0965076	no	glp1ncl1 / glp1	Proteomics	B0395.3
WBGene00007190	0.180934	0.711054	0.841138	no	glp1ncl1 / glp1	Proteomics	rmd-3
WBGene00007192	-0.105653	0.295938	0.506563	no	glp1ncl1 / glp1	Proteomics	B0491.5
WBGene00007194	2.11732	0.000569107	0.00560295	yes	glp1ncl1 / glp1	Proteomics	B0491.1,B0491.7
WBGene00007196	-0.364473	0.159699	0.346166	no	glp1ncl1 / glp1	Proteomics	B0513.4
WBGene00007197	-0.00076665	0.989965	0.993872	no	glp1ncl1 / glp1	Proteomics	B0513.5
WBGene00007201	0.30389	0.526573	0.709223	no	glp1ncl1 / glp1	Proteomics	exos-4.1,tin-9.2
WBGene00007202	-0.30987	0.141061	0.319849	no	glp1ncl1 / glp1	Proteomics	B0564.2
WBGene00007216	-0.485225	0.0252949	0.0968633	no	glp1ncl1 / glp1	Proteomics	C01A2.4
WBGene00007223	0.979741	0.00416962	0.0259179	yes	glp1ncl1 / glp1	Proteomics	C01F6.9
WBGene00007235	0.145608	0.0958606	0.247573	no	glp1ncl1 / glp1	Proteomics	C01G10.8
WBGene00007236	-0.446488	0.291196	0.501968	no	glp1ncl1 / glp1	Proteomics	C01G10.9
WBGene00007296	0.0579273	0.423945	0.62597	no	glp1ncl1 / glp1	Proteomics	arrd-25
WBGene00007297	0.302232	0.218437	0.422746	no	glp1ncl1 / glp1	Proteomics	C04F12.1
WBGene00007308	0.0350128	0.916221	0.948792	no	glp1ncl1 / glp1	Proteomics	C04G2.9
WBGene00007312	2.71762	0.000262136	0.00305359	yes	glp1ncl1 / glp1	Proteomics	C04H5.1
WBGene00007330	-0.20344	0.025746	0.0981216	no	glp1ncl1 / glp1	Proteomics	C05C10.3
WBGene00007333	0.00770132	0.948014	0.967765	no	glp1ncl1 / glp1	Proteomics	flad-1,ufd-3
WBGene00007337	-0.0886528	0.812485	0.894308	no	glp1ncl1 / glp1	Proteomics	C05C12.5
WBGene00007350	-0.120651	0.0148137	0.0646803	no	glp1ncl1 / glp1	Proteomics	sucl-1
WBGene00007352	-0.0942924	0.267069	0.479749	no	glp1ncl1 / glp1	Proteomics	cdc-48.1
WBGene00007363	-0.423518	0.188577	0.386007	no	glp1ncl1 / glp1	Proteomics	stdh-1
WBGene00007385	-0.185567	0.00150488	0.0115983	yes	glp1ncl1 / glp1	Proteomics	atp-5
WBGene00007400	-0.55576	0.100309	0.255119	no	glp1ncl1 / glp1	Proteomics	C07A9.2
WBGene00007436	-0.577263	0.0736439	0.208417	no	glp1ncl1 / glp1	Proteomics	C08B11.9
WBGene00007443	0.122472	0.35456	0.561887	no	glp1ncl1 / glp1	Proteomics	pfd-1
WBGene00007444	-0.253951	0.487988	0.6805	no	glp1ncl1 / glp1	Proteomics	C08F8.2
WBGene00007445	-0.303409	0.34682	0.553317	no	glp1ncl1 / glp1	Proteomics	C08F8.3
WBGene00007449	1.08432	0.0713588	0.203892	no	glp1ncl1 / glp1	Proteomics	C08F8.9
WBGene00007455	-0.455454	0.0115158	0.0545747	no	glp1ncl1 / glp1	Proteomics	ugt-22
WBGene00007458	-0.407486	0.00866993	0.0440277	yes	glp1ncl1 / glp1	Proteomics	C08F11.11
WBGene00007463	-0.0507106	0.291262	0.501968	no	glp1ncl1 / glp1	Proteomics	vgln-1
WBGene00007480	0.015352	0.910328	0.945329	no	glp1ncl1 / glp1	Proteomics	glna-1
WBGene00007500	-0.614144	0.210988	0.413043	no	glp1ncl1 / glp1	Proteomics	apc-17,nasp-1
WBGene00007505	0.0897228	0.904178	0.942096	no	glp1ncl1 / glp1	Proteomics	pezo-1
WBGene00007507	-0.212053	0.0591003	0.178943	no	glp1ncl1 / glp1	Proteomics	C10C5.3
WBGene00007514	-0.577205	0.225745	0.429267	no	glp1ncl1 / glp1	Proteomics	catp-8
WBGene00007516	-0.19651	0.116904	0.281382	no	glp1ncl1 / glp1	Proteomics	gpx-5
WBGene00007533	-0.547118	0.000823476	0.00752469	yes	glp1ncl1 / glp1	Proteomics	cbl-1
WBGene00007534	0.0461277	0.62664	0.781253	no	glp1ncl1 / glp1	Proteomics	C12D8.1
WBGene00007554	0.456233	0.258863	0.468932	no	glp1ncl1 / glp1	Proteomics	pptr-2
WBGene00007555	0.618089	9.13394e-07	3.03009e-05	yes	glp1ncl1 / glp1	Proteomics	dohh-1,rpb-6
WBGene00007556	-0.0285033	0.837931	0.908137	no	glp1ncl1 / glp1	Proteomics	C14A4.3
WBGene00007564	0.405198	0.000109965	0.00153951	yes	glp1ncl1 / glp1	Proteomics	mrps-22
WBGene00007587	0.142595	0.0143357	0.0632262	no	glp1ncl1 / glp1	Proteomics	mma-1
WBGene00007588	-0.0745367	0.845544	0.911551	no	glp1ncl1 / glp1	Proteomics	C14C10.5
WBGene00007593	-0.338676	0.245428	0.454795	no	glp1ncl1 / glp1	Proteomics	C14H10.3
WBGene00007605	-0.231435	0.0483505	0.154519	no	glp1ncl1 / glp1	Proteomics	asp-10
WBGene00007616	0.572851	0.0318609	0.114131	no	glp1ncl1 / glp1	Proteomics	rpoa-12
WBGene00007617	1.8073	1.62664e-07	6.36474e-06	yes	glp1ncl1 / glp1	Proteomics	rrbs-1
WBGene00007621	-0.0110412	0.939692	0.963366	no	glp1ncl1 / glp1	Proteomics	C16C2.4
WBGene00007623	0.995604	2.01364e-05	0.000403803	yes	glp1ncl1 / glp1	Proteomics	C16C10.2
WBGene00007624	0.119407	0.672394	0.816937	no	glp1ncl1 / glp1	Proteomics	hrde-1
WBGene00007625	-0.0133774	0.916772	0.948792	no	glp1ncl1 / glp1	Proteomics	C16C10.4
WBGene00007628	0.980021	0.010008	0.0489496	yes	glp1ncl1 / glp1	Proteomics	C16C10.8
WBGene00007630	-0.545381	0.529622	0.711325	no	glp1ncl1 / glp1	Proteomics	har-1
WBGene00007646	-0.330971	0.00856316	0.0437768	yes	glp1ncl1 / glp1	Proteomics	nkb-1
WBGene00007650	-0.606677	0.201781	0.402042	no	glp1ncl1 / glp1	Proteomics	ugt-23
WBGene00007653	-0.0918233	0.0962763	0.248381	no	glp1ncl1 / glp1	Proteomics	cysl-1
WBGene00007681	0.422023	0.368306	0.57556	no	glp1ncl1 / glp1	Proteomics	C18D11.3
WBGene00007683	-0.236339	0.523806	0.708624	no	glp1ncl1 / glp1	Proteomics	C18E9.2
WBGene00007684	0.0918578	0.336985	0.543361	no	glp1ncl1 / glp1	Proteomics	C18E9.4
WBGene00007685	-0.273359	0.255517	0.464742	no	glp1ncl1 / glp1	Proteomics	C18E9.5
WBGene00007686	0.176021	0.0165344	0.0703806	no	glp1ncl1 / glp1	Proteomics	tomm-40
WBGene00007696	-0.62266	0.0891271	0.235308	no	glp1ncl1 / glp1	Proteomics	tram-1
WBGene00007703	0.0600906	0.589548	0.753161	no	glp1ncl1 / glp1	Proteomics	gbf-1
WBGene00007708	1.3002	2.92329e-11	4.46094e-09	yes	glp1ncl1 / glp1	Proteomics	C25A1.16,nola-3
WBGene00007712	0.396454	0.000235951	0.00282553	yes	glp1ncl1 / glp1	Proteomics	mrpl-34
WBGene00007733	0.176223	0.644443	0.796613	no	glp1ncl1 / glp1	Proteomics	smz-1
WBGene00007762	-0.0935674	0.77027	0.872332	no	glp1ncl1 / glp1	Proteomics	C27B7.5
WBGene00007784	0.213005	0.0162932	0.0695479	no	glp1ncl1 / glp1	Proteomics	ruvb-1
WBGene00007786	-0.209748	0.00114614	0.00959925	yes	glp1ncl1 / glp1	Proteomics	rmd-2
WBGene00007787	0.0761343	0.370267	0.577701	no	glp1ncl1 / glp1	Proteomics	C27H6.8
WBGene00007811	0.0244152	0.863416	0.919771	no	glp1ncl1 / glp1	Proteomics	C29F7.2
WBGene00007812	-0.0442076	0.418989	0.621416	no	glp1ncl1 / glp1	Proteomics	C29F7.3
WBGene00007824	-0.141797	0.201226	0.401399	no	glp1ncl1 / glp1	Proteomics	C30H6.7
WBGene00007825	-0.0970073	0.43646	0.636748	no	glp1ncl1 / glp1	Proteomics	C30H6.8
WBGene00007836	-0.124717	0.114944	0.27913	no	glp1ncl1 / glp1	Proteomics	C31C9.2
WBGene00007848	-0.252113	0.0663935	0.193465	no	glp1ncl1 / glp1	Proteomics	cytb-5.1
WBGene00007859	0.395602	1.00329e-06	3.2232e-05	yes	glp1ncl1 / glp1	Proteomics	mrps-31
WBGene00007867	-1.17257	0.00291054	0.019523	yes	glp1ncl1 / glp1	Proteomics	C32H11.4
WBGene00007875	-0.695899	0.0202146	0.0819324	no	glp1ncl1 / glp1	Proteomics	dod-24
WBGene00007880	0.0153294	0.843475	0.909963	no	glp1ncl1 / glp1	Proteomics	C33A12.1
WBGene00007924	0.195148	0.648101	0.798266	no	glp1ncl1 / glp1	Proteomics	rsu-1
WBGene00007927	0.130375	0.0956715	0.247573	no	glp1ncl1 / glp1	Proteomics	C34C12.8
WBGene00007934	-0.274714	0.0100568	0.0489547	yes	glp1ncl1 / glp1	Proteomics	C34E7.4
WBGene00007942	-0.273624	0.000983124	0.00860138	yes	glp1ncl1 / glp1	Proteomics	idh-2
WBGene00007958	0.620514	0.112609	0.274945	no	glp1ncl1 / glp1	Proteomics	C35C5.9
WBGene00007965	-0.235214	0.120365	0.286549	no	glp1ncl1 / glp1	Proteomics	C36A4.4
WBGene00007966	-0.801483	0.0864294	0.231399	no	glp1ncl1 / glp1	Proteomics	maph-1.3
WBGene00007969	-0.260875	0.0282201	0.105145	no	glp1ncl1 / glp1	Proteomics	acs-19
WBGene00007971	0.0878751	0.487414	0.6805	no	glp1ncl1 / glp1	Proteomics	rpb-3
WBGene00007972	0.0371515	0.875787	0.92552	no	glp1ncl1 / glp1	Proteomics	prp-4
WBGene00007974	0.216752	0.0674004	0.194982	no	glp1ncl1 / glp1	Proteomics	dhfr-1
WBGene00007975	-0.25995	0.4621	0.658111	no	glp1ncl1 / glp1	Proteomics	gls-1
WBGene00007993	-0.226239	0.0708301	0.203031	no	glp1ncl1 / glp1	Proteomics	idhb-1
WBGene00007999	-1.21537	0.116814	0.281382	no	glp1ncl1 / glp1	Proteomics	tag-297
WBGene00008005	-0.673963	0.0775713	0.215421	no	glp1ncl1 / glp1	Proteomics	C38D4.4
WBGene00008032	-0.157507	0.214022	0.416312	no	glp1ncl1 / glp1	Proteomics	C39E9.8
WBGene00008040	0.161427	0.342153	0.54874	no	glp1ncl1 / glp1	Proteomics	ttr-5
WBGene00008041	0.264898	0.188775	0.386153	no	glp1ncl1 / glp1	Proteomics	ufc-1
WBGene00008053	-0.0165867	0.728969	0.852745	no	glp1ncl1 / glp1	Proteomics	cdc-48.2
WBGene00008089	-0.100569	0.725914	0.850149	no	glp1ncl1 / glp1	Proteomics	C44C10.9
WBGene00008117	-0.047804	0.611934	0.771745	no	glp1ncl1 / glp1	Proteomics	gsr-1
WBGene00008131	0.300799	0.123524	0.291117	no	glp1ncl1 / glp1	Proteomics	C47B2.2
WBGene00008132	0.0673614	0.391008	0.597369	no	glp1ncl1 / glp1	Proteomics	gale-1
WBGene00008134	-0.0668784	0.921973	0.95256	no	glp1ncl1 / glp1	Proteomics	C47B2.9
WBGene00008149	0.248713	0.00214531	0.0154787	yes	glp1ncl1 / glp1	Proteomics	pyp-1
WBGene00008151	1.69734	6.4952e-11	8.25973e-09	yes	glp1ncl1 / glp1	Proteomics	C47E12.7
WBGene00008166	0.829468	0.025786	0.0981216	no	glp1ncl1 / glp1	Proteomics	saps-1
WBGene00008167	-0.128185	0.377713	0.584573	no	glp1ncl1 / glp1	Proteomics	acox-5
WBGene00008194	-0.309988	0.172859	0.363166	no	glp1ncl1 / glp1	Proteomics	C49C3.4
WBGene00008205	-0.333283	9.17177e-06	0.00021618	yes	glp1ncl1 / glp1	Proteomics	sams-1
WBGene00008211	1.94246	0.0194576	0.0798182	no	glp1ncl1 / glp1	Proteomics	C49F5.7
WBGene00008215	-0.361772	0.0101953	0.0494489	yes	glp1ncl1 / glp1	Proteomics	C49F8.3
WBGene00008218	1.15905	0.327916	0.534615	no	glp1ncl1 / glp1	Proteomics	nasp-2
WBGene00008229	0.180403	0.624576	0.778997	no	glp1ncl1 / glp1	Proteomics	C50F4.1
WBGene00008238	-0.259238	0.300409	0.510378	no	glp1ncl1 / glp1	Proteomics	C50F4.16
WBGene00008254	0.862057	0.0579993	0.176309	no	glp1ncl1 / glp1	Proteomics	C51E3.9
WBGene00008258	0.213426	0.678267	0.819506	no	glp1ncl1 / glp1	Proteomics	mans-2
WBGene00008260	-0.0837396	0.397103	0.604166	no	glp1ncl1 / glp1	Proteomics	C52G5.2
WBGene00008262	-0.316768	0.000855202	0.00774504	yes	glp1ncl1 / glp1	Proteomics	ril-1
WBGene00008284	-0.177645	0.691542	0.829633	no	glp1ncl1 / glp1	Proteomics	C53D6.7
WBGene00008311	-0.0347861	0.666925	0.812232	no	glp1ncl1 / glp1	Proteomics	C54G4.7,rskn-2
WBGene00008333	0.0824733	0.516487	0.702744	no	glp1ncl1 / glp1	Proteomics	C55A6.4
WBGene00008334	0.106757	0.605536	0.766527	no	glp1ncl1 / glp1	Proteomics	sdz-8
WBGene00008336	0.329027	0.713837	0.842472	no	glp1ncl1 / glp1	Proteomics	C55A6.7
WBGene00008341	-0.530213	0.000164229	0.00213288	yes	glp1ncl1 / glp1	Proteomics	ttr-44
WBGene00008344	1.14065	0.00369512	0.0236922	yes	glp1ncl1 / glp1	Proteomics	C56A3.5
WBGene00008354	-0.0729447	0.508814	0.696993	no	glp1ncl1 / glp1	Proteomics	gcsh-1
WBGene00008362	0.666558	0.332464	0.539437	no	glp1ncl1 / glp1	Proteomics	D1046.18,cfim-2
WBGene00008371	-0.305047	0.322349	0.529498	no	glp1ncl1 / glp1	Proteomics	D1054.3
WBGene00008375	-0.158216	0.512976	0.700807	no	glp1ncl1 / glp1	Proteomics	D1054.8
WBGene00008377	-0.415043	0.00244372	0.0170285	yes	glp1ncl1 / glp1	Proteomics	D1054.10
WBGene00008378	-0.62705	0.0041544	0.0258759	yes	glp1ncl1 / glp1	Proteomics	D1054.11
WBGene00008385	-0.750646	0.0139944	0.0618998	no	glp1ncl1 / glp1	Proteomics	D1081.7
WBGene00008386	0.383467	0.300903	0.510765	no	glp1ncl1 / glp1	Proteomics	cdc-5L
WBGene00008390	-0.724305	9.9934e-05	0.00145237	yes	glp1ncl1 / glp1	Proteomics	D1086.3
WBGene00008393	-0.527378	2.81006e-07	1.03329e-05	yes	glp1ncl1 / glp1	Proteomics	D1086.6
WBGene00008394	-0.473631	0.000610126	0.00591144	yes	glp1ncl1 / glp1	Proteomics	D1086.7
WBGene00008398	0.020966	0.842706	0.909963	no	glp1ncl1 / glp1	Proteomics	D2005.3
WBGene00008402	0.5768	0.100293	0.255119	no	glp1ncl1 / glp1	Proteomics	wdfy-2
WBGene00008405	0.463055	0.0606781	0.182447	no	glp1ncl1 / glp1	Proteomics	ttll-12
WBGene00008409	0.226191	0.0231128	0.0903205	no	glp1ncl1 / glp1	Proteomics	mpst-1
WBGene00008412	0.0676436	0.336598	0.543349	no	glp1ncl1 / glp1	Proteomics	D2030.2
WBGene00008414	-0.0279888	0.763705	0.868856	no	glp1ncl1 / glp1	Proteomics	D2030.4
WBGene00008415	-0.0130918	0.889464	0.933509	no	glp1ncl1 / glp1	Proteomics	mce-1
WBGene00008422	0.0287188	0.761202	0.868482	no	glp1ncl1 / glp1	Proteomics	D2045.2
WBGene00008428	0.344884	0.213635	0.416051	no	glp1ncl1 / glp1	Proteomics	D2085.3
WBGene00008435	0.702098	0.0623731	0.185479	no	glp1ncl1 / glp1	Proteomics	glna-2
WBGene00008444	-0.260865	0.00570112	0.0325275	yes	glp1ncl1 / glp1	Proteomics	tbc-14
WBGene00008448	-0.0313381	0.870036	0.921804	no	glp1ncl1 / glp1	Proteomics	E01G4.6
WBGene00008452	0.431675	5.54802e-05	0.000877334	yes	glp1ncl1 / glp1	Proteomics	mrps-5
WBGene00008457	-0.194665	0.319164	0.526534	no	glp1ncl1 / glp1	Proteomics	E02H1.5
WBGene00008458	0.605123	0.000216339	0.00267315	yes	glp1ncl1 / glp1	Proteomics	E02H1.6
WBGene00008459	0.176991	0.0478833	0.153671	no	glp1ncl1 / glp1	Proteomics	mrpl-53
WBGene00008480	-0.0658797	0.383453	0.590761	no	glp1ncl1 / glp1	Proteomics	E04D5.1
WBGene00008499	-0.227774	0.132313	0.303624	no	glp1ncl1 / glp1	Proteomics	cyp-37A1
WBGene00008503	-0.494929	0.282457	0.494299	no	glp1ncl1 / glp1	Proteomics	F01G4.4
WBGene00008505	-0.215641	0.203595	0.40454	no	glp1ncl1 / glp1	Proteomics	F01G4.5,F01G4.6
WBGene00008506	-0.170259	0.00865479	0.0440277	yes	glp1ncl1 / glp1	Proteomics	tkt-1
WBGene00008514	-0.119964	0.0066021	0.0362108	yes	glp1ncl1 / glp1	Proteomics	F02A9.4
WBGene00008521	-0.645882	0.122248	0.28945	no	glp1ncl1 / glp1	Proteomics	F02D8.4
WBGene00008528	0.393341	0.0320835	0.114793	no	glp1ncl1 / glp1	Proteomics	F02E9.1
WBGene00008532	-0.0436591	0.495489	0.686687	no	glp1ncl1 / glp1	Proteomics	dpt-1
WBGene00008546	-0.132195	0.288645	0.500821	no	glp1ncl1 / glp1	Proteomics	gfat-1
WBGene00008547	0.202788	0.119486	0.285346	no	glp1ncl1 / glp1	Proteomics	F07A11.4
WBGene00008548	-0.250864	0.00801124	0.041997	yes	glp1ncl1 / glp1	Proteomics	F07A11.5
WBGene00008564	-0.189313	0.0370468	0.128049	no	glp1ncl1 / glp1	Proteomics	acox-1
WBGene00008565	-0.539407	0.00270085	0.0184821	yes	glp1ncl1 / glp1	Proteomics	acox-2
WBGene00008572	0.394704	0.0066591	0.0363691	yes	glp1ncl1 / glp1	Proteomics	F08B12.4
WBGene00008607	-0.236046	0.0106172	0.0510297	no	glp1ncl1 / glp1	Proteomics	F09B12.3
WBGene00008624	-0.611943	0.0862498	0.231353	no	glp1ncl1 / glp1	Proteomics	F09E8.2
WBGene00008628	-0.152723	0.749912	0.863346	no	glp1ncl1 / glp1	Proteomics	srx-134,ttr-21
WBGene00008654	-0.231777	0.0166862	0.070633	no	glp1ncl1 / glp1	Proteomics	F10F2.2
WBGene00008664	-0.0258809	0.725684	0.850149	no	glp1ncl1 / glp1	Proteomics	F10G8.9,ercc-1,nubp-1
WBGene00008669	-0.195214	0.00279127	0.0190155	yes	glp1ncl1 / glp1	Proteomics	acs-14
WBGene00008670	-0.0318879	0.795396	0.886429	no	glp1ncl1 / glp1	Proteomics	F11A3.2
WBGene00008683	-0.513097	0.326245	0.533211	no	glp1ncl1 / glp1	Proteomics	repo-1
WBGene00008688	1.47652	0.000137816	0.0018448	yes	glp1ncl1 / glp1	Proteomics	F11A10.7
WBGene00008694	-0.13235	0.201811	0.402042	no	glp1ncl1 / glp1	Proteomics	F11C1.5
WBGene00008722	0.0895498	0.849524	0.913582	no	glp1ncl1 / glp1	Proteomics	F12F6.7
WBGene00008724	-0.758857	0.0516871	0.162628	no	glp1ncl1 / glp1	Proteomics	F13A7.1
WBGene00008740	-0.278244	0.317091	0.525429	no	glp1ncl1 / glp1	Proteomics	F13D12.5
WBGene00008741	-0.890846	2.15731e-08	1.17573e-06	yes	glp1ncl1 / glp1	Proteomics	F13D12.6
WBGene00008745	-0.159421	0.0613223	0.183486	no	glp1ncl1 / glp1	Proteomics	F13E6.1
WBGene00008764	-0.339524	0.596689	0.759106	no	glp1ncl1 / glp1	Proteomics	dylt-1
WBGene00008765	-0.163379	0.0645476	0.18997	no	glp1ncl1 / glp1	Proteomics	ttx-7
WBGene00008768	-0.114461	0.489062	0.681185	no	glp1ncl1 / glp1	Proteomics	F13G3.10
WBGene00008769	0.826994	0.0999812	0.255119	no	glp1ncl1 / glp1	Proteomics	mrpl-13
WBGene00008781	1.07336	0.000339941	0.00374549	yes	glp1ncl1 / glp1	Proteomics	rpoa-2
WBGene00008800	-0.230974	0.0946399	0.245827	no	glp1ncl1 / glp1	Proteomics	F14E5.2
WBGene00008852	-0.0950159	0.153365	0.338936	no	glp1ncl1 / glp1	Proteomics	ubql-1
WBGene00008857	-0.0836069	0.314247	0.52266	no	glp1ncl1 / glp1	Proteomics	timm-23
WBGene00008860	-0.104119	0.515517	0.701766	no	glp1ncl1 / glp1	Proteomics	rmo-1
WBGene00008865	-0.263748	0.00147903	0.011486	yes	glp1ncl1 / glp1	Proteomics	F15G9.1
WBGene00008919	0.00895957	0.978112	0.986516	no	glp1ncl1 / glp1	Proteomics	vps-36
WBGene00008920	0.138414	0.1019	0.257664	no	glp1ncl1 / glp1	Proteomics	eef-1G
WBGene00008934	0.144413	0.732535	0.854776	no	glp1ncl1 / glp1	Proteomics	F18C12.3
WBGene00008948	-0.101595	0.84282	0.909963	no	glp1ncl1 / glp1	Proteomics	F19B6.1,ufd-1
WBGene00008967	1.87658	0.00268108	0.018388	yes	glp1ncl1 / glp1	Proteomics	F20B10.3
WBGene00008975	-0.128863	0.161098	0.348209	no	glp1ncl1 / glp1	Proteomics	F20D1.3
WBGene00008979	-0.182476	0.0133327	0.0597524	no	glp1ncl1 / glp1	Proteomics	F20D1.9
WBGene00008986	0.0373075	0.737104	0.856717	no	glp1ncl1 / glp1	Proteomics	F20G2.2
WBGene00009002	-0.124858	0.314182	0.52266	no	glp1ncl1 / glp1	Proteomics	hint-1
WBGene00009004	0.0859384	0.251367	0.461874	no	glp1ncl1 / glp1	Proteomics	pfd-6
WBGene00009006	-0.0896781	0.659307	0.80827	no	glp1ncl1 / glp1	Proteomics	F21D5.1
WBGene00009008	-0.156826	0.488453	0.680712	no	glp1ncl1 / glp1	Proteomics	F21D5.3
WBGene00009009	0.120239	0.732728	0.854776	no	glp1ncl1 / glp1	Proteomics	F21D5.4
WBGene00009010	-0.490259	0.177281	0.368822	no	glp1ncl1 / glp1	Proteomics	F21D5.5
WBGene00009012	0.051309	0.537657	0.717644	no	glp1ncl1 / glp1	Proteomics	F21D5.6,F21D5.7
WBGene00009013	0.279989	0.000368582	0.00397495	yes	glp1ncl1 / glp1	Proteomics	mrps-33
WBGene00009031	0.0914098	0.868862	0.921392	no	glp1ncl1 / glp1	Proteomics	F21H7.5
WBGene00009035	-0.565657	0.220881	0.425956	no	glp1ncl1 / glp1	Proteomics	gfat-2
WBGene00009051	-0.0235158	0.790179	0.883301	no	glp1ncl1 / glp1	Proteomics	nduf-6
WBGene00009081	-0.305654	0.00102077	0.00882547	yes	glp1ncl1 / glp1	Proteomics	F23B12.4
WBGene00009082	-0.0856378	0.114963	0.27913	no	glp1ncl1 / glp1	Proteomics	dlat-1
WBGene00009084	1.14677	0.000885843	0.00795175	yes	glp1ncl1 / glp1	Proteomics	F23B12.7
WBGene00009092	-0.0385668	0.594026	0.756925	no	glp1ncl1 / glp1	Proteomics	tomm-20
WBGene00009113	0.0379141	0.794988	0.886429	no	glp1ncl1 / glp1	Proteomics	maph-1.2
WBGene00009118	-0.184573	0.139086	0.316548	no	glp1ncl1 / glp1	Proteomics	F25H2.4
WBGene00009119	0.0534477	0.524851	0.708969	no	glp1ncl1 / glp1	Proteomics	ndk-1
WBGene00009122	-0.0666717	0.25701	0.466623	no	glp1ncl1 / glp1	Proteomics	tct-1
WBGene00009126	-0.322513	0.000585267	0.00572554	yes	glp1ncl1 / glp1	Proteomics	pyk-1
WBGene00009128	0.333171	0.00286892	0.0193716	yes	glp1ncl1 / glp1	Proteomics	mrpl-54
WBGene00009131	0.00246367	0.991748	0.994681	no	glp1ncl1 / glp1	Proteomics	F25H8.1
WBGene00009139	-0.736076	0.311214	0.520737	no	glp1ncl1 / glp1	Proteomics	F25H9.7
WBGene00009158	-1.35222	0.0660641	0.192945	no	glp1ncl1 / glp1	Proteomics	F26E4.3
WBGene00009161	-0.0991542	0.163457	0.351566	no	glp1ncl1 / glp1	Proteomics	F26E4.6
WBGene00009177	-0.194355	0.0413554	0.138548	no	glp1ncl1 / glp1	Proteomics	F26H9.5
WBGene00009187	-0.0500975	0.381607	0.588838	no	glp1ncl1 / glp1	Proteomics	F27D4.1
WBGene00009189	0.192881	0.0258002	0.0981216	no	glp1ncl1 / glp1	Proteomics	F27D4.4
WBGene00009207	0.129183	0.43205	0.632733	no	glp1ncl1 / glp1	Proteomics	F28C6.8
WBGene00009211	1.25293	2.07273e-05	0.000408128	yes	glp1ncl1 / glp1	Proteomics	wdr-46
WBGene00009215	0.225358	0.318002	0.525507	no	glp1ncl1 / glp1	Proteomics	thn-2
WBGene00009237	-0.488323	0.0791164	0.218519	no	glp1ncl1 / glp1	Proteomics	F28H7.3
WBGene00009243	-0.262727	0.160812	0.348158	no	glp1ncl1 / glp1	Proteomics	F29C6.1
WBGene00009246	0.287243	0.000234039	0.00282553	yes	glp1ncl1 / glp1	Proteomics	gfm-1
WBGene00009259	-0.23621	0.00553523	0.0319559	yes	glp1ncl1 / glp1	Proteomics	hpo-34
WBGene00009267	-0.649877	0.0753607	0.211598	no	glp1ncl1 / glp1	Proteomics	usp-48
WBGene00009287	-0.0834384	0.833328	0.905301	no	glp1ncl1 / glp1	Proteomics	psf-2
WBGene00009294	0.83212	0.386204	0.593501	no	glp1ncl1 / glp1	Proteomics	F31D4.9
WBGene00009306	0.0939901	0.15675	0.342949	no	glp1ncl1 / glp1	Proteomics	maph-1.1
WBGene00009307	-0.223962	0.045515	0.14841	no	glp1ncl1 / glp1	Proteomics	F32A11.1
WBGene00009319	-0.168294	0.00230913	0.0163895	yes	glp1ncl1 / glp1	Proteomics	mccc-1
WBGene00009334	0.0377563	0.946196	0.967109	no	glp1ncl1 / glp1	Proteomics	F32D8.11,F32D8.12
WBGene00009340	-0.273321	0.0615331	0.183936	no	glp1ncl1 / glp1	Proteomics	best-14
WBGene00009342	-0.257589	0.000258425	0.00302189	yes	glp1ncl1 / glp1	Proteomics	fasn-1
WBGene00009344	-0.648613	0.272769	0.483929	no	glp1ncl1 / glp1	Proteomics	F32H2.7
WBGene00009352	-0.138608	0.799521	0.888939	no	glp1ncl1 / glp1	Proteomics	F33A8.4,col-83
WBGene00009367	0.578507	0.0303148	0.110318	no	glp1ncl1 / glp1	Proteomics	F33H2.3
WBGene00009369	0.068199	0.473058	0.669317	no	glp1ncl1 / glp1	Proteomics	F33H2.6
WBGene00009386	-0.171768	0.283604	0.494867	no	glp1ncl1 / glp1	Proteomics	tag-290
WBGene00009394	-0.326819	0.0592591	0.179246	no	glp1ncl1 / glp1	Proteomics	clec-63
WBGene00009396	-0.897329	0.000334214	0.00369573	yes	glp1ncl1 / glp1	Proteomics	clec-65
WBGene00009434	-0.400038	0.147667	0.330169	no	glp1ncl1 / glp1	Proteomics	F35E12.10
WBGene00009436	-0.122368	0.288928	0.500919	no	glp1ncl1 / glp1	Proteomics	marb-1
WBGene00009440	0.033583	0.656344	0.806426	no	glp1ncl1 / glp1	Proteomics	idhg-1
WBGene00009445	-0.0141882	0.896761	0.937621	no	glp1ncl1 / glp1	Proteomics	F35G12.12
WBGene00009450	-0.464627	0.346422	0.55297	no	glp1ncl1 / glp1	Proteomics	ugt-58
WBGene00009453	-0.586028	0.15797	0.344104	no	glp1ncl1 / glp1	Proteomics	F36A2.3
WBGene00009454	0.166058	0.221352	0.425956	no	glp1ncl1 / glp1	Proteomics	F36A2.7
WBGene00009457	0.178225	0.888431	0.932745	no	glp1ncl1 / glp1	Proteomics	F36A2.10
WBGene00009459	0.195819	0.739456	0.857436	no	glp1ncl1 / glp1	Proteomics	F36A2.12
WBGene00009478	-0.0853648	0.545688	0.72222	no	glp1ncl1 / glp1	Proteomics	syx-7
WBGene00009483	0.165591	0.620276	0.776808	no	glp1ncl1 / glp1	Proteomics	F36G3.2
WBGene00009514	-0.11664	0.129608	0.299442	no	glp1ncl1 / glp1	Proteomics	F37H8.5
WBGene00009521	-0.0261383	0.614884	0.772592	no	glp1ncl1 / glp1	Proteomics	F38A1.8
WBGene00009531	0.266455	0.00221797	0.0158703	yes	glp1ncl1 / glp1	Proteomics	F38B2.4
WBGene00009542	0.046859	0.521792	0.706839	no	glp1ncl1 / glp1	Proteomics	copb-2
WBGene00009554	-0.313936	0.549766	0.724475	no	glp1ncl1 / glp1	Proteomics	F39B2.3
WBGene00009563	0.0741212	0.300508	0.510378	no	glp1ncl1 / glp1	Proteomics	F39H2.3
WBGene00009575	0.268591	0.0103038	0.0498371	yes	glp1ncl1 / glp1	Proteomics	F40F8.1
WBGene00009578	-0.18399	0.0710933	0.203543	no	glp1ncl1 / glp1	Proteomics	F40F8.5
WBGene00009583	-0.0518302	0.352793	0.560368	no	glp1ncl1 / glp1	Proteomics	aagr-3
WBGene00009595	-0.28383	0.0105519	0.0508756	no	glp1ncl1 / glp1	Proteomics	F40F12.7
WBGene00009620	0.0868635	0.439899	0.63993	no	glp1ncl1 / glp1	Proteomics	fip-5
WBGene00009621	0.0739413	0.329088	0.53624	no	glp1ncl1 / glp1	Proteomics	fipr-21
WBGene00009626	-0.172038	0.104144	0.261212	no	glp1ncl1 / glp1	Proteomics	F42A8.1
WBGene00009636	-0.423203	0.0643274	0.189505	no	glp1ncl1 / glp1	Proteomics	F42F12.4
WBGene00009645	-0.234764	0.507763	0.696179	no	glp1ncl1 / glp1	Proteomics	F42G10.1
WBGene00009654	-0.0961124	0.22259	0.426725	no	glp1ncl1 / glp1	Proteomics	F43D9.3
WBGene00009663	-0.306044	0.051921	0.163028	no	glp1ncl1 / glp1	Proteomics	hda-5
WBGene00009664	-0.0817441	0.220002	0.425235	no	glp1ncl1 / glp1	Proteomics	idha-1
WBGene00009668	0.348113	0.0214195	0.0855657	no	glp1ncl1 / glp1	Proteomics	cfim-1
WBGene00009674	-0.0733396	0.370433	0.577701	no	glp1ncl1 / glp1	Proteomics	nucb-1
WBGene00009688	-0.454904	0.000373602	0.00400113	yes	glp1ncl1 / glp1	Proteomics	F44E5.1
WBGene00009691	0.0680923	0.520317	0.705468	no	glp1ncl1 / glp1	Proteomics	F44E5.4
WBGene00009712	0.238394	0.0093418	0.0465869	yes	glp1ncl1 / glp1	Proteomics	F44G4.2
WBGene00009732	-0.0672431	0.374516	0.581099	no	glp1ncl1 / glp1	Proteomics	cope-1,exo-1
WBGene00009734	-0.0882712	0.222304	0.426725	no	glp1ncl1 / glp1	Proteomics	F45G2.8
WBGene00009739	-0.168215	0.108977	0.268659	no	glp1ncl1 / glp1	Proteomics	F45H10.2
WBGene00009740	0.0249149	0.689712	0.82848	no	glp1ncl1 / glp1	Proteomics	F45H10.3
WBGene00009744	0.394018	0.404243	0.60956	no	glp1ncl1 / glp1	Proteomics	hpo-35
WBGene00009772	0.159783	0.0656972	0.192221	no	glp1ncl1 / glp1	Proteomics	ztf-7
WBGene00009776	-0.116737	0.427381	0.628881	no	glp1ncl1 / glp1	Proteomics	F46B6.12
WBGene00009783	-0.203404	0.577952	0.744452	no	glp1ncl1 / glp1	Proteomics	rer-1
WBGene00009784	0.274948	0.22874	0.432269	no	glp1ncl1 / glp1	Proteomics	F46C5.9
WBGene00009796	-0.578701	3.2839e-06	8.79164e-05	yes	glp1ncl1 / glp1	Proteomics	F46G10.1
WBGene00009812	-0.0863126	0.203836	0.404755	no	glp1ncl1 / glp1	Proteomics	suca-1
WBGene00009813	0.0568277	0.5167	0.702744	no	glp1ncl1 / glp1	Proteomics	haly-1
WBGene00009818	-0.235113	0.0695823	0.200345	no	glp1ncl1 / glp1	Proteomics	acbp-3
WBGene00009829	-0.127986	0.0832132	0.225947	no	glp1ncl1 / glp1	Proteomics	F47G9.1
WBGene00009880	0.0145732	0.858457	0.918013	no	glp1ncl1 / glp1	Proteomics	F49C12.11
WBGene00009886	-0.201579	0.0415176	0.138786	no	glp1ncl1 / glp1	Proteomics	F49E2.2
WBGene00009888	0.0128398	0.806771	0.893075	no	glp1ncl1 / glp1	Proteomics	F49E2.5
WBGene00009895	0.355165	0.601052	0.762749	no	glp1ncl1 / glp1	Proteomics	scl-2
WBGene00009897	-0.333185	0.0798147	0.220049	no	glp1ncl1 / glp1	Proteomics	skpo-1
WBGene00009898	-0.386672	0.0198419	0.0809593	no	glp1ncl1 / glp1	Proteomics	dod-23
WBGene00009915	-0.17359	0.10658	0.264979	no	glp1ncl1 / glp1	Proteomics	F52A8.1
WBGene00009918	-0.25311	0.00151355	0.0116357	yes	glp1ncl1 / glp1	Proteomics	F52A8.5
WBGene00009920	0.0325272	0.733186	0.854776	no	glp1ncl1 / glp1	Proteomics	abts-1
WBGene00009921	-1.30303	0.0129697	0.0583065	no	glp1ncl1 / glp1	Proteomics	F52B5.2
WBGene00009925	-0.115052	0.334347	0.541054	no	glp1ncl1 / glp1	Proteomics	F52B11.2
WBGene00009940	-0.181098	0.229431	0.43277	no	glp1ncl1 / glp1	Proteomics	F52F12.9,strl-1
WBGene00009947	-0.809802	0.363887	0.570701	no	glp1ncl1 / glp1	Proteomics	F52H3.5
WBGene00009952	-0.252191	4.18201e-05	0.000700388	yes	glp1ncl1 / glp1	Proteomics	acaa-2
WBGene00009959	0.646698	0.157551	0.344104	no	glp1ncl1 / glp1	Proteomics	F53B6.4
WBGene00009973	-0.207373	0.0239216	0.0928863	no	glp1ncl1 / glp1	Proteomics	F53C11.3
WBGene00009980	0.060794	0.608846	0.768979	no	glp1ncl1 / glp1	Proteomics	F53F1.2
WBGene00009981	0.241566	0.0805185	0.221589	no	glp1ncl1 / glp1	Proteomics	F53F1.3
WBGene00009987	0.0326241	0.620012	0.776796	no	glp1ncl1 / glp1	Proteomics	tbcb-1
WBGene00009992	0.0187178	0.779127	0.877363	no	glp1ncl1 / glp1	Proteomics	F53F4.10
WBGene00009993	1.29811	2.24478e-10	2.07608e-08	yes	glp1ncl1 / glp1	Proteomics	F53F4.11
WBGene00009995	1.26839	0.0413532	0.138548	no	glp1ncl1 / glp1	Proteomics	F53F4.13
WBGene00010002	0.178737	0.27214	0.483929	no	glp1ncl1 / glp1	Proteomics	F53F8.5
WBGene00010007	-0.620565	0.0954686	0.247553	no	glp1ncl1 / glp1	Proteomics	F53H4.2
WBGene00010015	0.217964	0.00483769	0.0289502	yes	glp1ncl1 / glp1	Proteomics	atad-3
WBGene00010035	0.120908	0.818945	0.89839	no	glp1ncl1 / glp1	Proteomics	F54C8.1
WBGene00010040	-0.390001	8.70473e-05	0.0013079	yes	glp1ncl1 / glp1	Proteomics	F54C8.7
WBGene00010041	-0.103478	0.308534	0.51886	no	glp1ncl1 / glp1	Proteomics	F54C9.3
WBGene00010044	2.42795	1.02461e-08	6.13161e-07	yes	glp1ncl1 / glp1	Proteomics	F54C9.9
WBGene00010050	-0.53606	0.276084	0.485934	no	glp1ncl1 / glp1	Proteomics	F54D5.4
WBGene00010052	-0.167848	0.0494929	0.157182	no	glp1ncl1 / glp1	Proteomics	F54D5.7
WBGene00010055	-0.283415	0.000103734	0.0014716	yes	glp1ncl1 / glp1	Proteomics	F54D5.12
WBGene00010063	1.22027	0.0559769	0.171528	no	glp1ncl1 / glp1	Proteomics	dhrs-4
WBGene00010065	-0.564478	0.00135848	0.0109108	yes	glp1ncl1 / glp1	Proteomics	F54F7.3
WBGene00010070	-0.0843805	0.188525	0.386007	no	glp1ncl1 / glp1	Proteomics	nep-17
WBGene00010075	0.17392	0.693077	0.829844	no	glp1ncl1 / glp1	Proteomics	F55A11.1
WBGene00010083	0.0638951	0.457801	0.654737	no	glp1ncl1 / glp1	Proteomics	F55B11.1
WBGene00010084	-0.60284	0.000237268	0.00282868	yes	glp1ncl1 / glp1	Proteomics	F55B11.2
WBGene00010085	-0.362404	0.057498	0.175134	no	glp1ncl1 / glp1	Proteomics	F55B11.3
WBGene00010086	-0.600491	0.0545581	0.169111	no	glp1ncl1 / glp1	Proteomics	F55B11.4
WBGene00010091	0.721915	0.0663081	0.193465	no	glp1ncl1 / glp1	Proteomics	ssp-35
WBGene00010094	0.0161397	0.854383	0.916225	no	glp1ncl1 / glp1	Proteomics	tsfm-1
WBGene00010097	-0.0231219	0.639827	0.793157	no	glp1ncl1 / glp1	Proteomics	srpa-68
WBGene00010117	-0.383473	0.000387801	0.00413835	yes	glp1ncl1 / glp1	Proteomics	nkb-3
WBGene00010123	-0.296074	0.432602	0.633238	no	glp1ncl1 / glp1	Proteomics	F55G11.2
WBGene00010124	0.384644	0.190279	0.388709	no	glp1ncl1 / glp1	Proteomics	F55G11.4
WBGene00010130	-0.20137	0.0197634	0.0807467	no	glp1ncl1 / glp1	Proteomics	vha-14
WBGene00010135	-0.00719342	0.926737	0.955262	no	glp1ncl1 / glp1	Proteomics	F55H12.4
WBGene00010139	-0.136225	0.304628	0.514229	no	glp1ncl1 / glp1	Proteomics	F56A8.3
WBGene00010150	-0.0509695	0.664288	0.81039	no	glp1ncl1 / glp1	Proteomics	F56D5.6
WBGene00010196	-1.47844	0.0310969	0.112317	no	glp1ncl1 / glp1	Proteomics	F57C2.4
WBGene00010197	-0.352443	0.00249874	0.0173322	yes	glp1ncl1 / glp1	Proteomics	F57C2.5
WBGene00010204	-0.534448	6.73688e-08	3.00951e-06	yes	glp1ncl1 / glp1	Proteomics	F57F5.1
WBGene00010225	-0.0301348	0.787726	0.882219	no	glp1ncl1 / glp1	Proteomics	ttr-31
WBGene00010230	1.34803	4.71257e-10	3.99521e-08	yes	glp1ncl1 / glp1	Proteomics	rpac-19
WBGene00010231	2.53698	1.0691e-05	0.00024719	yes	glp1ncl1 / glp1	Proteomics	F58B3.4
WBGene00010238	-0.470436	0.225684	0.429267	no	glp1ncl1 / glp1	Proteomics	F58B4.5
WBGene00010260	0.447256	1.81156e-05	0.000378691	yes	glp1ncl1 / glp1	Proteomics	ddx-17
WBGene00010263	0.295984	0.40334	0.608499	no	glp1ncl1 / glp1	Proteomics	wago-4
WBGene00010266	0.160237	0.0464286	0.150905	no	glp1ncl1 / glp1	Proteomics	dct-18
WBGene00010272	-0.241438	0.0847169	0.228288	no	glp1ncl1 / glp1	Proteomics	amph-1
WBGene00010279	-0.301403	0.000529473	0.00528089	yes	glp1ncl1 / glp1	Proteomics	letm-1
WBGene00010280	0.086909	0.250576	0.461139	no	glp1ncl1 / glp1	Proteomics	rde-12
WBGene00010284	-0.179	0.57704	0.744044	no	glp1ncl1 / glp1	Proteomics	aman-2
WBGene00010286	-0.247813	0.0125229	0.0572154	no	glp1ncl1 / glp1	Proteomics	F58H1.3
WBGene00010302	-0.132578	0.413433	0.617923	no	glp1ncl1 / glp1	Proteomics	F59A2.2
WBGene00010303	0.0068065	0.947634	0.967765	no	glp1ncl1 / glp1	Proteomics	cri-3
WBGene00010304	0.804917	0.018563	0.0768716	no	glp1ncl1 / glp1	Proteomics	clpf-1
WBGene00010306	-0.0235744	0.810857	0.893672	no	glp1ncl1 / glp1	Proteomics	golg-4
WBGene00010307	0.607628	0.428595	0.628881	no	glp1ncl1 / glp1	Proteomics	F59B2.3,skat-1
WBGene00010308	-0.766417	0.0774036	0.215347	no	glp1ncl1 / glp1	Proteomics	F59B2.3,skat-1
WBGene00010317	-0.0194376	0.769594	0.872188	no	glp1ncl1 / glp1	Proteomics	idh-1
WBGene00010326	-0.0666532	0.355914	0.562533	no	glp1ncl1 / glp1	Proteomics	F59C6.5
WBGene00010333	-0.322662	0.555366	0.727412	no	glp1ncl1 / glp1	Proteomics	copz-1
WBGene00010339	-0.0467984	0.73499	0.855226	no	glp1ncl1 / glp1	Proteomics	acl-1
WBGene00010351	-0.156258	0.738634	0.856989	no	glp1ncl1 / glp1	Proteomics	cbd-1
WBGene00010357	-0.0932975	0.195404	0.394167	no	glp1ncl1 / glp1	Proteomics	H03A11.2
WBGene00010370	0.37328	0.458518	0.655385	no	glp1ncl1 / glp1	Proteomics	ctg-1
WBGene00010383	-0.23025	0.00149408	0.0115441	yes	glp1ncl1 / glp1	Proteomics	mpst-3
WBGene00010397	0.0792874	0.868374	0.921392	no	glp1ncl1 / glp1	Proteomics	suox-1
WBGene00010405	-0.0233543	0.77159	0.872363	no	glp1ncl1 / glp1	Proteomics	erfa-3
WBGene00010406	-0.161042	0.0646816	0.19002	no	glp1ncl1 / glp1	Proteomics	math-33
WBGene00010416	-0.17856	0.0116554	0.054908	no	glp1ncl1 / glp1	Proteomics	hxk-2
WBGene00010418	-0.102512	0.860163	0.918296	no	glp1ncl1 / glp1	Proteomics	H27A22.1
WBGene00010419	-0.0772902	0.120112	0.286393	no	glp1ncl1 / glp1	Proteomics	H28O16.1
WBGene00010425	0.00603134	0.958062	0.973006	no	glp1ncl1 / glp1	Proteomics	lpin-1
WBGene00010435	1.84642	0.000183782	0.00235674	yes	glp1ncl1 / glp1	Proteomics	JC8.2
WBGene00010440	-0.0932671	0.313206	0.522067	no	glp1ncl1 / glp1	Proteomics	ttr-51
WBGene00010456	-0.375964	3.94898e-05	0.000673311	yes	glp1ncl1 / glp1	Proteomics	K01C8.1
WBGene00010466	0.0944355	0.764115	0.868856	no	glp1ncl1 / glp1	Proteomics	K01D12.7
WBGene00010471	-0.31163	0.474562	0.669317	no	glp1ncl1 / glp1	Proteomics	cdr-6
WBGene00010478	1.15897	6.40408e-11	8.25973e-09	yes	glp1ncl1 / glp1	Proteomics	K01G5.5
WBGene00010480	-0.182698	0.75062	0.863836	no	glp1ncl1 / glp1	Proteomics	K01G5.9
WBGene00010496	-0.178103	0.34558	0.552493	no	glp1ncl1 / glp1	Proteomics	sec-12
WBGene00010500	-0.0778456	0.366448	0.573833	no	glp1ncl1 / glp1	Proteomics	K02B12.7
WBGene00010502	0.389126	0.367618	0.575074	no	glp1ncl1 / glp1	Proteomics	K02C4.3
WBGene00010538	-0.117036	0.526958	0.709429	no	glp1ncl1 / glp1	Proteomics	ttr-3
WBGene00010539	-0.155755	0.117813	0.282232	no	glp1ncl1 / glp1	Proteomics	ttr-2
WBGene00010556	-0.184624	0.237574	0.442467	no	glp1ncl1 / glp1	Proteomics	mspn-1,rack-1
WBGene00010560	0.208524	0.0443675	0.145445	no	glp1ncl1 / glp1	Proteomics	iftb-1
WBGene00010564	-0.177643	0.05446	0.169086	no	glp1ncl1 / glp1	Proteomics	ath-1
WBGene00010582	2.03908	4.60566e-08	2.26717e-06	yes	glp1ncl1 / glp1	Proteomics	K05C4.5
WBGene00010593	0.237438	0.0137545	0.0611265	no	glp1ncl1 / glp1	Proteomics	gsnl-1
WBGene00010595	-0.154968	0.131201	0.302007	no	glp1ncl1 / glp1	Proteomics	haao-1
WBGene00010605	-0.198936	0.0271612	0.101963	no	glp1ncl1 / glp1	Proteomics	K06G5.1
WBGene00010609	-0.191186	0.564585	0.733576	no	glp1ncl1 / glp1	Proteomics	dut-1
WBGene00010616	0.878931	0.402555	0.607915	no	glp1ncl1 / glp1	Proteomics	K07A1.10
WBGene00010620	-0.224144	0.498482	0.689338	no	glp1ncl1 / glp1	Proteomics	K07A12.1
WBGene00010622	0.207613	0.267743	0.480395	no	glp1ncl1 / glp1	Proteomics	K07A12.4
WBGene00010624	0.276489	0.00112331	0.0094445	yes	glp1ncl1 / glp1	Proteomics	mrps-15
WBGene00010625	-0.517567	0.166036	0.354117	no	glp1ncl1 / glp1	Proteomics	K07C5.2
WBGene00010627	1.1732	1.65059e-12	4.19801e-10	yes	glp1ncl1 / glp1	Proteomics	K07C5.4
WBGene00010631	-0.0662663	0.373719	0.580579	no	glp1ncl1 / glp1	Proteomics	cash-1
WBGene00010633	0.731607	0.120029	0.286393	no	glp1ncl1 / glp1	Proteomics	nspd-2
WBGene00010638	0.796228	0.00147201	0.0114606	yes	glp1ncl1 / glp1	Proteomics	K07F5.14
WBGene00010645	-0.182908	0.0269527	0.10138	no	glp1ncl1 / glp1	Proteomics	fecl-1
WBGene00010664	-0.0684412	0.57921	0.744628	no	glp1ncl1 / glp1	Proteomics	dbn-1
WBGene00010665	-0.127953	0.206406	0.408	no	glp1ncl1 / glp1	Proteomics	K08E3.5
WBGene00010677	0.0253035	0.738751	0.856989	no	glp1ncl1 / glp1	Proteomics	gtbp-1
WBGene00010678	-0.790231	0.0654398	0.191856	no	glp1ncl1 / glp1	Proteomics	K08F4.3
WBGene00010685	-0.420171	0.552552	0.725641	no	glp1ncl1 / glp1	Proteomics	aipl-1
WBGene00010713	0.648757	0.0668512	0.19447	no	glp1ncl1 / glp1	Proteomics	uso-1
WBGene00010721	1.53684	0.00892685	0.0450326	yes	glp1ncl1 / glp1	Proteomics	K09E4.3
WBGene00010727	0.0541029	0.66291	0.809833	no	glp1ncl1 / glp1	Proteomics	K09G1.1
WBGene00010730	-0.096943	0.295257	0.506096	no	glp1ncl1 / glp1	Proteomics	ensa-1
WBGene00010732	0.835147	3.88994e-09	2.6982e-07	yes	glp1ncl1 / glp1	Proteomics	K10C3.5
WBGene00010736	-0.0191047	0.827103	0.901864	no	glp1ncl1 / glp1	Proteomics	istr-1
WBGene00010759	-0.102707	0.253698	0.4642	no	glp1ncl1 / glp1	Proteomics	cysl-2
WBGene00010766	0.25883	0.0280173	0.104534	no	glp1ncl1 / glp1	Proteomics	K11B4.1
WBGene00010776	1.65385	0.0111404	0.053043	no	glp1ncl1 / glp1	Proteomics	pix-1
WBGene00010778	-0.18122	0.0935757	0.244014	no	glp1ncl1 / glp1	Proteomics	gpdh-2
WBGene00010780	-0.357633	0.000233536	0.00282553	yes	glp1ncl1 / glp1	Proteomics	K11H3.3
WBGene00010785	1.09621	0.0120532	0.0557367	no	glp1ncl1 / glp1	Proteomics	top-2
WBGene00010790	1.63936	1.4338e-08	7.95629e-07	yes	glp1ncl1 / glp1	Proteomics	sodh-1
WBGene00010793	-0.511613	0.00866588	0.0440277	yes	glp1ncl1 / glp1	Proteomics	LLC1.2
WBGene00010794	-0.00233713	0.962214	0.97539	no	glp1ncl1 / glp1	Proteomics	dld-1
WBGene00010809	-0.0688352	0.517574	0.702998	no	glp1ncl1 / glp1	Proteomics	M01F1.3,rpl-16
WBGene00010812	0.631422	0.021196	0.0848952	no	glp1ncl1 / glp1	Proteomics	mrpl-35
WBGene00010834	-0.0272365	0.811127	0.893672	no	glp1ncl1 / glp1	Proteomics	mct-3
WBGene00010842	-0.148876	0.148745	0.332093	no	glp1ncl1 / glp1	Proteomics	ymel-1
WBGene00010844	-0.15212	0.515408	0.701766	no	glp1ncl1 / glp1	Proteomics	prp-3
WBGene00010847	0.319792	0.224485	0.42802	no	glp1ncl1 / glp1	Proteomics	M04B2.4
WBGene00010858	0.196038	0.623095	0.778127	no	glp1ncl1 / glp1	Proteomics	M04C9.3
WBGene00010875	-0.646829	0.0636738	0.187943	no	glp1ncl1 / glp1	Proteomics	M05D6.2
WBGene00010878	0.674068	0.19119	0.389885	no	glp1ncl1 / glp1	Proteomics	M05D6.5
WBGene00010879	0.0681025	0.529765	0.711325	no	glp1ncl1 / glp1	Proteomics	M05D6.6
WBGene00010896	0.970776	5.88904e-09	3.90725e-07	yes	glp1ncl1 / glp1	Proteomics	M28.5
WBGene00010901	0.743435	0.461289	0.657568	no	glp1ncl1 / glp1	Proteomics	M28.10
WBGene00010904	-0.446325	0.00191232	0.0139627	yes	glp1ncl1 / glp1	Proteomics	ugt-62
WBGene00010905	0.457707	7.57483e-05	0.00116173	yes	glp1ncl1 / glp1	Proteomics	mrps-34
WBGene00010908	-0.148962	0.055709	0.171222	no	glp1ncl1 / glp1	Proteomics	zbp-1
WBGene00010911	-0.368334	0.000608639	0.00591144	yes	glp1ncl1 / glp1	Proteomics	M106.3
WBGene00010912	0.0859795	0.158623	0.344567	no	glp1ncl1 / glp1	Proteomics	gmps-1
WBGene00010922	-0.132472	0.0720345	0.205083	no	glp1ncl1 / glp1	Proteomics	M142.5
WBGene00010924	-0.0766742	0.434625	0.635285	no	glp1ncl1 / glp1	Proteomics	M153.1
WBGene00010941	-0.0726495	0.463665	0.66003	no	glp1ncl1 / glp1	Proteomics	gss-1
WBGene00010942	-0.241373	0.00422905	0.0260749	yes	glp1ncl1 / glp1	Proteomics	chch-3
WBGene00010984	0.159198	0.305826	0.515395	no	glp1ncl1 / glp1	Proteomics	nkat-3
WBGene00010988	0.779687	0.00014985	0.00196285	yes	glp1ncl1 / glp1	Proteomics	metr-1
WBGene00010993	-0.0612471	0.659161	0.80827	no	glp1ncl1 / glp1	Proteomics	vha-20
WBGene00011003	0.261003	0.0636535	0.187943	no	glp1ncl1 / glp1	Proteomics	R04B5.5
WBGene00011006	-0.550954	0.218365	0.422746	no	glp1ncl1 / glp1	Proteomics	ugt-47
WBGene00011015	-0.144752	0.0505408	0.159514	no	glp1ncl1 / glp1	Proteomics	R04F11.2
WBGene00011029	-0.0350036	0.798471	0.888095	no	glp1ncl1 / glp1	Proteomics	abhd-11.2
WBGene00011032	1.49446	0.000118482	0.00163623	yes	glp1ncl1 / glp1	Proteomics	R05D11.4,paxt-1
WBGene00011036	0.267857	0.38802	0.595692	no	glp1ncl1 / glp1	Proteomics	edc-3
WBGene00011038	-0.255071	0.103313	0.260158	no	glp1ncl1 / glp1	Proteomics	R05H5.3
WBGene00011043	2.75666	4.56095e-13	1.66007e-10	yes	glp1ncl1 / glp1	Proteomics	rbm-28
WBGene00011045	-0.249223	0.0267999	0.101229	no	glp1ncl1 / glp1	Proteomics	gpx-2
WBGene00011050	0.366517	0.02975	0.108869	no	glp1ncl1 / glp1	Proteomics	agl-1
WBGene00011059	-0.0889474	0.331863	0.539321	no	glp1ncl1 / glp1	Proteomics	R06C1.4
WBGene00011061	0.341179	0.77217	0.872515	no	glp1ncl1 / glp1	Proteomics	wago-1
WBGene00011064	-0.0726075	0.251077	0.46162	no	glp1ncl1 / glp1	Proteomics	adsl-1
WBGene00011095	-0.214645	0.905976	0.942578	no	glp1ncl1 / glp1	Proteomics	gana-1
WBGene00011110	-0.287251	0.000550034	0.0054327	yes	glp1ncl1 / glp1	Proteomics	prdx-3
WBGene00011116	0.977943	1.94985e-10	1.85967e-08	yes	glp1ncl1 / glp1	Proteomics	pdcd-2
WBGene00011119	-0.350327	0.00802235	0.041997	yes	glp1ncl1 / glp1	Proteomics	R07E5.13
WBGene00011122	-0.229175	8.95489e-05	0.0013203	yes	glp1ncl1 / glp1	Proteomics	cpt-2
WBGene00011123	0.0736375	0.409791	0.613525	no	glp1ncl1 / glp1	Proteomics	nuaf-3,prx-14
WBGene00011124	-0.514669	0.184031	0.380015	no	glp1ncl1 / glp1	Proteomics	sdz-27
WBGene00011128	0.0665245	0.22418	0.427951	no	glp1ncl1 / glp1	Proteomics	R07H5.8
WBGene00011155	0.339434	0.411904	0.616241	no	glp1ncl1 / glp1	Proteomics	R09B3.2
WBGene00011156	0.0169554	0.86738	0.921101	no	glp1ncl1 / glp1	Proteomics	R09B3.3
WBGene00011181	-0.133569	0.757902	0.867311	no	glp1ncl1 / glp1	Proteomics	R09H10.3
WBGene00011182	-0.147353	0.124809	0.292338	no	glp1ncl1 / glp1	Proteomics	R09H10.5
WBGene00011195	0.260907	0.509427	0.697206	no	glp1ncl1 / glp1	Proteomics	R10D12.13,sao-1
WBGene00011214	0.482134	0.191385	0.389885	no	glp1ncl1 / glp1	Proteomics	R10E9.2
WBGene00011222	-0.379541	0.314686	0.523105	no	glp1ncl1 / glp1	Proteomics	R10H10.3
WBGene00011232	0.0369565	0.614624	0.772584	no	glp1ncl1 / glp1	Proteomics	pck-2
WBGene00011239	0.0363719	0.824879	0.901371	no	glp1ncl1 / glp1	Proteomics	pges-2
WBGene00011240	-0.170383	0.291279	0.501968	no	glp1ncl1 / glp1	Proteomics	R11A8.7
WBGene00011247	0.508406	5.26657e-05	0.000837165	yes	glp1ncl1 / glp1	Proteomics	mrpl-49
WBGene00011252	-0.0584201	0.779444	0.877363	no	glp1ncl1 / glp1	Proteomics	R11H6.4
WBGene00011270	-0.0751149	0.506725	0.695993	no	glp1ncl1 / glp1	Proteomics	R31.2
WBGene00011272	-0.130105	0.16873	0.358301	no	glp1ncl1 / glp1	Proteomics	dtmk-1
WBGene00011273	-0.306104	0.00361991	0.0234067	yes	glp1ncl1 / glp1	Proteomics	R53.4
WBGene00011274	-0.103366	0.223069	0.427374	no	glp1ncl1 / glp1	Proteomics	R53.5
WBGene00011289	-0.43773	1.80728e-06	5.35515e-05	yes	glp1ncl1 / glp1	Proteomics	R102.2
WBGene00011291	-0.413314	5.54286e-06	0.000142158	yes	glp1ncl1 / glp1	Proteomics	R102.4
WBGene00011292	0.61593	0.14901	0.332175	no	glp1ncl1 / glp1	Proteomics	R102.5
WBGene00011298	-0.0979516	0.723902	0.849097	no	glp1ncl1 / glp1	Proteomics	R107.2
WBGene00011306	0.417606	0.0570322	0.174236	no	glp1ncl1 / glp1	Proteomics	R186.3
WBGene00011308	0.345868	0.391069	0.597369	no	glp1ncl1 / glp1	Proteomics	R186.7
WBGene00011311	0.943572	0.0558908	0.171436	no	glp1ncl1 / glp1	Proteomics	T01B7.5
WBGene00011330	-0.119983	0.234886	0.43993	no	glp1ncl1 / glp1	Proteomics	T01D3.6
WBGene00011334	0.23823	0.136522	0.311409	no	glp1ncl1 / glp1	Proteomics	mrps-14
WBGene00011338	1.21211	0.0218987	0.0865735	no	glp1ncl1 / glp1	Proteomics	sec-31
WBGene00011353	-0.0879669	0.446241	0.644242	no	glp1ncl1 / glp1	Proteomics	T01H8.2
WBGene00011361	-1.12614	0.166927	0.355272	no	glp1ncl1 / glp1	Proteomics	T01H10.8
WBGene00011374	-0.186454	0.165616	0.353715	no	glp1ncl1 / glp1	Proteomics	T02D1.8
WBGene00011391	0.347192	0.633179	0.787475	no	glp1ncl1 / glp1	Proteomics	mrps-12
WBGene00011393	0.252323	0.00936691	0.0466359	yes	glp1ncl1 / glp1	Proteomics	T03D8.6
WBGene00011398	-0.105458	0.265119	0.477935	no	glp1ncl1 / glp1	Proteomics	qdpr-1
WBGene00011399	0.296791	0.383831	0.590904	no	glp1ncl1 / glp1	Proteomics	T03F6.3
WBGene00011404	-0.369192	0.0461275	0.150087	no	glp1ncl1 / glp1	Proteomics	T03F7.7
WBGene00011407	-0.178008	0.524159	0.708787	no	glp1ncl1 / glp1	Proteomics	ppat-1
WBGene00011408	1.36251	3.76153e-12	7.17512e-10	yes	glp1ncl1 / glp1	Proteomics	T04A8.6
WBGene00011409	-0.100464	0.354586	0.561887	no	glp1ncl1 / glp1	Proteomics	T04A8.7,dnj-18
WBGene00011412	0.754229	0.0174485	0.0733508	no	glp1ncl1 / glp1	Proteomics	mrpl-16
WBGene00011416	-1.21694	2.07236e-12	4.86527e-10	yes	glp1ncl1 / glp1	Proteomics	T04A11.1
WBGene00011436	0.753238	0.265065	0.477935	no	glp1ncl1 / glp1	Proteomics	T04F3.1
WBGene00011439	-0.181094	0.347364	0.553895	no	glp1ncl1 / glp1	Proteomics	T04F3.4
WBGene00011440	-0.278397	0.00906669	0.0455782	yes	glp1ncl1 / glp1	Proteomics	sfxn-1.5
WBGene00011460	-0.243264	0.0239933	0.0930464	no	glp1ncl1 / glp1	Proteomics	ttr-14
WBGene00011474	0.0960568	0.242757	0.450392	no	glp1ncl1 / glp1	Proteomics	aldo-1
WBGene00011480	-0.119356	0.131213	0.302007	no	glp1ncl1 / glp1	Proteomics	enpl-1
WBGene00011488	-0.0436632	0.677611	0.819506	no	glp1ncl1 / glp1	Proteomics	nra-2
WBGene00011501	-0.0120805	0.981776	0.988253	no	glp1ncl1 / glp1	Proteomics	rmd-1
WBGene00011507	0.358341	0.374477	0.581099	no	glp1ncl1 / glp1	Proteomics	T05H10.1
WBGene00011510	-0.0985791	0.104245	0.261212	no	glp1ncl1 / glp1	Proteomics	pdha-1,ufd-2
WBGene00011522	0.120944	0.760616	0.868482	no	glp1ncl1 / glp1	Proteomics	srap-1
WBGene00011527	0.27655	0.00222712	0.0158703	yes	glp1ncl1 / glp1	Proteomics	cchl-1
WBGene00011529	-1.06746	0.00250925	0.0173656	yes	glp1ncl1 / glp1	Proteomics	T06D8.9
WBGene00011538	2.31114	7.17406e-08	3.12789e-06	yes	glp1ncl1 / glp1	Proteomics	T06E6.1
WBGene00011559	-0.0605237	0.451077	0.647825	no	glp1ncl1 / glp1	Proteomics	umps-1
WBGene00011560	0.2697	0.444597	0.643506	no	glp1ncl1 / glp1	Proteomics	T07C4.3
WBGene00011561	0.0504258	0.709648	0.840126	no	glp1ncl1 / glp1	Proteomics	ttr-15
WBGene00011571	-0.562263	0.00448209	0.0271489	yes	glp1ncl1 / glp1	Proteomics	ttr-46
WBGene00011573	-0.0467277	0.865326	0.920521	no	glp1ncl1 / glp1	Proteomics	anmt-3
WBGene00011580	0.459568	0.110645	0.271891	no	glp1ncl1 / glp1	Proteomics	ddx-19
WBGene00011587	-0.21364	0.529525	0.711325	no	glp1ncl1 / glp1	Proteomics	T07F10.1
WBGene00011605	0.0204489	0.848006	0.912784	no	glp1ncl1 / glp1	Proteomics	T08A11.2
WBGene00011629	-0.133892	0.0315222	0.11305	no	glp1ncl1 / glp1	Proteomics	T08G11.1
WBGene00011634	0.180585	0.131044	0.302007	no	glp1ncl1 / glp1	Proteomics	T09A5.5
WBGene00011636	0.742923	0.2092	0.410745	no	glp1ncl1 / glp1	Proteomics	cec-3
WBGene00011637	0.107745	0.298692	0.508426	no	glp1ncl1 / glp1	Proteomics	sds-22
WBGene00011638	-0.102259	0.200906	0.401399	no	glp1ncl1 / glp1	Proteomics	ostb-1
WBGene00011645	-0.283556	0.638977	0.792425	no	glp1ncl1 / glp1	Proteomics	T09B9.4
WBGene00011668	-0.888979	0.310044	0.519785	no	glp1ncl1 / glp1	Proteomics	clec-47
WBGene00011676	-0.851421	0.164049	0.351599	no	glp1ncl1 / glp1	Proteomics	cyp-13A2
WBGene00011679	-0.102359	0.0616462	0.184094	no	glp1ncl1 / glp1	Proteomics	ucr-2.2
WBGene00011687	-1.37111	5.48618e-07	1.8822e-05	yes	glp1ncl1 / glp1	Proteomics	T10C6.5
WBGene00011694	0.257502	0.524953	0.708969	no	glp1ncl1 / glp1	Proteomics	T10G3.3
WBGene00011722	-0.120953	0.229391	0.43277	no	glp1ncl1 / glp1	Proteomics	T11G6.8
WBGene00011725	0.311751	0.673049	0.817408	no	glp1ncl1 / glp1	Proteomics	lips-5
WBGene00011730	0.788222	0.000945542	0.00841339	yes	glp1ncl1 / glp1	Proteomics	drr-2
WBGene00011734	-0.156882	0.109259	0.269135	no	glp1ncl1 / glp1	Proteomics	mlc-5
WBGene00011735	-0.0875973	0.237616	0.442467	no	glp1ncl1 / glp1	Proteomics	hip-1
WBGene00011736	0.143117	0.0558359	0.171436	no	glp1ncl1 / glp1	Proteomics	T12D8.9
WBGene00011740	0.470446	0.000757541	0.00707038	yes	glp1ncl1 / glp1	Proteomics	mrpl-51
WBGene00011743	0.259948	0.00329691	0.0217796	yes	glp1ncl1 / glp1	Proteomics	T13F2.2
WBGene00011753	-0.263254	0.0958818	0.247573	no	glp1ncl1 / glp1	Proteomics	T13F3.6
WBGene00011756	0.152212	0.604771	0.766194	no	glp1ncl1 / glp1	Proteomics	ctg-2
WBGene00011758	0.106102	0.158116	0.344104	no	glp1ncl1 / glp1	Proteomics	T13H5.4
WBGene00011759	0.154799	0.198681	0.398647	no	glp1ncl1 / glp1	Proteomics	mrps-18B
WBGene00011767	0.0745073	0.198439	0.398444	no	glp1ncl1 / glp1	Proteomics	T14D7.1
WBGene00011771	-0.0172114	0.829064	0.902712	no	glp1ncl1 / glp1	Proteomics	T14G8.3
WBGene00011775	-0.0456416	0.525255	0.708969	no	glp1ncl1 / glp1	Proteomics	T14G10.5
WBGene00011795	0.726465	0.0234531	0.0914603	no	glp1ncl1 / glp1	Proteomics	T16A9.5
WBGene00011802	1.14546	0.0672222	0.194651	no	glp1ncl1 / glp1	Proteomics	T16G1.9
WBGene00011803	-0.0853082	0.804383	0.89207	no	glp1ncl1 / glp1	Proteomics	T16G12.1
WBGene00011831	-0.0402154	0.547363	0.723365	no	glp1ncl1 / glp1	Proteomics	T19B10.2
WBGene00011859	-0.751654	0.0830088	0.225595	no	glp1ncl1 / glp1	Proteomics	T20D3.6
WBGene00011867	-0.110892	0.192313	0.391032	no	glp1ncl1 / glp1	Proteomics	chc-1
WBGene00011872	-0.031613	0.928824	0.956014	no	glp1ncl1 / glp1	Proteomics	blos-1
WBGene00011880	0.0235128	0.73859	0.856989	no	glp1ncl1 / glp1	Proteomics	T21B6.3
WBGene00011883	0.288163	0.0114245	0.0542264	no	glp1ncl1 / glp1	Proteomics	mrpl-50
WBGene00011884	-0.0552342	0.506433	0.695993	no	glp1ncl1 / glp1	Proteomics	enol-1
WBGene00011891	-0.333618	0.00189891	0.013955	yes	glp1ncl1 / glp1	Proteomics	del-6
WBGene00011897	0.187141	0.100759	0.255622	no	glp1ncl1 / glp1	Proteomics	scpl-4
WBGene00011906	0.0810045	0.413355	0.617923	no	glp1ncl1 / glp1	Proteomics	hsp-12.1
WBGene00011911	-0.238503	0.622007	0.778019	no	glp1ncl1 / glp1	Proteomics	T22B3.3
WBGene00011917	0.0924465	0.233889	0.439034	no	glp1ncl1 / glp1	Proteomics	T22C1.6
WBGene00011932	-0.152173	0.248665	0.458564	no	glp1ncl1 / glp1	Proteomics	sptl-3
WBGene00011938	-0.229448	0.011853	0.0553706	no	glp1ncl1 / glp1	Proteomics	alh-13
WBGene00011939	-0.118491	0.337019	0.543361	no	glp1ncl1 / glp1	Proteomics	prmt-3
WBGene00011953	-0.0677981	0.371634	0.578687	no	glp1ncl1 / glp1	Proteomics	ppm-2
WBGene00011966	2.19283	9.93592e-08	4.08026e-06	yes	glp1ncl1 / glp1	Proteomics	T23G7.3
WBGene00011971	0.853283	0.343871	0.550339	no	glp1ncl1 / glp1	Proteomics	lron-9
WBGene00011972	0.00462664	0.9645	0.976984	no	glp1ncl1 / glp1	Proteomics	T23G11.7
WBGene00011977	-0.141792	0.26857	0.481313	no	glp1ncl1 / glp1	Proteomics	T24B8.3
WBGene00011979	-1.14976	0.000425388	0.00444617	yes	glp1ncl1 / glp1	Proteomics	T24B8.5
WBGene00012000	0.157025	0.702403	0.836324	no	glp1ncl1 / glp1	Proteomics	T24H10.1
WBGene00012007	-0.156019	0.0552721	0.170107	no	glp1ncl1 / glp1	Proteomics	T25B9.1
WBGene00012015	-0.212852	0.00946685	0.0470132	yes	glp1ncl1 / glp1	Proteomics	T25B9.9
WBGene00012018	-0.313724	0.000534353	0.0053122	yes	glp1ncl1 / glp1	Proteomics	T25C12.3
WBGene00012020	0.231377	0.709399	0.840126	no	glp1ncl1 / glp1	Proteomics	gyg-2
WBGene00012030	0.825864	9.31296e-06	0.000216971	yes	glp1ncl1 / glp1	Proteomics	T25G3.3,chs-1
WBGene00012031	-0.125519	0.0508107	0.160201	no	glp1ncl1 / glp1	Proteomics	T25G3.4
WBGene00012037	0.23201	0.319023	0.526534	no	glp1ncl1 / glp1	Proteomics	T26E3.4
WBGene00012087	-0.306406	0.228025	0.431726	no	glp1ncl1 / glp1	Proteomics	T27E7.1
WBGene00012094	-0.13118	0.389589	0.596794	no	glp1ncl1 / glp1	Proteomics	T27E9.2
WBGene00012097	0.353721	0.00017535	0.0022581	yes	glp1ncl1 / glp1	Proteomics	abcf-2
WBGene00012118	0.156803	0.336656	0.543349	no	glp1ncl1 / glp1	Proteomics	grsp-2
WBGene00012121	0.680219	0.326432	0.533211	no	glp1ncl1 / glp1	Proteomics	T28C6.7
WBGene00012123	-0.494317	0.000349451	0.00382267	yes	glp1ncl1 / glp1	Proteomics	T28D6.3
WBGene00012126	0.21195	0.0105952	0.0510041	no	glp1ncl1 / glp1	Proteomics	T28D6.6
WBGene00012140	0.124306	0.253871	0.464239	no	glp1ncl1 / glp1	Proteomics	T28F4.5
WBGene00012143	-0.836331	0.13202	0.303327	no	glp1ncl1 / glp1	Proteomics	T28H10.2
WBGene00012148	0.101218	0.221268	0.425956	no	glp1ncl1 / glp1	Proteomics	inos-1
WBGene00012149	-0.182532	0.171579	0.361643	no	glp1ncl1 / glp1	Proteomics	VF13D12L.3
WBGene00012156	0.0136212	0.904381	0.942096	no	glp1ncl1 / glp1	Proteomics	ebp-2
WBGene00012158	-0.098767	0.117536	0.282011	no	glp1ncl1 / glp1	Proteomics	ucr-2.1
WBGene00012166	0.0116654	0.900671	0.940742	no	glp1ncl1 / glp1	Proteomics	nuo-6
WBGene00012179	0.128738	0.371352	0.578543	no	glp1ncl1 / glp1	Proteomics	W01D2.1
WBGene00012185	0.269232	0.0474595	0.153439	no	glp1ncl1 / glp1	Proteomics	W01F3.2
WBGene00012187	0.343097	0.449864	0.647641	no	glp1ncl1 / glp1	Proteomics	rpb-11
WBGene00012205	0.177425	0.37231	0.579444	no	glp1ncl1 / glp1	Proteomics	W02B12.10
WBGene00012244	0.0932742	0.473959	0.669317	no	glp1ncl1 / glp1	Proteomics	mrps-11
WBGene00012253	-0.607536	0.00010509	0.00147805	yes	glp1ncl1 / glp1	Proteomics	clec-50
WBGene00012258	-0.293504	0.00973424	0.0479176	yes	glp1ncl1 / glp1	Proteomics	W04G3.5
WBGene00012274	-0.267997	0.0034423	0.0224006	yes	glp1ncl1 / glp1	Proteomics	W05B5.1
WBGene00012276	1.0724	0.102061	0.257857	no	glp1ncl1 / glp1	Proteomics	his-74
WBGene00012291	-0.0531749	0.663259	0.809833	no	glp1ncl1 / glp1	Proteomics	W06A7.2
WBGene00012315	-0.402362	0.125117	0.292616	no	glp1ncl1 / glp1	Proteomics	immt-2
WBGene00012316	0.491281	5.48872e-07	1.8822e-05	yes	glp1ncl1 / glp1	Proteomics	ctps-1
WBGene00012326	-0.191061	0.015376	0.0662936	no	glp1ncl1 / glp1	Proteomics	W07E11.1
WBGene00012342	1.17263	0.0100572	0.0489547	yes	glp1ncl1 / glp1	Proteomics	mtr-4
WBGene00012343	-0.00531372	0.944462	0.966308	no	glp1ncl1 / glp1	Proteomics	W08E3.2
WBGene00012344	0.11016	0.0496211	0.157262	no	glp1ncl1 / glp1	Proteomics	ola-1
WBGene00012348	0.0212849	0.791531	0.88392	no	glp1ncl1 / glp1	Proteomics	pptr-1
WBGene00012351	1.16032	1.2956e-10	1.27554e-08	yes	glp1ncl1 / glp1	Proteomics	W09C5.1
WBGene00012354	0.0108753	0.905798	0.942578	no	glp1ncl1 / glp1	Proteomics	W09C5.8
WBGene00012359	-0.0318162	0.760672	0.868482	no	glp1ncl1 / glp1	Proteomics	W09D10.1
WBGene00012361	0.403832	3.87221e-05	0.000666743	yes	glp1ncl1 / glp1	Proteomics	mrpl-12
WBGene00012362	-0.135766	0.158052	0.344104	no	glp1ncl1 / glp1	Proteomics	W09D10.4
WBGene00012364	-0.385724	0.000705623	0.0066468	yes	glp1ncl1 / glp1	Proteomics	W09D12.1
WBGene00012375	-0.204636	0.00439261	0.0268125	yes	glp1ncl1 / glp1	Proteomics	mecr-1
WBGene00012376	-0.0378438	0.808459	0.893522	no	glp1ncl1 / glp1	Proteomics	nduf-7
WBGene00012382	-0.22829	0.0947224	0.245827	no	glp1ncl1 / glp1	Proteomics	ttr-16
WBGene00012383	0.329339	0.22817	0.431726	no	glp1ncl1 / glp1	Proteomics	ttr-17
WBGene00012407	-0.751257	0.141546	0.320711	no	glp1ncl1 / glp1	Proteomics	Y7A5A.1
WBGene00012416	0.671415	0.317577	0.525429	no	glp1ncl1 / glp1	Proteomics	Y7A9A.1
WBGene00012434	-0.190735	0.0309299	0.111846	no	glp1ncl1 / glp1	Proteomics	Y11D7A.10
WBGene00012445	-0.273931	0.462101	0.658111	no	glp1ncl1 / glp1	Proteomics	Y16B4A.2
WBGene00012457	0.00334694	0.99407	0.996028	no	glp1ncl1 / glp1	Proteomics	acbp-6
WBGene00012459	-0.195926	0.0269726	0.10138	no	glp1ncl1 / glp1	Proteomics	Y17G7B.3
WBGene00012465	1.83293	0.000528639	0.00528089	yes	glp1ncl1 / glp1	Proteomics	Y17G7B.12,glb-29
WBGene00012479	0.396682	0.310304	0.519785	no	glp1ncl1 / glp1	Proteomics	Y18D10A.9
WBGene00012481	-0.190558	0.600296	0.762423	no	glp1ncl1 / glp1	Proteomics	Y18D10A.11
WBGene00012483	0.633353	0.140469	0.318744	no	glp1ncl1 / glp1	Proteomics	Y18D10A.16
WBGene00012484	0.0564035	0.542934	0.720137	no	glp1ncl1 / glp1	Proteomics	car-1
WBGene00012514	-0.0934924	0.415192	0.619172	no	glp1ncl1 / glp1	Proteomics	Y26E6A.3
WBGene00012530	-0.212679	0.649099	0.798811	no	glp1ncl1 / glp1	Proteomics	F22E12.1,Y32F6A.5
WBGene00012538	0.208936	0.0865094	0.231399	no	glp1ncl1 / glp1	Proteomics	Y37A1B.5
WBGene00012544	-0.435737	1.18149e-06	3.67949e-05	yes	glp1ncl1 / glp1	Proteomics	Y37D8A.2
WBGene00012550	0.0175943	0.852333	0.914991	no	glp1ncl1 / glp1	Proteomics	hpo-21
WBGene00012551	0.352722	0.34039	0.54735	no	glp1ncl1 / glp1	Proteomics	cec-7
WBGene00012553	-0.0566828	0.402458	0.607915	no	glp1ncl1 / glp1	Proteomics	cco-2
WBGene00012555	-1.81285	0.0237448	0.0923175	no	glp1ncl1 / glp1	Proteomics	Y37D8A.17
WBGene00012557	-0.581221	0.0326455	0.115853	no	glp1ncl1 / glp1	Proteomics	Y37D8A.19
WBGene00012559	-0.16574	0.281637	0.493431	no	glp1ncl1 / glp1	Proteomics	epg-3
WBGene00012578	-0.0739948	0.587786	0.752169	no	glp1ncl1 / glp1	Proteomics	Y37H9A.3
WBGene00012595	-0.0763084	0.833518	0.905301	no	glp1ncl1 / glp1	Proteomics	Y38E10A.17
WBGene00012600	0.3925	0.000646424	0.00618459	yes	glp1ncl1 / glp1	Proteomics	Y38E10A.22
WBGene00012602	0.179966	0.041644	0.139056	no	glp1ncl1 / glp1	Proteomics	Y38E10A.24
WBGene00012608	-0.274329	0.000911278	0.00813222	yes	glp1ncl1 / glp1	Proteomics	Y38F1A.6
WBGene00012615	-0.286162	0.00189641	0.013955	yes	glp1ncl1 / glp1	Proteomics	dct-16
WBGene00012643	0.236716	0.733053	0.854776	no	glp1ncl1 / glp1	Proteomics	Y39A1A.3
WBGene00012645	0.132214	0.134883	0.308594	no	glp1ncl1 / glp1	Proteomics	mrpl-22
WBGene00012652	2.01677	3.8886e-05	0.000666743	yes	glp1ncl1 / glp1	Proteomics	Y39A1A.14
WBGene00012664	-0.176514	0.209337	0.410745	no	glp1ncl1 / glp1	Proteomics	Y39B6A.1
WBGene00012665	0.0617181	0.425717	0.627372	no	glp1ncl1 / glp1	Proteomics	pph-5
WBGene00012666	-0.0985285	0.876933	0.925769	no	glp1ncl1 / glp1	Proteomics	Y39B6A.3
WBGene00012676	0.860513	4.76039e-09	3.2286e-07	yes	glp1ncl1 / glp1	Proteomics	pro-3
WBGene00012692	1.39684	2.60543e-07	9.93171e-06	yes	glp1ncl1 / glp1	Proteomics	Y39B6A.33
WBGene00012693	-0.0175491	0.935301	0.960205	no	glp1ncl1 / glp1	Proteomics	Y39B6A.34
WBGene00012694	0.570181	0.224716	0.42802	no	glp1ncl1 / glp1	Proteomics	Y39B6A.36
WBGene00012697	0.248268	0.00119632	0.00989478	yes	glp1ncl1 / glp1	Proteomics	mrps-35
WBGene00012704	0.480156	0.551528	0.72552	no	glp1ncl1 / glp1	Proteomics	mlt-3
WBGene00012713	-0.172228	0.00497339	0.029465	yes	glp1ncl1 / glp1	Proteomics	Y39E4A.3
WBGene00012714	0.476133	1.19531e-08	7.01555e-07	yes	glp1ncl1 / glp1	Proteomics	abce-1
WBGene00012722	-0.235915	0.000391145	0.0041595	yes	glp1ncl1 / glp1	Proteomics	Y39G8B.1
WBGene00012730	-0.16242	0.754697	0.86494	no	glp1ncl1 / glp1	Proteomics	xrn-1
WBGene00012738	0.0784639	0.149435	0.332175	no	glp1ncl1 / glp1	Proteomics	eif-3.J
WBGene00012765	-1.11827	0.101007	0.255622	no	glp1ncl1 / glp1	Proteomics	Y41E3.7
WBGene00012768	0.288142	0.000476475	0.00486356	yes	glp1ncl1 / glp1	Proteomics	Y41E3.11,eef-1B.2
WBGene00012803	-0.186379	0.0285209	0.105758	no	glp1ncl1 / glp1	Proteomics	Y43F4B.5
WBGene00012812	-0.0633191	0.272508	0.483929	no	glp1ncl1 / glp1	Proteomics	Y43F8B.1
WBGene00012829	-0.0649151	0.440957	0.641163	no	glp1ncl1 / glp1	Proteomics	Y43F8C.7
WBGene00012830	0.254725	0.00449178	0.0271489	yes	glp1ncl1 / glp1	Proteomics	mrps-28
WBGene00012834	-0.36592	0.000986397	0.00860138	yes	glp1ncl1 / glp1	Proteomics	Y43F8C.13
WBGene00012853	-0.0544858	0.719548	0.845941	no	glp1ncl1 / glp1	Proteomics	Y44A6D.2
WBGene00012858	1.51701	3.74334e-06	9.84885e-05	yes	glp1ncl1 / glp1	Proteomics	Y44F5A.1
WBGene00012860	-0.125344	0.203372	0.404359	no	glp1ncl1 / glp1	Proteomics	acdh-11
WBGene00012875	0.093374	0.395972	0.603047	no	glp1ncl1 / glp1	Proteomics	Y45F10B.13
WBGene00012878	-0.248775	0.555288	0.727412	no	glp1ncl1 / glp1	Proteomics	Y45F10C.2
WBGene00012880	-0.343967	0.129538	0.299442	no	glp1ncl1 / glp1	Proteomics	Y45F10C.4
WBGene00012885	0.062404	0.469627	0.665865	no	glp1ncl1 / glp1	Proteomics	Y45F10D.4
WBGene00012887	1.61124	4.8653e-10	4.01322e-08	yes	glp1ncl1 / glp1	Proteomics	Y45F10D.7
WBGene00012890	-0.0157608	0.957984	0.973006	no	glp1ncl1 / glp1	Proteomics	lact-9
WBGene00012896	0.0500177	0.752603	0.864717	no	glp1ncl1 / glp1	Proteomics	snrp-200
WBGene00012901	-0.157783	0.274672	0.484566	no	glp1ncl1 / glp1	Proteomics	cnp-2
WBGene00012903	-0.127236	0.0179543	0.0748588	no	glp1ncl1 / glp1	Proteomics	vps-2
WBGene00012907	0.0778444	0.408684	0.613525	no	glp1ncl1 / glp1	Proteomics	cpt-1
WBGene00012909	-0.0465029	0.549063	0.724174	no	glp1ncl1 / glp1	Proteomics	spds-1
WBGene00012928	-0.411099	0.42233	0.624189	no	glp1ncl1 / glp1	Proteomics	aakb-2
WBGene00012929	0.375159	0.00107513	0.00921709	yes	glp1ncl1 / glp1	Proteomics	rsks-1
WBGene00012930	-0.124603	0.865864	0.920773	no	glp1ncl1 / glp1	Proteomics	obr-1
WBGene00012932	0.0407312	0.76213	0.868856	no	glp1ncl1 / glp1	Proteomics	Y47D3A.21
WBGene00012964	1.43731	3.06703e-10	2.67445e-08	yes	glp1ncl1 / glp1	Proteomics	Y48A6B.3
WBGene00012966	0.757242	0.120812	0.287387	no	glp1ncl1 / glp1	Proteomics	exos-1
WBGene00012968	-0.138503	0.240661	0.447319	no	glp1ncl1 / glp1	Proteomics	Y48A6B.7
WBGene00012973	-0.0206751	0.743947	0.860048	no	glp1ncl1 / glp1	Proteomics	spat-2
WBGene00012978	2.12988	3.33227e-11	4.82003e-09	yes	glp1ncl1 / glp1	Proteomics	Y48B6A.1
WBGene00012983	-0.122834	0.0878771	0.232813	no	glp1ncl1 / glp1	Proteomics	men-1
WBGene00012984	0.942977	0.00849898	0.0435216	yes	glp1ncl1 / glp1	Proteomics	Y48B6A.13
WBGene00012992	0.265701	0.0187741	0.0774304	no	glp1ncl1 / glp1	Proteomics	mrpl-20
WBGene00012996	-0.000669457	0.993477	0.995978	no	glp1ncl1 / glp1	Proteomics	pinn-4
WBGene00012998	1.62898	0.00303848	0.0202036	yes	glp1ncl1 / glp1	Proteomics	Y48C3A.20
WBGene00012999	1.48885	1.39232e-11	2.36075e-09	yes	glp1ncl1 / glp1	Proteomics	rpoa-1
WBGene00013004	0.428938	0.000115698	0.00161237	yes	glp1ncl1 / glp1	Proteomics	mrpl-37
WBGene00013017	0.101379	0.627969	0.782343	no	glp1ncl1 / glp1	Proteomics	Y48E1C.4
WBGene00013018	-0.0992772	0.197621	0.397588	no	glp1ncl1 / glp1	Proteomics	Y48G10A.1
WBGene00013020	0.765376	0.156423	0.342787	no	glp1ncl1 / glp1	Proteomics	Y48G10A.3
WBGene00013025	-0.282559	0.000741794	0.00694943	yes	glp1ncl1 / glp1	Proteomics	Y49A3A.3,vha-13
WBGene00013029	-0.149691	0.113732	0.277244	no	glp1ncl1 / glp1	Proteomics	glrx-5
WBGene00013035	-0.943358	0.10651	0.264979	no	glp1ncl1 / glp1	Proteomics	Y49E10.16
WBGene00013037	-0.709843	0.0250755	0.0965076	no	glp1ncl1 / glp1	Proteomics	Y49E10.18
WBGene00013038	-0.332094	0.45127	0.647825	no	glp1ncl1 / glp1	Proteomics	ani-1
WBGene00013039	-0.551665	0.30976	0.519729	no	glp1ncl1 / glp1	Proteomics	scav-3
WBGene00013077	-0.163205	0.0420731	0.139725	no	glp1ncl1 / glp1	Proteomics	ttr-24
WBGene00013078	0.0738991	0.495384	0.686687	no	glp1ncl1 / glp1	Proteomics	ttr-25
WBGene00013079	0.637366	0.000615753	0.00593649	yes	glp1ncl1 / glp1	Proteomics	ttr-26
WBGene00013094	0.111096	0.155521	0.342103	no	glp1ncl1 / glp1	Proteomics	Y51H1A.3
WBGene00013103	0.187389	0.535983	0.716523	no	glp1ncl1 / glp1	Proteomics	Y51H4A.7
WBGene00013106	-0.365952	0.499189	0.690002	no	glp1ncl1 / glp1	Proteomics	set-26
WBGene00013140	0.0202153	0.962399	0.97539	no	glp1ncl1 / glp1	Proteomics	mop-25.2
WBGene00013143	1.49706	0.00134103	0.010799	yes	glp1ncl1 / glp1	Proteomics	Y53C12B.1
WBGene00013144	1.57338	0.00132719	0.0107158	yes	glp1ncl1 / glp1	Proteomics	Y53C12B.2
WBGene00013151	2.12853	0.000136015	0.00182871	yes	glp1ncl1 / glp1	Proteomics	nsun-5
WBGene00013160	0.030172	0.895487	0.937618	no	glp1ncl1 / glp1	Proteomics	Y53F4B.13
WBGene00013164	-0.0256238	0.857836	0.917678	no	glp1ncl1 / glp1	Proteomics	Y53F4B.18
WBGene00013168	-0.0225349	0.756232	0.866049	no	glp1ncl1 / glp1	Proteomics	arp-1
WBGene00013176	-0.116125	0.106377	0.264979	no	glp1ncl1 / glp1	Proteomics	Y53F4B.39
WBGene00013181	-0.00734434	0.962428	0.97539	no	glp1ncl1 / glp1	Proteomics	Y53H1B.2
WBGene00013200	0.471218	0.000197766	0.00251319	yes	glp1ncl1 / glp1	Proteomics	Y54E5A.5
WBGene00013209	0.295	0.584448	0.748771	no	glp1ncl1 / glp1	Proteomics	bub-3
WBGene00013210	0.338656	0.00791592	0.0416241	yes	glp1ncl1 / glp1	Proteomics	Y54G9A.7
WBGene00013213	-0.102716	0.301339	0.510937	no	glp1ncl1 / glp1	Proteomics	Y54G11A.2
WBGene00013214	0.157391	0.694759	0.831482	no	glp1ncl1 / glp1	Proteomics	Y54G11A.3
WBGene00013217	0.328236	0.457152	0.654667	no	glp1ncl1 / glp1	Proteomics	Y54G11A.9,ddl-3
WBGene00013228	0.0133249	0.87241	0.923551	no	glp1ncl1 / glp1	Proteomics	Y56A3A.7
WBGene00013232	-0.107992	0.296535	0.507017	no	glp1ncl1 / glp1	Proteomics	faah-4
WBGene00013236	0.961443	0.0711677	0.203565	no	glp1ncl1 / glp1	Proteomics	Y56A3A.18
WBGene00013237	-0.202078	0.809554	0.893583	no	glp1ncl1 / glp1	Proteomics	Y56A3A.19
WBGene00013238	-0.0512987	0.676034	0.819506	no	glp1ncl1 / glp1	Proteomics	trap-4
WBGene00013255	0.00855547	0.969655	0.980261	no	glp1ncl1 / glp1	Proteomics	Y57A10A.10
WBGene00013263	0.227566	0.10532	0.263473	no	glp1ncl1 / glp1	Proteomics	Y57A10A.23
WBGene00013266	0.0861981	0.355773	0.562533	no	glp1ncl1 / glp1	Proteomics	Y57A10A.26
WBGene00013267	1.70476	1.84082e-06	5.40209e-05	yes	glp1ncl1 / glp1	Proteomics	Y57A10A.27
WBGene00013269	0.406435	0.0129213	0.0582509	no	glp1ncl1 / glp1	Proteomics	Y57A10A.29
WBGene00013270	-0.935865	0.0518749	0.163028	no	glp1ncl1 / glp1	Proteomics	Y57A10A.31
WBGene00013284	-0.263294	0.000985801	0.00860138	yes	glp1ncl1 / glp1	Proteomics	daf-22
WBGene00013289	-0.0438794	0.565925	0.734667	no	glp1ncl1 / glp1	Proteomics	tag-273
WBGene00013290	0.120523	0.770293	0.872332	no	glp1ncl1 / glp1	Proteomics	Y57G11A.2
WBGene00013297	-0.680538	0.000300516	0.0034173	yes	glp1ncl1 / glp1	Proteomics	Y57G11B.5
WBGene00013301	-0.237143	0.0607359	0.182447	no	glp1ncl1 / glp1	Proteomics	Y57G11C.3
WBGene00013308	-0.101559	0.230218	0.43372	no	glp1ncl1 / glp1	Proteomics	nuo-3
WBGene00013311	-0.125422	0.460542	0.657425	no	glp1ncl1 / glp1	Proteomics	sec-61
WBGene00013324	0.370738	0.000296674	0.0034012	yes	glp1ncl1 / glp1	Proteomics	mrps-7
WBGene00013340	0.0450654	0.473539	0.669317	no	glp1ncl1 / glp1	Proteomics	tcc-1
WBGene00013343	-0.201227	0.145254	0.325727	no	glp1ncl1 / glp1	Proteomics	prp-6
WBGene00013344	0.0195344	0.848184	0.912784	no	glp1ncl1 / glp1	Proteomics	ebp-1
WBGene00013347	-0.142079	0.107673	0.266734	no	glp1ncl1 / glp1	Proteomics	Y59A8B.10
WBGene00013352	-0.817938	0.125535	0.292925	no	glp1ncl1 / glp1	Proteomics	lon-8
WBGene00013354	0.0472349	0.537763	0.717644	no	glp1ncl1 / glp1	Proteomics	snx-6
WBGene00013355	0.127716	0.47365	0.669317	no	glp1ncl1 / glp1	Proteomics	gck-3
WBGene00013360	-0.173583	0.0997605	0.254999	no	glp1ncl1 / glp1	Proteomics	Y60A3A.9
WBGene00013361	-0.000463961	0.997086	0.99821	no	glp1ncl1 / glp1	Proteomics	fars-2
WBGene00013366	-0.690588	0.0384276	0.131925	no	glp1ncl1 / glp1	Proteomics	Y60A3A.21
WBGene00013376	-0.0363721	0.745592	0.861297	no	glp1ncl1 / glp1	Proteomics	Y62E10A.6
WBGene00013387	-0.159255	0.66004	0.808364	no	glp1ncl1 / glp1	Proteomics	Y62F5A.9
WBGene00013391	-0.578105	0.00142815	0.0112413	yes	glp1ncl1 / glp1	Proteomics	Y62H9A.3
WBGene00013392	-0.483192	0.00108605	0.00925869	yes	glp1ncl1 / glp1	Proteomics	Y62H9A.4
WBGene00013393	-0.562121	0.0012538	0.010259	yes	glp1ncl1 / glp1	Proteomics	Y62H9A.5
WBGene00013394	-0.564712	0.000236078	0.00282553	yes	glp1ncl1 / glp1	Proteomics	Y62H9A.6
WBGene00013406	-0.0330631	0.580106	0.74484	no	glp1ncl1 / glp1	Proteomics	Y63D3A.7
WBGene00013434	0.911022	0.0479652	0.153771	no	glp1ncl1 / glp1	Proteomics	Y66D12A.8
WBGene00013435	0.212656	0.0123901	0.0568641	no	glp1ncl1 / glp1	Proteomics	Y66D12A.9
WBGene00013463	-0.028253	0.807224	0.893075	no	glp1ncl1 / glp1	Proteomics	Y67H2A.5
WBGene00013474	0.23725	0.544437	0.72119	no	glp1ncl1 / glp1	Proteomics	Y69E1A.2
WBGene00013477	0.0436347	0.659964	0.808364	no	glp1ncl1 / glp1	Proteomics	Y69E1A.5
WBGene00013481	-0.407701	0.127265	0.295595	no	glp1ncl1 / glp1	Proteomics	Y69H2.3
WBGene00013489	-0.72154	0.0405846	0.137474	no	glp1ncl1 / glp1	Proteomics	col-42
WBGene00013514	1.32982	0.037674	0.130069	no	glp1ncl1 / glp1	Proteomics	Y73F4A.1
WBGene00013515	0.249545	0.640741	0.79365	no	glp1ncl1 / glp1	Proteomics	Y73F4A.2
WBGene00013532	-0.0584332	0.581787	0.745743	no	glp1ncl1 / glp1	Proteomics	Y73F8A.26,Y73F8A.27
WBGene00013544	2.15138	6.09345e-07	2.04365e-05	yes	glp1ncl1 / glp1	Proteomics	Y75B8A.7
WBGene00013575	-0.234711	0.00571255	0.0325275	yes	glp1ncl1 / glp1	Proteomics	acs-5
WBGene00013597	-0.124399	0.124277	0.291989	no	glp1ncl1 / glp1	Proteomics	gpi-1
WBGene00013606	-0.158066	0.0903337	0.237466	no	glp1ncl1 / glp1	Proteomics	cand-1
WBGene00013633	-0.266174	0.20055	0.401196	no	glp1ncl1 / glp1	Proteomics	Y105C5A.8
WBGene00013647	0.447615	0.00445219	0.027071	yes	glp1ncl1 / glp1	Proteomics	Y105C5B.5
WBGene00013650	-0.118698	0.210283	0.411928	no	glp1ncl1 / glp1	Proteomics	Y105C5B.9
WBGene00013654	-0.083406	0.862102	0.919335	no	glp1ncl1 / glp1	Proteomics	Y105C5B.15
WBGene00013671	-0.261475	0.00144532	0.0113105	yes	glp1ncl1 / glp1	Proteomics	Y105E8A.11
WBGene00013677	0.270666	0.00422007	0.0260722	yes	glp1ncl1 / glp1	Proteomics	yars-1
WBGene00013690	-0.292654	0.00115883	0.00966322	yes	glp1ncl1 / glp1	Proteomics	hprt-1
WBGene00013697	-0.542845	0.141865	0.321195	no	glp1ncl1 / glp1	Proteomics	dsbn-1
WBGene00013704	-0.126287	0.821341	0.898864	no	glp1ncl1 / glp1	Proteomics	Y106G6D.8
WBGene00013718	-0.294576	0.289194	0.500919	no	glp1ncl1 / glp1	Proteomics	Y106G6H.5
WBGene00013724	-0.0330774	0.640745	0.79365	no	glp1ncl1 / glp1	Proteomics	Y106G6H.14
WBGene00013735	1.35814	0.000198453	0.00251319	yes	glp1ncl1 / glp1	Proteomics	Y111B2A.12
WBGene00013737	-0.425039	0.219866	0.425235	no	glp1ncl1 / glp1	Proteomics	tpst-1
WBGene00013738	0.568624	0.123524	0.291117	no	glp1ncl1 / glp1	Proteomics	elpc-2
WBGene00013765	0.0682185	0.488078	0.6805	no	glp1ncl1 / glp1	Proteomics	cdkr-3
WBGene00013766	0.345477	0.00426293	0.026178	yes	glp1ncl1 / glp1	Proteomics	prmt-1
WBGene00013804	1.17072	0.0584972	0.177292	no	glp1ncl1 / glp1	Proteomics	Y116A8C.27
WBGene00013807	-0.0962175	0.578127	0.744452	no	glp1ncl1 / glp1	Proteomics	Y116A8C.30
WBGene00013808	0.0830711	0.417658	0.620882	no	glp1ncl1 / glp1	Proteomics	sfa-1
WBGene00013854	-0.791972	0.0313778	0.112789	no	glp1ncl1 / glp1	Proteomics	cyc-2.2
WBGene00013858	0.0842959	0.869412	0.921655	no	glp1ncl1 / glp1	Proteomics	ssp-34
WBGene00013859	0.136905	0.128775	0.298031	no	glp1ncl1 / glp1	Proteomics	ZC247.1
WBGene00013866	-0.135625	0.0480923	0.154017	no	glp1ncl1 / glp1	Proteomics	cbs-1
WBGene00013867	-0.488551	0.00248423	0.0172708	yes	glp1ncl1 / glp1	Proteomics	ZC373.2
WBGene00013880	0.159026	0.156456	0.342787	no	glp1ncl1 / glp1	Proteomics	mppb-1
WBGene00013882	-0.310523	0.065753	0.192221	no	glp1ncl1 / glp1	Proteomics	ZC410.5
WBGene00013884	-0.0115513	0.92878	0.956014	no	glp1ncl1 / glp1	Proteomics	ZC412.3
WBGene00013892	1.3213	0.00109131	0.00927762	yes	glp1ncl1 / glp1	Proteomics	ZC434.4
WBGene00013893	-0.351836	0.224718	0.42802	no	glp1ncl1 / glp1	Proteomics	ZC434.7
WBGene00013894	0.185699	0.677809	0.819506	no	glp1ncl1 / glp1	Proteomics	ZC434.8
WBGene00013896	-0.826318	0.0563432	0.172304	no	glp1ncl1 / glp1	Proteomics	ZC443.1
WBGene00013924	0.0914214	0.333077	0.539571	no	glp1ncl1 / glp1	Proteomics	rad-23
WBGene00013925	0.000189024	0.999229	0.999557	no	glp1ncl1 / glp1	Proteomics	ZK20.4
WBGene00013958	2.84623	0.00022057	0.00271443	yes	glp1ncl1 / glp1	Proteomics	ZK265.6
WBGene00013969	0.036432	0.705472	0.837756	no	glp1ncl1 / glp1	Proteomics	tep-1
WBGene00013983	1.43317	5.92219e-08	2.69769e-06	yes	glp1ncl1 / glp1	Proteomics	ZK512.2
WBGene00013984	0.107198	0.898417	0.938708	no	glp1ncl1 / glp1	Proteomics	ZK512.4
WBGene00013985	-0.871077	0.07295	0.206918	no	glp1ncl1 / glp1	Proteomics	sec-16
WBGene00013986	-0.545474	7.83163e-08	3.31974e-06	yes	glp1ncl1 / glp1	Proteomics	ZK512.7
WBGene00013987	-0.301472	0.445152	0.643614	no	glp1ncl1 / glp1	Proteomics	ZK512.8
WBGene00013997	0.169054	0.111732	0.27346	no	glp1ncl1 / glp1	Proteomics	ZK550.3
WBGene00013999	-0.402721	0.428245	0.628881	no	glp1ncl1 / glp1	Proteomics	ZK550.5
[truncated: 1,026 more rows]

## Sheet: Proteomics_RNAseq
ensembl_gene_id	log2(fold_change)	p_value	q_value	significant	comparison	technique	gene	rnaseq	significance
WBGene00003073	1.38183	9.75125e-16	2.97608e-12	yes	glp1ncl1 / glp1	Proteomics	lars-1	2.28297	yes
WBGene00000830	5.42626	3.578e-15	5.46002e-12	yes	glp1ncl1 / glp1	Proteomics	ctl-1	6.03084	yes
WBGene00022046	1.3158	3.64214e-14	3.70527e-11	yes	glp1ncl1 / glp1	Proteomics	Y66H1A.4	3.26667	yes
WBGene00003063	1.20086	6.06935e-14	4.63091e-11	yes	glp1ncl1 / glp1	Proteomics	lpd-7	2.23931	yes
WBGene00019275	1.25307	2.33516e-13	1.26148e-10	yes	glp1ncl1 / glp1	Proteomics	rpac-40	2.73791	yes
WBGene00015941	1.54416	2.47997e-13	1.26148e-10	yes	glp1ncl1 / glp1	Proteomics	C18A3.3	2.95034	yes
WBGene00015232	1.68593	3.71874e-13	1.62137e-10	yes	glp1ncl1 / glp1	Proteomics	B0511.6,arch-1	1.67922	yes
WBGene00011043	2.75666	4.56095e-13	1.66007e-10	yes	glp1ncl1 / glp1	Proteomics	rbm-28	2.26406	yes
WBGene00021843	1.35444	4.89536e-13	1.66007e-10	yes	glp1ncl1 / glp1	Proteomics	Y54E10BR.4	1.81584	yes
WBGene00020915	1.19943	9.7164e-13	2.96545e-10	yes	glp1ncl1 / glp1	Proteomics	nol-5	3.06342	yes
WBGene00020999	0.897022	1.5485e-12	4.19801e-10	yes	glp1ncl1 / glp1	Proteomics	W03F9.1	1.9921	yes
WBGene00010627	1.1732	1.65059e-12	4.19801e-10	yes	glp1ncl1 / glp1	Proteomics	K07C5.4	2.90907	yes
WBGene00011416	-1.21694	2.07236e-12	4.86527e-10	yes	glp1ncl1 / glp1	Proteomics	T04A11.1	#N/A	#N/A
WBGene00017075	0.914031	2.27672e-12	4.96325e-10	yes	glp1ncl1 / glp1	Proteomics	nap-1	1.90139	yes
WBGene00004315	2.48311	3.35962e-12	6.83571e-10	yes	glp1ncl1 / glp1	Proteomics	rbd-1	2.44518	yes
WBGene00011408	1.36251	3.76153e-12	7.17512e-10	yes	glp1ncl1 / glp1	Proteomics	T04A8.6	3.16216	yes
WBGene00001423	1.08558	7.53749e-12	1.3532e-09	yes	glp1ncl1 / glp1	Proteomics	fib-1	3.0095	yes
WBGene00012999	1.48885	1.39232e-11	2.36075e-09	yes	glp1ncl1 / glp1	Proteomics	rpoa-1	1.16656	yes
WBGene00017210	2.388	2.77601e-11	4.45916e-09	yes	glp1ncl1 / glp1	Proteomics	F07E5.5	3.2051	yes
WBGene00007708	1.3002	2.92329e-11	4.46094e-09	yes	glp1ncl1 / glp1	Proteomics	C25A1.16,nola-3	1.97481	yes
WBGene00012978	2.12988	3.33227e-11	4.82003e-09	yes	glp1ncl1 / glp1	Proteomics	Y48B6A.1	2.72789	yes
WBGene00003821	1.09939	3.47447e-11	4.82003e-09	yes	glp1ncl1 / glp1	Proteomics	nst-1	2.14964	yes
WBGene00010478	1.15897	6.40408e-11	8.25973e-09	yes	glp1ncl1 / glp1	Proteomics	K01G5.5	2.8284	yes
WBGene00008151	1.69734	6.4952e-11	8.25973e-09	yes	glp1ncl1 / glp1	Proteomics	C47E12.7	2.53938	yes
WBGene00019510	1.05735	6.89135e-11	8.41296e-09	yes	glp1ncl1 / glp1	Proteomics	K07H8.10	2.50866	yes
WBGene00000931	1.20219	7.56554e-11	8.88079e-09	yes	glp1ncl1 / glp1	Proteomics	dao-5	2.25282	yes
WBGene00006497	1.61541	9.45789e-11	1.06473e-08	yes	glp1ncl1 / glp1	Proteomics	tag-151	2.32514	yes
WBGene00020297	1.08774	9.88844e-11	1.06473e-08	yes	glp1ncl1 / glp1	Proteomics	T07A9.8,nog-1	2.08263	yes
WBGene00021073	1.05829	1.01171e-10	1.06473e-08	yes	glp1ncl1 / glp1	Proteomics	nol-1	2.7281	yes
WBGene00015916	1.3196	1.13628e-10	1.15597e-08	yes	glp1ncl1 / glp1	Proteomics	C17G10.2	2.19152	yes
WBGene00012351	1.16032	1.2956e-10	1.27554e-08	yes	glp1ncl1 / glp1	Proteomics	W09C5.1	1.39911	yes
WBGene00011116	0.977943	1.94985e-10	1.85967e-08	yes	glp1ncl1 / glp1	Proteomics	pdcd-2	0.925264	yes
WBGene00009993	1.29811	2.24478e-10	2.07608e-08	yes	glp1ncl1 / glp1	Proteomics	F53F4.11	2.80277	yes
WBGene00020682	0.706686	2.35438e-10	2.1134e-08	yes	glp1ncl1 / glp1	Proteomics	T22D1.3	0.915224	yes
WBGene00012964	1.43731	3.06703e-10	2.67445e-08	yes	glp1ncl1 / glp1	Proteomics	Y48A6B.3	3.04982	yes
WBGene00010230	1.34803	4.71257e-10	3.99521e-08	yes	glp1ncl1 / glp1	Proteomics	rpac-19	2.47315	yes
WBGene00012887	1.61124	4.8653e-10	4.01322e-08	yes	glp1ncl1 / glp1	Proteomics	Y45F10D.7	2.13377	yes
WBGene00021899	1.22293	5.31763e-10	4.2709e-08	yes	glp1ncl1 / glp1	Proteomics	Y54H5A.1	2.60182	yes
WBGene00002015	1.56697	6.41127e-10	5.01723e-08	yes	glp1ncl1 / glp1	Proteomics	hsp-16.1	1.28449	yes
WBGene00016653	0.771764	1.78337e-09	1.33923e-07	yes	glp1ncl1 / glp1	Proteomics	C44E4.4	2.14497	yes
WBGene00021830	1.29577	1.79909e-09	1.33923e-07	yes	glp1ncl1 / glp1	Proteomics	Y54E10A.10	3.07512	yes
WBGene00002020	1.73132	2.11647e-09	1.53797e-07	yes	glp1ncl1 / glp1	Proteomics	hsp-16.49	0.475603	no
WBGene00021686	0.745833	2.51365e-09	1.78411e-07	yes	glp1ncl1 / glp1	Proteomics	Y48G8AL.5	1.61735	yes
WBGene00010732	0.835147	3.88994e-09	2.6982e-07	yes	glp1ncl1 / glp1	Proteomics	K10C3.5	1.88926	yes
WBGene00012676	0.860513	4.76039e-09	3.2286e-07	yes	glp1ncl1 / glp1	Proteomics	pro-3	1.64657	yes
WBGene00010896	0.970776	5.88904e-09	3.90725e-07	yes	glp1ncl1 / glp1	Proteomics	M28.5	2.93996	yes
WBGene00022021	1.85806	6.36534e-09	4.13341e-07	yes	glp1ncl1 / glp1	Proteomics	Y61A9LA.10	2.19299	yes
WBGene00020389	1.14178	7.6651e-09	4.87149e-07	yes	glp1ncl1 / glp1	Proteomics	T10B5.3	1.81079	yes
WBGene00021828	0.824279	7.8212e-09	4.87149e-07	yes	glp1ncl1 / glp1	Proteomics	Y54E10A.6	1.664	yes
WBGene00014165	1.64499	9.26872e-09	5.65763e-07	yes	glp1ncl1 / glp1	Proteomics	puf-12	2.54152	yes
WBGene00010044	2.42795	1.02461e-08	6.13161e-07	yes	glp1ncl1 / glp1	Proteomics	F54C9.9	1.94142	yes
WBGene00012714	0.476133	1.19531e-08	7.01555e-07	yes	glp1ncl1 / glp1	Proteomics	abce-1	1.4871	yes
WBGene00018890	2.06962	1.32649e-08	7.63858e-07	yes	glp1ncl1 / glp1	Proteomics	F55F8.2	2.47	yes
WBGene00018891	1.36689	1.38289e-08	7.8159e-07	yes	glp1ncl1 / glp1	Proteomics	F55F8.3	2.11004	yes
WBGene00010790	1.63936	1.4338e-08	7.95629e-07	yes	glp1ncl1 / glp1	Proteomics	sodh-1	1.81382	yes
WBGene00008741	-0.890846	2.15731e-08	1.17573e-06	yes	glp1ncl1 / glp1	Proteomics	F13D12.6	-0.681631	yes
WBGene00017501	-1.98024	2.51833e-08	1.34841e-06	yes	glp1ncl1 / glp1	Proteomics	pud-3	-2.42224	yes
WBGene00019168	1.25533	2.73211e-08	1.43765e-06	yes	glp1ncl1 / glp1	Proteomics	H06I04.3	2.06241	yes
WBGene00019380	1.41865	3.33295e-08	1.7241e-06	yes	glp1ncl1 / glp1	Proteomics	K04C2.2	1.97048	yes
WBGene00019241	0.956619	3.47085e-08	1.7655e-06	yes	glp1ncl1 / glp1	Proteomics	H24K24.4	1.75055	yes
WBGene00000197	0.455544	3.56603e-08	1.78419e-06	yes	glp1ncl1 / glp1	Proteomics	aars-2	1.33984	yes
WBGene00010582	2.03908	4.60566e-08	2.26717e-06	yes	glp1ncl1 / glp1	Proteomics	K05C4.5	2.71361	yes
WBGene00003596	1.65591	4.82485e-08	2.33737e-06	yes	glp1ncl1 / glp1	Proteomics	ngp-1	2.55731	yes
WBGene00020382	0.449955	4.95127e-08	2.36114e-06	yes	glp1ncl1 / glp1	Proteomics	T09B4.8	1.20457	yes
WBGene00016073	1.2148	5.32561e-08	2.50058e-06	yes	glp1ncl1 / glp1	Proteomics	C24H12.4	2.1997	yes
WBGene00004990	-0.514612	5.90908e-08	2.69769e-06	yes	glp1ncl1 / glp1	Proteomics	spp-5	-0.43498	yes
WBGene00013983	1.43317	5.92219e-08	2.69769e-06	yes	glp1ncl1 / glp1	Proteomics	ZK512.2	2.70873	yes
WBGene00010204	-0.534448	6.73688e-08	3.00951e-06	yes	glp1ncl1 / glp1	Proteomics	F57F5.1	-0.113015	no
WBGene00003062	1.07179	6.80393e-08	3.00951e-06	yes	glp1ncl1 / glp1	Proteomics	lpd-6	2.43572	yes
WBGene00011538	2.31114	7.17406e-08	3.12789e-06	yes	glp1ncl1 / glp1	Proteomics	T06E6.1	2.90818	yes
WBGene00018893	1.11428	7.40858e-08	3.18465e-06	yes	glp1ncl1 / glp1	Proteomics	mff-2,wdr-12	1.65037	yes
WBGene00013986	-0.545474	7.83163e-08	3.31974e-06	yes	glp1ncl1 / glp1	Proteomics	ZK512.7	-0.343114	yes
WBGene00016607	1.0786	9.77813e-08	4.08026e-06	yes	glp1ncl1 / glp1	Proteomics	C43E11.9	3.27732	yes
WBGene00011966	2.19283	9.93592e-08	4.08026e-06	yes	glp1ncl1 / glp1	Proteomics	T23G7.3	2.03417	yes
WBGene00017855	1.81135	1.00268e-07	4.08026e-06	yes	glp1ncl1 / glp1	Proteomics	F27C1.6	1.56484	yes
WBGene00021900	1.40038	1.03499e-07	4.15628e-06	yes	glp1ncl1 / glp1	Proteomics	Y54H5A.2	1.88312	yes
WBGene00000276	1.97091	1.4534e-07	5.76076e-06	yes	glp1ncl1 / glp1	Proteomics	byn-1	2.17674	yes
WBGene00007617	1.8073	1.62664e-07	6.36474e-06	yes	glp1ncl1 / glp1	Proteomics	rrbs-1	2.61143	yes
WBGene00019800	0.780378	1.66852e-07	6.44598e-06	yes	glp1ncl1 / glp1	Proteomics	mtss-1	1.78316	yes
WBGene00012692	1.39684	2.60543e-07	9.93171e-06	yes	glp1ncl1 / glp1	Proteomics	Y39B6A.33	2.27532	yes
WBGene00007001	0.567484	2.66396e-07	9.93171e-06	yes	glp1ncl1 / glp1	Proteomics	tufm-2	1.09893	yes
WBGene00019678	2.6373	2.66842e-07	9.93171e-06	yes	glp1ncl1 / glp1	Proteomics	K12H4.3	2.21599	yes
WBGene00008393	-0.527378	2.81006e-07	1.03329e-05	yes	glp1ncl1 / glp1	Proteomics	D1086.6	-0.531262	yes
WBGene00006945	0.517819	3.18253e-07	1.15632e-05	yes	glp1ncl1 / glp1	Proteomics	wars-1	1.44876	yes
WBGene00045433	2.67365	3.68115e-07	1.32175e-05	yes	glp1ncl1 / glp1	Proteomics	F49D11.10	2.74667	yes
WBGene00017498	-2.03886	4.48299e-07	1.59094e-05	yes	glp1ncl1 / glp1	Proteomics	pud-4	-2.12821	yes
WBGene00020507	-0.370694	4.94369e-07	1.73427e-05	yes	glp1ncl1 / glp1	Proteomics	vha-15	-0.341473	yes
WBGene00011687	-1.37111	5.48618e-07	1.8822e-05	yes	glp1ncl1 / glp1	Proteomics	T10C6.5	-0.0395316	no
WBGene00012316	0.491281	5.48872e-07	1.8822e-05	yes	glp1ncl1 / glp1	Proteomics	ctps-1	1.37764	yes
WBGene00003815	0.4304	5.82914e-07	1.97673e-05	yes	glp1ncl1 / glp1	Proteomics	nars-1	1.23281	yes
WBGene00013544	2.15138	6.09345e-07	2.04365e-05	yes	glp1ncl1 / glp1	Proteomics	Y75B8A.7	2.29271	yes
WBGene00007555	0.618089	9.13394e-07	3.03009e-05	yes	glp1ncl1 / glp1	Proteomics	dohh-1,rpb-6	1.28916	yes
WBGene00022851	2.46025	9.35204e-07	3.06908e-05	yes	glp1ncl1 / glp1	Proteomics	ZK1127.4	1.99661	yes
WBGene00004437	1.12488	9.78964e-07	3.17851e-05	yes	glp1ncl1 / glp1	Proteomics	rpl-24.2	2.54631	yes
WBGene00007859	0.395602	1.00329e-06	3.2232e-05	yes	glp1ncl1 / glp1	Proteomics	mrps-31	0.852617	yes
WBGene00019619	-1.41207	1.09816e-06	3.49124e-05	yes	glp1ncl1 / glp1	Proteomics	asp-14,fah-1	-0.430552	yes
WBGene00006613	0.836245	1.17416e-06	3.67949e-05	yes	glp1ncl1 / glp1	Proteomics	trm-1	2.02736	yes
WBGene00012544	-0.435737	1.18149e-06	3.67949e-05	yes	glp1ncl1 / glp1	Proteomics	Y37D8A.2	-0.453349	yes
WBGene00000118	-0.374296	1.33857e-06	4.12659e-05	yes	glp1ncl1 / glp1	Proteomics	alh-12	-0.415628	yes
WBGene00018910	-0.745832	1.42851e-06	4.3598e-05	yes	glp1ncl1 / glp1	Proteomics	F56A4.2	-1.37081	yes
WBGene00001498	0.403936	1.62205e-06	4.90149e-05	yes	glp1ncl1 / glp1	Proteomics	fars-3	1.14919	yes
WBGene00015282	0.857797	1.80648e-06	5.35515e-05	yes	glp1ncl1 / glp1	Proteomics	C01B10.8	2.05757	yes
WBGene00011289	-0.43773	1.80728e-06	5.35515e-05	yes	glp1ncl1 / glp1	Proteomics	R102.2	-0.586544	yes
WBGene00013267	1.70476	1.84082e-06	5.40209e-05	yes	glp1ncl1 / glp1	Proteomics	Y57A10A.27	2.64346	yes
WBGene00014253	-0.764017	2.11284e-06	6.14131e-05	yes	glp1ncl1 / glp1	Proteomics	ZK1320.3	-0.552579	yes
WBGene00015025	0.540583	2.16721e-06	6.23994e-05	yes	glp1ncl1 / glp1	Proteomics	mrpl-9	1.65775	yes
WBGene00021026	1.29031	2.37812e-06	6.78318e-05	yes	glp1ncl1 / glp1	Proteomics	W04C9.4	2.80304	yes
WBGene00001977	0.464323	2.41323e-06	6.81962e-05	yes	glp1ncl1 / glp1	Proteomics	hmg-12	0.832334	yes
WBGene00022653	-1.95776	2.5578e-06	7.16184e-05	yes	glp1ncl1 / glp1	Proteomics	ZK105.1	-1.0584	yes
WBGene00005663	0.327862	2.74529e-06	7.61694e-05	yes	glp1ncl1 / glp1	Proteomics	sars-1	0.968085	yes
WBGene00002850	0.920734	2.81844e-06	7.74944e-05	yes	glp1ncl1 / glp1	Proteomics	let-716	1.58512	yes
WBGene00017490	-1.26905	3.00856e-06	8.19832e-05	yes	glp1ncl1 / glp1	Proteomics	pud-2.1	-2.01112	yes
WBGene00018866	2.50973	3.05396e-06	8.2484e-05	yes	glp1ncl1 / glp1	Proteomics	nath-10	2.73703	yes
WBGene00009796	-0.578701	3.2839e-06	8.79164e-05	yes	glp1ncl1 / glp1	Proteomics	F46G10.1	-0.749538	yes
WBGene00012858	1.51701	3.74334e-06	9.84885e-05	yes	glp1ncl1 / glp1	Proteomics	Y44F5A.1	2.24607	yes
WBGene00022642	-0.653547	3.86081e-06	0.000100711	yes	glp1ncl1 / glp1	Proteomics	lipl-5	-0.671986	yes
WBGene00023451	-0.434022	4.56652e-06	0.00011811	yes	glp1ncl1 / glp1	Proteomics	mlc-7	-0.319963	yes
WBGene00011291	-0.413314	5.54286e-06	0.000142158	yes	glp1ncl1 / glp1	Proteomics	R102.4	-0.507915	yes
WBGene00022739	1.23169	5.74107e-06	0.000146015	yes	glp1ncl1 / glp1	Proteomics	toe-1	1.27157	yes
WBGene00006921	-0.332927	6.43348e-06	0.000162085	yes	glp1ncl1 / glp1	Proteomics	vha-12	-0.350182	yes
WBGene00001775	-0.471796	6.47916e-06	0.000162085	yes	glp1ncl1 / glp1	Proteomics	gst-27	-0.418285	yes
WBGene00000877	0.430073	6.8735e-06	0.000170552	yes	glp1ncl1 / glp1	Proteomics	cyn-1	1.29351	yes
WBGene00000214	-0.680574	7.00148e-06	0.000170955	yes	glp1ncl1 / glp1	Proteomics	asp-1	-0.301527	yes
WBGene00006924	0.385094	7.00177e-06	0.000170955	yes	glp1ncl1 / glp1	Proteomics	vig-1	1.70804	yes
WBGene00003776	-0.320925	7.56324e-06	0.000183199	yes	glp1ncl1 / glp1	Proteomics	nmy-1	-0.300137	yes
WBGene00019246	0.562618	7.70964e-06	0.000185274	yes	glp1ncl1 / glp1	Proteomics	rpb-5	1.1762	yes
WBGene00006512	0.369126	8.81779e-06	0.000210249	yes	glp1ncl1 / glp1	Proteomics	abcf-1	1.09135	yes
WBGene00008205	-0.333283	9.17177e-06	0.00021618	yes	glp1ncl1 / glp1	Proteomics	sams-1	-0.137441	no
WBGene00004248	1.66724	9.20819e-06	0.00021618	yes	glp1ncl1 / glp1	Proteomics	pus-1	1.8758	yes
WBGene00012030	0.825864	9.31296e-06	0.000216971	yes	glp1ncl1 / glp1	Proteomics	T25G3.3,chs-1	2.03758	yes
WBGene00010231	2.53698	1.0691e-05	0.00024719	yes	glp1ncl1 / glp1	Proteomics	F58B3.4	1.82842	yes
WBGene00015486	4.65164	1.09011e-05	0.000250152	yes	glp1ncl1 / glp1	Proteomics	C05D11.9	1.70837	yes
WBGene00002238	0.363756	1.15266e-05	0.000262532	yes	glp1ncl1 / glp1	Proteomics	kars-1	0.918749	yes
WBGene00021789	1.46641	1.16795e-05	0.000264044	yes	glp1ncl1 / glp1	Proteomics	nol-6	2.43627	yes
WBGene00015551	-0.273812	1.36121e-05	0.000305472	yes	glp1ncl1 / glp1	Proteomics	C06G3.5	-0.363578	yes
WBGene00020171	1.49463	1.38575e-05	0.000308709	yes	glp1ncl1 / glp1	Proteomics	T02H6.1	1.87874	yes
WBGene00021276	1.42354	1.47789e-05	0.00032685	yes	glp1ncl1 / glp1	Proteomics	Y23H5B.5	2.80019	yes
WBGene00015405	1.08931	1.55116e-05	0.000339975	yes	glp1ncl1 / glp1	Proteomics	C03H5.3	1.68135	yes
WBGene00022269	1.42638	1.55952e-05	0.000339975	yes	glp1ncl1 / glp1	Proteomics	Y73E7A.2	1.29682	yes
WBGene00022178	-0.396306	1.62659e-05	0.000352082	yes	glp1ncl1 / glp1	Proteomics	Y71H2AM.13	-0.396026	yes
WBGene00016943	-0.72651	1.68723e-05	0.00036201	yes	glp1ncl1 / glp1	Proteomics	acdh-1	-0.382656	yes
WBGene00017347	2.04725	1.70321e-05	0.00036201	yes	glp1ncl1 / glp1	Proteomics	F10E7.5	2.47373	yes
WBGene00019698	1.18412	1.70804e-05	0.00036201	yes	glp1ncl1 / glp1	Proteomics	riok-1	1.26999	yes
WBGene00016740	1.15995	1.72891e-05	0.000363906	yes	glp1ncl1 / glp1	Proteomics	C48B6.2	2.42351	yes
WBGene00010260	0.447256	1.81156e-05	0.000378691	yes	glp1ncl1 / glp1	Proteomics	ddx-17	0.536801	yes
WBGene00021236	-1.16019	1.85917e-05	0.000385999	yes	glp1ncl1 / glp1	Proteomics	pud-1.2	-1.95601	yes
WBGene00017435	1.89287	1.92732e-05	0.000397445	yes	glp1ncl1 / glp1	Proteomics	F13H8.2	2.61925	yes
WBGene00000040	-0.112935	0.0347765	0.122561	no	glp1ncl1 / glp1	Proteomics	aco-1	0.0200027	no
WBGene00015116	-0.356273	2.00269e-05	0.000403803	yes	glp1ncl1 / glp1	Proteomics	B0286.3	-0.343404	yes
WBGene00007623	0.995604	2.01364e-05	0.000403803	yes	glp1ncl1 / glp1	Proteomics	C16C10.2	1.63514	yes
WBGene00045399	-0.539662	2.02308e-05	0.000403803	yes	glp1ncl1 / glp1	Proteomics	Y47G6A.33	-0.485626	yes
WBGene00002077	0.427339	2.02431e-05	0.000403803	yes	glp1ncl1 / glp1	Proteomics	C53D5.5,imb-3	0.570444	yes
WBGene00001983	0.690121	2.05313e-05	0.000406894	yes	glp1ncl1 / glp1	Proteomics	hoe-1	1.69928	yes
WBGene00009211	1.25293	2.07273e-05	0.000408128	yes	glp1ncl1 / glp1	Proteomics	wdr-46	2.26607	yes
WBGene00000597	-0.435929	2.16291e-05	0.000421382	yes	glp1ncl1 / glp1	Proteomics	col-8	-0.632699	yes
WBGene00018762	2.6168	2.16766e-05	0.000421382	yes	glp1ncl1 / glp1	Proteomics	F53E10.6	2.49793	yes
WBGene00001149	-0.357731	2.4215e-05	0.000467747	yes	glp1ncl1 / glp1	Proteomics	bcat-1	-0.252484	yes
WBGene00017749	1.18115	2.46577e-05	0.000473304	yes	glp1ncl1 / glp1	Proteomics	rpoa-49	2.22028	yes
WBGene00003130	0.422411	2.53745e-05	0.000484018	yes	glp1ncl1 / glp1	Proteomics	map-2	0.829119	yes
WBGene00020097	0.273375	2.55606e-05	0.00048454	yes	glp1ncl1 / glp1	Proteomics	larp-1	0.330586	yes
WBGene00017686	-0.355896	2.66267e-05	0.000501634	yes	glp1ncl1 / glp1	Proteomics	tpp-2	-0.107469	no
WBGene00015802	-0.402437	2.67985e-05	0.000501774	yes	glp1ncl1 / glp1	Proteomics	flu-2	-0.57043	yes
WBGene00004185	2.29747	2.70359e-05	0.000503131	yes	glp1ncl1 / glp1	Proteomics	pro-1	2.36031	yes
WBGene00021074	2.9136	2.94395e-05	0.000542175	yes	glp1ncl1 / glp1	Proteomics	W07E6.2	2.78357	yes
WBGene00018237	-0.353015	2.94892e-05	0.000542175	yes	glp1ncl1 / glp1	Proteomics	drd-2	-0.388492	yes
WBGene00015461	2.36325	2.97279e-05	0.00054329	yes	glp1ncl1 / glp1	Proteomics	C05C8.2	2.31035	yes
WBGene00000392	-0.442611	3.00412e-05	0.000545748	yes	glp1ncl1 / glp1	Proteomics	cdd-2	-0.519314	no
WBGene00022373	0.408939	3.06066e-05	0.000552731	yes	glp1ncl1 / glp1	Proteomics	mrpl-15	1.05309	yes
WBGene00001430	0.526371	3.3015e-05	0.000592717	yes	glp1ncl1 / glp1	Proteomics	fkb-5	1.43005	yes
WBGene00000219	-0.439759	3.47422e-05	0.000617043	yes	glp1ncl1 / glp1	Proteomics	asp-6	-0.0395705	no
WBGene00000216	-0.585248	3.48412e-05	0.000617043	yes	glp1ncl1 / glp1	Proteomics	asp-3	-0.322631	yes
WBGene00019261	-0.371562	3.49766e-05	0.000617043	yes	glp1ncl1 / glp1	Proteomics	H34I24.2	-0.437515	yes
WBGene00014173	1.13341	3.53447e-05	0.000619953	yes	glp1ncl1 / glp1	Proteomics	ZK970.7	0.84552	yes
WBGene00001337	0.266921	3.63424e-05	0.000633812	yes	glp1ncl1 / glp1	Proteomics	ears-1	0.851596	yes
WBGene00003119	2.36127	3.78351e-05	0.000656096	yes	glp1ncl1 / glp1	Proteomics	mac-1	2.46368	yes
WBGene00012361	0.403832	3.87221e-05	0.000666743	yes	glp1ncl1 / glp1	Proteomics	mrpl-12	1.19764	yes
WBGene00012652	2.01677	3.8886e-05	0.000666743	yes	glp1ncl1 / glp1	Proteomics	Y39A1A.14	2.73916	yes
WBGene00010456	-0.375964	3.94898e-05	0.000673311	yes	glp1ncl1 / glp1	Proteomics	K01C8.1	-0.445556	yes
WBGene00015713	-0.301484	4.01229e-05	0.000677212	yes	glp1ncl1 / glp1	Proteomics	C12D12.1	-0.474043	yes
WBGene00006574	0.317781	4.01623e-05	0.000677212	yes	glp1ncl1 / glp1	Proteomics	tin-13	0.459839	yes
WBGene00009952	-0.252191	4.18201e-05	0.000700388	yes	glp1ncl1 / glp1	Proteomics	acaa-2	-0.267084	yes
WBGene00003059	1.38185	4.19957e-05	0.000700388	yes	glp1ncl1 / glp1	Proteomics	lpd-2	2.18915	yes
WBGene00006408	-0.265764	4.2881e-05	0.000711265	yes	glp1ncl1 / glp1	Proteomics	tag-18	-0.440931	yes
WBGene00014244	-0.471824	4.45839e-05	0.000735513	yes	glp1ncl1 / glp1	Proteomics	ZK1307.1	-0.67403	yes
WBGene00018823	-0.531315	4.58553e-05	0.000752422	yes	glp1ncl1 / glp1	Proteomics	F54E2.1	-0.59787	yes
WBGene00018961	0.423678	4.97025e-05	0.000811187	yes	glp1ncl1 / glp1	Proteomics	F56D1.2,mrps-16	0.357536	yes
WBGene00017159	0.324466	5.05145e-05	0.000816239	yes	glp1ncl1 / glp1	Proteomics	F01F1.2	0.22225	no
WBGene00006781	0.335805	5.05682e-05	0.000816239	yes	glp1ncl1 / glp1	Proteomics	unc-45	0.519523	yes
WBGene00021327	0.432322	5.08144e-05	0.000816239	yes	glp1ncl1 / glp1	Proteomics	mrpl-38	1.35117	yes
WBGene00015185	0.362029	5.24138e-05	0.000837165	yes	glp1ncl1 / glp1	Proteomics	mrpl-41	1.18351	yes
WBGene00011247	0.508406	5.26657e-05	0.000837165	yes	glp1ncl1 / glp1	Proteomics	mrpl-49	1.13192	yes
WBGene00008452	0.431675	5.54802e-05	0.000877334	yes	glp1ncl1 / glp1	Proteomics	mrps-5	0.892886	yes
WBGene00016011	-0.348922	5.66695e-05	0.000891522	yes	glp1ncl1 / glp1	Proteomics	C23G10.2,rps-3	#N/A	#N/A
WBGene00015538	0.713428	5.95137e-05	0.000931465	yes	glp1ncl1 / glp1	Proteomics	sams-3	1.32881	yes
WBGene00022363	0.740781	6.19609e-05	0.000964819	yes	glp1ncl1 / glp1	Proteomics	Y92H12BL.1	1.76448	yes
WBGene00044321	0.460921	6.23746e-05	0.000966332	yes	glp1ncl1 / glp1	Proteomics	mrps-30	0.826816	yes
WBGene00000155	-0.274727	6.77691e-05	0.0010446	yes	glp1ncl1 / glp1	Proteomics	app-1	-0.284235	yes
WBGene00010905	0.457707	7.57483e-05	0.00116173	yes	glp1ncl1 / glp1	Proteomics	mrps-34	1.2006	yes
WBGene00002016	2.15095	7.71922e-05	0.00117795	yes	glp1ncl1 / glp1	Proteomics	hsp-16.2	1.52731	yes
WBGene00022173	0.605712	7.96932e-05	0.00121007	yes	glp1ncl1 / glp1	Proteomics	set-27	0.768752	yes
WBGene00003738	-0.362041	8.41845e-05	0.00127194	yes	glp1ncl1 / glp1	Proteomics	nid-1	-0.3928	yes
WBGene00010040	-0.390001	8.70473e-05	0.0013079	yes	glp1ncl1 / glp1	Proteomics	F54C8.7	-0.288055	no
WBGene00022378	1.99858	8.75587e-05	0.0013079	yes	glp1ncl1 / glp1	Proteomics	Y94H6A.5	2.38262	yes
WBGene00000831	-0.32433	8.78502e-05	0.0013079	yes	glp1ncl1 / glp1	Proteomics	ctl-2	-0.540762	yes
WBGene00015565	-0.317196	8.8311e-05	0.00130838	yes	glp1ncl1 / glp1	Proteomics	C07D8.6	-0.34161	yes
WBGene00011122	-0.229175	8.95489e-05	0.0013203	yes	glp1ncl1 / glp1	Proteomics	cpt-2	-0.278508	yes
WBGene00004076	-0.307683	9.57226e-05	0.00140455	yes	glp1ncl1 / glp1	Proteomics	pod-2	-0.482814	yes
WBGene00000081	-0.24075	0.00629054	0.0349703	yes	glp1ncl1 / glp1	Proteomics	ads-1	0.0760699	no
WBGene00008390	-0.724305	9.9934e-05	0.00145237	yes	glp1ncl1 / glp1	Proteomics	D1086.3	-1.04228	yes
WBGene00021401	0.471304	0.000100915	0.00145968	yes	glp1ncl1 / glp1	Proteomics	prdx-6	1.20588	yes
WBGene00000713	-0.42789	0.000101742	0.0014647	yes	glp1ncl1 / glp1	Proteomics	col-140	-0.288889	no
WBGene00018488	-0.2711	0.000102263	0.00146529	yes	glp1ncl1 / glp1	Proteomics	acs-1	-0.409645	yes
WBGene00010055	-0.283415	0.000103734	0.0014716	yes	glp1ncl1 / glp1	Proteomics	F54D5.12	-0.531601	yes
WBGene00003091	-0.841016	0.000103911	0.0014716	yes	glp1ncl1 / glp1	Proteomics	lys-2	-0.621125	yes
WBGene00000964	0.384527	0.00010415	0.0014716	yes	glp1ncl1 / glp1	Proteomics	dhp-2	0.643618	yes
WBGene00012253	-0.607536	0.00010509	0.00147805	yes	glp1ncl1 / glp1	Proteomics	clec-50	-0.619579	yes
WBGene00007564	0.405198	0.000109965	0.00153951	yes	glp1ncl1 / glp1	Proteomics	mrps-22	1.25689	yes
WBGene00013004	0.428938	0.000115698	0.00161237	yes	glp1ncl1 / glp1	Proteomics	mrpl-37	0.997899	yes
WBGene00014030	-0.86938	0.000116763	0.00161982	yes	glp1ncl1 / glp1	Proteomics	glb-1	-0.955574	yes
WBGene00011032	1.49446	0.000118482	0.00163623	yes	glp1ncl1 / glp1	Proteomics	R05D11.4,paxt-1	1.31836	yes
WBGene00019617	-0.330384	0.00012214	0.00167914	yes	glp1ncl1 / glp1	Proteomics	K10C2.1	-0.21064	no
WBGene00019682	-0.400277	0.000127073	0.00173447	yes	glp1ncl1 / glp1	Proteomics	K12H4.7	-0.268014	yes
WBGene00017989	1.02315	0.000127301	0.00173447	yes	glp1ncl1 / glp1	Proteomics	nol-10	1.8988	yes
WBGene00019351	-0.419396	0.000134262	0.00181493	yes	glp1ncl1 / glp1	Proteomics	lron-7	-0.327517	yes
WBGene00019333	-0.297927	0.000134395	0.00181493	yes	glp1ncl1 / glp1	Proteomics	moma-1	-0.189034	no
WBGene00013151	2.12853	0.000136015	0.00182871	yes	glp1ncl1 / glp1	Proteomics	nsun-5	2.49727	yes
WBGene00008688	1.47652	0.000137816	0.0018448	yes	glp1ncl1 / glp1	Proteomics	F11A10.7	2.17022	yes
WBGene00006919	-0.314116	0.000138707	0.00184862	yes	glp1ncl1 / glp1	Proteomics	vha-10	-0.300166	yes
WBGene00000680	-0.483123	0.000139582	0.0018522	yes	glp1ncl1 / glp1	Proteomics	col-106	-0.44853	yes
WBGene00001151	0.390139	0.000142589	0.0018839	yes	glp1ncl1 / glp1	Proteomics	ech-2,tag-30	0.558883	yes
WBGene00022493	0.485621	0.000147913	0.00194582	yes	glp1ncl1 / glp1	Proteomics	mrpl-45	1.68875	yes
WBGene00010988	0.779687	0.00014985	0.00196285	yes	glp1ncl1 / glp1	Proteomics	metr-1	0.36111	yes
WBGene00003818	-0.257114	0.000154797	0.00201898	yes	glp1ncl1 / glp1	Proteomics	nsf-1	-0.0340147	no
WBGene00008341	-0.530213	0.000164229	0.00213288	yes	glp1ncl1 / glp1	Proteomics	ttr-44	-0.621375	yes
WBGene00005002	-0.713792	0.000168497	0.00217903	yes	glp1ncl1 / glp1	Proteomics	spp-17	-0.549805	yes
WBGene00012097	0.353721	0.00017535	0.0022581	yes	glp1ncl1 / glp1	Proteomics	abcf-2	1.59474	yes
WBGene00010435	1.84642	0.000183782	0.00235674	yes	glp1ncl1 / glp1	Proteomics	JC8.2	2.49068	yes
WBGene00006942	-0.304511	0.000188608	0.0024085	yes	glp1ncl1 / glp1	Proteomics	wrk-1	-0.149016	no
WBGene00013200	0.471218	0.000197766	0.00251319	yes	glp1ncl1 / glp1	Proteomics	Y54E5A.5	1.6288	yes
WBGene00013735	1.35814	0.000198453	0.00251319	yes	glp1ncl1 / glp1	Proteomics	Y111B2A.12	1.63252	yes
WBGene00021829	0.366997	0.000201475	0.00254092	yes	glp1ncl1 / glp1	Proteomics	mrpl-17	0.450733	yes
WBGene00018339	0.289801	0.000206013	0.00258745	yes	glp1ncl1 / glp1	Proteomics	abcf-3	1.03525	yes
WBGene00021697	0.256	0.000210804	0.00262826	yes	glp1ncl1 / glp1	Proteomics	gcn-1	0.882087	yes
WBGene00001234	0.666938	0.000211383	0.00262826	yes	glp1ncl1 / glp1	Proteomics	eif-6	1.65798	yes
WBGene00020110	0.36655	0.000211845	0.00262826	yes	glp1ncl1 / glp1	Proteomics	R151.8,hsp-75	1.05526	yes
WBGene00008458	0.605123	0.000216339	0.00267315	yes	glp1ncl1 / glp1	Proteomics	E02H1.6	2.13329	yes
WBGene00013958	2.84623	0.00022057	0.00271443	yes	glp1ncl1 / glp1	Proteomics	ZK265.6	2.78112	yes
WBGene00018674	0.435866	0.000224132	0.0027472	yes	glp1ncl1 / glp1	Proteomics	F52C9.3	1.51892	yes
WBGene00007101	1.55448	0.000232869	0.00282553	yes	glp1ncl1 / glp1	Proteomics	B0024.11	1.76231	yes
WBGene00010780	-0.357633	0.000233536	0.00282553	yes	glp1ncl1 / glp1	Proteomics	K11H3.3	-0.352203	yes
WBGene00009246	0.287243	0.000234039	0.00282553	yes	glp1ncl1 / glp1	Proteomics	gfm-1	1.37323	yes
WBGene00022856	-0.46199	0.000234848	0.00282553	yes	glp1ncl1 / glp1	Proteomics	cth-2	-0.551225	yes
WBGene00007712	0.396454	0.000235951	0.00282553	yes	glp1ncl1 / glp1	Proteomics	mrpl-34	1.26229	yes
WBGene00013394	-0.564712	0.000236078	0.00282553	yes	glp1ncl1 / glp1	Proteomics	Y62H9A.6	-0.476357	yes
WBGene00010084	-0.60284	0.000237268	0.00282868	yes	glp1ncl1 / glp1	Proteomics	F55B11.2	-0.436331	yes
WBGene00017771	-0.727766	0.000244481	0.00290333	yes	glp1ncl1 / glp1	Proteomics	F25B4.8	-0.615471	yes
WBGene00002074	0.372086	0.000246274	0.00291329	yes	glp1ncl1 / glp1	Proteomics	ima-3	0.429165	yes
WBGene00017319	0.238282	0.000250464	0.00295142	yes	glp1ncl1 / glp1	Proteomics	mrps-9	0.919162	yes
WBGene00022245	-0.486717	0.000252899	0.00296864	yes	glp1ncl1 / glp1	Proteomics	acp-6	-0.694909	yes
WBGene00000098	-0.753978	0.00552835	0.0319559	yes	glp1ncl1 / glp1	Proteomics	air-1	0.881788	yes
WBGene00007312	2.71762	0.000262136	0.00305359	yes	glp1ncl1 / glp1	Proteomics	C04H5.1	1.63232	yes
WBGene00001230	0.308099	0.000265426	0.00308015	yes	glp1ncl1 / glp1	Proteomics	eif-3.G	0.907848	yes
WBGene00015509	-0.360622	0.000269616	0.00311692	yes	glp1ncl1 / glp1	Proteomics	C06A6.4	-0.462086	yes
WBGene00020369	-0.331415	0.000288274	0.00332005	yes	glp1ncl1 / glp1	Proteomics	T08H10.1	-0.338394	yes
WBGene00013324	0.370738	0.000296674	0.0034012	yes	glp1ncl1 / glp1	Proteomics	mrps-7	0.957709	yes
WBGene00016142	0.33375	0.000297549	0.0034012	yes	glp1ncl1 / glp1	Proteomics	mrps-18C	1.28201	yes
WBGene00013297	-0.680538	0.000300516	0.0034173	yes	glp1ncl1 / glp1	Proteomics	Y57G11B.5	-0.536516	yes
WBGene00000991	-0.262108	0.000301197	0.0034173	yes	glp1ncl1 / glp1	Proteomics	dhs-28	-0.157067	no
WBGene00020718	0.341991	0.000304071	0.00343713	yes	glp1ncl1 / glp1	Proteomics	mrps-2	0.68723	yes
WBGene00006573	0.398889	0.000309813	0.00348911	yes	glp1ncl1 / glp1	Proteomics	tin-10	0.896522	yes
WBGene00000109	-0.0337639	0.55748	0.728663	no	glp1ncl1 / glp1	Proteomics	alh-3	0.0660349	no
WBGene00003769	4.18142	0.000323169	0.00360041	yes	glp1ncl1 / glp1	Proteomics	nlp-31	0.334519	no
WBGene00014120	1.80088	0.000323235	0.00360041	yes	glp1ncl1 / glp1	Proteomics	ZK858.7	2.03412	yes
WBGene00004999	-0.452983	0.000325111	0.00360814	yes	glp1ncl1 / glp1	Proteomics	spp-14	-0.536572	yes
WBGene00009396	-0.897329	0.000334214	0.00369573	yes	glp1ncl1 / glp1	Proteomics	clec-65	-0.540943	yes
WBGene00008781	1.07336	0.000339941	0.00374549	yes	glp1ncl1 / glp1	Proteomics	rpoa-2	2.51962	yes
WBGene00044318	2.07742	0.000344672	0.00378395	yes	glp1ncl1 / glp1	Proteomics	tag-267	2.69391	yes
WBGene00012123	-0.494317	0.000349451	0.00382267	yes	glp1ncl1 / glp1	Proteomics	T28D6.3	-0.72648	yes
WBGene00021813	0.257447	0.000355596	0.003876	yes	glp1ncl1 / glp1	Proteomics	Y53G8AR.6	0.483487	yes
WBGene00016659	0.508364	0.000362353	0.00393559	yes	glp1ncl1 / glp1	Proteomics	C45B2.2	1.03468	yes
WBGene00000976	0.264291	0.00036741	0.00397495	yes	glp1ncl1 / glp1	Proteomics	dhs-13	-0.1011	no
WBGene00009013	0.279989	0.000368582	0.00397495	yes	glp1ncl1 / glp1	Proteomics	mrps-33	0.997737	yes
WBGene00009688	-0.454904	0.000373602	0.00400113	yes	glp1ncl1 / glp1	Proteomics	F44E5.1	-0.00791054	no
WBGene00015104	1.6107	0.000373631	0.00400113	yes	glp1ncl1 / glp1	Proteomics	B0280.9	2.25529	yes
WBGene00010117	-0.383473	0.000387801	0.00413835	yes	glp1ncl1 / glp1	Proteomics	nkb-3	-0.342314	yes
WBGene00012722	-0.235915	0.000391145	0.0041595	yes	glp1ncl1 / glp1	Proteomics	Y39G8B.1	-0.263459	yes
WBGene00004679	0.208312	0.000397196	0.00420918	yes	glp1ncl1 / glp1	Proteomics	rars-1	0.438311	no
WBGene00016844	0.264719	0.000402466	0.00425027	yes	glp1ncl1 / glp1	Proteomics	sucg-1	0.711985	yes
WBGene00021660	1.87346	0.000405415	0.00426665	yes	glp1ncl1 / glp1	Proteomics	Y48G1A.4	2.31745	yes
WBGene00022864	0.491261	0.000409494	0.00429476	yes	glp1ncl1 / glp1	Proteomics	ZK1236.5	0.380539	no
WBGene00011979	-1.14976	0.000425388	0.00444617	yes	glp1ncl1 / glp1	Proteomics	T24B8.5	-0.87502	yes
WBGene00021595	1.15965	0.000427977	0.00445727	yes	glp1ncl1 / glp1	Proteomics	Y46E12BL.2	1.46656	yes
WBGene00016655	-0.330467	0.000430011	0.00445727	yes	glp1ncl1 / glp1	Proteomics	acbp-1	-0.301375	yes
WBGene00004033	-0.407057	0.000430831	0.00445727	yes	glp1ncl1 / glp1	Proteomics	pkc-2	-0.356757	yes
WBGene00000609	-0.707262	0.000443083	0.00456855	yes	glp1ncl1 / glp1	Proteomics	col-20	-0.453795	yes
WBGene00016134	-0.36303	0.000446551	0.0045888	yes	glp1ncl1 / glp1	Proteomics	C26B9.5	-0.391061	yes
WBGene00019957	-0.393591	0.000453268	0.0046422	yes	glp1ncl1 / glp1	Proteomics	R08E3.1	-0.415334	yes
WBGene00012768	0.288142	0.000476475	0.00486356	yes	glp1ncl1 / glp1	Proteomics	Y41E3.11,eef-1B.2	0.553951	yes
WBGene00014083	1.80845	0.000480347	0.00488673	yes	glp1ncl1 / glp1	Proteomics	ZK795.3	2.52314	yes
WBGene00002025	0.219721	0.000483589	0.00490337	yes	glp1ncl1 / glp1	Proteomics	hsp-60	0.687285	yes
WBGene00022235	0.273414	0.000485572	0.00490717	yes	glp1ncl1 / glp1	Proteomics	sqd-1	0.988862	yes
WBGene00002083	0.246617	0.000495601	0.00499199	yes	glp1ncl1 / glp1	Proteomics	inf-1	0.768733	yes
WBGene00020831	-0.329828	0.000527086	0.00528089	yes	glp1ncl1 / glp1	Proteomics	T26C12.1	-0.359436	yes
WBGene00012465	1.83293	0.000528639	0.00528089	yes	glp1ncl1 / glp1	Proteomics	Y17G7B.12,glb-29	2.22249	yes
WBGene00010279	-0.301403	0.000529473	0.00528089	yes	glp1ncl1 / glp1	Proteomics	letm-1	-0.207264	no
WBGene00012018	-0.313724	0.000534353	0.0053122	yes	glp1ncl1 / glp1	Proteomics	T25C12.3	-0.432338	yes
WBGene00002045	0.29662	0.000546619	0.0054165	yes	glp1ncl1 / glp1	Proteomics	C56C10.7,icd-1	0.953922	yes
WBGene00011110	-0.287251	0.000550034	0.0054327	yes	glp1ncl1 / glp1	Proteomics	prdx-3	-0.215917	no
WBGene00007194	2.11732	0.000569107	0.00560295	yes	glp1ncl1 / glp1	Proteomics	B0491.1,B0491.7	1.83031	yes
WBGene00009126	-0.322513	0.000585267	0.00572554	yes	glp1ncl1 / glp1	Proteomics	pyk-1	-0.381123	yes
WBGene00001099	-0.379912	0.000585311	0.00572554	yes	glp1ncl1 / glp1	Proteomics	dsc-4	-0.497105	yes
WBGene00006617	0.298666	0.000607282	0.00591144	yes	glp1ncl1 / glp1	Proteomics	tars-1	0.773577	yes
WBGene00010911	-0.368334	0.000608639	0.00591144	yes	glp1ncl1 / glp1	Proteomics	M106.3	-0.340287	yes
WBGene00008394	-0.473631	0.000610126	0.00591144	yes	glp1ncl1 / glp1	Proteomics	D1086.7	-0.336516	yes
WBGene00013079	0.637366	0.000615753	0.00593649	yes	glp1ncl1 / glp1	Proteomics	ttr-26	0.61206	yes
WBGene00003834	0.403046	0.000616601	0.00593649	yes	glp1ncl1 / glp1	Proteomics	nxf-1	0.124901	no
WBGene00020268	-0.429683	0.000633437	0.00607941	yes	glp1ncl1 / glp1	Proteomics	hpo-19	-0.414125	yes
WBGene00012600	0.3925	0.000646424	0.00618459	yes	glp1ncl1 / glp1	Proteomics	Y38E10A.22	0.208357	no
WBGene00021377	0.375275	0.000683663	0.00651091	yes	glp1ncl1 / glp1	Proteomics	Y37E11B.5	1.54402	yes
WBGene00000202	1.12773	0.000684797	0.00651091	yes	glp1ncl1 / glp1	Proteomics	exos-4.2	1.12567	yes
WBGene00006861	-0.435771	0.000693549	0.00657364	yes	glp1ncl1 / glp1	Proteomics	cal-5	-0.69493	yes
WBGene00020917	-0.513471	0.00070208	0.00663389	yes	glp1ncl1 / glp1	Proteomics	W01B11.6	-0.522886	yes
WBGene00012364	-0.385724	0.000705623	0.0066468	yes	glp1ncl1 / glp1	Proteomics	W09D12.1	-0.129876	no
WBGene00013025	-0.282559	0.000741794	0.00694943	yes	glp1ncl1 / glp1	Proteomics	Y49A3A.3,vha-13	-0.228753	no
WBGene00015955	-0.426686	0.000742305	0.00694943	yes	glp1ncl1 / glp1	Proteomics	C18B2.4	-0.205706	no
WBGene00011740	0.470446	0.000757541	0.00707038	yes	glp1ncl1 / glp1	Proteomics	mrpl-51	0.712838	yes
WBGene00016977	0.352837	0.000779457	0.00725275	yes	glp1ncl1 / glp1	Proteomics	akap-1	0.224305	no
WBGene00006917	-0.227313	0.000798431	0.00740303	yes	glp1ncl1 / glp1	Proteomics	vha-8	-0.320991	yes
WBGene00001227	0.261875	0.000800594	0.00740303	yes	glp1ncl1 / glp1	Proteomics	eif-3.D	0.763536	yes
WBGene00006493	-0.300079	0.000802884	0.00740303	yes	glp1ncl1 / glp1	Proteomics	tag-147	-0.399134	yes
WBGene00001038	-0.239296	0.00081037	0.00744954	yes	glp1ncl1 / glp1	Proteomics	dnj-20	-0.0674169	no
WBGene00004981	-0.378503	0.00081502	0.0074698	yes	glp1ncl1 / glp1	Proteomics	spl-1	-0.43377	yes
WBGene00007533	-0.547118	0.000823476	0.00752469	yes	glp1ncl1 / glp1	Proteomics	cbl-1	-0.694256	yes
WBGene00001155	-0.267454	0.00084613	0.00770374	yes	glp1ncl1 / glp1	Proteomics	ech-6	-0.269546	yes
WBGene00020662	-0.381746	0.000848118	0.00770374	yes	glp1ncl1 / glp1	Proteomics	T21H3.1	-0.281484	yes
WBGene00008262	-0.316768	0.000855202	0.00774504	yes	glp1ncl1 / glp1	Proteomics	ril-1	-0.089375	no
WBGene00001497	0.272503	0.00086123	0.00777655	yes	glp1ncl1 / glp1	Proteomics	fars-1	0.867187	yes
WBGene00021647	-0.320328	0.000878263	0.00790696	yes	glp1ncl1 / glp1	Proteomics	Y47G6A.22	-0.311895	yes
WBGene00009084	1.14677	0.000885843	0.00795175	yes	glp1ncl1 / glp1	Proteomics	F23B12.7	1.90688	yes
WBGene00000608	-0.436554	0.000908608	0.00813218	yes	glp1ncl1 / glp1	Proteomics	col-19	-0.351828	yes
WBGene00012608	-0.274329	0.000911278	0.00813222	yes	glp1ncl1 / glp1	Proteomics	Y38F1A.6	-0.317049	yes
WBGene00011730	0.788222	0.000945542	0.00841339	yes	glp1ncl1 / glp1	Proteomics	drr-2	1.07182	yes
WBGene00002258	-0.216219	0.000948468	0.0084149	yes	glp1ncl1 / glp1	Proteomics	lbp-6	-0.254691	yes
WBGene00000788	-0.44491	0.000971811	0.00859701	yes	glp1ncl1 / glp1	Proteomics	cpz-1	-0.415742	yes
WBGene00000209	-2.21321	0.000977233	0.00860138	yes	glp1ncl1 / glp1	Proteomics	asg-1	-0.100794	no
WBGene00007942	-0.273624	0.000983124	0.00860138	yes	glp1ncl1 / glp1	Proteomics	idh-2	-0.270983	yes
WBGene00021646	-0.264734	0.000984829	0.00860138	yes	glp1ncl1 / glp1	Proteomics	Y47G6A.21	-0.0292007	no
WBGene00013284	-0.263294	0.000985801	0.00860138	yes	glp1ncl1 / glp1	Proteomics	daf-22	-0.194819	no
WBGene00012834	-0.36592	0.000986397	0.00860138	yes	glp1ncl1 / glp1	Proteomics	Y43F8C.13	-0.426052	yes
WBGene00000380	0.217285	0.00100549	0.00874291	yes	glp1ncl1 / glp1	Proteomics	cct-5	0.834692	yes
WBGene00016148	1.4063	0.0010171	0.00881871	yes	glp1ncl1 / glp1	Proteomics	C26F1.3	0.93888	yes
WBGene00009081	-0.305654	0.00102077	0.00882547	yes	glp1ncl1 / glp1	Proteomics	F23B12.4	-0.105523	no
WBGene00002335	-0.283323	0.00103977	0.00896437	yes	glp1ncl1 / glp1	Proteomics	let-60	-0.074103	no
WBGene00017772	-1.44165	0.0010508	0.00903389	yes	glp1ncl1 / glp1	Proteomics	clec-1	-0.341701	yes
WBGene00012929	0.375159	0.00107513	0.00921709	yes	glp1ncl1 / glp1	Proteomics	rsks-1	0.353542	yes
WBGene00000114	-0.097293	0.0784478	0.217459	no	glp1ncl1 / glp1	Proteomics	alh-8	0.126785	no
WBGene00013392	-0.483192	0.00108605	0.00925869	yes	glp1ncl1 / glp1	Proteomics	Y62H9A.4	-0.610776	yes
WBGene00013892	1.3213	0.00109131	0.00927762	yes	glp1ncl1 / glp1	Proteomics	ZC434.4	2.33115	yes
WBGene00015010	-0.447403	0.0011059	0.00937557	yes	glp1ncl1 / glp1	Proteomics	ptps-1	-0.58452	yes
WBGene00014251	-0.453722	0.00111053	0.00938873	yes	glp1ncl1 / glp1	Proteomics	gstk-1	-0.765466	yes
WBGene00022276	-0.406284	0.00111728	0.0094197	yes	glp1ncl1 / glp1	Proteomics	nlp-40	-0.39635	yes
WBGene00010624	0.276489	0.00112331	0.0094445	yes	glp1ncl1 / glp1	Proteomics	mrps-15	0.708443	yes
WBGene00007786	-0.209748	0.00114614	0.00959925	yes	glp1ncl1 / glp1	Proteomics	rmd-2	-0.273853	yes
WBGene00044344	0.35651	0.00114801	0.00959925	yes	glp1ncl1 / glp1	Proteomics	mrpl-39	1.62854	yes
WBGene00013690	-0.292654	0.00115883	0.00966322	yes	glp1ncl1 / glp1	Proteomics	hprt-1	-0.172527	no
WBGene00021277	1.40855	0.00116628	0.00969888	yes	glp1ncl1 / glp1	Proteomics	Y23H5B.6	1.7574	yes
WBGene00000379	0.220031	0.00117141	0.00971505	yes	glp1ncl1 / glp1	Proteomics	cct-4	0.652713	yes
WBGene00012697	0.248268	0.00119632	0.00989478	yes	glp1ncl1 / glp1	Proteomics	mrps-35	0.438674	yes
WBGene00017591	-0.374748	0.00123216	0.0101637	yes	glp1ncl1 / glp1	Proteomics	F19C7.1	-0.379804	yes
WBGene00017123	-0.298668	0.0012449	0.0102171	yes	glp1ncl1 / glp1	Proteomics	maoc-1	-0.193183	no
WBGene00016630	0.277498	0.00124533	0.0102171	yes	glp1ncl1 / glp1	Proteomics	acer-1	0.469536	yes
WBGene00013393	-0.562121	0.0012538	0.010259	yes	glp1ncl1 / glp1	Proteomics	Y62H9A.5	-0.427519	yes
WBGene00017881	-0.387983	0.00129326	0.0105355	yes	glp1ncl1 / glp1	Proteomics	asp-13	-0.204203	no
WBGene00001564	0.27629	0.0012945	0.0105355	yes	glp1ncl1 / glp1	Proteomics	icl-1	-0.0238168	no
WBGene00000207	-0.252973	0.00129843	0.0105393	yes	glp1ncl1 / glp1	Proteomics	asb-2	-0.033753	no
WBGene00001914	-0.503975	0.00130776	0.0105869	yes	glp1ncl1 / glp1	Proteomics	his-40	-0.587126	no
WBGene00013144	1.57338	0.00132719	0.0107158	yes	glp1ncl1 / glp1	Proteomics	Y53C12B.2	1.33887	yes
WBGene00013143	1.49706	0.00134103	0.010799	yes	glp1ncl1 / glp1	Proteomics	Y53C12B.1	1.88361	yes
WBGene00010065	-0.564478	0.00135848	0.0109108	yes	glp1ncl1 / glp1	Proteomics	F54F7.3	-0.425404	yes
WBGene00001226	0.253771	0.00137029	0.0109767	yes	glp1ncl1 / glp1	Proteomics	eif-3.C	0.616351	yes
WBGene00000240	-0.270143	0.00140063	0.011155	yes	glp1ncl1 / glp1	Proteomics	pah-1	-0.323438	yes
WBGene00006351	-0.302587	0.00140183	0.011155	yes	glp1ncl1 / glp1	Proteomics	sur-5	-0.437415	yes
WBGene00015913	-0.441036	0.00140351	0.011155	yes	glp1ncl1 / glp1	Proteomics	C17F4.7	-0.586173	yes
WBGene00003415	0.278064	0.00142508	0.0112413	yes	glp1ncl1 / glp1	Proteomics	mars-1	0.950631	yes
WBGene00015780	-0.302858	0.00142726	0.0112413	yes	glp1ncl1 / glp1	Proteomics	C14F11.4	-0.350429	yes
WBGene00013391	-0.578105	0.00142815	0.0112413	yes	glp1ncl1 / glp1	Proteomics	Y62H9A.3	-0.647655	yes
WBGene00019895	-0.267765	0.0014304	0.0112413	yes	glp1ncl1 / glp1	Proteomics	aagr-2	-0.263915	yes
WBGene00018174	-0.328719	0.00143279	0.0112413	yes	glp1ncl1 / glp1	Proteomics	F38B6.4	-0.38081	yes
WBGene00013671	-0.261475	0.00144532	0.0113105	yes	glp1ncl1 / glp1	Proteomics	Y105E8A.11	-0.123136	no
WBGene00004988	-0.40332	0.00145673	0.0113707	yes	glp1ncl1 / glp1	Proteomics	spp-3	-0.350026	yes
WBGene00010638	0.796228	0.00147201	0.0114606	yes	glp1ncl1 / glp1	Proteomics	K07F5.14	2.22559	yes
WBGene00008865	-0.263748	0.00147903	0.011486	yes	glp1ncl1 / glp1	Proteomics	F15G9.1	-0.36353	yes
WBGene00001396	-0.555055	0.00148956	0.0115384	yes	glp1ncl1 / glp1	Proteomics	fat-4	-0.0345658	no
WBGene00010383	-0.23025	0.00149408	0.0115441	yes	glp1ncl1 / glp1	Proteomics	mpst-3	-0.291285	no
WBGene00000121	-1.00266	0.0551569	0.170107	no	glp1ncl1 / glp1	Proteomics	aly-2	0.6592	yes
WBGene00009918	-0.25311	0.00151355	0.0116357	yes	glp1ncl1 / glp1	Proteomics	F52A8.5	-0.262244	no
WBGene00017968	-0.288707	0.00152064	0.0116608	yes	glp1ncl1 / glp1	Proteomics	skpo-3	-0.357856	yes
WBGene00000776	-0.369809	0.00153317	0.0117274	yes	glp1ncl1 / glp1	Proteomics	cpl-1	-0.323404	yes
WBGene00021248	0.187747	0.00159162	0.012144	yes	glp1ncl1 / glp1	Proteomics	Y22D7AL.10	0.549509	yes
WBGene00016535	-0.262501	0.00159742	0.012158	yes	glp1ncl1 / glp1	Proteomics	C39D10.8	-0.349777	yes
WBGene00016913	0.162026	0.00161568	0.0122663	yes	glp1ncl1 / glp1	Proteomics	lam-2	0.435571	yes
WBGene00020679	-0.186434	0.00164309	0.0124434	yes	glp1ncl1 / glp1	Proteomics	ogdh-1	-0.05798	no
WBGene00002075	2.19157	0.00166666	0.0125907	yes	glp1ncl1 / glp1	Proteomics	imb-1	0.0791337	no
WBGene00004271	-0.36238	0.00167602	0.0126301	yes	glp1ncl1 / glp1	Proteomics	rab-7	-0.0746445	no
WBGene00000150	-0.19282	0.256904	0.466623	no	glp1ncl1 / glp1	Proteomics	apm-1	0.0980666	no
WBGene00020511	-0.177652	0.00174875	0.0131135	yes	glp1ncl1 / glp1	Proteomics	immt-1	-0.224717	no
WBGene00003891	-0.672553	0.00178949	0.0133861	yes	glp1ncl1 / glp1	Proteomics	osm-11	-0.411537	yes
WBGene00018656	-0.359262	0.00180708	0.0134846	yes	glp1ncl1 / glp1	Proteomics	F49H12.5	-0.242557	no
WBGene00000102	-0.408594	0.00181153	0.0134849	yes	glp1ncl1 / glp1	Proteomics	akt-1	-0.310727	no
WBGene00021930	0.19969	0.00183375	0.0136171	yes	glp1ncl1 / glp1	Proteomics	Y55F3AM.13	0.782661	yes
WBGene00022717	-0.264628	0.00188769	0.013955	yes	glp1ncl1 / glp1	Proteomics	hipr-1	-0.0734332	no
WBGene00012615	-0.286162	0.00189641	0.013955	yes	glp1ncl1 / glp1	Proteomics	dct-16	-0.411209	yes
WBGene00021514	1.44944	0.00189845	0.013955	yes	glp1ncl1 / glp1	Proteomics	Y41D4B.11	2.18846	yes
WBGene00011891	-0.333618	0.00189891	0.013955	yes	glp1ncl1 / glp1	Proteomics	del-6	-0.305834	yes
WBGene00001336	0.19024	0.00190212	0.013955	yes	glp1ncl1 / glp1	Proteomics	qars-1	0.821548	yes
WBGene00017892	-0.264832	0.00190879	0.0139627	yes	glp1ncl1 / glp1	Proteomics	F28B4.3	-0.332603	yes
WBGene00010904	-0.446325	0.00191232	0.0139627	yes	glp1ncl1 / glp1	Proteomics	ugt-62	-0.519283	yes
WBGene00000757	-0.439217	0.00202446	0.0147462	yes	glp1ncl1 / glp1	Proteomics	col-184	-0.426885	yes
WBGene00020139	-0.348053	0.00204287	0.0148449	yes	glp1ncl1 / glp1	Proteomics	T01B11.2	-0.0476784	no
WBGene00000215	-0.483319	0.00210111	0.0152318	yes	glp1ncl1 / glp1	Proteomics	asp-2	-0.247172	no
WBGene00000160	-0.0387749	0.445769	0.643865	no	glp1ncl1 / glp1	Proteomics	apb-1	0.0150975	no
WBGene00008149	0.248713	0.00214531	0.0154787	yes	glp1ncl1 / glp1	Proteomics	pyp-1	0.549557	yes
WBGene00001501	-0.322911	0.00218212	0.0157072	yes	glp1ncl1 / glp1	Proteomics	ftn-2	-0.328355	yes
WBGene00020348	1.19065	0.0021971	0.0157777	yes	glp1ncl1 / glp1	Proteomics	mrpl-23	0.23787	no
WBGene00009531	0.266455	0.00221797	0.0158703	yes	glp1ncl1 / glp1	Proteomics	F38B2.4	-0.058028	no
WBGene00011527	0.27655	0.00222712	0.0158703	yes	glp1ncl1 / glp1	Proteomics	cchl-1	0.925212	yes
WBGene00021133	0.415119	0.00223035	0.0158703	yes	glp1ncl1 / glp1	Proteomics	tomm-22	0.45246	yes
WBGene00021920	0.336406	0.00223078	0.0158703	yes	glp1ncl1 / glp1	Proteomics	mrps-25	0.783161	yes
WBGene00009319	-0.168294	0.00230913	0.0163895	yes	glp1ncl1 / glp1	Proteomics	mccc-1	-0.180898	no
WBGene00020036	0.403179	0.00231753	0.0163929	yes	glp1ncl1 / glp1	Proteomics	R12E2.11	-0.0383015	no
WBGene00015346	0.392463	0.00232035	0.0163929	yes	glp1ncl1 / glp1	Proteomics	C02F5.3	1.01877	yes
WBGene00001209	0.182613	0.00233832	0.0164816	yes	glp1ncl1 / glp1	Proteomics	egl-45	0.599746	yes
WBGene00016415	-0.264941	0.00235077	0.0165312	yes	glp1ncl1 / glp1	Proteomics	ampd-1	-0.286929	yes
WBGene00022848	-0.193977	0.00237476	0.0166616	yes	glp1ncl1 / glp1	Proteomics	ZK1055.7	-0.114402	no
WBGene00044083	0.43712	0.00242138	0.0169496	yes	glp1ncl1 / glp1	Proteomics	exos-4.1,tin-9.2	1.17777	yes
WBGene00008377	-0.415043	0.00244372	0.0170285	yes	glp1ncl1 / glp1	Proteomics	D1054.10	-0.400553	yes
WBGene00013867	-0.488551	0.00248423	0.0172708	yes	glp1ncl1 / glp1	Proteomics	ZC373.2	-0.390513	yes
WBGene00010197	-0.352443	0.00249874	0.0173322	yes	glp1ncl1 / glp1	Proteomics	F57C2.5	-0.268136	yes
WBGene00011529	-1.06746	0.00250925	0.0173656	yes	glp1ncl1 / glp1	Proteomics	T06D8.9	-0.113074	no
WBGene00000754	-0.756043	0.00262191	0.0180723	yes	glp1ncl1 / glp1	Proteomics	col-181	-0.49588	yes
WBGene00019836	2.43183	0.00262321	0.0180723	yes	glp1ncl1 / glp1	Proteomics	R02F2.7	2.11736	yes
WBGene00022042	0.264807	0.00265502	0.0182503	yes	glp1ncl1 / glp1	Proteomics	icd-2	1.08206	yes
WBGene00008967	1.87658	0.00268108	0.018388	yes	glp1ncl1 / glp1	Proteomics	F20B10.3	1.5025	yes
WBGene00008565	-0.539407	0.00270085	0.0184821	yes	glp1ncl1 / glp1	Proteomics	acox-2	-0.374626	yes
WBGene00003148	0.250383	0.00276246	0.0188614	yes	glp1ncl1 / glp1	Proteomics	mbf-1	0.595743	yes
WBGene00008669	-0.195214	0.00279127	0.0190155	yes	glp1ncl1 / glp1	Proteomics	acs-14	-0.0484648	no
WBGene00000206	0.478683	0.00281124	0.019108	yes	glp1ncl1 / glp1	Proteomics	asb-1	0.300075	no
WBGene00007089	0.374381	0.00281736	0.019108	yes	glp1ncl1 / glp1	Proteomics	B0001.4	0.2074	no
WBGene00022765	0.839783	0.00282844	0.0191406	yes	glp1ncl1 / glp1	Proteomics	ZK546.14	2.46016	yes
WBGene00009128	0.333171	0.00286892	0.0193716	yes	glp1ncl1 / glp1	Proteomics	mrpl-54	0.718815	yes
WBGene00017541	-0.394037	0.00289141	0.0194803	yes	glp1ncl1 / glp1	Proteomics	F17E9.4	-0.325908	yes
WBGene00006572	1.36152	0.00290576	0.019523	yes	glp1ncl1 / glp1	Proteomics	tin-9.1	1.17169	yes
WBGene00007867	-1.17257	0.00291054	0.019523	yes	glp1ncl1 / glp1	Proteomics	C32H11.4	-1.49461	yes
WBGene00001333	-0.188136	0.00296674	0.0198563	yes	glp1ncl1 / glp1	Proteomics	erm-1	-0.113526	no
WBGene00000199	-0.0665781	0.469727	0.665865	no	glp1ncl1 / glp1	Proteomics	arx-1	0.0779867	no
WBGene00022515	-0.319481	0.00301172	0.0200694	yes	glp1ncl1 / glp1	Proteomics	ttr-48	-0.442209	yes
WBGene00012998	1.62898	0.00303848	0.0202036	yes	glp1ncl1 / glp1	Proteomics	Y48C3A.20	1.76205	yes
WBGene00019361	0.190337	0.00312599	0.0207403	yes	glp1ncl1 / glp1	Proteomics	K03E5.2	0.120512	no
WBGene00000677	-0.391643	0.00323225	0.0213988	yes	glp1ncl1 / glp1	Proteomics	col-103	-0.485537	yes
WBGene00011743	0.259948	0.00329691	0.0217796	yes	glp1ncl1 / glp1	Proteomics	T13F2.2	0.787009	yes
WBGene00019326	-0.37373	0.00336275	0.0221356	yes	glp1ncl1 / glp1	Proteomics	K02F3.2	-0.32447	yes
WBGene00002249	-0.238834	0.0033653	0.0221356	yes	glp1ncl1 / glp1	Proteomics	lap-1	-0.178373	no
WBGene00021097	0.186753	0.00340905	0.0223353	yes	glp1ncl1 / glp1	Proteomics	cdc-37	0.126995	no
WBGene00002265	-0.206373	0.0034103	0.0223353	yes	glp1ncl1 / glp1	Proteomics	lec-2	-0.24098	no
WBGene00015814	-0.341322	0.00342334	0.0223712	yes	glp1ncl1 / glp1	Proteomics	C16A3.10	-0.412311	yes
WBGene00006863	0.28778	0.00343045	0.0223712	yes	glp1ncl1 / glp1	Proteomics	gyg-1	0.0716832	no
WBGene00012274	-0.267997	0.0034423	0.0224006	yes	glp1ncl1 / glp1	Proteomics	W05B5.1	-0.438795	no
WBGene00016957	-0.235134	0.00355305	0.0230721	yes	glp1ncl1 / glp1	Proteomics	atic-1	-0.269686	yes
WBGene00002250	-0.179727	0.00356577	0.0231056	yes	glp1ncl1 / glp1	Proteomics	lap-2	-0.0335944	no
WBGene00011273	-0.306104	0.00361991	0.0234067	yes	glp1ncl1 / glp1	Proteomics	R53.4	-0.0803066	no
WBGene00000200	-0.0732212	0.322124	0.529414	no	glp1ncl1 / glp1	Proteomics	arx-2	0.0528569	no
WBGene00000780	0.241307	0.0036511	0.0235088	yes	glp1ncl1 / glp1	Proteomics	cpn-4	0.119583	no
WBGene00001692	-0.52924	0.00368357	0.0236679	yes	glp1ncl1 / glp1	Proteomics	grd-3	-0.734199	yes
WBGene00008344	1.14065	0.00369512	0.0236922	yes	glp1ncl1 / glp1	Proteomics	C56A3.5	1.97572	yes
WBGene00000786	-0.508957	0.00371699	0.0237825	yes	glp1ncl1 / glp1	Proteomics	cpr-6	-0.464085	yes
WBGene00000781	1.54715	0.00378304	0.0241545	yes	glp1ncl1 / glp1	Proteomics	cpr-1	1.97395	yes
WBGene00001629	-0.346659	0.00383444	0.0244316	yes	glp1ncl1 / glp1	Proteomics	gly-4	-0.300584	yes
WBGene00014054	-0.189548	0.00384679	0.0244591	yes	glp1ncl1 / glp1	Proteomics	ZK669.4	-0.192299	no
WBGene00007000	0.14481	0.0038572	0.0244744	yes	glp1ncl1 / glp1	Proteomics	tufm-1	0.722203	yes
WBGene00019900	-0.142777	0.00387938	0.024564	yes	glp1ncl1 / glp1	Proteomics	vdac-1	-0.132385	no
WBGene00019001	-0.20553	0.00392638	0.0248102	yes	glp1ncl1 / glp1	Proteomics	ipgm-1	-0.180909	no
WBGene00001784	-0.373474	0.00396548	0.0250055	yes	glp1ncl1 / glp1	Proteomics	gst-36	-0.285355	yes
WBGene00021061	0.891446	0.00399798	0.025137	yes	glp1ncl1 / glp1	Proteomics	W06E11.1	1.27602	yes
WBGene00019673	-0.198073	0.00400282	0.025137	yes	glp1ncl1 / glp1	Proteomics	K12C11.1	-0.221845	no
WBGene00017864	0.17375	0.00409174	0.0255935	yes	glp1ncl1 / glp1	Proteomics	pcca-1	0.281019	yes
WBGene00004411	1.5532	0.00409227	0.0255935	yes	glp1ncl1 / glp1	Proteomics	rpc-1	1.59264	yes
WBGene00001056	-0.274248	0.00412869	0.0257685	yes	glp1ncl1 / glp1	Proteomics	dpf-3	-0.163037	no
WBGene00008378	-0.62705	0.0041544	0.0258759	yes	glp1ncl1 / glp1	Proteomics	D1054.11	-0.406808	yes
WBGene00007223	0.979741	0.00416962	0.0259179	yes	glp1ncl1 / glp1	Proteomics	C01F6.9	0.352777	yes
WBGene00000703	-1.72506	0.00418612	0.0259675	yes	glp1ncl1 / glp1	Proteomics	col-129	-0.489177	yes
WBGene00000698	-0.77138	0.00420742	0.0260468	yes	glp1ncl1 / glp1	Proteomics	col-124	-0.50764	yes
WBGene00013677	0.270666	0.00422007	0.0260722	yes	glp1ncl1 / glp1	Proteomics	yars-1	0.767058	yes
WBGene00010942	-0.241373	0.00422905	0.0260749	yes	glp1ncl1 / glp1	Proteomics	chch-3	-0.235938	no
WBGene00000203	-0.401921	0.348683	0.555127	no	glp1ncl1 / glp1	Proteomics	arx-5	0.163617	no
WBGene00013766	0.345477	0.00426293	0.026178	yes	glp1ncl1 / glp1	Proteomics	prmt-1	1.27101	yes
WBGene00003826	-0.347353	0.00428018	0.0262249	yes	glp1ncl1 / glp1	Proteomics	ntl-3	-0.0909304	no
WBGene00000833	0.164658	0.00428775	0.0262249	yes	glp1ncl1 / glp1	Proteomics	cts-1	0.324644	yes
WBGene00012375	-0.204636	0.00439261	0.0268125	yes	glp1ncl1 / glp1	Proteomics	mecr-1	-0.123588	no
WBGene00013647	0.447615	0.00445219	0.027071	yes	glp1ncl1 / glp1	Proteomics	Y105C5B.5	0.479054	yes
WBGene00021852	-0.239412	0.0044527	0.027071	yes	glp1ncl1 / glp1	Proteomics	Y54F10AM.8	-0.300895	yes
WBGene00011571	-0.562263	0.00448209	0.0271489	yes	glp1ncl1 / glp1	Proteomics	ttr-46	-0.39091	yes
WBGene00012830	0.254725	0.00449178	0.0271489	yes	glp1ncl1 / glp1	Proteomics	mrps-28	1.49221	yes
WBGene00003553	0.282527	0.0044922	0.0271489	yes	glp1ncl1 / glp1	Proteomics	nas-37	0.211338	no
WBGene00006819	-0.155468	0.0046059	0.027781	yes	glp1ncl1 / glp1	Proteomics	unc-87	-0.265612	yes
WBGene00000067	-0.303074	0.00470871	0.0283451	yes	glp1ncl1 / glp1	Proteomics	act-5	#N/A	#N/A
WBGene00003369	1.9562	0.00476122	0.0286048	yes	glp1ncl1 / glp1	Proteomics	mlc-1	-0.0809188	no
WBGene00001758	-0.382377	0.00478579	0.0286959	yes	glp1ncl1 / glp1	Proteomics	gst-10	-0.479756	yes
WBGene00010015	0.217964	0.00483769	0.0289502	yes	glp1ncl1 / glp1	Proteomics	atad-3	1.00152	yes
WBGene00018925	-0.30071	0.0048492	0.0289624	yes	glp1ncl1 / glp1	Proteomics	F56A11.5	-0.154707	no
WBGene00000381	0.218715	0.00488917	0.029144	yes	glp1ncl1 / glp1	Proteomics	cct-6	0.545334	yes
WBGene00015671	1.33395	0.00490354	0.0291727	yes	glp1ncl1 / glp1	Proteomics	C10B5.3	-0.211094	no
WBGene00002001	0.2422	0.00494164	0.0293422	yes	glp1ncl1 / glp1	Proteomics	hars-1	1.033	yes
WBGene00012713	-0.172228	0.00497339	0.029465	yes	glp1ncl1 / glp1	Proteomics	Y39E4A.3	-0.297952	yes
WBGene00020275	-0.230916	0.00498163	0.029465	yes	glp1ncl1 / glp1	Proteomics	alh-4,atp-4	-0.0136791	no
WBGene00017775	-0.387891	0.00500352	0.0295372	yes	glp1ncl1 / glp1	Proteomics	F25B5.3	-0.444952	yes
WBGene00044081	-0.428741	0.00509288	0.0299739	yes	glp1ncl1 / glp1	Proteomics	D1086.11	-0.282786	yes
WBGene00000933	0.459378	0.00509972	0.0299739	yes	glp1ncl1 / glp1	Proteomics	dap-3	1.08444	yes
WBGene00017272	-0.166417	0.00510696	0.0299739	yes	glp1ncl1 / glp1	Proteomics	F08F8.7	-0.152501	no
WBGene00018604	-0.202133	0.00514656	0.0301106	yes	glp1ncl1 / glp1	Proteomics	uggt-1	-0.042736	no
WBGene00006914	-0.327269	0.00514997	0.0301106	yes	glp1ncl1 / glp1	Proteomics	vha-5	-0.374887	yes
WBGene00006927	-0.613515	0.00525582	0.0306707	yes	glp1ncl1 / glp1	Proteomics	vit-3	-0.595649	yes
WBGene00001231	0.200215	0.00529382	0.0308335	yes	glp1ncl1 / glp1	Proteomics	eif-3.H	0.752947	yes
WBGene00018793	0.325526	0.00543301	0.0315602	yes	glp1ncl1 / glp1	Proteomics	mrpl-40	0.394814	yes
WBGene00000217	-0.315175	0.00543927	0.0315602	yes	glp1ncl1 / glp1	Proteomics	asp-4	-0.348927	yes
WBGene00000205	-0.0166701	0.887629	0.932715	no	glp1ncl1 / glp1	Proteomics	arx-7	0.0818113	no
WBGene00009259	-0.23621	0.00553523	0.0319559	yes	glp1ncl1 / glp1	Proteomics	hpo-34	-0.357596	yes
WBGene00019882	-0.227142	0.00553888	0.0319559	yes	glp1ncl1 / glp1	Proteomics	R05D3.9	-0.134063	no
WBGene00015075	0.872929	0.00559161	0.0321992	yes	glp1ncl1 / glp1	Proteomics	B0238.11	0.747059	yes
WBGene00006787	-0.171023	0.00564529	0.0324471	yes	glp1ncl1 / glp1	Proteomics	unc-52	-0.388079	yes
WBGene00022645	-0.26427	0.00565681	0.0324522	yes	glp1ncl1 / glp1	Proteomics	ZK6.11	-0.130569	no
WBGene00004955	1.39432	0.00569652	0.0325275	yes	glp1ncl1 / glp1	Proteomics	spd-5	0.310593	yes
WBGene00008444	-0.260865	0.00570112	0.0325275	yes	glp1ncl1 / glp1	Proteomics	tbc-14	-0.235891	no
WBGene00014095	-0.191511	0.00571181	0.0325275	yes	glp1ncl1 / glp1	Proteomics	gdh-1	-0.472213	yes
WBGene00013575	-0.234711	0.00571255	0.0325275	yes	glp1ncl1 / glp1	Proteomics	acs-5	-0.288881	yes
WBGene00001262	-0.293264	0.00577378	0.0328149	yes	glp1ncl1 / glp1	Proteomics	emb-8	-0.173895	no
WBGene00015803	-0.346421	0.00583144	0.033081	yes	glp1ncl1 / glp1	Proteomics	C15H9.9	-0.259224	no
WBGene00000693	-0.343566	0.00586281	0.0331972	yes	glp1ncl1 / glp1	Proteomics	col-119	-0.318583	no
WBGene00015141	-0.575514	0.00592928	0.0335114	yes	glp1ncl1 / glp1	Proteomics	ugt-46	-0.729721	yes
WBGene00022365	1.1821	0.00595552	0.0335975	yes	glp1ncl1 / glp1	Proteomics	Y92H12BL.4	0.435879	no
WBGene00003903	-0.158328	0.00602387	0.0339204	yes	glp1ncl1 / glp1	Proteomics	pab-2	-0.180599	no
WBGene00019656	-0.278862	0.00607954	0.0341708	yes	glp1ncl1 / glp1	Proteomics	K11G12.5	-0.468467	yes
WBGene00020499	0.337803	0.00615425	0.034459	yes	glp1ncl1 / glp1	Proteomics	T14B4.2	0.40988	no
WBGene00015092	0.327428	0.00616865	0.034459	yes	glp1ncl1 / glp1	Proteomics	mrpl-47	0.23608	no
WBGene00003372	-0.241382	0.00617462	0.034459	yes	glp1ncl1 / glp1	Proteomics	mlc-4	-0.184454	no
WBGene00000229	-0.069049	0.144798	0.324943	no	glp1ncl1 / glp1	Proteomics	atp-2	0.0740524	no
WBGene00006889	0.650717	0.0062518	0.0348184	yes	glp1ncl1 / glp1	Proteomics	pfd-3	0.248017	no
WBGene00000230	-0.0954268	0.0734975	0.208277	no	glp1ncl1 / glp1	Proteomics	atp-3	0.0189528	no
WBGene00002247	0.182094	0.00637205	0.0353591	yes	glp1ncl1 / glp1	Proteomics	lam-1	0.304413	no
WBGene00001898	-0.471755	0.00643427	0.0356395	yes	glp1ncl1 / glp1	Proteomics	his-24	-0.0453737	no
WBGene00001025	-0.302372	0.0065178	0.0360368	yes	glp1ncl1 / glp1	Proteomics	dnj-7	-0.26738	yes
WBGene00014213	-0.169989	0.00656881	0.0362108	yes	glp1ncl1 / glp1	Proteomics	ZK1073.1	-0.12603	no
WBGene00000789	-0.368018	0.00659718	0.0362108	yes	glp1ncl1 / glp1	Proteomics	cpz-2	-0.144555	no
WBGene00000235	-0.0680881	0.568089	0.736537	no	glp1ncl1 / glp1	Proteomics	baf-1	0.188058	no
WBGene00000266	-0.135592	0.315175	0.523633	no	glp1ncl1 / glp1	Proteomics	bre-1	0.0189937	no
WBGene00002060	0.188545	0.00660859	0.0362108	yes	glp1ncl1 / glp1	Proteomics	ife-2	0.511567	yes
WBGene00008572	0.394704	0.0066591	0.0363691	yes	glp1ncl1 / glp1	Proteomics	F08B12.4	0.418059	yes
WBGene00022201	-0.18982	0.00666131	0.0363691	yes	glp1ncl1 / glp1	Proteomics	Y71H10B.1	-0.264028	yes
WBGene00002891	-0.287618	0.00670423	0.036538	yes	glp1ncl1 / glp1	Proteomics	C56G2.7,let-767	-0.250218	yes
WBGene00000301	-0.392949	0.496058	0.686919	no	glp1ncl1 / glp1	Proteomics	cav-1	5.6921	no
WBGene00002008	-0.313136	0.00674726	0.0366417	yes	glp1ncl1 / glp1	Proteomics	hsp-4	-0.324976	yes
WBGene00014207	-0.196292	0.00677244	0.0366923	yes	glp1ncl1 / glp1	Proteomics	ZK1058.9	-0.253761	yes
WBGene00018341	0.192895	0.00679858	0.0366923	yes	glp1ncl1 / glp1	Proteomics	F42A10.5	0.520631	yes
WBGene00001328	0.142647	0.00680756	0.0366923	yes	glp1ncl1 / glp1	Proteomics	epi-1	0.34786	yes
WBGene00020601	0.694673	0.00683178	0.0366923	yes	glp1ncl1 / glp1	Proteomics	T20B12.3	2.48464	yes
WBGene00006518	-0.228247	0.00684101	0.0366923	yes	glp1ncl1 / glp1	Proteomics	tag-173	-0.193679	no
WBGene00017691	-0.477752	0.00684885	0.0366923	yes	glp1ncl1 / glp1	Proteomics	ilys-5	-0.21394	no
WBGene00020383	0.193965	0.0068518	0.0366923	yes	glp1ncl1 / glp1	Proteomics	tin-44	0.373358	yes
WBGene00021715	1.56522	0.00685275	0.0366923	yes	glp1ncl1 / glp1	Proteomics	Y49F6B.2	2.04289	yes
WBGene00004189	0.157021	0.00692257	0.0370012	yes	glp1ncl1 / glp1	Proteomics	pars-1	0.873933	yes
WBGene00016392	0.269611	0.00704828	0.0376073	yes	glp1ncl1 / glp1	Proteomics	sdha-2	0.495505	yes
WBGene00000550	0.201086	0.00720985	0.0384022	yes	glp1ncl1 / glp1	Proteomics	clu-1	0.638997	yes
WBGene00021854	-0.193512	0.00745135	0.0396194	yes	glp1ncl1 / glp1	Proteomics	Y54F10AR.1	-0.0607312	no
WBGene00020107	-0.255788	0.00768739	0.0408033	yes	glp1ncl1 / glp1	Proteomics	R151.2	-0.15203	no
WBGene00021817	1.38297	0.00773709	0.0409343	yes	glp1ncl1 / glp1	Proteomics	Y53G8B.1	-0.184075	no
WBGene00018467	-0.63752	0.00773889	0.0409343	yes	glp1ncl1 / glp1	Proteomics	sdpn-1	-0.351279	no
WBGene00001581	-0.434525	0.00788737	0.0416241	yes	glp1ncl1 / glp1	Proteomics	gfi-1	-0.380689	yes
WBGene00013210	0.338656	0.00791592	0.0416241	yes	glp1ncl1 / glp1	Proteomics	Y54G9A.7	1.08502	yes
WBGene00021548	-0.432852	0.00791623	0.0416241	yes	glp1ncl1 / glp1	Proteomics	trx-4	-0.126781	no
WBGene00004807	0.511078	0.00792386	0.0416241	yes	glp1ncl1 / glp1	Proteomics	skr-1	-0.0962324	no
WBGene00008548	-0.250864	0.00801124	0.041997	yes	glp1ncl1 / glp1	Proteomics	F07A11.5	-0.591693	yes
WBGene00011119	-0.350327	0.00802235	0.041997	yes	glp1ncl1 / glp1	Proteomics	R07E5.13	-0.493233	yes
WBGene00016848	-0.344032	0.00813326	0.0425046	yes	glp1ncl1 / glp1	Proteomics	C46A5.4,klo-1	-0.457267	no
WBGene00015809	1.47589	0.00816379	0.0425429	yes	glp1ncl1 / glp1	Proteomics	C16A3.4,C16A3.5	0.0431509	no
WBGene00019332	-0.232884	0.00816846	0.0425429	yes	glp1ncl1 / glp1	Proteomics	K02F3.9	-0.243341	no
WBGene00000113	-0.220729	0.00826074	0.0428884	yes	glp1ncl1 / glp1	Proteomics	alh-7	-0.0526994	no
WBGene00022002	0.587336	0.00827654	0.0428884	yes	glp1ncl1 / glp1	Proteomics	Y59E9AR.7	#N/A	#N/A
WBGene00015313	1.07797	0.00828304	0.0428884	yes	glp1ncl1 / glp1	Proteomics	hpo-32	1.9668	yes
WBGene00019220	0.155469	0.00829101	0.0428884	yes	glp1ncl1 / glp1	Proteomics	pfd-2	0.180414	no
WBGene00021466	0.184565	0.00834823	0.0430834	yes	glp1ncl1 / glp1	Proteomics	Y39G10AR.8	0.669296	yes
WBGene00138717	0.740076	0.00835694	0.0430834	yes	glp1ncl1 / glp1	Proteomics	F52C12.6	0.75897	yes
WBGene00002066	0.206698	0.00846148	0.0434248	yes	glp1ncl1 / glp1	Proteomics	ifg-1	0.154604	no
WBGene00019572	-0.197429	0.00846456	0.0434248	yes	glp1ncl1 / glp1	Proteomics	K09E2.3	-0.0255821	no
WBGene00000673	-0.579112	0.00846584	0.0434248	yes	glp1ncl1 / glp1	Proteomics	col-98	-0.516935	yes
WBGene00012984	0.942977	0.00849898	0.0435216	yes	glp1ncl1 / glp1	Proteomics	Y48B6A.13	1.56143	yes
WBGene00007646	-0.330971	0.00856316	0.0437768	yes	glp1ncl1 / glp1	Proteomics	nkb-1	-0.233066	no
WBGene00022742	1.1873	0.00857849	0.0437819	yes	glp1ncl1 / glp1	Proteomics	ZK430.7	2.134	yes
WBGene00008506	-0.170259	0.00865479	0.0440277	yes	glp1ncl1 / glp1	Proteomics	tkt-1	-0.177279	no
WBGene00010793	-0.511613	0.00866588	0.0440277	yes	glp1ncl1 / glp1	Proteomics	LLC1.2	-0.401719	yes
WBGene00007458	-0.407486	0.00866993	0.0440277	yes	glp1ncl1 / glp1	Proteomics	C08F11.11	-0.310781	yes
WBGene00019624	-0.169404	0.00877226	0.0444733	yes	glp1ncl1 / glp1	Proteomics	K10C9.3	-0.0640441	no
WBGene00022420	0.930813	0.00885783	0.0447878	yes	glp1ncl1 / glp1	Proteomics	Y102E9.2	0.688467	yes
WBGene00020765	-0.274977	0.00886365	0.0447878	yes	glp1ncl1 / glp1	Proteomics	T24C12.3	-0.114632	no
WBGene00010721	1.53684	0.00892685	0.0450326	yes	glp1ncl1 / glp1	Proteomics	K09E4.3	0.673628	yes
WBGene00020674	-0.887238	0.0090036	0.0453449	yes	glp1ncl1 / glp1	Proteomics	T22B7.7	-0.777324	yes
WBGene00011440	-0.278397	0.00906669	0.0455782	yes	glp1ncl1 / glp1	Proteomics	sfxn-1.5	-0.134258	no
WBGene00020869	0.289793	0.00908429	0.0455782	yes	glp1ncl1 / glp1	Proteomics	T28A11.2	0.63947	yes
WBGene00017300	0.715593	0.00909474	0.0455782	yes	glp1ncl1 / glp1	Proteomics	rpc-2	1.59996	yes
WBGene00000391	-0.249642	0.136821	0.311857	no	glp1ncl1 / glp1	Proteomics	cdd-1	0.0770961	no
WBGene00016020	-0.236849	0.00927453	0.0463271	yes	glp1ncl1 / glp1	Proteomics	sptl-1	-0.200336	no
WBGene00009712	0.238394	0.0093418	0.0465869	yes	glp1ncl1 / glp1	Proteomics	F44G4.2	-0.0531182	no
WBGene00011393	0.252323	0.00936691	0.0466359	yes	glp1ncl1 / glp1	Proteomics	T03D8.6	0.694294	yes
WBGene00012015	-0.212852	0.00946685	0.0470132	yes	glp1ncl1 / glp1	Proteomics	T25B9.9	-0.29134	yes
WBGene00002999	-0.895045	0.0094735	0.0470132	yes	glp1ncl1 / glp1	Proteomics	lin-10	-0.245739	no
WBGene00000528	-0.986523	0.00952008	0.0471055	yes	glp1ncl1 / glp1	Proteomics	clh-1	-0.11487	no
WBGene00045038	-0.643196	0.00952297	0.0471055	yes	glp1ncl1 / glp1	Proteomics	F13G11.3	-0.403609	yes
WBGene00016989	0.285011	0.0095641	0.0472324	yes	glp1ncl1 / glp1	Proteomics	CD4.3	0.495835	yes
WBGene00000473	-0.489356	0.256229	0.465761	no	glp1ncl1 / glp1	Proteomics	cey-2	3.9807	yes
WBGene00012258	-0.293504	0.00973424	0.0479176	yes	glp1ncl1 / glp1	Proteomics	W04G3.5	-0.263297	yes
WBGene00017971	-0.283621	0.00975961	0.0479651	yes	glp1ncl1 / glp1	Proteomics	F32A5.8	-0.296146	yes
WBGene00001429	0.372669	0.00984653	0.0483145	yes	glp1ncl1 / glp1	Proteomics	fkb-4	1.79776	yes
WBGene00003828	-0.30882	0.00994813	0.0487346	yes	glp1ncl1 / glp1	Proteomics	nuc-1	-0.30207	yes
WBGene00007628	0.980021	0.010008	0.0489496	yes	glp1ncl1 / glp1	Proteomics	C16C10.8	2.33342	yes
WBGene00001228	0.202023	0.0100361	0.0489547	yes	glp1ncl1 / glp1	Proteomics	eif-3.E	0.778728	yes
WBGene00007934	-0.274714	0.0100568	0.0489547	yes	glp1ncl1 / glp1	Proteomics	C34E7.4	-0.275978	no
WBGene00012342	1.17263	0.0100572	0.0489547	yes	glp1ncl1 / glp1	Proteomics	mtr-4	0.901836	yes
WBGene00014202	0.176868	0.0101021	0.0490947	yes	glp1ncl1 / glp1	Proteomics	mmcm-1	0.0411957	no
WBGene00000512	-0.0624517	0.505938	0.695865	no	glp1ncl1 / glp1	Proteomics	ckb-2	0.0929569	no
WBGene00000751	-0.95866	0.0102073	0.0494489	yes	glp1ncl1 / glp1	Proteomics	col-178	-0.333043	yes
WBGene00009575	0.268591	0.0103038	0.0498371	yes	glp1ncl1 / glp1	Proteomics	F40F8.1	0.338865	yes
WBGene00016084	-0.43047	0.0105292	0.0508469	no	glp1ncl1 / glp1	Proteomics	cht-3	-0.373468	yes
WBGene00009595	-0.28383	0.0105519	0.0508756	no	glp1ncl1 / glp1	Proteomics	F40F12.7	-0.273144	no
WBGene00012126	0.21195	0.0105952	0.0510041	no	glp1ncl1 / glp1	Proteomics	T28D6.6	0.615313	yes
WBGene00008607	-0.236046	0.0106172	0.0510297	no	glp1ncl1 / glp1	Proteomics	F09B12.3	-0.197899	no
WBGene00000542	-0.108468	0.0867441	0.231602	no	glp1ncl1 / glp1	Proteomics	clp-1	0.00528848	no
WBGene00015794	-0.258222	0.0107495	0.051503	no	glp1ncl1 / glp1	Proteomics	C15F1.1	-0.0623857	no
WBGene00001814	-0.370459	0.0108507	0.0519054	no	glp1ncl1 / glp1	Proteomics	haf-4	-0.116386	no
WBGene00000639	-0.18882	0.208989	0.410711	no	glp1ncl1 / glp1	Proteomics	col-63	0.763772	yes
WBGene00019305	-0.182768	0.0111158	0.0530082	no	glp1ncl1 / glp1	Proteomics	snap-29	-0.315386	yes
WBGene00010776	1.65385	0.0111404	0.053043	no	glp1ncl1 / glp1	Proteomics	pix-1	-0.0384337	no
WBGene00000984	-0.253482	0.0113562	0.0539862	no	glp1ncl1 / glp1	Proteomics	dhs-21	-0.00648116	no
WBGene00011883	0.288163	0.0114245	0.0542264	no	glp1ncl1 / glp1	Proteomics	mrpl-50	0.367878	yes
WBGene00007455	-0.455454	0.0115158	0.0545747	no	glp1ncl1 / glp1	Proteomics	ugt-22	-0.476095	yes
WBGene00018602	-1.00755	0.0115856	0.0548206	no	glp1ncl1 / glp1	Proteomics	F48D6.4	-0.870213	yes
WBGene00010416	-0.17856	0.0116554	0.054908	no	glp1ncl1 / glp1	Proteomics	hxk-2	-0.0404203	no
WBGene00021857	0.201591	0.011658	0.054908	no	glp1ncl1 / glp1	Proteomics	iffb-1	0.416102	yes
WBGene00001132	0.142239	0.0116659	0.054908	no	glp1ncl1 / glp1	Proteomics	alp-1	0.168351	no
WBGene00001823	2.12045	0.011676	0.054908	no	glp1ncl1 / glp1	Proteomics	gop-3,hap-1	0.464345	yes
WBGene00017641	-0.795483	0.0118021	0.0553706	no	glp1ncl1 / glp1	Proteomics	csr-1	-0.149951	no
WBGene00011938	-0.229448	0.011853	0.0553706	no	glp1ncl1 / glp1	Proteomics	alh-13	-0.574234	yes
WBGene00003786	-0.203278	0.0118904	0.0553706	no	glp1ncl1 / glp1	Proteomics	npa-1	-0.280736	yes
WBGene00001572	-0.201528	0.0118921	0.0553706	no	glp1ncl1 / glp1	Proteomics	gei-15	-0.283314	no
WBGene00018932	0.205674	0.0119077	0.0553706	no	glp1ncl1 / glp1	Proteomics	mrpl-2	0.587095	yes
WBGene00016194	0.128745	0.0119262	0.0553706	no	glp1ncl1 / glp1	Proteomics	C28H8.3	0.795157	yes
WBGene00000941	0.182673	0.0119263	0.0553706	no	glp1ncl1 / glp1	Proteomics	ddp-1	0.422447	yes
WBGene00006791	0.310425	0.0119278	0.0553706	no	glp1ncl1 / glp1	Proteomics	unc-57	-0.117723	no
WBGene00023485	-0.705183	0.0119505	0.0553706	no	glp1ncl1 / glp1	Proteomics	ttr-49	-0.415518	yes
WBGene00004208	0.98427	0.0119558	0.0553706	no	glp1ncl1 / glp1	Proteomics	ptc-1	-0.0314277	no
WBGene00010785	1.09621	0.0120532	0.0557367	no	glp1ncl1 / glp1	Proteomics	top-2	0.593484	yes
WBGene00019005	1.51349	0.0120714	0.0557367	no	glp1ncl1 / glp1	Proteomics	F57B10.8,acdh-4	1.68276	yes
WBGene00019838	0.323064	0.0121045	0.0558049	no	glp1ncl1 / glp1	Proteomics	R02F2.9	1.17806	yes
WBGene00001830	0.693681	0.0122032	0.056175	no	glp1ncl1 / glp1	Proteomics	hcp-2	0.590461	no
WBGene00001974	0.911191	0.0122785	0.0564366	no	glp1ncl1 / glp1	Proteomics	hmg-4	0.435665	yes
WBGene00013435	0.212656	0.0123901	0.0568641	no	glp1ncl1 / glp1	Proteomics	Y66D12A.9	1.0948	yes
WBGene00001790	-0.371214	0.0124184	0.0569085	no	glp1ncl1 / glp1	Proteomics	gst-42	-0.544091	yes
WBGene00018701	0.188972	0.0125118	0.0572154	no	glp1ncl1 / glp1	Proteomics	pccb-1	0.0868484	no
WBGene00010286	-0.247813	0.0125229	0.0572154	no	glp1ncl1 / glp1	Proteomics	F58H1.3	-0.362308	yes
WBGene00000110	-0.195941	0.0126068	0.0574735	no	glp1ncl1 / glp1	Proteomics	alh-4,atp-4	-0.0136791	no
WBGene00020847	-0.316349	0.012617	0.0574735	no	glp1ncl1 / glp1	Proteomics	cgr-1	-0.430443	yes
WBGene00019620	-0.201387	0.0127094	0.0578079	no	glp1ncl1 / glp1	Proteomics	asp-14,fah-1	-0.430552	yes
WBGene00000245	-0.167451	0.0127359	0.0578421	no	glp1ncl1 / glp1	Proteomics	bca-1	-0.287542	no
WBGene00022037	-0.278348	0.0127781	0.0579475	no	glp1ncl1 / glp1	Proteomics	acs-13	-0.116951	no
WBGene00006925	-0.470345	0.0128165	0.0580355	no	glp1ncl1 / glp1	Proteomics	vit-1	-0.55597	yes
WBGene00303026	0.398849	0.0128399	0.0580552	no	glp1ncl1 / glp1	Proteomics		#N/A	#N/A
WBGene00000534	-0.278006	0.0128876	0.0581847	no	glp1ncl1 / glp1	Proteomics	cpi-2	-0.364776	yes
WBGene00013269	0.406435	0.0129213	0.0582509	no	glp1ncl1 / glp1	Proteomics	Y57A10A.29	0.0756907	no
WBGene00000649	-0.605825	0.11437	0.278132	no	glp1ncl1 / glp1	Proteomics	col-73	0.391426	yes
WBGene00015920	0.204207	0.0129719	0.0583065	no	glp1ncl1 / glp1	Proteomics	C17G10.9	0.896124	yes
WBGene00044080	-0.286588	0.0132772	0.059591	no	glp1ncl1 / glp1	Proteomics	D1086.10	-0.406268	yes
WBGene00008979	-0.182476	0.0133327	0.0597524	no	glp1ncl1 / glp1	Proteomics	F20D1.9	-0.399728	yes
WBGene00000105	-0.218774	0.0133613	0.0597928	no	glp1ncl1 / glp1	Proteomics	alg-1	-0.354158	no
WBGene00003996	-0.394436	0.0136015	0.0607784	no	glp1ncl1 / glp1	Proteomics	pgp-2	-0.354821	yes
WBGene00020142	-0.173887	0.0136598	0.0609083	no	glp1ncl1 / glp1	Proteomics	aak-2	-0.189558	no
WBGene00006928	-0.523149	0.0136704	0.0609083	no	glp1ncl1 / glp1	Proteomics	vit-4	-0.646833	yes
WBGene00010593	0.237438	0.0137545	0.0611265	no	glp1ncl1 / glp1	Proteomics	gsnl-1	0.222421	no
WBGene00019730	-0.595028	0.0137595	0.0611265	no	glp1ncl1 / glp1	Proteomics	asns-2	-0.696498	yes
WBGene00001173	-0.166868	0.0139058	0.0616234	no	glp1ncl1 / glp1	Proteomics	egl-4	-0.204366	no
WBGene00001167	0.185712	0.0139117	0.0616234	no	glp1ncl1 / glp1	Proteomics	eef-2	1.03223	yes
WBGene00000667	-0.640194	1.95061e-05	0.000399547	yes	glp1ncl1 / glp1	Proteomics	col-92	0.103405	no
WBGene00017201	-0.44248	0.0143056	0.0631849	no	glp1ncl1 / glp1	Proteomics	grsp-4	-0.100756	no
WBGene00007587	0.142595	0.0143357	0.0632262	no	glp1ncl1 / glp1	Proteomics	mma-1	0.588359	yes
WBGene00001029	0.258174	0.0143916	0.0633812	no	glp1ncl1 / glp1	Proteomics	dnj-11	0.791908	yes
WBGene00000066	-0.178739	0.0144334	0.0634738	no	glp1ncl1 / glp1	Proteomics	act-4	-0.205092	no
WBGene00000748	-0.74896	0.163696	0.351599	no	glp1ncl1 / glp1	Proteomics	col-175	0.34207	yes
WBGene00006059	-0.360378	0.0145706	0.0638931	no	glp1ncl1 / glp1	Proteomics	stc-1	-0.117736	no
WBGene00000712	-1.86086	0.0146412	0.0641102	no	glp1ncl1 / glp1	Proteomics	col-139	-0.489014	yes
WBGene00001137	-0.245695	0.0147972	0.0646803	no	glp1ncl1 / glp1	Proteomics	eat-6	-0.263371	yes
WBGene00007350	-0.120651	0.0148137	0.0646803	no	glp1ncl1 / glp1	Proteomics	sucl-1	-0.299332	yes
WBGene00019162	0.194177	0.0149284	0.0650876	no	glp1ncl1 / glp1	Proteomics	eif-1.A	0.369662	yes
WBGene00020215	-0.456523	0.015029	0.065433	no	glp1ncl1 / glp1	Proteomics	T04G9.4	-0.336623	yes
WBGene00000115	-0.199563	0.0150617	0.0654819	no	glp1ncl1 / glp1	Proteomics	alh-9	-0.255507	yes
WBGene00017777	1.10716	0.0150923	0.0655036	no	glp1ncl1 / glp1	Proteomics	F25B5.6	0.424179	yes
WBGene00021305	-0.286332	0.0151096	0.0655036	no	glp1ncl1 / glp1	Proteomics	oig-6	-0.320456	no
WBGene00006915	-0.454169	0.0151452	0.0655648	no	glp1ncl1 / glp1	Proteomics	vha-6	-0.406168	yes
WBGene00000784	1.05947	0.0152192	0.065792	no	glp1ncl1 / glp1	Proteomics	cpr-4	1.05207	yes
WBGene00012326	-0.191061	0.015376	0.0662936	no	glp1ncl1 / glp1	Proteomics	W07E11.1	-0.356366	yes
WBGene00000764	-0.361079	0.113396	0.276647	no	glp1ncl1 / glp1	Proteomics	coq-4	0.15956	no
WBGene00022159	0.263053	0.0156913	0.0675455	no	glp1ncl1 / glp1	Proteomics	mppa-1	1.54516	yes
WBGene00002056	-0.222896	0.0157498	0.0676188	no	glp1ncl1 / glp1	Proteomics	ifc-2	-0.0549732	no
WBGene00018778	0.877348	0.0157526	0.0676188	no	glp1ncl1 / glp1	Proteomics	F53H1.4	0.165485	no
WBGene00016002	0.161693	0.0158469	0.0679281	no	glp1ncl1 / glp1	Proteomics	C18H9.3	0.209874	no
WBGene00019097	-0.148237	0.0159182	0.0681379	no	glp1ncl1 / glp1	Proteomics	F59B1.2	-0.298378	yes
WBGene00003123	0.214951	0.0160926	0.0687878	no	glp1ncl1 / glp1	Proteomics	mag-1	0.254023	no
WBGene00007784	0.213005	0.0162932	0.0695479	no	glp1ncl1 / glp1	Proteomics	ruvb-1	1.03414	yes
WBGene00020705	0.761568	0.016416	0.0699742	no	glp1ncl1 / glp1	Proteomics	T22H9.1	2.34472	yes
WBGene00007686	0.176021	0.0165344	0.0703806	no	glp1ncl1 / glp1	Proteomics	tomm-40	0.473632	yes
WBGene00015160	1.05147	0.016589	0.0705114	no	glp1ncl1 / glp1	Proteomics	B0361.6	2.38715	yes
WBGene00000696	-0.422826	0.0166335	0.0705114	no	glp1ncl1 / glp1	Proteomics	col-122	-0.493381	yes
WBGene00015540	0.231711	0.0166344	0.0705114	no	glp1ncl1 / glp1	Proteomics	sams-4	0.00886852	no
WBGene00008654	-0.231777	0.0166862	0.070633	no	glp1ncl1 / glp1	Proteomics	F10F2.2	-0.177807	no
WBGene00018367	2.17205	0.0167157	0.0706599	no	glp1ncl1 / glp1	Proteomics	F42H10.3	0.140286	no
WBGene00021757	0.219678	0.0169256	0.071406	no	glp1ncl1 / glp1	Proteomics	taco-1	0.859734	yes
WBGene00015933	-1.10435	0.016939	0.071406	no	glp1ncl1 / glp1	Proteomics	C17H12.8	-0.773894	yes
WBGene00021868	-0.218349	0.017416	0.0733153	no	glp1ncl1 / glp1	Proteomics	atln-1	-0.140077	no
WBGene00011412	0.754229	0.0174485	0.0733508	no	glp1ncl1 / glp1	Proteomics	mrpl-16	0.86624	yes
WBGene00022673	-0.271352	0.0175671	0.0736465	no	glp1ncl1 / glp1	Proteomics	ZK177.8	-0.276764	yes
WBGene00000773	0.861612	0.0176793	0.0740155	no	glp1ncl1 / glp1	Proteomics	cpf-1	0.240571	no
WBGene00003090	-0.368032	0.0177285	0.0741196	no	glp1ncl1 / glp1	Proteomics	lys-1	-0.27445	no
WBGene00004436	0.179009	0.0177582	0.0741422	no	glp1ncl1 / glp1	Proteomics	rpl-24.1	0.508027	yes
WBGene00012903	-0.127236	0.0179543	0.0748588	no	glp1ncl1 / glp1	Proteomics	vps-2	-0.0717369	no
WBGene00002152	0.138081	0.018137	0.0755172	no	glp1ncl1 / glp1	Proteomics	iars-1	0.671777	yes
WBGene00021334	-0.182568	0.018222	0.0757679	no	glp1ncl1 / glp1	Proteomics	vps-4	-0.0688565	no
WBGene00016197	1.69329	0.0183209	0.0760755	no	glp1ncl1 / glp1	Proteomics	pxl-1	-0.11123	no
WBGene00014826	-0.323045	0.0185477	0.0768716	no	glp1ncl1 / glp1	Proteomics	R13H4.2	-0.705814	yes
WBGene00010304	0.804917	0.018563	0.0768716	no	glp1ncl1 / glp1	Proteomics	clpf-1	0.647554	no
WBGene00001603	-0.728712	0.0187626	0.0774304	no	glp1ncl1 / glp1	Proteomics	gln-2	#N/A	#N/A
WBGene00012992	0.265701	0.0187741	0.0774304	no	glp1ncl1 / glp1	Proteomics	mrpl-20	0.615829	yes
WBGene00000915	0.193054	0.018971	0.0781371	no	glp1ncl1 / glp1	Proteomics	daf-21	0.779639	yes
WBGene00022425	-0.991006	0.0191955	0.0788724	no	glp1ncl1 / glp1	Proteomics	plst-1	-0.388859	yes
WBGene00001153	-0.169092	0.0192012	0.0788724	no	glp1ncl1 / glp1	Proteomics	ech-4	-0.261044	yes
WBGene00008211	1.94246	0.0194576	0.0798182	no	glp1ncl1 / glp1	Proteomics	C49F5.7	-0.194521	no
WBGene00020190	0.242924	0.0194852	0.0798241	no	glp1ncl1 / glp1	Proteomics	guk-1	0.147383	no
WBGene00018008	-0.152388	0.0197285	0.0807123	no	glp1ncl1 / glp1	Proteomics	vpr-1	-0.155015	no
WBGene00010130	-0.20137	0.0197634	0.0807467	no	glp1ncl1 / glp1	Proteomics	vha-14	-0.224388	no
WBGene00009898	-0.386672	0.0198419	0.0809593	no	glp1ncl1 / glp1	Proteomics	dod-23	-0.399179	yes
WBGene00018811	-0.161305	0.01993	0.08121	no	glp1ncl1 / glp1	Proteomics	pmt-2	-0.0815413	no
WBGene00004274	-0.276852	0.0199682	0.0812573	no	glp1ncl1 / glp1	Proteomics	rab-11.1	-0.14226	no
WBGene00003171	-0.192051	0.0200404	0.0814424	no	glp1ncl1 / glp1	Proteomics	mec-7	-0.0806025	no
WBGene00016511	-0.246214	0.0201282	0.0816904	no	glp1ncl1 / glp1	Proteomics	C37H5.13	-0.173425	no
WBGene00007875	-0.695899	0.0202146	0.0819324	no	glp1ncl1 / glp1	Proteomics	dod-24	-0.272612	yes
WBGene00000835	-0.259949	0.0206362	0.08353	no	glp1ncl1 / glp1	Proteomics	cuc-1	-0.193577	no
WBGene00022200	-0.280091	0.0207029	0.0836891	no	glp1ncl1 / glp1	Proteomics	fard-1	-0.211877	no
WBGene00022045	1.62642	0.0207408	0.0837314	no	glp1ncl1 / glp1	Proteomics	mrpl-55	0.844854	yes
WBGene00006704	0.202537	0.0207843	0.0837963	no	glp1ncl1 / glp1	Proteomics	ubc-7	0.164352	no
WBGene00022127	-0.383051	0.021038	0.0847071	no	glp1ncl1 / glp1	Proteomics	yop-1	-0.0151076	no
WBGene00007010	-0.13017	0.0211469	0.084886	no	glp1ncl1 / glp1	Proteomics	alx-1	-0.075594	no
WBGene00001761	-0.319681	0.0211523	0.084886	no	glp1ncl1 / glp1	Proteomics	gst-13	-0.669554	yes
WBGene00001088	-0.243453	0.0211659	0.084886	no	glp1ncl1 / glp1	Proteomics	dpy-30	-0.132149	no
WBGene00010812	0.631422	0.021196	0.0848952	no	glp1ncl1 / glp1	Proteomics	mrpl-35	0.8496	yes
WBGene00020082	-0.216073	0.021241	0.0849642	no	glp1ncl1 / glp1	Proteomics	gcp-2.1	-0.444546	yes
WBGene00009668	0.348113	0.0214195	0.0855657	no	glp1ncl1 / glp1	Proteomics	cfim-1	0.463674	yes
WBGene00000765	-0.10959	0.154039	0.339687	no	glp1ncl1 / glp1	Proteomics	coq-5	0.0327737	no
WBGene00001694	-0.185726	0.021502	0.0855752	no	glp1ncl1 / glp1	Proteomics	grd-5	-0.713465	yes
WBGene00000100	-0.245137	0.021506	0.0855752	no	glp1ncl1 / glp1	Proteomics	ajm-1	-0.31584	yes
WBGene00000774	-0.695933	0.289166	0.500919	no	glp1ncl1 / glp1	Proteomics	cpf-2	0.120469	no
WBGene00014221	1.46456	0.021577	0.0856347	no	glp1ncl1 / glp1	Proteomics	ZK1098.4	0.597675	yes
WBGene00022148	1.22053	0.0216599	0.085852	no	glp1ncl1 / glp1	Proteomics	ddx-27	2.15742	yes
WBGene00020868	0.165341	0.0217075	0.085929	no	glp1ncl1 / glp1	Proteomics	eif-1	0.278819	no
WBGene00011338	1.21211	0.0218987	0.0865735	no	glp1ncl1 / glp1	Proteomics	sec-31	0.113776	no
WBGene00021470	0.712011	0.0219507	0.0866669	no	glp1ncl1 / glp1	Proteomics	tpxl-1	#N/A	#N/A
WBGene00020166	-0.214636	0.0221069	0.0871707	no	glp1ncl1 / glp1	Proteomics	T02G5.7	-0.300109	yes
WBGene00021005	-0.590276	0.0221853	0.0873673	no	glp1ncl1 / glp1	Proteomics	W03F11.1	-0.333439	yes
WBGene00016676	-0.223465	0.0222291	0.087427	no	glp1ncl1 / glp1	Proteomics	C45G9.5	-0.0799466	no
WBGene00001679	-0.28829	0.0224456	0.0881648	no	glp1ncl1 / glp1	Proteomics	gpb-1	-0.322592	no
WBGene00004020	-0.298205	0.0226228	0.0887464	no	glp1ncl1 / glp1	Proteomics	pho-1	-0.2575	yes
WBGene00001093	-0.209335	0.0227245	0.089031	no	glp1ncl1 / glp1	Proteomics	drp-1	-0.0687698	no
WBGene00001566	0.669089	0.0228388	0.0893641	no	glp1ncl1 / glp1	Proteomics	acdh-13	0.486962	yes
WBGene00008409	0.226191	0.0231128	0.0903205	no	glp1ncl1 / glp1	Proteomics	mpst-1	0.844889	yes
WBGene00011795	0.726465	0.0234531	0.0914603	no	glp1ncl1 / glp1	Proteomics	T16A9.5	0.247749	no
WBGene00017356	0.748987	0.0234644	0.0914603	no	glp1ncl1 / glp1	Proteomics	F10E9.4	2.42993	yes
WBGene00000785	-0.061051	0.518161	0.703336	no	glp1ncl1 / glp1	Proteomics	cpr-5	0.492814	yes
WBGene00000800	-0.0411115	0.481347	0.675384	no	glp1ncl1 / glp1	Proteomics	cars-1	0.115802	no
WBGene00009973	-0.207373	0.0239216	0.0928863	no	glp1ncl1 / glp1	Proteomics	F53C11.3	-0.0892751	no
WBGene00000802	-0.0527585	0.56462	0.733576	no	glp1ncl1 / glp1	Proteomics	crt-1	0.152949	no
WBGene00017780	-0.354106	0.0247825	0.0959851	no	glp1ncl1 / glp1	Proteomics	F25E2.2	-0.178912	no
WBGene00020391	0.176635	0.0248271	0.0960361	no	glp1ncl1 / glp1	Proteomics	cct-7	0.758918	yes
WBGene00021534	-0.132425	0.0249626	0.0964378	no	glp1ncl1 / glp1	Proteomics	mvk-1	-0.132399	no
WBGene00007175	-0.261856	0.0250321	0.0965076	no	glp1ncl1 / glp1	Proteomics	B0395.3	-0.496969	yes
WBGene00000813	-0.77431	0.076269	0.212967	no	glp1ncl1 / glp1	Proteomics	csn-1	0.0758531	no
WBGene00013037	-0.709843	0.0250755	0.0965076	no	glp1ncl1 / glp1	Proteomics	Y49E10.18	-0.172421	no
WBGene00000814	-1.38838	0.0235906	0.0918349	no	glp1ncl1 / glp1	Proteomics	csn-2	0.195552	no
WBGene00006929	-0.531315	0.0251839	0.096681	no	glp1ncl1 / glp1	Proteomics	vit-5	-0.549135	yes
WBGene00015956	-0.152334	0.0252586	0.0968457	no	glp1ncl1 / glp1	Proteomics	C18B2.5	-0.221191	no
WBGene00007216	-0.485225	0.0252949	0.0968633	no	glp1ncl1 / glp1	Proteomics	C01A2.4	-0.0774206	no
WBGene00007150	-0.415632	0.0254483	0.0972457	no	glp1ncl1 / glp1	Proteomics	acly-2	-0.0570069	no
WBGene00000818	-0.0681265	0.442796	0.642613	no	glp1ncl1 / glp1	Proteomics	csn-6	0.154181	no
WBGene00007330	-0.20344	0.025746	0.0981216	no	glp1ncl1 / glp1	Proteomics	C05C10.3	-0.370269	no
WBGene00008166	0.829468	0.025786	0.0981216	no	glp1ncl1 / glp1	Proteomics	saps-1	-0.106965	no
WBGene00009189	0.192881	0.0258002	0.0981216	no	glp1ncl1 / glp1	Proteomics	F27D4.4	0.731696	yes
WBGene00003982	-0.168661	0.0258164	0.0981216	no	glp1ncl1 / glp1	Proteomics	pes-9	-0.186637	no
WBGene00001113	0.179884	0.0260419	0.0988555	no	glp1ncl1 / glp1	Proteomics	dur-1	0.458911	no
WBGene00001196	-0.298561	0.02623	0.0994158	no	glp1ncl1 / glp1	Proteomics	egl-30	-0.387795	no
WBGene00018784	-0.286432	0.0262546	0.0994158	no	glp1ncl1 / glp1	Proteomics	F54A3.5	-0.192964	no
WBGene00018350	-0.181553	0.0265465	0.100397	no	glp1ncl1 / glp1	Proteomics	ifo-1	-0.0956787	no
WBGene00011045	-0.249223	0.0267999	0.101229	no	glp1ncl1 / glp1	Proteomics	gpx-2	-0.346233	yes
WBGene00020902	0.606312	0.0268943	0.10138	no	glp1ncl1 / glp1	Proteomics	jmjc-1	1.81107	yes
WBGene00022852	1.08882	0.0269301	0.10138	no	glp1ncl1 / glp1	Proteomics	ZK1127.5	2.54504	yes
WBGene00000836	-0.0228298	0.843279	0.909963	no	glp1ncl1 / glp1	Proteomics	cul-1	0.0150228	no
WBGene00012459	-0.195926	0.0269726	0.10138	no	glp1ncl1 / glp1	Proteomics	Y17G7B.3	-0.113467	no
WBGene00010605	-0.198936	0.0271612	0.101963	no	glp1ncl1 / glp1	Proteomics	K06G5.1	-0.287354	yes
WBGene00000843	-0.396143	0.662635	0.809833	no	glp1ncl1 / glp1	Proteomics	cup-2	0.12977	no
WBGene00001094	0.177832	0.0278507	0.104295	no	glp1ncl1 / glp1	Proteomics	dars-1	0.759991	yes
WBGene00000879	-0.0763432	0.399587	0.606465	no	glp1ncl1 / glp1	Proteomics	bath-36,cyn-3	0.0579914	no
WBGene00004156	-2.33705	0.0279872	0.104534	no	glp1ncl1 / glp1	Proteomics	pqn-74	#N/A	#N/A
WBGene00010766	0.25883	0.0280173	0.104534	no	glp1ncl1 / glp1	Proteomics	K11B4.1	0.844134	yes
WBGene00007969	-0.260875	0.0282201	0.105145	no	glp1ncl1 / glp1	Proteomics	acs-19	-0.488206	yes
WBGene00003495	-0.148231	0.0282498	0.105145	no	glp1ncl1 / glp1	Proteomics	mup-2	-0.221221	no
WBGene00021024	-0.205936	0.0283497	0.105388	no	glp1ncl1 / glp1	Proteomics	W04C9.2	-0.0643312	no
WBGene00012803	-0.186379	0.0285209	0.105758	no	glp1ncl1 / glp1	Proteomics	Y43F4B.5	-0.242184	yes
WBGene00021210	-0.32189	0.0285397	0.105758	no	glp1ncl1 / glp1	Proteomics	Y18H1A.4	-0.055669	no
WBGene00021367	-0.301993	0.0285833	0.105758	no	glp1ncl1 / glp1	Proteomics	Y37E11AM.3	-0.0273612	no
WBGene00044019	-0.273606	0.028588	0.105758	no	glp1ncl1 / glp1	Proteomics	C55A6.12	-0.168312	no
WBGene00000886	-0.169557	0.750919	0.863854	no	glp1ncl1 / glp1	Proteomics	cyn-10	0.366903	no
WBGene00016995	-0.159981	0.0287547	0.106048	no	glp1ncl1 / glp1	Proteomics	acly-1	-0.550502	yes
WBGene00021430	-0.168882	0.0287705	0.106048	no	glp1ncl1 / glp1	Proteomics	Y38F2AR.12	-0.207714	no
WBGene00019813	-0.245184	0.0288201	0.106102	no	glp1ncl1 / glp1	Proteomics	ger-1	-0.167405	no
WBGene00016447	0.549448	0.0291594	0.10718	no	glp1ncl1 / glp1	Proteomics	msd-4	0.5193	no
WBGene00019076	0.197923	0.0291831	0.10718	no	glp1ncl1 / glp1	Proteomics	mrpl-24	0.657444	yes
WBGene00000887	-0.223516	0.487976	0.6805	no	glp1ncl1 / glp1	Proteomics	cyn-11	0.28832	no
WBGene00020022	-0.155063	0.0297411	0.108869	no	glp1ncl1 / glp1	Proteomics	R12C12.1	-0.204936	no
WBGene00011050	0.366517	0.02975	0.108869	no	glp1ncl1 / glp1	Proteomics	agl-1	-0.109758	no
WBGene00003773	-0.16192	0.0299315	0.109402	no	glp1ncl1 / glp1	Proteomics	nlt-1	-0.219201	no
WBGene00019713	-0.146592	0.0300135	0.109571	no	glp1ncl1 / glp1	Proteomics	pqn-52	-0.228176	no
WBGene00001598	1.29862	0.0302132	0.110168	no	glp1ncl1 / glp1	Proteomics	glh-1	1.31225	yes
WBGene00009367	0.578507	0.0303148	0.110318	no	glp1ncl1 / glp1	Proteomics	F33H2.3	0.785875	yes
WBGene00006833	-0.222084	0.0303331	0.110318	no	glp1ncl1 / glp1	Proteomics	unc-108	-0.206963	no
WBGene00000891	-0.470996	0.236959	0.442054	no	glp1ncl1 / glp1	Proteomics	cyn-15	0.129292	no
WBGene00001819	-0.228685	0.030433	0.110318	no	glp1ncl1 / glp1	Proteomics	haf-9	-0.0517699	no
WBGene00001774	-0.309389	0.0304351	0.110318	no	glp1ncl1 / glp1	Proteomics	gst-26	-0.341382	yes
WBGene00015326	-0.15164	0.0307912	0.111476	no	glp1ncl1 / glp1	Proteomics	ivd-1	-0.241484	no
WBGene00012434	-0.190735	0.0309299	0.111846	no	glp1ncl1 / glp1	Proteomics	Y11D7A.10	-0.0972149	no
WBGene00010196	-1.47844	0.0310969	0.112317	no	glp1ncl1 / glp1	Proteomics	F57C2.4	-0.320283	yes
WBGene00004059	-0.721246	0.0312376	0.112692	no	glp1ncl1 / glp1	Proteomics	pmp-2	-0.263105	yes
WBGene00000928	-0.0913994	0.530745	0.712328	no	glp1ncl1 / glp1	Proteomics	dao-2	0.930836	yes
WBGene00000967	-0.350938	0.03137	0.112789	no	glp1ncl1 / glp1	Proteomics	dhs-3	-0.534577	yes
WBGene00000929	-0.142243	0.0907048	0.238032	no	glp1ncl1 / glp1	Proteomics	dao-3	0.0884576	no
WBGene00003053	-0.206659	0.0314123	0.112789	no	glp1ncl1 / glp1	Proteomics	lmp-1	-0.161196	no
WBGene00011629	-0.133892	0.0315222	0.11305	no	glp1ncl1 / glp1	Proteomics	T08G11.1	-0.213921	no
WBGene00007616	0.572851	0.0318609	0.114131	no	glp1ncl1 / glp1	Proteomics	rpoa-12	2.03467	yes
WBGene00008528	0.393341	0.0320835	0.114793	no	glp1ncl1 / glp1	Proteomics	F02E9.1	0.0132458	no
WBGene00022089	-0.143965	0.0322108	0.115053	no	glp1ncl1 / glp1	Proteomics	Y69A2AR.18	-0.00405354	no
WBGene00020446	-0.246415	0.0322316	0.115053	no	glp1ncl1 / glp1	Proteomics	T12B3.3	-0.15772	no
WBGene00022855	0.27931	0.0324266	0.115615	no	glp1ncl1 / glp1	Proteomics	tcer-1	0.0310889	no
WBGene00003904	0.127393	0.0325345	0.115853	no	glp1ncl1 / glp1	Proteomics	pabp-2	0.136305	no
WBGene00015413	-0.128515	0.0326066	0.115853	no	glp1ncl1 / glp1	Proteomics	pdhb-1	-0.110002	no
WBGene00019663	-0.310372	0.0326237	0.115853	no	glp1ncl1 / glp1	Proteomics	K11H12.7	-0.30076	yes
WBGene00012557	-0.581221	0.0326455	0.115853	no	glp1ncl1 / glp1	Proteomics	Y37D8A.19	-0.454736	yes
WBGene00021263	-0.905875	0.0335182	0.118812	no	glp1ncl1 / glp1	Proteomics	Y22D7AR.10	-0.227965	no
WBGene00006910	0.575601	0.0336217	0.119041	no	glp1ncl1 / glp1	Proteomics	vha-1	-0.244436	yes
WBGene00022031	-0.181433	0.0342868	0.121255	no	glp1ncl1 / glp1	Proteomics	Y65B4A.8	-0.058775	no
[truncated: 2,166 more rows]
