# Supplementary material
Source: Research Square preprint supplement (doi:10.21203/rs.3.rs-9541370/v1)
Supplement: Supplementary file 8 [file 86bb83ccda3431f9d179d29c.xlsx]

## Sheet: david_up
Category	Term	Count	%	PValue	Genes	List Total	Pop Hits	Pop Total	Fold Enrichment	Bonferroni	Benjamini	FDR
GOTERM_CC_DIRECT	GO:0005730~nucleolus	27	9.44056	6.69201e-19	WBGENE00018893, WBGENE00020695, WBGENE00022378, WBGENE00016790, WBGENE00011043, WBGENE00022739, WBGENE00011538, WBGENE00016508, WBGENE00022021, WBGENE00010627, WBGENE00011311, WBGENE00020389, WBGENE00016740, WBGENE00021276, WBGENE00022046, WBGENE00015232, WBGENE00000276, WBGENE00001423, WBGENE00004681, WBGENE00004185, WBGENE00007050, WBGENE00015941, WBGENE00013544, WBGENE00017347, WBGENE00013128,…	186	182	12839	10.2403	1.05065e-16	1.05065e-16	1.02388e-14
GOTERM_BP_DIRECT	GO:0042254~ribosome biogenesis	14	4.8951	7.83576e-12	WBGENE00018893, WBGENE00022046, WBGENE00016740, WBGENE00022739, WBGENE00004185, WBGENE00015941, WBGENE00022021, WBGENE00013544, WBGENE00013236, WBGENE00009132, WBGENE00012059, WBGENE00010627, WBGENE00017347, WBGENE00012676	171	57	10016	14.3864	2.9384e-09	1.80271e-09	1.80271e-07
GOTERM_BP_DIRECT	GO:0006364~rRNA processing	16	5.59441	9.64017e-12	WBGENE00018893, WBGENE00022378, WBGENE00021276, WBGENE00022046, WBGENE00016740, WBGENE00000276, WBGENE00001001, WBGENE00022739, WBGENE00009329, WBGENE00001423, WBGENE00004185, WBGENE00015941, WBGENE00013544, WBGENE00009132, WBGENE00012059, WBGENE00017347	171	85	10016	11.0255	3.61507e-09	1.80271e-09	1.80271e-07
KEGG_PATHWAY	cel03008:Ribosome biogenesis in eukaryotes	12	4.1958	1.55015e-08	WBGENE00010732, WBGENE00021276, WBGENE00022046, WBGENE00016740, WBGENE00012030, WBGENE00011043, WBGENE00022021, WBGENE00013544, WBGENE00010627, WBGENE00022739, WBGENE00021843, WBGENE00001423	48	82	3147	9.59451	6.35562e-07	6.35562e-07	6.35562e-05
GOTERM_CC_DIRECT	GO:0005634~nucleus	73	25.5245	4.73681e-08	WBGENE00018893, WBGENE00017683, WBGENE00018892, WBGENE00020695, WBGENE00022279, WBGENE00022434, WBGENE00012030, WBGENE00017162, WBGENE00017085, WBGENE00007444, WBGENE00016508, WBGENE00015816, WBGENE00008413, WBGENE00003682, WBGENE00012343, WBGENE00016624, WBGENE00013236, WBGENE00021392, WBGENE00010845, WBGENE00017990, WBGENE00020389, WBGENE00016740, WBGENE00021276, WBGENE00018369, WBGENE00022046,…	186	2762	12839	1.82439	7.43677e-06	3.7184e-06	0.000362366
GOTERM_CC_DIRECT	GO:0032040~small-subunit processome	8	2.7972	3.83305e-06	WBGENE00016740, WBGENE00010582, WBGENE00007050, WBGENE00013544, WBGENE00010627, WBGENE00022739, WBGENE00011311, WBGENE00001423	186	46	12839	12.0047	0.00060161	0.000200597	0.0195486
GOTERM_BP_DIRECT	GO:0000462~maturation of SSU-rRNA from tricistronic rRNA transcript (SSU-rRNA, 5.8S rRNA, LSU-rRNA)	6	2.0979	6.96678e-06	WBGENE00020389, WBGENE00010582, WBGENE00022021, WBGENE00022739, WBGENE00011311, WBGENE00015525	171	17	10016	20.6729	0.00260914	0.000868526	0.0868526
GOTERM_MF_DIRECT	GO:0003724~RNA helicase activity	8	2.7972	1.39172e-05	WBGENE00007444, WBGENE00022378, WBGENE00004880, WBGENE00015232, WBGENE00011032, WBGENE00012059, WBGENE00017162, WBGENE00015525	163	50	10043	9.85816	0.00373676	0.0023489	0.227904
GOTERM_MF_DIRECT	GO:0003723~RNA binding	22	7.69231	2.01088e-05	WBGENE00022378, WBGENE00022046, WBGENE00016740, WBGENE00011032, WBGENE00011043, WBGENE00015232, WBGENE00006968, WBGENE00000550, WBGENE00001001, WBGENE00019241, WBGENE00016171, WBGENE00001423, WBGENE00001484, WBGENE00004880, WBGENE00006331, WBGENE00012343, WBGENE00016624, WBGENE00009132, WBGENE00012059, WBGENE00014018, WBGENE00015525, WBGENE00015943	163	469	10043	2.89019	0.00539472	0.0023489	0.227904
PFAM	PF00271:Helicase_C	9	3.14685	2.63324e-05	WBGENE00007444, WBGENE00022378, WBGENE00006961, WBGENE00015232, WBGENE00011032, WBGENE00012059, WBGENE00017162, WBGENE00010845, WBGENE00015525	209	79	13642	7.43613	0.00739834	0.00745208	0.745208
GOTERM_MF_DIRECT	GO:0140665~ATP-dependent H3-H4 histone complex chaperone activity	8	2.7972	4.701e-05	WBGENE00007444, WBGENE00022378, WBGENE00006961, WBGENE00004880, WBGENE00015232, WBGENE00012059, WBGENE00010845, WBGENE00015525	163	60	10043	8.21513	0.0125664	0.0023489	0.227904
GOTERM_MF_DIRECT	GO:0140584~chromatin extrusion motor activity	8	2.7972	4.701e-05	WBGENE00007444, WBGENE00022378, WBGENE00006961, WBGENE00004880, WBGENE00015232, WBGENE00012059, WBGENE00010845, WBGENE00015525	163	60	10043	8.21513	0.0125664	0.0023489	0.227904
GOTERM_MF_DIRECT	GO:0061775~cohesin loader activity	8	2.7972	5.23918e-05	WBGENE00007444, WBGENE00022378, WBGENE00006961, WBGENE00004880, WBGENE00015232, WBGENE00012059, WBGENE00010845, WBGENE00015525	163	61	10043	8.08046	0.0139949	0.0023489	0.227904
GOTERM_MF_DIRECT	GO:0140849~ATP-dependent H2AZ histone chaperone activity	8	2.7972	5.23918e-05	WBGENE00007444, WBGENE00022378, WBGENE00006961, WBGENE00004880, WBGENE00015232, WBGENE00012059, WBGENE00010845, WBGENE00015525	163	61	10043	8.08046	0.0139949	0.0023489	0.227904
GOTERM_MF_DIRECT	GO:0004386~helicase activity	10	3.4965	8.4344e-05	WBGENE00007444, WBGENE00022378, WBGENE00006961, WBGENE00004880, WBGENE00015232, WBGENE00011032, WBGENE00012059, WBGENE00017162, WBGENE00010845, WBGENE00015525	163	113	10043	5.45252	0.022434	0.0029396	0.285218
GOTERM_MF_DIRECT	GO:0003689~DNA clamp loader activity	8	2.7972	8.74231e-05	WBGENE00007444, WBGENE00022378, WBGENE00006961, WBGENE00004880, WBGENE00015232, WBGENE00012059, WBGENE00010845, WBGENE00015525	163	66	10043	7.4683	0.0232434	0.0029396	0.285218
GOTERM_MF_DIRECT	GO:0016887~ATP hydrolysis activity	14	4.8951	0.00012705	WBGENE00022378, WBGENE00012360, WBGENE00001816, WBGENE00015232, WBGENE00004978, WBGENE00004064, WBGENE00007444, WBGENE00006961, WBGENE00001086, WBGENE00004880, WBGENE00018339, WBGENE00012059, WBGENE00010845, WBGENE00015525	163	239	10043	3.60916	0.0336011	0.00379738	0.368445
PFAM	PF18457:PUD1_2	4	1.3986	0.000184913	WBGENE00021236, WBGENE00017500, WBGENE00017499, WBGENE00017490	209	8	13642	32.6364	0.0508138	0.0261652	2.61652
GOTERM_BP_DIRECT	GO:0042273~ribosomal large subunit biogenesis	5	1.74825	0.000313829	WBGENE00018893, WBGENE00011538, WBGENE00015941, WBGENE00017347, WBGENE00012676	171	20	10016	14.6433	0.111041	0.029343	2.9343
GOTERM_MF_DIRECT	GO:0030515~snoRNA binding	4	1.3986	0.000454922	WBGENE00016740, WBGENE00000276, WBGENE00010627, WBGENE00022739	163	10	10043	24.6454	0.115207	0.0122374	1.18735
GOTERM_CC_DIRECT	GO:0030687~preribosome, large subunit precursor	4	1.3986	0.00143555	WBGENE00018893, WBGENE00011538, WBGENE00015941, WBGENE00017347	186	16	12839	17.2567	0.201917	0.0563452	5.49097
PFAM	PF00270:DEAD	6	2.0979	0.00172781	WBGENE00022378, WBGENE00015232, WBGENE00011032, WBGENE00012059, WBGENE00017162, WBGENE00015525	209	57	13642	6.87081	0.385941	0.16299	16.299
GOTERM_CC_DIRECT	GO:1990904~ribonucleoprotein complex	10	3.4965	0.00290022	WBGENE00010732, WBGENE00022046, WBGENE00016740, WBGENE00006331, WBGENE00012244, WBGENE00013544, WBGENE00009132, WBGENE00022739, WBGENE00009329, WBGENE00001423	186	205	12839	3.36716	0.366184	0.0910669	8.87468
GOTERM_MF_DIRECT	GO:0003676~nucleic acid binding	14	4.8951	0.00337859	WBGENE00022378, WBGENE00014220, WBGENE00011032, WBGENE00011043, WBGENE00015232, WBGENE00017162, WBGENE00019241, WBGENE00001484, WBGENE00007133, WBGENE00006331, WBGENE00016624, WBGENE00012059, WBGENE00015525, WBGENE00015943	163	340	10043	2.53703	0.597628	0.0826219	8.01647
GOTERM_CC_DIRECT	GO:0030686~90S preribosome	3	1.04895	0.00546144	WBGENE00010582, WBGENE00007050, WBGENE00022739	186	8	12839	25.8851	0.576752	0.142908	13.9267
GOTERM_CC_DIRECT	GO:0005654~nucleoplasm	7	2.44755	0.00690052	WBGENE00018893, WBGENE00004185, WBGENE00016057, WBGENE00001001, WBGENE00017085, WBGENE00001423, WBGENE00016978	186	117	12839	4.12981	0.662819	0.154769	15.0826
GOTERM_MF_DIRECT	GO:0016787~hydrolase activity	17	5.94406	0.0100584	WBGENE00022378, WBGENE00011032, WBGENE00015232, WBGENE00004259, WBGENE00001661, WBGENE00007508, WBGENE00001112, WBGENE00017162, WBGENE00007444, WBGENE00006961, WBGENE00010267, WBGENE00004880, WBGENE00021371, WBGENE00017515, WBGENE00012059, WBGENE00010845, WBGENE00015525	163	522	10043	2.00657	0.934086	0.225476	21.877
GOTERM_CC_DIRECT	GO:0043186~P granule	6	2.0979	0.0147381	WBGENE00022378, WBGENE00003918, WBGENE00015232, WBGENE00012059, WBGENE00017162, WBGENE00015943	186	100	12839	4.14161	0.902812	0.289236	28.1867
GOTERM_MF_DIRECT	GO:0005524~ATP binding	26	9.09091	0.016581	WBGENE00022378, WBGENE00001816, WBGENE00006968, WBGENE00017162, WBGENE00019064, WBGENE00001533, WBGENE00003777, WBGENE00007444, WBGENE00001121, WBGENE00009543, WBGENE00001086, WBGENE00010845, WBGENE00018508, WBGENE00012360, WBGENE00015232, WBGENE00011032, WBGENE00004259, WBGENE00003400, WBGENE00004978, WBGENE00007724, WBGENE00004064, WBGENE00006961, WBGENE00004880, WBGENE00018339, WBGENE00012059,…	163	995	10043	1.61	0.988865	0.343099	33.2895
GOTERM_BP_DIRECT	GO:0000463~maturation of LSU-rRNA from tricistronic rRNA transcript (SSU-rRNA, 5.8S rRNA, LSU-rRNA)	3	1.04895	0.0169039	WBGENE00018893, WBGENE00006489, WBGENE00015232	171	12	10016	14.6433	0.998327	1	100
PFAM	PF00076:RRM_1	6	2.0979	0.0176976	WBGENE00001484, WBGENE00011043, WBGENE00006331, WBGENE00016624, WBGENE00019241, WBGENE00015943	209	99	13642	3.95592	0.993497	1	100
GOTERM_BP_DIRECT	GO:0007506~gonadal mesoderm development	3	1.04895	0.0197569	WBGENE00004185, WBGENE00003918, WBGENE00012676	171	13	10016	13.5169	0.999437	1	100
GOTERM_CC_DIRECT	GO:0016460~myosin II complex	3	1.04895	0.0271565	WBGENE00003370, WBGENE00019064, WBGENE00003777	186	18	12839	11.5045	0.986734	0.40837	39.7966
GOTERM_CC_DIRECT	GO:0034455~t-UTP complex	2	0.699301	0.0286119	WBGENE00010582, WBGENE00022739	186	2	12839	69.0269	0.989513	0.40837	39.7966
GOTERM_CC_DIRECT	GO:0001726~ruffle	2	0.699301	0.0286119	WBGENE00006771, WBGENE00012016	186	2	12839	69.0269	0.989513	0.40837	39.7966
GOTERM_BP_DIRECT	GO:0000184~nuclear-transcribed mRNA catabolic process, nonsense-mediated decay	3	1.04895	0.029403	WBGENE00004880, WBGENE00012343, WBGENE00015943	171	16	10016	10.9825	0.999986	1	100
PFAM	PF04410:Gar1	2	0.699301	0.0302627	WBGENE00022046, WBGENE00009132	209	2	13642	65.2727	0.999828	1	100
GOTERM_BP_DIRECT	GO:0006338~chromatin remodeling	7	2.44755	0.0338421	WBGENE00006961, WBGENE00021392, WBGENE00010845, WBGENE00007813, WBGENE00001423, WBGENE00045419, WBGENE00007724	171	142	10016	2.88741	0.999998	1	100
GOTERM_CC_DIRECT	GO:0030425~dendrite	6	2.0979	0.0387813	WBGENE00006412, WBGENE00001121, WBGENE00004121, WBGENE00012343, WBGENE00016611, WBGENE00001555	186	129	12839	3.21055	0.997991	0.507389	49.4461
GOTERM_CC_DIRECT	GO:0034457~Mpp10 complex	2	0.699301	0.0426111	WBGENE00016740, WBGENE00013544	186	3	12839	46.0179	0.998926	0.51461	50.1499
GOTERM_BP_DIRECT	GO:0006520~amino acid metabolic process	3	1.04895	0.0445493	WBGENE00004259, WBGENE00007508, WBGENE00011436	171	20	10016	8.78596	1	1	100
GOTERM_BP_DIRECT	GO:0007281~germ cell development	4	1.3986	0.0452116	WBGENE00017683, WBGENE00018892, WBGENE00004185, WBGENE00017162	171	47	10016	4.98494	1	1	100
GOTERM_CC_DIRECT	GO:0016459~myosin complex	3	1.04895	0.0463177	WBGENE00003370, WBGENE00019064, WBGENE00003777	186	24	12839	8.62836	0.999416	0.51942	50.6186
GOTERM_CC_DIRECT	GO:0005732~sno(s)RNA-containing ribonucleoprotein complex	2	0.699301	0.0564095	WBGENE00013544, WBGENE00009132	186	4	12839	34.5134	0.99989	0.553518	53.9416
GOTERM_CC_DIRECT	GO:0031428~box C/D methylation guide snoRNP complex	2	0.699301	0.0564095	WBGENE00010627, WBGENE00001423	186	4	12839	34.5134	0.99989	0.553518	53.9416
PFAM	PF00176:SNF2-rel_dom	3	1.04895	0.0632975	WBGENE00006961, WBGENE00010845, WBGENE00007724	209	27	13642	7.25253	1	1	100
GOTERM_BP_DIRECT	GO:0000055~ribosomal large subunit export from nucleus	2	0.699301	0.066192	WBGENE00012030, WBGENE00012676	171	4	10016	29.2865	1	1	100
GOTERM_BP_DIRECT	GO:0045943~positive regulation of transcription by RNA polymerase I	2	0.699301	0.066192	WBGENE00021276, WBGENE00022739	171	4	10016	29.2865	1	1	100
GOTERM_MF_DIRECT	GO:0005525~GTP binding	8	2.7972	0.0679142	WBGENE00010732, WBGENE00016583, WBGENE00013001, WBGENE00022021, WBGENE00001661, WBGENE00003400, WBGENE00001555, WBGENE00001533	163	222	10043	2.22031	1	1	97.3881
GOTERM_MF_DIRECT	GO:0140658~ATP-dependent chromatin remodeler activity	3	1.04895	0.0697938	WBGENE00006961, WBGENE00010845, WBGENE00007724	163	27	10043	6.84594	1	1	97.3881
PFAM	PF00531:Death	2	0.699301	0.0739561	WBGENE00003400, WBGENE00006745	209	5	13642	26.1091	1	1	100
GOTERM_MF_DIRECT	GO:0036121~double-stranded DNA helicase activity	3	1.04895	0.0743901	WBGENE00006961, WBGENE00004880, WBGENE00010845	163	28	10043	6.60145	1	1	97.3881
GOTERM_BP_DIRECT	GO:0008406~gonad development	4	1.3986	0.0753353	WBGENE00004185, WBGENE00006961, WBGENE00003918, WBGENE00001651	171	58	10016	4.03952	1	1	100
GOTERM_BP_DIRECT	GO:0006397~mRNA processing	6	2.0979	0.0796871	WBGENE00235102, WBGENE00022434, WBGENE00009320, WBGENE00012343, WBGENE00016624, WBGENE00017085	171	135	10016	2.60325	1	1	100
GOTERM_BP_DIRECT	GO:0000492~box C/D snoRNP assembly	2	0.699301	0.0820478	WBGENE00006489, WBGENE00009329	171	5	10016	23.4292	1	1	100
GOTERM_CC_DIRECT	GO:0005681~spliceosomal complex	4	1.3986	0.0827337	WBGENE00235102, WBGENE00022434, WBGENE00009320, WBGENE00012343	186	71	12839	3.88884	0.999999	0.76407	74.4603
GOTERM_BP_DIRECT	GO:0008380~RNA splicing	5	1.74825	0.08515	WBGENE00235102, WBGENE00022434, WBGENE00009320, WBGENE00012343, WBGENE00017162	171	98	10016	2.98842	1	1	100
GOTERM_MF_DIRECT	GO:0016829~lyase activity	5	1.74825	0.0896327	WBGENE00011527, WBGENE00000283, WBGENE00001555, WBGENE00001533, WBGENE00011436	163	105	10043	2.93398	1	1	97.3881
PFAM	PF00917:MATH	4	1.3986	0.0911966	WBGENE00015608, WBGENE00018102, WBGENE00020329, WBGENE00020073	209	70	13642	3.72987	1	1	100
GOTERM_MF_DIRECT	GO:0046872~metal ion binding	37	12.9371	0.0944347	WBGENE00022873, WBGENE00021763, WBGENE00008809, WBGENE00001555, WBGENE00007813, WBGENE00021843, WBGENE00045419, WBGENE00007488, WBGENE00008810, WBGENE00015915, WBGENE00015816, WBGENE00001121, WBGENE00003682, WBGENE00021371, WBGENE00014300, WBGENE00013236, WBGENE00011677, WBGENE00018420, WBGENE00016583, WBGENE00018369, WBGENE00012360, WBGENE00022363, WBGENE00003688, WBGENE00004259, WBGENE00007508,…	163	1802	10043	1.26509	1	1	97.3881
GOTERM_BP_DIRECT	GO:0017183~protein histidyl modification to diphthamide	2	0.699301	0.0976358	WBGENE00007488, WBGENE00007194	171	6	10016	19.5244	1	1	100
PFAM	PF00400:WD40	5	1.74825	0.0990136	WBGENE00018893, WBGENE00017683, WBGENE00004185, WBGENE00021276, WBGENE00013735	209	115	13642	2.83794	1	1	100

## Sheet: david_down
Category	Term	Count	%	PValue	Genes	List Total	Pop Hits	Pop Total	Fold Enrichment	Bonferroni	Benjamini	FDR
GOTERM_BP_DIRECT	GO:0007268~chemical synaptic transmission	12	1.49254	0.00731979	WBGENE00021897, WBGENE00012857, WBGENE00006752, WBGENE00022247, WBGENE00001053, WBGENE00000045, WBGENE00001147, WBGENE00003774, WBGENE00000057, WBGENE00022283, WBGENE00004779, WBGENE00002974	464	102	10016	2.53955	0.997833	1	100
PFAM	PF01391:Collagen	13	1.61692	0.0115012	WBGENE00000757, WBGENE00000668, WBGENE00000602, WBGENE00000638, WBGENE00000609, WBGENE00005018, WBGENE00000653, WBGENE00000675, WBGENE00000645, WBGENE00000656, WBGENE00000601, WBGENE00000754, WBGENE00000681	554	140	13642	2.28657	0.997259	1	100
PFAM	PF01484:Col_cuticle_N	14	1.74129	0.0126812	WBGENE00000757, WBGENE00000668, WBGENE00000602, WBGENE00000638, WBGENE00000609, WBGENE00005018, WBGENE00000653, WBGENE00000675, WBGENE00000645, WBGENE00000656, WBGENE00000601, WBGENE00000754, WBGENE00001072, WBGENE00000681	554	159	13642	2.1682	0.99851	1	100
GOTERM_MF_DIRECT	GO:0038023~signaling receptor activity	7	0.870647	0.0134278	WBGENE00010993, WBGENE00001053, WBGENE00003252, WBGENE00006605, WBGENE00003774, WBGENE00001612, WBGENE00004779	454	44	10043	3.51927	0.999091	1	100
GOTERM_CC_DIRECT	GO:0016607~nuclear speck	6	0.746269	0.0135733	WBGENE00044068, WBGENE00006697, WBGENE00006807, WBGENE00014153, WBGENE00021473, WBGENE00011333	563	33	12839	4.14629	0.980998	1	100
KEGG_PATHWAY	cel04144:Endocytosis	11	1.36816	0.0139257	WBGENE00004829, WBGENE00015508, WBGENE00001130, WBGENE00000199, WBGENE00012386, WBGENE00000894, WBGENE00011972, WBGENE00021538, WBGENE00006931, WBGENE00007009, WBGENE00019726	133	108	3147	2.40998	0.780093	1	100
GOTERM_BP_DIRECT	GO:0006879~intracellular iron ion homeostasis	4	0.497512	0.0157999	WBGENE00044026, WBGENE00017062, WBGENE00004877, WBGENE00001501	464	12	10016	7.1954	0.999998	1	100
PFAM	PF00001:7tm_1	12	1.49254	0.0165689	WBGENE00017661, WBGENE00015263, WBGENE00021897, WBGENE00000085, WBGENE00016246, WBGENE00001053, WBGENE00011582, WBGENE00019444, WBGENE00006428, WBGENE00017338, WBGENE00022736, WBGENE00004779	554	130	13642	2.27304	0.999801	1	100
GOTERM_CC_DIRECT	GO:0005886~plasma membrane	90	11.194	0.0177378	WBGENE00015263, WBGENE00018138, WBGENE00022154, WBGENE00011582, WBGENE00006428, WBGENE00000045, WBGENE00006748, WBGENE00000002, WBGENE00001651, WBGENE00001612, WBGENE00003999, WBGENE00006942, WBGENE00003998, WBGENE00006668, WBGENE00003086, WBGENE00000092, WBGENE00006675, WBGENE00006752, WBGENE00006671, WBGENE00006594, WBGENE00022283, WBGENE00022247, WBGENE00020784, WBGENE00013353, WBGENE00022682,…	563	1641	12839	1.25071	0.994429	1	100
GOTERM_CC_DIRECT	GO:0045202~synapse	20	2.48756	0.0187155	WBGENE00021897, WBGENE00022247, WBGENE00006807, WBGENE00000045, WBGENE00001147, WBGENE00004457, WBGENE00004897, WBGENE00003774, WBGENE00000057, WBGENE00001612, WBGENE00004779, WBGENE00002974, WBGENE00002084, WBGENE00010259, WBGENE00012857, WBGENE00006752, WBGENE00000481, WBGENE00001130, WBGENE00001053, WBGENE00022283	563	258	12839	1.7678	0.995826	1	100
GOTERM_BP_DIRECT	GO:0006811~monoatomic ion transport	18	2.23881	0.0215596	WBGENE00022247, WBGENE00014261, WBGENE00022682, WBGENE00016343, WBGENE00000045, WBGENE00006748, WBGENE00003774, WBGENE00009929, WBGENE00001651, WBGENE00000057, WBGENE00001612, WBGENE00006832, WBGENE00002974, WBGENE00004877, WBGENE00012857, WBGENE00009513, WBGENE00001374, WBGENE00022283	464	215	10016	1.80722	1	1	100
GOTERM_MF_DIRECT	GO:0046872~metal ion binding	98	12.1891	0.0299953	WBGENE00018413, WBGENE00018412, WBGENE00015264, WBGENE00044026, WBGENE00003674, WBGENE00002985, WBGENE00008209, WBGENE00003678, WBGENE00012703, WBGENE00003044, WBGENE00014208, WBGENE00000438, WBGENE00003707, WBGENE00022881, WBGENE00006538, WBGENE00007509, WBGENE00022805, WBGENE00000830, WBGENE00003669, WBGENE00006779, WBGENE00004086, WBGENE00003156, WBGENE00006384, WBGENE00001250, WBGENE00008684,…	454	1802	10043	1.20304	1	1	100
GOTERM_BP_DIRECT	GO:0055085~transmembrane transport	30	3.73134	0.0305217	WBGENE00013083, WBGENE00015381, WBGENE00018138, WBGENE00017861, WBGENE00017464, WBGENE00001817, WBGENE00000002, WBGENE00001651, WBGENE00006865, WBGENE00003999, WBGENE00003998, WBGENE00013439, WBGENE00016588, WBGENE00011456, WBGENE00014261, WBGENE00021158, WBGENE00019550, WBGENE00013353, WBGENE00016343, WBGENE00010282, WBGENE00009929, WBGENE00000477, WBGENE00003569, WBGENE00011329, WBGENE00009513,…	464	436	10016	1.48529	1	1	100
GOTERM_CC_DIRECT	GO:0097038~perinuclear endoplasmic reticulum	3	0.373134	0.0346963	WBGENE00001612, WBGENE00012930, WBGENE00000843	563	7	12839	9.77341	0.999964	1	100
GOTERM_CC_DIRECT	GO:0043005~neuron projection	17	2.11443	0.0347949	WBGENE00022247, WBGENE00014054, WBGENE00000045, WBGENE00004897, WBGENE00003774, WBGENE00000057, WBGENE00001612, WBGENE00021328, WBGENE00006436, WBGENE00002974, WBGENE00006779, WBGENE00002084, WBGENE00012857, WBGENE00000481, WBGENE00004212, WBGENE00001196, WBGENE00022283	563	222	12839	1.7463	0.999965	1	100
GOTERM_BP_DIRECT	GO:0007614~short-term memory	4	0.497512	0.0411762	WBGENE00001515, WBGENE00007546, WBGENE00001612, WBGENE00021238	464	17	10016	5.07911	1	1	100
GOTERM_MF_DIRECT	GO:0016874~ligase activity	8	0.995025	0.0429794	WBGENE00017012, WBGENE00001527, WBGENE00022881, WBGENE00004341, WBGENE00021508, WBGENE00013433, WBGENE00002985, WBGENE00004190	454	72	10043	2.45791	1	1	100
GOTERM_BP_DIRECT	GO:0000278~mitotic cell cycle	7	0.870647	0.0436032	WBGENE00003086, WBGENE00007258, WBGENE00001087, WBGENE00006540, WBGENE00006538, WBGENE00006528, WBGENE00001651	464	56	10016	2.69828	1	1	100
KEGG_PATHWAY	cel04145:Phagosome	7	0.870647	0.0436167	WBGENE00006538, WBGENE00013311, WBGENE00000067, WBGENE00006528, WBGENE00016258, WBGENE00020507, WBGENE00000776	133	62	3147	2.67148	0.991904	1	100
GOTERM_MF_DIRECT	GO:0042302~structural constituent of cuticle	14	1.74129	0.0437148	WBGENE00000757, WBGENE00000668, WBGENE00000602, WBGENE00000638, WBGENE00000609, WBGENE00005018, WBGENE00000653, WBGENE00000675, WBGENE00000645, WBGENE00000656, WBGENE00000601, WBGENE00000754, WBGENE00001072, WBGENE00000681	454	170	10043	1.82174	1	1	100
GOTERM_CC_DIRECT	GO:0005581~collagen trimer	14	1.74129	0.0438121	WBGENE00000757, WBGENE00000668, WBGENE00000602, WBGENE00000638, WBGENE00000609, WBGENE00005018, WBGENE00000653, WBGENE00000675, WBGENE00000645, WBGENE00000656, WBGENE00000601, WBGENE00000754, WBGENE00001072, WBGENE00000681	563	175	12839	1.82437	0.999998	1	100
GOTERM_MF_DIRECT	GO:0008188~neuropeptide receptor activity	6	0.746269	0.0467707	WBGENE00009931, WBGENE00000085, WBGENE00007395, WBGENE00016246, WBGENE00006428, WBGENE00010191	454	44	10043	3.01652	1	1	100
PFAM	PF13086:AAA_11	3	0.373134	0.0488784	WBGENE00008099, WBGENE00014965, WBGENE00014208	554	9	13642	8.20818	1	1	100
PFAM	PF13087:AAA_12	3	0.373134	0.0488784	WBGENE00008099, WBGENE00014965, WBGENE00014208	554	9	13642	8.20818	1	1	100
PFAM	PF05823:Gp-FAR-1	3	0.373134	0.0488784	WBGENE00001391, WBGENE00001390, WBGENE00001387	554	9	13642	8.20818	1	1	100
GOTERM_BP_DIRECT	GO:0006376~mRNA splice site recognition	3	0.373134	0.0496157	WBGENE00022489, WBGENE00006807, WBGENE00016811	464	8	10016	8.09483	1	1	100
GOTERM_BP_DIRECT	GO:0007567~parturition	3	0.373134	0.0496157	WBGENE00004310, WBGENE00020317, WBGENE00018590	464	8	10016	8.09483	1	1	100
PFAM	PF00083:Sugar_tr	6	0.746269	0.0509941	WBGENE00013083, WBGENE00013439, WBGENE00015381, WBGENE00019550, WBGENE00009350, WBGENE00006865	554	50	13642	2.95495	1	1	100
GOTERM_MF_DIRECT	GO:0005216~monoatomic ion channel activity	13	1.61692	0.0556693	WBGENE00022247, WBGENE00014261, WBGENE00000045, WBGENE00006748, WBGENE00003774, WBGENE00001651, WBGENE00000057, WBGENE00001612, WBGENE00006832, WBGENE00002974, WBGENE00012857, WBGENE00001374, WBGENE00022283	454	159	10043	1.80865	1	1	100
KEGG_PATHWAY	cel03030:DNA replication	5	0.621891	0.0566548	WBGENE00008645, WBGENE00003156, WBGENE00003158, WBGENE00020823, WBGENE00002985	133	35	3147	3.38024	0.998162	1	100
GOTERM_CC_DIRECT	GO:0015629~actin cytoskeleton	6	0.746269	0.0576561	WBGENE00000778, WBGENE00016792, WBGENE00019771, WBGENE00000067, WBGENE00013653, WBGENE00003932	563	48	12839	2.85058	1	1	100
GOTERM_BP_DIRECT	GO:0034220~monoatomic ion transmembrane transport	20	2.48756	0.0582292	WBGENE00022247, WBGENE00015288, WBGENE00000045, WBGENE00006748, WBGENE00003774, WBGENE00001651, WBGENE00000057, WBGENE00001612, WBGENE00006832, WBGENE00006678, WBGENE00006668, WBGENE00002974, WBGENE00007988, WBGENE00012857, WBGENE00002140, WBGENE00006675, WBGENE00011868, WBGENE00009513, WBGENE00004035, WBGENE00022283	464	279	10016	1.5474	1	1	100
GOTERM_BP_DIRECT	GO:0050830~defense response to Gram-positive bacterium	8	0.995025	0.0610118	WBGENE00001196, WBGENE00014047, WBGENE00002239, WBGENE00003999, WBGENE00006349, WBGENE00003091, WBGENE00007009, WBGENE00001501	464	76	10016	2.27223	1	1	100
PFAM	PF13855:LRR_8	5	0.621891	0.061447	WBGENE00020649, WBGENE00007261, WBGENE00011345, WBGENE00022789, WBGENE00022129	554	37	13642	3.32764	1	1	100
KEGG_PATHWAY	cel01100:Metabolic pathways	50	6.21891	0.0615622	WBGENE00014054, WBGENE00011064, WBGENE00021508, WBGENE00017283, WBGENE00017282, WBGENE00001338, WBGENE00002028, WBGENE00013597, WBGENE00020181, WBGENE00012663, WBGENE00013433, WBGENE00010326, WBGENE00010722, WBGENE00002979, WBGENE00001527, WBGENE00002497, WBGENE00020507, WBGENE00007509, WBGENE00000511, WBGENE00000830, WBGENE00021515, WBGENE00000513, WBGENE00008565, WBGENE00009294, WBGENE00016335,…	133	964	3147	1.22726	0.998953	1	100
PFAM	PF00335:Tetraspanin	4	0.497512	0.064294	WBGENE00006643, WBGENE00006637, WBGENE00006634, WBGENE00006646	554	23	13642	4.28253	1	1	100
GOTERM_CC_DIRECT	GO:0031090~organelle membrane	3	0.373134	0.0681868	WBGENE00000481, WBGENE00004035, WBGENE00021546	563	10	12839	6.84139	1	1	100
GOTERM_MF_DIRECT	GO:0004386~helicase activity	10	1.24378	0.0688707	WBGENE00019245, WBGENE00022378, WBGENE00003156, WBGENE00008099, WBGENE00021365, WBGENE00007761, WBGENE00003158, WBGENE00018514, WBGENE00014965, WBGENE00014208	454	113	10043	1.95762	1	1	100
PFAM	PF00104:Hormone_recep	16	1.99005	0.069828	WBGENE00003707, WBGENE00003726, WBGENE00019116, WBGENE00018412, WBGENE00019115, WBGENE00016364, WBGENE00003674, WBGENE00022805, WBGENE00007546, WBGENE00003669, WBGENE00003646, WBGENE00003678, WBGENE00003623, WBGENE00012703, WBGENE00003640, WBGENE00013976	554	243	13642	1.62137	1	1	100
PFAM	PF00755:Carn_acyltransf	3	0.373134	0.0708091	WBGENE00000481, WBGENE00019644, WBGENE00021002	554	11	13642	6.71579	1	1	100
GOTERM_BP_DIRECT	GO:0042391~regulation of membrane potential	7	0.870647	0.0743962	WBGENE00012857, WBGENE00022247, WBGENE00000045, WBGENE00003774, WBGENE00000057, WBGENE00022283, WBGENE00002974	464	64	10016	2.36099	1	1	100
GOTERM_BP_DIRECT	GO:0006360~transcription by RNA polymerase I	3	0.373134	0.0750421	WBGENE00019821, WBGENE00009078, WBGENE00013002	464	10	10016	6.47586	1	1	100
GOTERM_BP_DIRECT	GO:0007530~sex determination	3	0.373134	0.0750421	WBGENE00000406, WBGENE00001411, WBGENE00006605	464	10	10016	6.47586	1	1	100
PFAM	PF10146:zf-C4H2	2	0.248756	0.0794328	WBGENE00014152, WBGENE00014153	554	2	13642	24.6245	1	1	100
GOTERM_MF_DIRECT	GO:0005506~iron ion binding	10	1.24378	0.0817142	WBGENE00010589, WBGENE00011009, WBGENE00019473, WBGENE00014030, WBGENE00015041, WBGENE00018413, WBGENE00016147, WBGENE00002497, WBGENE00007964, WBGENE00009903	454	117	10043	1.8907	1	1	100
PFAM	PF00535:Glycos_transf_2	3	0.373134	0.0827543	WBGENE00019276, WBGENE00001630, WBGENE00001631	554	12	13642	6.15614	1	1	100
PFAM	PF13920:zf-C3HC4_3	3	0.373134	0.0827543	WBGENE00004829, WBGENE00008343, WBGENE00019649	554	12	13642	6.15614	1	1	100
GOTERM_CC_DIRECT	GO:0005892~acetylcholine-gated channel complex	5	0.621891	0.0830957	WBGENE00012857, WBGENE00000045, WBGENE00000057, WBGENE00022283, WBGENE00002974	563	38	12839	3.00061	1	1	100
PFAM	PF00067:p450	7	0.870647	0.0874675	WBGENE00010589, WBGENE00011009, WBGENE00019473, WBGENE00015041, WBGENE00018413, WBGENE00016147, WBGENE00007964	554	76	13642	2.26805	1	1	100
GOTERM_MF_DIRECT	GO:0033842~N-acetyl-beta-glucosaminyl-derivative 4-beta-N-acetylgalactosaminyltransferase activity	2	0.248756	0.0881818	WBGENE00000269, WBGENE00012206	454	2	10043	22.1211	1	1	100
GOTERM_CC_DIRECT	GO:0005576~extracellular region	28	3.48259	0.0887076	WBGENE00013481, WBGENE00016893, WBGENE00015683, WBGENE00007419, WBGENE00005018, WBGENE00020579, WBGENE00020556, WBGENE00020317, WBGENE00021888, WBGENE00006893, WBGENE00001462, WBGENE00016627, WBGENE00016283, WBGENE00002497, WBGENE00001387, WBGENE00016084, WBGENE00000776, WBGENE00001072, WBGENE00002084, WBGENE00007399, WBGENE00001391, WBGENE00007950, WBGENE00001390, WBGENE00010575, WBGENE00002088,…	563	469	12839	1.36147	1	1	100
GOTERM_BP_DIRECT	GO:0008064~regulation of actin polymerization or depolymerization	2	0.248756	0.0903196	WBGENE00016983, WBGENE00303007	464	2	10016	21.5862	1	1	100
GOTERM_BP_DIRECT	GO:0045475~locomotor rhythm	2	0.248756	0.0903196	WBGENE00020317, WBGENE00018590	464	2	10016	21.5862	1	1	100
GOTERM_MF_DIRECT	GO:0016705~oxidoreductase activity, acting on paired donors, with incorporation or reduction of molecular oxygen	8	0.995025	0.0927533	WBGENE00010589, WBGENE00011009, WBGENE00019473, WBGENE00015041, WBGENE00018413, WBGENE00016147, WBGENE00002497, WBGENE00007964	454	86	10043	2.05778	1	1	100
KEGG_PATHWAY	cel03410:Base excision repair	4	0.497512	0.0929394	WBGENE00008645, WBGENE00004052, WBGENE00020823, WBGENE00002985	133	26	3147	3.64025	0.999973	1	100
GOTERM_MF_DIRECT	GO:0022857~transmembrane transporter activity	16	1.99005	0.0940835	WBGENE00013083, WBGENE00015381, WBGENE00021158, WBGENE00019550, WBGENE00017861, WBGENE00013353, WBGENE00016343, WBGENE00010282, WBGENE00009929, WBGENE00000002, WBGENE00006865, WBGENE00013439, WBGENE00009513, WBGENE00009350, WBGENE00011643, WBGENE00011456	454	229	10043	1.54558	1	1	100
GOTERM_BP_DIRECT	GO:0036498~IRE1-mediated unfolded protein response	10	1.24378	0.0955544	WBGENE00001749, WBGENE00021883, WBGENE00006752, WBGENE00020472, WBGENE00010670, WBGENE00019444, WBGENE00001630, WBGENE00021868, WBGENE00013765, WBGENE00000843	464	118	10016	1.82934	1	1	100
GOTERM_MF_DIRECT	GO:0005515~protein binding	63	7.83582	0.0963818	WBGENE00016792, WBGENE00044068, WBGENE00013481, WBGENE00000406, WBGENE00020650, WBGENE00007837, WBGENE00001411, WBGENE00003158, WBGENE00006508, WBGENE00006941, WBGENE00001612, WBGENE00008569, WBGENE00000843, WBGENE00009935, WBGENE00003086, WBGENE00000092, WBGENE00004375, WBGENE00003044, WBGENE00007486, WBGENE00013552, WBGENE00018405, WBGENE00011333, WBGENE00000438, WBGENE00017472, WBGENE00001527,…	454	1169	10043	1.19216	1	1	100
GOTERM_CC_DIRECT	GO:0043025~neuronal cell body	12	1.49254	0.0989441	WBGENE00002084, WBGENE00010477, WBGENE00044484, WBGENE00000481, WBGENE00004035, WBGENE00001196, WBGENE00010362, WBGENE00006748, WBGENE00006528, WBGENE00001612, WBGENE00006942, WBGENE00002974	563	162	12839	1.68923	1	1	100
