# Supplementary material
Source: Research Square preprint supplement (doi:10.21203/rs.3.rs-9541370/v1)
Supplement: Supplementary file 9 [file 92cd6fce046057847eaf9d0a.xlsx]

## Sheet: Sheet 1
transcript_id	ensembl_gene_id	gene_name	RNASeq_glp1_luci_1	RNASeq_glp1_luci_2	RNASeq_glp1_luci_3	RNASeq_glp1_ncl1_luci_1	RNASeq_glp1_ncl1_luci_2	RNASeq_glp1_ncl1_luci_3	RNASeq_glp1_ncl1_mrps16_1	RNASeq_glp1_ncl1_mrps16_2	RNASeq_glp1_ncl1_mrps16_3	RNASeq_glp1_ncl1_popl1_1	RNASeq_glp1_ncl1_popl1_2	RNASeq_glp1_ncl1_popl1_3	RiboSeqglp1_luci_1	RiboSeqglp1_luci_2	RiboSeqglp1_luci_3	RiboSeqglp1_ncl1_luci_1	RiboSeqglp1_ncl1_luci_2	RiboSeqglp1_ncl1_luci_3	RiboSeqglp1_ncl1_mrps16_1	RiboSeqglp1_ncl1_mrps16_2	RiboSeqglp1_ncl1_mrps16_3	RiboSeqglp1_ncl1_popl1_1	RiboSeqglp1_ncl1_popl1_2	RiboSeqglp1_ncl1_popl1_3	RNASeq_glp1_luci_1.fpkm	RNASeq_glp1_luci_2.fpkm	RNASeq_glp1_luci_3.fpkm	RNASeq_glp1_ncl1_luci_1.fpkm	RNASeq_glp1_ncl1_luci_2.fpkm	RNASeq_glp1_ncl1_luci_3.fpkm	RNASeq_glp1_ncl1_mrps16_1.fpkm	RNASeq_glp1_ncl1_mrps16_2.fpkm	RNASeq_glp1_ncl1_mrps16_3.fpkm	RNASeq_glp1_ncl1_popl1_1.fpkm	RNASeq_glp1_ncl1_popl1_2.fpkm	RNASeq_glp1_ncl1_popl1_3.fpkm	RiboSeqglp1_luci_1.fpkm	RiboSeqglp1_luci_2.fpkm	RiboSeqglp1_luci_3.fpkm	RiboSeqglp1_ncl1_luci_1.fpkm	RiboSeqglp1_ncl1_luci_2.fpkm	RiboSeqglp1_ncl1_luci_3.fpkm	RiboSeqglp1_ncl1_mrps16_1.fpkm	RiboSeqglp1_ncl1_mrps16_2.fpkm	RiboSeqglp1_ncl1_mrps16_3.fpkm	RiboSeqglp1_ncl1_popl1_1.fpkm	RiboSeqglp1_ncl1_popl1_2.fpkm
2L52.1a.1	WBGene00007063	2L52.1	284	244	211	201	192	138	221	169	145	202	204	184	15	17	0	0	0	6	17	18	0	0	8	16	4.98746	4.13143	3.82193	3.23713	3.37589	2.25987	3.35766	2.99615	3.12949	3.309	3.27017	2.88444	2.09895	1.5394	0	0	0	1.63913	2.74539	5.24571	0	0	3.27216
2L52.1b.1	WBGene00007063	2L52.1	137	133	116	110	115	81	125	105	94	108	113	108	0	3	0	0	0	6	0	0	0	0	7	8	2.40592	2.25197	2.10116	1.77156	2.02202	1.32644	1.89913	1.86151	2.02877	1.76917	1.81142	1.69304	0	0.271658	0	0	0	1.63913	0	0	0	0	2.86314
4R79.2a.1	WBGene00007067	4R79.2	64	69	71	47	55	62	47	42	24	59	60	66	19	16	0	0	0	32	12	10	0	6	2	4	1.12394	1.16831	1.28605	0.75694	0.967051	1.0153	0.714073	0.744604	0.517984	0.96649	0.961815	1.03464	2.65867	1.44885	0	0	0	8.74202	1.93792	2.91428	0	1.39664	0.81804
4R79.2b.1	WBGene00007067	4R79.2	57	60	62	38	49	57	41	34	19	53	56	58	14	11	0	0	0	22	12	10	0	5	0	4	1.00101	1.01593	1.12303	0.611994	0.861555	0.933423	0.622915	0.602775	0.410071	0.868203	0.897694	0.909227	1.95902	0.996081	0	0	0	6.01014	1.93792	2.91428	0	1.16386	0
6R55.2.1	WBGene00007069	6R55.2	5	8	3	1	0	2	1	2	1	2	1	2	0	0	0	0	0	0	0	0	0	0	0	0	0.0878075	0.135457	0.0543403	0.0161051	0	0.0327517	0.015193	0.0354573	0.0215827	0.0327624	0.0160303	0.0313527	0	0	0	0	0	0	0	0	0	0	0
D2096.3.1	WBGene00017071	aagr-1	16047	16107	17403	12097	10400	13305	8756	10341	6606	10287	9732	11292	2329	3828	1473	672	579	768	973	591	552	875	344	643	281.809	272.725	315.228	194.824	182.861	217.88	133.03	183.332	142.575	168.513	156.006	177.017	325.897	346.636	319.706	184.017	193.88	209.809	157.133	172.234	125.249	203.676	140.703
D2096.3.2	WBGene00017071	aagr-1	16047	16107	17403	12097	10400	13305	8756	10341	6606	10287	9732	11292	2329	3828	1473	672	579	768	973	591	552	875	344	643	281.809	272.725	315.228	194.824	182.861	217.88	133.03	183.332	142.575	168.513	156.006	177.017	325.897	346.636	319.706	184.017	193.88	209.809	157.133	172.234	125.249	203.676	140.703
D2096.3.3	WBGene00017071	aagr-1	16047	16107	17403	12097	10400	13305	8756	10341	6606	10287	9732	11292	2329	3828	1473	672	579	768	973	591	552	875	344	643	281.809	272.725	315.228	194.824	182.861	217.88	133.03	183.332	142.575	168.513	156.006	177.017	325.897	346.636	319.706	184.017	193.88	209.809	157.133	172.234	125.249	203.676	140.703
R05F9.12.1	WBGene00019895	aagr-2	37383	38578	40859	31386	28317	35671	25866	26004	19449	25545	26557	28289	3687	4787	1540	1378	1136	1043	1988	691	1239	1314	781	880	656.501	653.206	740.096	505.475	497.891	584.142	392.983	461.016	419.762	418.458	425.715	443.468	515.922	433.476	334.248	377.345	380.394	284.935	321.049	201.377	281.13	305.863	319.445
F40F9.6a.1	WBGene00009583	aagr-3	8519	9637	8647	11608	10238	11989	11598	10845	8147	10446	11105	12006	1186	1980	583	647	595	650	1173	566	659	697	363	530	149.606	163.175	156.627	186.948	180.012	196.33	176.209	192.267	175.834	171.118	178.016	188.21	165.957	179.295	126.537	177.171	199.238	177.572	189.432	164.948	149.528	162.243	148.474
F40F9.6a.2	WBGene00009583	aagr-3	8519	9637	8647	11608	10238	11989	11598	10845	8147	10446	11105	12006	1186	1980	583	647	595	650	1173	566	659	697	363	530	149.606	163.175	156.627	186.948	180.012	196.33	176.209	192.267	175.834	171.118	178.016	188.21	165.957	179.295	126.537	177.171	199.238	177.572	189.432	164.948	149.528	162.243	148.474
F40F9.6b.1	WBGene00009583	aagr-3	8519	9637	8647	11608	10238	11989	11598	10845	8147	10446	11105	12006	1180	1958	586	647	595	650	1151	566	654	700	357	530	149.606	163.175	156.627	186.948	180.012	196.33	176.209	192.267	175.834	171.118	178.016	188.21	165.117	177.302	127.188	177.171	199.238	177.572	185.879	164.948	148.393	162.941	146.02
F40F9.6b.2	WBGene00009583	aagr-3	8519	9637	8647	11608	10238	11989	11598	10845	8147	10446	11105	12006	1180	1958	586	647	595	650	1151	566	654	700	357	530	149.606	163.175	156.627	186.948	180.012	196.33	176.209	192.267	175.834	171.118	178.016	188.21	165.117	177.302	127.188	177.171	199.238	177.572	185.879	164.948	148.393	162.941	146.02
F40F9.6c.1	WBGene00009583	aagr-3	6552	7397	6726	8854	7877	9268	8854	8232	6296	8005	8570	9262	1022	1675	505	543	537	494	984	519	530	580	307	471	115.063	125.247	121.831	142.595	138.499	151.771	134.519	145.942	135.885	131.131	137.379	145.194	143.008	151.676	109.607	148.692	179.816	134.955	158.91	151.251	120.257	135.008	125.569
F40F9.6c.2	WBGene00009583	aagr-3	6552	7397	6726	8854	7877	9268	8854	8232	6296	8005	8570	9262	1022	1675	505	543	537	494	984	519	530	580	307	471	115.063	125.247	121.831	142.595	138.499	151.771	134.519	145.942	135.885	131.131	137.379	145.194	143.008	151.676	109.607	148.692	179.816	134.955	158.91	151.251	120.257	135.008	125.569
F52D1.1.1	WBGene00018682	aagr-4	683	841	650	1476	1356	1420	1680	1509	1405	1393	1417	1386	187	364	139	116	192	152	431	190	278	180	152	137	11.9945	14.2399	11.7737	23.7711	23.8422	23.2537	25.5243	26.7526	30.3237	22.819	22.7149	21.7274	26.1669	32.9612	30.1691	31.7649	64.2919	41.5246	69.6037	55.3714	63.0784	41.8991	62.171
PAR2.3a.1	WBGene00019801	aak-1	542	597	597	646	557	626	665	668	509	517	494	502	85	138	80	55	108	21	86	52	94	62	20	70	9.51833	10.1085	10.8137	10.4039	9.79359	10.2513	10.1034	11.8428	10.9856	8.46908	7.91894	7.86952	11.894	12.4963	17.3635	15.0609	36.1642	5.73695	13.8884	15.1543	21.3287	14.4319	8.1804
PAR2.3a.2	WBGene00019801	aak-1	542	597	597	646	557	626	665	668	509	517	494	502	85	138	80	55	108	21	86	52	94	62	20	70	9.51833	10.1085	10.8137	10.4039	9.79359	10.2513	10.1034	11.8428	10.9856	8.46908	7.91894	7.86952	11.894	12.4963	17.3635	15.0609	36.1642	5.73695	13.8884	15.1543	21.3287	14.4319	8.1804
PAR2.3b.1	WBGene00019801	aak-1	406	455	450	492	407	466	532	488	383	390	363	366	36	71	36	25	36	5	32	0	58	11	17	47	7.12997	7.7041	8.15104	7.92372	7.15618	7.63114	8.0827	8.65159	8.26617	6.38866	5.81898	5.73754	5.03748	6.42925	7.81358	6.84588	12.0547	1.36594	5.16779	0	13.1602	2.5605	6.95334
T01C8.1a.1	WBGene00020142	aak-2	1262	1545	1463	1389	1136	1424	1424	1434	1036	1377	1438	1577	326	441	222	103	133	53	235	206	235	182	91	136	22.1626	26.1601	26.4999	22.37	19.974	23.3192	21.6349	25.4229	22.3597	22.5569	23.0515	24.7216	45.6171	39.9338	48.1838	28.205	44.5355	14.479	37.951	60.0342	53.3217	42.3646	37.2208
T01C8.1b.1	WBGene00020142	aak-2	1262	1545	1463	1389	1136	1424	1424	1434	1036	1377	1438	1577	323	441	222	103	133	53	235	190	235	182	91	136	22.1626	26.1601	26.4999	22.37	19.974	23.3192	21.6349	25.4229	22.3597	22.5569	23.0515	24.7216	45.1974	39.9338	48.1838	28.205	44.5355	14.479	37.951	55.3714	53.3217	42.3646	37.2208
T01C8.1c.1	WBGene00020142	aak-2	1258	1540	1456	1385	1128	1418	1420	1428	1028	1377	1431	1569	325	441	222	103	133	53	235	206	235	182	85	134	22.0924	26.0754	26.3731	22.3056	19.8333	23.2209	21.5741	25.3165	22.187	22.5569	22.9393	24.5962	45.4772	39.9338	48.1838	28.205	44.5355	14.479	37.951	60.0342	53.3217	42.3646	34.7667
T01C8.1c.2	WBGene00020142	aak-2	1258	1540	1456	1385	1128	1418	1420	1428	1028	1377	1431	1569	325	441	222	103	133	53	235	206	235	182	85	134	22.0924	26.0754	26.3731	22.3056	19.8333	23.2209	21.5741	25.3165	22.187	22.5569	22.9393	24.5962	45.4772	39.9338	48.1838	28.205	44.5355	14.479	37.951	60.0342	53.3217	42.3646	34.7667
F55F3.1.1	WBGene00010115	aakb-1	421	548	618	364	283	441	338	416	265	436	437	487	217	285	239	58	33	84	171	69	99	86	63	46	7.39339	9.27879	11.1941	5.86226	4.97592	7.22174	5.13525	7.37513	5.71941	7.1422	7.00522	7.63437	30.3648	25.8076	51.8735	15.8824	11.0502	22.9478	27.6154	20.1086	22.4632	20.0184	25.7683
F55F3.1.2	WBGene00010115	aakb-1	421	548	618	364	283	441	338	416	265	436	437	487	217	285	239	58	33	84	171	69	99	86	63	46	7.39339	9.27879	11.1941	5.86226	4.97592	7.22174	5.13525	7.37513	5.71941	7.1422	7.00522	7.63437	30.3648	25.8076	51.8735	15.8824	11.0502	22.9478	27.6154	20.1086	22.4632	20.0184	25.7683
Y47D3A.15.1	WBGene00012928	aakb-2	499	559	595	518	457	600	587	569	402	461	528	527	74	102	70	40	23	35	115	18	42	56	25	32	8.76318	9.46504	10.7775	8.34245	8.03532	9.8255	8.91832	10.0876	8.67624	7.55173	8.46397	8.26142	10.3548	9.23639	15.1931	10.9534	7.70163	9.56159	18.5717	5.24571	9.52983	13.0353	10.2255
Y111B2A.8a.1	WBGene00013732	aakg-1	2459	2181	2224	2117	2024	2196	2425	1875	1642	2276	2173	2420	109	179	142	29	44	31	101	62	94	74	50	38	43.1837	36.9289	40.2843	34.0945	35.5875	35.9613	36.8431	33.2413	35.4388	37.2836	34.8337	37.9367	15.2524	16.209	30.8202	7.94122	14.7336	8.46883	16.3108	18.0686	21.3287	17.2252	20.451
Y111B2A.8b.1	WBGene00013732	aakg-1	1662	1392	1441	1389	1316	1410	1580	1187	987	1470	1318	1462	84	122	86	28	40	27	71	38	70	45	34	24	29.1872	23.5695	26.1014	22.37	23.1389	23.0899	24.005	21.0439	21.3021	24.0804	21.1279	22.9188	11.7541	11.0474	18.6658	7.66738	13.3941	7.37608	11.466	11.0743	15.883	10.4748	13.9067
Y111B2A.8c.1	WBGene00013732	aakg-1	2037	1733	1800	1735	1646	1780	1932	1543	1269	1815	1775	1898	115	186	124	60	58	27	153	64	119	66	42	58	35.7728	29.3433	32.6042	27.9424	28.9412	29.149	29.353	27.3553	27.3884	29.7319	28.4537	29.7537	16.0919	16.8428	26.9135	16.4301	19.4215	7.37608	24.7085	18.6514	27.0012	15.363	17.1788
Y111B2A.8d.1	WBGene00013732	aakg-1	2011	1696	1800	1697	1620	1773	1924	1524	1254	1816	1757	1899	108	167	128	50	58	27	123	53	103	67	39	54	35.3162	28.7168	32.6042	27.3304	28.4841	29.0344	29.2314	27.0185	27.0647	29.7482	28.1652	29.7693	15.1124	15.1223	27.7816	13.6918	19.4215	7.37608	19.8637	15.4457	23.3708	15.5958	15.9518
Y111B2A.8e.1	WBGene00013732	aakg-1	1913	1624	1680	1603	1533	1674	1842	1394	1186	1688	1563	1749	84	122	90	28	40	27	77	53	77	47	35	28	33.5951	27.4977	30.4306	25.8165	26.9544	27.4131	27.9856	24.7138	25.5971	27.6515	25.0553	27.4179	11.7541	11.0474	19.534	7.66738	13.3941	7.37608	12.435	15.4457	17.4714	10.9403	14.3157
Y111B2A.8f.1	WBGene00013732	aakg-1	2080	1781	1839	1768	1683	1816	1967	1588	1321	1847	1823	1945	117	186	130	60	58	27	153	64	128	66	42	62	36.5279	30.1561	33.3106	28.4738	29.5918	29.7385	29.8847	28.1531	28.5107	30.2561	29.2231	30.4905	16.3718	16.8428	28.2157	16.4301	19.4215	7.37608	24.7085	18.6514	29.0433	15.363	17.1788
Y111B2A.8g.1	WBGene00013732	aakg-1	1840	1523	1614	1535	1452	1583	1729	1349	1108	1622	1514	1643	91	142	111	28	58	27	86	53	89	53	37	45	32.3131	25.7876	29.2351	24.7213	25.5302	25.9229	26.2688	23.916	23.9136	26.5703	24.2698	25.7562	12.7336	12.8585	24.0919	7.66738	19.4215	7.37608	13.8884	15.4457	20.1942	12.3369	15.1337
T20F7.6.1	WBGene00020633	aakg-2	766	712	674	726	711	697	703	685	563	706	727	682	130	209	111	47	19	62	66	8	92	84	44	46	13.4521	12.0557	12.2084	11.6923	12.5013	11.414	10.6807	12.1441	12.1511	11.5651	11.654	10.6913	18.1909	18.9255	24.0919	12.8702	6.36222	16.9377	10.6586	2.33143	20.8749	19.5529	17.9969
Y41G9A.3.1	WBGene00021527	aakg-3	128	162	129	98	104	99	107	60	95	113	133	100	3	22	0	0	0	2	0	0	7	0	3	0	2.24787	2.743	2.33663	1.5783	1.82861	1.62121	1.62566	1.06372	2.05036	1.85107	2.13202	1.56763	0.41979	1.99216	0	0	0	0.546376	0	0	1.5883	0	1.22706
T01B6.3a.1	WBGene00020135	aakg-4	732	811	821	598	455	538	488	517	328	465	433	480	178	243	138	30	37	69	40	58	53	43	27	51	12.855	13.7319	14.8711	9.63086	8.00015	8.8102	7.41421	9.16572	7.07912	7.61725	6.9411	7.52464	24.9075	22.0043	29.9521	8.21505	12.3896	18.85	6.45974	16.9028	12.0257	10.0092	11.0435
T01B6.3b.1	WBGene00020135	aakg-4	357	366	355	298	215	247	207	214	149	217	211	214	72	99	56	10	21	39	18	14	40	20	20	20	6.26945	6.19715	6.43027	4.79932	3.78029	4.04483	3.14496	3.79394	3.21582	3.55472	3.38238	3.35473	10.075	8.96473	12.1545	2.73835	7.03193	10.6543	2.90688	4.08	9.07603	4.65545	8.1804
R53.7a.1	WBGene00011276	aakg-5	1699	1795	1561	1365	1333	1526	1621	1486	1067	1330	1368	1510	123	115	42	55	63	55	91	52	66	12	9	51	29.837	30.3931	28.2751	21.9835	23.4378	24.9895	24.6279	26.3448	23.0287	21.787	21.9294	23.6713	17.2114	10.4136	9.11585	15.0609	21.0958	15.0254	14.6959	15.1543	14.9754	2.79327	3.68118
R53.7a.2	WBGene00011276	aakg-5	1699	1795	1561	1365	1333	1526	1621	1486	1067	1330	1368	1510	123	115	42	55	63	55	91	52	66	12	9	51	29.837	30.3931	28.2751	21.9835	23.4378	24.9895	24.6279	26.3448	23.0287	21.787	21.9294	23.6713	17.2114	10.4136	9.11585	15.0609	21.0958	15.0254	14.6959	15.1543	14.9754	2.79327	3.68118
R53.7b.1	WBGene00011276	aakg-5	1664	1778	1526	1338	1311	1494	1594	1456	1047	1296	1323	1481	90	116	30	55	45	55	73	39	61	13	12	41	29.2223	30.1053	27.6411	21.5486	23.051	24.4655	24.2177	25.8129	22.5971	21.23	21.208	23.2166	12.5937	10.5041	6.51132	15.0609	15.0684	15.0254	11.789	11.3657	13.8409	3.02604	4.90824
Y110A7A.10.1	WBGene00000001	aap-1	217	161	154	149	138	165	172	168	136	173	183	179	51	76	43	24	8	14	19	0	14	19	10	18	3.81084	2.72607	2.78947	2.39966	2.42642	2.70201	2.6132	2.97842	2.93525	2.83395	2.93354	2.80606	7.13642	6.88202	9.33289	6.57204	2.67883	3.82464	3.06837	0	3.17661	4.42268	4.0902
Y110A7A.10.2	WBGene00000001	aap-1	217	161	154	149	138	165	172	168	136	173	183	179	51	76	43	24	8	14	19	0	14	19	10	18	3.81084	2.72607	2.78947	2.39966	2.42642	2.70201	2.6132	2.97842	2.93525	2.83395	2.93354	2.80606	7.13642	6.88202	9.33289	6.57204	2.67883	3.82464	3.06837	0	3.17661	4.42268	4.0902
W02B12.6a.1	WBGene00000196	aars-1	283	266	242	411	372	323	507	417	363	429	438	448	0	12	6	13	1	0	3	20	12	11	3	8	4.9699	4.50394	4.38345	6.6192	6.54078	5.28939	7.70287	7.39285	7.83452	7.02753	7.02125	7.02299	0	1.08663	1.30226	3.55986	0.334854	0	0.48448	5.82857	2.72281	2.5605	1.22706
F28H1.3.1	WBGene00000197	aars-2	1964	2025	2001	6080	5289	6206	7407	6771	5394	6077	6330	7114	221	482	149	460	312	322	720	323	654	482	328	349	34.4908	34.2875	36.245	97.9191	92.9952	101.628	112.535	120.041	116.417	99.5485	101.471	111.521	30.9245	43.6465	32.3396	125.964	104.474	87.9666	116.275	94.1314	148.393	112.196	134.159
F28H1.3.2	WBGene00000197	aars-2	1964	2025	2001	6080	5289	6206	7407	6771	5394	6077	6330	7114	221	482	149	460	312	322	720	323	654	482	328	349	34.4908	34.2875	36.245	97.9191	92.9952	101.628	112.535	120.041	116.417	99.5485	101.471	111.521	30.9245	43.6465	32.3396	125.964	104.474	87.9666	116.275	94.1314	148.393	112.196	134.159
F28H1.3.3	WBGene00000197	aars-2	1964	2025	2001	6080	5289	6206	7407	6771	5394	6077	6330	7114	221	482	149	460	312	322	720	323	654	482	328	349	34.4908	34.2875	36.245	97.9191	92.9952	101.628	112.535	120.041	116.417	99.5485	101.471	111.521	30.9245	43.6465	32.3396	125.964	104.474	87.9666	116.275	94.1314	148.393	112.196	134.159
F28H1.3.4	WBGene00000197	aars-2	1964	2025	2001	6080	5289	6206	7407	6771	5394	6077	6330	7114	221	482	149	460	312	322	720	323	654	482	328	349	34.4908	34.2875	36.245	97.9191	92.9952	101.628	112.535	120.041	116.417	99.5485	101.471	111.521	30.9245	43.6465	32.3396	125.964	104.474	87.9666	116.275	94.1314	148.393	112.196	134.159
R02D3.1a.1	WBGene00019819	aass-1	2883	3450	2509	4677	4366	4308	4958	4027	3803	3796	3712	3482	948	1601	788	749	557	1009	1284	965	825	745	439	591	50.6298	58.4157	45.4466	75.3236	76.7663	70.5471	75.3271	71.3933	82.079	62.183	59.5043	54.585	132.654	144.975	171.031	205.102	186.514	275.647	207.358	281.228	187.193	173.416	179.56
R02D3.1b.1	WBGene00019819	aass-1	2883	3450	2509	4677	4366	4308	4958	4028	3803	3797	3713	3482	921	1561	771	745	547	992	1275	943	824	743	439	569	50.6298	58.4157	45.4466	75.3236	76.7663	70.5471	75.3271	71.4111	82.079	62.1994	59.5203	54.585	128.875	141.353	167.341	204.007	183.165	271.003	205.904	274.817	186.966	172.95	179.56
F27C8.1.1	WBGene00000002	aat-1	1016	1352	1016	985	739	933	752	781	501	924	921	923	275	552	170	78	57	71	136	53	98	113	78	95	17.8425	22.8922	18.4032	15.8635	12.9937	15.2787	11.4252	13.8461	10.8129	15.1362	14.7639	14.4692	38.4807	49.9852	36.8975	21.3591	19.0867	19.3964	21.9631	15.4457	22.2363	26.3033	31.9036
F27C8.1.2	WBGene00000002	aat-1	1016	1352	1016	985	739	933	752	781	501	924	921	923	275	552	170	78	57	71	136	53	98	113	78	95	17.8425	22.8922	18.4032	15.8635	12.9937	15.2787	11.4252	13.8461	10.8129	15.1362	14.7639	14.4692	38.4807	49.9852	36.8975	21.3591	19.0867	19.3964	21.9631	15.4457	22.2363	26.3033	31.9036
F07C3.7.1	WBGene00000003	aat-2	195	248	191	226	196	169	206	166	136	170	192	153	48	69	16	13	10	17	23	12	26	19	9	18	3.42449	4.19916	3.45966	3.63976	3.44622	2.76752	3.12977	2.94296	2.93525	2.7848	3.07781	2.39848	6.71663	6.24815	3.4727	3.55986	3.34854	4.6442	3.71435	3.49714	5.89942	4.42268	3.68118
F52H2.2a.1	WBGene00000004	aat-3	247	250	192	208	172	199	280	204	221	205	208	231	40	72	14	1	11	21	37	62	63	46	12	20	4.33769	4.23302	3.47778	3.34986	3.02423	3.25879	4.25405	3.61665	4.76977	3.35814	3.33429	3.62123	5.5972	6.5198	3.03862	0.273835	3.68339	5.73695	5.97526	18.0686	14.2947	10.7075	4.90824
F52H2.2b.1	WBGene00000004	aat-3	248	250	192	208	172	199	280	205	221	206	210	232	40	72	14	1	11	21	37	62	63	46	12	20	4.35525	4.23302	3.47778	3.34986	3.02423	3.25879	4.25405	3.63438	4.76977	3.37453	3.36635	3.63691	5.5972	6.5198	3.03862	0.273835	3.68339	5.73695	5.97526	18.0686	14.2947	10.7075	4.90824
T13A10.10a.1	WBGene00000005	aat-4	458	562	376	503	463	457	474	332	277	351	410	317	55	106	24	0	19	28	7	0	10	27	6	16	8.04316	9.51584	6.81065	8.10087	8.14081	7.48376	7.2015	5.88592	5.9784	5.7498	6.5724	4.9694	7.69614	9.5986	5.20906	0	6.36222	7.64927	1.13045	0	2.26901	6.28486	2.45412
C55C2.5a.1	WBGene00000006	aat-5	212	265	253	285	247	334	336	297	276	320	360	385	19	75	19	12	18	15	28	14	12	17	9	21	3.72304	4.487	4.5827	4.58996	4.34294	5.46953	5.10486	5.26541	5.95682	5.24198	5.77089	6.03539	2.65867	6.79146	4.12384	3.28602	6.02737	4.09782	4.52182	4.08	2.72281	3.95713	3.68118
T11F9.4a.1	WBGene00000007	aat-6	209	143	198	159	157	203	231	215	144	200	243	214	18	37	18	0	2	13	16	32	7	8	13	7	3.67035	2.42129	3.58646	2.56071	2.76049	3.32429	3.50959	3.81166	3.10791	3.27624	3.89535	3.35473	2.51874	3.35045	3.90679	0	0.669707	3.55145	2.58389	9.32571	1.5883	1.86218	5.31726
T11F9.4b.1	WBGene00000007	aat-6	209	143	198	159	157	203	231	215	144	200	243	214	18	37	18	0	2	13	16	32	7	8	13	7	3.67035	2.42129	3.58646	2.56071	2.76049	3.32429	3.50959	3.81166	3.10791	3.27624	3.89535	3.35473	2.51874	3.35045	3.90679	0	0.669707	3.55145	2.58389	9.32571	1.5883	1.86218	5.31726
F54D12.3.1	WBGene00000008	aat-7	20	13	14	28	34	20	29	28	21	28	37	37	0	4	0	0	0	0	0	0	0	0	3	0	0.35123	0.220117	0.253588	0.450943	0.597813	0.327517	0.440598	0.496403	0.453236	0.458673	0.593119	0.580024	0	0.362211	0	0	0	0	0	0	0	0	1.22706
F28F9.4.1	WBGene00000009	aat-8	40	44	53	50	50	46	43	59	36	53	66	67	21	21	3	0	0	24	6	0	1	5	9	9	0.70246	0.745012	0.960012	0.805256	0.879137	0.753288	0.653301	1.04599	0.776977	0.868203	1.058	1.05031	2.93853	1.90161	0.651132	0	0	6.55652	0.96896	0	0.226901	1.16386	3.68118
Y53H1C.1a.1	WBGene00000010	aat-9	145	164	131	243	185	241	242	196	153	204	243	197	17	26	17	6	12	21	19	19	18	4	4	36	2.54642	2.77686	2.37286	3.91354	3.25281	3.94658	3.67672	3.47482	3.30215	3.34176	3.89535	3.08824	2.37881	2.35437	3.68975	1.64301	4.01824	5.73695	3.06837	5.53714	4.08421	0.93109	1.63608
Y53H1C.1b.1	WBGene00000010	aat-9	145	164	131	243	184	241	242	196	153	204	243	197	17	26	17	6	12	21	19	19	18	4	4	30	2.54642	2.77686	2.37286	3.91354	3.23523	3.94658	3.67672	3.47482	3.30215	3.34176	3.89535	3.08824	2.37881	2.35437	3.68975	1.64301	4.01824	5.73695	3.06837	5.53714	4.08421	0.93109	1.63608
Y39E4B.1.1	WBGene00012714	abce-1	634	683	586	2337	2095	2387	2633	2708	2060	2271	2522	2641	162	226	66	362	237	448	609	365	351	405	189	361	11.134	11.5646	10.6145	37.6376	36.8359	39.0891	40.0033	48.0092	44.4603	37.2017	40.4283	41.4012	22.6686	20.4649	14.3249	99.1283	79.3603	122.388	98.3495	106.371	79.6422	94.2729	77.3048
F18E2.2.1	WBGene00006512	abcf-1	584	578	524	1600	1409	1563	1625	1595	1243	1586	1730	1705	100	189	59	206	131	154	400	134	192	189	110	134	10.2559	9.78675	9.49144	25.7682	24.7741	25.5954	24.6887	28.2772	26.8273	25.9806	27.7323	26.7281	13.993	17.1145	12.8056	56.41	43.8658	42.071	64.5974	39.0514	43.5649	43.994	44.9922
T27E9.7.1	WBGene00012097	abcf-2	4767	4831	5705	13858	11653	14601	14072	14208	10837	14064	14963	16486	187	270	52	338	164	150	413	157	234	253	125	138	83.7156	81.7989	103.337	223.185	204.892	239.104	213.797	251.889	233.892	230.385	239.861	258.44	26.1669	24.4493	11.2863	92.5563	54.916	40.9782	66.6968	45.7543	53.0948	58.8915	51.1275
T27E9.7.2	WBGene00012097	abcf-2	4767	4831	5705	13858	11653	14601	14072	14208	10837	14064	14963	16486	187	270	52	338	164	150	413	157	234	253	125	138	83.7156	81.7989	103.337	223.185	204.892	239.104	213.797	251.889	233.892	230.385	239.861	258.44	26.1669	24.4493	11.2863	92.5563	54.916	40.9782	66.6968	45.7543	53.0948	58.8915	51.1275
F42A10.1.1	WBGene00018339	abcf-3	930	1031	1062	2232	1999	2323	2680	2628	2053	2461	2460	2750	91	118	66	177	178	164	395	124	227	153	104	167	16.3322	17.457	19.2365	35.9466	35.1479	38.0411	40.7174	46.5909	44.3093	40.3141	39.4344	43.1099	12.7336	10.6852	14.3249	48.4688	59.604	44.8029	63.7899	36.1371	51.5065	35.6142	42.5381
F42A10.1.2	WBGene00018339	abcf-3	930	1031	1062	2232	1999	2323	2680	2628	2053	2461	2460	2750	91	118	66	177	178	164	395	124	227	153	104	167	16.3322	17.457	19.2365	35.9466	35.1479	38.0411	40.7174	46.5909	44.3093	40.3141	39.4344	43.1099	12.7336	10.6852	14.3249	48.4688	59.604	44.8029	63.7899	36.1371	51.5065	35.6142	42.5381
F42A10.1.3	WBGene00018339	abcf-3	930	1031	1062	2232	1999	2323	2680	2628	2053	2461	2460	2750	91	118	66	177	178	164	395	124	227	153	104	167	16.3322	17.457	19.2365	35.9466	35.1479	38.0411	40.7174	46.5909	44.3093	40.3141	39.4344	43.1099	12.7336	10.6852	14.3249	48.4688	59.604	44.8029	63.7899	36.1371	51.5065	35.6142	42.5381
C56E6.5.1	WBGene00016973	abch-1	11	7	9	9	7	8	11	18	5	8	19	12	0	2	0	0	0	0	12	0	0	0	0	0	0.193176	0.118525	0.163021	0.144946	0.123079	0.131007	0.167124	0.319116	0.107913	0.13105	0.304575	0.188116	0	0.181106	0	0	0	0	1.93792	0	0	0	0
C56E6.1.1	WBGene00006522	abcx-1	18	16	13	13	13	15	17	24	12	19	18	15	3	3	0	0	0	0	0	0	0	0	0	0	0.316107	0.270913	0.235475	0.209366	0.228576	0.245638	0.258282	0.425488	0.258992	0.311243	0.288545	0.235145	0.41979	0.271658	0	0	0	0	0	0	0	0	0
C50F2.9.1	WBGene00000012	abf-1	14	4	11	9	4	11	17	39	9	3	3	7	3	9	0	0	0	0	0	0	0	0	2	0	0.245861	0.0677284	0.199248	0.144946	0.070331	0.180134	0.258282	0.691418	0.194244	0.0491436	0.0480908	0.109734	0.41979	0.814975	0	0	0	0	0	0	0	0	0.81804
C50F2.10.1	WBGene00000013	abf-2	93	107	145	162	114	160	172	176	149	169	176	173	44	120	99	46	57	157	64	42	125	135	20	93	1.63322	1.81173	2.62645	2.60903	2.00443	2.62013	2.6132	3.12025	3.21582	2.76842	2.82132	2.712	6.15692	10.8663	21.4874	12.5964	19.0867	42.8905	10.3356	12.24	28.3626	31.4243	8.1804
F54B8.5.1	WBGene00000014	abf-3	0	1	2	0	0	2	0	0	0	0	0	1	0	0	0	0	0	0	0	0	0	0	0	0	0	0.0169321	0.0362269	0	0	0.0327517	0	0	0	0	0	0.0156763	0	0	0	0	0	0	0	0	0	0	0
Y38H6C.22.1	WBGene00000015	abf-4	0	2	1	0	0	0	0	1	0	2	0	3	0	0	0	0	0	0	0	0	0	0	0	0	0	0.0338642	0.0181134	0	0	0	0	0.0177287	0	0.0327624	0	0.047029	0	0	0	0	0	0	0	0	0	0	0
T22H6.5.1	WBGene00000016	abf-5	105	133	143	115	116	141	193	116	153	124	173	175	37	94	14	9	21	29	21	27	9	47	14	9	1.84396	2.25197	2.59022	1.85209	2.0396	2.30899	2.93226	2.05653	3.30215	2.03127	2.77323	2.74336	5.17741	8.51197	3.03862	2.46452	7.03193	7.92246	3.39136	7.86857	2.04211	10.9403	5.72628
T22H6.7.1	WBGene00000017	abf-6	143	197	198	109	139	185	165	115	152	176	218	223	40	89	59	23	18	59	42	0	13	30	17	17	2.51129	3.33562	3.58646	1.75546	2.444	3.02953	2.50685	2.0388	3.28057	2.88309	3.49459	3.49582	5.5972	8.0592	12.8056	6.29821	6.02737	16.1181	6.78272	0	2.94971	6.98318	6.95334
F32B4.6.1	WBGene00009316	abhd-11.1	0	1	0	0	0	0	0	0	0	0	0	0	0	0	0	0	0	0	0	0	0	0	0	0	0	0.0169321	0	0	0	0	0	0	0	0	0	0	0	0	0	0	0	0	0	0	0	0	0
R05D7.4.1	WBGene00011029	abhd-11.2	278	320	306	291	234	366	338	433	320	261	345	300	69	96	35	32	34	18	58	36	44	40	17	41	4.88209	5.41827	5.54271	4.68659	4.11436	5.99356	5.13525	7.67651	6.90646	4.27549	5.53044	4.7029	9.65516	8.69307	7.59654	8.76272	11.385	4.91739	9.36662	10.4914	9.98363	9.3109	6.95334
Y97E10AL.2.1	WBGene00022393	abhd-12	1089	1210	1217	1147	1091	1184	1105	1165	822	1041	1121	1072	72	133	61	46	53	86	69	58	30	44	21	19	19.1245	20.4878	22.044	18.4726	19.1828	19.389	16.7883	20.6539	17.741	17.0528	17.9699	16.805	10.075	12.0435	13.2397	12.5964	17.7472	23.4942	11.143	16.9028	6.80702	10.242	8.58942
Y97E10AL.2.2	WBGene00022393	abhd-12	1089	1210	1217	1147	1091	1184	1105	1165	822	1041	1121	1072	72	133	61	46	53	86	69	58	30	44	21	19	19.1245	20.4878	22.044	18.4726	19.1828	19.389	16.7883	20.6539	17.741	17.0528	17.9699	16.805	10.075	12.0435	13.2397	12.5964	17.7472	23.4942	11.143	16.9028	6.80702	10.242	8.58942
Y55F3AM.10.1	WBGene00021927	abhd-14	109	124	156	115	86	138	144	155	116	149	121	174	11	32	9	15	0	0	12	23	8	3	4	0	1.9142	2.09958	2.82569	1.85209	1.51212	2.25987	2.1878	2.74794	2.50359	2.4408	1.93966	2.72768	1.53923	2.89769	1.9534	4.10753	0	0	1.93792	6.70285	1.81521	0.698318	1.63608
Y60A3A.7.1	WBGene00013358	abhd-3.1	1040	1056	1027	1092	882	1131	1123	1134	890	1034	1077	1191	124	165	55	79	43	27	71	40	103	69	64	60	18.264	17.8803	18.6025	17.5868	15.508	18.5211	17.0618	20.1043	19.2086	16.9382	17.2646	18.6705	17.3513	14.9412	11.9374	21.633	14.3987	7.37608	11.466	11.6571	23.3708	16.0613	26.1773
Y60A3A.7.2	WBGene00013358	abhd-3.1	1040	1056	1027	1092	882	1131	1123	1134	890	1034	1077	1191	124	165	55	79	43	27	71	40	103	69	64	60	18.264	17.8803	18.6025	17.5868	15.508	18.5211	17.0618	20.1043	19.2086	16.9382	17.2646	18.6705	17.3513	14.9412	11.9374	21.633	14.3987	7.37608	11.466	11.6571	23.3708	16.0613	26.1773
C44C1.5a.1	WBGene00016644	abhd-3.2	2130	2406	1553	2094	1965	2217	2132	1765	1618	2105	2216	2068	163	193	61	45	93	22	94	16	72	63	41	36	37.406	40.7386	28.1302	33.7241	34.5501	36.3052	32.3916	31.2911	34.9208	34.4824	35.523	32.4186	22.8086	17.4767	13.2397	12.3226	31.1414	6.01014	15.1804	4.66285	16.3369	14.6647	16.7698
C44C1.5a.2	WBGene00016644	abhd-3.2	2130	2406	1553	2094	1965	2217	2132	1765	1618	2105	2216	2068	163	193	61	45	93	22	94	16	72	63	41	36	37.406	40.7386	28.1302	33.7241	34.5501	36.3052	32.3916	31.2911	34.9208	34.4824	35.523	32.4186	22.8086	17.4767	13.2397	12.3226	31.1414	6.01014	15.1804	4.66285	16.3369	14.6647	16.7698
C44C1.5b.1	WBGene00016644	abhd-3.2	1521	1701	1085	1519	1430	1608	1599	1245	1125	1494	1609	1469	112	145	51	35	60	22	75	14	51	40	30	28	26.711	28.8015	19.6531	24.4637	25.1433	26.3323	24.2937	22.0722	24.2805	24.4735	25.7927	23.0285	15.6721	13.1302	11.0692	9.58423	20.0912	6.01014	12.112	4.08	11.5719	9.3109	12.2706
C44C1.5b.2	WBGene00016644	abhd-3.2	1521	1701	1085	1519	1430	1608	1599	1245	1125	1494	1609	1469	112	145	51	35	60	22	75	14	51	40	30	28	26.711	28.8015	19.6531	24.4637	25.1433	26.3323	24.2937	22.0722	24.2805	24.4735	25.7927	23.0285	15.6721	13.1302	11.0692	9.58423	20.0912	6.01014	12.112	4.08	11.5719	9.3109	12.2706
C37H5.2.1	WBGene00016506	abhd-5.1	180	179	235	175	163	187	184	262	112	145	150	182	37	48	23	0	23	17	34	36	16	12	15	26	3.16107	3.03084	4.25666	2.81839	2.86599	3.06228	2.79552	4.64491	2.41726	2.37527	2.40454	2.85309	5.17741	4.34654	4.99201	0	7.70163	4.6442	5.49078	10.4914	3.63041	2.79327	6.1353
C37H5.3a.1	WBGene00016507	abhd-5.2	252	246	284	263	234	385	309	388	263	222	237	322	57	66	38	50	6	31	20	26	43	24	12	18	4.4255	4.16529	5.14421	4.23564	4.11436	6.3047	4.69465	6.87872	5.67625	3.63662	3.79917	5.04778	7.976	5.97649	8.24767	13.6918	2.00912	8.46883	3.22987	7.57714	9.75673	5.58654	4.90824
C37H5.3b.1	WBGene00016507	abhd-5.2	251	246	284	262	234	384	308	386	262	221	237	320	56	59	38	50	6	31	20	26	38	24	12	18	4.40793	4.16529	5.14421	4.21954	4.11436	6.28832	4.67946	6.84327	5.65466	3.62024	3.79917	5.01642	7.83607	5.34262	8.24767	13.6918	2.00912	8.46883	3.22987	7.57714	8.62223	5.58654	4.90824
B0336.6.1	WBGene00015146	abi-1	366	356	328	330	274	348	389	349	268	367	340	411	24	24	7	8	9	16	0	0	15	14	18	13	6.42751	6.02783	5.9412	5.31469	4.81767	5.69879	5.91009	6.18731	5.78416	6.0119	5.45029	6.44297	3.35832	2.17327	1.51931	2.19068	3.01368	4.37101	0	0	3.40351	3.25882	7.36236
B0336.6.2	WBGene00015146	abi-1	366	356	328	330	274	348	389	349	268	367	340	411	24	24	7	8	9	16	0	0	15	14	18	13	6.42751	6.02783	5.9412	5.31469	4.81767	5.69879	5.91009	6.18731	5.78416	6.0119	5.45029	6.44297	3.35832	2.17327	1.51931	2.19068	3.01368	4.37101	0	0	3.40351	3.25882	7.36236
M79.1a.1	WBGene00000018	abl-1	1105	1073	1082	1055	975	980	1172	981	867	1082	1138	1202	28	22	36	0	3	35	26	7	17	21	5	16	19.4054	18.1681	19.5987	16.9909	17.1432	16.0483	17.8063	17.3918	18.7122	17.7244	18.2424	18.8429	3.91804	1.99216	7.81358	0	1.00456	9.56159	4.19883	2.04	3.85731	4.88822	2.0451
M79.1b.1	WBGene00000018	abl-1	1104	1073	1082	1055	975	980	1171	980	866	1078	1138	1202	28	22	36	0	3	35	26	7	17	21	5	16	19.3879	18.1681	19.5987	16.9909	17.1432	16.0483	17.7911	17.3741	18.6906	17.6589	18.2424	18.8429	3.91804	1.99216	7.81358	0	1.00456	9.56159	4.19883	2.04	3.85731	4.88822	2.0451
M79.1c.1	WBGene00000018	abl-1	1058	1030	1028	1019	930	940	1131	949	820	1016	1083	1151	28	21	36	0	3	35	26	7	17	21	5	16	18.5801	17.4401	18.6206	16.4111	16.352	15.3933	17.1833	16.8245	17.6978	16.6433	17.3608	18.0435	3.91804	1.90161	7.81358	0	1.00456	9.56159	4.19883	2.04	3.85731	4.88822	2.0451
C24F3.5a.1	WBGene00000019	abt-1	4	7	5	12	12	6	8	10	5	14	14	10	0	0	0	0	0	0	0	0	0	0	0	0	0.070246	0.118525	0.0905671	0.193261	0.210993	0.098255	0.121544	0.177287	0.107913	0.229337	0.224424	0.156763	0	0	0	0	0	0	0	0	0	0	0
C24F3.5b.1	WBGene00000019	abt-1	4	7	5	10	12	6	8	8	4	14	14	10	0	0	0	0	0	0	0	0	0	0	0	0	0.070246	0.118525	0.0905671	0.161051	0.210993	0.098255	0.121544	0.141829	0.0863307	0.229337	0.224424	0.156763	0	0	0	0	0	0	0	0	0	0	0
F12B6.1a.1	WBGene00000020	abt-2	1635	1483	1587	1367	1281	1352	1508	1365	996	1445	1570	1589	42	60	44	32	21	0	25	9	32	41	19	25	28.713	25.1103	28.746	22.0157	22.5235	22.1401	22.9111	24.1996	21.4964	23.6708	25.1675	24.9097	5.87706	5.43317	9.54994	8.76272	7.03193	0	4.03734	2.62286	7.26082	9.54368	7.77138
F12B6.1b.1	WBGene00000020	abt-2	1633	1483	1587	1367	1281	1351	1508	1365	996	1445	1570	1587	42	60	44	32	21	0	25	9	32	41	19	25	28.6779	25.1103	28.746	22.0157	22.5235	22.1238	22.9111	24.1996	21.4964	23.6708	25.1675	24.8783	5.87706	5.43317	9.54994	8.76272	7.03193	0	4.03734	2.62286	7.26082	9.54368	7.77138
Y39D8C.1.1	WBGene00000022	abt-4	3963	3378	5459	4179	3779	4544	3553	3451	2127	3554	4177	3781	192	307	290	46	119	192	115	88	108	104	97	102	69.5962	57.1966	98.8812	67.3033	66.4452	74.4118	53.9809	61.1816	45.9064	58.2188	66.9584	59.2722	26.8665	27.7997	62.9428	12.5964	39.8476	52.4521	18.5717	25.6457	24.5053	24.2084	39.6749
Y53C10A.9.1	WBGene00000023	abt-5	11	2	2	8	7	5	4	4	4	11	5	6	0	0	0	0	0	0	0	0	0	0	0	0	0.193176	0.0338642	0.0362269	0.128841	0.123079	0.0818792	0.0607722	0.0709147	0.0863307	0.180193	0.0801513	0.094058	0	0	0	0	0	0	0	0	0	0	0
F56F4.6.1	WBGene00018982	abt-6	0	0	0	0	0	0	0	0	0	0	0	0	0	0	0	0	0	0	0	0	0	0	0	0	0	0	0	0	0	0	0	0	0	0	0	0	0	0	0	0	0	0	0	0	0	0	0
Y74C10AR.3a.1	WBGene00022281	abtm-1	576	603	481	1210	1119	1120	1582	1470	1204	1130	1257	1236	60	162	65	100	99	171	252	98	196	196	77	119	10.1154	10.2101	8.71256	19.4872	19.6751	18.3409	24.0354	26.0611	25.9856	18.5107	20.15	19.3759	8.39579	14.6696	14.1079	27.3835	33.1505	46.7152	40.6963	28.56	44.4725	45.6234	31.4945
Y74C10AR.3b.1	WBGene00022281	abtm-1	79	94	69	192	193	195	253	226	168	187	198	211	0	1	0	0	3	12	19	0	28	9	14	10	1.38736	1.59162	1.24983	3.09218	3.39347	3.19329	3.84384	4.00668	3.62589	3.06328	3.17399	3.3077	0	0.0905528	0	0	1.00456	3.27826	3.06837	0	6.35322	2.09495	5.72628
Y74C10AR.3b.2	WBGene00022281	abtm-1	79	94	69	192	193	195	253	226	168	187	198	211	0	1	0	0	3	12	19	0	28	9	14	10	1.38736	1.59162	1.24983	3.09218	3.39347	3.19329	3.84384	4.00668	3.62589	3.06328	3.17399	3.3077	0	0.0905528	0	0	1.00456	3.27826	3.06837	0	6.35322	2.09495	5.72628
Y74C10AR.3c.1	WBGene00022281	abtm-1	106	134	111	306	286	270	394	365	305	271	304	308	8	67	13	56	34	24	86	24	27	31	14	19	1.86152	2.2689	2.01059	4.92816	5.02867	4.42148	5.98606	6.47096	6.58272	4.4393	4.8732	4.82831	1.11944	6.06704	2.82157	15.3348	11.385	6.55652	13.8884	6.99428	6.12632	7.21595	5.72628
F52B5.1a.1	WBGene00009920	abts-1	2223	2316	2164	2172	2047	2218	2576	2022	1840	2072	2260	2257	196	316	180	72	104	125	142	109	160	155	72	93	39.0392	39.2147	39.1975	34.9803	35.9919	36.3216	39.1373	35.8474	39.7121	33.9418	36.2284	35.3815	27.4263	28.6147	39.0679	19.7161	34.8248	34.1485	22.9321	31.7657	36.3041	36.0798	29.4494
F52B5.1b.1	WBGene00009920	abts-1	2228	2318	2170	2174	2048	2219	2581	2027	1843	2075	2261	2267	196	316	181	72	104	125	142	109	160	155	72	93	39.127	39.2486	39.3061	35.0125	36.0095	36.338	39.2133	35.936	39.7769	33.991	36.2444	35.5382	27.4263	28.6147	39.285	19.7161	34.8248	34.1485	22.9321	31.7657	36.3041	36.0798	29.4494
F52B5.1c.1	WBGene00009920	abts-1	2228	2321	2175	2176	2048	2222	2583	2033	1847	2075	2267	2269	196	316	181	72	104	125	142	109	160	155	72	93	39.127	39.2994	39.3967	35.0447	36.0095	36.3871	39.2436	36.0424	39.8632	33.991	36.3406	35.5696	27.4263	28.6147	39.285	19.7161	34.8248	34.1485	22.9321	31.7657	36.3041	36.0798	29.4494
F52D10.1.1	WBGene00009929	abts-2	120	143	127	108	116	109	139	109	114	111	155	129	17	31	10	0	0	0	11	13	23	4	0	8	2.10738	2.42129	2.30041	1.73935	2.0396	1.78497	2.11183	1.93242	2.46043	1.81831	2.48469	2.02225	2.37881	2.80714	2.17044	0	0	0	1.77643	3.78857	5.21872	0.93109	0
F57F10.1a.1	WBGene00019018	abts-3	501	579	483	478	421	497	528	407	390	595	608	542	31	63	60	0	13	25	38	16	7	7	3	7	8.79831	9.80368	8.74878	7.69824	7.40234	8.13879	8.02193	7.21557	8.41725	9.74681	9.74639	8.49657	4.33783	5.70483	13.0226	0	4.3531	6.82971	6.13675	4.66285	1.5883	1.62941	1.22706
F57F10.1b.1	WBGene00019018	abts-3	423	509	401	399	362	432	463	332	329	537	499	447	30	58	49	0	9	25	27	16	7	7	3	2	7.42851	8.61844	7.26348	6.42594	6.36496	7.07436	7.03438	5.88592	7.1007	8.7967	7.9991	7.00732	4.1979	5.25206	10.6352	0	3.01368	6.82971	4.36032	4.66285	1.5883	1.62941	1.22706
F57F10.1c.1	WBGene00019018	abts-3	444	522	413	415	370	440	474	338	338	556	512	462	43	59	49	0	9	25	27	16	8	8	3	4	7.7973	8.83855	7.48085	6.68362	6.50562	7.20537	7.2015	5.99229	7.29495	9.10794	8.20749	7.24246	6.01699	5.34262	10.6352	0	3.01368	6.82971	4.36032	4.66285	1.81521	1.86218	1.22706
F57F10.1d.1	WBGene00019018	abts-3	431	517	407	411	365	438	471	334	333	548	505	455	37	59	49	0	9	25	27	16	8	8	3	4	7.569	8.75389	7.37216	6.6192	6.4177	7.17262	7.15592	5.92138	7.18703	8.97689	8.09528	7.13273	5.17741	5.34262	10.6352	0	3.01368	6.82971	4.36032	4.66285	1.81521	1.86218	1.22706
F57F10.1e.1	WBGene00019018	abts-3	441	523	419	421	375	455	475	337	346	571	529	492	30	59	49	0	13	25	27	16	7	7	3	2	7.74462	8.85548	7.58953	6.78025	6.59353	7.451	7.2167	5.97456	7.46761	9.35366	8.48	7.71275	4.1979	5.34262	10.6352	0	4.3531	6.82971	4.36032	4.66285	1.5883	1.62941	1.22706
R03E9.3a.1	WBGene00019844	abts-4	1001	926	1044	755	766	723	533	540	394	714	692	685	135	163	101	71	57	58	83	52	39	33	27	26	17.5791	15.6791	18.9104	12.1594	13.4684	11.8397	8.09789	9.57348	8.50358	11.6962	11.0929	10.7383	18.8905	14.7601	21.9214	19.4423	19.0867	15.8449	13.404	15.1543	8.84913	7.6815	11.0435
R03E9.3b.1	WBGene00019844	abts-4	959	899	1004	732	729	683	509	516	379	687	663	656	124	157	92	71	46	58	71	52	18	31	25	22	16.8415	15.222	18.1859	11.7889	12.8178	11.1847	7.73326	9.14799	8.17984	11.2539	10.6281	10.2837	17.3513	14.2168	19.968	19.4423	15.4033	15.8449	11.466	15.1543	4.08421	7.21595	10.2255
R03E9.3c.1	WBGene00019844	abts-4	998	923	1038	755	763	721	531	538	389	708	691	681	134	160	100	71	46	58	83	52	33	33	26	26	17.5264	15.6283	18.8017	12.1594	13.4156	11.807	8.06751	9.53802	8.39567	11.5979	11.0769	10.6756	18.7506	14.4885	21.7044	19.4423	15.4033	15.8449	13.404	15.1543	7.48772	7.6815	10.6345
R03E9.3d.1	WBGene00019844	abts-4	928	868	959	707	687	660	484	490	367	654	630	632	124	159	92	71	46	58	71	52	18	31	25	22	16.2971	14.6971	17.3708	11.3863	12.0793	10.8081	7.35343	8.68705	7.92085	10.7133	10.0991	9.90744	17.3513	14.3979	19.968	19.4423	15.4033	15.8449	11.466	15.1543	4.08421	7.21595	10.2255
AC3.3.1	WBGene00000024	abu-1	2	4	4	0	0	0	2	1	3	5	4	2	0	2	0	0	0	0	0	0	0	0	0	0	0.035123	0.0677284	0.0724537	0	0	0	0.0303861	0.0177287	0.0647481	0.081906	0.064121	0.0313527	0	0.181106	0	0	0	0	0	0	0	0	0
F35A5.3.1	WBGene00000033	abu-10	5	3	13	5	5	2	5	12	6	15	11	4	1	0	0	0	0	0	0	0	0	0	0	0	0.0878075	0.0507963	0.235475	0.0805256	0.0879137	0.0327517	0.0759652	0.212744	0.129496	0.245718	0.176333	0.0627053	0.13993	0	0	0	0	0	0	0	0	0	0
T01D1.6.1	WBGene00000034	abu-11	1	3	15	7	6	7	4	15	4	6	16	8	3	2	0	0	0	0	0	8	0	7	0	7	0.0175615	0.0507963	0.271701	0.112736	0.105496	0.114631	0.0607722	0.26593	0.0863307	0.0982871	0.256484	0.125411	0.41979	0.181106	0	0	0	0	0	2.33143	0	1.62941	0
F52D1.3a.1	WBGene00004127	abu-12	6	6	20	11	3	6	3	4	10	10	6	17	0	0	3	0	0	0	0	0	0	0	0	0	0.105369	0.101593	0.362269	0.177156	0.0527482	0.098255	0.0455791	0.0709147	0.215827	0.163812	0.0961815	0.266498	0	0	0.651132	0	0	0	0	0	0	0	0
F52D1.3b.1	WBGene00004127	abu-12	6	6	20	11	3	6	3	4	10	10	6	17	0	0	3	0	0	0	0	0	0	0	0	0	0.105369	0.101593	0.362269	0.177156	0.0527482	0.098255	0.0455791	0.0709147	0.215827	0.163812	0.0961815	0.266498	0	0	0.651132	0	0	0	0	0	0	0	0
F52D1.3b.2	WBGene00004127	abu-12	6	6	20	11	3	6	3	4	10	10	6	17	0	0	3	0	0	0	0	0	0	0	0	0	0.105369	0.101593	0.362269	0.177156	0.0527482	0.098255	0.0455791	0.0709147	0.215827	0.163812	0.0961815	0.266498	0	0	0.651132	0	0	0	0	0	0	0	0
F52D1.3c.1	WBGene00004127	abu-12	5	4	20	9	3	6	2	3	10	10	6	15	0	0	3	0	0	0	0	0	0	0	0	0	0.0878075	0.0677284	0.362269	0.144946	0.0527482	0.098255	0.0303861	0.053186	0.215827	0.163812	0.0961815	0.235145	0	0	0.651132	0	0	0	0	0	0	0	0
F52D1.3c.2	WBGene00004127	abu-12	5	4	20	9	3	6	2	3	10	10	6	15	0	0	3	0	0	0	0	0	0	0	0	0	0.0878075	0.0677284	0.362269	0.144946	0.0527482	0.098255	0.0303861	0.053186	0.215827	0.163812	0.0961815	0.235145	0	0	0.651132	0	0	0	0	0	0	0	0
F57B9.9.1	WBGene00004133	abu-13	11	7	11	1	3	3	6	4	12	2	4	9	0	1	0	0	0	0	0	0	0	0	0	2	0.193176	0.118525	0.199248	0.0161051	0.0527482	0.0491275	0.0911583	0.0709147	0.258992	0.0327624	0.064121	0.141087	0	0.0905528	0	0	0	0	0	0	0	0	0
ZK1067.7.1	WBGene00004174	abu-14	5	12	29	5	1	2	1	15	9	10	1	5	0	10	4	0	0	0	0	0	0	3	0	0	0.0878075	0.203185	0.525289	0.0805256	0.0175827	0.0327517	0.015193	0.26593	0.194244	0.163812	0.0160303	0.0783816	0	0.905528	0.868176	0	0	0	0	0	0	0.698318	0
C03A7.4.1	WBGene00004099	abu-15	1	3	3	1	0	1	0	0	0	2	0	1	0	0	0	0	0	0	0	0	0	0	0	0	0.0175615	0.0507963	0.0543403	0.0161051	0	0.0163758	0	0	0	0.0327624	0	0.0156763	0	0	0	0	0	0	0	0	0	0	0
F19G12.7.1	WBGene00000025	abu-2	3	3	3	1	0	1	1	7	1	0	2	4	0	0	0	0	0	0	0	0	0	0	0	0	0.0526845	0.0507963	0.0543403	0.0161051	0	0.0163758	0.015193	0.124101	0.0215827	0	0.0320605	0.0627053	0	0	0	0	0	0	0	0	0	0	0
Y5H2A.3.1	WBGene00000027	abu-4	0	0	1	0	0	0	0	0	1	1	0	1	0	0	0	0	0	0	0	0	0	0	0	0	0	0	0.0181134	0	0	0	0	0	0.0215827	0.0163812	0	0.0156763	0	0	0	0	0	0	0	0	0	0	0
Y105C5A.4.1	WBGene00000028	abu-5	0	0	0	0	0	0	0	0	0	0	0	0	0	0	0	0	0	0	0	0	0	0	0	0	0	0	0	0	0	0	0	0	0	0	0	0	0	0	0	0	0	0	0	0	0	0	0
C03A7.7.1	WBGene00000029	abu-6	0	2	0	1	0	2	0	0	0	3	0	0	0	0	0	0	0	0	0	0	0	0	0	0	0	0.0338642	0	0.0161051	0	0.0327517	0	0	0	0.0491436	0	0	0	0	0	0	0	0	0	0	0	0	0
C03A7.8.1	WBGene00000030	abu-7	0	4	1	3	0	1	1	0	0	1	0	0	0	0	0	0	0	0	0	0	0	0	0	0	0	0.0677284	0.0181134	0.0483153	0	0.0163758	0.015193	0	0	0.0163812	0	0	0	0	0	0	0	0	0	0	0	0	0
C03A7.14.1	WBGene00000031	abu-8	5	9	5	2	2	0	1	4	0	0	1	1	0	0	0	0	0	0	0	0	0	0	0	0	0.0878075	0.152389	0.0905671	0.0322102	0.0351655	0	0.015193	0.0709147	0	0	0.0160303	0.0156763	0	0	0	0	0	0	0	0	0	0	0
C03A7.14.2	WBGene00000031	abu-8	5	9	5	2	2	0	1	4	0	0	1	1	0	0	0	0	0	0	0	0	0	0	0	0	0.0878075	0.152389	0.0905671	0.0322102	0.0351655	0	0.015193	0.0709147	0	0	0.0160303	0.0156763	0	0	0	0	0	0	0	0	0	0	0
R09F10.2.1	WBGene00000032	abu-9	0	0	0	0	0	0	0	0	0	0	0	0	0	0	0	0	0	0	0	0	0	0	0	0	0	0	0	0	0	0	0	0	0	0	0	0	0	0	0	0	0	0	0	0	0	0	0
AC3.12.1	WBGene00077503	AC3.12	0	0	0	0	0	0	0	0	0	0	0	0	0	0	0	0	0	0	0	0	0	0	0	0	0	0	0	0	0	0	0	0	0	0	0	0	0	0	0	0	0	0	0	0	0	0	0
AC3.5a.1	WBGene00007071	AC3.5	3994	4731	4023	6224	5587	5673	6944	5502	5411	6300	6739	5950	1379	1544	1004	877	784	968	1462	1796	1524	997	1098	893	70.1406	80.1057	72.8703	100.238	98.2348	92.9001	105.501	97.5431	116.784	103.202	108.028	93.2741	192.963	139.814	217.912	240.153	262.525	264.446	236.103	523.405	345.797	232.074	449.104
AC3.5a.2	WBGene00007071	AC3.5	3994	4731	4023	6224	5587	5673	6944	5502	5411	6300	6739	5950	1379	1544	1004	877	784	968	1462	1827	1527	997	1100	893	70.1406	80.1057	72.8703	100.238	98.2348	92.9001	105.501	97.5431	116.784	103.202	108.028	93.2741	192.963	139.814	217.912	240.153	262.525	264.446	236.103	532.44	346.477	232.074	449.922
AC3.5b.1	WBGene00007071	AC3.5	3824	4484	3782	5898	5277	5331	6615	5178	5128	6002	6363	5606	1316	1467	924	800	753	910	1377	1746	1381	961	1016	807	67.1551	75.9235	68.505	94.988	92.7842	87.2996	100.502	91.799	110.676	98.3199	102	87.8815	184.148	132.841	200.549	219.068	252.145	248.601	222.376	508.834	313.35	223.694	415.564
AC7.3.1	WBGene00014997	AC7.3	0	0	0	0	0	0	0	0	0	1	0	4	0	0	0	0	0	0	0	0	0	0	0	0	0	0	0	0	0	0	0	0	0	0.0163812	0	0.0627053	0	0	0	0	0	0	0	0	0	0	0
AC8.10.1	WBGene00043988	AC8.10	20	23	21	25	19	19	22	27	12	20	15	22	0	0	0	0	0	0	0	0	0	0	0	0	0.35123	0.389438	0.380382	0.402628	0.334072	0.311141	0.334247	0.478674	0.258992	0.327624	0.240454	0.344879	0	0	0	0	0	0	0	0	0	0	0
AC8.11.1	WBGene00043989	AC8.11	11	19	12	3	9	6	15	6	5	7	3	10	0	0	0	0	0	0	0	0	0	0	0	0	0.193176	0.32171	0.217361	0.0483153	0.158245	0.098255	0.227896	0.106372	0.107913	0.114668	0.0480908	0.156763	0	0	0	0	0	0	0	0	0	0	0
AC8.12.1	WBGene00043990	AC8.12	2	4	4	4	2	4	3	2	2	4	3	3	0	0	0	0	0	0	0	0	0	0	0	0	0.035123	0.0677284	0.0724537	0.0644205	0.0351655	0.0655033	0.0455791	0.0354573	0.0431654	0.0655248	0.0480908	0.047029	0	0	0	0	0	0	0	0	0	0	0
AC8.3.1	WBGene00007075	AC8.3	20	23	21	25	19	19	22	27	12	20	15	22	0	0	0	0	0	0	0	0	0	0	0	0	0.35123	0.389438	0.380382	0.402628	0.334072	0.311141	0.334247	0.478674	0.258992	0.327624	0.240454	0.344879	0	0	0	0	0	0	0	0	0	0	0
AC8.4.1	WBGene00007076	AC8.4	11	16	11	3	9	5	14	5	5	5	2	10	0	0	0	0	0	0	0	0	0	0	0	0	0.193176	0.270913	0.199248	0.0483153	0.158245	0.0818792	0.212703	0.0886433	0.107913	0.081906	0.0320605	0.156763	0	0	0	0	0	0	0	0	0	0	0
AC8.7.1	WBGene00007079	AC8.7	2	4	4	4	2	4	3	2	2	4	3	3	0	0	0	0	0	0	0	0	0	0	0	0	0.035123	0.0677284	0.0724537	0.0644205	0.0351655	0.0655033	0.0455791	0.0354573	0.0431654	0.0655248	0.0480908	0.047029	0	0	0	0	0	0	0	0	0	0	0
F53A2.7.1	WBGene00009952	acaa-2	3314	4420	3592	3656	3438	3939	4737	4450	3929	3863	4209	4058	2355	4428	1808	1065	1015	1372	1821	690	1143	1433	578	1123	58.1988	74.8399	65.0634	58.8803	60.4495	64.5044	71.9695	78.8926	84.7984	63.2805	67.4713	63.6145	329.535	400.968	392.416	291.634	339.876	374.814	294.08	201.086	259.348	333.563	236.414
F53A2.7.2	WBGene00009952	acaa-2	3314	4420	3592	3656	3438	3939	4737	4450	3929	3863	4209	4058	2355	4428	1808	1065	1015	1372	1821	690	1143	1433	578	1123	58.1988	74.8399	65.0634	58.8803	60.4495	64.5044	71.9695	78.8926	84.7984	63.2805	67.4713	63.6145	329.535	400.968	392.416	291.634	339.876	374.814	294.08	201.086	259.348	333.563	236.414
C44E4.6.1	WBGene00016655	acbp-1	2873	3027	3057	3330	2824	3603	3600	3912	2819	2650	2799	2879	1434	1061	525	266	336	399	672	384	629	588	586	312	50.4542	51.2534	55.3727	53.63	49.6537	59.0021	54.695	69.3546	60.8416	43.4102	44.8687	45.1321	200.659	96.0766	113.948	72.8401	112.511	109.002	108.524	111.908	142.721	136.87	239.686
C44E4.6.2	WBGene00016655	acbp-1	2873	3027	3057	3330	2824	3603	3600	3912	2819	2650	2799	2879	1434	1061	525	266	336	399	672	384	629	588	586	312	50.4542	51.2534	55.3727	53.63	49.6537	59.0021	54.695	69.3546	60.8416	43.4102	44.8687	45.1321	200.659	96.0766	113.948	72.8401	112.511	109.002	108.524	111.908	142.721	136.87	239.686
C44E4.6.3	WBGene00016655	acbp-1	2873	3027	3057	3330	2824	3603	3600	3912	2819	2650	2799	2879	1434	1061	525	266	336	399	672	384	629	588	586	312	50.4542	51.2534	55.3727	53.63	49.6537	59.0021	54.695	69.3546	60.8416	43.4102	44.8687	45.1321	200.659	96.0766	113.948	72.8401	112.511	109.002	108.524	111.908	142.721	136.87	239.686
F47B10.7.1	WBGene00009818	acbp-3	84	96	154	110	110	119	132	148	94	127	101	147	23	56	81	8	8	17	1	49	62	26	35	48	1.47517	1.62548	2.78947	1.77156	1.9341	1.94872	2.00548	2.62384	2.02877	2.08041	1.61906	2.30442	3.21839	5.07096	17.5806	2.19068	2.67883	4.6442	0.161493	14.28	14.0678	6.05209	14.3157
F56C9.5.1	WBGene00018949	acbp-4	4	4	9	4	1	0	5	5	1	3	0	4	0	0	0	0	0	0	0	0	0	0	0	0	0.070246	0.0677284	0.163021	0.0644205	0.0175827	0	0.0759652	0.0886433	0.0215827	0.0491436	0	0.0627053	0	0	0	0	0	0	0	0	0	0	0
T12D8.3.1	WBGene00011731	acbp-5	140	109	117	137	124	122	158	162	154	122	167	143	25	51	22	27	17	6	28	0	36	22	22	12	2.45861	1.8456	2.11927	2.2064	2.18026	1.99785	2.4005	2.87204	3.32373	1.99851	2.67705	2.24171	3.49825	4.61819	4.77497	7.39355	5.69251	1.63913	4.52182	0	8.16843	5.121	8.99844
T12D8.3.2	WBGene00011731	acbp-5	140	109	117	137	124	122	158	162	154	122	167	143	25	51	22	27	17	6	28	0	36	22	22	12	2.45861	1.8456	2.11927	2.2064	2.18026	1.99785	2.4005	2.87204	3.32373	1.99851	2.67705	2.24171	3.49825	4.61819	4.77497	7.39355	5.69251	1.63913	4.52182	0	8.16843	5.121	8.99844
Y17G7B.1.1	WBGene00012457	acbp-6	102	93	103	143	111	158	157	203	111	134	108	144	81	141	70	24	37	28	100	36	130	107	39	61	1.79127	1.57468	1.86568	2.30303	1.95169	2.58738	2.38531	3.59892	2.39568	2.19508	1.73127	2.25739	11.3343	12.7679	15.1931	6.57204	12.3896	7.64927	16.1493	10.4914	29.4971	24.9067	15.9518
F26A1.15.1	WBGene00044603	acbp-7	2	1	4	2	4	2	2	7	1	1	0	4	1	7	0	16	0	0	0	0	0	0	0	0	0.035123	0.0169321	0.0724537	0.0322102	0.070331	0.0327517	0.0303861	0.124101	0.0215827	0.0163812	0	0.0627053	0.13993	0.63387	0	4.38136	0	0	0	0	0	0	0
F58G6.4a.1	WBGene00010275	acc-1	18	24	28	23	19	29	29	31	48	33	35	36	2	1	0	0	0	0	0	0	4	3	1	0	0.316107	0.40637	0.507176	0.370418	0.334072	0.474899	0.440598	0.549589	1.03597	0.540579	0.561059	0.564348	0.27986	0.0905528	0	0	0	0	0	0	0.907603	0.698318	0.40902
F58G6.4b.1	WBGene00010275	acc-1	18	24	28	23	19	30	29	31	49	33	35	36	2	1	0	0	0	0	0	0	4	3	1	0	0.316107	0.40637	0.507176	0.370418	0.334072	0.491275	0.440598	0.549589	1.05755	0.540579	0.561059	0.564348	0.27986	0.0905528	0	0	0	0	0	0	0.907603	0.698318	0.40902
C53D6.3.1	WBGene00008280	acc-2	28	25	17	13	11	23	13	26	23	19	24	13	3	7	5	0	1	6	10	8	0	2	0	0	0.491722	0.423302	0.307928	0.209366	0.19341	0.376644	0.19751	0.460945	0.496402	0.311243	0.384726	0.203792	0.41979	0.63387	1.08522	0	0.334854	1.63913	1.61493	2.33143	0	0.465545	0
F55D10.5.1	WBGene00018880	acc-3	21	21	26	12	13	24	20	17	13	16	21	21	2	5	0	0	7	0	0	0	0	0	0	0	0.368791	0.355574	0.470949	0.193261	0.228576	0.39302	0.303861	0.301387	0.280575	0.262099	0.336635	0.329203	0.27986	0.452764	0	0	2.34398	0	0	0	0	0	0
T27E9.9.1	WBGene00012099	acc-4	41	45	43	43	38	30	31	23	49	40	42	44	0	2	0	0	0	0	0	0	4	0	0	0	0.720021	0.761944	0.778877	0.69252	0.668144	0.491275	0.470984	0.407759	1.05755	0.655248	0.673271	0.689758	0	0.181106	0	0	0	0	0	0	0.907603	0	0
T27E9.9.2	WBGene00012099	acc-4	41	45	43	43	38	30	31	23	49	40	42	44	0	2	0	0	0	0	0	0	4	0	0	0	0.720021	0.761944	0.778877	0.69252	0.668144	0.491275	0.470984	0.407759	1.05755	0.655248	0.673271	0.689758	0	0.181106	0	0	0	0	0	0	0.907603	0	0
T27E9.9.3	WBGene00012099	acc-4	41	45	43	43	38	30	31	23	49	40	42	44	0	2	0	0	0	0	0	0	4	0	0	0	0.720021	0.761944	0.778877	0.69252	0.668144	0.491275	0.470984	0.407759	1.05755	0.655248	0.673271	0.689758	0	0.181106	0	0	0	0	0	0	0.907603	0	0
C24G7.2.1	WBGene00016064	acd-1	125	141	114	131	150	100	216	178	180	144	126	93	8	14	4	0	5	0	23	0	2	0	2	0	2.19519	2.38743	2.06493	2.10977	2.63741	1.63758	3.2817	3.1557	3.88488	2.35889	2.01981	1.4579	1.11944	1.26774	0.868176	0	1.67427	0	3.71435	0	0.453801	0	0.81804
C24G7.4.1	WBGene00016066	acd-2	132	172	192	219	202	190	253	199	196	257	279	269	24	32	33	10	14	11	47	19	9	31	11	42	2.31812	2.91232	3.47778	3.52702	3.55172	3.11141	3.84384	3.52801	4.23021	4.20997	4.47244	4.21693	3.35832	2.89769	7.16245	2.73835	4.68795	3.00507	7.59019	5.53714	2.04211	7.21595	4.49922
C27C12.5a.1	WBGene00007775	acd-3	164	172	152	125	99	119	126	121	117	115	122	131	16	17	6	0	3	12	2	4	9	2	3	12	2.88008	2.91232	2.75324	2.01314	1.74069	1.94872	1.91432	2.14517	2.52517	1.88384	1.95569	2.0536	2.23888	1.5394	1.30226	0	1.00456	3.27826	0.322987	1.16571	2.04211	0.465545	1.22706
C27C12.5b.1	WBGene00007775	acd-3	164	172	152	125	99	119	126	121	117	115	122	131	16	17	6	0	3	12	2	4	9	2	3	12	2.88008	2.91232	2.75324	2.01314	1.74069	1.94872	1.91432	2.14517	2.52517	1.88384	1.95569	2.0536	2.23888	1.5394	1.30226	0	1.00456	3.27826	0.322987	1.16571	2.04211	0.465545	1.22706
F28A12.1.1	WBGene00017879	acd-4	3	8	11	12	15	7	14	9	20	6	10	15	0	0	0	0	0	0	0	13	0	0	0	0	0.0526845	0.135457	0.199248	0.193261	0.263741	0.114631	0.212703	0.159558	0.431654	0.0982871	0.160303	0.235145	0	0	0	0	0	0	0	3.78857	0	0	0
T28F2.7.1	WBGene00020903	acd-5	692	718	683	546	481	493	545	517	338	556	523	560	31	53	26	34	18	0	19	1	0	33	14	7	12.1526	12.1572	12.3715	8.79339	8.4573	8.07329	8.28021	9.16572	7.29495	9.10794	8.38382	8.77874	4.33783	4.7993	5.64314	9.31039	6.02737	0	3.06837	0.291428	0	7.6815	5.72628
C55B7.4a.1	WBGene00016943	acdh-1	4713	5038	2697	1529	1357	1704	5005	5651	3944	809	937	1021	408	700	139	62	20	102	373	175	285	32	42	45	82.7673	85.3039	48.8519	24.6247	23.8598	27.9044	76.0412	100.185	85.1221	13.2524	15.0203	16.0055	57.0914	63.387	30.1691	16.9778	6.69707	27.8652	60.237	51	64.6667	7.44872	17.1788
C55B7.4b.1	WBGene00016943	acdh-1	3150	3431	1848	1077	965	1149	3397	3866	2797	558	661	688	189	409	77	20	9	52	202	67	149	8	31	21	55.3187	58.094	33.4736	17.3452	16.9674	18.8158	51.6108	68.539	60.3668	9.1407	10.596	10.7853	26.4467	37.0361	16.7124	5.4767	3.01368	14.2058	32.6217	19.5257	33.8082	1.86218	12.6796
C55B7.4b.2	WBGene00016943	acdh-1	3150	3431	1848	1077	965	1149	3397	3866	2797	558	661	688	189	409	77	20	9	52	202	67	149	8	31	21	55.3187	58.094	33.4736	17.3452	16.9674	18.8158	51.6108	68.539	60.3668	9.1407	10.596	10.7853	26.4467	37.0361	16.7124	5.4767	3.01368	14.2058	32.6217	19.5257	33.8082	1.86218	12.6796
C55B7.4b.3	WBGene00016943	acdh-1	3150	3431	1848	1077	965	1149	3397	3866	2797	558	661	688	189	409	77	20	9	52	202	67	149	8	31	21	55.3187	58.094	33.4736	17.3452	16.9674	18.8158	51.6108	68.539	60.3668	9.1407	10.596	10.7853	26.4467	37.0361	16.7124	5.4767	3.01368	14.2058	32.6217	19.5257	33.8082	1.86218	12.6796
C55B7.4b.4	WBGene00016943	acdh-1	3150	3431	1848	1077	965	1149	3397	3866	2797	558	661	688	187	409	77	20	9	52	202	67	147	8	31	21	55.3187	58.094	33.4736	17.3452	16.9674	18.8158	51.6108	68.539	60.3668	9.1407	10.596	10.7853	26.1669	37.0361	16.7124	5.4767	3.01368	14.2058	32.6217	19.5257	33.3544	1.86218	12.6796
C55B7.4b.5	WBGene00016943	acdh-1	3150	3431	1848	1077	965	1149	3397	3866	2797	558	661	688	189	409	77	20	9	52	202	67	149	8	31	21	55.3187	58.094	33.4736	17.3452	16.9674	18.8158	51.6108	68.539	60.3668	9.1407	10.596	10.7853	26.4467	37.0361	16.7124	5.4767	3.01368	14.2058	32.6217	19.5257	33.8082	1.86218	12.6796
C55B7.4b.6	WBGene00016943	acdh-1	3150	3431	1848	1077	965	1149	3397	3866	2797	558	661	688	187	409	77	20	9	52	202	67	147	8	31	21	55.3187	58.094	33.4736	17.3452	16.9674	18.8158	51.6108	68.539	60.3668	9.1407	10.596	10.7853	26.1669	37.0361	16.7124	5.4767	3.01368	14.2058	32.6217	19.5257	33.3544	1.86218	12.6796
C55B7.4b.7	WBGene00016943	acdh-1	3150	3431	1848	1077	965	1149	3397	3866	2797	558	661	688	187	409	77	20	9	52	202	67	147	8	31	21	55.3187	58.094	33.4736	17.3452	16.9674	18.8158	51.6108	68.539	60.3668	9.1407	10.596	10.7853	26.1669	37.0361	16.7124	5.4767	3.01368	14.2058	32.6217	19.5257	33.3544	1.86218	12.6796
T08G2.3.1	WBGene00020366	acdh-10	3296	3419	3948	4105	3373	4515	3545	3716	2650	3294	3412	3712	408	623	300	248	189	268	360	262	409	201	193	215	57.8827	57.8908	71.5118	66.1115	59.3066	73.9369	53.8593	65.8797	57.1941	53.9596	54.6952	58.1905	57.0914	56.4144	65.1132	67.9111	63.2873	73.2144	58.1376	76.3542	92.8024	46.7873	78.9409
T08G2.3.2	WBGene00020366	acdh-10	3296	3419	3948	4105	3373	4515	3545	3716	2650	3294	3412	3712	408	623	300	248	189	268	360	262	409	201	193	215	57.8827	57.8908	71.5118	66.1115	59.3066	73.9369	53.8593	65.8797	57.1941	53.9596	54.6952	58.1905	57.0914	56.4144	65.1132	67.9111	63.2873	73.2144	58.1376	76.3542	92.8024	46.7873	78.9409
Y45F3A.3a.1	WBGene00012860	acdh-11	1930	2140	2235	2134	1845	2314	2365	2470	1849	2070	2143	2286	407	514	365	264	137	152	382	200	288	298	114	167	33.8937	36.2347	40.4835	34.3683	32.4402	37.8937	35.9316	43.7898	39.9064	33.9091	34.3528	35.8361	56.9515	46.5442	79.2211	72.2925	45.875	41.5246	61.6905	58.2857	65.3474	69.3662	46.6283
Y45F3A.3a.2	WBGene00012860	acdh-11	1930	2140	2235	2134	1845	2314	2365	2470	1849	2070	2143	2286	407	514	365	264	137	152	382	200	288	298	114	167	33.8937	36.2347	40.4835	34.3683	32.4402	37.8937	35.9316	43.7898	39.9064	33.9091	34.3528	35.8361	56.9515	46.5442	79.2211	72.2925	45.875	41.5246	61.6905	58.2857	65.3474	69.3662	46.6283
Y45F3A.3b.1	WBGene00012860	acdh-11	1928	2140	2235	2134	1845	2314	2365	2470	1848	2070	2143	2286	407	508	365	264	137	150	382	200	281	297	114	161	33.8586	36.2347	40.4835	34.3683	32.4402	37.8937	35.9316	43.7898	39.8848	33.9091	34.3528	35.8361	56.9515	46.0008	79.2211	72.2925	45.875	40.9782	61.6905	58.2857	63.7591	69.1335	46.6283
E04F6.5a.1	WBGene00017125	acdh-12	2818	3413	2949	3347	3057	3503	3326	3402	2424	3138	3196	3351	1022	1520	785	585	376	595	731	364	608	550	356	454	49.4883	57.7892	53.4165	53.9038	53.7505	57.3645	50.5321	60.3129	52.3164	51.4042	51.2327	52.5314	143.008	137.64	170.38	160.194	125.905	162.547	118.052	106.08	137.956	128.025	145.611
E04F6.5a.2	WBGene00017125	acdh-12	2818	3413	2949	3347	3057	3503	3326	3402	2424	3138	3196	3351	1022	1520	785	585	376	595	731	364	608	550	356	454	49.4883	57.7892	53.4165	53.9038	53.7505	57.3645	50.5321	60.3129	52.3164	51.4042	51.2327	52.5314	143.008	137.64	170.38	160.194	125.905	162.547	118.052	106.08	137.956	128.025	145.611
C28C12.9.1	WBGene00001566	acdh-13	220	199	150	311	326	304	525	453	435	370	364	402	18	39	37	38	5	12	133	13	47	33	12	40	3.86353	3.36949	2.71701	5.00869	5.73198	4.97825	7.97635	8.03109	9.38847	6.06104	5.83501	6.30188	2.51874	3.53156	8.03063	10.4057	1.67427	3.27826	21.4786	3.78857	10.6643	7.6815	4.90824
C28C12.9.2	WBGene00001566	acdh-13	220	199	150	311	326	304	525	453	435	370	364	402	18	39	37	38	5	19	133	13	47	33	12	40	3.86353	3.36949	2.71701	5.00869	5.73198	4.97825	7.97635	8.03109	9.38847	6.06104	5.83501	6.30188	2.51874	3.53156	8.03063	10.4057	1.67427	5.19058	21.4786	3.78857	10.6643	7.6815	4.90824
C17C3.12a.1	WBGene00015894	acdh-2	39	22	29	27	24	69	53	83	59	41	36	54	2	1	0	0	0	1	16	0	4	5	0	2	0.684898	0.372506	0.525289	0.434838	0.421986	1.12993	0.805231	1.47148	1.27338	0.671629	0.577089	0.846522	0.27986	0.0905528	0	0	0	0.273188	2.58389	0	0.907603	1.16386	0
C17C3.12a.2	WBGene00015894	acdh-2	39	22	29	27	24	69	53	83	59	41	36	54	2	1	0	0	0	1	16	0	4	5	0	2	0.684898	0.372506	0.525289	0.434838	0.421986	1.12993	0.805231	1.47148	1.27338	0.671629	0.577089	0.846522	0.27986	0.0905528	0	0	0	0.273188	2.58389	0	0.907603	1.16386	0
C17C3.12b.1	WBGene00015894	acdh-2	30	18	20	24	18	49	37	61	39	33	26	45	2	1	0	0	0	0	6	0	0	5	0	0	0.526845	0.304778	0.362269	0.386523	0.316489	0.802416	0.562143	1.08145	0.841725	0.540579	0.416787	0.705435	0.27986	0.0905528	0	0	0	0	0.96896	0	0	1.16386	0
C17C3.12c.1	WBGene00015894	acdh-2	49	25	35	29	30	82	70	96	73	48	43	63	5	3	0	0	0	1	6	0	4	5	0	0	0.860513	0.423302	0.63397	0.467048	0.527482	1.34282	1.06351	1.70195	1.57554	0.786297	0.689301	0.987609	0.699649	0.271658	0	0	0	0.273188	0.96896	0	0.907603	1.16386	0
C17C3.12d.1	WBGene00015894	acdh-2	24	14	15	20	13	33	27	50	36	30	26	35	2	1	0	0	0	0	6	0	7	5	0	0	0.421476	0.237049	0.271701	0.322102	0.228576	0.540403	0.410212	0.886433	0.776977	0.491436	0.416787	0.548671	0.27986	0.0905528	0	0	0	0	0.96896	0	1.5883	1.16386	0
C17C3.12e.1	WBGene00015894	acdh-2	35	21	24	26	22	65	50	84	50	36	38	56	2	1	0	0	0	1	6	0	4	5	0	0	0.614652	0.355574	0.434722	0.418733	0.38682	1.06443	0.759652	1.48921	1.07913	0.589723	0.60915	0.877874	0.27986	0.0905528	0	0	0	0.273188	0.96896	0	0.907603	1.16386	0
K06A5.6.1	WBGene00019433	acdh-3	1363	1559	1522	1889	1828	2061	2684	2694	2327	1893	2081	2261	621	781	378	256	243	261	711	308	320	441	122	256	23.9363	26.3971	27.5686	30.4226	32.1413	33.7506	40.7781	47.761	50.2229	31.0096	33.359	35.4442	86.8965	70.7218	82.0426	70.1018	81.3694	71.3021	114.822	89.7599	72.6082	102.653	49.9004
K06A5.6.2	WBGene00019433	acdh-3	1363	1559	1522	1889	1828	2061	2684	2694	2327	1893	2081	2261	621	781	378	256	243	261	711	308	320	441	122	256	23.9363	26.3971	27.5686	30.4226	32.1413	33.7506	40.7781	47.761	50.2229	31.0096	33.359	35.4442	86.8965	70.7218	82.0426	70.1018	81.3694	71.3021	114.822	89.7599	72.6082	102.653	49.9004
T10E9.9a.1	WBGene00020419	acdh-4	8	22	13	12	12	12	20	17	31	19	14	27	0	0	0	0	0	0	0	0	0	0	0	0	0.140492	0.372506	0.235475	0.193261	0.210993	0.19651	0.303861	0.301387	0.669063	0.311243	0.224424	0.423261	0	0	0	0	0	0	0	0	0	0	0
T10E9.9b.1	WBGene00020419	acdh-4	8	26	14	13	12	14	21	18	38	20	16	29	0	0	10	0	0	0	0	0	0	0	0	0	0.140492	0.440234	0.253588	0.209366	0.210993	0.229262	0.319054	0.319116	0.820142	0.327624	0.256484	0.454613	0	0	2.17044	0	0	0	0	0	0	0	0
C37A2.3.1	WBGene00016491	acdh-5	0	1	4	0	3	1	3	0	0	2	1	0	0	0	0	0	0	0	0	0	0	0	0	0	0	0.0169321	0.0724537	0	0.0527482	0.0163758	0.0455791	0	0	0.0327624	0.0160303	0	0	0	0	0	0	0	0	0	0	0	0
C02D5.1.1	WBGene00015335	acdh-6	22	30	39	25	27	17	33	36	36	17	30	35	5	15	1	0	0	0	17	0	4	7	0	0	0.386353	0.507963	0.706424	0.402628	0.474734	0.278389	0.501371	0.638232	0.776977	0.27848	0.480908	0.548671	0.699649	1.35829	0.217044	0	0	0	2.74539	0	0.907603	1.62941	0
T25G12.5.1	WBGene00020812	acdh-7	2649	2946	3488	3358	2761	3756	2929	3223	2352	2823	2864	3233	576	661	368	256	254	96	318	322	233	233	144	147	46.5204	49.8819	63.1796	54.081	48.546	61.5076	44.5004	57.1395	50.7625	46.2441	45.9106	50.6816	80.5996	59.8554	79.8722	70.1018	85.0528	26.2261	51.3549	93.8399	52.8679	54.236	58.8989
K05F1.3.1	WBGene00019406	acdh-8	2	3	1	2	0	0	2	2	0	2	0	2	0	0	0	0	0	0	0	0	0	0	0	0	0.035123	0.0507963	0.0181134	0.0322102	0	0	0.0303861	0.0354573	0	0.0327624	0	0.0313527	0	0	0	0	0	0	0	0	0	0	0
F28A10.6.1	WBGene00017874	acdh-9	597	670	713	806	720	815	1078	1077	866	867	867	974	105	227	128	66	64	110	210	158	78	110	53	131	10.4842	11.3445	12.9149	12.9807	12.6596	13.3463	16.3781	19.0938	18.6906	14.2025	13.8982	15.2687	14.6926	20.5555	27.7816	18.0731	21.4306	30.0507	33.9136	46.0457	17.6983	25.605	21.6781
K09H11.1.1	WBGene00019599	acds-10	1615	1714	1863	1709	1500	1795	1388	1687	1063	1611	1699	1922	198	349	185	77	122	122	141	121	120	161	81	96	28.3618	29.0216	33.7453	27.5236	26.3741	29.3946	21.0879	29.9083	22.9424	26.3901	27.2354	30.1299	27.7061	31.6029	40.1531	21.0853	40.8521	33.329	22.7706	35.2628	27.2281	37.4764	33.1306
K09H11.1.2	WBGene00019599	acds-10	1615	1714	1863	1709	1500	1795	1388	1687	1063	1611	1699	1922	198	349	185	77	122	122	141	121	120	161	81	96	28.3618	29.0216	33.7453	27.5236	26.3741	29.3946	21.0879	29.9083	22.9424	26.3901	27.2354	30.1299	27.7061	31.6029	40.1531	21.0853	40.8521	33.329	22.7706	35.2628	27.2281	37.4764	33.1306
W09B12.1.1	WBGene00000035	ace-1	353	334	344	229	159	205	259	207	170	198	216	244	8	61	23	0	0	7	9	0	21	5	4	4	6.19921	5.65532	6.23102	3.68807	2.79566	3.35705	3.935	3.66983	3.66906	3.24348	3.46253	3.82502	1.11944	5.52372	4.99201	0	0	1.91232	1.45344	0	4.76491	1.16386	1.63608
W09B12.1.2	WBGene00000035	ace-1	353	334	344	229	159	205	259	207	170	198	216	244	8	61	23	0	0	7	9	0	21	5	4	4	6.19921	5.65532	6.23102	3.68807	2.79566	3.35705	3.935	3.66983	3.66906	3.24348	3.46253	3.82502	1.11944	5.52372	4.99201	0	0	1.91232	1.45344	0	4.76491	1.16386	1.63608
Y44E3A.2.1	WBGene00000036	ace-2	906	866	738	840	750	759	826	676	616	835	880	899	27	30	29	26	8	7	0	0	43	10	3	3	15.9107	14.6632	13.3677	13.5283	13.1871	12.4293	12.5495	11.9846	13.2949	13.6783	14.1066	14.093	3.77811	2.71658	6.29428	7.11971	2.67883	1.91232	0	0	9.75673	2.32773	1.22706
Y48B6A.8.1	WBGene00000037	ace-3	67	96	76	86	79	86	81	76	68	96	76	91	5	10	11	0	4	0	0	13	0	0	4	0	1.17662	1.62548	1.37662	1.38504	1.38904	1.40832	1.23064	1.34738	1.46762	1.57259	1.2183	1.42655	0.699649	0.905528	2.38748	0	1.33941	0	0	3.78857	0	0	1.63608
Y48B6A.7.1	WBGene00000038	ace-4	25	16	16	22	19	19	26	18	33	21	32	33	0	0	4	0	0	0	0	0	0	0	0	0	0.439037	0.270913	0.289815	0.354312	0.334072	0.311141	0.395019	0.319116	0.712229	0.344005	0.512968	0.517319	0	0	0.868176	0	0	0	0	0	0	0	0
C44B7.10.1	WBGene00016630	acer-1	4222	4891	6841	4411	4164	5375	6359	7368	4931	5789	6835	8908	796	1403	605	289	284	519	991	522	616	572	332	564	74.1446	82.8149	123.914	71.0397	73.2146	88.0201	96.6126	130.625	106.424	94.8307	109.567	139.645	111.384	127.046	131.312	79.1383	95.0984	141.785	160.04	152.126	139.771	133.146	135.795
C44B7.10.2	WBGene00016630	acer-1	4222	4891	6841	4411	4164	5375	6359	7368	4931	5789	6835	8908	797	1406	605	299	284	519	991	522	616	572	332	568	74.1446	82.8149	123.914	71.0397	73.2146	88.0201	96.6126	130.625	106.424	94.8307	109.567	139.645	111.524	127.317	131.312	81.8767	95.0984	141.785	160.04	152.126	139.771	133.146	135.795
C43E11.1.1	WBGene00016601	acin-1	342	321	301	288	291	290	337	377	257	385	392	436	66	70	29	18	30	26	50	36	49	77	36	50	6.00603	5.4352	5.45214	4.63827	5.11658	4.74899	5.12006	6.68371	5.54675	6.30676	6.28386	6.83488	9.23537	6.3387	6.29428	4.92903	10.0456	7.10289	8.07467	10.4914	11.1181	17.9235	14.7247
F59F4.4.1	WBGene00010339	acl-1	360	373	377	607	529	635	658	608	528	467	544	677	43	85	30	72	28	36	48	0	32	55	17	18	6.32214	6.31567	6.82876	9.7758	9.30127	10.3987	9.99702	10.779	11.3957	7.65002	8.72046	10.6129	6.01699	7.69699	6.51132	19.7161	9.3759	9.83478	7.75168	0	7.26082	12.8025	6.95334
F28B3.9.1	WBGene00017888	acl-11	182	183	174	163	142	169	196	204	131	170	192	229	18	68	16	0	9	11	19	0	13	10	11	7	3.19619	3.09857	3.15174	2.62513	2.49675	2.76752	2.97784	3.61665	2.82733	2.7848	3.07781	3.58988	2.51874	6.15759	3.4727	0	3.01368	3.00507	3.06837	0	2.94971	2.32773	4.49922
F28B3.9.2	WBGene00017888	acl-11	182	183	174	163	142	169	196	204	131	170	192	229	18	68	16	0	9	11	19	0	13	10	11	7	3.19619	3.09857	3.15174	2.62513	2.49675	2.76752	2.97784	3.61665	2.82733	2.7848	3.07781	3.58988	2.51874	6.15759	3.4727	0	3.01368	3.00507	3.06837	0	2.94971	2.32773	4.49922
C01C10.3.1	WBGene00015295	acl-12	2097	2057	2876	1405	1136	1679	1395	2096	1125	1828	1840	2168	328	501	270	74	79	161	91	59	112	122	60	83	36.8264	34.8293	52.0942	22.6277	19.974	27.495	21.1943	37.1593	24.2805	29.9448	29.4957	33.9863	45.897	45.367	58.6019	20.2638	26.4534	43.9833	14.6959	17.1943	25.4129	28.3983	24.5412
F08G5.2a.1	WBGene00008581	acl-13	0	2	0	0	0	1	0	0	0	1	0	0	0	0	0	0	0	0	0	0	0	0	0	0	0	0.0338642	0	0	0	0.0163758	0	0	0	0.0163812	0	0	0	0	0	0	0	0	0	0	0	0	0
F08G5.2b.1	WBGene00008581	acl-13	0	0	0	0	0	0	0	0	0	1	0	0	0	0	0	0	0	0	0	0	0	0	0	0	0	0	0	0	0	0	0	0	0	0.0163812	0	0	0	0	0	0	0	0	0	0	0	0	0
K07B1.5.1	WBGene00019465	acl-14	989	1191	1081	653	683	798	760	766	602	800	785	862	107	211	113	78	26	42	57	45	53	34	18	20	17.3683	20.1661	19.5806	10.5166	12.009	13.0679	11.5467	13.5802	12.9928	13.105	12.5837	13.513	14.9725	19.1066	24.526	21.3591	8.7062	11.4739	9.20512	13.1143	12.0257	7.91427	7.36236
T06E8.1a.1	WBGene00011543	acl-2	427	456	322	442	357	376	396	373	276	428	440	496	101	93	31	34	20	13	23	59	55	65	35	27	7.49876	7.72103	5.83252	7.11846	6.27704	6.15731	6.01645	6.61279	5.95682	7.01115	7.05331	7.77546	14.1329	8.42141	6.72836	9.31039	6.69707	3.55145	3.71435	17.1943	12.4795	15.1302	14.3157
T06E8.1b.1	WBGene00011543	acl-2	294	321	223	305	251	251	275	260	205	299	289	335	43	32	18	34	8	9	19	37	36	43	29	20	5.16308	5.4352	4.03929	4.91206	4.41327	4.11033	4.17809	4.60945	4.42445	4.89798	4.63274	5.25157	6.01699	2.89769	3.90679	9.31039	2.67883	2.45869	3.06837	10.7828	8.16843	10.0092	11.8616
T06E8.1b.2	WBGene00011543	acl-2	294	321	223	305	251	251	275	260	205	299	289	335	43	32	18	34	8	9	19	37	36	43	29	20	5.16308	5.4352	4.03929	4.91206	4.41327	4.11033	4.17809	4.60945	4.42445	4.89798	4.63274	5.25157	6.01699	2.89769	3.90679	9.31039	2.67883	2.45869	3.06837	10.7828	8.16843	10.0092	11.8616
ZK809.2.1	WBGene00006491	acl-3	144	142	124	157	165	147	247	212	169	169	188	161	19	34	19	19	11	11	14	5	2	9	6	8	2.52885	2.40436	2.24606	2.5285	2.90115	2.40725	3.75268	3.75848	3.64747	2.76842	3.01369	2.52389	2.65867	3.0788	4.12384	5.20287	3.68339	3.00507	2.26091	1.45714	0.453801	2.09495	2.45412
ZK809.2.2	WBGene00006491	acl-3	144	142	124	157	165	147	247	212	169	169	188	161	19	34	19	19	11	11	14	5	2	9	6	8	2.52885	2.40436	2.24606	2.5285	2.90115	2.40725	3.75268	3.75848	3.64747	2.76842	3.01369	2.52389	2.65867	3.0788	4.12384	5.20287	3.68339	3.00507	2.26091	1.45714	0.453801	2.09495	2.45412
F49H12.6a.1	WBGene00018657	acl-4	4990	5182	3327	3320	3003	3122	2492	2004	1640	3399	2986	3038	271	444	244	53	81	203	58	165	108	104	68	170	87.6318	87.7421	60.2634	53.469	52.801	51.1254	37.8611	35.5283	35.3956	55.6797	47.8663	47.6247	37.921	40.2055	52.9587	14.5133	27.1231	55.4572	9.36662	48.0857	24.5053	24.2084	27.8134
F49H12.6b.1	WBGene00018657	acl-4	3220	3522	2214	2167	1980	2088	1612	1353	1137	2243	2027	2024	114	191	91	24	27	69	19	115	68	35	45	51	56.548	59.6348	40.1031	34.8998	34.8138	34.1927	24.4912	23.9869	24.5395	36.743	32.4933	31.7289	15.952	17.2956	19.751	6.57204	9.04105	18.85	3.06837	33.5143	15.4292	8.14704	18.4059
R07E3.5a.1	WBGene00011106	acl-5	847	1023	914	817	796	964	875	885	704	965	966	1040	241	370	244	87	112	313	109	95	56	170	41	184	14.8746	17.3215	16.5557	13.1579	13.9959	15.7863	13.2939	15.6899	15.1942	15.8078	15.4852	16.3034	33.7231	33.5045	52.9587	23.8237	37.5036	85.5079	17.6028	27.6857	12.7064	39.5713	16.7698
R07E3.5a.2	WBGene00011106	acl-5	847	1023	914	817	796	964	875	885	704	965	966	1040	241	372	244	87	112	313	109	95	56	170	41	184	14.8746	17.3215	16.5557	13.1579	13.9959	15.7863	13.2939	15.6899	15.1942	15.8078	15.4852	16.3034	33.7231	33.6857	52.9587	23.8237	37.5036	85.5079	17.6028	27.6857	12.7064	39.5713	16.7698
R07E3.5b.1	WBGene00011106	acl-5	832	982	889	800	771	924	839	867	682	940	929	1015	222	342	236	79	111	313	104	72	52	152	41	177	14.6112	16.6273	16.1028	12.8841	13.5563	15.1313	12.747	15.3708	14.7194	15.3983	14.8921	15.9115	31.0644	30.9691	51.2224	21.633	37.1688	85.5079	16.7953	20.9828	11.7988	35.3814	16.7698
F08F3.2a.1	WBGene00017261	acl-6	759	785	558	763	716	741	805	682	629	801	746	716	51	99	41	16	31	30	53	1	48	31	17	27	13.3292	13.2917	10.1073	12.2882	12.5892	12.1345	12.2304	12.091	13.5755	13.1213	11.9586	11.2242	7.13642	8.96473	8.8988	4.38136	10.3805	8.19565	8.55915	0.291428	10.8912	7.21595	6.95334
F08F3.2b.1	WBGene00017261	acl-6	626	648	467	624	600	616	645	556	517	638	631	605	50	92	26	9	30	30	46	1	30	25	15	25	10.9935	10.972	8.45897	10.0496	10.5496	10.0875	9.79951	9.85714	11.1582	10.4512	10.1151	9.48418	6.99649	8.33086	5.64314	2.46452	10.0456	8.19565	7.4287	0.291428	6.80702	5.81932	6.1353
Y46G5A.21.1	WBGene00012911	acl-7	797	768	698	610	608	676	1023	1059	712	799	849	1012	43	36	14	12	27	10	12	11	47	10	29	13	13.9965	13.0038	12.6432	9.82412	10.6903	11.0701	15.5425	18.7747	15.3669	13.0886	13.6097	15.8644	6.01699	3.2599	3.03862	3.28602	9.04105	2.73188	1.93792	3.20571	10.6643	2.32773	11.8616
Y46G5A.21.2	WBGene00012911	acl-7	797	768	698	610	608	676	1023	1059	712	799	849	1012	43	36	14	12	27	10	12	11	47	10	29	13	13.9965	13.0038	12.6432	9.82412	10.6903	11.0701	15.5425	18.7747	15.3669	13.0886	13.6097	15.8644	6.01699	3.2599	3.03862	3.28602	9.04105	2.73188	1.93792	3.20571	10.6643	2.32773	11.8616
T05H4.1.1	WBGene00020264	acl-8	487	439	348	562	478	532	476	365	342	444	409	421	46	70	20	19	42	37	25	31	22	31	7	25	8.55245	7.43319	6.30347	9.05107	8.40455	8.71194	7.23189	6.47096	7.38128	7.27325	6.55637	6.59973	6.43677	6.3387	4.34088	5.20287	14.0639	10.108	4.03734	9.03428	4.99182	7.21595	2.86314
ZK40.1.1	WBGene00022646	acl-9	707	740	695	760	662	730	774	679	621	687	676	742	78	149	71	27	47	68	46	49	50	64	35	28	12.416	12.5297	12.5888	12.2399	11.6398	11.9544	11.7594	12.0378	13.4028	11.2539	10.8365	11.6318	10.9145	13.4924	15.4101	7.39355	15.7381	18.5768	7.4287	14.28	11.345	14.8974	14.3157
ZK40.1.2	WBGene00022646	acl-9	707	740	695	760	662	730	774	679	621	687	676	742	78	149	71	27	47	68	46	49	50	64	35	28	12.416	12.5297	12.5888	12.2399	11.6398	11.9544	11.7594	12.0378	13.4028	11.2539	10.8365	11.6318	10.9145	13.4924	15.4101	7.39355	15.7381	18.5768	7.4287	14.28	11.345	14.8974	14.3157
D1005.1.1	WBGene00016995	acly-1	17028	17953	12923	13642	13514	15253	10378	8407	6718	11801	10901	10210	3570	5399	1671	1479	1428	1257	1879	787	1179	1425	692	924	299.037	303.982	234.08	219.706	237.613	249.781	157.673	149.045	144.992	193.314	174.746	160.055	499.55	488.895	362.681	405.002	478.171	343.398	303.446	229.354	267.516	331.701	283.042
B0365.1.1	WBGene00007150	acly-2	1303	1364	1274	1269	1138	1310	1373	1421	1107	1104	1011	1092	507	943	366	225	243	314	414	233	236	262	125	143	22.8826	23.0954	23.0765	20.4374	20.0092	21.4523	20.8601	25.1924	23.892	18.0848	16.2066	17.1185	70.9445	85.3913	79.4381	61.6129	81.3694	85.7811	66.8583	67.9028	53.5486	60.9864	51.1275
C42D8.5a.1	WBGene00000039	acn-1	101	87	83	103	77	98	85	109	72	113	106	136	0	4	2	0	0	0	0	0	4	0	0	0	1.77371	1.47309	1.50341	1.65883	1.35387	1.60483	1.29141	1.93242	1.55395	1.85107	1.69921	2.13198	0	0.362211	0.434088	0	0	0	0	0	0.907603	0	0
C42D8.5a.2	WBGene00000039	acn-1	101	87	83	103	77	98	85	109	72	113	106	136	0	4	2	0	0	0	0	0	4	0	0	0	1.77371	1.47309	1.50341	1.65883	1.35387	1.60483	1.29141	1.93242	1.55395	1.85107	1.69921	2.13198	0	0.362211	0.434088	0	0	0	0	0	0.907603	0	0
C42D8.5b.1	WBGene00000039	acn-1	78	67	66	83	71	79	58	88	45	89	74	87	0	0	0	0	0	0	0	0	4	0	0	0	1.3698	1.13445	1.19549	1.33672	1.24838	1.29369	0.881197	1.56012	0.971221	1.45793	1.18624	1.36384	0	0	0	0	0	0	0	0	0.907603	0	0
ZK455.1.1	WBGene00000040	aco-1	4909	5693	5597	6181	5859	7019	7232	7904	5437	6345	6734	8013	711	1229	320	407	339	438	754	426	592	426	336	373	86.2094	96.3944	101.381	99.5457	103.017	114.942	109.876	140.127	117.345	103.939	107.948	125.614	99.4902	111.289	69.4541	111.451	113.515	119.656	121.766	124.148	134.325	99.1611	137.431
ZK455.1.2	WBGene00000040	aco-1	4909	5693	5597	6181	5859	7019	7232	7904	5437	6345	6734	8013	711	1229	320	407	339	438	754	426	592	426	336	373	86.2094	96.3944	101.381	99.5457	103.017	114.942	109.876	140.127	117.345	103.939	107.948	125.614	99.4902	111.289	69.4541	111.451	113.515	119.656	121.766	124.148	134.325	99.1611	137.431
F54H12.1a.1	WBGene00000041	aco-2	17966	22162	21968	23550	21313	23029	33916	30439	25325	24922	26159	28650	3496	6129	3327	2150	1817	3059	4699	3279	3498	2847	1785	2683	315.51	375.249	397.916	379.275	374.741	377.119	515.287	539.643	546.582	408.252	419.335	449.127	489.195	554.998	722.105	588.745	608.429	835.683	758.858	955.594	793.699	662.704	730.101
F54H12.1c.1	WBGene00000041	aco-2	16962	20737	20434	22153	19961	21552	31867	28247	23598	23318	24351	26692	3020	5300	2823	1758	1518	2179	3982	2559	2855	2415	1409	2158	297.878	351.121	370.13	356.777	350.969	352.932	484.157	500.782	509.308	381.977	390.353	418.433	422.588	479.93	612.715	481.402	508.308	595.277	643.067	745.765	647.802	562.146	576.309
F54H12.1c.2	WBGene00000041	aco-2	16962	20737	20434	22153	19961	21552	31867	28247	23598	23318	24351	26692	3020	5300	2823	1758	1518	2179	3982	2559	2855	2415	1409	2158	297.878	351.121	370.13	356.777	350.969	352.932	484.157	500.782	509.308	381.977	390.353	418.433	422.588	479.93	612.715	481.402	508.308	595.277	643.067	745.765	647.802	562.146	576.309
F08A8.1a.1	WBGene00008564	acox-1.1	2135	2326	2219	2583	2260	2406	2294	2224	1607	2308	2225	2529	323	464	301	251	129	86	207	214	212	192	88	108	37.4938	39.384	40.1937	41.5995	39.737	39.4003	34.8528	39.4286	34.6834	37.8078	35.6673	39.6454	45.1974	42.0165	65.3302	68.7326	43.1961	23.4942	33.4291	62.3657	48.103	44.6923	35.9938
F08A8.1a.2	WBGene00008564	acox-1.1	2135	2326	2219	2583	2260	2406	2294	2224	1607	2308	2225	2529	323	464	301	251	129	86	207	214	212	192	88	108	37.4938	39.384	40.1937	41.5995	39.737	39.4003	34.8528	39.4286	34.6834	37.8078	35.6673	39.6454	45.1974	42.0165	65.3302	68.7326	43.1961	23.4942	33.4291	62.3657	48.103	44.6923	35.9938
F08A8.1b.1	WBGene00008564	acox-1.1	1865	2062	1978	2260	1970	2116	2010	1933	1409	2015	1959	2246	231	342	232	220	106	86	172	197	179	148	76	79	32.7522	34.914	35.8284	36.3976	34.638	34.6513	30.538	34.2695	30.41	33.0081	31.4033	35.209	32.3238	30.9691	50.3542	60.2437	35.4945	23.4942	27.7769	57.4114	40.6152	34.4503	31.0855
F08A8.1b.2	WBGene00008564	acox-1.1	1865	2062	1978	2260	1970	2116	2010	1933	1409	2015	1959	2246	231	342	232	220	106	86	172	197	179	148	76	79	32.7522	34.914	35.8284	36.3976	34.638	34.6513	30.538	34.2695	30.41	33.0081	31.4033	35.209	32.3238	30.9691	50.3542	60.2437	35.4945	23.4942	27.7769	57.4114	40.6152	34.4503	31.0855
F08A8.1c.1	WBGene00008564	acox-1.1	2135	2326	2216	2583	2260	2406	2293	2223	1607	2308	2225	2529	320	447	293	251	129	86	207	214	212	188	88	108	37.4938	39.384	40.1394	41.5995	39.737	39.4003	34.8377	39.4108	34.6834	37.8078	35.6673	39.6454	44.7776	40.4771	63.5939	68.7326	43.1961	23.4942	33.4291	62.3657	48.103	43.7613	35.9938
F08A8.1c.2	WBGene00008564	acox-1.1	2135	2326	2216	2583	2260	2406	2293	2223	1607	2308	2225	2529	320	447	293	251	129	86	207	214	212	188	88	108	37.4938	39.384	40.1394	41.5995	39.737	39.4003	34.8377	39.4108	34.6834	37.8078	35.6673	39.6454	44.7776	40.4771	63.5939	68.7326	43.1961	23.4942	33.4291	62.3657	48.103	43.7613	35.9938
F08A8.2.1	WBGene00008565	acox-1.2	3405	3938	2610	3533	3177	3300	3061	2467	2063	4640	4728	4066	427	618	226	178	142	141	281	196	149	205	172	159	59.7969	66.6786	47.276	56.8994	55.8604	54.0403	46.5059	43.7366	44.5251	76.0087	75.791	63.7399	59.7501	55.9616	49.0519	48.7426	47.5492	38.5195	45.3796	57.12	33.8082	47.7184	70.3514
F08A8.3.1	WBGene00008566	acox-1.3	126	153	95	127	112	107	148	134	119	165	171	174	3	0	1	13	0	0	26	0	14	11	1	0	2.21275	2.59061	1.72078	2.04535	1.96927	1.75221	2.24857	2.37564	2.56834	2.7029	2.74117	2.72768	0.41979	0	0.217044	3.55986	0	0	4.19883	0	3.17661	2.5605	0.40902
F08A8.4.1	WBGene00008567	acox-1.4	3086	3982	2192	3155	2646	2943	2907	2625	2169	3301	2976	3382	277	357	114	196	110	102	242	160	186	207	85	95	54.1948	67.4236	39.7046	50.8116	46.524	48.1941	44.1662	46.5378	46.8128	54.0743	47.706	53.0173	38.7606	32.3274	24.743	53.6717	36.8339	27.8652	39.0814	46.6285	42.2035	48.1839	34.7667
F08A8.4.2	WBGene00008567	acox-1.4	3086	3982	2192	3155	2646	2943	2907	2625	2169	3301	2976	3382	277	357	114	196	110	102	242	160	186	207	85	95	54.1948	67.4236	39.7046	50.8116	46.524	48.1941	44.1662	46.5378	46.8128	54.0743	47.706	53.0173	38.7606	32.3274	24.743	53.6717	36.8339	27.8652	39.0814	46.6285	42.2035	48.1839	34.7667
C48B4.1.1	WBGene00008167	acox-1.5	2561	1512	4592	1674	1636	2303	1339	1843	869	1618	1808	1966	308	238	446	114	61	91	114	24	118	79	89	75	44.975	25.6013	83.1769	26.96	28.7654	37.7135	20.3435	32.6739	18.7554	26.5048	28.9827	30.8197	43.0984	21.5516	96.8016	31.2172	20.4261	24.8601	18.4102	6.99428	26.7743	18.389	36.4028
F59F4.1.1	WBGene00010336	acox-1.6	770	858	1178	825	616	980	902	1287	729	803	841	1069	120	149	115	88	25	106	112	110	68	65	34	81	13.5223	14.5277	21.3376	13.2867	10.831	16.0483	13.7041	22.8168	15.7338	13.1541	13.4814	16.758	16.7916	13.4924	24.9601	24.0975	8.37134	28.958	18.0873	32.0571	15.4292	15.1302	13.9067
F58F9.7.1	WBGene00019060	acox-3	3928	4441	3853	3659	2835	3393	2466	3043	1708	3375	2913	3883	661	954	511	354	197	218	216	175	166	402	136	260	68.9815	75.1954	69.791	58.9286	49.8471	55.5632	37.4661	53.9483	36.8632	55.2865	46.6961	60.8712	92.4937	86.3874	110.909	96.9376	65.9662	59.555	34.8826	51	37.6655	93.5746	55.6267
F58F9.7.2	WBGene00019060	acox-3	3928	4441	3853	3659	2835	3393	2466	3043	1708	3375	2913	3883	661	954	511	354	197	218	216	175	166	402	136	260	68.9815	75.1954	69.791	58.9286	49.8471	55.5632	37.4661	53.9483	36.8632	55.2865	46.6961	60.8712	92.4937	86.3874	110.909	96.9376	65.9662	59.555	34.8826	51	37.6655	93.5746	55.6267
F58F9.7.3	WBGene00019060	acox-3	3928	4441	3853	3659	2835	3393	2466	3043	1708	3375	2913	3883	661	954	511	354	197	218	216	175	166	402	136	260	68.9815	75.1954	69.791	58.9286	49.8471	55.5632	37.4661	53.9483	36.8632	55.2865	46.6961	60.8712	92.4937	86.3874	110.909	96.9376	65.9662	59.555	34.8826	51	37.6655	93.5746	55.6267
ZK563.6.1	WBGene00022770	acp-1	163	253	184	193	205	209	234	208	204	205	233	220	51	44	15	0	0	5	45	17	31	11	15	6	2.86252	4.28382	3.33287	3.10829	3.60446	3.42255	3.55517	3.68756	4.40287	3.35814	3.73505	3.44879	7.13642	3.98432	3.25566	0	0	1.36594	7.2672	4.95428	7.03392	2.5605	6.1353
ZK563.6.2	WBGene00022770	acp-1	163	253	184	193	205	209	234	208	204	205	233	220	51	44	15	0	0	5	45	17	31	11	15	6	2.86252	4.28382	3.33287	3.10829	3.60446	3.42255	3.55517	3.68756	4.40287	3.35814	3.73505	3.44879	7.13642	3.98432	3.25566	0	0	1.36594	7.2672	4.95428	7.03392	2.5605	6.1353
F14E5.4.1	WBGene00008802	acp-2	22	28	25	21	18	19	32	60	24	20	20	21	20	55	13	23	9	24	15	3	20	7	3	16	0.386353	0.474099	0.452836	0.338207	0.316489	0.311141	0.486177	1.06372	0.517984	0.327624	0.320605	0.329203	2.7986	4.98041	2.82157	6.29821	3.01368	6.55652	2.4224	0.874285	4.53801	1.62941	1.22706
F14E5.4.2	WBGene00008802	acp-2	22	28	25	21	18	19	32	60	24	20	20	21	20	55	13	23	9	24	15	3	20	7	3	16	0.386353	0.474099	0.452836	0.338207	0.316489	0.311141	0.486177	1.06372	0.517984	0.327624	0.320605	0.329203	2.7986	4.98041	2.82157	6.29821	3.01368	6.55652	2.4224	0.874285	4.53801	1.62941	1.22706
F14E5.3.1	WBGene00008801	acp-3	0	0	0	0	0	0	1	0	1	0	0	0	0	0	0	0	0	0	0	0	0	0	0	0	0	0	0	0	0	0	0.015193	0	0.0215827	0	0	0	0	0	0	0	0	0	0	0	0	0	0
F14E5.6.1	WBGene00008804	acp-4	0	0	1	0	0	0	0	2	0	1	1	2	0	0	0	0	0	0	0	0	0	0	0	0	0	0	0.0181134	0	0	0	0	0.0354573	0	0.0163812	0.0160303	0.0313527	0	0	0	0	0	0	0	0	0	0	0
F13D11.1.1	WBGene00017427	acp-5	454	426	467	376	330	372	369	378	288	402	392	510	91	140	49	0	26	21	26	0	23	12	15	10	7.97292	7.21307	8.45897	6.05552	5.80231	6.09181	5.60623	6.70144	6.21581	6.58524	6.28386	7.99493	12.7336	12.6774	10.6352	0	8.7062	5.73695	4.19883	0	5.21872	2.79327	6.1353
Y73B6BL.24.1	WBGene00022245	acp-6	47174	60659	55378	58288	52915	56148	59038	50676	48021	53227	54404	51052	31965	53174	14650	12887	10883	10594	21455	9482	13874	14444	7742	7896	828.446	1027.08	1003.09	938.735	930.391	919.47	896.967	898.418	1036.42	871.922	872.11	800.308	4472.86	4815.06	3179.69	3528.91	3644.21	2894.16	3464.84	2763.32	3148.02	3362.17	3166.63
Y73B6BL.25.1	WBGene00022246	acp-7	300	357	281	359	341	362	416	361	386	396	450	426	165	234	64	63	56	55	147	114	69	104	45	62	5.26845	6.04476	5.08987	5.78174	5.99572	5.92805	6.32031	6.40005	8.33092	6.48695	7.21361	6.67811	23.0884	21.1894	13.8908	17.2516	18.7518	15.0254	23.7395	33.2228	15.6561	24.2084	18.4059
R02E12.8.1	WBGene00000049	acr-10	17	25	15	20	19	36	23	23	18	8	16	17	0	0	0	0	5	0	0	0	0	0	0	0	0.298545	0.423302	0.271701	0.322102	0.334072	0.58953	0.34944	0.407759	0.388488	0.13105	0.256484	0.266498	0	0	0	0	1.67427	0	0	0	0	0	0
D2092.3.1	WBGene00000050	acr-11	59	44	40	38	38	28	37	55	22	43	47	41	0	2	0	0	0	0	8	0	0	0	0	0	1.03613	0.745012	0.724537	0.611994	0.668144	0.458523	0.562143	0.975077	0.474819	0.704391	0.753422	0.642729	0	0.181106	0	0	0	0	1.29195	0	0	0	0
R01E6.4a.1	WBGene00000051	acr-12	76	40	78	49	30	59	90	68	75	54	80	58	10	1	5	0	0	17	8	0	2	3	2	0	1.33467	0.677284	1.41285	0.789151	0.527482	0.966174	1.36737	1.20555	1.6187	0.884584	1.28242	0.909227	1.3993	0.0905528	1.08522	0	0	4.6442	1.29195	0	0.453801	0.698318	0.81804
R01E6.4b.1	WBGene00000051	acr-12	60	39	66	45	26	57	80	65	58	51	76	53	10	0	5	0	0	17	0	0	2	0	2	0	1.05369	0.660352	1.19549	0.72473	0.457151	0.933423	1.21544	1.15236	1.2518	0.835441	1.2183	0.830845	1.3993	0	1.08522	0	0	4.6442	0	0	0.453801	0	0.81804
T05C12.2.1	WBGene00000053	acr-14	5	8	4	2	1	2	2	7	5	9	8	12	0	0	0	0	0	0	0	0	0	0	0	0	0.0878075	0.135457	0.0724537	0.0322102	0.0175827	0.0327517	0.0303861	0.124101	0.107913	0.147431	0.128242	0.188116	0	0	0	0	0	0	0	0	0	0	0
F25G6.4.1	WBGene00000054	acr-15	106	127	111	143	103	120	128	110	119	118	152	139	9	16	1	0	1	0	14	0	8	2	2	3	1.86152	2.15038	2.01059	2.30303	1.81102	1.9651	1.94471	1.95015	2.56834	1.93298	2.4366	2.17901	1.25937	1.44885	0.217044	0	0.334854	0	2.26091	0	1.81521	0.465545	0.81804
F25G6.3.1	WBGene00000055	acr-16	160	165	102	203	155	186	216	156	139	204	184	142	21	8	0	0	6	1	10	0	2	7	0	12	2.80984	2.7938	1.84757	3.26934	2.72533	3.04591	3.2817	2.76567	2.99999	3.34176	2.94957	2.22604	2.93853	0.724423	0	0	2.00912	0.273188	1.61493	0	0.453801	1.62941	0
F53E10.2b.1	WBGene00000056	acr-17	16	24	24	20	12	27	16	10	18	13	17	15	3	12	0	0	0	0	0	0	0	4	0	0	0.280984	0.40637	0.434722	0.322102	0.210993	0.442148	0.243089	0.177287	0.388488	0.212955	0.272514	0.235145	0.41979	1.08663	0	0	0	0	0	0	0	0.93109	0
F53E10.2g.1	WBGene00000056	acr-17	16	22	23	20	11	27	16	10	18	13	17	15	3	12	0	0	0	0	0	0	0	4	0	0	0.280984	0.372506	0.416609	0.322102	0.19341	0.442148	0.243089	0.177287	0.388488	0.212955	0.272514	0.235145	0.41979	1.08663	0	0	0	0	0	0	0	0.93109	0
F53E10.2h.1	WBGene00000056	acr-17	2	2	10	1	4	10	3	1	0	1	4	2	0	0	0	0	0	0	0	0	0	0	0	0	0.035123	0.0338642	0.181134	0.0161051	0.070331	0.163758	0.0455791	0.0177287	0	0.0163812	0.064121	0.0313527	0	0	0	0	0	0	0	0	0	0	0
F53E10.2i.1	WBGene00000056	acr-17	1	1	6	0	4	6	1	0	0	1	2	1	0	0	0	0	0	0	0	0	0	0	0	0	0.0175615	0.0169321	0.108681	0	0.070331	0.098255	0.015193	0	0	0.0163812	0.0320605	0.0156763	0	0	0	0	0	0	0	0	0	0	0
F28F8.1.1	WBGene00000057	acr-18	52	69	71	52	61	59	80	75	100	68	98	81	15	21	12	0	0	0	7	0	12	13	6	4	0.913198	1.16831	1.28605	0.837466	1.07255	0.966174	1.21544	1.32965	2.15827	1.11392	1.57096	1.26978	2.09895	1.90161	2.60453	0	0	0	1.13045	0	2.72281	3.02604	2.45412
C31H5.3a.1	WBGene00000058	acr-19	33	40	32	47	34	38	72	48	47	35	32	63	1	0	0	9	0	0	0	0	0	1	0	4	0.579529	0.677284	0.57963	0.75694	0.597813	0.622282	1.0939	0.850976	1.01439	0.573342	0.512968	0.987609	0.13993	0	0	2.46452	0	0	0	0	0	0.232773	0
C31H5.3b.1	WBGene00000058	acr-19	33	40	32	46	33	38	72	47	47	35	32	63	1	0	0	9	0	0	0	0	0	1	0	4	0.579529	0.677284	0.57963	0.740835	0.580231	0.622282	1.0939	0.833247	1.01439	0.573342	0.512968	0.987609	0.13993	0	0	2.46452	0	0	0	0	0	0.232773	0
K11G12.2.1	WBGene00000042	acr-2	24	26	30	25	42	29	31	47	42	43	47	39	3	0	0	0	0	0	0	0	11	0	0	0	0.421476	0.440234	0.543403	0.402628	0.738475	0.474899	0.470984	0.833247	0.906473	0.704391	0.753422	0.611377	0.41979	0	0	0	0	0	0	0	2.49591	0	0
R06A4.10a.1	WBGene00000059	acr-20	22	26	27	18	25	20	33	19	39	24	26	24	0	5	4	0	0	0	0	0	1	0	5	9	0.386353	0.440234	0.489063	0.289892	0.439569	0.327517	0.501371	0.336845	0.841725	0.393149	0.416787	0.376232	0	0.452764	0.868176	0	0	0	0	0	0.226901	0	2.0451
R06A4.10b.1	WBGene00000059	acr-20	22	25	27	18	25	20	33	19	39	24	24	24	0	5	4	0	0	0	0	0	1	0	5	9	0.386353	0.423302	0.489063	0.289892	0.439569	0.327517	0.501371	0.336845	0.841725	0.393149	0.384726	0.376232	0	0.452764	0.868176	0	0	0	0	0	0.226901	0	2.0451
R06A4.10c.1	WBGene00000059	acr-20	26	26	27	18	25	20	33	20	42	24	26	25	0	9	4	0	0	0	0	0	1	0	5	9	0.456599	0.440234	0.489063	0.289892	0.439569	0.327517	0.501371	0.354573	0.906473	0.393149	0.416787	0.391908	0	0.814975	0.868176	0	0	0	0	0	0.226901	0	2.0451
F27B3.2a.1	WBGene00000060	acr-21	19	16	23	24	28	23	19	18	15	26	34	38	4	2	0	0	0	0	0	0	0	0	0	0	0.333668	0.270913	0.416609	0.386523	0.492317	0.376644	0.288668	0.319116	0.32374	0.425911	0.545029	0.5957	0.55972	0.181106	0	0	0	0	0	0	0	0	0
F27B3.2b.1	WBGene00000060	acr-21	19	16	23	23	28	23	19	17	15	26	34	38	4	2	0	0	0	0	0	0	0	0	0	0	0.333668	0.270913	0.416609	0.370418	0.492317	0.376644	0.288668	0.301387	0.32374	0.425911	0.545029	0.5957	0.55972	0.181106	0	0	0	0	0	0	0	0	0
F27B3.2c.1	WBGene00000060	acr-21	19	16	22	24	28	22	19	18	15	26	33	37	4	2	0	0	0	0	0	0	0	0	0	0	0.333668	0.270913	0.398495	0.386523	0.492317	0.360268	0.288668	0.319116	0.32374	0.425911	0.528998	0.580024	0.55972	0.181106	0	0	0	0	0	0	0	0	0
F27B3.2d.1	WBGene00000060	acr-21	19	16	22	23	28	22	19	17	15	26	33	37	4	2	0	0	0	0	0	0	0	0	0	0	0.333668	0.270913	0.398495	0.370418	0.492317	0.360268	0.288668	0.301387	0.32374	0.425911	0.528998	0.580024	0.55972	0.181106	0	0	0	0	0	0	0	0	0
F59B1.9a.1	WBGene00000062	acr-23	16	15	12	18	8	16	21	13	15	25	17	16	2	0	0	0	0	0	8	0	0	0	0	5	0.280984	0.253981	0.217361	0.289892	0.140662	0.262013	0.319054	0.230473	0.32374	0.40953	0.272514	0.250821	0.27986	0	0	0	0	0	1.29195	0	0	0	0
F59B1.9b.1	WBGene00000062	acr-23	16	15	12	18	8	16	21	13	15	25	17	16	2	0	0	0	0	0	8	0	0	0	0	5	0.280984	0.253981	0.217361	0.289892	0.140662	0.262013	0.319054	0.230473	0.32374	0.40953	0.272514	0.250821	0.27986	0	0	0	0	0	1.29195	0	0	0	0
Y73F8A.30a.1	WBGene00013534	acr-24	20	17	13	12	14	22	22	19	10	26	23	20	9	15	6	13	6	11	0	0	0	0	0	9	0.35123	0.287846	0.235475	0.193261	0.246158	0.360268	0.334247	0.336845	0.215827	0.425911	0.368696	0.313527	1.25937	1.35829	1.30226	3.55986	2.00912	3.00507	0	0	0	0	0
Y73F8A.30b.1	WBGene00013534	acr-24	20	17	13	12	14	20	21	19	10	27	23	20	9	15	6	13	6	11	0	0	0	0	0	9	0.35123	0.287846	0.235475	0.193261	0.246158	0.327517	0.319054	0.336845	0.215827	0.442292	0.368696	0.313527	1.25937	1.35829	1.30226	3.55986	2.00912	3.00507	0	0	0	0	0
Y73B6BL.42.1	WBGene00043066	acr-25	22	33	19	17	26	30	41	15	40	32	44	47	0	1	0	0	0	0	0	0	0	0	0	0	0.386353	0.558759	0.344155	0.273787	0.457151	0.491275	0.622915	0.26593	0.863307	0.524198	0.705331	0.736787	0	0.0905528	0	0	0	0	0	0	0	0	0
K11G12.7.1	WBGene00000043	acr-3	8	5	4	11	4	7	7	14	4	11	9	4	0	0	0	0	0	0	0	0	0	0	0	0	0.140492	0.0846605	0.0724537	0.177156	0.070331	0.114631	0.106351	0.248201	0.0863307	0.180193	0.144272	0.0627053	0	0	0	0	0	0	0	0	0	0	0
K03F8.2.1	WBGene00000044	acr-5	17	15	27	14	15	11	17	10	19	13	28	19	0	4	0	0	0	0	0	0	0	6	0	5	0.298545	0.253981	0.489063	0.225472	0.263741	0.180134	0.258282	0.177287	0.410071	0.212955	0.448847	0.29785	0	0.362211	0	0	0	0	0	0	0	1.39664	0
ZK973.5.1	WBGene00000045	acr-6	9	10	10	17	12	22	22	18	13	17	16	13	1	0	0	0	0	0	0	17	0	0	0	0	0.158053	0.169321	0.181134	0.273787	0.210993	0.360268	0.334247	0.319116	0.280575	0.27848	0.256484	0.203792	0.13993	0	0	0	0	0	0	4.95428	0	0	0
T09A5.3.1	WBGene00000046	acr-7	24	30	23	25	31	18	29	27	30	30	35	33	0	3	0	0	6	0	0	0	0	0	0	0	0.421476	0.507963	0.416609	0.402628	0.545065	0.294765	0.440598	0.478674	0.647481	0.491436	0.561059	0.517319	0	0.271658	0	0	2.00912	0	0	0	0	0	0
ZC504.2.1	WBGene00000047	acr-8	30	39	32	44	53	33	59	38	55	64	59	71	1	1	0	0	3	0	0	0	0	0	0	0	0.526845	0.660352	0.57963	0.708625	0.931886	0.540403	0.89639	0.673689	1.18705	1.0484	0.945785	1.11302	0.13993	0.0905528	0	0	1.00456	0	0	0	0	0	0
ZC504.2.2	WBGene00000047	acr-8	30	39	32	44	53	33	59	38	55	64	59	71	1	1	0	0	3	0	0	0	0	0	0	0	0.526845	0.660352	0.57963	0.708625	0.931886	0.540403	0.89639	0.673689	1.18705	1.0484	0.945785	1.11302	0.13993	0.0905528	0	0	1.00456	0	0	0	0	0	0
C40C9.2.1	WBGene00000048	acr-9	12	17	11	14	13	7	9	15	5	12	23	11	0	0	0	0	0	0	0	0	0	0	2	0	0.210738	0.287846	0.199248	0.225472	0.228576	0.114631	0.136737	0.26593	0.107913	0.196574	0.368696	0.17244	0	0	0	0	0	0	0	0	0	0	0.81804
F46E10.1a.1	WBGene00018488	acs-1	10431	10876	7598	8921	8710	9056	7338	6514	4962	8606	8202	7948	1940	2680	1268	744	726	1071	1134	470	770	973	706	945	183.184	184.153	137.626	143.674	153.146	148.3	111.487	115.485	107.093	140.977	131.48	124.595	271.464	242.682	275.212	203.733	243.104	292.585	183.134	136.971	174.714	226.488	288.768
F46E10.1b.1	WBGene00018488	acs-1	10278	10707	7477	8791	8589	8964	7217	6416	4875	8483	8060	7825	1922	2654	1268	741	722	1049	1134	470	770	967	705	938	180.497	181.292	135.434	141.58	151.018	146.793	109.648	113.747	105.216	138.962	129.204	122.667	268.945	240.327	275.212	202.912	241.764	286.574	183.134	136.971	174.714	225.091	288.359
F46E10.1b.2	WBGene00018488	acs-1	10278	10707	7477	8791	8589	8964	7217	6416	4875	8483	8060	7825	1922	2654	1268	741	722	1049	1134	470	770	967	705	938	180.497	181.292	135.434	141.58	151.018	146.793	109.648	113.747	105.216	138.962	129.204	122.667	268.945	240.327	275.212	202.912	241.764	286.574	183.134	136.971	174.714	225.091	288.359
F46E10.1c.1	WBGene00018488	acs-1	9991	10323	7263	8519	8337	8712	6998	6200	4717	8211	7777	7574	1914	2646	1268	741	721	1049	1119	468	761	967	698	938	175.457	174.79	131.558	137.199	146.587	142.666	106.321	109.918	101.806	134.506	124.667	118.732	267.826	239.603	275.212	202.912	241.43	286.574	180.711	136.388	172.671	225.091	285.496
AH10.1.1	WBGene00007082	acs-10	4	6	3	1	1	4	4	3	2	7	4	2	0	0	0	0	0	0	0	0	0	0	0	0	0.070246	0.101593	0.0543403	0.0161051	0.0175827	0.0655033	0.0607722	0.053186	0.0431654	0.114668	0.064121	0.0313527	0	0	0	0	0	0	0	0	0	0	0
F41C3.3.1	WBGene00018269	acs-11	1176	1422	2138	1649	1567	2202	2175	2596	1723	2139	2483	3438	357	547	409	299	176	416	656	273	407	344	273	483	20.6523	24.0774	38.7265	26.5573	27.5522	36.0596	33.0449	46.0236	37.187	35.0394	39.8031	53.8952	49.955	49.5324	88.771	81.8767	58.9342	113.646	105.94	79.5599	92.3486	80.0738	111.662
F41C3.3.2	WBGene00018269	acs-11	1176	1422	2138	1649	1567	2202	2175	2596	1723	2139	2483	3438	361	575	441	321	222	469	686	281	419	349	279	555	20.6523	24.0774	38.7265	26.5573	27.5522	36.0596	33.0449	46.0236	37.187	35.0394	39.8031	53.8952	50.5147	52.0679	95.7164	87.9011	74.3375	128.125	110.784	81.8914	95.0714	81.2376	114.117
F25C8.4.1	WBGene00009106	acs-12	747	914	774	696	599	707	789	757	608	686	718	836	194	398	165	116	59	74	203	161	75	112	59	82	13.1184	15.4759	14.0198	11.2092	10.5321	11.5777	11.9873	13.4206	13.1223	11.2375	11.5097	13.1054	27.1464	36.04	35.8123	31.7649	19.7564	20.2159	32.7832	46.92	17.0176	26.0705	24.1322
Y65B4BL.5a.1	WBGene00022037	acs-13	2628	2627	2426	2417	2503	2721	2662	2157	1772	2622	2574	2480	503	604	320	254	198	156	302	217	234	235	122	245	46.1516	44.4806	43.9432	38.9261	44.0096	44.5586	40.4439	38.2407	38.2445	42.9515	41.2619	38.8773	70.3847	54.6939	69.4541	69.5541	66.301	42.6174	48.771	63.24	53.0948	54.7016	49.9004
Y65B4BL.5b.1	WBGene00022037	acs-13	2573	2570	2380	2376	2446	2681	2617	2117	1744	2580	2514	2432	459	581	306	243	181	130	292	217	215	230	120	236	45.1857	43.5155	43.11	38.2657	43.0074	43.9036	39.7602	37.5316	37.6402	42.2635	40.3001	38.1248	64.2278	52.6112	66.4155	66.5419	60.6085	35.5145	47.1561	63.24	48.7837	53.5377	49.0824
Y65B4BL.5c.1	WBGene00022037	acs-13	2623	2612	2412	2400	2487	2712	2642	2146	1765	2612	2544	2464	499	603	320	254	198	156	302	217	231	235	121	240	46.0638	44.2266	43.6896	38.6523	43.7283	44.4113	40.14	38.0457	38.0934	42.7877	40.781	38.6265	69.825	54.6034	69.4541	69.5541	66.301	42.6174	48.771	63.24	52.4141	54.7016	49.4914
F11A3.1.1	WBGene00008669	acs-14	2049	2399	2498	2210	1902	2388	2062	2207	1521	2239	2320	2596	197	400	200	136	59	165	232	85	122	105	71	90	35.9835	40.6201	45.2473	35.5923	33.4424	39.1055	31.3281	39.1272	32.8273	36.6775	37.1902	40.6957	27.5662	36.2211	43.4088	37.2416	19.7564	45.0761	37.4665	24.7714	27.6819	24.4411	29.0404
F11A3.1.2	WBGene00008669	acs-14	2049	2399	2498	2210	1902	2388	2062	2207	1521	2239	2320	2596	197	400	200	136	59	165	232	85	122	105	71	90	35.9835	40.6201	45.2473	35.5923	33.4424	39.1055	31.3281	39.1272	32.8273	36.6775	37.1902	40.6957	27.5662	36.2211	43.4088	37.2416	19.7564	45.0761	37.4665	24.7714	27.6819	24.4411	29.0404
R07C3.4.1	WBGene00019920	acs-15	1	0	0	0	1	0	0	1	1	1	0	0	2	0	0	0	0	0	0	0	0	0	0	0	0.0175615	0	0	0	0.0175827	0	0	0.0177287	0.0215827	0.0163812	0	0	0.27986	0	0	0	0	0	0	0	0	0	0
F47G6.2.1	WBGene00018579	acs-16	175	192	205	132	141	172	204	180	217	209	200	227	27	44	11	20	9	17	0	0	18	22	8	19	3.07326	3.25096	3.71325	2.12587	2.47917	2.81664	3.09938	3.19116	4.68344	3.42367	3.20605	3.55853	3.77811	3.98432	2.38748	5.4767	3.01368	4.6442	0	0	4.08421	5.121	3.27216
C46F4.2.1	WBGene00016716	acs-17	1212	1364	1814	1056	988	1375	831	1206	682	1177	1139	1432	211	397	293	100	75	171	132	106	94	242	86	177	21.2845	23.0954	32.8578	17.007	17.3718	22.5168	12.6254	21.3808	14.7194	19.2807	18.2585	22.4485	29.5252	35.9495	63.5939	27.3835	25.114	46.7152	21.3171	30.8914	21.3287	56.331	35.1757
C46F4.2.2	WBGene00016716	acs-17	1212	1364	1814	1056	988	1375	831	1206	682	1177	1139	1432	211	397	293	100	75	171	132	106	94	242	86	177	21.2845	23.0954	32.8578	17.007	17.3718	22.5168	12.6254	21.3808	14.7194	19.2807	18.2585	22.4485	29.5252	35.9495	63.5939	27.3835	25.114	46.7152	21.3171	30.8914	21.3287	56.331	35.1757
C46F4.2.3	WBGene00016716	acs-17	1212	1364	1814	1056	988	1375	831	1206	682	1177	1139	1432	211	405	293	100	75	171	132	106	94	242	86	177	21.2845	23.0954	32.8578	17.007	17.3718	22.5168	12.6254	21.3808	14.7194	19.2807	18.2585	22.4485	29.5252	36.6739	63.5939	27.3835	25.114	46.7152	21.3171	30.8914	21.3287	56.331	35.1757
R09E10.3.1	WBGene00011173	acs-18	1	0	1	0	0	1	1	0	0	0	0	0	0	0	0	0	0	0	0	0	0	0	0	0	0.0175615	0	0.0181134	0	0	0.0163758	0.015193	0	0	0	0	0	0	0	0	0	0	0	0	0	0	0	0
C36A4.9a.1	WBGene00007969	acs-19	17498	19920	19794	9431	10112	13413	8127	9716	4837	11417	11828	17699	3286	4567	2081	736	623	1068	684	687	536	879	549	1082	307.291	337.287	358.537	151.887	177.797	219.649	123.474	172.252	104.395	187.024	189.606	277.455	459.81	413.555	451.669	201.543	208.614	291.765	110.461	200.211	121.619	204.607	224.552
C36A4.9a.2	WBGene00007969	acs-19	17498	19920	19794	9431	10112	13413	8127	9716	4837	11417	11828	17699	3286	4567	2081	736	623	1068	684	687	536	879	549	1082	307.291	337.287	358.537	151.887	177.797	219.649	123.474	172.252	104.395	187.024	189.606	277.455	459.81	413.555	451.669	201.543	208.614	291.765	110.461	200.211	121.619	204.607	224.552
C36A4.9b.1	WBGene00007969	acs-19	17494	19915	19792	9430	10108	13409	8127	9712	4837	11416	11821	17697	3286	4563	2077	736	623	1050	659	711	527	879	549	1074	307.221	337.203	358.501	151.871	177.726	219.584	123.474	172.181	104.395	187.008	189.494	277.424	459.81	413.193	450.8	201.543	208.614	286.848	106.424	207.206	119.577	204.607	224.552
F28F8.2.1	WBGene00009221	acs-2	441	857	4299	440	808	1190	2466	5635	2068	2904	4447	9135	60	172	628	2	52	117	349	517	400	311	219	803	7.74462	14.5108	77.8696	7.08625	14.2069	19.4872	37.4661	99.901	44.633	47.571	71.2865	143.203	8.39579	15.5751	136.304	0.54767	17.4124	31.963	56.3612	150.668	90.7603	72.3923	89.5754
F28D1.9.1	WBGene00009218	acs-20	106	117	128	164	104	173	175	170	159	149	173	214	16	31	9	0	4	42	2	21	10	10	0	4	1.86152	1.98105	2.31852	2.64124	1.82861	2.83302	2.65878	3.01387	3.43165	2.4408	2.77323	3.35473	2.23888	2.80714	1.9534	0	1.33941	11.4739	0.322987	6.12	2.26901	2.32773	0
C50H11.1.1	WBGene00016849	acs-21	186	189	199	193	200	175	205	220	199	214	195	213	40	63	9	60	5	12	58	43	14	20	0	16	3.26644	3.20017	3.60457	3.10829	3.51655	2.86577	3.11457	3.90031	4.29495	3.50557	3.1259	3.33906	5.5972	5.70483	1.9534	16.4301	1.67427	3.27826	9.36662	12.5314	3.17661	4.65545	0
D1009.1a.1	WBGene00017012	acs-22	4792	5087	5742	5030	3941	5342	3380	4361	2519	4318	4297	5390	635	1076	497	242	199	219	418	142	148	281	145	187	84.1547	86.1336	104.007	81.0087	69.2936	87.4797	51.3525	77.3147	54.3668	70.734	68.882	84.4954	88.8555	97.4348	107.871	66.2681	66.6359	59.8282	67.5042	41.3828	33.5813	65.4091	59.3079
D1009.1b.1	WBGene00017012	acs-22	869	1012	1013	999	742	1122	685	893	489	831	871	1062	89	250	40	16	37	30	87	28	16	32	16	9	15.2609	17.1353	18.3489	16.089	13.0464	18.3737	10.4072	15.8317	10.5539	13.6128	13.9623	16.6483	12.4538	22.6382	8.68176	4.38136	12.3896	8.19565	14.0499	8.15999	3.63041	7.44872	6.54432
D1009.1c.1	WBGene00017012	acs-22	4791	5084	5740	5030	3940	5340	3380	4361	2516	4318	4293	5386	635	1076	494	242	199	219	418	142	148	281	145	187	84.1371	86.0828	103.971	81.0087	69.276	87.447	51.3525	77.3147	54.302	70.734	68.8179	84.4327	88.8555	97.4348	107.22	66.2681	66.6359	59.8282	67.5042	41.3828	33.5813	65.4091	59.3079
D1009.1d.1	WBGene00017012	acs-22	4134	4374	5012	4308	3429	4581	2933	3726	2171	3718	3689	4631	527	788	436	197	157	189	314	108	120	233	128	178	72.5992	74.061	90.7845	69.3808	60.2912	75.0177	44.5612	66.057	46.856	60.9053	59.1356	72.5971	73.7431	71.3556	94.6312	53.9455	52.572	51.6326	50.7089	31.4743	27.2281	54.236	52.3546
D1009.1d.2	WBGene00017012	acs-22	4134	4374	5012	4308	3429	4581	2933	3726	2171	3718	3689	4631	527	788	436	197	157	189	314	108	120	233	128	178	72.5992	74.061	90.7845	69.3808	60.2912	75.0177	44.5612	66.057	46.856	60.9053	59.1356	72.5971	73.7431	71.3556	94.6312	53.9455	52.572	51.6326	50.7089	31.4743	27.2281	54.236	52.3546
T08B1.6.1	WBGene00020343	acs-3	125	142	149	119	105	173	89	97	88	129	220	228	137	168	75	41	58	52	86	81	48	66	36	99	2.19519	2.40436	2.6989	1.91651	1.84619	2.83302	1.35218	1.71968	1.89928	2.11317	3.52666	3.5742	19.1704	15.2129	16.2783	11.2272	19.4215	14.2058	13.8884	23.6057	10.8912	15.363	14.7247
F37C12.7.1	WBGene00018152	acs-4	1042	977	916	900	937	871	958	804	717	883	930	958	204	372	169	133	119	108	97	116	159	132	78	154	18.2991	16.5427	16.5919	14.4946	16.475	14.2634	14.5549	14.2538	15.4748	14.4646	14.9081	15.0179	28.5457	33.6857	36.6804	36.4201	39.8476	29.5043	15.6649	33.8057	36.0772	30.726	31.9036
Y76A2B.3.1	WBGene00013575	acs-5	3108	3424	2742	3099	2673	3188	3288	2921	2280	3032	3256	3241	624	886	290	328	252	289	500	195	241	287	114	260	54.5811	57.9755	49.667	49.9097	46.9987	52.2062	49.9547	51.7854	49.2085	49.6678	52.1945	50.807	87.3163	80.2298	62.9428	89.8179	84.3831	78.9514	80.7467	56.8285	54.6831	66.8057	46.6283
ZK1127.2.1	WBGene00022849	acs-6	13	12	8	32	41	25	75	57	62	27	31	36	6	4	8	0	11	0	54	0	28	2	1	2	0.228299	0.203185	0.144907	0.515364	0.720893	0.409396	1.13948	1.01053	1.33813	0.442292	0.496938	0.564348	0.839579	0.362211	1.73635	0	3.68339	0	8.72064	0	6.35322	0.465545	0.40902
C01G6.7.1	WBGene00007228	acs-7	593	664	690	451	386	466	256	306	187	505	421	655	43	106	34	29	10	14	8	23	3	22	38	36	10.414	11.2429	12.4983	7.26341	6.78694	7.63114	3.88942	5.42497	4.03596	8.2725	6.74874	10.268	6.01699	9.5986	7.3795	7.94122	3.34854	3.82464	1.29195	6.70285	0.680702	5.121	15.5428
T20F7.7.1	WBGene00020634	acs-9	10	7	10	16	9	12	5	13	7	9	14	12	4	1	2	0	0	0	0	0	2	6	0	4	0.175615	0.118525	0.181134	0.257682	0.158245	0.19651	0.0759652	0.230473	0.151079	0.147431	0.224424	0.188116	0.55972	0.0905528	0.434088	0	0	0	0	0	0.453801	1.39664	0
Y71D11A.3a.1	WBGene00022104	acsd-1	139	174	122	260	223	278	306	226	244	201	223	223	89	94	85	97	59	12	131	51	114	99	40	48	2.44105	2.94618	2.20984	4.18733	3.92095	4.55248	4.64907	4.00668	5.26618	3.29262	3.57475	3.49582	12.4538	8.51197	18.4487	26.562	19.7564	3.27826	21.1556	14.8628	25.8667	23.0445	16.3608
Y71D11A.3b.1	WBGene00022104	acsd-1	139	174	122	260	223	278	306	227	244	202	223	223	86	94	78	97	57	12	131	45	113	95	40	47	2.44105	2.94618	2.20984	4.18733	3.92095	4.55248	4.64907	4.02441	5.26618	3.309	3.57475	3.49582	12.034	8.51197	16.9294	26.562	19.0867	3.27826	21.1556	13.1143	25.6398	22.1134	16.3608
T04C12.6.1	WBGene00000063	act-1	2066	3255	2882	2999	2881	3401	3689	3045	3077	3323	4142	3076	0	11	15	11	12	50	9	0	0	11	12	18	36.282	55.114	52.2029	48.2992	50.6559	55.6942	56.0471	53.9838	66.4099	54.4347	66.3973	48.2204	0	0.996081	3.25566	3.01219	4.01824	13.6594	1.45344	0	0	2.5605	4.90824
T04C12.6.2	WBGene00000063	act-1	2066	3255	2882	2999	2881	3401	3689	3045	3077	3323	4142	3076	0	11	15	11	12	50	9	0	0	11	12	18	36.282	55.114	52.2029	48.2992	50.6559	55.6942	56.0471	53.9838	66.4099	54.4347	66.3973	48.2204	0	0.996081	3.25566	3.01219	4.01824	13.6594	1.45344	0	0	2.5605	4.90824
T04C12.6.3	WBGene00000063	act-1	2066	3255	2882	2999	2881	3401	3689	3045	3077	3323	4142	3076	0	11	15	11	12	50	9	0	0	11	12	18	36.282	55.114	52.2029	48.2992	50.6559	55.6942	56.0471	53.9838	66.4099	54.4347	66.3973	48.2204	0	0.996081	3.25566	3.01219	4.01824	13.6594	1.45344	0	0	2.5605	4.90824
T04C12.6.4	WBGene00000063	act-1	2066	3255	2882	2999	2881	3401	3689	3045	3077	3323	4142	3076	0	11	15	11	12	50	9	0	0	11	12	18	36.282	55.114	52.2029	48.2992	50.6559	55.6942	56.0471	53.9838	66.4099	54.4347	66.3973	48.2204	0	0.996081	3.25566	3.01219	4.01824	13.6594	1.45344	0	0	2.5605	4.90824
T04C12.5.1	WBGene00000064	act-2	3183	4210	3755	4900	5048	5239	6919	5532	5326	6045	6884	5555	1003	1967	467	435	470	575	982	370	708	936	292	437	55.8982	71.2841	68.0159	78.9151	88.7577	85.793	105.121	98.075	114.949	99.0243	110.352	87.082	140.35	178.117	101.36	119.118	157.381	157.083	158.587	107.828	160.646	217.875	119.434
T04C12.5.2	WBGene00000064	act-2	3183	4210	3755	4900	5048	5239	6919	5532	5326	6045	6884	5555	1003	1967	467	435	470	575	982	370	708	936	292	437	55.8982	71.2841	68.0159	78.9151	88.7577	85.793	105.121	98.075	114.949	99.0243	110.352	87.082	140.35	178.117	101.36	119.118	157.381	157.083	158.587	107.828	160.646	217.875	119.434
T04C12.5.3	WBGene00000064	act-2	3183	4210	3755	4900	5048	5239	6919	5532	5326	6045	6884	5555	1003	1967	467	435	470	575	982	370	708	936	292	437	55.8982	71.2841	68.0159	78.9151	88.7577	85.793	105.121	98.075	114.949	99.0243	110.352	87.082	140.35	178.117	101.36	119.118	157.381	157.083	158.587	107.828	160.646	217.875	119.434
T04C12.4.1	WBGene00000065	act-3	3402	4923	4498	3947	4271	4542	5444	4342	4146	4684	5985	4483	91	112	131	137	57	169	168	76	61	134	34	128	59.7442	83.3567	81.4742	63.5669	75.0959	74.379	82.7109	76.9779	89.4818	76.7295	95.9411	70.277	12.7336	10.1419	28.4328	37.5154	19.0867	46.1688	27.1309	22.1486	13.8409	31.1915	13.9067
T04C12.4.2	WBGene00000065	act-3	3402	4923	4498	3947	4271	4542	5444	4342	4146	4684	5985	4483	91	112	131	137	57	169	168	76	61	134	34	128	59.7442	83.3567	81.4742	63.5669	75.0959	74.379	82.7109	76.9779	89.4818	76.7295	95.9411	70.277	12.7336	10.1419	28.4328	37.5154	19.0867	46.1688	27.1309	22.1486	13.8409	31.1915	13.9067
T04C12.4.3	WBGene00000065	act-3	3402	4923	4498	3947	4271	4542	5444	4342	4146	4684	5985	4483	91	112	131	137	57	169	168	76	61	134	34	128	59.7442	83.3567	81.4742	63.5669	75.0959	74.379	82.7109	76.9779	89.4818	76.7295	95.9411	70.277	12.7336	10.1419	28.4328	37.5154	19.0867	46.1688	27.1309	22.1486	13.8409	31.1915	13.9067
M03F4.2a.1	WBGene00000066	act-4	30818	35286	34062	34570	34404	34173	38321	26499	27753	34939	37616	33334	16955	26594	5940	3643	5179	4023	6952	1871	3028	6665	1905	3455	541.21	597.466	616.98	556.754	604.917	559.611	582.213	469.792	598.984	572.342	602.994	522.555	2372.51	2408.16	1289.24	997.581	1734.21	1099.04	1122.7	545.262	687.055	1551.43	779.183
M03F4.2b.1	WBGene00000066	act-4	29245	33543	32312	32864	32754	32664	36398	25134	26445	33235	35636	31415	16725	24820	5687	3502	5059	3815	6760	1778	2783	6418	1811	3300	513.586	567.953	585.281	529.278	575.905	534.9	552.996	445.592	570.754	544.429	571.254	492.472	2340.33	2247.52	1234.33	958.97	1694.02	1042.21	1091.7	518.16	631.465	1493.93	740.735
M03F4.2b.2	WBGene00000066	act-4	29245	33543	32312	32864	32754	32664	36398	25134	26445	33235	35636	31415	16725	24820	5687	3502	5059	3815	6760	1778	2783	6418	1811	3300	513.586	567.953	585.281	529.278	575.905	534.9	552.996	445.592	570.754	544.429	571.254	492.472	2340.33	2247.52	1234.33	958.97	1694.02	1042.21	1091.7	518.16	631.465	1493.93	740.735
M03F4.2b.3	WBGene00000066	act-4	29245	33543	32312	32864	32754	32664	36398	25134	26445	33235	35636	31415	16725	24820	5687	3502	5059	3815	6760	1778	2783	6418	1811	3300	513.586	567.953	585.281	529.278	575.905	534.9	552.996	445.592	570.754	544.429	571.254	492.472	2340.33	2247.52	1234.33	958.97	1694.02	1042.21	1091.7	518.16	631.465	1493.93	740.735
M03F4.2b.4	WBGene00000066	act-4	29245	33543	32312	32864	32754	32664	36398	25134	26445	33235	35636	31415	16725	24820	5687	3502	5059	3815	6760	1778	2783	6418	1811	3300	513.586	567.953	585.281	529.278	575.905	534.9	552.996	445.592	570.754	544.429	571.254	492.472	2340.33	2247.52	1234.33	958.97	1694.02	1042.21	1091.7	518.16	631.465	1493.93	740.735
M03F4.2b.5	WBGene00000066	act-4	29245	33543	32312	32864	32754	32664	36398	25134	26445	33235	35636	31415	16725	24820	5687	3502	5059	3815	6760	1778	2783	6418	1811	3300	513.586	567.953	585.281	529.278	575.905	534.9	552.996	445.592	570.754	544.429	571.254	492.472	2340.33	2247.52	1234.33	958.97	1694.02	1042.21	1091.7	518.16	631.465	1493.93	740.735
M03F4.2b.6	WBGene00000066	act-4	29245	33543	32312	32864	32754	32664	36398	25134	26445	33235	35636	31415	16725	24820	5687	3502	5059	3815	6760	1778	2783	6418	1811	3300	513.586	567.953	585.281	529.278	575.905	534.9	552.996	445.592	570.754	544.429	571.254	492.472	2340.33	2247.52	1234.33	958.97	1694.02	1042.21	1091.7	518.16	631.465	1493.93	740.735
M03F4.2c.1	WBGene00000066	act-4	30814	35279	34053	34559	34387	34160	38295	26486	27744	34935	37600	33316	16949	26575	5925	3643	5179	3989	6945	1861	2962	6650	1888	3444	541.14	597.347	616.817	556.577	604.618	559.398	581.818	469.562	598.79	572.277	602.737	522.272	2371.67	2406.44	1285.99	997.581	1734.21	1089.75	1121.57	542.348	672.08	1547.94	772.23
T25C8.2.1	WBGene00000067	act-5	12018	11528	14793	13258	12665	15249	14971	13975	10612	12502	15026	13803	1787	2258	1236	590	597	684	1386	379	620	680	345	617	211.054	195.193	267.952	213.522	222.686	249.715	227.455	247.758	229.035	204.798	240.871	216.38	250.055	204.468	268.266	161.563	199.908	186.861	223.83	110.451	140.678	158.285	141.112
T25C8.2.2	WBGene00000067	act-5	12018	11528	14793	13258	12665	15249	14971	13975	10612	12502	15026	13803	1787	2258	1236	590	597	684	1386	379	620	680	345	617	211.054	195.193	267.952	213.522	222.686	249.715	227.455	247.758	229.035	204.798	240.871	216.38	250.055	204.468	268.266	161.563	199.908	186.861	223.83	110.451	140.678	158.285	141.112
T25C8.2.3	WBGene00000067	act-5	12018	11528	14793	13258	12665	15249	14971	13975	10612	12502	15026	13803	1787	2258	1236	590	597	684	1386	379	620	680	345	617	211.054	195.193	267.952	213.522	222.686	249.715	227.455	247.758	229.035	204.798	240.871	216.38	250.055	204.468	268.266	161.563	199.908	186.861	223.83	110.451	140.678	158.285	141.112
C15B12.6a.1	WBGene00015787	actl-1	109	128	121	119	104	120	136	149	118	92	138	150	12	8	0	0	0	0	1	11	6	0	5	8	1.9142	2.16731	2.19172	1.91651	1.82861	1.9651	2.06625	2.64157	2.54676	1.50707	2.21217	2.35145	1.67916	0.724423	0	0	0	0	0.161493	3.20571	1.3614	0	2.0451
C15B12.6b.1	WBGene00015787	actl-1	109	128	121	119	104	120	136	149	118	92	138	150	12	8	0	0	0	0	1	11	6	0	5	8	1.9142	2.16731	2.19172	1.91651	1.82861	1.9651	2.06625	2.64157	2.54676	1.50707	2.21217	2.35145	1.67916	0.724423	0	0	0	0	0.161493	3.20571	1.3614	0	2.0451
F17C8.1.1	WBGene00000068	acy-1	561	586	538	509	548	512	655	467	488	649	724	617	43	37	13	32	8	34	27	24	8	15	4	3	9.852	9.92221	9.74502	8.1975	9.63535	8.38443	9.95145	8.27929	10.5324	10.6314	11.6059	9.67229	6.01699	3.35045	2.82157	8.76272	2.67883	9.2884	4.36032	6.99428	1.81521	3.49159	1.63608
C10F3.3.1	WBGene00000069	acy-2	60	71	70	73	52	50	77	80	50	57	83	62	4	0	0	0	6	11	0	0	0	0	0	5	1.05369	1.20218	1.26794	1.17567	0.914303	0.818792	1.16986	1.41829	1.07913	0.933728	1.33051	0.971932	0.55972	0	0	0	2.00912	3.00507	0	0	0	0	0
C44F1.5.1	WBGene00000070	acy-3	761	796	586	746	669	738	878	750	618	820	871	827	16	53	34	2	5	8	12	0	23	18	7	14	13.3643	13.4779	10.6145	12.0144	11.7629	12.0854	13.3395	13.2965	13.3381	13.4326	13.9623	12.9643	2.23888	4.7993	7.3795	0.54767	1.67427	2.18551	1.93792	0	5.21872	4.18991	2.86314
C44F1.5.2	WBGene00000070	acy-3	761	796	586	746	669	738	878	750	618	820	871	827	16	53	34	2	5	8	12	0	23	18	7	14	13.3643	13.4779	10.6145	12.0144	11.7629	12.0854	13.3395	13.2965	13.3381	13.4326	13.9623	12.9643	2.23888	4.7993	7.3795	0.54767	1.67427	2.18551	1.93792	0	5.21872	4.18991	2.86314
T01C2.1.1	WBGene00000071	acy-4	723	734	675	590	499	527	449	374	286	399	386	408	39	79	57	12	16	51	25	0	3	18	8	26	12.697	12.4282	12.2266	9.50202	8.77379	8.63006	6.82168	6.63052	6.17265	6.5361	6.18768	6.39594	5.45727	7.15367	12.3715	3.28602	5.35766	13.9326	4.03734	0	0.680702	4.18991	3.27216
F32A5.1a.1	WBGene00017967	ada-2	398	301	380	313	247	265	312	286	194	312	312	319	48	45	42	8	30	28	30	22	7	11	13	6	6.98947	5.09656	6.8831	5.0409	4.34294	4.3396	4.74023	5.0704	4.18704	5.11093	5.00144	5.00075	6.71663	4.07488	9.11585	2.19068	10.0456	7.64927	4.8448	6.41142	1.5883	2.5605	5.31726
F32A5.1b.1	WBGene00017967	ada-2	398	300	376	311	244	264	311	283	194	312	310	317	48	45	42	8	30	28	30	22	7	11	13	6	6.98947	5.07963	6.81065	5.00869	4.29019	4.32322	4.72504	5.01721	4.18704	5.11093	4.96938	4.9694	6.71663	4.07488	9.11585	2.19068	10.0456	7.64927	4.8448	6.41142	1.5883	2.5605	5.31726
VW02B12L.4.1	WBGene00012157	adbp-1	140	143	125	156	106	135	133	124	128	147	139	169	26	39	16	36	5	16	23	25	44	8	6	8	2.45861	2.42129	2.26418	2.5124	1.86377	2.21074	2.02068	2.19835	2.76258	2.40804	2.22821	2.6493	3.63818	3.53156	3.4727	9.85806	1.67427	4.37101	3.71435	7.28571	9.98363	1.86218	2.45412
F39C12.2a.1	WBGene00000072	add-1	674	681	628	590	583	544	574	476	414	600	631	587	49	41	41	12	8	29	8	31	18	12	36	17	11.8364	11.5308	11.3752	9.50202	10.2507	8.90845	8.72081	8.43885	8.93523	9.82871	10.1151	9.202	6.85656	3.71267	8.8988	3.28602	2.67883	7.92246	1.29195	9.03428	4.08421	2.79327	14.7247
F39C12.2b.1	WBGene00000072	add-1	714	705	646	594	598	547	595	486	421	625	657	611	52	42	46	12	12	44	8	31	18	12	41	22	12.5389	11.9371	11.7013	9.56644	10.5145	8.95758	9.03986	8.61613	9.08631	10.2382	10.5319	9.57824	7.27635	3.80322	9.98402	3.28602	4.01824	12.0203	1.29195	9.03428	4.08421	2.79327	16.7698
F39C12.2c.1	WBGene00000072	add-1	706	696	645	594	592	544	590	484	420	622	650	609	50	42	46	12	12	29	8	31	18	12	36	22	12.3984	11.7847	11.6832	9.56644	10.409	8.90845	8.9639	8.58068	9.06473	10.1891	10.4197	9.54688	6.99649	3.80322	9.98402	3.28602	4.01824	7.92246	1.29195	9.03428	4.08421	2.79327	14.7247
F39C12.2d.1	WBGene00000072	add-1	686	675	626	573	581	540	575	475	412	612	639	597	45	41	46	8	11	29	8	31	16	12	36	18	12.0472	11.4292	11.339	9.22823	10.2156	8.84295	8.736	8.42112	8.89207	10.0253	10.2433	9.35877	6.29685	3.71267	9.98402	2.19068	3.68339	7.92246	1.29195	9.03428	3.63041	2.79327	14.7247
F39C12.2e.1	WBGene00000072	add-1	680	676	629	580	579	530	576	462	406	603	623	589	49	41	41	12	8	29	8	31	18	12	36	17	11.9418	11.4461	11.3933	9.34097	10.1804	8.67919	8.75119	8.19065	8.76257	9.87786	9.98685	9.23336	6.85656	3.71267	8.8988	3.28602	2.67883	7.92246	1.29195	9.03428	4.08421	2.79327	14.7247
F57F5.4a.1	WBGene00000073	add-2	448	418	452	427	373	448	509	500	457	500	612	552	99	160	75	33	32	8	37	37	77	24	31	55	7.86755	7.07761	8.18727	6.87688	6.55837	7.33637	7.73326	8.86433	9.86329	8.1906	9.81051	8.65333	13.8531	14.4885	16.2783	9.03656	10.7153	2.18551	5.97526	10.7828	17.4714	5.58654	12.6796
F57F5.4a.2	WBGene00000073	add-2	448	418	452	427	373	448	509	500	457	500	612	552	99	160	75	33	32	8	37	37	77	24	31	55	7.86755	7.07761	8.18727	6.87688	6.55837	7.33637	7.73326	8.86433	9.86329	8.1906	9.81051	8.65333	13.8531	14.4885	16.2783	9.03656	10.7153	2.18551	5.97526	10.7828	17.4714	5.58654	12.6796
F57F5.4a.3	WBGene00000073	add-2	448	418	452	427	373	448	509	500	457	500	612	552	99	160	75	33	32	8	37	37	77	24	31	55	7.86755	7.07761	8.18727	6.87688	6.55837	7.33637	7.73326	8.86433	9.86329	8.1906	9.81051	8.65333	13.8531	14.4885	16.2783	9.03656	10.7153	2.18551	5.97526	10.7828	17.4714	5.58654	12.6796
F57F5.4b.1	WBGene00000073	add-2	327	311	364	342	304	378	411	406	387	386	525	449	97	150	73	22	26	8	30	37	77	24	31	55	5.74261	5.26588	6.59329	5.50795	5.34516	6.19007	6.24434	7.19784	8.3525	6.32314	8.41588	7.03867	13.5732	13.5829	15.8442	6.02437	8.7062	2.18551	4.8448	10.7828	17.4714	5.58654	12.6796
C04A11.4a.1	WBGene00000074	adm-2	383	330	365	338	291	351	404	336	252	324	355	391	48	58	40	13	12	44	22	18	17	7	7	50	6.72605	5.58759	6.6114	5.44353	5.11658	5.74792	6.13799	5.95683	5.43884	5.30751	5.69074	6.12944	6.71663	5.25206	8.68176	3.55986	4.01824	12.0203	3.55286	5.24571	3.85731	1.62941	2.86314
C04A11.4b.1	WBGene00000074	adm-2	383	329	364	337	289	347	402	335	251	323	354	389	48	58	40	13	12	44	22	18	17	7	7	50	6.72605	5.57066	6.59329	5.42742	5.08141	5.68241	6.1076	5.9391	5.41725	5.29112	5.67471	6.09809	6.71663	5.25206	8.68176	3.55986	4.01824	12.0203	3.55286	5.24571	3.85731	1.62941	2.86314
ZK154.7.1	WBGene00000075	adm-4	307	364	249	351	305	319	463	358	276	398	393	354	27	66	5	17	10	0	32	24	25	54	22	11	5.39138	6.16328	4.51024	5.65289	5.36274	5.22389	7.03438	6.34686	5.95682	6.51971	6.29989	5.54942	3.77811	5.97649	1.08522	4.6552	3.34854	0	5.16779	6.99428	5.67252	12.5697	8.99844
T21B4.4a.1	WBGene00011878	ador-1	12	12	21	11	15	13	9	19	11	10	11	26	2	0	13	0	0	0	0	0	0	2	0	0	0.210738	0.203185	0.380382	0.177156	0.263741	0.212886	0.136737	0.336845	0.23741	0.163812	0.176333	0.407584	0.27986	0	2.82157	0	0	0	0	0	0	0.465545	0
T21B4.4b.1	WBGene00011878	ador-1	12	12	21	11	15	13	9	19	11	10	11	26	2	0	13	0	0	0	0	0	0	2	0	0	0.210738	0.203185	0.380382	0.177156	0.263741	0.212886	0.136737	0.336845	0.23741	0.163812	0.176333	0.407584	0.27986	0	2.82157	0	0	0	0	0	0	0.465545	0
Y73E7A.9a.1	WBGene00044440	adpr-1	407	372	375	438	366	449	482	448	360	420	455	445	41	65	27	32	17	32	39	33	47	28	14	18	7.14753	6.29874	6.79253	7.05404	6.43529	7.35275	7.32305	7.94244	7.76977	6.8801	7.29376	6.97597	5.73713	5.88593	5.86019	8.76272	5.69251	8.74202	6.29824	9.61714	10.6643	6.51763	5.72628
Y73E7A.9b.1	WBGene00044440	adpr-1	261	222	231	275	234	254	288	269	220	258	295	290	28	33	16	0	6	11	20	18	21	25	8	3	4.58355	3.75892	4.1842	4.42891	4.11436	4.15946	4.3756	4.76901	4.74819	4.22635	4.72892	4.54613	3.91804	2.98824	3.4727	0	2.00912	3.00507	3.22987	5.24571	4.76491	5.81932	3.27216
Y73E7A.9c.1	WBGene00044440	adpr-1	227	193	203	231	207	222	252	226	191	228	252	255	24	33	11	0	6	11	20	18	18	23	8	3	3.98646	3.26789	3.67703	3.72028	3.63963	3.63544	3.82865	4.00668	4.12229	3.73491	4.03962	3.99746	3.35832	2.98824	2.38748	0	2.00912	3.00507	3.22987	5.24571	4.08421	5.35377	3.27216
Y73E7A.9d.1	WBGene00044440	adpr-1	156	133	126	139	141	145	162	148	119	151	171	168	18	23	9	0	6	1	13	0	18	17	8	2	2.73959	2.25197	2.28229	2.23861	2.47917	2.3745	2.46127	2.62384	2.56834	2.47356	2.74117	2.63362	2.51874	2.08272	1.9534	0	2.00912	0.273188	2.09941	0	4.08421	3.95713	3.27216
H15N14.1c.1	WBGene00000079	adr-1	598	619	523	513	457	546	551	521	392	602	567	626	51	72	20	26	25	17	31	22	11	30	18	10	10.5018	10.481	9.47332	8.26192	8.03532	8.94121	8.37137	9.23664	8.46041	9.86148	9.08915	9.81338	7.13642	6.5198	4.34088	7.11971	8.37134	4.6442	5.0063	6.41142	2.49591	6.98318	7.36236
H15N14.1d.1	WBGene00000079	adr-1	584	611	506	501	450	526	539	512	383	590	552	604	43	70	16	26	17	17	31	22	11	30	18	9	10.2559	10.3455	9.16539	8.06866	7.91224	8.61369	8.18905	9.07708	8.26617	9.6649	8.8487	9.4685	6.01699	6.3387	3.4727	7.11971	5.69251	4.6442	5.0063	6.41142	2.49591	6.98318	7.36236
H15N14.1e.1	WBGene00000079	adr-1	584	611	506	501	450	526	539	512	383	590	552	604	43	70	16	26	17	17	31	22	11	30	18	9	10.2559	10.3455	9.16539	8.06866	7.91224	8.61369	8.18905	9.07708	8.26617	9.6649	8.8487	9.4685	6.01699	6.3387	3.4727	7.11971	5.69251	4.6442	5.0063	6.41142	2.49591	6.98318	7.36236
H15N14.1f.1	WBGene00000079	adr-1	112	109	98	77	76	102	88	109	75	121	96	111	12	6	6	0	4	0	11	0	4	7	3	0	1.96689	1.8456	1.77512	1.24009	1.33629	1.67034	1.33699	1.93242	1.6187	1.98212	1.5389	1.74007	1.67916	0.543317	1.30226	0	1.33941	0	1.77643	0	0.907603	1.62941	1.22706
H15N14.1g.1	WBGene00000079	adr-1	154	159	140	120	105	158	131	144	111	155	148	161	16	9	10	0	7	0	11	0	4	7	3	1	2.70447	2.6922	2.53588	1.93261	1.84619	2.58738	1.99029	2.55293	2.39568	2.53908	2.37248	2.52389	2.23888	0.814975	2.17044	0	2.34398	0	1.77643	0	0.907603	1.62941	1.22706
T20H4.4.1	WBGene00000080	adr-2	228	262	221	237	173	258	283	280	193	222	267	308	25	19	20	13	4	34	17	34	9	12	28	20	4.00402	4.43621	4.00307	3.81691	3.04182	4.22497	4.29963	4.96403	4.16546	3.63662	4.28008	4.82831	3.49825	1.7205	4.34088	3.55986	1.33941	9.2884	2.74539	9.90856	2.04211	2.79327	11.4526
T20H4.4.2	WBGene00000080	adr-2	228	262	221	237	173	258	283	280	193	222	267	308	25	19	20	13	4	34	17	34	9	12	28	20	4.00402	4.43621	4.00307	3.81691	3.04182	4.22497	4.29963	4.96403	4.16546	3.63662	4.28008	4.82831	3.49825	1.7205	4.34088	3.55986	1.33941	9.2884	2.74539	9.90856	2.04211	2.79327	11.4526
Y50D7A.7.1	WBGene00000081	ads-1	4753	4989	5932	5737	5224	6248	7202	7097	4724	5865	5932	6970	682	1171	403	285	218	245	738	346	607	412	239	279	83.4698	84.4742	107.449	92.395	91.8523	102.316	109.42	125.82	101.957	96.0757	95.0915	109.264	95.4322	106.037	87.4687	78.043	72.9981	66.9311	119.182	100.834	137.729	95.9023	97.7558
R06C7.5a.1	WBGene00011064	adsl-1	867	941	808	1162	984	1129	1601	1653	1276	1214	1348	1292	151	254	128	99	66	90	165	84	113	145	53	86	15.2258	15.9331	14.6356	18.7141	17.3014	18.4883	24.3241	29.3055	27.5395	19.8868	21.6088	20.2538	21.1294	23.0004	27.7816	27.1097	22.1003	24.5869	26.6464	24.48	25.6398	33.752	21.6781
R06C7.5a.2	WBGene00011064	adsl-1	867	941	808	1162	984	1129	1601	1653	1276	1214	1348	1292	151	254	128	99	66	90	165	84	113	145	53	86	15.2258	15.9331	14.6356	18.7141	17.3014	18.4883	24.3241	29.3055	27.5395	19.8868	21.6088	20.2538	21.1294	23.0004	27.7816	27.1097	22.1003	24.5869	26.6464	24.48	25.6398	33.752	21.6781
R06C7.5b.1	WBGene00011064	adsl-1	677	733	622	908	772	909	1247	1307	993	953	1061	1038	119	207	84	62	57	68	95	38	94	85	34	70	11.8891	12.4112	11.2666	14.6234	13.5739	14.8856	18.9457	23.1714	21.4316	15.6113	17.0081	16.272	16.6517	18.7444	18.2317	16.9778	19.0867	18.5768	15.3419	11.0743	21.3287	19.7857	13.9067
C37H5.6a.1	WBGene00016509	adss-1	3487	3784	4170	3978	3548	4341	5081	4591	3836	3946	4170	4808	781	1108	413	297	356	300	544	360	375	348	408	347	61.2369	64.071	75.533	64.0661	62.3836	71.0875	77.1959	81.3923	82.7912	64.6402	66.8462	75.3718	109.285	100.333	89.6392	81.329	119.208	81.9565	87.8524	104.914	85.0878	81.0049	166.88
C37H5.6b.1	WBGene00016509	adss-1	3475	3764	4158	3971	3535	4326	5067	4577	3818	3930	4145	4783	781	1108	410	297	356	300	544	360	375	348	408	346	61.0262	63.7324	75.3156	63.9534	62.155	70.8419	76.9832	81.1441	82.4027	64.3781	66.4454	74.9799	109.285	100.333	88.988	81.329	119.208	81.9565	87.8524	104.914	85.0878	81.0049	166.88
C02B4.1.1	WBGene00000082	adt-1	104	123	67	106	97	69	182	144	104	98	131	99	3	10	5	0	0	7	0	0	6	4	3	0	1.8264	2.08265	1.2136	1.70714	1.70553	1.12993	2.76513	2.55293	2.2446	1.60536	2.09996	1.55196	0.41979	0.905528	1.08522	0	0	1.91232	0	0	1.3614	0.93109	1.22706
F08C6.1a.1	WBGene00000083	adt-2	2959	3348	2861	2947	2885	2701	3203	2504	2380	3159	3193	2964	673	1467	519	417	418	418	555	222	255	495	178	331	51.9645	56.6886	51.8225	47.4618	50.7262	44.2311	48.6633	44.3926	51.3668	51.7482	51.1846	46.4646	94.1728	132.841	112.646	114.189	139.969	114.193	89.6288	64.6971	57.8597	115.222	72.8056
F08C6.1a.2	WBGene00000083	adt-2	2959	3348	2861	2947	2885	2701	3203	2504	2380	3159	3193	2964	673	1467	519	417	418	418	555	222	255	495	178	331	51.9645	56.6886	51.8225	47.4618	50.7262	44.2311	48.6633	44.3926	51.3668	51.7482	51.1846	46.4646	94.1728	132.841	112.646	114.189	139.969	114.193	89.6288	64.6971	57.8597	115.222	72.8056
F08C6.1b.1	WBGene00000083	adt-2	424	539	402	385	446	361	496	390	352	474	515	401	121	249	50	65	70	32	91	0	55	91	46	32	7.44607	9.1264	7.2816	6.20047	7.84191	5.91168	7.53575	6.91418	7.59711	7.76468	8.25558	6.28621	16.9315	22.5477	10.8522	17.7993	23.4398	8.74202	14.6959	0	12.4795	21.1823	18.8149
F08C6.1b.2	WBGene00000083	adt-2	424	539	402	385	446	361	496	390	352	474	515	401	121	249	50	65	70	32	91	0	55	91	46	32	7.44607	9.1264	7.2816	6.20047	7.84191	5.91168	7.53575	6.91418	7.59711	7.76468	8.25558	6.28621	16.9315	22.5477	10.8522	17.7993	23.4398	8.74202	14.6959	0	12.4795	21.1823	18.8149
F08C6.1c.1	WBGene00000083	adt-2	2884	3216	2786	2872	2802	2623	3099	2417	2302	3068	3066	2878	627	1343	510	391	402	405	513	222	242	462	172	321	50.6473	54.4536	50.464	46.2539	49.2669	42.9538	47.0833	42.8502	49.6833	50.2575	49.1488	45.1165	87.736	121.612	110.692	107.07	134.611	110.641	82.8461	64.6971	54.91	107.541	70.3514
F08C6.1c.2	WBGene00000083	adt-2	2884	3216	2786	2872	2802	2623	3099	2417	2302	3068	3066	2878	627	1343	510	391	402	405	513	222	242	462	172	321	50.6473	54.4536	50.464	46.2539	49.2669	42.9538	47.0833	42.8502	49.6833	50.2575	49.1488	45.1165	87.736	121.612	110.692	107.07	134.611	110.641	82.8461	64.6971	54.91	107.541	70.3514
T19D2.1.1	WBGene00020567	adt-3	100	156	91	165	122	120	236	137	218	180	159	173	18	18	14	0	27	32	17	12	22	15	3	2	1.75615	2.64141	1.64832	2.65734	2.1451	1.9651	3.58556	2.42883	4.70503	2.94861	2.54881	2.712	2.51874	1.62995	3.03862	0	9.04105	8.74202	2.74539	3.49714	4.99182	3.49159	1.22706
D2030.10a.1	WBGene00000084	aex-1	523	503	508	367	324	379	442	428	316	410	466	318	14	27	25	15	0	0	13	21	5	7	21	3	9.18466	8.51684	9.20162	5.91058	5.69681	6.20644	6.71533	7.58787	6.82013	6.71629	7.4701	4.98507	1.95902	2.44493	5.4261	4.10753	0	0	2.09941	6.12	1.1345	1.62941	8.58942
D2030.10a.2	WBGene00000084	aex-1	523	503	508	367	324	379	442	428	316	410	466	318	14	27	25	15	0	0	13	21	5	7	21	3	9.18466	8.51684	9.20162	5.91058	5.69681	6.20644	6.71533	7.58787	6.82013	6.71629	7.4701	4.98507	1.95902	2.44493	5.4261	4.10753	0	0	2.09941	6.12	1.1345	1.62941	8.58942
D2030.10b.1	WBGene00000084	aex-1	477	473	471	337	306	352	418	402	296	389	435	293	10	24	25	15	0	0	13	21	5	7	20	2	8.37683	8.00888	8.53142	5.42742	5.38032	5.76429	6.35069	7.12692	6.38848	6.37228	6.97316	4.59316	1.3993	2.17327	5.4261	4.10753	0	0	2.09941	6.12	1.1345	1.62941	8.1804
T14B1.2.1	WBGene00000085	aex-2	30	44	36	21	34	22	32	30	19	32	30	27	13	19	4	0	0	0	12	0	0	3	0	3	0.526845	0.745012	0.652083	0.338207	0.597813	0.360268	0.486177	0.53186	0.410071	0.524198	0.480908	0.423261	1.81909	1.7205	0.868176	0	0	0	1.93792	0	0	0.698318	0
C02H7.3a.1	WBGene00000086	aex-3	454	477	503	307	320	357	477	420	323	418	438	439	14	52	0	0	9	12	18	7	10	6	9	15	7.97292	8.07661	9.11105	4.94427	5.62648	5.84617	7.24708	7.44604	6.97121	6.84734	7.02125	6.88191	1.95902	4.70875	0	0	3.01368	3.27826	2.90688	2.04	2.26901	1.39664	3.68118
C02H7.3b.1	WBGene00000086	aex-3	457	476	498	308	320	357	473	422	327	420	437	438	14	52	0	0	9	12	10	7	10	6	9	15	8.0256	8.05968	9.02049	4.96037	5.62648	5.84617	7.18631	7.4815	7.05754	6.8801	7.00522	6.86623	1.95902	4.70875	0	0	3.01368	3.27826	1.61493	2.04	2.26901	1.39664	3.68118
T14G12.2.1	WBGene00006454	aex-4	412	390	469	290	237	282	252	294	227	291	320	332	44	64	54	11	12	22	10	15	12	19	0	37	7.23533	6.60352	8.4952	4.67048	4.16711	4.61799	3.82865	5.21223	4.89927	4.76693	5.12968	5.20454	6.15692	5.79538	11.7204	3.01219	4.01824	6.01014	1.61493	4.37143	2.72281	4.42268	0
F32A7.6.1	WBGene00000088	aex-5	1126	936	1136	868	803	915	924	812	696	893	955	812	64	128	28	4	17	23	45	27	42	49	19	49	19.7742	15.8484	20.5769	13.9792	14.1189	14.9839	14.0384	14.3957	15.0216	14.6284	15.3089	12.7292	8.95551	11.5908	6.07723	1.09534	5.69251	6.28333	7.2672	7.86857	9.52983	11.4059	7.77138
Y87G2A.4.1	WBGene00000089	aex-6	172	208	193	128	146	167	143	156	118	179	180	187	40	53	36	16	1	0	14	37	12	24	8	22	3.02058	3.52188	3.49589	2.06145	2.56708	2.73476	2.17261	2.76567	2.54676	2.93223	2.88545	2.93147	5.5972	4.7993	7.81358	4.38136	0.334854	0	2.26091	10.7828	2.72281	5.58654	3.27216
C25B8.5a.1	WBGene00016089	aexr-1	11	3	10	15	10	9	16	12	10	8	8	6	0	0	0	10	0	0	0	0	0	3	1	0	0.193176	0.0507963	0.181134	0.241577	0.175827	0.147383	0.243089	0.212744	0.215827	0.13105	0.128242	0.094058	0	0	0	2.73835	0	0	0	0	0	0.698318	0.40902
C25B8.5b.1	WBGene00016089	aexr-1	11	3	10	15	10	9	16	12	10	8	8	6	0	0	0	10	0	0	0	0	0	3	1	0	0.193176	0.0507963	0.181134	0.241577	0.175827	0.147383	0.243089	0.212744	0.215827	0.13105	0.128242	0.094058	0	0	0	2.73835	0	0	0	0	0	0.698318	0.40902
C25B8.7.1	WBGene00016090	aexr-2	2	3	3	1	1	5	1	0	4	2	6	4	1	0	0	0	0	0	0	0	0	0	0	0	0.035123	0.0507963	0.0543403	0.0161051	0.0175827	0.0818792	0.015193	0	0.0863307	0.0327624	0.0961815	0.0627053	0.13993	0	0	0	0	0	0	0	0	0	0
C48C5.3.1	WBGene00016748	aexr-3	30	24	26	32	17	25	28	19	20	27	31	33	1	6	4	0	0	0	0	0	0	2	0	1	0.526845	0.40637	0.470949	0.515364	0.298907	0.409396	0.425405	0.336845	0.431654	0.442292	0.496938	0.517319	0.13993	0.543317	0.868176	0	0	0	0	0	0	0.465545	0
W03F11.6a.1	WBGene00021009	afd-1	1928	1892	1607	1656	1630	1830	1839	1650	1480	1574	1727	1726	82	184	135	125	34	108	134	57	93	77	21	73	33.8586	32.0355	29.1083	26.6701	28.6599	29.9678	27.94	29.2523	31.9424	25.784	27.6842	27.0573	11.4743	16.6617	29.3009	34.2294	11.385	29.5043	21.6401	16.6114	21.1018	17.9235	8.58942
W03F11.6b.1	WBGene00021009	afd-1	782	691	663	599	659	757	763	665	554	676	643	677	40	56	76	44	21	39	62	46	67	46	4	33	13.7331	11.7001	12.0092	9.64696	11.587	12.3965	11.5923	11.7896	11.9568	11.0737	10.3075	10.6129	5.5972	5.07096	16.4953	12.0487	7.03193	10.6543	10.0126	13.4057	15.2023	10.7075	1.63608
W03F11.6c.1	WBGene00021009	afd-1	1928	1892	1607	1656	1630	1830	1839	1650	1480	1574	1727	1726	82	179	135	125	34	108	134	57	90	77	21	73	33.8586	32.0355	29.1083	26.6701	28.6599	29.9678	27.94	29.2523	31.9424	25.784	27.6842	27.0573	11.4743	16.209	29.3009	34.2294	11.385	29.5043	21.6401	16.6114	20.4211	17.9235	8.58942
W03F11.6d.1	WBGene00021009	afd-1	1882	1852	1566	1627	1592	1793	1804	1604	1453	1538	1688	1690	75	179	118	125	28	108	134	57	93	70	21	69	33.0507	31.3582	28.3656	26.203	27.9917	29.3619	27.4083	28.4368	31.3596	25.1943	27.0591	26.493	10.4947	16.209	25.6112	34.2294	9.3759	29.5043	21.6401	16.6114	21.1018	16.2941	8.58942
W03F11.6e.1	WBGene00021009	afd-1	1441	1374	1214	1225	1225	1372	1400	1263	1082	1241	1321	1291	59	98	102	89	25	58	105	46	79	64	6	55	25.3061	23.2647	21.9897	19.7288	21.5389	22.4676	21.2703	22.3913	23.3525	20.3291	21.176	20.2381	8.25586	8.87418	22.1385	24.3713	8.37134	15.8449	16.9568	13.4057	17.9252	14.8974	2.45412
W03F11.6f.1	WBGene00021009	afd-1	1882	1852	1566	1627	1592	1793	1804	1604	1453	1538	1688	1690	75	174	118	125	28	108	134	57	90	70	21	69	33.0507	31.3582	28.3656	26.203	27.9917	29.3619	27.4083	28.4368	31.3596	25.1943	27.0591	26.493	10.4947	15.7562	25.6112	34.2294	9.3759	29.5043	21.6401	16.6114	20.4211	16.2941	8.58942
W03F11.6g.1	WBGene00021009	afd-1	1743	1702	1469	1512	1500	1665	1669	1504	1303	1462	1549	1553	63	153	117	109	32	96	124	57	80	71	11	71	30.6097	28.8184	26.6086	24.3509	26.3741	27.2658	25.3572	26.6639	28.1222	23.9493	24.8309	24.3453	8.81558	13.8546	25.3941	29.848	10.7153	26.2261	20.0252	16.6114	18.1521	16.5269	4.49922
W03F11.6h.1	WBGene00021009	afd-1	1697	1662	1428	1483	1462	1628	1634	1458	1276	1426	1510	1517	56	148	100	109	26	96	124	57	80	64	11	67	29.8019	28.1411	25.866	23.8839	25.706	26.6599	24.8254	25.8484	27.5395	23.3596	24.2057	23.781	7.83607	13.4018	21.7044	29.848	8.7062	26.2261	20.0252	16.6114	18.1521	14.8974	4.49922
W03F11.6i.1	WBGene00021009	afd-1	1679	1639	1418	1465	1451	1598	1616	1451	1261	1408	1485	1496	63	145	117	109	32	84	124	46	80	71	11	71	29.4857	27.7517	25.6848	23.594	25.5126	26.1686	24.552	25.7243	27.2158	23.0647	23.8049	23.4518	8.81558	13.1302	25.3941	29.848	10.7153	22.9478	20.0252	13.4057	18.1521	16.5269	4.49922
W03F11.6j.1	WBGene00021009	afd-1	1633	1599	1377	1436	1413	1561	1581	1405	1234	1372	1446	1460	56	140	100	109	26	84	124	46	80	64	11	67	28.6779	27.0744	24.9422	23.1269	24.8444	25.5627	24.0202	24.9088	26.633	22.475	23.1797	22.8874	7.83607	12.6774	21.7044	29.848	8.7062	22.9478	20.0252	13.4057	18.1521	14.8974	4.49922
W03F11.6k.1	WBGene00021009	afd-1	1528	1487	1291	1338	1316	1456	1489	1323	1148	1314	1384	1363	62	125	117	109	32	84	119	46	80	71	11	71	26.834	25.178	23.3844	21.5486	23.1389	23.8432	22.6224	23.455	24.7769	21.5249	22.1859	21.3668	8.67565	11.3191	25.3941	29.848	10.7153	22.9478	19.2177	13.4057	18.1521	16.5269	4.49922
W03F11.6k.2	WBGene00021009	afd-1	1528	1487	1291	1338	1316	1456	1489	1323	1148	1314	1384	1363	62	125	117	109	32	84	119	46	80	71	11	71	26.834	25.178	23.3844	21.5486	23.1389	23.8432	22.6224	23.455	24.7769	21.5249	22.1859	21.3668	8.67565	11.3191	25.3941	29.848	10.7153	22.9478	19.2177	13.4057	18.1521	16.5269	4.49922
W03F11.6l.1	WBGene00021009	afd-1	1482	1447	1250	1309	1278	1419	1454	1277	1121	1278	1345	1327	55	120	100	109	26	84	119	46	80	64	11	67	26.0261	24.5007	22.6418	21.0816	22.4708	23.2373	22.0907	22.6395	24.1942	20.9352	21.5607	20.8025	7.69614	10.8663	21.7044	29.848	8.7062	22.9478	19.2177	13.4057	18.1521	14.8974	4.49922
W03F11.6l.2	WBGene00021009	afd-1	1482	1447	1250	1309	1278	1419	1454	1277	1121	1278	1345	1327	55	120	100	109	26	84	119	46	80	64	11	67	26.0261	24.5007	22.6418	21.0816	22.4708	23.2373	22.0907	22.6395	24.1942	20.9352	21.5607	20.8025	7.69614	10.8663	21.7044	29.848	8.7062	22.9478	19.2177	13.4057	18.1521	14.8974	4.49922
W03F11.6m.1	WBGene00021009	afd-1	1420	1357	1191	1215	1207	1340	1377	1227	1050	1220	1279	1258	58	98	102	89	25	58	105	46	79	64	6	55	24.9373	22.9769	21.5731	19.5677	21.2224	21.9436	20.9208	21.7531	22.6618	19.9851	20.5027	19.7208	8.11593	8.87418	22.1385	24.3713	8.37134	15.8449	16.9568	13.4057	17.9252	14.8974	2.45412
W03F11.6m.2	WBGene00021009	afd-1	1420	1357	1191	1215	1207	1340	1377	1227	1050	1220	1279	1258	58	98	102	89	25	58	105	46	79	64	6	55	24.9373	22.9769	21.5731	19.5677	21.2224	21.9436	20.9208	21.7531	22.6618	19.9851	20.5027	19.7208	8.11593	8.87418	22.1385	24.3713	8.37134	15.8449	16.9568	13.4057	17.9252	14.8974	2.45412
W03F11.6n.1	WBGene00021009	afd-1	1374	1317	1150	1186	1169	1303	1342	1181	1023	1184	1240	1222	51	93	85	89	19	58	105	46	79	57	6	51	24.1295	22.2996	20.8304	19.1007	20.5542	21.3377	20.3891	20.9376	22.0791	19.3953	19.8775	19.1565	7.13642	8.42141	18.4487	24.3713	6.36222	15.8449	16.9568	13.4057	17.9252	13.268	2.45412
W03F11.6o.1	WBGene00021009	afd-1	1762	1726	1494	1542	1513	1692	1692	1522	1333	1475	1588	1587	63	159	117	109	32	96	124	57	80	71	11	71	30.9433	29.2248	27.0615	24.8341	26.6027	27.7079	25.7066	26.983	28.7697	24.1623	25.456	24.8783	8.81558	14.3979	25.3941	29.848	10.7153	26.2261	20.0252	16.6114	18.1521	16.5269	4.49922
C44B7.3.1	WBGene00016625	aff-1	28	39	35	42	44	41	64	62	36	53	53	47	8	6	0	27	0	0	0	17	8	0	0	0	0.491722	0.660352	0.63397	0.676415	0.773641	0.671409	0.972355	1.09918	0.776977	0.868203	0.849603	0.736787	1.11944	0.543317	0	7.39355	0	0	0	4.95428	1.81521	0	0
D2024.2.1	WBGene00017051	afmd-1	110	120	107	153	134	145	138	156	139	161	156	147	58	58	31	26	24	18	72	11	33	48	13	15	1.93176	2.03185	1.93814	2.46408	2.35609	2.3745	2.09664	2.76567	2.99999	2.63737	2.50072	2.30442	8.11593	5.25206	6.72836	7.11971	8.03649	4.91739	11.6275	3.20571	7.48772	11.1731	5.31726
Y45F10A.3a.1	WBGene00012866	afmd-2	254	270	286	256	232	254	265	327	240	268	317	304	66	90	79	68	39	41	70	13	34	45	36	45	4.46062	4.57167	5.18044	4.12291	4.0792	4.15946	4.02616	5.79727	5.17984	4.39016	5.08159	4.7656	9.23537	8.14975	17.1465	18.6208	13.0593	11.2007	11.3045	3.78857	7.71462	10.4748	14.7247
Y45F10A.3b.1	WBGene00012866	afmd-2	243	247	270	241	227	230	256	305	233	259	293	290	59	86	62	68	34	37	70	13	33	45	36	45	4.26744	4.18223	4.89063	3.88133	3.99128	3.76644	3.88942	5.40724	5.02877	4.24273	4.69686	4.54613	8.25586	7.78754	13.4567	18.6208	11.385	10.108	11.3045	3.78857	7.48772	10.4748	14.7247
Y45F10A.3c.1	WBGene00012866	afmd-2	75	77	87	87	68	64	86	105	95	68	118	90	4	2	13	28	0	10	0	7	3	8	11	4	1.31711	1.30377	1.57587	1.40114	1.19563	1.04805	1.3066	1.86151	2.05036	1.11392	1.89157	1.41087	0.55972	0.181106	2.82157	7.66738	0	2.73188	0	2.04	0.680702	1.86218	4.49922
B0334.8a.1	WBGene00000090	age-1	413	318	323	265	257	307	364	347	275	301	340	375	17	48	21	13	2	0	7	45	34	16	10	3	7.2529	5.38441	5.85064	4.26785	4.51877	5.02738	5.53027	6.15185	5.93524	4.93074	5.45029	5.87862	2.37881	4.34654	4.55792	3.55986	0.669707	0	1.13045	13.1143	7.71462	3.72436	4.0902
B0334.8b.1	WBGene00000090	age-1	50	29	25	22	17	17	37	19	17	20	25	27	0	4	0	0	0	0	0	0	1	0	0	0	0.878075	0.491031	0.452836	0.354312	0.298907	0.278389	0.562143	0.336845	0.366906	0.327624	0.400756	0.423261	0	0.362211	0	0	0	0	0	0	0.226901	0	0
Y6B3A.1a.1	WBGene00012386	agef-1	2202	2021	1749	2084	2027	2024	2163	1823	1545	1884	2135	1959	134	232	78	49	45	61	104	51	78	67	32	62	38.6704	34.2198	31.6804	33.5631	35.6402	33.1447	32.8626	32.3194	33.3453	30.8622	34.2246	30.7099	18.7506	21.0083	16.9294	13.4179	15.0684	16.6645	16.7953	14.8628	17.6983	15.5958	13.0886
Y6B3A.1b.1	WBGene00012386	agef-1	748	713	606	757	709	759	786	669	596	710	815	724	32	52	15	5	9	11	32	0	16	3	10	7	13.136	12.0726	10.9767	12.1916	12.4662	12.4293	11.9417	11.8605	12.8633	11.6306	13.0647	11.3497	4.47776	4.70875	3.25566	1.36918	3.01368	3.00507	5.16779	0	3.63041	0.698318	4.0902
R06A4.8.1	WBGene00011050	agl-1	2656	3095	2741	2972	2489	3140	3586	3250	2822	2788	3239	3301	725	1300	559	380	387	491	740	441	485	393	257	405	46.6433	52.4048	49.6489	47.8644	43.7635	51.4201	54.4823	57.6182	60.9063	45.6708	51.922	51.7476	101.449	117.719	121.328	104.057	129.588	134.135	119.505	128.52	110.047	91.4796	105.118
R06A4.8.2	WBGene00011050	agl-1	2656	3095	2741	2972	2489	3140	3586	3250	2822	2788	3239	3301	725	1300	559	380	387	491	740	441	485	393	257	405	46.6433	52.4048	49.6489	47.8644	43.7635	51.4201	54.4823	57.6182	60.9063	45.6708	51.922	51.7476	101.449	117.719	121.328	104.057	129.588	134.135	119.505	128.52	110.047	91.4796	105.118
BE10.2.1	WBGene00007210	agmo-1	5	1	4	3	0	2	5	11	5	10	3	8	2	0	0	0	0	0	0	0	0	0	0	0	0.0878075	0.0169321	0.0724537	0.0483153	0	0.0327517	0.0759652	0.195015	0.107913	0.163812	0.0480908	0.125411	0.27986	0	0	0	0	0	0	0	0	0	0
F41G3.12.1	WBGene00018304	agr-1	147	171	137	139	142	142	182	133	134	178	220	178	2	13	10	11	16	6	29	0	1	19	5	6	2.58154	2.89539	2.48154	2.23861	2.49675	2.32537	2.76513	2.35791	2.89208	2.91585	3.52666	2.79039	0.27986	1.17719	2.17044	3.01219	5.35766	1.63913	4.68331	0	0.226901	4.42268	2.0451
F32A6.4a.1	WBGene00000092	ags-3	453	577	460	489	524	491	501	465	379	434	423	481	50	96	33	0	30	10	34	34	34	15	18	39	7.95536	9.76982	8.33218	7.8754	9.21336	8.04053	7.61172	8.24383	8.17984	7.10944	6.7808	7.54031	6.99649	8.69307	7.16245	0	10.0456	2.73188	5.49078	9.90856	7.71462	3.49159	7.36236
F32A6.4a.2	WBGene00000092	ags-3	453	577	460	489	524	491	501	465	379	434	423	481	50	96	33	0	30	10	34	34	34	15	18	39	7.95536	9.76982	8.33218	7.8754	9.21336	8.04053	7.61172	8.24383	8.17984	7.10944	6.7808	7.54031	6.99649	8.69307	7.16245	0	10.0456	2.73188	5.49078	9.90856	7.71462	3.49159	7.36236
F32A6.4d.1	WBGene00000092	ags-3	341	442	364	347	362	357	379	329	293	334	309	355	43	76	33	0	16	0	23	21	25	10	16	29	5.98847	7.48399	6.59329	5.58847	6.36496	5.84617	5.75816	5.83273	6.32373	5.47132	4.95335	5.5651	6.01699	6.88202	7.16245	0	5.35766	0	3.71435	6.12	5.67252	2.32773	6.54432
F32A6.4e.1	WBGene00000092	ags-3	329	419	345	324	338	334	355	312	278	312	293	336	43	75	33	0	16	0	23	21	25	10	16	25	5.77773	7.09455	6.24913	5.21806	5.94297	5.46953	5.39353	5.53134	5.99999	5.11093	4.69686	5.26725	6.01699	6.79146	7.16245	0	5.35766	0	3.71435	6.12	5.67252	2.32773	6.54432
F32A6.4f.1	WBGene00000092	ags-3	184	265	197	201	206	189	209	183	154	197	172	183	33	54	32	0	11	0	13	21	19	4	6	18	3.23131	4.487	3.56835	3.23713	3.62205	3.09503	3.17535	3.24435	3.32373	3.22709	2.7572	2.86877	4.61769	4.88985	6.94541	0	3.68339	0	2.09941	6.12	4.31111	0.93109	2.45412
F32A6.4g.1	WBGene00000092	ags-3	154	208	155	161	166	150	181	140	119	162	140	146	23	46	26	0	2	0	0	21	16	4	3	18	2.70447	3.52188	2.80758	2.59292	2.91874	2.45638	2.74994	2.48201	2.56834	2.65375	2.24424	2.28874	3.21839	4.16543	5.64314	0	0.669707	0	0	6.12	3.63041	0.93109	1.22706
F32A6.4g.2	WBGene00000092	ags-3	154	208	155	161	166	150	181	140	119	162	140	146	23	46	26	0	2	0	0	21	16	4	3	18	2.70447	3.52188	2.80758	2.59292	2.91874	2.45638	2.74994	2.48201	2.56834	2.65375	2.24424	2.28874	3.21839	4.16543	5.64314	0	0.669707	0	0	6.12	3.63041	0.93109	1.22706
F32A6.4g.3	WBGene00000092	ags-3	154	208	155	161	166	150	181	140	119	162	140	146	23	46	26	0	2	0	0	21	16	4	3	18	2.70447	3.52188	2.80758	2.59292	2.91874	2.45638	2.74994	2.48201	2.56834	2.65375	2.24424	2.28874	3.21839	4.16543	5.64314	0	0.669707	0	0	6.12	3.63041	0.93109	1.22706
Y62E10A.5a.1	WBGene00000093	agt-1	58	57	58	88	77	91	97	118	98	73	111	92	20	34	8	13	0	6	7	0	7	3	6	8	1.01857	0.965129	1.05058	1.41725	1.35387	1.4902	1.47373	2.09198	2.1151	1.19583	1.77936	1.44222	2.7986	3.0788	1.73635	3.55986	0	1.63913	1.13045	0	1.5883	0.698318	2.45412
Y62E10A.5a.2	WBGene00000093	agt-1	58	57	58	88	77	91	97	118	98	73	111	92	20	34	8	13	0	6	7	0	7	3	6	8	1.01857	0.965129	1.05058	1.41725	1.35387	1.4902	1.47373	2.09198	2.1151	1.19583	1.77936	1.44222	2.7986	3.0788	1.73635	3.55986	0	1.63913	1.13045	0	1.5883	0.698318	2.45412
Y62E10A.5b.1	WBGene00000093	agt-1	53	53	57	80	69	83	91	105	94	67	102	88	20	34	8	13	0	6	7	0	7	3	6	0	0.930759	0.897401	1.03247	1.28841	1.21321	1.35919	1.38257	1.86151	2.02877	1.09754	1.63509	1.37952	2.7986	3.0788	1.73635	3.55986	0	1.63913	1.13045	0	1.5883	0.698318	2.45412
F09E5.13.1	WBGene00000094	agt-2	86	71	56	60	53	35	57	57	38	76	56	60	0	12	0	0	0	0	0	0	0	0	0	5	1.51029	1.20218	1.01435	0.966307	0.931886	0.573154	0.866004	1.01053	0.820142	1.24497	0.897694	0.94058	0	1.08663	0	0	0	0	0	0	0	0	0
T14D7.1.1	WBGene00011767	agxt-1	709	862	772	913	785	874	1172	1074	828	949	1075	1047	332	588	250	152	182	264	365	286	262	259	141	273	12.4511	14.5955	13.9836	14.704	13.8025	14.3125	17.8063	19.0406	17.8705	15.5458	17.2325	16.4131	46.4567	53.2451	54.261	41.6229	60.9434	72.1217	58.9451	83.3485	59.448	60.2881	57.6718
AH10.2.1	WBGene00007083	AH10.2	0	0	0	0	0	0	0	0	0	0	0	0	0	0	0	0	0	0	0	0	0	0	0	0	0	0	0	0	0	0	0	0	0	0	0	0	0	0	0	0	0	0	0	0	0	0	0
AH10.4.1	WBGene00007085	AH10.4	0	2	2	0	0	3	2	5	8	2	7	10	0	0	0	0	0	0	0	0	0	0	0	0	0	0.0338642	0.0362269	0	0	0.0491275	0.0303861	0.0886433	0.172661	0.0327624	0.112212	0.156763	0	0	0	0	0	0	0	0	0	0	0
AH6.17.1	WBGene00219290	AH6.17	0	0	0	0	0	0	0	0	0	0	0	0	0	0	0	0	0	0	0	0	0	0	0	0	0	0	0	0	0	0	0	0	0	0	0	0	0	0	0	0	0	0	0	0	0	0	0
AH6.3.1	WBGene00007081	AH6.3	0	0	0	0	0	0	0	0	0	0	0	0	0	0	0	0	0	0	0	0	0	0	0	0	0	0	0	0	0	0	0	0	0	0	0	0	0	0	0	0	0	0	0	0	0	0	0
AH9.1.1	WBGene00014998	AH9.1	60	78	30	52	47	37	53	41	25	59	68	30	3	2	2	0	0	0	0	0	0	0	0	4	1.05369	1.3207	0.543403	0.837466	0.826389	0.605906	0.805231	0.726875	0.539567	0.96649	1.09006	0.47029	0.41979	0.181106	0.434088	0	0	0	0	0	0	0	0
AH9.3.1	WBGene00014999	AH9.3	143	150	145	107	79	126	91	116	86	94	114	114	15	16	17	17	5	0	33	29	17	5	13	9	2.51129	2.53981	2.62645	1.72325	1.38904	2.06336	1.38257	2.05653	1.85611	1.53983	1.82745	1.7871	2.09895	1.44885	3.68975	4.6552	1.67427	0	5.32928	8.45142	3.85731	1.16386	5.31726
AH9.4.1	WBGene00015000	AH9.4	8	3	6	4	3	7	8	9	7	2	11	9	0	0	0	0	0	0	0	0	0	0	0	0	0.140492	0.0507963	0.108681	0.0644205	0.0527482	0.114631	0.121544	0.159558	0.151079	0.0327624	0.176333	0.141087	0	0	0	0	0	0	0	0	0	0	0
AH9.6.1	WBGene00044701	AH9.6	30	30	33	24	31	36	35	29	22	26	36	40	1	0	0	0	0	0	0	0	3	0	0	0	0.526845	0.507963	0.597743	0.386523	0.545065	0.58953	0.531757	0.514131	0.474819	0.425911	0.577089	0.627053	0.13993	0	0	0	0	0	0	0	0.680702	0	0
C25A1.11a.1	WBGene00000095	aha-1	340	367	446	333	299	410	428	489	332	364	379	439	37	61	81	64	14	35	32	0	28	39	2	23	5.97091	6.21408	8.07859	5.363	5.25724	6.71409	6.50262	8.66932	7.16545	5.96275	6.07547	6.88191	5.17741	5.52372	17.5806	17.5254	4.68795	9.56159	5.16779	0	6.35322	9.07813	0.81804
C25A1.11b.1	WBGene00000095	aha-1	340	367	446	333	299	410	428	489	332	364	379	439	37	61	81	64	14	35	32	0	28	39	2	23	5.97091	6.21408	8.07859	5.363	5.25724	6.71409	6.50262	8.66932	7.16545	5.96275	6.07547	6.88191	5.17741	5.52372	17.5806	17.5254	4.68795	9.56159	5.16779	0	6.35322	9.07813	0.81804
K02F2.2.1	WBGene00019322	ahcy-1	8701	8348	7131	21578	19609	21759	24060	22578	16397	20350	22812	21807	1898	2813	516	2009	1775	1279	3531	1366	2721	3124	1516	1112	152.803	141.349	129.167	347.516	344.78	356.322	365.545	400.278	353.891	333.357	365.682	341.854	265.587	254.725	111.995	550.135	594.365	349.408	570.233	398.091	617.397	727.182	620.074
K02F2.2.2	WBGene00019322	ahcy-1	8701	8348	7131	21578	19609	21759	24060	22578	16397	20350	22812	21807	1898	2813	516	2009	1775	1279	3531	1366	2721	3124	1516	1112	152.803	141.349	129.167	347.516	344.78	356.322	365.545	400.278	353.891	333.357	365.682	341.854	265.587	254.725	111.995	550.135	594.365	349.408	570.233	398.091	617.397	727.182	620.074
K04G2.2.1	WBGene00045192	aho-3	197	186	175	202	176	219	223	203	168	210	235	228	44	77	40	36	18	59	74	44	50	40	25	40	3.45961	3.14937	3.16985	3.25323	3.09456	3.58631	3.38805	3.59892	3.62589	3.44005	3.76711	3.5742	6.15692	6.97257	8.68176	9.85806	6.02737	16.1181	11.9505	12.8228	11.345	9.3109	10.2255
C41G7.5a.1	WBGene00000096	ahr-1	3	4	7	6	9	3	11	8	8	5	7	8	0	1	0	0	0	0	0	0	0	0	0	0	0.0526845	0.0677284	0.126794	0.0966307	0.158245	0.0491275	0.167124	0.141829	0.172661	0.081906	0.112212	0.125411	0	0.0905528	0	0	0	0	0	0	0	0	0
C41G7.5b.1	WBGene00000096	ahr-1	3	4	7	6	9	3	8	8	7	5	7	7	0	0	0	0	0	0	0	0	0	0	0	0	0.0526845	0.0677284	0.126794	0.0966307	0.158245	0.0491275	0.121544	0.141829	0.151079	0.081906	0.112212	0.109734	0	0	0	0	0	0	0	0	0	0	0
C01G10.8.1	WBGene00007235	ahsa-1	543	491	579	757	621	741	704	868	577	773	803	887	112	200	75	157	109	110	137	70	109	112	58	80	9.53589	8.31366	10.4877	12.1916	10.9189	12.1345	10.6959	15.3885	12.4532	12.6627	12.8723	13.9049	15.6721	18.1106	16.2783	42.9921	36.4991	30.0507	22.1246	20.4	24.7322	26.0705	23.7232
C01G10.8.2	WBGene00007235	ahsa-1	543	491	579	757	621	741	704	868	577	773	803	887	112	200	75	157	109	110	137	70	109	112	58	80	9.53589	8.31366	10.4877	12.1916	10.9189	12.1345	10.6959	15.3885	12.4532	12.6627	12.8723	13.9049	15.6721	18.1106	16.2783	42.9921	36.4991	30.0507	22.1246	20.4	24.7322	26.0705	23.7232
C06G1.4.1	WBGene00015547	ain-1	1286	1305	1180	1042	984	1176	1287	1135	943	1207	1267	1268	280	469	224	131	89	85	338	126	182	151	114	149	22.5841	22.0964	21.3738	16.7815	17.3014	19.258	19.5535	20.122	20.3525	19.7721	20.3103	19.8776	39.1804	42.4693	48.6179	35.8724	29.802	23.221	54.5848	36.72	41.2959	35.1487	46.6283
B0041.2a.1	WBGene00015007	ain-2	1747	1762	1718	1550	1512	1654	1843	1731	1253	1632	1717	1935	195	297	119	119	71	65	233	115	103	128	62	76	30.6799	29.8343	31.1189	24.9629	26.5851	27.0856	28.0008	30.6883	27.0431	26.7341	27.5239	30.3337	27.2863	26.8942	25.8282	32.5864	23.7746	17.7572	37.628	33.5143	23.3708	29.7949	25.3592
B0041.2a.2	WBGene00015007	ain-2	1747	1762	1718	1550	1512	1654	1843	1731	1253	1632	1717	1935	195	297	119	119	71	65	233	115	103	128	62	76	30.6799	29.8343	31.1189	24.9629	26.5851	27.0856	28.0008	30.6883	27.0431	26.7341	27.5239	30.3337	27.2863	26.8942	25.8282	32.5864	23.7746	17.7572	37.628	33.5143	23.3708	29.7949	25.3592
B0041.2b.1	WBGene00015007	ain-2	1748	1762	1721	1550	1513	1656	1846	1732	1256	1634	1717	1937	195	299	116	119	71	65	233	115	90	130	57	74	30.6975	29.8343	31.1732	24.9629	26.6027	27.1184	28.0464	30.7061	27.1079	26.7669	27.5239	30.365	27.2863	27.0753	25.1771	32.5864	23.7746	17.7572	37.628	33.5143	20.4211	30.2604	23.3141
B0041.2c.1	WBGene00015007	ain-2	1747	1762	1718	1550	1512	1654	1843	1731	1253	1632	1717	1935	195	299	116	119	71	65	233	115	87	128	57	74	30.6799	29.8343	31.1189	24.9629	26.5851	27.0856	28.0008	30.6883	27.0431	26.7341	27.5239	30.3337	27.2863	27.0753	25.1771	32.5864	23.7746	17.7572	37.628	33.5143	19.7404	29.7949	23.3141
B0041.2c.2	WBGene00015007	ain-2	1747	1762	1718	1550	1512	1654	1843	1731	1253	1632	1717	1935	195	299	116	119	71	65	233	115	87	128	57	74	30.6799	29.8343	31.1189	24.9629	26.5851	27.0856	28.0008	30.6883	27.0431	26.7341	27.5239	30.3337	27.2863	27.0753	25.1771	32.5864	23.7746	17.7572	37.628	33.5143	19.7404	29.7949	23.3141
B0041.2d.1	WBGene00015007	ain-2	1748	1762	1721	1550	1513	1656	1846	1732	1256	1634	1717	1937	195	297	119	119	71	65	233	115	106	130	62	76	30.6975	29.8343	31.1732	24.9629	26.6027	27.1184	28.0464	30.7061	27.1079	26.7669	27.5239	30.365	27.2863	26.8942	25.8282	32.5864	23.7746	17.7572	37.628	33.5143	24.0515	30.2604	25.3592
B0041.2e.1	WBGene00015007	ain-2	1748	1762	1720	1550	1513	1656	1844	1731	1254	1633	1715	1936	188	291	119	119	70	65	216	115	106	126	61	76	30.6975	29.8343	31.1551	24.9629	26.6027	27.1184	28.016	30.6883	27.0647	26.7505	27.4919	30.3494	26.3068	26.3509	25.8282	32.5864	23.4398	17.7572	34.8826	33.5143	24.0515	29.3293	24.9502
B0041.2f.1	WBGene00015007	ain-2	1748	1762	1720	1550	1513	1656	1844	1731	1254	1633	1715	1936	188	293	116	119	70	65	216	115	90	126	56	74	30.6975	29.8343	31.1551	24.9629	26.6027	27.1184	28.016	30.6883	27.0647	26.7505	27.4919	30.3494	26.3068	26.532	25.1771	32.5864	23.4398	17.7572	34.8826	33.5143	20.4211	29.3293	22.9051
B0041.2g.1	WBGene00015007	ain-2	1747	1762	1718	1550	1512	1654	1842	1730	1251	1631	1715	1934	188	293	116	119	70	65	216	115	87	124	56	74	30.6799	29.8343	31.1189	24.9629	26.5851	27.0856	27.9856	30.6706	26.9999	26.7177	27.4919	30.318	26.3068	26.532	25.1771	32.5864	23.4398	17.7572	34.8826	33.5143	19.7404	28.8638	22.9051
B0041.2g.2	WBGene00015007	ain-2	1747	1762	1718	1550	1512	1654	1842	1730	1251	1631	1715	1934	188	293	116	119	70	65	216	115	87	124	56	74	30.6799	29.8343	31.1189	24.9629	26.5851	27.0856	27.9856	30.6706	26.9999	26.7177	27.4919	30.318	26.3068	26.532	25.1771	32.5864	23.4398	17.7572	34.8826	33.5143	19.7404	28.8638	22.9051
F58E10.4.1	WBGene00000097	aip-1	206	183	201	182	160	199	192	168	138	157	156	199	59	39	21	5	8	13	62	51	16	14	11	20	3.61767	3.09857	3.6408	2.93113	2.81324	3.25879	2.91706	2.97842	2.97841	2.57185	2.50072	3.11959	8.25586	3.53156	4.55792	1.36918	2.67883	3.55145	10.0126	14.8628	3.63041	3.25882	4.49922
K08F9.2.1	WBGene00010685	aipl-1	323	230	196	242	238	255	302	274	248	222	274	221	78	99	28	40	25	8	70	45	62	44	30	21	5.67236	3.89438	3.55023	3.89744	4.18469	4.17584	4.5883	4.85766	5.35251	3.63662	4.39229	3.46447	10.9145	8.96473	6.07723	10.9534	8.37134	2.18551	11.3045	13.1143	14.0678	10.242	12.2706
K08F9.2.2	WBGene00010685	aipl-1	323	230	196	242	238	255	302	274	248	222	274	221	78	99	28	40	25	8	70	45	62	44	30	21	5.67236	3.89438	3.55023	3.89744	4.18469	4.17584	4.5883	4.85766	5.35251	3.63662	4.39229	3.46447	10.9145	8.96473	6.07723	10.9534	8.37134	2.18551	11.3045	13.1143	14.0678	10.242	12.2706
C56C10.10.1	WBGene00016966	aipr-1	178	198	201	183	157	209	211	223	209	178	205	217	36	54	38	0	9	7	20	30	27	27	12	13	3.12595	3.35255	3.6408	2.94724	2.76049	3.42255	3.20573	3.95349	4.51078	2.91585	3.2862	3.40176	5.03748	4.88985	8.24767	0	3.01368	1.91232	3.22987	8.74285	6.12632	6.28486	4.90824
K07C11.2.1	WBGene00000098	air-1	68	31	26	59	45	67	44	40	33	27	39	28	4	26	0	0	16	17	0	0	0	1	2	0	1.19418	0.524895	0.470949	0.950202	0.791224	1.09718	0.668494	0.709147	0.712229	0.442292	0.62518	0.438937	0.55972	2.35437	0	0	5.35766	4.6442	0	0	0	0.232773	0.81804
K07C11.2.2	WBGene00000098	air-1	68	31	26	59	45	67	44	40	33	27	39	28	4	26	0	0	16	17	0	0	0	1	2	0	1.19418	0.524895	0.470949	0.950202	0.791224	1.09718	0.668494	0.709147	0.712229	0.442292	0.62518	0.438937	0.55972	2.35437	0	0	5.35766	4.6442	0	0	0	0.232773	0.81804
B0207.4.1	WBGene00000099	air-2	25	1	2	3	0	2	9	4	1	2	1	1	0	0	0	0	0	0	0	0	0	0	0	0	0.439037	0.0169321	0.0362269	0.0483153	0	0.0327517	0.136737	0.0709147	0.0215827	0.0327624	0.0160303	0.0156763	0	0	0	0	0	0	0	0	0	0	0
C25A11.4a.1	WBGene00000100	ajm-1	4006	3760	3844	3319	3092	3208	3640	3340	2525	3581	3495	3746	700	1110	410	419	248	118	465	255	281	366	233	214	70.3513	63.6647	69.628	53.4529	54.3659	52.5337	55.3027	59.2138	54.4963	58.661	56.0257	58.7235	97.9509	100.514	88.988	114.737	83.0437	32.2362	75.0944	74.3142	63.7591	85.1948	95.3017
C25A11.4b.1	WBGene00000100	ajm-1	3559	3329	3394	3011	2838	2951	3358	2999	2277	3190	3209	3397	682	1059	392	378	245	125	470	197	263	345	211	183	62.5013	56.3669	61.477	48.4925	49.8998	48.3251	51.0182	53.1683	49.1438	52.256	51.4411	53.2525	95.4322	95.8954	85.0812	103.51	82.0392	34.1485	75.9019	57.4114	59.6749	80.3066	86.3032
C25A11.4c.1	WBGene00000100	ajm-1	3921	3670	3775	3307	3094	3244	3690	3280	2527	3489	3510	3719	706	1120	424	424	270	128	482	211	274	356	231	206	68.8586	62.1408	68.3782	53.2596	54.401	53.1232	56.0623	58.15	54.5395	57.154	56.2662	58.3003	98.7905	101.419	92.0267	116.106	90.4105	34.9681	77.8398	61.4914	62.1708	82.8671	94.4836
C25A11.4c.2	WBGene00000100	ajm-1	3921	3670	3775	3307	3094	3244	3690	3280	2527	3489	3510	3719	706	1118	424	424	270	128	482	211	274	352	231	206	68.8586	62.1408	68.3782	53.2596	54.401	53.1232	56.0623	58.15	54.5395	57.154	56.2662	58.3003	98.7905	101.238	92.0267	116.106	90.4105	34.9681	77.8398	61.4914	62.1708	81.936	94.4836
C25A11.4d.1	WBGene00000100	ajm-1	4237	4028	4120	3597	3356	3489	3947	3591	2740	3825	3795	4038	723	1131	444	434	270	128	482	255	291	368	236	216	74.408	68.2025	74.6273	57.9301	59.0077	57.1353	59.967	63.6636	59.1366	62.6581	60.8348	63.301	101.169	102.415	96.3675	118.844	90.4105	34.9681	77.8398	74.3142	66.0281	85.6603	96.5287
C25A11.4e.1	WBGene00000100	ajm-1	3226	2950	2996	2591	2425	2488	2849	2571	1987	2801	2744	2931	633	1003	347	391	230	105	414	208	245	315	223	178	56.6534	49.9497	54.2678	41.7283	42.6382	40.7431	43.285	45.5804	42.8848	45.8837	43.987	45.9473	88.5756	90.8245	75.3143	107.07	77.0163	28.6848	66.8583	60.6171	55.5907	73.3234	91.2115
C25A11.4f.1	WBGene00000100	ajm-1	4240	4033	4124	3597	3357	3489	3950	3592	2746	3825	3798	4042	726	1131	444	434	270	128	482	255	291	368	236	216	74.4607	68.2871	74.6998	57.9301	59.0253	57.1353	60.0125	63.6814	59.2661	62.6581	60.8829	63.3637	101.589	102.415	96.3675	118.844	90.4105	34.9681	77.8398	74.3142	66.0281	85.6603	96.5287
C25A11.4f.2	WBGene00000100	ajm-1	4240	4033	4124	3597	3357	3489	3950	3592	2746	3825	3798	4042	726	1133	444	434	270	128	482	255	291	372	236	216	74.4607	68.2871	74.6998	57.9301	59.0253	57.1353	60.0125	63.6814	59.2661	62.6581	60.8829	63.3637	101.589	102.596	96.3675	118.844	90.4105	34.9681	77.8398	74.3142	66.0281	86.5914	96.5287
C25A11.4g.1	WBGene00000100	ajm-1	4025	3781	3859	3332	3127	3217	3654	3359	2535	3596	3513	3761	704	1112	410	419	248	118	465	255	282	366	233	214	70.685	64.0202	69.8997	53.6622	54.9813	52.6811	55.5154	59.5506	54.7121	58.9068	56.3143	58.9587	98.5106	100.695	88.988	114.737	83.0437	32.2362	75.0944	74.3142	63.986	85.1948	95.3017
C25A11.4h.1	WBGene00000100	ajm-1	3858	3621	3692	3166	2939	3045	3465	3154	2391	3431	3334	3582	699	1098	410	419	248	105	462	255	277	366	233	211	67.7522	61.3111	66.8748	50.9888	51.6757	49.8644	52.6439	55.9162	51.6042	56.2039	53.4449	56.1526	97.811	99.427	88.988	114.737	83.0437	28.6848	74.61	74.3142	62.8515	85.1948	95.3017
C25A11.4i.1	WBGene00000100	ajm-1	3719	3484	3543	3042	2830	2922	3349	3024	2296	3309	3203	3461	688	1088	404	419	237	105	450	255	273	364	233	209	65.3112	58.9914	64.1759	48.9918	49.7592	47.8502	50.8815	53.6115	49.5539	54.2054	51.3449	54.2558	96.2718	98.5215	87.6858	114.737	79.3603	28.6848	72.672	74.3142	61.9439	84.7292	95.3017
C25A11.4j.1	WBGene00000100	ajm-1	3672	3383	3463	2976	2771	2861	3279	2955	2241	3240	3145	3387	688	1088	404	419	237	105	450	255	273	364	233	209	64.4858	57.2813	62.7268	47.9288	48.7218	46.8513	49.818	52.3882	48.3668	53.0751	50.4151	53.0957	96.2718	98.5215	87.6858	114.737	79.3603	28.6848	72.672	74.3142	61.9439	84.7292	95.3017
C25A11.4k.1	WBGene00000100	ajm-1	4142	3933	4004	3497	3258	3363	3829	3503	2645	3741	3684	3929	711	1117	415	421	248	118	465	255	284	368	236	214	72.7397	66.5939	72.5262	56.3196	57.2846	55.0719	58.1742	62.1035	57.0862	61.282	59.0554	61.5923	99.4902	101.148	90.0733	115.285	83.0437	32.2362	75.0944	74.3142	64.4398	85.6603	96.5287
C25A11.4l.1	WBGene00000100	ajm-1	4078	3848	3934	3392	3181	3276	3729	3401	2576	3646	3584	3837	711	1116	410	419	248	118	465	255	282	368	233	214	71.6158	65.1547	71.2582	54.6285	55.9307	53.6472	56.6549	60.2952	55.597	59.7258	57.4524	60.1501	99.4902	101.057	88.988	114.737	83.0437	32.2362	75.0944	74.3142	63.986	85.6603	95.3017
C25A11.4m.1	WBGene00000100	ajm-1	4065	3826	3910	3373	3168	3260	3699	3388	2566	3631	3560	3817	704	1115	410	419	248	118	465	255	282	366	233	214	71.3875	64.7822	70.8235	54.3225	55.7021	53.3852	56.1991	60.0647	55.3812	59.4801	57.0677	59.8365	98.5106	100.966	88.988	114.737	83.0437	32.2362	75.0944	74.3142	63.986	85.1948	95.3017
D1022.7a.1	WBGene00000101	aka-1	1842	1592	1556	1644	1489	1555	1654	1404	1180	1581	1517	1594	119	197	64	38	42	41	79	30	66	55	54	35	32.3483	26.9559	28.1845	26.4768	26.1807	25.4644	25.1293	24.8911	25.4676	25.8987	24.3179	24.9881	16.6517	17.8389	13.8908	10.4057	14.0639	11.2007	12.758	8.74285	14.9754	12.8025	22.0871
D1022.7a.2	WBGene00000101	aka-1	1842	1592	1556	1644	1489	1555	1654	1404	1180	1581	1517	1594	119	198	64	38	42	41	79	30	66	55	54	35	32.3483	26.9559	28.1845	26.4768	26.1807	25.4644	25.1293	24.8911	25.4676	25.8987	24.3179	24.9881	16.6517	17.9295	13.8908	10.4057	14.0639	11.2007	12.758	8.74285	14.9754	12.8025	22.0871
D1022.7b.1	WBGene00000101	aka-1	1842	1592	1556	1644	1489	1555	1654	1404	1180	1581	1517	1594	119	197	64	38	42	41	79	30	66	55	54	35	32.3483	26.9559	28.1845	26.4768	26.1807	25.4644	25.1293	24.8911	25.4676	25.8987	24.3179	24.9881	16.6517	17.8389	13.8908	10.4057	14.0639	11.2007	12.758	8.74285	14.9754	12.8025	22.0871
D1022.7b.2	WBGene00000101	aka-1	1842	1592	1556	1644	1489	1555	1654	1404	1180	1581	1517	1594	119	198	64	38	42	41	79	30	66	55	54	35	32.3483	26.9559	28.1845	26.4768	26.1807	25.4644	25.1293	24.8911	25.4676	25.8987	24.3179	24.9881	16.6517	17.9295	13.8908	10.4057	14.0639	11.2007	12.758	8.74285	14.9754	12.8025	22.0871
D1022.7c.1	WBGene00000101	aka-1	1019	914	865	899	811	833	911	793	671	839	811	883	38	64	25	10	17	16	15	15	30	18	20	9	17.8952	15.4759	15.6681	14.4785	14.2596	13.6411	13.8409	14.0588	14.482	13.7438	13.0005	13.8422	5.31734	5.79538	5.4261	2.73835	5.69251	4.37101	2.4224	4.37143	6.80702	4.18991	8.1804
D1022.7c.2	WBGene00000101	aka-1	1019	914	865	899	811	833	911	793	671	839	811	883	38	65	25	10	17	16	15	15	30	18	20	9	17.8952	15.4759	15.6681	14.4785	14.2596	13.6411	13.8409	14.0588	14.482	13.7438	13.0005	13.8422	5.31734	5.88593	5.4261	2.73835	5.69251	4.37101	2.4224	4.37143	6.80702	4.18991	8.1804
C56G2.1a.1	WBGene00016977	akap-1	3369	2990	2928	3394	3076	3217	3509	2950	2377	3742	3473	3809	236	327	226	138	93	231	193	304	290	165	195	169	59.1647	50.627	53.0361	54.6608	54.0845	52.6811	53.3124	52.2996	51.302	61.2984	55.6731	59.7111	33.0235	29.6108	49.0519	37.7892	31.1414	63.1065	31.1682	88.5942	65.8012	38.4075	79.7589
C56G2.1b.1	WBGene00016977	akap-1	1785	1558	1518	1684	1582	1653	1850	1591	1128	2001	1790	1882	191	294	174	65	57	147	129	290	231	114	143	133	31.3473	26.3802	27.4962	27.121	27.8159	27.0693	28.1071	28.2063	24.3453	32.7788	28.6942	29.5028	26.7266	26.6225	37.7657	17.7993	19.0867	40.1587	20.8327	84.5142	52.4141	26.5361	58.4899
C56G2.1b.2	WBGene00016977	akap-1	1785	1558	1518	1684	1582	1653	1850	1591	1128	2001	1790	1882	191	294	174	65	57	147	129	290	231	114	143	133	31.3473	26.3802	27.4962	27.121	27.8159	27.0693	28.1071	28.2063	24.3453	32.7788	28.6942	29.5028	26.7266	26.6225	37.7657	17.7993	19.0867	40.1587	20.8327	84.5142	52.4141	26.5361	58.4899
C56G2.1c.1	WBGene00016977	akap-1	3369	2990	2927	3394	3075	3215	3508	2950	2377	3741	3472	3808	231	325	224	127	92	219	185	304	287	156	193	169	59.1647	50.627	53.018	54.6608	54.067	52.6483	53.2972	52.2996	51.302	61.282	55.657	59.6955	32.3238	29.4297	48.6179	34.7771	30.8065	59.8282	29.8763	88.5942	65.1205	36.3125	78.9409
C56G2.1d.1	WBGene00016977	akap-1	3369	2990	2928	3394	3076	3217	3509	2950	2377	3742	3473	3809	236	327	226	138	93	231	193	304	290	165	195	169	59.1647	50.627	53.0361	54.6608	54.0845	52.6811	53.3124	52.2996	51.302	61.2984	55.6731	59.7111	33.0235	29.6108	49.0519	37.7892	31.1414	63.1065	31.1682	88.5942	65.8012	38.4075	79.7589
C56G2.1e.1	WBGene00016977	akap-1	3338	2941	2884	3358	3036	3170	3448	2903	2345	3699	3426	3741	232	326	221	138	93	231	193	304	280	165	195	164	58.6203	49.7973	52.2391	54.081	53.3812	51.9114	52.3856	51.4663	50.6114	60.594	54.9196	58.6451	32.4637	29.5202	47.9667	37.7892	31.1414	63.1065	31.1682	88.5942	63.5322	38.4075	79.7589
E01A2.6.1	WBGene00017088	akir-1	543	464	427	426	480	432	426	359	310	419	436	439	95	159	72	61	33	18	88	63	51	71	26	24	9.53589	7.85649	7.73443	6.86078	8.43972	7.07436	6.47224	6.36459	6.69063	6.86372	6.98919	6.88191	13.2933	14.3979	15.6272	16.7039	11.0502	4.91739	14.2114	18.36	11.5719	16.5269	10.6345
E01A2.6.2	WBGene00017088	akir-1	543	464	427	426	480	432	426	359	310	419	436	439	95	159	72	61	33	18	88	63	51	71	26	24	9.53589	7.85649	7.73443	6.86078	8.43972	7.07436	6.47224	6.36459	6.69063	6.86372	6.98919	6.88191	13.2933	14.3979	15.6272	16.7039	11.0502	4.91739	14.2114	18.36	11.5719	16.5269	10.6345
E01A2.6.3	WBGene00017088	akir-1	543	464	427	426	480	432	426	359	310	419	436	439	95	159	72	61	33	18	88	63	51	71	26	24	9.53589	7.85649	7.73443	6.86078	8.43972	7.07436	6.47224	6.36459	6.69063	6.86372	6.98919	6.88191	13.2933	14.3979	15.6272	16.7039	11.0502	4.91739	14.2114	18.36	11.5719	16.5269	10.6345
C12D8.10a.1	WBGene00000102	akt-1	2021	1955	2455	1209	1000	1523	1190	1424	874	1418	1434	1802	216	340	232	50	40	88	164	37	40	119	37	91	35.4918	33.1022	44.4685	19.4711	17.5827	24.9404	18.0797	25.2456	18.8633	23.2285	22.9874	28.2487	30.2249	30.788	50.3542	13.6918	13.3941	24.0406	26.4849	10.7828	9.07603	27.6999	15.1337
C12D8.10a.2	WBGene00000102	akt-1	2021	1955	2455	1209	1000	1523	1190	1424	874	1418	1434	1802	216	340	232	50	40	88	164	37	40	119	37	91	35.4918	33.1022	44.4685	19.4711	17.5827	24.9404	18.0797	25.2456	18.8633	23.2285	22.9874	28.2487	30.2249	30.788	50.3542	13.6918	13.3941	24.0406	26.4849	10.7828	9.07603	27.6999	15.1337
C12D8.10b.1	WBGene00000102	akt-1	2032	1949	2481	1218	995	1517	1194	1426	875	1412	1439	1823	225	363	248	50	40	88	153	37	40	119	37	89	35.685	33.0006	44.9394	19.616	17.4948	24.8421	18.1405	25.2811	18.8849	23.1302	23.0675	28.5779	31.4842	32.8707	53.8269	13.6918	13.3941	24.0406	24.7085	10.7828	9.07603	27.6999	15.1337
C12D8.10b.2	WBGene00000102	akt-1	2032	1949	2481	1218	995	1517	1194	1426	875	1412	1439	1823	225	363	248	50	40	88	153	37	40	119	37	89	35.685	33.0006	44.9394	19.616	17.4948	24.8421	18.1405	25.2811	18.8849	23.1302	23.0675	28.5779	31.4842	32.8707	53.8269	13.6918	13.3941	24.0406	24.7085	10.7828	9.07603	27.6999	15.1337
C12D8.10c.1	WBGene00000102	akt-1	1029	1026	1249	630	497	803	623	741	472	745	741	914	71	77	96	0	4	25	74	10	11	48	16	28	18.0708	17.3723	22.6237	10.1462	8.73863	13.1498	9.46527	13.1369	10.187	12.204	11.8784	14.3282	9.93502	6.97257	20.8362	0	1.33941	6.82971	11.9505	2.91428	2.49591	11.1731	6.54432
F28H6.1a.1	WBGene00000103	akt-2	942	1052	1076	866	709	734	647	696	508	758	791	888	207	249	167	76	38	88	44	55	81	85	49	70	16.5429	17.8126	19.49	13.947	12.4662	12.0199	9.8299	12.3392	10.964	12.4169	12.6799	13.9206	28.9655	22.5477	36.2463	20.8115	12.7244	24.0406	7.10571	16.0286	18.379	19.7857	20.042
F28H6.1b.1	WBGene00000103	akt-2	877	982	978	807	652	677	593	644	473	696	731	826	197	226	137	52	38	86	54	69	74	71	43	60	15.4014	16.6273	17.7149	12.9968	11.464	11.0864	9.00948	11.4173	10.2086	11.4013	11.7181	12.9486	27.5662	20.4649	29.735	14.2394	12.7244	23.4942	8.72064	20.1086	16.7907	16.5269	17.5879
T05D4.1.1	WBGene00011474	aldo-1	6970	9515	9031	7944	7718	8094	11868	9891	9944	9222	10142	9997	2156	4047	1724	1000	709	1120	2355	1413	1889	1274	748	1077	122.404	161.109	163.582	127.939	135.704	132.546	180.311	175.354	214.618	151.067	162.579	156.716	301.689	366.467	374.184	273.835	237.411	305.971	380.317	411.788	428.615	296.552	305.947
T05D4.1.2	WBGene00011474	aldo-1	6970	9515	9031	7944	7718	8094	11868	9891	9944	9222	10142	9997	2156	4047	1724	1000	709	1120	2355	1413	1889	1274	748	1077	122.404	161.109	163.582	127.939	135.704	132.546	180.311	175.354	214.618	151.067	162.579	156.716	301.689	366.467	374.184	273.835	237.411	305.971	380.317	411.788	428.615	296.552	305.947
F01F1.12a.1	WBGene00017166	aldo-2	30164	32530	36249	30221	25414	31951	27923	30299	20902	27918	27427	30909	5454	5373	2203	1703	1523	1922	3904	2115	2889	2169	1336	1638	529.725	550.801	656.594	486.713	446.848	523.224	424.235	537.161	451.121	457.33	439.662	484.54	763.178	486.54	478.148	466.341	509.982	525.068	630.47	616.371	655.516	504.884	546.451
F01F1.12a.2	WBGene00017166	aldo-2	30164	32530	36249	30221	25414	31951	27923	30299	20902	27918	27427	30909	5454	5373	2203	1703	1523	1922	3904	2115	2889	2169	1336	1638	529.725	550.801	656.594	486.713	446.848	523.224	424.235	537.161	451.121	457.33	439.662	484.54	763.178	486.54	478.148	466.341	509.982	525.068	630.47	616.371	655.516	504.884	546.451
F01F1.12b.1	WBGene00017166	aldo-2	26345	28113	30949	26458	22155	28133	24499	26114	18333	24596	23942	26818	4457	3403	1258	1197	1076	1123	2960	1379	1849	1568	870	978	462.657	476.012	560.592	426.109	389.546	460.701	372.214	462.966	395.675	402.912	383.796	420.408	623.668	308.151	273.041	327.781	360.303	306.79	478.021	401.88	419.539	364.987	355.847
F01F1.12b.2	WBGene00017166	aldo-2	26345	28113	30949	26458	22155	28133	24499	26114	18333	24596	23942	26818	4457	3403	1258	1197	1076	1123	2960	1379	1849	1568	870	978	462.657	476.012	560.592	426.109	389.546	460.701	372.214	462.966	395.675	402.912	383.796	420.408	623.668	308.151	273.041	327.781	360.303	306.79	478.021	401.88	419.539	364.987	355.847
F18A1.6a.1	WBGene00017547	alfa-1	515	517	452	497	394	465	491	421	352	489	509	492	18	83	37	9	24	63	18	0	11	17	9	17	9.04417	8.75389	8.18727	8.00424	6.9276	7.61476	7.45979	7.46377	7.59711	8.0104	8.1594	7.71275	2.51874	7.51589	8.03063	2.46452	8.03649	17.2109	2.90688	0	2.49591	3.95713	3.68118
F18A1.6b.1	WBGene00017547	alfa-1	515	517	452	497	394	466	492	420	352	490	511	492	18	83	37	9	24	63	18	0	11	17	10	17	9.04417	8.75389	8.18727	8.00424	6.9276	7.63114	7.47498	7.44604	7.59711	8.02678	8.19146	7.71275	2.51874	7.51589	8.03063	2.46452	8.03649	17.2109	2.90688	0	2.49591	3.95713	4.0902
F18A1.6b.2	WBGene00017547	alfa-1	515	517	452	497	394	466	492	420	352	490	511	492	18	83	37	9	24	63	18	0	11	17	10	17	9.04417	8.75389	8.18727	8.00424	6.9276	7.63114	7.47498	7.44604	7.59711	8.02678	8.19146	7.71275	2.51874	7.51589	8.03063	2.46452	8.03649	17.2109	2.90688	0	2.49591	3.95713	4.0902
F18A1.6b.3	WBGene00017547	alfa-1	515	517	452	497	394	466	492	420	352	490	511	492	18	83	37	9	24	63	18	0	11	17	10	17	9.04417	8.75389	8.18727	8.00424	6.9276	7.63114	7.47498	7.44604	7.59711	8.02678	8.19146	7.71275	2.51874	7.51589	8.03063	2.46452	8.03649	17.2109	2.90688	0	2.49591	3.95713	4.0902
F48F7.1a.1	WBGene00000105	alg-1	1797	1613	1483	1471	1443	1454	1682	1237	1057	1491	1445	1465	116	154	71	68	50	46	53	90	74	33	27	50	31.558	27.3115	26.8622	23.6906	25.3719	23.8105	25.5547	21.9304	22.8129	24.4244	23.1637	22.9658	16.2319	13.9451	15.4101	18.6208	16.7427	12.5667	8.55915	26.2286	16.7907	7.6815	11.0435
F48F7.1b.1	WBGene00000105	alg-1	1807	1632	1500	1482	1461	1469	1695	1247	1065	1500	1455	1470	116	154	71	68	50	46	53	90	79	33	27	50	31.7336	27.6332	27.1701	23.8678	25.6884	24.0561	25.7522	22.1077	22.9856	24.5718	23.324	23.0442	16.2319	13.9451	15.4101	18.6208	16.7427	12.5667	8.55915	26.2286	17.9252	7.6815	11.0435
T07D3.7a.1	WBGene00000106	alg-2	541	505	430	494	462	479	584	444	385	521	508	512	33	70	13	18	13	34	23	17	18	33	20	21	9.50077	8.55071	7.78877	7.95593	8.12323	7.84402	8.87274	7.87153	8.30933	8.5346	8.14337	8.02628	4.61769	6.3387	2.82157	4.92903	4.3531	9.2884	3.71435	4.95428	4.08421	7.6815	8.1804
T07D3.7b.1	WBGene00000106	alg-2	541	505	430	494	462	479	584	444	383	521	507	512	33	70	13	18	13	34	23	17	18	33	20	21	9.50077	8.55071	7.78877	7.95593	8.12323	7.84402	8.87274	7.87153	8.26617	8.5346	8.12734	8.02628	4.61769	6.3387	2.82157	4.92903	4.3531	9.2884	3.71435	4.95428	4.08421	7.6815	8.1804
T22B3.2a.1	WBGene00011910	alg-3	10	6	3	2	6	6	6	3	5	9	4	6	0	0	0	0	0	0	0	0	0	0	0	0	0.175615	0.101593	0.0543403	0.0322102	0.105496	0.098255	0.0911583	0.053186	0.107913	0.147431	0.064121	0.094058	0	0	0	0	0	0	0	0	0	0	0
T22B3.2b.1	WBGene00011910	alg-3	10	6	3	2	6	6	6	3	5	9	4	6	0	0	0	0	0	0	0	0	0	0	0	0	0.175615	0.101593	0.0543403	0.0322102	0.105496	0.098255	0.0911583	0.053186	0.107913	0.147431	0.064121	0.094058	0	0	0	0	0	0	0	0	0	0	0
ZK757.3a.1	WBGene00006449	alg-4	4	1	2	1	0	4	1	3	1	6	1	3	0	0	0	0	0	0	0	0	0	0	0	0	0.070246	0.0169321	0.0362269	0.0161051	0	0.0655033	0.015193	0.053186	0.0215827	0.0982871	0.0160303	0.047029	0	0	0	0	0	0	0	0	0	0	0
ZK757.3a.2	WBGene00006449	alg-4	4	1	2	1	0	4	1	3	1	6	1	3	0	0	0	0	0	0	0	0	0	0	0	0	0.070246	0.0169321	0.0362269	0.0161051	0	0.0655033	0.015193	0.053186	0.0215827	0.0982871	0.0160303	0.047029	0	0	0	0	0	0	0	0	0	0	0
ZK757.3b.1	WBGene00006449	alg-4	4	1	2	1	0	4	1	3	1	6	1	3	0	0	0	0	0	0	0	0	0	0	0	0	0.070246	0.0169321	0.0362269	0.0161051	0	0.0655033	0.015193	0.053186	0.0215827	0.0982871	0.0160303	0.047029	0	0	0	0	0	0	0	0	0	0	0
ZK757.3c.1	WBGene00006449	alg-4	0	0	1	0	0	0	0	0	0	0	0	0	0	0	0	0	0	0	0	0	0	0	0	0	0	0	0.0181134	0	0	0	0	0	0	0	0	0	0	0	0	0	0	0	0	0	0	0	0
T23D8.7.1	WBGene00011945	alg-5	69	1	0	8	0	0	3	0	0	3	0	0	0	0	0	0	0	0	0	2	0	0	0	0	1.21174	0.0169321	0	0.128841	0	0	0.0455791	0	0	0.0491436	0	0	0	0	0	0	0	0	0	0.582857	0	0	0
T26A5.4.1	WBGene00020820	algn-1	376	373	382	354	289	306	321	338	274	283	415	372	33	86	22	0	29	0	25	20	18	28	19	26	6.60312	6.31567	6.91933	5.70121	5.08141	5.01101	4.87697	5.99229	5.91366	4.63588	6.65255	5.83159	4.61769	7.78754	4.77497	0	9.71076	0	4.03734	5.82857	4.08421	6.51763	7.77138
T24D1.4.1	WBGene00007043	algn-10	115	138	96	152	155	186	191	174	120	165	180	124	11	33	5	0	35	31	0	7	22	12	3	11	2.01957	2.33663	1.73889	2.44798	2.72533	3.04591	2.90187	3.08479	2.58992	2.7029	2.88545	1.94386	1.53923	2.98824	1.08522	0	11.7199	8.46883	0	2.04	4.99182	2.79327	1.22706
B0361.8.1	WBGene00015162	algn-11	567	677	559	593	668	679	695	661	523	639	743	641	82	149	56	51	41	113	127	53	69	77	27	45	9.95737	11.463	10.1254	9.55033	11.7453	11.1192	10.5592	11.7187	11.2877	10.4676	11.9105	10.0485	11.4743	13.4924	12.1545	13.9656	13.729	30.8703	20.5097	15.4457	15.6561	17.9235	11.0435
ZC513.5.1	WBGene00022629	algn-12	314	368	285	282	280	325	354	311	244	307	307	294	39	37	15	0	0	6	19	27	20	8	2	13	5.51431	6.23101	5.16233	4.54164	4.92317	5.32215	5.37834	5.51362	5.26618	5.02903	4.92129	4.60884	5.45727	3.35045	3.25566	0	0	1.63913	3.06837	7.86857	4.53801	1.86218	0.81804
R10D12.12.1	WBGene00011193	algn-13	37	48	56	54	36	73	72	75	45	50	86	63	40	51	27	23	2	57	10	31	4	16	6	23	0.649775	0.81274	1.01435	0.869676	0.632979	1.19544	1.0939	1.32965	0.971221	0.81906	1.3786	0.987609	5.5972	4.61819	5.86019	6.29821	0.669707	15.5717	1.61493	9.03428	0.907603	3.72436	2.45412
M02B7.4a.1	WBGene00019725	algn-14	150	160	169	171	143	175	182	145	152	135	165	166	44	90	67	15	36	33	53	5	18	29	6	2	2.63422	2.70913	3.06117	2.75397	2.51433	2.86577	2.76513	2.57066	3.28057	2.21146	2.64499	2.60227	6.15692	8.14975	14.5419	4.10753	12.0547	9.01521	8.55915	1.45714	4.08421	6.75041	2.45412
M02B7.4b.1	WBGene00019725	algn-14	150	160	169	171	143	175	182	145	152	135	165	166	44	90	62	15	36	33	53	5	18	29	6	2	2.63422	2.70913	3.06117	2.75397	2.51433	2.86577	2.76513	2.57066	3.28057	2.21146	2.64499	2.60227	6.15692	8.14975	13.4567	4.10753	12.0547	9.01521	8.55915	1.45714	4.08421	6.75041	2.45412
F09E5.2.1	WBGene00017282	algn-2	543	645	557	533	533	718	675	718	524	545	660	619	143	200	84	34	35	63	64	75	61	52	41	57	9.53589	10.9212	10.0892	8.58402	9.37161	11.7578	10.2553	12.7292	11.3093	8.92775	10.58	9.70365	20.01	18.1106	18.2317	9.31039	11.7199	17.2109	10.3356	21.8571	13.8409	12.1042	16.7698
K09E4.2a.1	WBGene00010720	algn-3	492	562	469	762	677	723	831	743	681	720	722	850	53	94	21	34	12	30	67	77	69	36	27	23	8.64025	9.51584	8.4952	12.2721	11.9035	11.8397	12.6254	13.1724	14.6978	11.7945	11.5738	13.3249	7.41628	8.51197	4.55792	9.31039	4.01824	8.19565	10.8201	22.44	15.6561	8.37981	11.0435
K09E4.2b.1	WBGene00010720	algn-3	483	552	458	751	664	705	807	726	666	704	690	832	52	88	18	34	12	30	58	77	59	20	22	19	8.4822	9.34652	8.29595	12.0949	11.6749	11.545	12.2608	12.871	14.3741	11.5324	11.0609	13.0427	7.27635	7.96865	3.90679	9.31039	4.01824	8.19565	9.36662	22.44	13.3871	4.65545	8.99844
H43I07.3a.1	WBGene00019276	algn-5	425	509	466	746	706	710	697	665	549	635	689	670	102	154	120	40	48	52	103	80	84	75	65	58	7.46363	8.61844	8.44086	12.0144	12.4134	11.6268	10.5896	11.7896	11.8489	10.4021	11.0448	10.5031	14.2728	13.9451	26.0453	10.9534	16.073	14.2058	16.6338	23.3143	19.0597	17.4579	26.5863
H43I07.3b.1	WBGene00019276	algn-5	267	322	267	455	449	451	422	416	341	397	440	384	72	96	79	11	23	27	68	31	23	44	27	34	4.68892	5.45213	4.83628	7.32783	7.89465	7.3855	6.41147	7.37513	7.3597	6.50333	7.05331	6.01971	10.075	8.69307	17.1465	3.01219	7.70163	7.37608	10.9816	9.03428	5.21872	10.242	11.0435
C08B11.8.1	WBGene00007435	algn-6	109	103	86	146	146	141	158	152	122	167	180	124	21	34	14	34	2	19	12	17	16	5	4	4	1.9142	1.74401	1.55775	2.35135	2.56708	2.30899	2.4005	2.69476	2.63309	2.73566	2.88545	1.94386	2.93853	3.0788	3.03862	9.31039	0.669707	5.19058	1.93792	4.95428	3.63041	1.16386	1.63608
Y60A3A.14.1	WBGene00013362	algn-7	267	313	285	373	377	409	472	463	340	338	404	363	64	51	16	21	8	77	62	24	30	64	21	29	4.68892	5.29975	5.16233	6.00721	6.6287	6.69772	7.17112	8.20837	7.33811	5.53684	6.47622	5.69051	8.95551	4.61819	3.4727	5.75054	2.67883	21.0355	10.0126	6.99428	6.80702	14.8974	8.58942
C08H9.3a.1	WBGene00007464	algn-8	169	206	161	237	230	233	276	276	222	212	224	242	15	30	6	27	17	26	59	0	18	39	19	5	2.96789	3.48801	2.91626	3.81691	4.04403	3.81557	4.19328	4.89311	4.79136	3.47281	3.59078	3.79367	2.09895	2.71658	1.30226	7.39355	5.69251	7.10289	9.52811	0	4.08421	9.07813	7.77138
C08H9.3b.1	WBGene00007464	algn-8	19	29	29	48	43	29	56	45	43	40	34	36	9	8	0	14	2	10	11	0	3	19	2	3	0.333668	0.491031	0.525289	0.773045	0.756058	0.474899	0.850811	0.79779	0.928056	0.655248	0.545029	0.564348	1.25937	0.724423	0	3.83369	0.669707	2.73188	1.77643	0	0.680702	4.42268	0.81804
C14A4.3.1	WBGene00007556	algn-9	534	567	508	657	622	677	693	726	582	587	634	700	50	77	8	0	42	0	36	10	44	13	16	33	9.37784	9.6005	9.20162	10.5811	10.9365	11.0864	10.5288	12.871	12.5611	9.61576	10.1632	10.9734	6.99649	6.97257	1.73635	0	14.0639	0	5.81376	2.91428	9.98363	3.02604	6.54432
F54D8.3a.1	WBGene00000107	alh-1	10105	10979	12958	10803	10134	12944	10953	12596	7876	11741	13022	16010	2934	4783	1868	1511	1330	1244	2670	1440	1665	1974	1034	1557	177.459	185.897	234.714	173.984	178.184	211.969	166.409	223.31	169.985	192.332	208.746	250.978	410.554	433.114	405.438	413.765	445.355	339.846	431.187	419.657	377.79	459.493	422.927
F54D8.3a.2	WBGene00000107	alh-1	10105	10979	12958	10803	10134	12944	10953	12596	7876	11741	13022	16010	2934	4783	1868	1511	1330	1244	2670	1440	1665	1974	1034	1557	177.459	185.897	234.714	173.984	178.184	211.969	166.409	223.31	169.985	192.332	208.746	250.978	410.554	433.114	405.438	413.765	445.355	339.846	431.187	419.657	377.79	459.493	422.927
F54D8.3b.1	WBGene00000107	alh-1	9482	10262	11986	10064	9520	12091	10247	11710	7301	11009	12102	14824	2792	4461	1807	1459	1207	1229	2525	1406	1624	1850	1018	1506	166.518	173.757	217.108	162.082	167.388	198	155.683	207.603	157.575	180.341	193.998	232.386	390.684	403.956	392.198	399.525	404.168	335.748	407.771	409.748	368.487	430.629	416.382
F54D8.3b.2	WBGene00000107	alh-1	9482	10262	11986	10064	9520	12091	10247	11710	7301	11009	12102	14824	2792	4461	1807	1459	1207	1229	2525	1406	1624	1850	1018	1506	166.518	173.757	217.108	162.082	167.388	198	155.683	207.603	157.575	180.341	193.998	232.386	390.684	403.956	392.198	399.525	404.168	335.748	407.771	409.748	368.487	430.629	416.382
F54D8.3b.3	WBGene00000107	alh-1	9482	10262	11986	10064	9520	12091	10247	11710	7301	11009	12102	14824	2792	4461	1807	1459	1207	1229	2525	1406	1624	1850	1018	1506	166.518	173.757	217.108	162.082	167.388	198	155.683	207.603	157.575	180.341	193.998	232.386	390.684	403.956	392.198	399.525	404.168	335.748	407.771	409.748	368.487	430.629	416.382
F54D8.3b.4	WBGene00000107	alh-1	9482	10262	11986	10064	9520	12091	10247	11710	7301	11009	12102	14824	2792	4461	1807	1459	1207	1229	2525	1406	1624	1850	1018	1506	166.518	173.757	217.108	162.082	167.388	198	155.683	207.603	157.575	180.341	193.998	232.386	390.684	403.956	392.198	399.525	404.168	335.748	407.771	409.748	368.487	430.629	416.382
C54D1.4.1	WBGene00000116	alh-10	609	557	592	770	770	725	807	694	595	701	753	633	161	276	147	174	58	153	164	91	186	119	66	82	10.6949	9.43118	10.7231	12.4009	13.5387	11.8725	12.2608	12.3037	12.8417	11.4832	12.0708	9.92311	22.5287	24.9926	31.9055	47.6473	19.4215	41.7978	26.4849	26.52	42.2035	27.6999	26.9953
F42G9.5a.1	WBGene00000117	alh-11	2842	2765	2774	2154	1968	2569	2621	2582	1967	2194	2205	2484	391	535	275	127	163	126	242	105	189	126	61	125	49.9098	46.8172	50.2466	34.6904	34.6029	42.0695	39.821	45.7754	42.4531	35.9403	35.3467	38.94	54.7126	48.4458	59.6871	34.7771	54.5811	34.4217	39.0814	30.6	42.8842	29.3293	24.9502
F42G9.5b.1	WBGene00000117	alh-11	2475	2375	2419	1853	1681	2204	2230	2241	1689	1858	1851	2103	292	386	199	66	123	92	180	67	139	84	37	85	43.4647	40.2137	43.8164	29.8428	29.5566	36.0923	33.8805	39.7299	36.4532	30.4363	29.672	32.9673	40.8595	34.9534	43.1918	18.0731	41.187	25.1333	29.0688	19.5257	31.5392	19.5529	15.1337
F42G9.5b.2	WBGene00000117	alh-11	2475	2375	2419	1853	1681	2204	2230	2241	1689	1858	1851	2103	292	386	199	66	123	92	180	67	139	84	37	85	43.4647	40.2137	43.8164	29.8428	29.5566	36.0923	33.8805	39.7299	36.4532	30.4363	29.672	32.9673	40.8595	34.9534	43.1918	18.0731	41.187	25.1333	29.0688	19.5257	31.5392	19.5529	15.1337
Y69F12A.2a.1	WBGene00000118	alh-12	5667	6993	5730	5027	4715	6020	4639	5039	3517	5488	5740	6009	1708	2567	749	656	482	447	1004	230	406	871	442	536	99.521	118.406	103.79	80.9604	82.9027	98.5825	70.4805	89.3348	75.9063	89.9	92.0136	94.199	239	232.449	162.566	179.636	161.399	122.115	162.139	67.0285	92.1217	202.745	180.787
Y69F12A.2a.2	WBGene00000118	alh-12	5667	6993	5730	5027	4715	6020	4639	5039	3517	5488	5740	6009	1708	2567	750	656	482	447	1004	230	406	871	442	537	99.521	118.406	103.79	80.9604	82.9027	98.5825	70.4805	89.3348	75.9063	89.9	92.0136	94.199	239	232.449	162.783	179.636	161.399	122.115	162.139	67.0285	92.1217	202.745	180.787
Y69F12A.2b.1	WBGene00000118	alh-12	5387	6657	5463	4809	4518	5731	4433	4765	3353	5256	5443	5718	1212	2048	522	417	357	270	666	171	309	556	316	350	94.6038	112.717	98.9536	77.4495	79.4389	93.8499	67.3508	84.4771	72.3668	86.0995	87.2527	89.6372	169.595	185.452	113.297	114.189	119.543	73.7608	107.555	49.8343	70.1123	129.422	129.25
Y69F12A.2b.2	WBGene00000118	alh-12	5387	6657	5463	4809	4518	5731	4433	4765	3353	5256	5443	5718	1212	2048	523	417	357	270	666	171	309	556	316	351	94.6038	112.717	98.9536	77.4495	79.4389	93.8499	67.3508	84.4771	72.3668	86.0995	87.2527	89.6372	169.595	185.452	113.514	114.189	119.543	73.7608	107.555	49.8343	70.1123	129.422	129.25
T22H6.2a.1	WBGene00011938	alh-13	1887	2106	1889	2142	1789	2312	2592	2825	1890	1992	2032	2362	211	345	173	109	121	146	292	227	181	148	70	79	33.1385	35.659	34.2163	34.4972	31.4555	37.8609	39.3804	50.0835	40.7913	32.6313	32.5735	37.0275	29.5252	31.2407	37.5486	29.848	40.5173	39.8855	47.1561	66.1542	41.069	34.4503	28.6314
T22H6.2b.1	WBGene00011938	alh-13	1887	2107	1889	2142	1789	2312	2592	2825	1890	1992	2032	2362	210	345	173	109	121	146	287	227	181	148	70	79	33.1385	35.6759	34.2163	34.4972	31.4555	37.8609	39.3804	50.0835	40.7913	32.6313	32.5735	37.0275	29.3853	31.2407	37.5486	29.848	40.5173	39.8855	46.3486	66.1542	41.069	34.4503	28.6314
K04F1.15.1	WBGene00000108	alh-2	0	3	4	0	1	1	2	5	6	2	4	8	0	3	0	0	0	0	5	0	1	0	0	0	0	0.0507963	0.0724537	0	0.0175827	0.0163758	0.0303861	0.0886433	0.129496	0.0327624	0.064121	0.125411	0	0.271658	0	0	0	0	0.807467	0	0.226901	0	0
F36H1.6.1	WBGene00000109	alh-3	2436	2617	2875	2671	2366	2958	2704	2813	2075	2729	3047	3402	660	973	749	416	318	376	602	338	523	505	303	482	42.7798	44.3113	52.0761	43.0168	41.6008	48.4397	41.082	49.8707	44.7841	44.7043	48.8442	53.3309	92.3537	88.1079	162.566	113.915	106.483	102.719	97.219	98.5028	118.669	117.55	123.933
T05H4.13a.1	WBGene00000110	alh-4	5882	6293	6894	6758	5759	6679	5520	5430	4019	5550	5589	6311	1053	2218	1336	791	493	903	789	804	758	721	512	667	103.297	106.554	124.874	108.838	101.259	109.374	83.8656	96.2667	86.7408	90.9156	89.5931	98.9333	147.346	200.846	289.971	216.604	165.083	246.689	127.418	234.308	171.991	167.829	209.418
T05H4.13a.2	WBGene00000110	alh-4	5882	6293	6894	6758	5759	6679	5520	5430	4019	5550	5589	6311	1053	2221	1336	791	493	903	789	804	758	721	512	669	103.297	106.554	124.874	108.838	101.259	109.374	83.8656	96.2667	86.7408	90.9156	89.5931	98.9333	147.346	201.118	289.971	216.604	165.083	246.689	127.418	234.308	171.991	167.829	209.418
T05H4.13b.1	WBGene00000110	alh-4	5867	6307	6908	6759	5751	6678	5520	5416	4007	5552	5551	6322	1053	2218	1336	791	493	915	789	804	758	721	512	668	103.033	106.791	125.128	108.854	101.118	109.358	83.8656	96.0185	86.4818	90.9484	88.9839	99.1057	147.346	200.846	289.971	216.604	165.083	249.967	127.418	234.308	171.991	167.829	209.418
T05H4.13b.2	WBGene00000110	alh-4	5867	6307	6908	6759	5751	6678	5520	5416	4007	5552	5551	6322	1053	2221	1336	791	493	915	789	804	758	721	512	670	103.033	106.791	125.128	108.854	101.118	109.358	83.8656	96.0185	86.4818	90.9484	88.9839	99.1057	147.346	201.118	289.971	216.604	165.083	249.967	127.418	234.308	171.991	167.829	209.418
T05H4.13c.1	WBGene00000110	alh-4	5781	6203	6810	6665	5684	6571	5448	5351	3962	5471	5485	6245	1053	2219	1336	805	493	903	789	804	758	721	512	667	101.523	105.03	123.352	107.341	99.9403	107.606	82.7717	94.8661	85.5106	89.6215	87.9259	97.8987	147.346	200.937	289.971	220.437	165.083	246.689	127.418	234.308	171.991	167.829	209.418
T05H4.13c.2	WBGene00000110	alh-4	5781	6203	6810	6665	5684	6571	5448	5351	3962	5471	5485	6245	1053	2222	1336	805	493	903	789	804	758	721	512	669	101.523	105.03	123.352	107.341	99.9403	107.606	82.7717	94.8661	85.5106	89.6215	87.9259	97.8987	147.346	201.208	289.971	220.437	165.083	246.689	127.418	234.308	171.991	167.829	209.418
T08B1.3.1	WBGene00000111	alh-5	177	215	298	278	276	318	382	415	281	356	424	480	41	104	66	53	39	102	177	56	64	83	77	130	3.10838	3.6404	5.3978	4.47722	4.85284	5.20752	5.80374	7.3574	6.06474	5.8317	6.79683	7.52464	5.73713	9.41749	14.3249	14.5133	13.0593	27.8652	28.5843	16.32	14.5216	19.3201	31.4945
F56D12.1a.1	WBGene00000112	alh-6	1741	2253	1760	2794	2617	2736	3196	2476	2671	2517	2586	2587	607	781	349	348	290	236	709	466	354	379	200	220	30.5746	38.148	31.8796	44.9977	46.0141	44.8043	48.557	43.8962	57.6474	41.2315	41.4542	40.5547	84.9374	70.7218	75.7484	95.2946	97.1076	64.4724	114.499	135.806	80.3229	88.2208	81.804
F56D12.1a.2	WBGene00000112	alh-6	1741	2253	1760	2794	2617	2736	3196	2476	2671	2517	2586	2587	607	781	349	348	290	236	709	466	354	379	200	220	30.5746	38.148	31.8796	44.9977	46.0141	44.8043	48.557	43.8962	57.6474	41.2315	41.4542	40.5547	84.9374	70.7218	75.7484	95.2946	97.1076	64.4724	114.499	135.806	80.3229	88.2208	81.804
F56D12.1a.3	WBGene00000112	alh-6	1741	2253	1760	2794	2617	2736	3196	2476	2671	2517	2586	2587	607	781	349	348	290	236	709	466	354	379	200	220	30.5746	38.148	31.8796	44.9977	46.0141	44.8043	48.557	43.8962	57.6474	41.2315	41.4542	40.5547	84.9374	70.7218	75.7484	95.2946	97.1076	64.4724	114.499	135.806	80.3229	88.2208	81.804
F56D12.1b.1	WBGene00000112	alh-6	1539	1978	1533	2451	2342	2427	2777	2176	2376	2219	2249	2285	558	737	331	331	265	224	695	466	348	363	192	201	27.0271	33.4917	27.7679	39.4736	41.1788	39.7441	42.1911	38.5776	51.2805	36.3499	36.052	35.8204	78.0809	66.7374	71.8416	90.6394	88.7362	61.1942	112.238	135.806	78.9614	84.4965	78.5318
F56D12.1b.2	WBGene00000112	alh-6	1539	1978	1533	2451	2342	2427	2777	2176	2376	2219	2249	2285	558	737	331	331	265	224	695	466	348	363	192	201	27.0271	33.4917	27.7679	39.4736	41.1788	39.7441	42.1911	38.5776	51.2805	36.3499	36.052	35.8204	78.0809	66.7374	71.8416	90.6394	88.7362	61.1942	112.238	135.806	78.9614	84.4965	78.5318
F56D12.1b.3	WBGene00000112	alh-6	1539	1978	1533	2451	2342	2427	2777	2176	2376	2219	2249	2285	558	737	331	331	265	224	695	466	348	363	192	201	27.0271	33.4917	27.7679	39.4736	41.1788	39.7441	42.1911	38.5776	51.2805	36.3499	36.052	35.8204	78.0809	66.7374	71.8416	90.6394	88.7362	61.1942	112.238	135.806	78.9614	84.4965	78.5318
F56D12.1c.1	WBGene00000112	alh-6	1283	1650	1265	2030	1903	2022	2291	1801	1968	1789	1842	1902	426	577	242	266	211	171	426	250	202	279	128	125	22.5314	27.938	22.9135	32.6934	33.46	33.1119	34.8073	31.9293	42.4747	29.306	29.5277	29.8164	59.6101	52.249	52.5246	72.8401	70.6541	46.7152	68.7962	72.8571	45.8339	64.9436	52.3546
F56D12.1c.2	WBGene00000112	alh-6	1283	1650	1265	2030	1903	2022	2291	1801	1968	1789	1842	1902	426	577	242	266	211	171	426	250	202	279	128	125	22.5314	27.938	22.9135	32.6934	33.46	33.1119	34.8073	31.9293	42.4747	29.306	29.5277	29.8164	59.6101	52.249	52.5246	72.8401	70.6541	46.7152	68.7962	72.8571	45.8339	64.9436	52.3546
F56D12.1c.3	WBGene00000112	alh-6	1283	1650	1265	2030	1903	2022	2291	1801	1968	1789	1842	1902	426	577	242	266	211	171	426	250	202	279	128	125	22.5314	27.938	22.9135	32.6934	33.46	33.1119	34.8073	31.9293	42.4747	29.306	29.5277	29.8164	59.6101	52.249	52.5246	72.8401	70.6541	46.7152	68.7962	72.8571	45.8339	64.9436	52.3546
F56D12.1d.1	WBGene00000112	alh-6	1374	1834	1448	2271	2109	2218	2603	1973	2179	2065	2079	2031	435	638	239	262	233	161	553	385	254	292	139	163	24.1295	31.0535	26.2282	36.5747	37.082	36.3216	39.5475	34.9787	47.0287	33.8272	33.3269	31.8386	60.8695	57.7727	51.8735	71.7448	78.0209	43.9833	89.3059	112.2	57.6328	67.9696	56.8538
F45H10.1a.1	WBGene00000113	alh-7	1018	1291	1120	1351	1128	1376	1825	1603	1346	1352	1322	1556	299	476	222	180	137	136	407	159	292	222	105	132	17.8776	21.8593	20.287	21.758	19.8333	22.5331	27.7273	28.4191	29.0503	22.1474	21.192	24.3924	41.839	43.1031	48.1838	49.2903	45.875	37.1536	65.7278	46.3371	66.255	51.6755	42.9471
F45H10.1a.2	WBGene00000113	alh-7	1018	1291	1120	1351	1128	1376	1825	1603	1346	1352	1322	1556	299	476	222	180	137	136	407	159	292	222	105	132	17.8776	21.8593	20.287	21.758	19.8333	22.5331	27.7273	28.4191	29.0503	22.1474	21.192	24.3924	41.839	43.1031	48.1838	49.2903	45.875	37.1536	65.7278	46.3371	66.255	51.6755	42.9471
F45H10.1b.1	WBGene00000113	alh-7	556	723	640	778	616	753	1026	935	701	727	721	857	113	252	119	93	64	72	187	76	182	114	84	75	9.76419	12.2419	11.5926	12.5298	10.831	12.331	15.5881	16.5763	15.1295	11.9091	11.5578	13.4346	15.8121	22.8193	25.8282	25.4667	21.4306	19.6696	30.1993	22.1486	41.2959	26.5361	34.3577
F13D12.4a.1	WBGene00000114	alh-8	29030	31296	31488	41011	35066	38879	45364	36918	34271	37971	38043	39279	1799	3018	645	564	588	665	1409	741	1396	1068	737	571	509.81	529.907	570.356	660.487	616.557	636.676	689.217	654.507	739.66	622.01	609.839	615.75	251.734	273.288	139.993	154.443	196.894	181.67	227.544	215.948	316.753	248.601	301.448
F13D12.4a.2	WBGene00000114	alh-8	29030	31296	31488	41011	35066	38879	45364	36918	34271	37971	38043	39279	1799	3018	645	564	588	665	1409	741	1396	1068	737	571	509.81	529.907	570.356	660.487	616.557	636.676	689.217	654.507	739.66	622.01	609.839	615.75	251.734	273.288	139.993	154.443	196.894	181.67	227.544	215.948	316.753	248.601	301.448
F13D12.4a.3	WBGene00000114	alh-8	29030	31296	31488	41011	35066	38879	45364	36918	34271	37971	38043	39279	1799	3018	645	564	588	665	1409	741	1396	1068	737	571	509.81	529.907	570.356	660.487	616.557	636.676	689.217	654.507	739.66	622.01	609.839	615.75	251.734	273.288	139.993	154.443	196.894	181.67	227.544	215.948	316.753	248.601	301.448
F13D12.4b.1	WBGene00000114	alh-8	7994	8631	8415	11458	9725	10511	12599	9887	9550	10691	10574	10916	156	345	98	49	44	116	122	151	312	168	169	100	140.387	146.141	152.424	184.532	170.992	172.126	191.417	175.283	206.115	175.131	169.504	171.123	21.8291	31.2407	21.2703	13.4179	14.7336	31.6898	19.7022	44.0057	70.793	39.1058	69.1244
F01F1.6.1	WBGene00000115	alh-9	10739	14412	9824	15192	13843	14238	16016	12884	12864	11847	11880	10199	7522	11015	5929	3785	3303	5159	6594	4571	4563	3667	1802	3130	188.593	244.025	177.946	244.669	243.398	233.159	243.332	228.416	277.64	194.068	190.439	159.883	1052.55	997.439	1286.85	1036.47	1106.02	1409.38	1064.89	1332.12	1035.35	853.577	737.054
F01F1.6.2	WBGene00000115	alh-9	10739	14412	9824	15192	13843	14238	16016	12884	12864	11847	11880	10199	7522	11015	5929	3785	3303	5159	6594	4571	4563	3667	1802	3130	188.593	244.025	177.946	244.669	243.398	233.159	243.332	228.416	277.64	194.068	190.439	159.883	1052.55	997.439	1286.85	1036.47	1106.02	1409.38	1064.89	1332.12	1035.35	853.577	737.054
Y51H7C.5.1	WBGene00021783	alkb-1	391	430	332	610	482	610	777	715	616	605	683	691	15	44	4	21	7	6	49	0	27	30	19	24	6.86654	7.2808	6.01366	9.82412	8.47489	9.98926	11.805	12.676	13.2949	9.91062	10.9487	10.8323	2.09895	3.98432	0.868176	5.75054	2.34398	1.63913	7.91318	0	6.12632	6.98318	7.77138
Y51H7C.5.2	WBGene00021783	alkb-1	391	430	332	610	482	610	777	715	616	605	683	691	15	43	4	21	7	6	49	0	27	30	19	24	6.86654	7.2808	6.01366	9.82412	8.47489	9.98926	11.805	12.676	13.2949	9.91062	10.9487	10.8323	2.09895	3.89377	0.868176	5.75054	2.34398	1.63913	7.91318	0	6.12632	6.98318	7.77138
Y46G5A.35.1	WBGene00012920	alkb-7	26	32	25	28	22	47	55	69	48	45	46	43	12	8	9	0	5	8	12	0	19	6	10	15	0.456599	0.541827	0.452836	0.450943	0.38682	0.769664	0.835618	1.22328	1.03597	0.737154	0.737392	0.674082	1.67916	0.724423	1.9534	0	1.67427	2.18551	1.93792	0	4.31111	1.39664	4.0902
C14B1.10.1	WBGene00007581	alkb-8	229	218	223	546	465	540	582	643	515	546	589	636	29	41	19	15	21	55	30	30	55	55	15	43	4.02158	3.6912	4.03929	8.79339	8.17598	8.84295	8.84235	11.3995	11.1151	8.94413	9.44182	9.97014	4.05797	3.71267	4.12384	4.10753	7.03193	15.0254	4.8448	8.74285	12.4795	12.8025	6.1353
C14B1.10.2	WBGene00007581	alkb-8	229	218	223	546	465	540	582	643	515	546	589	636	29	41	19	15	21	55	30	30	55	55	15	43	4.02158	3.6912	4.03929	8.79339	8.17598	8.84295	8.84235	11.3995	11.1151	8.94413	9.44182	9.97014	4.05797	3.71267	4.12384	4.10753	7.03193	15.0254	4.8448	8.74285	12.4795	12.8025	6.1353
R102.5a.1	WBGene00011292	allo-1	1528	1635	2094	1168	1033	1410	1424	1575	1230	1266	1395	1602	473	593	457	135	99	214	446	273	316	192	103	182	26.834	27.684	37.9295	18.8108	18.163	23.0899	21.6349	27.9227	26.5467	20.7386	22.3622	25.1135	66.1868	53.6978	99.1891	36.9677	33.1505	58.4623	72.0261	79.5599	71.7006	44.6923	42.1291
R102.5b.1	WBGene00011292	allo-1	1532	1638	2097	1170	1034	1413	1429	1579	1232	1269	1397	1605	439	524	360	101	85	150	367	244	295	177	90	174	26.9042	27.7348	37.9839	18.843	18.1806	23.1391	21.7109	27.9936	26.5899	20.7877	22.3943	25.1605	61.4292	47.4497	78.1358	27.6573	28.4626	40.9782	59.2681	71.1085	66.9357	41.2008	36.8118
T11B7.4a.1	WBGene00001132	alp-1	1686	2163	1922	2700	2435	2698	3610	3017	2871	3233	3716	3730	320	684	117	96	161	66	288	128	195	236	81	80	29.6087	36.6241	34.814	43.4838	42.814	44.182	54.8469	53.4874	61.9639	52.9604	59.5684	58.4727	44.7776	61.9381	25.3941	26.2882	53.9114	18.0304	46.5101	37.3028	44.2456	54.9343	33.1306
T11B7.4b.1	WBGene00001132	alp-1	2381	2968	2666	3841	3437	3839	4974	4247	4050	4444	5096	5067	393	810	148	96	199	129	384	136	263	277	112	109	41.8139	50.2545	48.2904	61.8597	60.4319	62.8668	75.5702	75.2937	87.4099	72.798	81.6902	79.4319	54.9924	73.3478	32.1225	26.2882	66.6359	35.2413	62.0135	39.6343	59.6749	64.478	45.8102
T11B7.4c.1	WBGene00001132	alp-1	2295	2789	2539	3633	3257	3608	4676	4009	3807	4192	4726	4786	368	697	105	54	166	101	338	121	244	227	89	79	40.3036	47.2236	45.99	58.5099	57.267	59.084	71.0427	71.0742	82.1653	68.67	75.759	75.0269	51.4942	63.1153	22.7896	14.7871	55.5857	27.592	54.5848	35.2628	55.3638	52.8394	36.4028
T11B7.4d.1	WBGene00001132	alp-1	2671	3225	3006	4072	3667	4057	5189	4419	4237	4716	5426	5415	405	835	148	96	212	129	393	150	269	293	115	114	46.9067	54.606	54.449	65.58	64.4759	66.4368	78.8367	78.343	91.4458	77.2537	86.9801	84.8873	56.6716	75.6116	32.1225	26.2882	70.989	35.2413	63.4669	43.7143	61.0363	68.2024	47.0373
T11B7.4e.1	WBGene00001132	alp-1	2404	2992	2689	3868	3455	3864	4985	4263	4067	4463	5121	5097	393	817	148	96	199	129	384	136	264	277	112	109	42.2178	50.6608	48.707	62.2946	60.7484	63.2762	75.7373	75.5773	87.7768	73.1093	82.0909	79.9022	54.9924	73.9817	32.1225	26.2882	66.6359	35.2413	62.0135	39.6343	59.9018	64.478	45.8102
R08B4.2.1	WBGene00044330	alr-1	64	68	54	46	51	60	58	47	47	65	78	60	4	10	0	0	0	0	8	0	5	11	0	0	1.12394	1.15138	0.978125	0.740835	0.89672	0.98255	0.881197	0.833247	1.01439	1.06478	1.25036	0.94058	0.55972	0.905528	0	0	0	0	1.29195	0	1.1345	2.5605	0
R10E12.1a.1	WBGene00007010	alx-1	3086	3239	3559	3104	2959	3313	3061	3053	2421	2859	3117	3030	478	677	385	205	194	299	418	350	206	264	148	177	54.1948	54.843	64.4657	49.9903	52.0274	54.2531	46.5059	54.1256	52.2517	46.8338	49.9663	47.4993	66.8865	61.3043	83.5619	56.1362	64.9616	81.6833	67.5042	102	46.7415	61.452	60.535
R10E12.1b.1	WBGene00007010	alx-1	3086	3239	3560	3104	2959	3314	3061	3054	2423	2861	3123	3030	480	682	390	205	194	299	418	350	210	264	148	177	54.1948	54.843	64.4838	49.9903	52.0274	54.2695	46.5059	54.1434	52.2949	46.8666	50.0625	47.4993	67.1663	61.757	84.6472	56.1362	64.9616	81.6833	67.5042	102	47.6491	61.452	60.535
R10E12.1b.2	WBGene00007010	alx-1	3086	3239	3560	3104	2959	3314	3061	3054	2423	2861	3123	3030	480	682	390	205	194	299	418	350	210	264	148	177	54.1948	54.843	64.4838	49.9903	52.0274	54.2695	46.5059	54.1434	52.2949	46.8666	50.0625	47.4993	67.1663	61.757	84.6472	56.1362	64.9616	81.6833	67.5042	102	47.6491	61.452	60.535
R10E12.1c.1	WBGene00007010	alx-1	3082	3234	3552	3102	2954	3309	3059	3050	2417	2858	3119	3027	474	672	390	205	192	297	408	337	206	261	145	159	54.1245	54.7584	64.3389	49.9581	51.9394	54.1876	46.4755	54.0724	52.1654	46.8174	49.9984	47.4522	66.3268	60.8515	84.6472	56.1362	64.2919	81.1369	65.8893	98.2114	46.7415	60.7537	59.3079
R10E12.1d.1	WBGene00007010	alx-1	1862	2000	2199	1906	1833	2066	1915	1930	1550	1775	1963	1915	301	456	235	71	125	178	289	179	96	187	64	109	32.6995	33.8642	39.8314	30.6963	32.2292	33.8325	29.0947	34.2163	33.4532	29.0766	31.4674	30.0202	42.1189	41.2921	51.0053	19.4423	41.8567	48.6275	46.6716	52.1657	21.7825	43.5285	26.1773
C01F6.5.1	WBGene00000120	aly-1	227	276	244	265	277	298	301	323	234	325	305	383	37	48	48	55	55	18	63	0	47	70	12	46	3.98646	4.67326	4.41968	4.26785	4.87042	4.88	4.57311	5.72636	5.05035	5.32389	4.88923	6.00403	5.17741	4.34654	10.4181	15.0609	18.417	4.91739	10.1741	0	10.6643	16.2941	4.90824
F23B2.6.1	WBGene00000121	aly-2	190	129	107	158	184	179	210	191	134	184	212	185	17	16	19	0	10	77	20	0	10	15	17	6	3.33668	2.18424	1.93814	2.54461	3.23523	2.93127	3.19054	3.38618	2.89208	3.01414	3.39841	2.90012	2.37881	1.44885	4.12384	0	3.34854	21.0355	3.22987	0	2.26901	3.49159	6.95334
M18.7a.1	WBGene00000122	aly-3	679	533	516	626	554	628	672	622	520	668	739	743	117	138	54	75	55	39	97	27	73	76	35	63	11.9243	9.02481	9.34653	10.0818	9.74084	10.284	10.2097	11.0272	11.223	10.9426	11.8464	11.6475	16.3718	12.4963	11.7204	20.5376	18.417	10.6543	15.6649	7.86857	16.5638	17.6907	14.3157
M18.7a.2	WBGene00000122	aly-3	679	533	516	626	554	628	672	622	520	668	739	743	117	138	54	75	55	39	97	27	73	76	35	63	11.9243	9.02481	9.34653	10.0818	9.74084	10.284	10.2097	11.0272	11.223	10.9426	11.8464	11.6475	16.3718	12.4963	11.7204	20.5376	18.417	10.6543	15.6649	7.86857	16.5638	17.6907	14.3157
F36A4.7.1	WBGene00000123	ama-1	2629	2356	2144	2600	2414	2634	3156	2561	2221	3006	2961	3144	85	172	48	75	41	140	184	79	106	85	49	103	46.1692	39.892	38.8352	41.8733	42.4448	43.1339	47.9493	45.4031	47.9351	49.2419	47.4656	49.2864	11.894	15.5751	10.4181	20.5376	13.729	38.2464	29.7148	23.0228	24.0515	19.7857	20.042
F36A4.7.2	WBGene00000123	ama-1	2629	2356	2144	2600	2414	2634	3156	2561	2221	3006	2961	3144	85	172	48	75	41	140	184	79	106	85	49	103	46.1692	39.892	38.8352	41.8733	42.4448	43.1339	47.9493	45.4031	47.9351	49.2419	47.4656	49.2864	11.894	15.5751	10.4181	20.5376	13.729	38.2464	29.7148	23.0228	24.0515	19.7857	20.042
F55D10.1.1	WBGene00018877	aman-1	702	907	782	801	722	880	637	888	538	740	799	809	669	792	511	313	281	656	395	206	302	370	221	287	12.3282	15.3574	14.1647	12.9002	12.6947	14.4107	9.67797	15.7431	11.6115	12.1221	12.8082	12.6821	93.6131	71.7178	110.909	85.7104	94.0939	179.211	63.7899	60.0342	68.524	86.1259	90.3934
F55D10.1.2	WBGene00018877	aman-1	702	907	782	801	722	880	637	888	538	740	799	809	669	792	511	313	281	656	395	206	302	370	221	287	12.3282	15.3574	14.1647	12.9002	12.6947	14.4107	9.67797	15.7431	11.6115	12.1221	12.8082	12.6821	93.6131	71.7178	110.909	85.7104	94.0939	179.211	63.7899	60.0342	68.524	86.1259	90.3934
F55D10.1.3	WBGene00018877	aman-1	702	907	782	801	722	880	637	888	538	740	799	809	669	794	511	313	281	656	395	206	302	370	221	287	12.3282	15.3574	14.1647	12.9002	12.6947	14.4107	9.67797	15.7431	11.6115	12.1221	12.8082	12.6821	93.6131	71.8989	110.909	85.7104	94.0939	179.211	63.7899	60.0342	68.524	86.1259	90.3934
F58H1.1.1	WBGene00010284	aman-2	3858	3772	3397	3748	3499	3404	3541	3046	2601	3609	3543	3529	288	344	151	74	132	102	209	187	162	156	109	108	67.7522	63.8679	61.5313	60.362	61.522	55.7433	53.7986	54.0015	56.1366	59.1197	56.7952	55.3218	40.2998	31.1502	32.7736	20.2638	44.2007	27.8652	33.7521	54.4971	36.7579	36.3125	44.5832
F48C1.1.1	WBGene00018594	aman-3	680	688	585	652	489	502	777	682	599	742	700	669	33	47	32	17	35	21	45	28	35	32	25	22	11.9418	11.6493	10.5964	10.5005	8.59796	8.22067	11.805	12.091	12.928	12.1548	11.2212	10.4875	4.61769	4.25598	6.94541	4.6552	11.7199	5.73695	7.2672	8.15999	7.94152	7.44872	10.2255
C34F11.3a.1	WBGene00016415	ampd-1	4819	5167	4896	4895	4280	4637	5249	5018	3726	5215	5237	5408	400	783	308	199	118	239	350	111	242	217	170	157	84.6288	87.4881	88.6833	78.8345	75.2542	75.9347	79.7483	88.9625	80.4171	85.4279	83.9504	84.7776	55.972	70.9029	66.8495	54.4932	39.5127	65.292	56.5227	32.3485	54.91	50.5117	69.5334
C34F11.3b.1	WBGene00016415	ampd-1	4830	5180	4912	4905	4289	4651	5260	5034	3741	5241	5275	5423	366	728	280	197	99	237	307	88	160	199	124	143	84.822	87.7082	88.9732	78.9956	75.4124	76.164	79.9154	89.2461	80.7408	85.8538	84.5596	85.0127	51.2143	65.9225	60.7723	53.9455	33.1505	64.7456	49.5785	25.6457	36.3041	46.3218	50.7185
C34F11.3c.1	WBGene00016415	ampd-1	4846	5198	4921	4914	4309	4657	5263	5032	3750	5247	5279	5458	368	750	293	197	107	224	321	102	174	202	127	148	85.103	88.013	89.1362	79.1405	75.7641	76.2623	79.961	89.2107	80.9351	85.9521	84.6237	85.5614	51.4942	67.9146	63.5939	53.9455	35.8293	61.1942	51.8394	29.7257	39.4807	47.0201	51.9455
C34F11.3d.1	WBGene00016415	ampd-1	4830	5201	4873	4884	4273	4652	5246	4996	3739	5260	5290	5414	393	759	295	199	110	239	343	97	228	209	154	151	84.822	88.0638	88.2667	78.6574	75.1311	76.1804	79.7027	88.5724	80.6977	86.1651	84.8	84.8716	54.9924	68.7296	64.028	54.4932	36.8339	65.292	55.3922	28.2686	51.7334	48.6495	62.9891
F58G6.1.1	WBGene00010272	amph-1	1267	1397	1349	1212	1018	1102	1548	1425	1212	1279	1301	1226	263	403	208	112	122	108	216	210	255	159	114	103	22.2504	23.6541	24.435	19.5194	17.8992	18.0462	23.5188	25.2634	26.1582	20.9515	20.8554	19.2192	36.8016	36.4928	45.1451	30.6695	40.8521	29.5043	34.8826	61.2	57.8597	37.0108	46.6283
F58G6.1.2	WBGene00010272	amph-1	1267	1397	1349	1212	1018	1102	1548	1425	1212	1279	1301	1226	263	403	208	112	122	108	216	210	255	159	114	103	22.2504	23.6541	24.435	19.5194	17.8992	18.0462	23.5188	25.2634	26.1582	20.9515	20.8554	19.2192	36.8016	36.4928	45.1451	30.6695	40.8521	29.5043	34.8826	61.2	57.8597	37.0108	46.6283
C05E11.4.1	WBGene00000133	amt-1	358	461	280	571	664	675	1997	1450	1696	742	810	730	197	399	146	150	132	288	585	378	478	229	126	137	6.28701	7.80569	5.07176	9.19602	11.6749	11.0537	30.3405	25.7066	36.6042	12.1548	12.9845	11.4437	27.5662	36.1306	31.6884	41.0753	44.2007	78.6782	94.4736	110.16	108.459	53.3049	51.5365
F49E11.3.1	WBGene00000134	amt-2	18	16	11	19	13	15	19	9	17	15	22	28	1	5	0	0	3	0	0	0	0	1	0	0	0.316107	0.270913	0.199248	0.305997	0.228576	0.245638	0.288668	0.159558	0.366906	0.245718	0.352666	0.438937	0.13993	0.452764	0	0	1.00456	0	0	0	0	0.232773	0
M195.3.1	WBGene00000135	amt-3	54	71	65	67	44	65	70	86	57	49	68	84	4	1	0	0	2	0	10	0	0	0	0	2	0.948321	1.20218	1.17737	1.07904	0.773641	1.06443	1.06351	1.52467	1.23021	0.802678	1.09006	1.31681	0.55972	0.0905528	0	0	0.669707	0	1.61493	0	0	0	0
C05E11.5.1	WBGene00000136	amt-4	1265	1469	991	896	725	811	1284	1010	852	846	877	947	219	338	46	106	42	8	92	71	89	71	24	33	22.2153	24.8732	17.9504	14.4302	12.7475	13.2808	19.5079	17.906	18.3884	13.8585	14.0585	14.8455	30.6446	30.6069	9.98402	29.0265	14.0639	2.18551	14.8574	20.6914	20.1942	16.5269	9.81648
R13G10.2.1	WBGene00000137	amx-1	283	265	270	297	230	283	296	254	162	269	279	306	31	45	37	0	27	57	29	59	28	32	5	15	4.9699	4.487	4.89063	4.78322	4.04403	4.63436	4.49714	4.50308	3.4964	4.40654	4.47244	4.79696	4.33783	4.07488	8.03063	0	9.04105	15.5717	4.68331	17.1943	6.35322	7.44872	2.0451
B0019.1.1	WBGene00000138	amx-2	554	679	630	717	609	789	773	692	602	694	849	749	27	95	18	3	18	36	91	39	25	46	15	12	9.72907	11.4969	11.4115	11.5474	10.7079	12.9205	11.7442	12.2682	12.9928	11.3685	13.6097	11.7416	3.77811	8.60252	3.90679	0.821505	6.02737	9.83478	14.6959	11.3657	5.67252	10.7075	6.1353
F25C8.2a.1	WBGene00000139	amx-3	257	328	247	233	253	278	276	294	245	304	326	279	33	80	47	21	17	10	53	18	6	17	28	22	4.5133	5.55373	4.47402	3.75249	4.44844	4.55248	4.19328	5.21223	5.28776	4.97988	5.22586	4.3737	4.61769	7.24423	10.2011	5.75054	5.69251	2.73188	8.55915	5.24571	1.3614	3.95713	11.4526
F25C8.2b.1	WBGene00000139	amx-3	229	295	207	197	209	246	235	252	221	267	276	230	29	69	36	21	17	10	47	18	6	11	28	18	4.02158	4.99497	3.74948	3.17271	3.67479	4.02846	3.57037	4.46762	4.76977	4.37378	4.42435	3.60556	4.05797	6.24815	7.81358	5.75054	5.69251	2.73188	7.59019	5.24571	1.3614	2.5605	11.4526
C17H12.13a.1	WBGene00015938	anat-1	421	424	417	331	278	371	317	314	210	336	346	383	65	111	60	25	0	47	36	3	16	44	12	27	7.39339	7.17921	7.5533	5.33079	4.888	6.07543	4.8162	5.5668	4.53236	5.50408	5.54647	6.00403	9.09544	10.0514	13.0226	6.84588	0	12.8398	5.81376	0.874285	3.63041	10.242	4.90824
C17H12.13b.1	WBGene00015938	anat-1	380	392	380	313	253	339	296	284	194	311	321	347	65	93	57	25	0	33	32	3	13	44	12	27	6.67337	6.63738	6.8831	5.0409	4.44844	5.55141	4.49714	5.03494	4.18704	5.09455	5.14571	5.43969	9.09544	8.42141	12.3715	6.84588	0	9.01521	5.16779	0.874285	2.94971	10.242	4.90824
C17H12.13b.2	WBGene00015938	anat-1	380	392	380	313	253	339	296	284	194	311	321	347	65	93	57	25	0	33	32	3	13	44	12	27	6.67337	6.63738	6.8831	5.0409	4.44844	5.55141	4.49714	5.03494	4.18704	5.09455	5.14571	5.43969	9.09544	8.42141	12.3715	6.84588	0	9.01521	5.16779	0.874285	2.94971	10.242	4.90824
ZK973.6a.1	WBGene00000140	anc-1	44602	37540	43055	34756	37741	35423	37419	26936	30966	36515	38970	37169	516	816	492	170	177	297	357	355	356	288	263	243	783.278	635.631	779.874	559.749	663.591	580.081	568.509	477.539	668.329	598.159	624.699	582.673	72.2038	73.8911	106.786	46.552	59.2691	81.1369	57.6531	103.457	80.7767	67.0385	107.572
ZK973.6b.1	WBGene00000140	anc-1	41207	34307	39734	31137	34245	31787	33533	24100	28003	33672	35906	34000	451	727	429	141	159	251	328	338	309	256	246	205	723.656	580.889	719.719	501.465	602.121	520.539	509.468	427.261	604.38	551.587	575.582	532.995	63.1084	65.8319	93.1119	38.6107	53.2417	68.5702	52.9698	98.5028	70.1123	59.5898	100.619
ZK973.6c.1	WBGene00000140	anc-1	44624	37566	43098	34793	37770	35450	37451	26969	30986	36540	38994	37204	516	817	492	170	177	297	357	355	356	288	263	243	783.664	636.071	780.652	560.345	664.1	580.523	568.995	478.124	668.761	598.569	625.084	583.222	72.2038	73.9817	106.786	46.552	59.2691	81.1369	57.6531	103.457	80.7767	67.0385	107.572
W02G9.5a.1	WBGene00020955	angl-1	366	465	376	290	210	382	278	384	246	273	305	410	40	101	33	22	3	0	0	35	11	45	5	11	6.42751	7.87342	6.81065	4.67048	3.69238	6.25557	4.22367	6.80781	5.30934	4.47207	4.88923	6.42729	5.5972	9.14584	7.16245	6.02437	1.00456	0	0	10.2	2.49591	10.4748	2.0451
W02G9.5b.1	WBGene00020955	angl-1	360	461	371	288	206	379	275	375	243	271	302	403	40	101	33	22	3	0	0	35	11	45	5	11	6.32214	7.80569	6.72008	4.63827	3.62205	6.20644	4.17809	6.64825	5.24459	4.4393	4.84114	6.31756	5.5972	9.14584	7.16245	6.02437	1.00456	0	0	10.2	2.49591	10.4748	2.0451
W02G9.5c.1	WBGene00020955	angl-1	347	446	354	275	197	369	261	364	223	259	289	386	40	101	33	22	3	0	0	35	11	45	5	11	6.09384	7.55171	6.41215	4.42891	3.4638	6.04268	3.96539	6.45324	4.81294	4.24273	4.63274	6.05106	5.5972	9.14584	7.16245	6.02437	1.00456	0	0	10.2	2.49591	10.4748	2.0451
W02G9.5c.2	WBGene00020955	angl-1	347	446	354	275	197	369	261	364	223	259	289	386	40	101	33	22	3	0	0	35	11	45	5	11	6.09384	7.55171	6.41215	4.42891	3.4638	6.04268	3.96539	6.45324	4.81294	4.24273	4.63274	6.05106	5.5972	9.14584	7.16245	6.02437	1.00456	0	0	10.2	2.49591	10.4748	2.0451
Y49E10.19.1	WBGene00013038	ani-1	201	53	45	92	62	65	78	84	50	76	70	75	2	7	6	0	14	0	8	2	8	7	1	0	3.52986	0.897401	0.815104	1.48167	1.09013	1.06443	1.18506	1.48921	1.07913	1.24497	1.12212	1.17572	0.27986	0.63387	1.30226	0	4.68795	0	1.29195	0.582857	1.81521	1.62941	0.40902
K10B2.5.1	WBGene00019608	ani-2	110	0	1	8	1	0	5	0	0	0	0	0	6	0	0	0	0	0	0	0	0	0	0	0	1.93176	0	0.0181134	0.128841	0.0175827	0	0.0759652	0	0	0	0	0	0.839579	0	0	0	0	0	0	0	0	0	0
Y43F8C.14.1	WBGene00012835	ani-3	298	213	169	222	209	199	206	161	141	201	226	207	7	7	0	11	0	0	27	12	0	2	0	1	5.23332	3.60654	3.06117	3.57533	3.67479	3.25879	3.12977	2.85432	3.04316	3.29262	3.62284	3.245	0.979509	0.63387	0	3.01219	0	0	4.36032	3.49714	0	0.465545	0
B0303.2.1	WBGene00015124	anmt-1	76	114	88	131	108	117	155	129	136	154	156	128	4	18	23	11	0	7	40	0	20	15	14	24	1.33467	1.93026	1.59398	2.10977	1.89894	1.91597	2.35492	2.287	2.93525	2.5227	2.50072	2.00657	0.55972	1.62995	4.99201	3.01219	0	1.91232	6.45974	0	4.53801	3.49159	5.72628
B0303.2.2	WBGene00015124	anmt-1	76	114	88	131	108	117	155	129	136	154	156	128	4	18	23	11	0	7	40	0	20	15	14	24	1.33467	1.93026	1.59398	2.10977	1.89894	1.91597	2.35492	2.287	2.93525	2.5227	2.50072	2.00657	0.55972	1.62995	4.99201	3.01219	0	1.91232	6.45974	0	4.53801	3.49159	5.72628
F42A10.3.1	WBGene00018340	anmt-2	985	1247	1399	1224	1205	1349	1422	1120	1230	1541	1790	1721	162	316	87	73	55	121	203	59	113	102	66	78	17.2981	21.1143	25.3407	19.7127	21.1872	22.091	21.6045	19.8561	26.5467	25.2434	28.6942	26.979	22.6686	28.6147	18.8828	19.99	18.417	33.0558	32.7832	17.1943	25.6398	23.7428	26.9953
T07C12.9.1	WBGene00011573	anmt-3	2022	2587	2645	2451	2407	2511	2656	2067	2091	2651	3079	3131	854	1108	919	391	320	480	559	365	592	537	312	444	35.5093	43.8033	47.91	39.4736	42.3217	41.1197	40.3527	36.6452	45.1294	43.4265	49.3571	49.0826	119.5	100.333	199.463	107.07	107.153	131.13	90.2748	106.371	134.325	124.999	127.614
F56A8.1a.1	WBGene00010138	anoh-1	13	12	15	9	8	6	19	9	14	9	19	12	0	0	0	0	4	0	0	0	0	0	0	0	0.228299	0.203185	0.271701	0.144946	0.140662	0.098255	0.288668	0.159558	0.302158	0.147431	0.304575	0.188116	0	0	0	0	1.33941	0	0	0	0	0	0
F56A8.1b.1	WBGene00010138	anoh-1	13	12	15	9	8	6	19	9	14	9	19	12	0	0	0	0	4	0	0	0	0	0	0	0	0.228299	0.203185	0.271701	0.144946	0.140662	0.098255	0.288668	0.159558	0.302158	0.147431	0.304575	0.188116	0	0	0	0	1.33941	0	0	0	0	0	0
Y57G11C.37a.1	WBGene00013326	anoh-2	76	86	106	105	87	101	105	90	99	90	135	109	4	7	0	0	4	0	12	0	11	4	8	0	1.33467	1.45616	1.92002	1.69104	1.5297	1.65396	1.59527	1.59558	2.13669	1.47431	2.16408	1.70872	0.55972	0.63387	0	0	1.33941	0	1.93792	0	2.49591	0.93109	3.27216
Y57G11C.37b.1	WBGene00013326	anoh-2	77	88	109	105	87	102	107	93	100	90	137	111	4	7	0	0	4	0	12	0	11	4	8	0	1.35223	1.49002	1.97436	1.69104	1.5297	1.67034	1.62566	1.64877	2.15827	1.47431	2.19614	1.74007	0.55972	0.63387	0	0	1.33941	0	1.93792	0	2.49591	0.93109	3.27216
T07F10.1a.1	WBGene00011587	anp-1	786	842	811	577	623	704	474	494	285	488	491	607	381	568	227	77	67	112	83	52	85	115	71	72	13.8033	14.2568	14.69	9.29265	10.9541	11.5286	7.2015	8.75796	6.15107	7.99402	7.87085	9.51553	53.3133	51.434	49.269	21.0853	22.4352	30.5971	13.404	15.1543	19.2866	26.7689	29.0404
T07F10.1b.1	WBGene00011587	anp-1	786	842	811	577	623	704	473	494	285	488	491	607	381	568	227	77	67	112	83	52	85	115	71	72	13.8033	14.2568	14.69	9.29265	10.9541	11.5286	7.18631	8.75796	6.15107	7.99402	7.87085	9.51553	53.3133	51.434	49.269	21.0853	22.4352	30.5971	13.404	15.1543	19.2866	26.7689	29.0404
T27E9.1a.1	WBGene00006439	ant-1.1	56058	61545	68089	77293	69396	80832	92648	88902	68725	78432	86591	91593	5536	8788	4763	3734	3555	5542	6991	2150	3748	4364	1613	3704	984.462	1042.09	1233.33	1244.81	1220.17	1323.69	1407.61	1576.11	1483.27	1284.81	1388.08	1435.84	774.652	795.778	1033.78	1022.5	1190.4	1514.01	1129	626.571	850.424	1015.82	659.749
T27E9.1a.2	WBGene00006439	ant-1.1	56058	61545	68089	77293	69396	80832	92648	88902	68725	78432	86591	91593	5536	8781	4763	3734	3555	5542	6983	2150	3748	4364	1613	3699	984.462	1042.09	1233.33	1244.81	1220.17	1323.69	1407.61	1576.11	1483.27	1284.81	1388.08	1435.84	774.652	795.144	1033.78	1022.5	1190.4	1514.01	1127.71	626.571	850.424	1015.82	659.749
T27E9.1a.3	WBGene00006439	ant-1.1	56058	61545	68089	77293	69396	80832	92648	88902	68725	78432	86591	91593	5536	8788	4763	3734	3555	5542	6991	2150	3748	4364	1613	3704	984.462	1042.09	1233.33	1244.81	1220.17	1323.69	1407.61	1576.11	1483.27	1284.81	1388.08	1435.84	774.652	795.778	1033.78	1022.5	1190.4	1514.01	1129	626.571	850.424	1015.82	659.749
T27E9.1d.1	WBGene00006439	ant-1.1	48654	53612	58669	67445	60182	70799	81082	76901	59794	68799	75729	79143	5074	8071	4541	3410	3420	5328	6519	1814	3245	4025	1392	3515	854.437	907.763	1062.7	1086.21	1058.16	1159.39	1231.88	1363.35	1290.52	1127.01	1213.95	1240.67	710.004	730.852	985.597	933.778	1145.2	1455.55	1052.78	528.651	736.293	936.91	569.356
T27E9.1d.10	WBGene00006439	ant-1.1	48654	53612	58669	67445	60182	70799	81082	76901	59794	68799	75729	79143	5074	8071	4541	3410	3420	5328	6519	1814	3245	4025	1392	3515	854.437	907.763	1062.7	1086.21	1058.16	1159.39	1231.88	1363.35	1290.52	1127.01	1213.95	1240.67	710.004	730.852	985.597	933.778	1145.2	1455.55	1052.78	528.651	736.293	936.91	569.356
T27E9.1d.11	WBGene00006439	ant-1.1	48654	53612	58669	67445	60182	70799	81082	76901	59794	68799	75729	79143	5074	8071	4541	3410	3420	5328	6519	1814	3245	4025	1392	3515	854.437	907.763	1062.7	1086.21	1058.16	1159.39	1231.88	1363.35	1290.52	1127.01	1213.95	1240.67	710.004	730.852	985.597	933.778	1145.2	1455.55	1052.78	528.651	736.293	936.91	569.356
T27E9.1d.12	WBGene00006439	ant-1.1	48654	53612	58669	67445	60182	70799	81082	76901	59794	68799	75729	79143	5074	8071	4541	3410	3420	5328	6519	1814	3245	4025	1392	3515	854.437	907.763	1062.7	1086.21	1058.16	1159.39	1231.88	1363.35	1290.52	1127.01	1213.95	1240.67	710.004	730.852	985.597	933.778	1145.2	1455.55	1052.78	528.651	736.293	936.91	569.356
T27E9.1d.13	WBGene00006439	ant-1.1	48654	53612	58669	67445	60182	70799	81082	76901	59794	68799	75729	79143	5074	8071	4541	3410	3420	5328	6519	1814	3245	4025	1392	3515	854.437	907.763	1062.7	1086.21	1058.16	1159.39	1231.88	1363.35	1290.52	1127.01	1213.95	1240.67	710.004	730.852	985.597	933.778	1145.2	1455.55	1052.78	528.651	736.293	936.91	569.356
T27E9.1d.14	WBGene00006439	ant-1.1	48654	53612	58669	67445	60182	70799	81082	76901	59794	68799	75729	79143	5074	8071	4541	3410	3420	5328	6519	1814	3245	4025	1392	3515	854.437	907.763	1062.7	1086.21	1058.16	1159.39	1231.88	1363.35	1290.52	1127.01	1213.95	1240.67	710.004	730.852	985.597	933.778	1145.2	1455.55	1052.78	528.651	736.293	936.91	569.356
T27E9.1d.15	WBGene00006439	ant-1.1	48654	53612	58669	67445	60182	70799	81082	76901	59794	68799	75729	79143	5074	8071	4541	3410	3420	5328	6519	1814	3245	4025	1392	3515	854.437	907.763	1062.7	1086.21	1058.16	1159.39	1231.88	1363.35	1290.52	1127.01	1213.95	1240.67	710.004	730.852	985.597	933.778	1145.2	1455.55	1052.78	528.651	736.293	936.91	569.356
T27E9.1d.16	WBGene00006439	ant-1.1	48654	53612	58669	67445	60182	70799	81082	76901	59794	68799	75729	79143	5074	8071	4541	3410	3420	5328	6519	1814	3245	4025	1392	3515	854.437	907.763	1062.7	1086.21	1058.16	1159.39	1231.88	1363.35	1290.52	1127.01	1213.95	1240.67	710.004	730.852	985.597	933.778	1145.2	1455.55	1052.78	528.651	736.293	936.91	569.356
T27E9.1d.17	WBGene00006439	ant-1.1	48654	53612	58669	67445	60182	70799	81082	76901	59794	68799	75729	79143	5074	8071	4541	3410	3420	5328	6519	1814	3245	4025	1392	3515	854.437	907.763	1062.7	1086.21	1058.16	1159.39	1231.88	1363.35	1290.52	1127.01	1213.95	1240.67	710.004	730.852	985.597	933.778	1145.2	1455.55	1052.78	528.651	736.293	936.91	569.356
T27E9.1d.18	WBGene00006439	ant-1.1	48654	53612	58669	67445	60182	70799	81082	76901	59794	68799	75729	79143	5074	8071	4541	3410	3420	5328	6519	1814	3245	4025	1392	3515	854.437	907.763	1062.7	1086.21	1058.16	1159.39	1231.88	1363.35	1290.52	1127.01	1213.95	1240.67	710.004	730.852	985.597	933.778	1145.2	1455.55	1052.78	528.651	736.293	936.91	569.356
T27E9.1d.19	WBGene00006439	ant-1.1	48654	53612	58669	67445	60182	70799	81082	76901	59794	68799	75729	79143	5074	8071	4541	3410	3420	5328	6519	1814	3245	4025	1392	3515	854.437	907.763	1062.7	1086.21	1058.16	1159.39	1231.88	1363.35	1290.52	1127.01	1213.95	1240.67	710.004	730.852	985.597	933.778	1145.2	1455.55	1052.78	528.651	736.293	936.91	569.356
T27E9.1d.2	WBGene00006439	ant-1.1	48654	53612	58669	67445	60182	70799	81082	76901	59794	68799	75729	79143	5074	8071	4541	3410	3420	5328	6519	1814	3245	4025	1392	3515	854.437	907.763	1062.7	1086.21	1058.16	1159.39	1231.88	1363.35	1290.52	1127.01	1213.95	1240.67	710.004	730.852	985.597	933.778	1145.2	1455.55	1052.78	528.651	736.293	936.91	569.356
T27E9.1d.20	WBGene00006439	ant-1.1	48654	53612	58669	67445	60182	70799	81082	76901	59794	68799	75729	79143	5074	8071	4541	3410	3420	5328	6519	1814	3245	4025	1392	3515	854.437	907.763	1062.7	1086.21	1058.16	1159.39	1231.88	1363.35	1290.52	1127.01	1213.95	1240.67	710.004	730.852	985.597	933.778	1145.2	1455.55	1052.78	528.651	736.293	936.91	569.356
T27E9.1d.21	WBGene00006439	ant-1.1	48654	53612	58669	67445	60182	70799	81082	76901	59794	68799	75729	79143	5074	8071	4541	3410	3420	5328	6519	1814	3245	4025	1392	3515	854.437	907.763	1062.7	1086.21	1058.16	1159.39	1231.88	1363.35	1290.52	1127.01	1213.95	1240.67	710.004	730.852	985.597	933.778	1145.2	1455.55	1052.78	528.651	736.293	936.91	569.356
T27E9.1d.22	WBGene00006439	ant-1.1	48654	53612	58669	67445	60182	70799	81082	76901	59794	68799	75729	79143	5074	8071	4541	3410	3420	5328	6519	1814	3245	4025	1392	3515	854.437	907.763	1062.7	1086.21	1058.16	1159.39	1231.88	1363.35	1290.52	1127.01	1213.95	1240.67	710.004	730.852	985.597	933.778	1145.2	1455.55	1052.78	528.651	736.293	936.91	569.356
T27E9.1d.23	WBGene00006439	ant-1.1	48654	53612	58669	67445	60182	70799	81082	76901	59794	68799	75729	79143	5074	8071	4541	3410	3420	5328	6519	1814	3245	4025	1392	3515	854.437	907.763	1062.7	1086.21	1058.16	1159.39	1231.88	1363.35	1290.52	1127.01	1213.95	1240.67	710.004	730.852	985.597	933.778	1145.2	1455.55	1052.78	528.651	736.293	936.91	569.356
T27E9.1d.24	WBGene00006439	ant-1.1	48654	53612	58669	67445	60182	70799	81082	76901	59794	68799	75729	79143	5074	8071	4541	3410	3420	5328	6519	1814	3245	4025	1392	3515	854.437	907.763	1062.7	1086.21	1058.16	1159.39	1231.88	1363.35	1290.52	1127.01	1213.95	1240.67	710.004	730.852	985.597	933.778	1145.2	1455.55	1052.78	528.651	736.293	936.91	569.356
T27E9.1d.25	WBGene00006439	ant-1.1	48654	53612	58669	67445	60182	70799	81082	76901	59794	68799	75729	79143	5074	8071	4541	3410	3420	5328	6519	1814	3245	4025	1392	3515	854.437	907.763	1062.7	1086.21	1058.16	1159.39	1231.88	1363.35	1290.52	1127.01	1213.95	1240.67	710.004	730.852	985.597	933.778	1145.2	1455.55	1052.78	528.651	736.293	936.91	569.356
T27E9.1d.26	WBGene00006439	ant-1.1	48654	53612	58669	67445	60182	70799	81082	76901	59794	68799	75729	79143	5074	8071	4541	3410	3420	5328	6519	1814	3245	4025	1392	3515	854.437	907.763	1062.7	1086.21	1058.16	1159.39	1231.88	1363.35	1290.52	1127.01	1213.95	1240.67	710.004	730.852	985.597	933.778	1145.2	1455.55	1052.78	528.651	736.293	936.91	569.356
T27E9.1d.27	WBGene00006439	ant-1.1	48654	53612	58669	67445	60182	70799	81082	76901	59794	68799	75729	79143	5074	8071	4541	3410	3420	5328	6519	1814	3245	4025	1392	3515	854.437	907.763	1062.7	1086.21	1058.16	1159.39	1231.88	1363.35	1290.52	1127.01	1213.95	1240.67	710.004	730.852	985.597	933.778	1145.2	1455.55	1052.78	528.651	736.293	936.91	569.356
T27E9.1d.28	WBGene00006439	ant-1.1	48654	53612	58669	67445	60182	70799	81082	76901	59794	68799	75729	79143	5074	8071	4541	3410	3420	5328	6519	1814	3245	4025	1392	3515	854.437	907.763	1062.7	1086.21	1058.16	1159.39	1231.88	1363.35	1290.52	1127.01	1213.95	1240.67	710.004	730.852	985.597	933.778	1145.2	1455.55	1052.78	528.651	736.293	936.91	569.356
T27E9.1d.29	WBGene00006439	ant-1.1	48654	53612	58669	67445	60182	70799	81082	76901	59794	68799	75729	79143	5074	8071	4541	3410	3420	5328	6519	1814	3245	4025	1392	3515	854.437	907.763	1062.7	1086.21	1058.16	1159.39	1231.88	1363.35	1290.52	1127.01	1213.95	1240.67	710.004	730.852	985.597	933.778	1145.2	1455.55	1052.78	528.651	736.293	936.91	569.356
T27E9.1d.3	WBGene00006439	ant-1.1	48654	53612	58669	67445	60182	70799	81082	76901	59794	68799	75729	79143	5074	8071	4541	3410	3420	5328	6519	1814	3245	4025	1392	3515	854.437	907.763	1062.7	1086.21	1058.16	1159.39	1231.88	1363.35	1290.52	1127.01	1213.95	1240.67	710.004	730.852	985.597	933.778	1145.2	1455.55	1052.78	528.651	736.293	936.91	569.356
T27E9.1d.30	WBGene00006439	ant-1.1	48654	53612	58669	67445	60182	70799	81082	76901	59794	68799	75729	79143	5074	8071	4541	3410	3420	5328	6519	1814	3245	4025	1392	3515	854.437	907.763	1062.7	1086.21	1058.16	1159.39	1231.88	1363.35	1290.52	1127.01	1213.95	1240.67	710.004	730.852	985.597	933.778	1145.2	1455.55	1052.78	528.651	736.293	936.91	569.356
T27E9.1d.31	WBGene00006439	ant-1.1	48654	53612	58669	67445	60182	70799	81082	76901	59794	68799	75729	79143	5074	8071	4541	3410	3420	5328	6519	1814	3245	4025	1392	3515	854.437	907.763	1062.7	1086.21	1058.16	1159.39	1231.88	1363.35	1290.52	1127.01	1213.95	1240.67	710.004	730.852	985.597	933.778	1145.2	1455.55	1052.78	528.651	736.293	936.91	569.356
T27E9.1d.32	WBGene00006439	ant-1.1	48654	53612	58669	67445	60182	70799	81082	76901	59794	68799	75729	79143	5074	8071	4541	3410	3420	5328	6519	1814	3245	4025	1392	3515	854.437	907.763	1062.7	1086.21	1058.16	1159.39	1231.88	1363.35	1290.52	1127.01	1213.95	1240.67	710.004	730.852	985.597	933.778	1145.2	1455.55	1052.78	528.651	736.293	936.91	569.356
T27E9.1d.33	WBGene00006439	ant-1.1	48654	53612	58669	67445	60182	70799	81082	76901	59794	68799	75729	79143	5074	8071	4541	3410	3420	5328	6519	1814	3245	4025	1392	3515	854.437	907.763	1062.7	1086.21	1058.16	1159.39	1231.88	1363.35	1290.52	1127.01	1213.95	1240.67	710.004	730.852	985.597	933.778	1145.2	1455.55	1052.78	528.651	736.293	936.91	569.356
T27E9.1d.34	WBGene00006439	ant-1.1	48654	53612	58669	67445	60182	70799	81082	76901	59794	68799	75729	79143	5074	8071	4541	3410	3420	5328	6519	1814	3245	4025	1392	3515	854.437	907.763	1062.7	1086.21	1058.16	1159.39	1231.88	1363.35	1290.52	1127.01	1213.95	1240.67	710.004	730.852	985.597	933.778	1145.2	1455.55	1052.78	528.651	736.293	936.91	569.356
T27E9.1d.35	WBGene00006439	ant-1.1	48654	53612	58669	67445	60182	70799	81082	76901	59794	68799	75729	79143	5074	8071	4541	3410	3420	5328	6519	1814	3245	4025	1392	3515	854.437	907.763	1062.7	1086.21	1058.16	1159.39	1231.88	1363.35	1290.52	1127.01	1213.95	1240.67	710.004	730.852	985.597	933.778	1145.2	1455.55	1052.78	528.651	736.293	936.91	569.356
T27E9.1d.36	WBGene00006439	ant-1.1	48654	53612	58669	67445	60182	70799	81082	76901	59794	68799	75729	79143	5074	8071	4541	3410	3420	5328	6519	1814	3245	4025	1392	3515	854.437	907.763	1062.7	1086.21	1058.16	1159.39	1231.88	1363.35	1290.52	1127.01	1213.95	1240.67	710.004	730.852	985.597	933.778	1145.2	1455.55	1052.78	528.651	736.293	936.91	569.356
T27E9.1d.37	WBGene00006439	ant-1.1	48654	53612	58669	67445	60182	70799	81082	76901	59794	68799	75729	79143	5074	8071	4541	3410	3420	5328	6519	1814	3245	4025	1392	3515	854.437	907.763	1062.7	1086.21	1058.16	1159.39	1231.88	1363.35	1290.52	1127.01	1213.95	1240.67	710.004	730.852	985.597	933.778	1145.2	1455.55	1052.78	528.651	736.293	936.91	569.356
T27E9.1d.38	WBGene00006439	ant-1.1	48654	53612	58669	67445	60182	70799	81082	76901	59794	68799	75729	79143	5074	8071	4541	3410	3420	5328	6519	1814	3245	4025	1392	3515	854.437	907.763	1062.7	1086.21	1058.16	1159.39	1231.88	1363.35	1290.52	1127.01	1213.95	1240.67	710.004	730.852	985.597	933.778	1145.2	1455.55	1052.78	528.651	736.293	936.91	569.356
T27E9.1d.39	WBGene00006439	ant-1.1	48654	53612	58669	67445	60182	70799	81082	76901	59794	68799	75729	79143	5074	8071	4541	3410	3420	5328	6519	1814	3245	4025	1392	3515	854.437	907.763	1062.7	1086.21	1058.16	1159.39	1231.88	1363.35	1290.52	1127.01	1213.95	1240.67	710.004	730.852	985.597	933.778	1145.2	1455.55	1052.78	528.651	736.293	936.91	569.356
T27E9.1d.4	WBGene00006439	ant-1.1	48654	53612	58669	67445	60182	70799	81082	76901	59794	68799	75729	79143	5074	8071	4541	3410	3420	5328	6519	1814	3245	4025	1392	3515	854.437	907.763	1062.7	1086.21	1058.16	1159.39	1231.88	1363.35	1290.52	1127.01	1213.95	1240.67	710.004	730.852	985.597	933.778	1145.2	1455.55	1052.78	528.651	736.293	936.91	569.356
T27E9.1d.40	WBGene00006439	ant-1.1	48654	53612	58669	67445	60182	70799	81082	76901	59794	68799	75729	79143	5074	8071	4541	3410	3420	5328	6519	1814	3245	4025	1392	3515	854.437	907.763	1062.7	1086.21	1058.16	1159.39	1231.88	1363.35	1290.52	1127.01	1213.95	1240.67	710.004	730.852	985.597	933.778	1145.2	1455.55	1052.78	528.651	736.293	936.91	569.356
T27E9.1d.41	WBGene00006439	ant-1.1	48654	53612	58669	67445	60182	70799	81082	76901	59794	68799	75729	79143	5074	8071	4541	3410	3420	5328	6519	1814	3245	4025	1392	3515	854.437	907.763	1062.7	1086.21	1058.16	1159.39	1231.88	1363.35	1290.52	1127.01	1213.95	1240.67	710.004	730.852	985.597	933.778	1145.2	1455.55	1052.78	528.651	736.293	936.91	569.356
T27E9.1d.42	WBGene00006439	ant-1.1	48654	53612	58669	67445	60182	70799	81082	76901	59794	68799	75729	79143	5074	8071	4541	3410	3420	5328	6519	1814	3245	4025	1392	3515	854.437	907.763	1062.7	1086.21	1058.16	1159.39	1231.88	1363.35	1290.52	1127.01	1213.95	1240.67	710.004	730.852	985.597	933.778	1145.2	1455.55	1052.78	528.651	736.293	936.91	569.356
T27E9.1d.43	WBGene00006439	ant-1.1	48654	53612	58669	67445	60182	70799	81082	76901	59794	68799	75729	79143	5074	8071	4541	3410	3420	5328	6519	1814	3245	4025	1392	3515	854.437	907.763	1062.7	1086.21	1058.16	1159.39	1231.88	1363.35	1290.52	1127.01	1213.95	1240.67	710.004	730.852	985.597	933.778	1145.2	1455.55	1052.78	528.651	736.293	936.91	569.356
T27E9.1d.44	WBGene00006439	ant-1.1	48654	53612	58669	67445	60182	70799	81082	76901	59794	68799	75729	79143	5074	8071	4541	3410	3420	5328	6519	1814	3245	4025	1392	3515	854.437	907.763	1062.7	1086.21	1058.16	1159.39	1231.88	1363.35	1290.52	1127.01	1213.95	1240.67	710.004	730.852	985.597	933.778	1145.2	1455.55	1052.78	528.651	736.293	936.91	569.356
T27E9.1d.45	WBGene00006439	ant-1.1	48654	53612	58669	67445	60182	70799	81082	76901	59794	68799	75729	79143	5074	8071	4541	3410	3420	5328	6519	1814	3245	4025	1392	3515	854.437	907.763	1062.7	1086.21	1058.16	1159.39	1231.88	1363.35	1290.52	1127.01	1213.95	1240.67	710.004	730.852	985.597	933.778	1145.2	1455.55	1052.78	528.651	736.293	936.91	569.356
T27E9.1d.46	WBGene00006439	ant-1.1	48654	53612	58669	67445	60182	70799	81082	76901	59794	68799	75729	79143	5074	8071	4541	3410	3420	5328	6519	1814	3245	4025	1392	3515	854.437	907.763	1062.7	1086.21	1058.16	1159.39	1231.88	1363.35	1290.52	1127.01	1213.95	1240.67	710.004	730.852	985.597	933.778	1145.2	1455.55	1052.78	528.651	736.293	936.91	569.356
T27E9.1d.47	WBGene00006439	ant-1.1	48654	53612	58669	67445	60182	70799	81082	76901	59794	68799	75729	79143	5074	8071	4541	3410	3420	5328	6519	1814	3245	4025	1392	3515	854.437	907.763	1062.7	1086.21	1058.16	1159.39	1231.88	1363.35	1290.52	1127.01	1213.95	1240.67	710.004	730.852	985.597	933.778	1145.2	1455.55	1052.78	528.651	736.293	936.91	569.356
T27E9.1d.48	WBGene00006439	ant-1.1	48654	53612	58669	67445	60182	70799	81082	76901	59794	68799	75729	79143	5074	8071	4541	3410	3420	5328	6519	1814	3245	4025	1392	3515	854.437	907.763	1062.7	1086.21	1058.16	1159.39	1231.88	1363.35	1290.52	1127.01	1213.95	1240.67	710.004	730.852	985.597	933.778	1145.2	1455.55	1052.78	528.651	736.293	936.91	569.356
T27E9.1d.49	WBGene00006439	ant-1.1	48654	53612	58669	67445	60182	70799	81082	76901	59794	68799	75729	79143	5074	8071	4541	3410	3420	5328	6519	1814	3245	4025	1392	3515	854.437	907.763	1062.7	1086.21	1058.16	1159.39	1231.88	1363.35	1290.52	1127.01	1213.95	1240.67	710.004	730.852	985.597	933.778	1145.2	1455.55	1052.78	528.651	736.293	936.91	569.356
T27E9.1d.5	WBGene00006439	ant-1.1	48654	53612	58669	67445	60182	70799	81082	76901	59794	68799	75729	79143	5074	8071	4541	3410	3420	5328	6519	1814	3245	4025	1392	3515	854.437	907.763	1062.7	1086.21	1058.16	1159.39	1231.88	1363.35	1290.52	1127.01	1213.95	1240.67	710.004	730.852	985.597	933.778	1145.2	1455.55	1052.78	528.651	736.293	936.91	569.356
T27E9.1d.6	WBGene00006439	ant-1.1	48654	53612	58669	67445	60182	70799	81082	76901	59794	68799	75729	79143	5074	8071	4541	3410	3420	5328	6519	1814	3245	4025	1392	3515	854.437	907.763	1062.7	1086.21	1058.16	1159.39	1231.88	1363.35	1290.52	1127.01	1213.95	1240.67	710.004	730.852	985.597	933.778	1145.2	1455.55	1052.78	528.651	736.293	936.91	569.356
T27E9.1d.7	WBGene00006439	ant-1.1	48654	53612	58669	67445	60182	70799	81082	76901	59794	68799	75729	79143	5074	8064	4541	3410	3420	5328	6511	1814	3245	4025	1392	3510	854.437	907.763	1062.7	1086.21	1058.16	1159.39	1231.88	1363.35	1290.52	1127.01	1213.95	1240.67	710.004	730.218	985.597	933.778	1145.2	1455.55	1051.48	528.651	736.293	936.91	569.356
T27E9.1d.8	WBGene00006439	ant-1.1	48654	53612	58669	67445	60182	70799	81082	76901	59794	68799	75729	79143	5074	8071	4541	3410	3420	5328	6519	1814	3245	4025	1392	3515	854.437	907.763	1062.7	1086.21	1058.16	1159.39	1231.88	1363.35	1290.52	1127.01	1213.95	1240.67	710.004	730.852	985.597	933.778	1145.2	1455.55	1052.78	528.651	736.293	936.91	569.356
T27E9.1d.9	WBGene00006439	ant-1.1	48654	53612	58669	67445	60182	70799	81082	76901	59794	68799	75729	79143	5074	8071	4541	3410	3420	5328	6519	1814	3245	4025	1392	3515	854.437	907.763	1062.7	1086.21	1058.16	1159.39	1231.88	1363.35	1290.52	1127.01	1213.95	1240.67	710.004	730.852	985.597	933.778	1145.2	1455.55	1052.78	528.651	736.293	936.91	569.356
W02D3.6.1	WBGene00007057	ant-1.2	1	4	8	3	0	4	0	1	1	0	2	2	0	0	0	0	0	0	0	0	0	0	0	0	0.0175615	0.0677284	0.144907	0.0483153	0	0.0655033	0	0.0177287	0.0215827	0	0.0320605	0.0313527	0	0	0	0	0	0	0	0	0	0	0
K01H12.2.1	WBGene00010485	ant-1.3	0	1	1	0	0	4	1	1	2	0	0	0	0	0	0	0	0	0	0	0	0	0	0	0	0	0.0169321	0.0181134	0	0	0.0655033	0.015193	0.0177287	0.0431654	0	0	0	0	0	0	0	0	0	0	0	0	0	0
T01B11.4.1	WBGene00020140	ant-1.4	3	2	1	3	0	4	1	2	5	6	2	1	0	0	0	0	0	0	0	0	0	0	0	0	0.0526845	0.0338642	0.0181134	0.0483153	0	0.0655033	0.015193	0.0354573	0.107913	0.0982871	0.0320605	0.0156763	0	0	0	0	0	0	0	0	0	0	0
C08B6.9.1	WBGene00000142	aos-1	200	213	205	235	210	209	236	220	198	246	201	247	16	32	17	18	19	14	40	11	14	15	7	21	3.5123	3.60654	3.71325	3.7847	3.69238	3.42255	3.58556	3.90031	4.27337	4.02977	3.22208	3.87205	2.23888	2.89769	3.68975	4.92903	6.36222	3.82464	6.45974	3.20571	3.17661	3.49159	2.86314
T20B5.1.1	WBGene00000161	apa-2	1505	1558	1390	1517	1517	1683	1596	1437	1145	1315	1563	1422	232	330	120	166	80	51	207	60	109	153	80	112	26.43	26.3802	25.1777	24.4315	26.673	27.5605	24.2481	25.4761	24.7122	21.5413	25.0553	22.2917	32.4637	29.8824	26.0453	45.4566	26.7883	13.9326	33.4291	17.4857	24.7322	35.6142	32.7216
T20B5.1.2	WBGene00000161	apa-2	1505	1558	1390	1517	1517	1683	1596	1437	1145	1315	1563	1422	232	330	120	166	80	51	207	60	109	153	80	112	26.43	26.3802	25.1777	24.4315	26.673	27.5605	24.2481	25.4761	24.7122	21.5413	25.0553	22.2917	32.4637	29.8824	26.0453	45.4566	26.7883	13.9326	33.4291	17.4857	24.7322	35.6142	32.7216
T20B5.1.3	WBGene00000161	apa-2	1505	1558	1390	1517	1517	1683	1596	1437	1145	1315	1563	1422	232	330	120	166	80	51	207	60	109	153	80	112	26.43	26.3802	25.1777	24.4315	26.673	27.5605	24.2481	25.4761	24.7122	21.5413	25.0553	22.2917	32.4637	29.8824	26.0453	45.4566	26.7883	13.9326	33.4291	17.4857	24.7322	35.6142	32.7216
Y71H2B.10a.1	WBGene00000160	apb-1	1309	1513	1326	1472	1411	1635	1642	1654	1271	1487	1609	1652	281	435	225	255	205	204	326	177	286	226	116	216	22.988	25.6183	24.0184	23.7067	24.8093	26.7745	24.947	29.3232	27.4316	24.3588	25.7927	25.8973	39.3203	39.3905	48.8349	69.8279	68.645	55.7304	52.6469	51.5828	64.8936	52.6066	47.4463
Y71H2B.10b.1	WBGene00000160	apb-1	385	425	392	413	360	470	440	442	341	389	440	458	32	37	5	23	17	10	16	46	23	26	34	46	6.76117	7.19614	7.10046	6.65141	6.32979	7.69664	6.68494	7.83607	7.3597	6.37228	7.05331	7.17976	4.47776	3.35045	1.08522	6.29821	5.69251	2.73188	2.58389	13.4057	5.21872	6.05209	13.9067
Y71H2B.10c.1	WBGene00000160	apb-1	1125	1337	1166	1306	1253	1450	1477	1486	1145	1343	1426	1471	266	413	222	232	198	194	319	158	266	207	99	183	19.7567	22.6382	21.1203	21.0333	22.0312	23.745	22.4401	26.3448	24.7122	21.9999	22.8591	23.0599	37.2214	37.3983	48.1838	63.5297	66.301	52.9985	51.5164	46.0457	60.3556	48.1839	40.493
R11A5.1a.1	WBGene00000163	apb-3	947	848	971	832	663	845	915	892	687	841	877	941	38	81	21	4	31	7	26	0	31	37	21	6	16.6307	14.3584	17.5881	13.3995	11.6574	13.8376	13.9016	15.814	14.8273	13.7766	14.0585	14.7514	5.31734	7.33478	4.55792	1.09534	10.3805	1.91232	4.19883	0	7.03392	8.61259	8.58942
R11A5.1b.1	WBGene00000163	apb-3	947	848	971	832	663	845	913	891	686	841	877	939	38	81	21	4	31	7	26	0	31	37	21	6	16.6307	14.3584	17.5881	13.3995	11.6574	13.8376	13.8713	15.7962	14.8057	13.7766	14.0585	14.7201	5.31734	7.33478	4.55792	1.09534	10.3805	1.91232	4.19883	0	7.03392	8.61259	8.58942
F15H10.3a.1	WBGene00000144	apc-10	14	4	7	0	4	5	13	19	9	4	1	8	0	2	0	0	0	0	0	0	0	7	1	3	0.245861	0.0677284	0.126794	0	0.070331	0.0818792	0.19751	0.336845	0.194244	0.0655248	0.0160303	0.125411	0	0.181106	0	0	0	0	0	0	0	1.62941	0.40902
F15H10.3a.2	WBGene00000144	apc-10	14	4	7	0	4	5	13	19	9	4	1	8	0	2	0	0	0	0	0	0	0	7	1	3	0.245861	0.0677284	0.126794	0	0.070331	0.0818792	0.19751	0.336845	0.194244	0.0655248	0.0160303	0.125411	0	0.181106	0	0	0	0	0	0	0	1.62941	0.40902
F15H10.3a.3	WBGene00000144	apc-10	14	4	7	0	4	5	13	19	9	4	1	8	0	2	0	0	0	0	0	0	0	7	1	3	0.245861	0.0677284	0.126794	0	0.070331	0.0818792	0.19751	0.336845	0.194244	0.0655248	0.0160303	0.125411	0	0.181106	0	0	0	0	0	0	0	1.62941	0.40902
F15H10.3b.1	WBGene00000144	apc-10	14	4	7	0	4	5	13	19	9	4	1	8	0	2	0	0	0	0	0	0	0	7	1	3	0.245861	0.0677284	0.126794	0	0.070331	0.0818792	0.19751	0.336845	0.194244	0.0655248	0.0160303	0.125411	0	0.181106	0	0	0	0	0	0	0	1.62941	0.40902
F15H10.3c.1	WBGene00000144	apc-10	14	4	7	0	4	5	13	19	9	4	1	8	0	2	0	0	0	0	0	0	0	7	1	3	0.245861	0.0677284	0.126794	0	0.070331	0.0818792	0.19751	0.336845	0.194244	0.0655248	0.0160303	0.125411	0	0.181106	0	0	0	0	0	0	0	1.62941	0.40902
F15H10.3d.1	WBGene00000144	apc-10	14	4	7	0	4	5	13	19	9	4	1	8	0	2	0	0	0	0	0	0	0	7	1	3	0.245861	0.0677284	0.126794	0	0.070331	0.0818792	0.19751	0.336845	0.194244	0.0655248	0.0160303	0.125411	0	0.181106	0	0	0	0	0	0	0	1.62941	0.40902
F35G12.9.1	WBGene00000145	apc-11	44	57	48	55	39	61	46	64	50	38	65	53	14	16	8	0	6	17	5	9	2	24	5	7	0.772706	0.965129	0.869444	0.885781	0.685727	0.998926	0.69888	1.13463	1.07913	0.622485	1.04197	0.830845	1.95902	1.44885	1.73635	0	2.00912	4.6442	0.807467	2.62286	0.453801	5.58654	2.0451
F35G12.9.2	WBGene00000145	apc-11	44	57	48	55	39	61	46	64	50	38	65	53	12	16	3	0	6	17	5	9	0	24	5	7	0.772706	0.965129	0.869444	0.885781	0.685727	0.998926	0.69888	1.13463	1.07913	0.622485	1.04197	0.830845	1.67916	1.44885	0.651132	0	2.00912	4.6442	0.807467	2.62286	0	5.58654	2.0451
C09H10.7.1	WBGene00007501	apc-17	104	94	82	81	84	107	95	83	89	82	102	99	6	15	4	0	0	0	0	0	9	0	0	2	1.8264	1.59162	1.4853	1.30451	1.47695	1.75221	1.44334	1.47148	1.92086	1.34326	1.63509	1.55196	0.839579	1.35829	0.868176	0	0	0	0	0	2.04211	0	0
K06H7.6.1	WBGene00000143	apc-2	210	224	170	201	169	175	220	184	149	209	203	194	32	27	14	0	7	33	39	12	3	10	13	16	3.68791	3.79279	3.07928	3.23713	2.97148	2.86577	3.34247	3.26208	3.21582	3.42367	3.25414	3.04121	4.47776	2.44493	3.03862	0	2.34398	9.01521	6.29824	3.49714	0.680702	2.32773	5.31726
W09G10.4a.1	WBGene00000162	apd-3	893	876	717	857	756	767	900	776	666	774	843	834	35	68	29	52	60	20	29	30	19	35	24	42	15.6824	14.8325	12.9873	13.8021	13.2926	12.5603	13.6737	13.7574	14.3741	12.679	13.5135	13.0741	4.89755	6.15759	6.29428	14.2394	20.0912	5.46376	4.68331	8.74285	4.31111	8.14704	9.81648
W09G10.4b.1	WBGene00000162	apd-3	730	693	582	674	612	650	714	642	525	623	668	677	19	47	23	20	51	20	19	22	8	17	10	33	12.8199	11.7339	10.542	10.8548	10.7606	10.6443	10.8478	11.3818	11.3309	10.2055	10.7082	10.6129	2.65867	4.25598	4.99201	5.4767	17.0775	5.46376	3.06837	6.41142	1.81521	3.95713	4.0902
F46F3.4a.1	WBGene00000146	ape-1	1056	900	910	770	656	665	845	710	590	746	754	809	44	71	55	36	15	19	1	32	39	18	18	19	18.5449	15.2389	16.4832	12.4009	11.5343	10.8899	12.8381	12.5874	12.7338	12.2204	12.0868	12.6821	6.15692	6.42925	11.9374	9.85806	5.02281	5.19058	0.161493	9.32571	8.84913	4.18991	7.36236
F46F3.4b.1	WBGene00000146	ape-1	1038	884	881	755	643	648	834	697	581	734	737	800	44	71	55	36	15	19	1	32	37	18	18	19	18.2288	14.968	15.9579	12.1594	11.3057	10.6115	12.671	12.3569	12.5395	12.0238	11.8143	12.5411	6.15692	6.42925	11.9374	9.85806	5.02281	5.19058	0.161493	9.32571	8.39533	4.18991	7.36236
F46F3.4c.1	WBGene00000146	ape-1	713	624	590	498	435	418	551	458	378	503	494	566	21	29	38	36	4	18	1	32	28	10	7	10	12.5213	10.5656	10.6869	8.02035	7.6485	6.8451	8.37137	8.11973	8.15826	8.23974	7.91894	8.8728	2.93853	2.62603	8.24767	9.85806	1.33941	4.91739	0.161493	9.32571	6.35322	2.32773	2.86314
F46F3.4d.1	WBGene00000146	ape-1	587	526	489	425	359	360	471	369	306	422	423	465	21	26	36	12	4	10	1	32	25	10	7	7	10.3086	8.90628	8.85747	6.84467	6.31221	5.8953	7.15592	6.54188	6.6043	6.91286	6.7808	7.28949	2.93853	2.35437	7.81358	3.28602	1.33941	2.73188	0.161493	9.32571	5.67252	2.32773	2.86314
Y105E8A.9.1	WBGene00000158	apg-1	1565	1618	1547	1678	1458	1698	1722	1666	1301	1614	1725	1808	188	365	250	139	137	101	219	124	196	154	88	170	27.4837	27.3961	28.0215	27.0244	25.6356	27.8062	26.1624	29.536	28.0791	26.4392	27.6522	28.3428	26.3068	33.0518	54.261	38.0631	45.875	27.592	35.3671	36.1371	44.4725	35.847	35.9938
VF36H2L.1.1	WBGene00000147	aph-1	95	87	69	87	85	77	126	97	51	103	80	93	3	19	0	0	11	7	6	0	11	3	9	8	1.66834	1.47309	1.24983	1.40114	1.49453	1.26094	1.91432	1.71968	1.10072	1.68726	1.28242	1.4579	0.41979	1.7205	0	0	3.68339	1.91232	0.96896	0	2.49591	0.698318	3.68118
ZC434.6a.1	WBGene00000148	aph-2	415	380	382	383	387	408	512	453	363	424	435	404	47	51	18	34	24	44	66	29	22	15	11	36	7.28802	6.4342	6.91933	6.16826	6.80452	6.68134	7.77884	8.03109	7.83452	6.94562	6.97316	6.33324	6.5767	4.61819	3.90679	9.31039	8.03649	12.0203	10.6586	8.45142	4.99182	3.49159	4.49922
ZC434.6b.1	WBGene00000148	aph-2	415	380	382	383	387	408	512	453	363	424	435	404	47	51	18	34	24	44	66	29	22	15	11	36	7.28802	6.4342	6.91933	6.16826	6.80452	6.68134	7.77884	8.03109	7.83452	6.94562	6.97316	6.33324	6.5767	4.61819	3.90679	9.31039	8.03649	12.0203	10.6586	8.45142	4.99182	3.49159	4.49922
C42D8.8a.1	WBGene00000149	apl-1	10071	10514	11075	9978	9163	9494	9476	8011	6963	9713	10103	10623	1256	2060	1073	513	383	778	1031	721	723	827	434	659	176.862	178.024	200.606	160.697	161.111	155.472	143.969	142.024	150.28	159.111	161.954	166.53	175.752	186.539	232.888	140.477	128.249	212.54	166.5	210.12	164.049	192.503	177.515
C42D8.8b.1	WBGene00000149	apl-1	10071	10514	11075	9978	9163	9494	9476	8011	6963	9713	10103	10623	1220	2030	1014	506	383	763	1022	687	715	806	411	645	176.862	178.024	200.606	160.697	161.111	155.472	143.969	142.024	150.28	159.111	161.954	166.53	170.714	183.822	220.083	138.561	128.249	208.443	165.046	200.211	162.234	187.615	168.107
F55A12.7.1	WBGene00000150	apm-1	886	937	1040	1025	922	1128	1063	1243	851	1088	1082	1296	80	175	42	83	18	13	76	42	52	63	22	39	15.5595	15.8654	18.838	16.5077	16.2113	18.4719	16.1502	22.0367	18.3669	17.8227	17.3447	20.3165	11.1944	15.8467	9.11585	22.7283	6.02737	3.55145	12.2735	12.24	11.7988	14.6647	8.99844
F53H8.1.1	WBGene00000164	apm-3	268	287	268	240	222	260	266	253	166	253	246	267	17	67	0	0	3	32	39	21	10	10	5	22	4.70648	4.85951	4.8544	3.86523	3.90337	4.25772	4.04135	4.48535	3.58273	4.14444	3.94344	4.18558	2.37881	6.06704	0	0	1.00456	8.74202	6.29824	6.12	2.26901	2.32773	2.0451
T05H10.2.1	WBGene00000151	apn-1	172	198	178	165	167	164	210	160	161	186	170	193	42	48	4	7	30	15	24	1	7	19	7	30	3.02058	3.35255	3.22419	2.65734	2.93632	2.68564	3.19054	2.83659	3.47481	3.0469	2.72514	3.02553	5.87706	4.34654	0.868176	1.91685	10.0456	4.09782	3.87584	0.291428	1.5883	4.42268	2.86314
T05H10.2.2	WBGene00000151	apn-1	172	198	178	165	167	164	210	160	161	186	170	193	42	48	4	7	30	15	24	1	7	19	7	30	3.02058	3.35255	3.22419	2.65734	2.93632	2.68564	3.19054	2.83659	3.47481	3.0469	2.72514	3.02553	5.87706	4.34654	0.868176	1.91685	10.0456	4.09782	3.87584	0.291428	1.5883	4.42268	2.86314
W03G9.4.1	WBGene00000155	app-1	2563	2944	2496	2952	2522	3018	3152	2859	2222	2765	2900	2915	536	931	308	287	191	214	495	325	290	238	184	173	45.0101	49.8481	45.2111	47.5423	44.3437	49.4223	47.8885	50.6863	47.9567	45.294	46.4877	45.6965	75.0024	84.3047	66.8495	78.5907	63.9571	58.4623	79.9392	94.7142	65.8012	55.3999	75.2597
K04G2.8a.1	WBGene00000156	apr-1	618	502	524	474	500	456	605	457	412	573	552	507	18	18	21	0	6	0	42	0	0	9	1	17	10.853	8.49991	9.49144	7.63382	8.79137	7.46738	9.19179	8.102	8.89207	9.38642	8.8487	7.9479	2.51874	1.62995	4.55792	0	2.00912	0	6.78272	0	0	2.09495	0.40902
K04G2.8b.1	WBGene00000156	apr-1	618	502	524	474	500	456	605	457	412	573	552	507	18	18	21	0	6	0	42	0	0	9	1	17	10.853	8.49991	9.49144	7.63382	8.79137	7.46738	9.19179	8.102	8.89207	9.38642	8.8487	7.9479	2.51874	1.62995	4.55792	0	2.00912	0	6.78272	0	0	2.09495	0.40902
K04G2.8c.1	WBGene00000156	apr-1	425	358	378	367	367	331	433	333	311	416	415	376	18	15	17	0	6	0	34	0	0	7	1	17	7.46363	6.06169	6.84688	5.91058	6.45287	5.4204	6.57859	5.90365	6.71222	6.81458	6.65255	5.8943	2.51874	1.35829	3.68975	0	2.00912	0	5.49078	0	0	1.62941	0.40902
F29G9.3.1	WBGene00000159	aps-1	357	356	386	350	334	445	415	487	325	386	400	448	49	115	50	16	26	5	41	13	14	31	12	42	6.26945	6.02783	6.99178	5.63679	5.87264	7.28725	6.30511	8.63386	7.01437	6.32314	6.4121	7.02299	6.85656	10.4136	10.8522	4.38136	8.7062	1.36594	6.62123	3.78857	3.17661	7.21595	4.90824
F02E8.3.1	WBGene00000157	aps-2	239	276	260	241	217	281	254	280	231	200	249	258	57	184	50	83	18	57	56	0	30	36	6	49	4.1972	4.67326	4.70949	3.88133	3.81546	4.60161	3.85903	4.96403	4.9856	3.27624	3.99153	4.04449	7.976	16.6617	10.8522	22.7283	6.02737	15.5717	9.04363	0	6.80702	8.37981	2.45412
Y48G8AL.14.1	WBGene00000165	aps-3	209	272	228	240	232	306	243	240	243	305	314	338	74	54	22	28	10	34	47	19	22	30	22	21	3.67035	4.60553	4.12986	3.86523	4.0792	5.01101	3.69191	4.25488	5.24459	4.99626	5.0335	5.2986	10.3548	4.88985	4.77497	7.66738	3.34854	9.2884	7.59019	5.53714	4.99182	6.98318	8.99844
W04G3.4.1	WBGene00000166	apt-9	48	37	48	32	47	47	60	39	28	46	57	66	0	15	3	0	0	27	8	4	6	0	7	0	0.842952	0.626487	0.869444	0.515364	0.826389	0.769664	0.911583	0.691418	0.604315	0.753535	0.913724	1.03464	0	1.35829	0.651132	0	0	7.37608	1.29195	1.16571	1.3614	0	2.86314
K06A1.1.1	WBGene00019424	aptf-1	8	14	12	9	5	6	6	9	4	4	8	4	0	0	4	0	0	0	0	0	10	0	0	0	0.140492	0.237049	0.217361	0.144946	0.0879137	0.098255	0.0911583	0.159558	0.0863307	0.0655248	0.128242	0.0627053	0	0	0.868176	0	0	0	0	0	2.26901	0	0
Y62E10A.17a.1	WBGene00013383	aptf-2	47	33	31	35	27	28	37	19	25	40	42	30	0	0	0	0	0	0	0	0	0	0	0	0	0.82539	0.558759	0.561516	0.563679	0.474734	0.458523	0.562143	0.336845	0.539567	0.655248	0.673271	0.47029	0	0	0	0	0	0	0	0	0	0	0
Y62E10A.17b.1	WBGene00013383	aptf-2	47	34	31	35	27	29	37	20	26	40	42	30	0	0	0	0	0	0	0	0	0	0	0	0	0.82539	0.575691	0.561516	0.563679	0.474734	0.474899	0.562143	0.354573	0.56115	0.655248	0.673271	0.47029	0	0	0	0	0	0	0	0	0	0	0
F28C6.2.1	WBGene00009203	aptf-3	19	0	3	0	1	0	0	1	1	1	0	7	0	0	0	0	0	0	0	0	0	0	0	0	0.333668	0	0.0543403	0	0.0175827	0	0	0.0177287	0.0215827	0.0163812	0	0.109734	0	0	0	0	0	0	0	0	0	0	0
F28C6.1.1	WBGene00009202	aptf-4	20	6	14	7	5	7	8	12	5	9	10	20	0	0	0	0	0	0	0	0	0	0	0	0	0.35123	0.101593	0.253588	0.112736	0.0879137	0.114631	0.121544	0.212744	0.107913	0.147431	0.160303	0.313527	0	0	0	0	0	0	0	0	0	0	0
K08D9.3a.1	WBGene00000168	apx-1	97	90	52	71	66	88	41	38	43	36	26	58	34	57	11	10	1	34	15	0	5	15	2	0	1.70346	1.52389	0.941898	1.14346	1.16046	1.44107	0.622915	0.673689	0.928056	0.589723	0.416787	0.909227	4.75762	5.16151	2.38748	2.73835	0.334854	9.2884	2.4224	0	1.1345	3.49159	0.81804
K08D9.3e.1	WBGene00000168	apx-1	46	43	23	29	27	32	22	14	15	18	7	22	18	28	10	0	0	11	7	0	5	7	0	0	0.807829	0.72808	0.416609	0.467048	0.474734	0.524027	0.334247	0.248201	0.32374	0.294861	0.112212	0.344879	2.51874	2.53548	2.17044	0	0	3.00507	1.13045	0	1.1345	1.62941	0
F08C6.6.1	WBGene00017244	apy-1	2581	2885	2437	3354	3037	3401	4297	3980	3450	3073	3431	3424	607	1141	483	354	218	415	676	552	642	490	396	288	45.3262	48.8491	44.1424	54.0165	53.3988	55.6942	65.2845	70.5601	74.4603	50.3394	54.9998	53.6757	84.9374	103.321	104.832	96.9376	72.9981	113.373	109.17	160.868	145.67	114.059	161.972
F32A5.5a.1	WBGene00000169	aqp-1	1616	1794	2865	1201	1350	1369	1615	1859	1059	2234	2709	4257	248	386	458	100	104	153	158	175	123	167	113	259	28.3794	30.3762	51.895	19.3422	23.7367	22.4185	24.5368	32.9576	22.8561	36.5956	43.426	66.7341	34.7026	34.9534	99.4061	27.3835	34.8248	41.7978	25.516	51	27.9088	38.873	46.2193
F32A5.5b.1	WBGene00000169	aqp-1	1614	1788	2860	1199	1348	1367	1612	1856	1059	2233	2706	4256	244	382	439	100	104	153	158	175	123	167	113	259	28.3442	30.2746	51.8044	19.31	23.7015	22.3858	24.4912	32.9044	22.8561	36.5792	43.3779	66.7184	34.1429	34.5912	95.2823	27.3835	34.8248	41.7978	25.516	51	27.9088	38.873	46.2193
F32A5.5b.2	WBGene00000169	aqp-1	1614	1788	2860	1199	1348	1367	1612	1856	1059	2233	2706	4256	244	382	439	100	106	153	158	175	123	167	113	259	28.3442	30.2746	51.8044	19.31	23.7015	22.3858	24.4912	32.9044	22.8561	36.5792	43.3779	66.7184	34.1429	34.5912	95.2823	27.3835	35.4945	41.7978	25.516	51	27.9088	38.873	46.2193
ZK1321.3.1	WBGene00000178	aqp-10	1019	1113	1162	1897	1637	2250	1809	1999	1286	1616	1757	1718	127	180	45	70	57	63	120	55	144	103	47	38	17.8952	18.8454	21.0478	30.5514	28.783	36.8456	27.4842	35.4396	27.7553	26.472	28.1652	26.9319	17.7711	16.2995	9.76698	19.1685	19.0867	17.2109	19.3792	16.0286	32.6737	23.9756	19.2239
ZK525.2.1	WBGene00000179	aqp-11	929	1235	967	1189	1080	1107	1195	1220	1029	1089	1226	1040	238	457	155	199	135	92	197	126	104	63	42	116	16.3146	20.9111	17.5157	19.149	18.9894	18.128	18.1557	21.629	22.2086	17.8391	19.6531	16.3034	33.3033	41.3826	33.6418	54.4932	45.2052	25.1333	31.8142	36.72	23.5977	14.6647	17.1788
Y57A10A.35.1	WBGene00013272	aqp-12	1	1	0	3	1	2	1	1	0	0	1	0	0	0	0	0	0	0	0	0	0	0	0	0	0.0175615	0.0169321	0	0.0483153	0.0175827	0.0327517	0.015193	0.0177287	0	0	0.0160303	0	0	0	0	0	0	0	0	0	0	0	0
C01G6.1a.1	WBGene00000170	aqp-2	370	522	485	527	468	483	609	501	531	651	685	607	166	266	124	93	62	80	150	23	73	131	32	63	6.49775	8.83855	8.78501	8.48739	8.22873	7.90953	9.25257	8.88206	11.4604	10.6642	10.9807	9.51553	23.2284	24.0871	26.9135	25.4667	20.7609	21.8551	24.224	6.70285	16.5638	30.4932	13.0886
C01G6.1a.2	WBGene00000170	aqp-2	370	522	485	527	468	483	609	501	531	651	685	607	166	266	124	93	62	80	150	23	73	131	32	63	6.49775	8.83855	8.78501	8.48739	8.22873	7.90953	9.25257	8.88206	11.4604	10.6642	10.9807	9.51553	23.2284	24.0871	26.9135	25.4667	20.7609	21.8551	24.224	6.70285	16.5638	30.4932	13.0886
C01G6.1a.3	WBGene00000170	aqp-2	370	522	485	527	468	483	609	501	531	651	685	607	166	266	124	93	62	80	150	23	75	131	45	63	6.49775	8.83855	8.78501	8.48739	8.22873	7.90953	9.25257	8.88206	11.4604	10.6642	10.9807	9.51553	23.2284	24.0871	26.9135	25.4667	20.7609	21.8551	24.224	6.70285	17.0176	30.4932	18.4059
C01G6.1b.1	WBGene00000170	aqp-2	364	504	473	508	449	472	595	476	512	627	661	592	162	266	124	93	62	80	150	23	70	128	32	63	6.39238	8.53377	8.56765	8.1814	7.89465	7.72939	9.03986	8.43885	11.0503	10.271	10.596	9.28039	22.6686	24.0871	26.9135	25.4667	20.7609	21.8551	24.224	6.70285	15.883	29.7949	13.0886
C01G6.1b.2	WBGene00000170	aqp-2	364	504	473	508	449	472	595	476	512	627	661	592	162	266	124	93	62	80	150	23	72	128	45	63	6.39238	8.53377	8.56765	8.1814	7.89465	7.72939	9.03986	8.43885	11.0503	10.271	10.596	9.28039	22.6686	24.0871	26.9135	25.4667	20.7609	21.8551	24.224	6.70285	16.3369	29.7949	18.4059
Y69E1A.7a.1	WBGene00000171	aqp-3	17	21	21	21	11	17	31	28	21	20	18	25	33	23	20	9	11	11	0	0	0	11	0	0	0.298545	0.355574	0.380382	0.338207	0.19341	0.278389	0.470984	0.496403	0.453236	0.327624	0.288545	0.391908	4.61769	2.08272	4.34088	2.46452	3.68339	3.00507	0	0	0	2.5605	0
Y69E1A.7b.1	WBGene00000171	aqp-3	17	21	18	20	10	16	31	26	21	20	18	23	33	23	20	9	11	11	0	0	0	11	0	0	0.298545	0.355574	0.326042	0.322102	0.175827	0.262013	0.470984	0.460945	0.453236	0.327624	0.288545	0.360556	4.61769	2.08272	4.34088	2.46452	3.68339	3.00507	0	0	0	2.5605	0
Y69E1A.7c.1	WBGene00000171	aqp-3	17	21	21	21	11	17	31	28	21	20	18	25	33	23	20	9	11	11	0	0	0	11	0	0	0.298545	0.355574	0.380382	0.338207	0.19341	0.278389	0.470984	0.496403	0.453236	0.327624	0.288545	0.391908	4.61769	2.08272	4.34088	2.46452	3.68339	3.00507	0	0	0	2.5605	0
F40F9.9.1	WBGene00000172	aqp-4	240	234	203	455	379	354	570	541	472	409	508	387	32	25	23	28	24	32	42	23	40	32	16	14	4.21476	3.96211	3.67703	7.32783	6.66386	5.79705	8.66004	9.59121	10.187	6.69991	8.14337	6.06674	4.47776	2.26382	4.99201	7.66738	8.03649	8.74202	6.78272	6.70285	9.07603	7.44872	6.54432
C35A5.1.1	WBGene00000173	aqp-5	4	3	13	5	7	2	13	2	5	4	6	6	0	0	0	0	0	0	0	0	0	0	0	0	0.070246	0.0507963	0.235475	0.0805256	0.123079	0.0327517	0.19751	0.0354573	0.107913	0.0655248	0.0961815	0.094058	0	0	0	0	0	0	0	0	0	0	0
C32C4.2a.1	WBGene00000174	aqp-6	14	6	5	6	5	12	6	11	9	12	12	5	29	42	25	0	3	7	9	17	3	1	4	3	0.245861	0.101593	0.0905671	0.0966307	0.0879137	0.19651	0.0911583	0.195015	0.194244	0.196574	0.192363	0.0783816	4.05797	3.80322	5.4261	0	1.00456	1.91232	1.45344	4.95428	0.680702	0.232773	1.63608
C32C4.2b.1	WBGene00000174	aqp-6	14	7	9	7	6	13	7	13	9	13	12	5	30	47	35	0	3	7	9	17	7	1	4	6	0.245861	0.118525	0.163021	0.112736	0.105496	0.212886	0.106351	0.230473	0.194244	0.212955	0.192363	0.0783816	4.1979	4.25598	7.59654	0	1.00456	1.91232	1.45344	4.95428	1.5883	0.232773	1.63608
C32C4.2c.1	WBGene00000174	aqp-6	14	6	5	6	5	13	6	13	9	12	12	5	29	42	25	0	3	7	9	17	3	1	4	3	0.245861	0.101593	0.0905671	0.0966307	0.0879137	0.212886	0.0911583	0.230473	0.194244	0.196574	0.192363	0.0783816	4.05797	3.80322	5.4261	0	1.00456	1.91232	1.45344	4.95428	0.680702	0.232773	1.63608
M02F4.8.1	WBGene00000175	aqp-7	3809	4450	3928	3728	3494	3378	5442	4690	4201	3699	4363	4233	1388	3325	951	496	418	512	1277	873	1323	548	463	790	66.8917	75.3478	71.1495	60.0399	61.4341	55.3176	82.6806	83.1475	90.6689	60.594	69.94	66.3579	194.223	301.088	206.409	135.822	139.969	139.872	206.227	254.417	300.19	127.559	189.376
M02F4.8.2	WBGene00000175	aqp-7	3809	4450	3928	3728	3494	3378	5442	4690	4201	3699	4363	4233	1388	3347	958	496	427	514	1277	873	1346	553	464	790	66.8917	75.3478	71.1495	60.0399	61.4341	55.3176	82.6806	83.1475	90.6689	60.594	69.94	66.3579	194.223	303.08	207.928	135.822	142.983	140.419	206.227	254.417	305.408	128.723	189.785
K02G10.7a.1	WBGene00000176	aqp-8	280	357	262	315	276	264	321	232	272	305	404	334	129	205	79	18	55	57	57	14	70	40	28	31	4.91722	6.04476	4.74572	5.07311	4.85284	4.32322	4.87697	4.11305	5.87049	4.99626	6.47622	5.23589	18.051	18.5633	17.1465	4.92903	18.417	15.5717	9.20512	4.08	15.883	9.3109	11.4526
K02G10.7b.1	WBGene00000176	aqp-8	281	358	263	317	280	265	323	235	273	306	404	337	142	229	114	18	55	57	69	21	77	49	31	43	4.93478	6.06169	4.76383	5.10532	4.92317	4.3396	4.90735	4.16624	5.89207	5.01264	6.47622	5.28292	19.87	20.7366	24.743	4.92903	18.417	15.5717	11.143	6.12	17.4714	11.4059	12.6796
K02G10.7c.1	WBGene00000176	aqp-8	9	8	8	10	4	5	13	11	8	10	8	8	5	0	7	0	0	0	0	0	0	0	0	0	0.158053	0.135457	0.144907	0.161051	0.070331	0.0818792	0.19751	0.195015	0.172661	0.163812	0.128242	0.125411	0.699649	0	1.51931	0	0	0	0	0	0	0	0
K02G10.7d.1	WBGene00000176	aqp-8	155	199	140	163	145	162	190	132	139	168	226	158	60	118	50	10	24	5	23	13	46	23	16	21	2.72203	3.36949	2.53588	2.62513	2.5495	2.65289	2.88668	2.34018	2.99999	2.75204	3.62284	2.47686	8.39579	10.6852	10.8522	2.73835	8.03649	1.36594	3.71435	3.78857	10.4374	5.35377	6.54432
K07A1.16a.1	WBGene00000177	aqp-9	183	279	186	160	159	171	176	176	171	226	253	230	23	44	18	12	4	0	18	0	40	12	21	13	3.21375	4.72405	3.3691	2.57682	2.79566	2.80027	2.67398	3.12025	3.69064	3.70215	4.05565	3.60556	3.21839	3.98432	3.90679	3.28602	1.33941	0	2.90688	0	9.07603	2.79327	8.58942
K07A1.16b.1	WBGene00000177	aqp-9	86	115	82	61	74	73	68	74	70	87	94	95	6	13	5	0	3	0	17	0	11	1	5	5	1.51029	1.94719	1.4853	0.982412	1.30112	1.19544	1.03313	1.31192	1.51079	1.42516	1.50684	1.48925	0.839579	1.17719	1.08522	0	1.00456	0	2.74539	0	2.49591	0.232773	2.0451
ZK1320.6.1	WBGene00000180	arc-1	598	628	595	535	466	522	630	604	429	530	569	585	84	153	70	55	5	29	48	53	33	51	14	23	10.5018	10.6334	10.7775	8.61624	8.19356	8.54819	9.57162	10.7081	9.25897	8.68203	9.12121	9.17065	11.7541	13.8546	15.1931	15.0609	1.67427	7.92246	7.75168	15.4457	7.48772	11.8714	5.72628
C43H8.1.1	WBGene00016621	arch-1	185	187	190	183	145	186	165	221	128	168	234	246	11	11	15	19	6	0	9	22	7	9	8	3	3.24888	3.1663	3.44155	2.94724	2.5495	3.04591	2.50685	3.91804	2.76258	2.75204	3.75108	3.85638	1.53923	0.996081	3.25566	5.20287	2.00912	0	1.45344	6.41142	1.5883	2.09495	3.27216
F01G4.2a.1	WBGene00000181	ard-1	2075	2275	1917	3188	2649	3042	4512	4685	3288	2802	3138	3093	305	442	159	156	159	265	384	337	471	202	193	150	36.4401	38.5205	34.7234	51.3431	46.5767	49.8153	68.551	83.0588	70.9639	45.9001	50.3029	48.4869	42.6786	40.0244	34.51	42.7183	53.2417	72.3949	62.0135	98.2114	106.87	47.0201	78.9409
F01G4.2b.1	WBGene00000181	ard-1	860	995	853	1420	1174	1381	1971	2080	1467	1222	1414	1316	109	157	92	69	60	104	154	90	207	85	74	54	15.1029	16.8474	15.4508	22.8693	20.6421	22.615	29.9455	36.8756	31.6618	20.0178	22.6668	20.63	15.2524	14.2168	19.968	18.8946	20.0912	28.4116	24.87	26.2286	46.9684	19.7857	30.2675
F01G4.2b.2	WBGene00000181	ard-1	860	995	853	1420	1174	1381	1971	2080	1467	1222	1414	1316	109	157	92	69	60	104	154	90	207	85	74	54	15.1029	16.8474	15.4508	22.8693	20.6421	22.615	29.9455	36.8756	31.6618	20.0178	22.6668	20.63	15.2524	14.2168	19.968	18.8946	20.0912	28.4116	24.87	26.2286	46.9684	19.7857	30.2675
F45E4.1.1	WBGene00000190	arf-1.1	6	10	17	19	18	25	21	26	11	25	20	17	2	0	0	7	0	0	0	0	0	0	0	0	0.105369	0.169321	0.307928	0.305997	0.316489	0.409396	0.319054	0.460945	0.23741	0.40953	0.320605	0.266498	0.27986	0	0	1.91685	0	0	0	0	0	0	0
B0336.2.1	WBGene00000182	arf-1.2	1252	1367	1026	1320	1264	1513	1472	1242	959	1301	1400	1447	874	882	571	389	399	485	734	274	356	447	217	305	21.987	23.1462	18.5844	21.2587	22.2246	24.7766	22.3642	22.019	20.6978	21.3119	22.4424	22.6836	122.299	79.8676	123.932	106.522	133.607	132.496	118.536	79.8514	80.7767	104.049	88.7573
B0336.2.2	WBGene00000182	arf-1.2	1252	1367	1026	1320	1264	1513	1472	1242	959	1301	1400	1447	874	882	571	389	399	485	734	274	356	447	217	305	21.987	23.1462	18.5844	21.2587	22.2246	24.7766	22.3642	22.019	20.6978	21.3119	22.4424	22.6836	122.299	79.8676	123.932	106.522	133.607	132.496	118.536	79.8514	80.7767	104.049	88.7573
B0336.2.3	WBGene00000182	arf-1.2	1252	1367	1026	1320	1264	1513	1472	1242	959	1301	1400	1447	878	884	571	389	399	485	734	274	356	448	217	305	21.987	23.1462	18.5844	21.2587	22.2246	24.7766	22.3642	22.019	20.6978	21.3119	22.4424	22.6836	122.858	80.0487	123.932	106.522	133.607	132.496	118.536	79.8514	80.7767	104.282	88.7573
F57H12.1.1	WBGene00000183	arf-3	1634	1783	2106	1893	1831	2207	2204	2064	1570	1896	2217	2239	601	1177	595	501	219	328	670	268	410	406	176	313	28.6955	30.1899	38.1469	30.487	32.194	36.1415	33.4855	36.592	33.8848	31.0587	35.5391	35.0993	84.0979	106.581	129.141	137.191	73.333	89.6057	108.201	78.1028	93.0293	94.5057	71.9875
Y116A8C.12.1	WBGene00000184	arf-6	240	215	211	252	200	223	233	200	138	210	220	239	143	231	82	54	24	67	101	44	50	75	33	34	4.21476	3.6404	3.82193	4.05849	3.51655	3.65181	3.53998	3.54573	2.97841	3.44005	3.52666	3.74664	20.01	20.9177	17.7976	14.7871	8.03649	18.3036	16.3108	12.8228	11.345	17.4579	13.4977
F31A9.3a.1	WBGene00000185	arg-1	0	0	0	0	0	0	0	0	0	0	0	0	0	0	0	0	0	0	0	0	0	0	0	0	0	0	0	0	0	0	0	0	0	0	0	0	0	0	0	0	0	0	0	0	0	0	0
F31A9.3b.1	WBGene00000185	arg-1	0	0	0	0	0	0	0	0	0	0	0	0	0	0	0	0	0	0	0	0	0	0	0	0	0	0	0	0	0	0	0	0	0	0	0	0	0	0	0	0	0	0	0	0	0	0	0
F44G3.2.1	WBGene00009706	argk-1	200	261	236	183	141	177	397	651	349	366	365	411	41	68	60	15	15	39	44	42	17	52	12	34	3.5123	4.41928	4.27477	2.94724	2.47917	2.89852	6.03164	11.5414	7.53236	5.99552	5.85104	6.44297	5.73713	6.15759	13.0226	4.10753	5.02281	10.6543	7.10571	12.24	3.85731	12.1042	4.90824
C27A12.8.1	WBGene00016158	ari-1.1	641	740	708	624	577	695	656	634	487	692	770	826	242	349	194	53	85	96	214	77	137	133	39	105	11.2569	12.5297	12.8243	10.0496	10.1452	11.3812	9.96664	11.24	10.5108	11.3358	12.3433	12.9486	33.863	31.6029	42.1065	14.5133	28.4626	26.2261	34.5596	22.44	31.0854	30.9588	15.9518
C27A12.8.2	WBGene00016158	ari-1.1	641	740	708	624	577	695	656	634	487	692	770	826	242	349	194	53	85	96	214	77	137	133	39	105	11.2569	12.5297	12.8243	10.0496	10.1452	11.3812	9.96664	11.24	10.5108	11.3358	12.3433	12.9486	33.863	31.6029	42.1065	14.5133	28.4626	26.2261	34.5596	22.44	31.0854	30.9588	15.9518
C27A12.7a.1	WBGene00016157	ari-1.2	302	242	247	231	205	266	286	239	181	266	266	307	45	66	42	20	17	44	35	19	6	58	11	35	5.30357	4.09757	4.47402	3.72028	3.60446	4.35597	4.34521	4.23715	3.90647	4.3574	4.26405	4.81263	6.29685	5.97649	9.11585	5.4767	5.69251	12.0203	5.65227	5.53714	1.3614	13.5008	4.49922
C27A12.7a.2	WBGene00016157	ari-1.2	302	242	247	231	205	266	286	239	181	266	266	307	45	66	42	20	17	44	35	19	6	58	11	35	5.30357	4.09757	4.47402	3.72028	3.60446	4.35597	4.34521	4.23715	3.90647	4.3574	4.26405	4.81263	6.29685	5.97649	9.11585	5.4767	5.69251	12.0203	5.65227	5.53714	1.3614	13.5008	4.49922
C27A12.7a.3	WBGene00016157	ari-1.2	302	242	247	231	205	266	286	239	181	266	266	307	45	66	42	20	17	44	35	19	6	58	11	35	5.30357	4.09757	4.47402	3.72028	3.60446	4.35597	4.34521	4.23715	3.90647	4.3574	4.26405	4.81263	6.29685	5.97649	9.11585	5.4767	5.69251	12.0203	5.65227	5.53714	1.3614	13.5008	4.49922
C27A12.7b.1	WBGene00016157	ari-1.2	282	229	224	209	189	241	261	220	167	247	244	282	43	60	41	20	12	44	35	19	6	52	11	35	4.95234	3.87745	4.05741	3.36597	3.32314	3.94658	3.96539	3.90031	3.60431	4.04615	3.91138	4.42072	6.01699	5.43317	8.8988	5.4767	4.01824	12.0203	5.65227	5.53714	1.3614	12.1042	4.49922
C27A12.7b.2	WBGene00016157	ari-1.2	282	229	224	209	189	241	261	220	167	247	244	282	43	60	41	20	12	44	35	19	6	52	11	35	4.95234	3.87745	4.05741	3.36597	3.32314	3.94658	3.96539	3.90031	3.60431	4.04615	3.91138	4.42072	6.01699	5.43317	8.8988	5.4767	4.01824	12.0203	5.65227	5.53714	1.3614	12.1042	4.49922
C27A12.7b.3	WBGene00016157	ari-1.2	282	229	224	209	189	241	261	220	167	247	244	282	43	60	41	20	12	44	35	19	6	52	11	35	4.95234	3.87745	4.05741	3.36597	3.32314	3.94658	3.96539	3.90031	3.60431	4.04615	3.91138	4.42072	6.01699	5.43317	8.8988	5.4767	4.01824	12.0203	5.65227	5.53714	1.3614	12.1042	4.49922
C27A12.6.1	WBGene00016156	ari-1.3	214	192	174	159	133	195	187	222	147	193	173	201	19	54	35	5	12	11	11	0	18	10	0	7	3.75816	3.25096	3.15174	2.56071	2.33851	3.19329	2.8411	3.93576	3.17266	3.16157	2.77323	3.15094	2.65867	4.88985	7.59654	1.36918	4.01824	3.00507	1.77643	0	4.08421	2.32773	0
Y73F8A.34a.1	WBGene00013538	ari-1.4	277	220	180	234	198	205	238	164	160	246	247	225	32	24	27	0	7	10	9	0	7	7	15	21	4.86453	3.72506	3.26042	3.7686	3.48138	3.35705	3.61595	2.9075	3.45323	4.02977	3.95947	3.52717	4.47776	2.17327	5.86019	0	2.34398	2.73188	1.45344	0	1.5883	1.62941	6.1353
Y73F8A.34a.2	WBGene00013538	ari-1.4	277	220	180	234	198	205	238	164	160	246	247	225	32	24	27	0	7	10	9	0	7	7	15	21	4.86453	3.72506	3.26042	3.7686	3.48138	3.35705	3.61595	2.9075	3.45323	4.02977	3.95947	3.52717	4.47776	2.17327	5.86019	0	2.34398	2.73188	1.45344	0	1.5883	1.62941	6.1353
Y73F8A.34b.1	WBGene00013538	ari-1.4	82	67	58	65	66	57	81	54	47	70	93	70	6	4	4	0	2	0	0	0	2	6	2	0	1.44004	1.13445	1.05058	1.04683	1.16046	0.933423	1.23064	0.957348	1.01439	1.14668	1.49081	1.09734	0.839579	0.362211	0.868176	0	0.669707	0	0	0	0.453801	1.39664	0.81804
Y73F8A.34b.2	WBGene00013538	ari-1.4	82	67	58	65	66	57	81	54	47	70	93	70	6	4	4	0	2	0	0	0	2	6	2	0	1.44004	1.13445	1.05058	1.04683	1.16046	0.933423	1.23064	0.957348	1.01439	1.14668	1.49081	1.09734	0.839579	0.362211	0.868176	0	0.669707	0	0	0	0.453801	1.39664	0.81804
Y73F8A.34c.1	WBGene00013538	ari-1.4	267	213	169	218	188	197	228	155	152	230	236	213	32	24	27	0	7	10	9	0	7	7	15	21	4.68892	3.60654	3.06117	3.51091	3.30556	3.22604	3.46401	2.74794	3.28057	3.76767	3.78314	3.33906	4.47776	2.17327	5.86019	0	2.34398	2.73188	1.45344	0	1.5883	1.62941	6.1353
Y73F8A.34d.1	WBGene00013538	ari-1.4	159	134	121	140	128	132	146	101	92	149	171	131	15	17	10	0	7	0	9	0	2	7	5	12	2.79228	2.2689	2.19172	2.25472	2.25059	2.16161	2.21818	1.7906	1.98561	2.4408	2.74117	2.0536	2.09895	1.5394	2.17044	0	2.34398	0	1.45344	0	0.453801	1.62941	2.0451
T12E12.1.1	WBGene00020462	ari-2	363	446	407	378	324	324	412	405	279	429	390	393	9	42	46	24	11	18	12	13	9	17	9	14	6.37482	7.55171	7.37216	6.08773	5.69681	5.30577	6.25954	7.18011	6.02157	7.02753	6.2518	6.1608	1.25937	3.80322	9.98402	6.57204	3.68339	4.91739	1.93792	3.78857	2.04211	3.95713	3.68118
Y108G3AL.7a.1	WBGene00044689	arid-1	657	463	418	460	440	432	523	416	387	472	531	464	19	22	16	0	2	7	0	26	6	4	2	0	11.5379	7.83956	7.57141	7.40835	7.73641	7.07436	7.94596	7.37513	8.3525	7.73192	8.51206	7.27382	2.65867	1.99216	3.4727	0	0.669707	1.91232	0	7.57714	1.3614	0.93109	0.81804
Y108G3AL.7b.1	WBGene00044689	arid-1	657	463	418	460	440	432	523	416	387	472	531	464	19	22	16	0	2	7	0	26	6	4	2	0	11.5379	7.83956	7.57141	7.40835	7.73641	7.07436	7.94596	7.37513	8.3525	7.73192	8.51206	7.27382	2.65867	1.99216	3.4727	0	0.669707	1.91232	0	7.57714	1.3614	0.93109	0.81804
Y108G3AL.7c.1	WBGene00044689	arid-1	648	455	407	455	435	420	510	401	376	463	521	452	19	22	16	0	2	7	0	26	6	4	2	0	11.3798	7.7041	7.37216	7.32783	7.6485	6.87785	7.74845	7.1092	8.11509	7.58449	8.35176	7.0857	2.65867	1.99216	3.4727	0	0.669707	1.91232	0	7.57714	1.3614	0.93109	0.81804
Y108G3AL.7d.1	WBGene00044689	arid-1	648	455	407	455	435	420	510	401	376	463	521	452	19	22	16	0	2	7	0	26	6	4	2	0	11.3798	7.7041	7.37216	7.32783	7.6485	6.87785	7.74845	7.1092	8.11509	7.58449	8.35176	7.0857	2.65867	1.99216	3.4727	0	0.669707	1.91232	0	7.57714	1.3614	0.93109	0.81804
Y108G3AL.7e.1	WBGene00044689	arid-1	400	294	234	273	238	231	283	222	212	270	299	231	4	10	6	0	2	0	0	12	4	0	2	0	7.0246	4.97804	4.23854	4.3967	4.18469	3.78282	4.29963	3.93576	4.57553	4.42292	4.79305	3.62123	0.55972	0.905528	1.30226	0	0.669707	0	0	3.49714	0.907603	0	0.81804
Y108G3AL.7f.1	WBGene00044689	arid-1	400	294	234	273	238	231	283	222	212	270	299	231	4	10	6	0	2	0	0	12	4	0	2	0	7.0246	4.97804	4.23854	4.3967	4.18469	3.78282	4.29963	3.93576	4.57553	4.42292	4.79305	3.62123	0.55972	0.905528	1.30226	0	0.669707	0	0	3.49714	0.907603	0	0.81804
Y108G3AL.7g.1	WBGene00044689	arid-1	186	132	112	123	105	95	127	113	89	125	107	113	4	4	5	0	0	0	0	12	0	0	0	0	3.26644	2.23504	2.0287	1.98093	1.84619	1.5557	1.92952	2.00334	1.92086	2.04765	1.71524	1.77142	0.55972	0.362211	1.08522	0	0	0	0	3.49714	0	0	0
Y108G3AL.7h.1	WBGene00044689	arid-1	186	132	112	123	105	95	127	113	89	125	107	113	4	4	5	0	0	0	0	12	0	0	0	0	3.26644	2.23504	2.0287	1.98093	1.84619	1.5557	1.92952	2.00334	1.92086	2.04765	1.71524	1.77142	0.55972	0.362211	1.08522	0	0	0	0	3.49714	0	0	0
Y108G3AL.7i.1	WBGene00044689	arid-1	38	35	30	30	33	27	35	34	28	34	30	40	1	0	0	0	0	0	0	0	0	0	0	0	0.667337	0.592623	0.543403	0.483153	0.580231	0.442148	0.531757	0.602775	0.604315	0.55696	0.480908	0.627053	0.13993	0	0	0	0	0	0	0	0	0	0
C01C7.1a.1	WBGene00000186	ark-1	499	443	392	499	473	458	569	468	381	497	517	470	42	60	53	54	15	5	63	22	63	45	25	58	8.76318	7.50092	7.10046	8.03645	8.31664	7.50013	8.64484	8.29702	8.223	8.14145	8.28764	7.36787	5.87706	5.43317	11.5033	14.7871	5.02281	1.36594	10.1741	6.41142	14.2947	10.4748	10.2255
C01C7.1b.1	WBGene00000186	ark-1	499	443	392	499	473	458	569	468	381	497	517	470	42	60	53	54	15	5	63	22	63	45	25	58	8.76318	7.50092	7.10046	8.03645	8.31664	7.50013	8.64484	8.29702	8.223	8.14145	8.28764	7.36787	5.87706	5.43317	11.5033	14.7871	5.02281	1.36594	10.1741	6.41142	14.2947	10.4748	10.2255
F54C9.10.1	WBGene00000187	arl-1	213	243	251	227	215	297	234	289	190	268	258	287	58	97	77	9	49	77	47	58	32	29	30	52	3.7406	4.1145	4.54647	3.65586	3.78029	4.86362	3.55517	5.12359	4.10071	4.39016	4.13581	4.49911	8.11593	8.78362	16.7124	2.46452	16.4078	21.0355	7.59019	16.9028	7.26082	6.75041	12.2706
F54C9.10.2	WBGene00000187	arl-1	213	243	251	227	215	297	234	289	190	268	258	287	58	97	77	15	49	77	47	58	32	29	30	52	3.7406	4.1145	4.54647	3.65586	3.78029	4.86362	3.55517	5.12359	4.10071	4.39016	4.13581	4.49911	8.11593	8.78362	16.7124	4.10753	16.4078	21.0355	7.59019	16.9028	7.26082	6.75041	12.2706
Y37E3.5a.1	WBGene00021349	arl-13	9	14	14	5	8	17	18	11	9	24	27	25	0	0	0	0	0	0	0	0	0	0	0	0	0.158053	0.237049	0.253588	0.0805256	0.140662	0.278389	0.273475	0.195015	0.194244	0.393149	0.432817	0.391908	0	0	0	0	0	0	0	0	0	0	0
Y37E3.5b.1	WBGene00021349	arl-13	9	14	14	5	8	17	18	11	9	24	27	25	0	0	0	0	0	0	0	0	0	0	0	0	0.158053	0.237049	0.253588	0.0805256	0.140662	0.278389	0.273475	0.195015	0.194244	0.393149	0.432817	0.391908	0	0	0	0	0	0	0	0	0	0	0
Y37E3.5c.1	WBGene00021349	arl-13	6	6	8	3	3	6	12	7	2	11	20	9	0	0	0	0	0	0	0	0	0	0	0	0	0.105369	0.101593	0.144907	0.0483153	0.0527482	0.098255	0.182317	0.124101	0.0431654	0.180193	0.320605	0.141087	0	0	0	0	0	0	0	0	0	0	0
Y37E3.5d.1	WBGene00021349	arl-13	6	6	8	3	3	6	12	7	2	11	20	9	0	0	0	0	0	0	0	0	0	0	0	0	0.105369	0.101593	0.144907	0.0483153	0.0527482	0.098255	0.182317	0.124101	0.0431654	0.180193	0.320605	0.141087	0	0	0	0	0	0	0	0	0	0	0
F19H8.3.1	WBGene00000188	arl-3	74	95	123	38	26	108	49	98	55	65	54	113	2	13	0	0	0	0	1	0	1	10	0	2	1.29955	1.60855	2.22795	0.611994	0.457151	1.76859	0.744459	1.73741	1.18705	1.06478	0.865634	1.77142	0.27986	1.17719	0	0	0	0	0.161493	0	0.226901	2.32773	0
ZK632.8.1	WBGene00000189	arl-5	40	50	54	67	52	67	78	86	57	67	76	79	11	18	8	0	1	33	15	0	21	9	0	3	0.70246	0.846605	0.978125	1.07904	0.914303	1.09718	1.18506	1.52467	1.23021	1.09754	1.2183	1.23843	1.53923	1.62995	1.73635	0	0.334854	9.01521	2.4224	0	4.76491	2.09495	0
C38D4.8.1	WBGene00000193	arl-6	3	8	10	2	2	5	8	7	6	3	10	12	2	9	20	0	0	0	0	0	4	0	0	0	0.0526845	0.135457	0.181134	0.0322102	0.0351655	0.0818792	0.121544	0.124101	0.129496	0.0491436	0.160303	0.188116	0.27986	0.814975	4.34088	0	0	0	0	0	0.907603	0	0
Y57G11C.13.1	WBGene00000192	arl-8	469	488	443	439	421	515	428	384	354	393	449	478	183	425	185	107	107	92	71	23	72	113	40	66	8.23634	8.26286	8.02425	7.07014	7.40234	8.43355	6.50262	6.80781	7.64027	6.43781	7.19758	7.49328	25.6072	38.485	40.1531	29.3004	35.8293	25.1333	11.466	6.70285	16.3369	26.3033	16.3608
B0336.5a.1	WBGene00015145	arle-14	59	81	73	82	60	85	83	80	51	65	83	85	20	44	9	12	10	14	28	15	2	12	11	8	1.03613	1.3715	1.32228	1.32062	1.05496	1.39195	1.26102	1.41829	1.10072	1.06478	1.33051	1.33249	2.7986	3.98432	1.9534	3.28602	3.34854	3.82464	4.52182	4.37143	0.453801	2.79327	4.49922
B0336.5b.1	WBGene00015145	arle-14	59	81	73	82	60	85	83	80	51	65	83	85	20	44	9	12	10	14	28	15	2	12	11	8	1.03613	1.3715	1.32228	1.32062	1.05496	1.39195	1.26102	1.41829	1.10072	1.06478	1.33051	1.33249	2.7986	3.98432	1.9534	3.28602	3.34854	3.82464	4.52182	4.37143	0.453801	2.79327	4.49922
Y53F4B.22a.1	WBGene00013168	arp-1	630	691	613	867	828	890	988	826	688	817	811	912	371	443	230	142	106	215	317	197	160	231	96	166	11.0637	11.7001	11.1035	13.9631	14.5585	14.5745	15.0107	14.6439	14.8489	13.3834	13.0005	14.2968	51.914	40.1149	49.9201	38.8846	35.4945	58.7355	51.1934	57.4114	36.3041	53.7705	39.2659
Y53F4B.22a.2	WBGene00013168	arp-1	630	691	613	867	828	890	988	826	688	817	811	912	371	443	230	142	106	215	317	197	160	231	96	166	11.0637	11.7001	11.1035	13.9631	14.5585	14.5745	15.0107	14.6439	14.8489	13.3834	13.0005	14.2968	51.914	40.1149	49.9201	38.8846	35.4945	58.7355	51.1934	57.4114	36.3041	53.7705	39.2659
Y53F4B.22b.1	WBGene00013168	arp-1	342	398	351	446	433	486	528	459	385	438	446	434	181	217	91	47	41	138	143	103	60	86	57	93	6.00603	6.73897	6.35781	7.18288	7.61333	7.95866	8.02193	8.13746	8.30933	7.17496	7.14949	6.80353	25.3273	19.65	19.751	12.8702	13.729	37.7	23.0936	30.0171	13.614	20.0184	23.3141
Y53F4B.22b.2	WBGene00013168	arp-1	342	398	351	446	433	486	528	459	385	438	446	434	181	217	91	47	41	138	143	103	60	86	57	93	6.00603	6.73897	6.35781	7.18288	7.61333	7.95866	8.02193	8.13746	8.30933	7.17496	7.14949	6.80353	25.3273	19.65	19.751	12.8702	13.729	37.7	23.0936	30.0171	13.614	20.0184	23.3141
C49H3.8.1	WBGene00016793	arp-11	311	279	277	329	297	305	313	321	288	307	335	351	29	53	61	39	18	23	58	21	20	27	9	22	5.46162	4.72405	5.01742	5.29858	5.22208	4.99463	4.75542	5.6909	6.21581	5.02903	5.37013	5.50239	4.05797	4.7993	13.2397	10.6796	6.02737	6.28333	9.36662	6.12	4.53801	6.28486	3.68118
C08B11.6.1	WBGene00007434	arp-6	112	93	83	103	103	101	118	110	107	123	111	115	10	13	7	6	21	17	5	0	5	7	0	4	1.96689	1.57468	1.50341	1.65883	1.81102	1.65396	1.79278	1.95015	2.30935	2.01489	1.77936	1.80278	1.3993	1.17719	1.51931	1.64301	7.03193	4.6442	0.807467	0	1.1345	1.62941	0
F53H8.2.1	WBGene00000195	arr-1	281	298	339	269	207	265	302	293	209	297	272	314	29	50	20	0	5	0	46	1	22	29	22	8	4.93478	5.04576	6.14045	4.33228	3.63963	4.3396	4.5883	5.1945	4.51078	4.86521	4.36023	4.92237	4.05797	4.52764	4.34088	0	1.67427	0	7.4287	0.291428	4.99182	6.75041	8.99844
T04B8.3a.1	WBGene00020205	arrd-1	7	2	3	2	1	4	8	1	7	5	2	5	1	0	0	0	2	0	0	0	0	0	0	0	0.12293	0.0338642	0.0543403	0.0322102	0.0175827	0.0655033	0.121544	0.0177287	0.151079	0.081906	0.0320605	0.0783816	0.13993	0	0	0	0.669707	0	0	0	0	0	0
T04B8.3b.1	WBGene00020205	arrd-1	6	2	3	1	1	2	7	1	4	5	2	4	1	0	0	0	0	0	0	0	0	0	0	0	0.105369	0.0338642	0.0543403	0.0161051	0.0175827	0.0327517	0.106351	0.0177287	0.0863307	0.081906	0.0320605	0.0627053	0.13993	0	0	0	0	0	0	0	0	0	0
F58G1.6.1	WBGene00010268	arrd-10	160	156	108	130	101	116	168	135	155	140	182	162	23	53	38	7	11	10	31	18	20	31	15	13	2.80984	2.64141	1.95625	2.09366	1.77586	1.8996	2.55243	2.39337	3.34532	2.29337	2.91751	2.53956	3.21839	4.7993	8.24767	1.91685	3.68339	2.73188	5.0063	5.24571	4.53801	7.21595	6.1353
R06B9.1.1	WBGene00011052	arrd-11	96	94	140	57	58	70	42	73	27	66	85	130	4	8	4	0	0	8	0	0	0	0	0	0	1.6859	1.59162	2.53588	0.917991	1.0198	1.14631	0.638108	1.29419	0.582733	1.08116	1.36257	2.03792	0.55972	0.724423	0.868176	0	0	2.18551	0	0	0	0	0
R06B9.2a.1	WBGene00011053	arrd-12	6	4	9	4	5	2	5	5	5	9	7	9	0	0	0	0	0	0	0	0	0	0	0	0	0.105369	0.0677284	0.163021	0.0644205	0.0879137	0.0327517	0.0759652	0.0886433	0.107913	0.147431	0.112212	0.141087	0	0	0	0	0	0	0	0	0	0	0
R06B9.2b.1	WBGene00011053	arrd-12	6	4	8	4	5	2	5	5	5	9	7	9	0	0	0	0	0	0	0	0	0	0	0	0	0.105369	0.0677284	0.144907	0.0644205	0.0879137	0.0327517	0.0759652	0.0886433	0.107913	0.147431	0.112212	0.141087	0	0	0	0	0	0	0	0	0	0	0
R06B9.3.1	WBGene00011054	arrd-13	218	266	231	401	298	339	403	330	287	346	361	371	25	60	19	20	30	28	80	34	47	55	32	35	3.82841	4.50394	4.1842	6.45815	5.23966	5.55141	6.1228	5.85046	6.19423	5.66789	5.78692	5.81592	3.49825	5.43317	4.12384	5.4767	10.0456	7.64927	12.9195	9.90856	10.6643	12.8025	13.0886
R06B9.3.2	WBGene00011054	arrd-13	218	266	231	401	298	339	403	330	287	346	361	371	25	60	19	20	30	28	80	34	47	55	32	35	3.82841	4.50394	4.1842	6.45815	5.23966	5.55141	6.1228	5.85046	6.19423	5.66789	5.78692	5.81592	3.49825	5.43317	4.12384	5.4767	10.0456	7.64927	12.9195	9.90856	10.6643	12.8025	13.0886
R06B9.4.1	WBGene00011055	arrd-14	342	398	341	587	498	535	570	488	422	531	600	602	201	301	184	143	149	192	186	68	160	145	106	168	6.00603	6.73897	6.17668	9.4537	8.75621	8.76107	8.66004	8.65159	9.10789	8.69841	9.61815	9.43715	28.1259	27.2564	39.9361	39.1584	49.8932	52.4521	30.0378	19.8171	36.3041	33.752	43.3561
ZK643.1a.1	WBGene00014033	arrd-15	53	55	55	48	43	66	50	45	45	54	61	61	9	5	0	0	0	0	0	0	3	2	1	5	0.930759	0.931265	0.996238	0.773045	0.756058	1.08081	0.759652	0.79779	0.971221	0.884584	0.977845	0.956256	1.25937	0.452764	0	0	0	0	0	0	0.680702	0.465545	0.40902
ZK643.1b.1	WBGene00014033	arrd-15	53	55	55	48	42	65	50	45	45	53	61	60	9	5	0	0	0	0	0	0	3	2	1	5	0.930759	0.931265	0.996238	0.773045	0.738475	1.06443	0.759652	0.79779	0.971221	0.868203	0.977845	0.94058	1.25937	0.452764	0	0	0	0	0	0	0.680702	0.465545	0.40902
ZK643.1c.1	WBGene00014033	arrd-15	53	56	55	48	42	66	50	45	45	53	61	60	9	5	0	0	0	0	0	0	3	2	1	5	0.930759	0.948197	0.996238	0.773045	0.738475	1.08081	0.759652	0.79779	0.971221	0.868203	0.977845	0.94058	1.25937	0.452764	0	0	0	0	0	0	0.680702	0.465545	0.40902
ZK643.1d.1	WBGene00014033	arrd-15	53	55	55	48	42	65	50	45	46	53	61	60	9	5	0	0	0	0	0	0	3	2	1	5	0.930759	0.931265	0.996238	0.773045	0.738475	1.06443	0.759652	0.79779	0.992804	0.868203	0.977845	0.94058	1.25937	0.452764	0	0	0	0	0	0	0.680702	0.465545	0.40902
Y49E10.24a.1	WBGene00013043	arrd-16	5	2	6	4	1	6	9	12	8	4	9	15	2	0	8	0	0	0	10	0	0	0	0	0	0.0878075	0.0338642	0.108681	0.0644205	0.0175827	0.098255	0.136737	0.212744	0.172661	0.0655248	0.144272	0.235145	0.27986	0	1.73635	0	0	0	1.61493	0	0	0	0
Y49E10.24b.1	WBGene00013043	arrd-16	2	1	3	3	1	6	6	11	5	2	9	11	0	0	0	0	0	0	10	0	0	0	0	0	0.035123	0.0169321	0.0543403	0.0483153	0.0175827	0.098255	0.0911583	0.195015	0.107913	0.0327624	0.144272	0.17244	0	0	0	0	0	0	1.61493	0	0	0	0
T12D8.4.1	WBGene00011732	arrd-17	525	529	562	414	365	496	536	452	461	492	513	528	24	52	21	1	7	13	43	0	16	3	20	9	9.21978	8.95708	10.1797	6.66752	6.4177	8.12241	8.14347	8.01336	9.94962	8.05955	8.22352	8.2771	3.35832	4.70875	4.55792	0.273835	2.34398	3.55145	6.94422	0	3.63041	0.698318	8.1804
F35F10.11.1	WBGene00018060	arrd-18	216	257	251	402	400	354	435	358	317	378	434	425	64	85	40	3	81	53	12	34	33	45	9	36	3.79328	4.35155	4.54647	6.47426	7.0331	5.79705	6.60898	6.34686	6.84171	6.19209	6.95713	6.66244	8.95551	7.69699	8.68176	0.821505	27.1231	14.479	1.93792	9.90856	7.48772	10.4748	3.68118
F35F10.12.1	WBGene00018061	arrd-19	87	95	94	112	81	104	120	98	90	91	128	114	24	13	6	7	7	15	28	0	22	9	5	9	1.52785	1.60855	1.70266	1.80377	1.4242	1.70309	1.82317	1.73741	1.94244	1.49069	2.05187	1.7871	3.35832	1.17719	1.30226	1.91685	2.34398	4.09782	4.52182	0	4.99182	2.09495	2.0451
F35F10.12.2	WBGene00018061	arrd-19	87	95	94	112	81	104	120	98	90	91	128	114	24	13	6	7	7	15	28	0	22	9	5	9	1.52785	1.60855	1.70266	1.80377	1.4242	1.70309	1.82317	1.73741	1.94244	1.49069	2.05187	1.7871	3.35832	1.17719	1.30226	1.91685	2.34398	4.09782	4.52182	0	4.99182	2.09495	2.0451
Y51B9A.4.1	WBGene00013086	arrd-2	0	0	0	0	0	0	0	0	0	0	0	0	0	0	0	0	0	0	0	0	0	0	0	0	0	0	0	0	0	0	0	0	0	0	0	0	0	0	0	0	0	0	0	0	0	0	0
T20D4.6.1	WBGene00020612	arrd-22	133	124	143	194	210	187	287	198	225	209	226	194	24	24	21	12	15	49	34	34	64	30	12	29	2.33568	2.09958	2.59022	3.12439	3.69238	3.06228	4.3604	3.51028	4.8561	3.42367	3.62284	3.04121	3.35832	2.17327	4.55792	3.28602	5.02281	13.3862	5.49078	9.90856	14.5216	6.98318	4.90824
T07F12.3.1	WBGene00020323	arrd-23	25	22	19	30	21	19	25	14	21	25	20	31	4	1	0	0	0	0	0	0	0	0	1	0	0.439037	0.372506	0.344155	0.483153	0.369238	0.311141	0.379826	0.248201	0.453236	0.40953	0.320605	0.485966	0.55972	0.0905528	0	0	0	0	0	0	0	0	0.40902
F48F7.7.1	WBGene00009852	arrd-24	47	16	136	31	23	40	18	60	26	75	48	41	1	3	0	0	0	0	0	0	0	0	4	0	0.82539	0.270913	2.46343	0.499258	0.404403	0.655033	0.273475	1.06372	0.56115	1.22859	0.769452	0.642729	0.13993	0.271658	0	0	0	0	0	0	0	0	1.63608
C04C11.2.1	WBGene00007296	arrd-25	965	1049	1031	994	865	951	1055	1087	838	1155	1288	1319	149	323	214	105	47	149	189	155	131	97	41	53	16.9468	17.7618	18.6749	16.0085	15.2091	15.5734	16.0287	19.2711	18.0863	18.9203	20.647	20.6771	20.8496	29.2486	46.4474	28.7527	15.7381	40.705	30.5223	45.1714	29.724	22.5789	16.7698
C04C11.2.2	WBGene00007296	arrd-25	965	1049	1031	994	865	951	1055	1087	838	1155	1288	1319	149	323	214	105	47	149	189	155	131	97	41	53	16.9468	17.7618	18.6749	16.0085	15.2091	15.5734	16.0287	19.2711	18.0863	18.9203	20.647	20.6771	20.8496	29.2486	46.4474	28.7527	15.7381	40.705	30.5223	45.1714	29.724	22.5789	16.7698
R05C11.1.1	WBGene00019873	arrd-26	66	69	58	47	59	52	90	70	55	76	71	80	0	6	0	0	0	0	0	0	0	4	0	0	1.15906	1.16831	1.05058	0.75694	1.03738	0.851543	1.36737	1.24101	1.18705	1.24497	1.13815	1.25411	0	0.543317	0	0	0	0	0	0	0	0.93109	0
F48F7.8.1	WBGene00009853	arrd-27	5	11	28	7	2	6	6	9	7	22	26	7	0	0	0	0	0	0	0	0	0	0	0	0	0.0878075	0.186253	0.507176	0.112736	0.0351655	0.098255	0.0911583	0.159558	0.151079	0.360386	0.416787	0.109734	0	0	0	0	0	0	0	0	0	0	0
F21A10.4.1	WBGene00009000	arrd-28	8	12	14	14	13	10	21	7	8	6	15	12	1	0	0	0	0	0	0	0	1	0	0	0	0.140492	0.203185	0.253588	0.225472	0.228576	0.163758	0.319054	0.124101	0.172661	0.0982871	0.240454	0.188116	0.13993	0	0	0	0	0	0	0	0.226901	0	0
M176.1a.1	WBGene00006429	arrd-3	3	5	1	2	2	5	4	5	3	5	6	15	0	3	0	0	0	0	0	0	0	0	0	0	0.0526845	0.0846605	0.0181134	0.0322102	0.0351655	0.0818792	0.0607722	0.0886433	0.0647481	0.081906	0.0961815	0.235145	0	0.271658	0	0	0	0	0	0	0	0	0
M176.1b.1	WBGene00006429	arrd-3	2	2	0	0	2	4	1	3	2	1	5	11	0	0	0	0	0	0	0	0	0	0	0	0	0.035123	0.0338642	0	0	0.0351655	0.0655033	0.015193	0.053186	0.0431654	0.0163812	0.0801513	0.17244	0	0	0	0	0	0	0	0	0	0	0
ZK938.2.1	WBGene00014159	arrd-4	19	18	38	22	16	14	17	13	20	22	27	26	3	8	4	0	3	26	3	28	6	2	6	1	0.333668	0.304778	0.68831	0.354312	0.281324	0.229262	0.258282	0.230473	0.431654	0.360386	0.432817	0.407584	0.41979	0.724423	0.868176	0	1.00456	7.10289	0.48448	8.15999	1.3614	0.465545	2.45412
ZK938.4.1	WBGene00014161	arrd-5	4	8	8	6	4	1	5	4	3	10	10	3	2	0	0	0	0	0	0	0	0	0	0	0	0.070246	0.135457	0.144907	0.0966307	0.070331	0.0163758	0.0759652	0.0709147	0.0647481	0.163812	0.160303	0.047029	0.27986	0	0	0	0	0	0	0	0	0	0
F40F8.8a.1	WBGene00009579	arrd-6	49	41	53	37	49	46	45	38	45	52	43	58	5	21	7	19	10	0	0	12	1	15	0	3	0.860513	0.694216	0.960012	0.595889	0.861555	0.753288	0.683687	0.673689	0.971221	0.851822	0.689301	0.909227	0.699649	1.90161	1.51931	5.20287	3.34854	0	0	3.49714	0.226901	3.49159	0
F40F8.8b.1	WBGene00009579	arrd-6	49	41	53	37	50	46	45	38	47	53	44	58	5	21	7	19	10	0	0	12	1	15	0	3	0.860513	0.694216	0.960012	0.595889	0.879137	0.753288	0.683687	0.673689	1.01439	0.868203	0.705331	0.909227	0.699649	1.90161	1.51931	5.20287	3.34854	0	0	3.49714	0.226901	3.49159	0
Y17G7B.11.1	WBGene00012464	arrd-7	383	351	499	367	332	366	381	436	246	362	343	389	41	39	49	32	23	10	45	17	24	13	10	18	6.72605	5.94316	9.0386	5.91058	5.83747	5.99356	5.78855	7.7297	5.30934	5.92999	5.49838	6.09809	5.73713	3.53156	10.6352	8.76272	7.70163	2.73188	7.2672	4.95428	5.44562	3.02604	4.0902
Y17G7B.14.1	WBGene00012467	arrd-8	14	19	67	15	23	22	7	12	8	17	31	18	0	2	0	0	0	12	0	0	0	0	0	0	0.245861	0.32171	1.2136	0.241577	0.404403	0.360268	0.106351	0.212744	0.172661	0.27848	0.496938	0.282174	0	0.181106	0	0	0	3.27826	0	0	0	0	0
F15A4.9.1	WBGene00008843	arrd-9	45	56	45	101	73	74	66	56	59	74	45	48	34	28	35	19	26	10	5	12	11	17	0	3	0.790267	0.948197	0.815104	1.62662	1.28354	1.21181	1.00274	0.992805	1.27338	1.21221	0.721361	0.752464	4.75762	2.53548	7.59654	5.20287	8.7062	2.73188	0.807467	3.49714	2.49591	3.95713	0
C15F1.6.1	WBGene00000198	art-1	3431	3914	3437	3441	3449	3762	3221	3126	2698	3342	3540	3609	1419	2412	888	590	659	1259	1052	317	675	770	492	763	60.2535	66.2722	62.2558	55.4177	60.6429	61.6059	48.9368	55.4198	58.2301	54.7459	56.7471	56.5759	198.561	218.413	192.735	161.563	220.669	343.944	169.891	92.3828	153.158	179.235	201.238
Y71F9AL.16.1	WBGene00000199	arx-1	804	904	851	982	922	1038	1074	1012	744	951	1072	1118	220	334	206	68	80	106	157	87	117	108	71	87	14.1194	15.3066	15.4145	15.8152	16.2113	16.9981	16.3173	17.9414	16.0575	15.5785	17.1844	17.5261	30.7846	30.2446	44.7111	18.6208	26.7883	28.958	25.3545	25.3543	26.5474	25.1394	29.0404
K07C5.1.1	WBGene00000200	arx-2	864	873	1082	1008	834	1158	1042	1058	779	904	937	1081	222	405	116	51	84	146	165	84	137	157	56	65	15.1731	14.7817	19.5987	16.234	14.664	18.9632	15.8312	18.7569	16.8129	14.8086	15.0203	16.9461	31.0644	36.6739	25.1771	13.9656	28.1277	39.8855	26.6464	24.48	31.0854	36.5453	22.9051
Y79H2A.6a.1	WBGene00000201	arx-3	972	1052	1133	1185	1100	1323	1200	1221	948	1088	1261	1201	303	460	153	122	123	95	238	231	188	199	100	88	17.0698	17.8126	20.5225	19.0846	19.341	21.6652	18.2317	21.6467	20.4604	17.8227	20.2141	18.8273	42.3988	41.6543	33.2077	33.4079	41.187	25.9529	38.4354	67.32	42.6573	46.3218	40.902
Y79H2A.6b.1	WBGene00000201	arx-3	972	1052	1133	1185	1100	1323	1200	1221	950	1090	1261	1201	291	447	157	111	120	95	231	193	171	192	95	83	17.0698	17.8126	20.5225	19.0846	19.341	21.6652	18.2317	21.6467	20.5036	17.8555	20.2141	18.8273	40.7196	40.4771	34.0759	30.3957	40.1824	25.9529	37.305	56.2457	38.8	44.6923	38.8569
Y6D11A.2.1	WBGene00021170	arx-4	595	634	659	851	799	894	794	859	704	825	947	831	165	173	124	104	82	82	148	65	108	71	50	105	10.4491	10.7349	11.9367	13.7055	14.0486	14.64	12.0633	15.2289	15.1942	13.5145	15.1806	13.027	23.0884	15.6656	26.9135	28.4788	27.458	22.4014	23.901	18.9428	24.5053	16.5269	20.451
Y37D8A.1.1	WBGene00000203	arx-5	341	424	412	453	404	469	559	515	462	430	506	491	94	142	113	58	23	22	37	99	52	98	33	50	5.98847	7.17921	7.46273	7.29562	7.10343	7.68027	8.49291	9.13026	9.9712	7.04391	8.11131	7.69708	13.1534	12.8585	24.526	15.8824	7.70163	6.01014	5.97526	28.8514	11.7988	22.8117	13.4977
C35D10.16.1	WBGene00000204	arx-6	254	262	355	336	283	320	346	380	233	282	290	321	12	36	13	12	0	34	26	27	12	13	9	9	4.46062	4.43621	6.43027	5.41132	4.97592	5.24027	5.25679	6.73689	5.02877	4.6195	4.64877	5.0321	1.67916	3.2599	2.82157	3.28602	0	9.2884	4.19883	7.86857	2.72281	3.02604	3.68118
M01B12.3.1	WBGene00000205	arx-7	135	170	159	169	144	197	228	200	191	183	178	172	53	100	32	0	35	48	63	19	28	21	12	26	2.3708	2.87846	2.88003	2.72176	2.53192	3.22604	3.46401	3.54573	4.12229	2.99776	2.85338	2.69633	7.41628	9.05528	6.94541	0	11.7199	13.113	10.1741	5.53714	6.35322	4.88822	4.90824
K11D2.2.1	WBGene00010769	asah-1	6681	6580	9966	4632	4623	6517	2957	3451	1734	4312	4960	6367	1112	1225	473	300	229	335	173	121	131	262	153	231	117.328	111.413	180.518	74.5989	81.285	106.721	44.9258	61.1816	37.4244	70.6357	79.5101	99.8112	155.602	110.927	102.662	82.1505	76.6815	91.5181	27.9384	35.2628	29.724	60.9864	62.5801
K11D2.2.2	WBGene00010769	asah-1	6681	6580	9966	4632	4623	6517	2957	3451	1734	4312	4960	6367	1112	1225	473	300	229	335	173	121	131	262	153	231	117.328	111.413	180.518	74.5989	81.285	106.721	44.9258	61.1816	37.4244	70.6357	79.5101	99.8112	155.602	110.927	102.662	82.1505	76.6815	91.5181	27.9384	35.2628	29.724	60.9864	62.5801
K11D2.2.3	WBGene00010769	asah-1	6681	6580	9966	4632	4623	6517	2957	3451	1734	4312	4960	6367	1112	1225	473	300	229	335	173	121	131	262	153	231	117.328	111.413	180.518	74.5989	81.285	106.721	44.9258	61.1816	37.4244	70.6357	79.5101	99.8112	155.602	110.927	102.662	82.1505	76.6815	91.5181	27.9384	35.2628	29.724	60.9864	62.5801
F27E5.1.1	WBGene00009192	asah-2	3985	3810	5307	2909	2555	3541	2412	3066	1800	3563	3775	4401	479	479	125	126	87	70	106	50	122	167	82	104	69.9825	64.5113	96.128	46.8498	44.9239	57.9868	36.6456	54.3561	38.8488	58.3662	60.5142	68.9915	67.0264	43.3748	27.1305	34.5032	29.1323	19.1232	17.1183	14.5714	27.6819	38.873	33.5396
F35G12.10.1	WBGene00000206	asb-1	224	213	203	250	218	285	448	424	345	283	245	297	29	55	11	1	6	8	67	48	47	31	7	36	3.93377	3.60654	3.67703	4.02628	3.83304	4.66711	6.80648	7.51696	7.44603	4.63588	3.92741	4.65587	4.05797	4.98041	2.38748	0.273835	2.00912	2.18551	10.8201	13.9886	10.6643	7.21595	2.86314
F35G12.10.2	WBGene00000206	asb-1	224	213	203	250	218	285	448	424	345	283	245	297	29	55	11	1	6	8	67	48	47	31	7	36	3.93377	3.60654	3.67703	4.02628	3.83304	4.66711	6.80648	7.51696	7.44603	4.63588	3.92741	4.65587	4.05797	4.98041	2.38748	0.273835	2.00912	2.18551	10.8201	13.9886	10.6643	7.21595	2.86314
F02E8.1.1	WBGene00000207	asb-2	9462	11532	12113	13367	11710	14167	17225	17167	13275	13540	14717	15322	2623	3426	1241	1492	1209	986	2209	1012	1181	1475	715	1141	166.167	195.261	219.408	215.277	205.894	231.996	261.7	304.348	286.51	221.801	235.917	240.193	367.036	310.234	269.352	408.562	404.838	269.364	356.739	294.926	267.97	343.34	292.449
F02E8.1.2	WBGene00000207	asb-2	9462	11532	12113	13367	11710	14167	17225	17167	13275	13540	14717	15322	2623	3426	1241	1492	1209	986	2209	1012	1181	1475	715	1141	166.167	195.261	219.408	215.277	205.894	231.996	261.7	304.348	286.51	221.801	235.917	240.193	367.036	310.234	269.352	408.562	404.838	269.364	356.739	294.926	267.97	343.34	292.449
F02E8.1.3	WBGene00000207	asb-2	9462	11532	12113	13367	11710	14167	17225	17167	13275	13540	14717	15322	2625	3427	1241	1492	1209	986	2220	1012	1181	1475	715	1141	166.167	195.261	219.408	215.277	205.894	231.996	261.7	304.348	286.51	221.801	235.917	240.193	367.316	310.325	269.352	408.562	404.838	269.364	358.515	294.926	267.97	343.34	292.449
C23H3.3b.1	WBGene00016019	ascc-1	334	329	327	298	275	304	404	416	294	359	317	411	22	29	12	14	0	0	25	17	25	20	4	18	5.86554	5.57066	5.92309	4.79932	4.83526	4.97825	6.13799	7.37513	6.34531	5.88085	5.08159	6.44297	3.07846	2.62603	2.60453	3.83369	0	0	4.03734	4.95428	5.67252	4.65545	1.63608
R74.5a.1	WBGene00011279	asd-1	196	176	204	180	152	196	185	187	159	177	185	207	18	42	5	24	13	9	6	22	27	19	7	17	3.44205	2.98005	3.69514	2.89892	2.67258	3.20966	2.81071	3.31526	3.43165	2.89947	2.9656	3.245	2.51874	3.80322	1.08522	6.57204	4.3531	2.45869	0.96896	6.41142	6.12632	4.42268	2.86314
R74.5a.2	WBGene00011279	asd-1	196	176	204	180	152	196	185	187	159	177	185	207	18	42	5	24	13	9	6	22	27	19	7	17	3.44205	2.98005	3.69514	2.89892	2.67258	3.20966	2.81071	3.31526	3.43165	2.89947	2.9656	3.245	2.51874	3.80322	1.08522	6.57204	4.3531	2.45869	0.96896	6.41142	6.12632	4.42268	2.86314
R74.5b.1	WBGene00011279	asd-1	160	140	158	138	125	148	147	149	124	148	140	166	9	30	5	24	13	0	6	22	25	19	7	14	2.80984	2.37049	2.86192	2.22251	2.19784	2.42362	2.23338	2.64157	2.67625	2.42442	2.24424	2.60227	1.25937	2.71658	1.08522	6.57204	4.3531	0	0.96896	6.41142	5.67252	4.42268	2.86314
R74.5b.2	WBGene00011279	asd-1	160	140	158	138	125	148	147	149	124	148	140	166	9	30	5	24	13	0	6	22	25	19	7	14	2.80984	2.37049	2.86192	2.22251	2.19784	2.42362	2.23338	2.64157	2.67625	2.42442	2.24424	2.60227	1.25937	2.71658	1.08522	6.57204	4.3531	0	0.96896	6.41142	5.67252	4.42268	2.86314
R74.5b.3	WBGene00011279	asd-1	160	140	158	138	125	148	147	149	124	148	140	166	9	30	5	24	13	0	6	22	25	19	7	14	2.80984	2.37049	2.86192	2.22251	2.19784	2.42362	2.23338	2.64157	2.67625	2.42442	2.24424	2.60227	1.25937	2.71658	1.08522	6.57204	4.3531	0	0.96896	6.41142	5.67252	4.42268	2.86314
R74.5c.1	WBGene00011279	asd-1	193	175	196	178	152	196	183	184	158	177	183	204	18	40	5	24	13	9	6	22	27	19	7	14	3.38937	2.96312	3.55023	2.86671	2.67258	3.20966	2.78033	3.26208	3.41006	2.89947	2.93354	3.19797	2.51874	3.62211	1.08522	6.57204	4.3531	2.45869	0.96896	6.41142	6.12632	4.42268	2.86314
T21G5.5a.1	WBGene00006423	asd-2	727	737	526	848	838	817	929	724	688	835	971	836	180	262	144	49	109	77	226	27	49	91	46	97	12.7672	12.479	9.52766	13.6571	14.7343	13.3791	14.1143	12.8356	14.8489	13.6783	15.5654	13.1054	25.1874	23.7248	31.2543	13.4179	36.4991	21.0355	36.4975	7.86857	11.1181	21.1823	18.8149
T21G5.5b.1	WBGene00006423	asd-2	836	858	596	946	970	925	1051	828	772	934	1091	957	189	283	148	49	109	89	247	27	49	94	48	98	14.6814	14.5277	10.7956	15.2354	17.0553	15.1476	15.9679	14.6793	16.6618	15.3	17.489	15.0022	26.4467	25.6265	32.1225	13.4179	36.4991	24.3138	39.8889	7.86857	11.1181	21.8806	19.633
T21G5.5c.1	WBGene00006423	asd-2	826	870	608	952	972	938	1051	841	786	958	1110	965	189	282	148	49	109	89	257	27	59	90	48	101	14.5058	14.7309	11.013	15.3321	17.0904	15.3605	15.9679	14.9098	16.964	15.6932	17.7936	15.1277	26.4467	25.5359	32.1225	13.4179	36.4991	24.3138	41.5038	7.86857	13.3871	20.9495	19.633
T21G5.5d.1	WBGene00006423	asd-2	921	959	672	1049	1071	1010	1149	901	858	1028	1189	1064	192	280	153	69	109	90	255	40	55	99	49	102	16.1741	16.2379	12.1722	16.8943	18.8311	16.5396	17.4568	15.9735	18.5179	16.8399	19.06	16.6796	26.8665	25.3548	33.2077	18.8946	36.4991	24.5869	41.1808	11.6571	12.4795	23.0445	20.042
C03D6.5.1	WBGene00007277	asfl-1	25	0	2	3	0	1	1	6	1	1	0	2	0	0	0	0	0	0	0	0	0	0	0	0	0.439037	0	0.0362269	0.0483153	0	0.0163758	0.015193	0.106372	0.0215827	0.0163812	0	0.0313527	0	0	0	0	0	0	0	0	0	0	0
K07A12.3.1	WBGene00000209	asg-1	1221	1540	1421	1469	1239	1465	1826	1812	1406	1396	1464	1575	178	358	107	90	83	119	189	136	222	125	84	88	21.4426	26.0754	25.7392	23.6584	21.785	23.9906	27.7425	32.1243	30.3453	22.8681	23.4683	24.6902	24.9075	32.4179	23.2237	24.6452	27.7929	32.5094	30.5223	39.6343	50.372	29.0966	34.3577
C53B7.4.1	WBGene00000210	asg-2	2983	3504	3571	4237	3516	4589	5470	5609	4090	3961	4468	4668	820	2012	525	508	327	395	820	235	654	653	235	325	52.3859	59.3301	64.683	68.2374	61.8209	75.1487	83.106	99.4401	88.2732	64.8859	71.6232	73.1771	114.743	182.192	113.948	139.108	109.497	107.909	132.425	68.4857	148.393	152.001	96.1197
Y17G7B.2a.1	WBGene00012458	ash-2	473	404	411	397	366	323	401	315	270	381	358	363	65	74	33	31	22	41	25	45	27	30	13	13	8.30659	6.84057	7.44462	6.39373	6.43529	5.28939	6.09241	5.58453	5.82733	6.24123	5.73883	5.69051	9.09544	6.70091	7.16245	8.48889	7.36678	11.2007	4.03734	13.1143	6.12632	6.98318	5.31726
Y17G7B.2b.1	WBGene00012458	ash-2	473	404	411	397	366	323	401	315	270	381	358	363	65	74	33	31	22	41	25	45	27	30	13	13	8.30659	6.84057	7.44462	6.39373	6.43529	5.28939	6.09241	5.58453	5.82733	6.24123	5.73883	5.69051	9.09544	6.70091	7.16245	8.48889	7.36678	11.2007	4.03734	13.1143	6.12632	6.98318	5.31726
Y17G7B.2d.1	WBGene00012458	ash-2	473	404	411	397	366	323	401	315	270	381	358	363	65	72	29	31	22	41	25	45	27	28	13	13	8.30659	6.84057	7.44462	6.39373	6.43529	5.28939	6.09241	5.58453	5.82733	6.24123	5.73883	5.69051	9.09544	6.5198	6.29428	8.48889	7.36678	11.2007	4.03734	13.1143	6.12632	6.51763	5.31726
Y17G7B.2e.1	WBGene00012458	ash-2	473	404	411	397	366	323	401	315	270	381	358	363	65	72	29	31	22	41	25	45	27	28	13	13	8.30659	6.84057	7.44462	6.39373	6.43529	5.28939	6.09241	5.58453	5.82733	6.24123	5.73883	5.69051	9.09544	6.5198	6.29428	8.48889	7.36678	11.2007	4.03734	13.1143	6.12632	6.51763	5.31726
ZK770.1.1	WBGene00022815	asic-1	45	41	49	57	48	57	70	43	53	53	76	71	8	4	14	0	5	2	9	0	0	0	0	13	0.790267	0.694216	0.887558	0.917991	0.843972	0.933423	1.06351	0.762333	1.14388	0.868203	1.2183	1.11302	1.11944	0.362211	3.03862	0	1.67427	0.546376	1.45344	0	0	0	0
T28F4.2.1	WBGene00012137	asic-2	17	21	26	19	12	14	19	19	15	26	26	18	2	0	3	0	0	0	6	0	0	6	0	0	0.298545	0.355574	0.470949	0.305997	0.210993	0.229262	0.288668	0.336845	0.32374	0.425911	0.416787	0.282174	0.27986	0	0.651132	0	0	0	0.96896	0	0	1.39664	0
B0252.2.1	WBGene00000211	asm-1	336	404	366	368	324	358	324	313	283	306	349	268	88	195	64	61	34	0	84	54	38	27	26	36	5.90066	6.84057	6.62951	5.92668	5.69681	5.86255	4.92255	5.54907	6.1079	5.01264	5.59456	4.20126	12.3138	17.6578	13.8908	16.7039	11.385	0	13.5654	15.7371	8.62223	6.28486	10.6345
B0252.2.2	WBGene00000211	asm-1	336	404	366	368	324	358	324	313	283	306	349	268	88	195	64	61	34	0	84	54	38	27	26	36	5.90066	6.84057	6.62951	5.92668	5.69681	5.86255	4.92255	5.54907	6.1079	5.01264	5.59456	4.20126	12.3138	17.6578	13.8908	16.7039	11.385	0	13.5654	15.7371	8.62223	6.28486	10.6345
ZK455.4.1	WBGene00000212	asm-2	1406	1721	2148	1128	1085	1596	735	760	444	882	970	1201	128	154	35	61	32	12	32	47	18	25	19	34	24.6915	29.1401	38.9076	18.1666	19.0773	26.1358	11.1669	13.4738	9.58271	14.4482	15.5493	18.8273	17.911	13.9451	7.59654	16.7039	10.7153	3.27826	5.16779	13.6971	4.08421	5.81932	7.77138
W03G1.7a.1	WBGene00000213	asm-3	6610	7983	7698	4137	3774	5166	1200	1222	609	3217	3373	3795	418	508	101	144	56	50	43	19	24	93	55	43	116.081	135.169	139.437	66.6269	66.3573	84.5976	18.2317	21.6644	13.1439	52.6983	54.07	59.4917	58.4907	46.0008	21.9214	39.4323	18.7518	13.6594	6.94422	5.53714	5.44562	21.6479	22.4961
W03G1.7b.1	WBGene00000213	asm-3	6449	7793	7520	4048	3682	5040	1174	1195	604	3149	3306	3705	404	486	101	144	56	50	43	19	21	81	51	43	113.254	131.952	136.213	65.1935	64.7397	82.5342	17.8366	21.1858	13.0359	51.5844	52.996	58.0808	56.5317	44.0087	21.9214	39.4323	18.7518	13.6594	6.94422	5.53714	4.76491	18.8546	20.86
ZK637.5.1	WBGene00014025	asna-1	940	1012	1123	1100	956	1129	1239	1297	1014	1145	1234	1295	318	392	83	166	136	166	223	51	162	141	78	101	16.5078	17.1353	20.3414	17.7156	16.8091	18.4883	18.8242	22.9941	21.8848	18.7565	19.7813	20.3008	44.4977	35.4967	18.0147	45.4566	45.5401	45.3492	36.013	14.8628	36.7579	32.8209	31.9036
F25G6.6.1	WBGene00003816	asns-1	32	44	37	37	57	35	72	48	45	46	53	59	1	10	4	0	14	0	11	0	7	10	3	0	0.561968	0.745012	0.670197	0.595889	1.00222	0.573154	1.0939	0.850976	0.971221	0.753535	0.849603	0.924903	0.13993	0.905528	0.868176	0	4.68795	0	1.77643	0	1.5883	2.32773	1.22706
M02D8.4a.1	WBGene00019730	asns-2	9794	13509	9511	6716	5504	7589	5090	6411	3617	6930	6477	9094	1532	2890	791	433	315	458	620	347	319	376	250	510	171.997	228.736	172.277	108.162	96.7755	124.276	77.3326	113.658	78.0646	113.522	103.828	142.561	214.373	261.698	171.682	118.571	105.479	125.12	100.126	101.126	72.3813	87.5225	102.255
M02D8.4b.1	WBGene00019730	asns-2	7818	10848	7615	5401	4440	6173	4140	5131	2975	5601	5248	7387	599	1370	462	203	133	284	377	317	308	205	170	215	137.296	183.679	137.934	86.9837	78.0674	101.088	62.8992	90.9658	64.2085	91.751	84.1268	115.801	83.818	124.057	100.274	55.5885	44.5355	77.5855	60.883	92.3828	69.8854	47.7184	69.5334
M02D8.4c.1	WBGene00019730	asns-2	9122	12630	8992	6304	5194	7151	4777	6010	3430	6499	6073	8576	1082	2377	702	366	250	432	505	286	273	330	225	462	160.196	213.852	162.876	101.527	91.3248	117.104	72.5772	106.549	74.0286	106.461	97.3517	134.44	151.404	215.244	152.365	100.224	83.7134	118.017	81.5542	83.3485	61.9439	76.815	92.0295
Y39B6A.20.1	WBGene00000214	asp-1	81132	62122	118030	78664	81853	101853	97023	90457	61665	69178	91890	79782	4180	5025	1589	1848	1592	827	4107	843	2907	2062	1164	973	1424.8	1051.86	2137.93	1266.89	1439.2	1667.93	1474.07	1603.68	1330.9	1133.22	1473.02	1250.69	584.907	455.028	344.883	506.047	533.087	225.927	663.253	245.674	659.6	479.977	476.099
Y39B6A.20.2	WBGene00000214	asp-1	81132	62122	118030	78664	81853	101853	97023	90457	61665	69178	91890	79782	4180	5025	1589	1848	1592	827	4107	843	2907	2062	1164	973	1424.8	1051.86	2137.93	1266.89	1439.2	1667.93	1474.07	1603.68	1330.9	1133.22	1473.02	1250.69	584.907	455.028	344.883	506.047	533.087	225.927	663.253	245.674	659.6	479.977	476.099
F21F8.4.1	WBGene00017678	asp-12	618	333	1095	522	1063	975	554	535	312	473	1280	600	130	94	140	32	80	31	74	0	41	67	60	35	10.853	5.63839	19.8342	8.40687	18.6905	15.9664	8.41695	9.48484	6.7338	7.7483	20.5187	9.4058	18.1909	8.51197	30.3862	8.76272	26.7883	8.46883	11.9505	0	9.30293	15.5958	24.5412
F21F8.4.2	WBGene00017678	asp-12	618	333	1095	522	1063	975	554	535	312	473	1280	600	130	94	140	32	80	31	74	0	41	67	60	35	10.853	5.63839	19.8342	8.40687	18.6905	15.9664	8.41695	9.48484	6.7338	7.7483	20.5187	9.4058	18.1909	8.51197	30.3862	8.76272	26.7883	8.46883	11.9505	0	9.30293	15.5958	24.5412
F28A12.4.1	WBGene00017881	asp-13	10446	12162	12122	8172	7174	9553	6849	8586	5384	7741	7913	9396	994	1800	335	368	271	231	470	261	523	405	360	296	183.447	205.928	219.571	131.611	126.139	156.438	104.057	152.218	116.201	126.807	126.847	147.295	139.09	162.995	72.7097	100.771	90.7453	63.1065	75.9019	76.0628	118.669	94.2729	147.247
F28A12.4.2	WBGene00017881	asp-13	10446	12162	12122	8172	7174	9553	6849	8586	5384	7741	7913	9396	994	1800	335	368	271	231	470	261	523	405	360	296	183.447	205.928	219.571	131.611	126.139	156.438	104.057	152.218	116.201	126.807	126.847	147.295	139.09	162.995	72.7097	100.771	90.7453	63.1065	75.9019	76.0628	118.669	94.2729	147.247
K10C2.3.1	WBGene00019619	asp-14	4009	3966	4785	2152	2007	2303	1917	1772	1091	2417	3258	2538	995	1476	337	237	320	207	338	107	161	310	223	184	70.404	67.1527	86.6727	34.6582	35.2886	37.7135	29.1251	31.4152	23.5467	39.5933	52.2266	39.7865	139.23	133.656	73.1438	64.8989	107.153	56.55	54.5848	31.1828	36.531	72.1595	91.2115
Y39B6A.22.1	WBGene00012681	asp-15	1	3	4	2	2	2	1	1	1	1	3	5	0	3	0	0	0	0	0	0	0	0	0	0	0.0175615	0.0507963	0.0724537	0.0322102	0.0351655	0.0327517	0.015193	0.0177287	0.0215827	0.0163812	0.0480908	0.0783816	0	0.271658	0	0	0	0	0	0	0	0	0
Y39B6A.23.1	WBGene00012682	asp-16	8	10	24	3	4	7	0	1	1	9	8	7	1	0	3	0	0	18	0	0	0	0	0	0	0.140492	0.169321	0.434722	0.0483153	0.070331	0.114631	0	0.0177287	0.0215827	0.147431	0.128242	0.109734	0.13993	0	0.651132	0	0	4.91739	0	0	0	0	0
Y39B6A.24.1	WBGene00012683	asp-17	956	1161	1030	255	220	316	286	319	211	398	378	428	411	614	244	64	28	77	91	16	17	50	16	31	16.7888	19.6582	18.6568	4.1068	3.8682	5.17476	4.34521	5.65545	4.55395	6.51971	6.05944	6.70947	57.5112	55.5994	52.9587	17.5254	9.3759	21.0355	14.6959	4.66285	3.85731	11.6386	6.54432
ZK384.3.1	WBGene00013973	asp-18	8	14	13	2	7	5	6	1	1	8	10	8	0	0	0	0	0	0	0	0	0	0	0	0	0.140492	0.237049	0.235475	0.0322102	0.123079	0.0818792	0.0911583	0.0177287	0.0215827	0.13105	0.160303	0.125411	0	0	0	0	0	0	0	0	0	0	0
ZK384.6.1	WBGene00077655	asp-19	6	4	4	4	3	0	2	0	1	1	2	0	0	0	0	0	0	0	0	0	0	0	0	0	0.105369	0.0677284	0.0724537	0.0644205	0.0527482	0	0.0303861	0	0.0215827	0.0163812	0.0320605	0	0	0	0	0	0	0	0	0	0	0	0
T18H9.2.1	WBGene00000215	asp-2	24358	25094	33804	22762	22653	28927	30443	32413	21719	21173	25692	25822	3234	4967	1402	1376	1916	1267	3916	1079	1465	1365	1035	1176	427.763	424.894	612.306	366.585	398.302	473.704	462.522	574.639	468.754	346.839	411.849	404.794	452.533	449.776	304.296	376.797	641.58	346.129	632.408	314.451	332.41	317.735	423.336
H22K11.1.1	WBGene00000216	asp-3	83720	82329	124434	71720	66147	85164	65528	71892	46899	61460	68232	75453	8283	9071	3457	2437	1882	2148	3989	2380	3509	2123	2007	1571	1470.25	1394	2253.93	1155.06	1163.05	1394.63	995.57	1274.55	1012.21	1006.79	1093.78	1182.83	1159.04	821.405	750.321	667.336	630.195	586.808	644.197	693.6	796.195	494.176	820.903
R12H7.2.1	WBGene00000217	asp-4	47507	55532	53697	46400	40693	50905	33337	36089	27675	43930	42439	47141	7479	11939	4318	3027	2334	2777	3778	1227	2013	3025	1442	2444	834.294	940.273	972.637	747.277	715.495	833.612	506.491	639.81	597.301	719.626	680.308	738.998	1046.54	1081.11	937.196	828.899	781.548	758.644	610.122	357.583	456.751	704.137	589.807
F21F8.3.1	WBGene00000218	asp-5	49599	47606	69215	52469	48640	62077	65686	71511	49598	53345	60995	63340	3232	4278	1138	1717	1326	801	4912	1114	3193	2110	1153	939	871.032	806.069	1253.72	845.019	855.225	1016.56	997.97	1267.79	1070.46	873.855	977.765	992.939	452.253	387.385	246.996	470.175	444.016	218.824	793.256	324.651	724.494	491.15	471.6
F21F8.3.2	WBGene00000218	asp-5	49599	47606	69215	52469	48640	62077	65686	71511	49598	53345	60995	63340	3234	4280	1139	1717	1326	801	4912	1114	3193	2110	1153	939	871.032	806.069	1253.72	845.019	855.225	1016.56	997.97	1267.79	1070.46	873.855	977.765	992.939	452.533	387.566	247.213	470.175	444.016	218.824	793.256	324.651	724.494	491.15	471.6
F21F8.7.1	WBGene00000219	asp-6	80939	60532	128485	69174	65403	86132	82745	98800	61204	62479	72578	81083	6550	8068	1987	2488	2080	1165	5994	1514	3395	2943	1919	1427	1421.41	1024.93	2327.3	1114.06	1149.96	1410.48	1257.15	1751.59	1320.95	1023.48	1163.44	1271.08	916.541	730.58	431.266	681.302	696.496	318.264	967.992	441.223	770.328	685.05	784.909
F59D6.2.1	WBGene00019104	asp-7	13	5	10	7	4	5	19	19	18	8	12	13	3	4	0	0	0	0	0	12	0	0	0	0	0.228299	0.0846605	0.181134	0.112736	0.070331	0.0818792	0.288668	0.336845	0.388488	0.13105	0.192363	0.203792	0.41979	0.362211	0	0	0	0	0	3.49714	0	0	0
F59D6.3.1	WBGene00019105	asp-8	1448	1914	2367	858	1014	1059	2936	2924	2187	1017	1380	1466	259	555	256	74	44	107	419	278	330	132	62	96	25.429	32.408	42.8745	13.8182	17.8289	17.342	44.6068	51.8386	47.2013	16.6597	22.1217	22.9815	36.2418	50.2568	55.5633	20.2638	14.7336	29.2311	67.6657	81.0171	74.8772	30.726	25.3592
C11D2.2.1	WBGene00015700	asp-9	35	45	37	25	25	21	23	16	13	36	22	34	2	1	0	0	0	0	0	27	5	19	1	5	0.614652	0.761944	0.670197	0.402628	0.439569	0.343893	0.34944	0.283659	0.280575	0.589723	0.352666	0.532995	0.27986	0.0905528	0	0	0	0	0	7.86857	1.1345	4.42268	0.40902
C45G3.1.1	WBGene00008107	aspm-1	78	16	15	49	23	24	43	31	39	16	22	26	5	1	2	11	0	0	0	8	0	0	0	0	1.3698	0.270913	0.271701	0.789151	0.404403	0.39302	0.653301	0.549589	0.841725	0.262099	0.352666	0.407584	0.699649	0.0905528	0.434088	3.01219	0	0	0	2.33143	0	0	0
B0024.10.1	WBGene00007100	asps-1	269	234	276	234	233	266	318	285	182	223	276	282	38	43	18	10	6	17	18	22	28	31	9	20	4.72404	3.96211	4.99931	3.7686	4.09678	4.35597	4.83139	5.05267	3.92805	3.65301	4.42435	4.42072	5.31734	3.89377	3.90679	2.73835	2.00912	4.6442	2.90688	6.41142	6.35322	7.21595	3.68118
T08H4.3.1	WBGene00020368	ast-1	40	33	46	27	25	20	41	24	29	21	48	35	0	0	5	0	0	0	4	0	0	0	1	1	0.70246	0.558759	0.833218	0.434838	0.439569	0.327517	0.622915	0.425488	0.625898	0.344005	0.769452	0.548671	0	0	1.08522	0	0	0	0.645974	0	0	0	0.40902
F54B3.3.1	WBGene00010015	atad-3	423	433	336	1092	938	982	2084	1899	1642	1174	1161	1187	75	154	13	147	109	80	393	211	224	150	64	106	7.42851	7.3316	6.08611	17.5868	16.4926	16.0811	31.6623	33.6667	35.4388	19.2315	18.6111	18.6078	10.4947	13.9451	2.82157	40.2538	36.4991	21.8551	63.4669	61.4914	50.8258	34.9159	26.1773
F54B3.3.2	WBGene00010015	atad-3	423	433	336	1092	938	982	2084	1899	1642	1174	1161	1187	75	154	13	147	109	80	393	211	224	150	64	106	7.42851	7.3316	6.08611	17.5868	16.4926	16.0811	31.6623	33.6667	35.4388	19.2315	18.6111	18.6078	10.4947	13.9451	2.82157	40.2538	36.4991	21.8551	63.4669	61.4914	50.8258	34.9159	26.1773
W06B11.1.1	WBGene00021059	atat-2	41	59	41	56	53	42	37	57	68	89	66	73	17	46	7	15	9	0	12	0	5	6	8	3	0.720021	0.998993	0.74265	0.901886	0.931886	0.687785	0.562143	1.01053	1.46762	1.45793	1.058	1.14437	2.37881	4.16543	1.51931	4.10753	3.01368	0	1.93792	0	1.1345	1.39664	3.27216
K07A1.9a.1	WBGene00010615	ate-1	427	443	481	400	333	429	458	453	311	414	412	444	81	122	42	33	28	27	48	29	29	35	20	39	7.49876	7.50092	8.71256	6.44205	5.85506	7.02523	6.95842	8.03109	6.71222	6.78181	6.60446	6.96029	11.3343	11.0474	9.11585	9.03656	9.3759	7.37608	7.75168	8.45142	6.58012	8.14704	8.1804
K07A1.9b.1	WBGene00010615	ate-1	425	436	478	398	328	416	451	448	305	409	408	440	81	122	42	33	28	27	48	29	29	44	20	39	7.46363	7.38239	8.65822	6.40983	5.76714	6.81235	6.85206	7.94244	6.58272	6.69991	6.54034	6.89758	11.3343	11.0474	9.11585	9.03656	9.3759	7.37608	7.75168	8.45142	6.58012	10.242	8.1804
K07A1.9c.1	WBGene00010615	ate-1	111	85	113	97	94	120	129	117	77	111	92	100	0	3	0	0	0	0	0	0	4	5	0	6	1.94933	1.43923	2.04682	1.5622	1.65278	1.9651	1.9599	2.07425	1.66187	1.81831	1.47478	1.56763	0	0.271658	0	0	0	0	0	0	0.907603	1.16386	0
K07A1.9d.1	WBGene00010615	ate-1	431	449	486	414	338	430	465	462	314	422	423	452	48	95	29	33	16	30	48	17	29	25	17	30	7.569	7.60251	8.80313	6.66752	5.94297	7.04161	7.06477	8.19065	6.77696	6.91286	6.7808	7.0857	6.71663	8.60252	6.29428	9.03656	5.35766	8.19565	7.75168	4.95428	6.58012	5.81932	6.95334
K07A1.9e.1	WBGene00010615	ate-1	378	426	437	381	299	378	418	422	275	376	396	403	48	93	29	33	16	30	48	17	25	22	17	24	6.63824	7.21307	7.91557	6.13605	5.25724	6.19007	6.35069	7.4815	5.93524	6.15933	6.34798	6.31756	6.71663	8.42141	6.29428	9.03656	5.35766	8.19565	7.75168	4.95428	5.67252	5.121	6.95334
K07A1.9f.1	WBGene00010615	ate-1	387	423	438	372	302	383	423	422	284	376	386	412	81	120	42	33	28	27	48	29	25	32	20	33	6.7963	7.16228	7.93368	5.9911	5.30999	6.27194	6.42666	7.4815	6.12948	6.15933	6.18768	6.45865	11.3343	10.8663	9.11585	9.03656	9.3759	7.37608	7.75168	8.45142	5.67252	7.44872	8.1804
K08F8.2.1	WBGene00000220	atf-2	71	73	66	56	58	33	50	54	34	45	38	31	0	13	0	0	0	0	0	0	0	5	0	0	1.24687	1.23604	1.19549	0.901886	1.0198	0.540403	0.759652	0.957348	0.733811	0.737154	0.60915	0.485966	0	1.17719	0	0	0	0	0	0	0	1.16386	0
T04C10.4.1	WBGene00000221	atf-5	1655	1494	1453	1250	1226	1348	1270	1152	947	1284	1308	1149	2	4	0	0	0	0	0	0	0	0	0	0	29.0643	25.2965	26.3188	20.1314	21.5565	22.0746	19.2952	20.4234	20.4388	21.0334	20.9676	18.0121	0.27986	0.362211	0	0	0	0	0	0	0	0	0
T04C10.4.2	WBGene00000221	atf-5	1655	1494	1453	1250	1226	1348	1270	1152	947	1284	1308	1149	2	4	0	0	0	0	0	0	0	0	0	0	29.0643	25.2965	26.3188	20.1314	21.5565	22.0746	19.2952	20.4234	20.4388	21.0334	20.9676	18.0121	0.27986	0.362211	0	0	0	0	0	0	0	0	0
F45E6.2.1	WBGene00000222	atf-6	312	308	293	224	201	220	249	228	174	210	221	250	9	10	16	23	0	14	14	14	7	3	10	4	5.47919	5.21508	5.30723	3.60755	3.53413	3.60268	3.78307	4.04214	3.75539	3.44005	3.54269	3.91908	1.25937	0.905528	3.4727	6.29821	0	3.82464	2.26091	4.08	1.5883	0.698318	4.0902
C07G2.2a.1	WBGene00000223	atf-7	2613	2124	2236	2101	1736	1985	2310	2004	1528	2047	2130	2035	154	244	162	28	34	64	99	92	139	41	60	97	45.8882	35.9638	40.5016	33.8368	30.5237	32.506	35.0959	35.5283	32.9783	33.5323	34.1444	31.9013	21.5492	22.0949	35.1611	7.66738	11.385	17.484	15.9878	26.8114	31.5392	9.54368	24.5412
C07G2.2b.1	WBGene00000223	atf-7	2613	2124	2236	2101	1736	1985	2310	2004	1528	2047	2130	2035	154	244	162	28	34	64	99	92	137	41	60	97	45.8882	35.9638	40.5016	33.8368	30.5237	32.506	35.0959	35.5283	32.9783	33.5323	34.1444	31.9013	21.5492	22.0949	35.1611	7.66738	11.385	17.484	15.9878	26.8114	31.0854	9.54368	24.5412
C07G2.2c.1	WBGene00000223	atf-7	2687	2190	2307	2182	1806	2054	2388	2067	1588	2155	2210	2098	162	270	171	28	38	90	112	107	145	47	62	110	47.1877	37.0813	41.7877	35.1414	31.7544	33.636	36.281	36.6452	34.2733	35.3015	35.4269	32.8889	22.6686	24.4493	37.1145	7.66738	12.7244	24.5869	18.0873	31.1828	32.9006	10.9403	25.3592
C07G2.2c.2	WBGene00000223	atf-7	2687	2190	2307	2182	1806	2054	2388	2067	1588	2155	2210	2098	162	270	171	28	38	90	112	107	145	47	62	110	47.1877	37.0813	41.7877	35.1414	31.7544	33.636	36.281	36.6452	34.2733	35.3015	35.4269	32.8889	22.6686	24.4493	37.1145	7.66738	12.7244	24.5869	18.0873	31.1828	32.9006	10.9403	25.3592
C07G2.2d.1	WBGene00000223	atf-7	2211	1817	1896	1810	1480	1677	1965	1678	1322	1753	1821	1767	97	133	111	0	26	51	66	43	83	17	51	59	38.8285	30.7656	34.3431	29.1503	26.0225	27.4623	29.8543	29.7487	28.5323	28.7162	29.1911	27.7001	13.5732	12.0435	24.0919	0	8.7062	13.9326	10.6586	12.5314	18.8328	3.95713	20.86
F17A9.3.1	WBGene00017535	atf-8	2	5	5	4	9	3	7	9	4	8	9	2	0	0	0	0	0	0	0	0	0	0	0	0	0.035123	0.0846605	0.0905671	0.0644205	0.158245	0.0491275	0.106351	0.159558	0.0863307	0.13105	0.144272	0.0313527	0	0	0	0	0	0	0	0	0	0	0
ZC376.7a.1	WBGene00013878	atfs-1	860	754	892	852	746	830	861	810	654	814	859	867	57	90	60	91	23	146	48	90	63	48	39	40	15.1029	12.7668	16.1572	13.7216	13.1167	13.5919	13.0812	14.3602	14.1151	13.3343	13.77	13.5914	7.976	8.14975	13.0226	24.919	7.70163	39.8855	7.75168	26.2286	14.2947	11.1731	15.9518
ZC376.7a.2	WBGene00013878	atfs-1	860	754	892	852	746	830	861	810	654	814	859	867	57	90	60	91	23	146	48	90	63	48	39	40	15.1029	12.7668	16.1572	13.7216	13.1167	13.5919	13.0812	14.3602	14.1151	13.3343	13.77	13.5914	7.976	8.14975	13.0226	24.919	7.70163	39.8855	7.75168	26.2286	14.2947	11.1731	15.9518
ZC376.7b.1	WBGene00013878	atfs-1	860	754	892	852	746	830	861	810	654	814	859	867	52	92	57	91	23	139	62	90	58	50	41	51	15.1029	12.7668	16.1572	13.7216	13.1167	13.5919	13.0812	14.3602	14.1151	13.3343	13.77	13.5914	7.27635	8.33086	12.3715	24.919	7.70163	37.9732	10.0126	26.2286	13.1602	11.6386	16.7698
ZC376.7b.2	WBGene00013878	atfs-1	860	754	892	852	746	830	861	810	654	814	859	867	52	92	57	91	23	139	62	90	58	50	41	51	15.1029	12.7668	16.1572	13.7216	13.1167	13.5919	13.0812	14.3602	14.1151	13.3343	13.77	13.5914	7.27635	8.33086	12.3715	24.919	7.70163	37.9732	10.0126	26.2286	13.1602	11.6386	16.7698
ZC376.7c.1	WBGene00013878	atfs-1	860	754	892	852	746	830	861	810	654	814	859	867	52	92	57	91	23	139	62	90	58	50	41	51	15.1029	12.7668	16.1572	13.7216	13.1167	13.5919	13.0812	14.3602	14.1151	13.3343	13.77	13.5914	7.27635	8.33086	12.3715	24.919	7.70163	37.9732	10.0126	26.2286	13.1602	11.6386	16.7698
ZC376.7c.2	WBGene00013878	atfs-1	860	754	892	852	746	830	861	810	654	814	859	867	52	92	57	91	23	139	62	90	58	50	41	51	15.1029	12.7668	16.1572	13.7216	13.1167	13.5919	13.0812	14.3602	14.1151	13.3343	13.77	13.5914	7.27635	8.33086	12.3715	24.919	7.70163	37.9732	10.0126	26.2286	13.1602	11.6386	16.7698
ZC376.7d.1	WBGene00013878	atfs-1	524	451	526	497	414	477	504	496	408	450	495	490	34	62	45	67	17	59	23	70	36	28	24	31	9.20222	7.63637	9.52766	8.00424	7.27926	7.81127	7.6573	8.79342	8.80574	7.37154	7.93497	7.6814	4.75762	5.61428	9.76698	18.347	5.69251	16.1181	3.71435	20.4	8.16843	6.51763	9.81648
ZC376.7d.2	WBGene00013878	atfs-1	524	451	526	497	414	477	504	496	408	450	495	490	34	62	45	67	17	59	23	70	36	28	24	31	9.20222	7.63637	9.52766	8.00424	7.27926	7.81127	7.6573	8.79342	8.80574	7.37154	7.93497	7.6814	4.75762	5.61428	9.76698	18.347	5.69251	16.1181	3.71435	20.4	8.16843	6.51763	9.81648
D2085.2.1	WBGene00008427	atg-10	8	6	13	14	11	11	24	21	19	17	27	22	3	0	6	0	0	0	0	0	6	3	2	6	0.140492	0.101593	0.235475	0.225472	0.19341	0.180134	0.364633	0.372302	0.410071	0.27848	0.432817	0.344879	0.41979	0	1.30226	0	0	0	0	0	1.3614	0.698318	0.81804
D2007.5.1	WBGene00017045	atg-13	355	421	427	350	287	370	359	416	267	366	394	443	37	49	61	24	8	18	0	22	19	20	20	37	6.23433	7.12841	7.73443	5.63679	5.04625	6.05906	5.4543	7.37513	5.76258	5.99552	6.31592	6.94461	5.17741	4.43709	13.2397	6.57204	2.67883	4.91739	0	6.41142	4.31111	4.65545	8.1804
D2007.5.2	WBGene00017045	atg-13	355	421	427	350	287	370	359	416	267	366	394	443	37	49	61	24	8	18	0	22	19	20	20	37	6.23433	7.12841	7.73443	5.63679	5.04625	6.05906	5.4543	7.37513	5.76258	5.99552	6.31592	6.94461	5.17741	4.43709	13.2397	6.57204	2.67883	4.91739	0	6.41142	4.31111	4.65545	8.1804
F02E8.5.1	WBGene00017178	atg-16.1	167	153	207	165	156	171	185	205	151	146	185	209	12	46	30	28	6	30	21	25	14	6	13	33	2.93277	2.59061	3.74948	2.65734	2.74291	2.80027	2.81071	3.63438	3.25899	2.39165	2.9656	3.27635	1.67916	4.16543	6.51132	7.66738	2.00912	8.19565	3.39136	7.28571	3.17661	1.39664	5.31726
K06A1.5.1	WBGene00019427	atg-16.2	569	499	670	366	328	444	453	524	300	421	464	544	47	78	35	26	9	10	39	11	29	25	7	31	9.99249	8.44911	12.136	5.89447	5.76714	7.27087	6.88245	9.28982	6.47481	6.89648	7.43804	8.52792	6.5767	7.06312	7.59654	7.11971	3.01368	2.73188	6.29824	3.20571	6.58012	5.81932	2.86314
F41E6.13a.1	WBGene00018294	atg-18	908	968	1071	985	869	1061	1011	891	682	897	978	1118	247	373	216	165	92	111	237	92	152	184	74	87	15.9458	16.3903	19.3995	15.8635	15.2794	17.3748	15.3602	15.7962	14.7194	14.6939	15.6776	17.5261	34.5627	33.7762	46.8815	45.1828	30.8065	30.3239	38.2739	26.8114	34.4889	42.8302	30.2675
F41E6.13b.1	WBGene00018294	atg-18	869	932	1016	934	832	1015	977	860	645	867	930	1076	226	355	196	165	92	111	213	81	147	174	65	85	15.2609	15.7807	18.4032	15.0422	14.6288	16.6215	14.8436	15.2467	13.9208	14.2025	14.9081	16.8677	31.6242	32.1463	42.5406	45.1828	30.8065	30.3239	34.3981	23.6057	33.3544	40.5024	26.5863
M03A8.2.1	WBGene00019748	atg-2	11565	10696	13228	8369	7466	9132	8402	8687	6096	8547	8436	10391	524	764	450	308	242	239	430	359	289	202	177	270	203.099	181.106	239.604	134.784	131.273	149.544	127.652	154.009	131.568	140.01	135.231	162.893	73.3233	69.1824	97.6698	84.3412	81.0346	65.292	69.4422	104.623	65.5743	47.0201	72.3965
M03A8.2.2	WBGene00019748	atg-2	11565	10696	13228	8369	7466	9132	8402	8687	6096	8547	8436	10391	524	764	450	308	242	239	430	359	289	202	177	270	203.099	181.106	239.604	134.784	131.273	149.544	127.652	154.009	131.568	140.01	135.231	162.893	73.3233	69.1824	97.6698	84.3412	81.0346	65.292	69.4422	104.623	65.5743	47.0201	72.3965
Y55F3AM.4a.1	WBGene00021922	atg-3	321	344	377	370	328	431	371	399	331	331	392	442	51	91	47	44	28	40	68	17	35	42	32	18	5.63724	5.82464	6.82876	5.95889	5.76714	7.05798	5.63662	7.07374	7.14387	5.42217	6.28386	6.92894	7.13642	8.24031	10.2011	12.0487	9.3759	10.9275	10.9816	4.95428	7.94152	9.77645	13.0886
Y55F3AM.4b.1	WBGene00021922	atg-3	161	142	146	168	111	173	174	154	134	142	183	188	16	8	8	32	2	0	23	9	18	11	9	4	2.8274	2.40436	2.64456	2.70566	1.95169	2.83302	2.64359	2.73022	2.89208	2.32613	2.93354	2.94715	2.23888	0.724423	1.73635	8.76272	0.669707	0	3.71435	2.62286	4.08421	2.5605	3.68118
Y87G2A.3a.1	WBGene00013595	atg-4.1	452	471	488	447	378	441	461	462	341	445	473	437	183	227	189	82	60	143	127	37	109	49	31	62	7.93779	7.97502	8.83935	7.19899	6.64628	7.22174	7.00399	8.19065	7.3597	7.28963	7.58231	6.85055	25.6072	20.5555	41.0213	22.4545	20.0912	39.0659	20.5097	10.7828	24.7322	11.4059	12.6796
Y87G2A.3a.2	WBGene00013595	atg-4.1	452	471	488	447	378	441	461	462	341	445	473	437	183	227	189	82	60	143	127	37	109	49	31	62	7.93779	7.97502	8.83935	7.19899	6.64628	7.22174	7.00399	8.19065	7.3597	7.28963	7.58231	6.85055	25.6072	20.5555	41.0213	22.4545	20.0912	39.0659	20.5097	10.7828	24.7322	11.4059	12.6796
Y87G2A.3b.1	WBGene00013595	atg-4.1	452	472	488	447	378	441	462	462	341	445	475	437	183	227	189	82	60	143	127	37	109	49	31	62	7.93779	7.99195	8.83935	7.19899	6.64628	7.22174	7.01919	8.19065	7.3597	7.28963	7.61437	6.85055	25.6072	20.5555	41.0213	22.4545	20.0912	39.0659	20.5097	10.7828	24.7322	11.4059	12.6796
ZK792.8.1	WBGene00014080	atg-4.2	254	235	225	247	199	206	225	256	157	243	228	223	22	20	9	0	1	0	13	9	5	12	4	10	4.46062	3.97904	4.07552	3.97796	3.49897	3.37342	3.41844	4.53854	3.38848	3.98063	3.6549	3.49582	3.07846	1.81106	1.9534	0	0.334854	0	2.09941	2.62286	1.1345	2.79327	1.63608
Y71G12B.12a.1	WBGene00022152	atg-5	170	215	208	155	176	213	196	206	183	170	209	226	38	46	71	21	15	8	3	65	43	39	10	21	2.98545	3.6404	3.76759	2.49629	3.09456	3.48805	2.97784	3.65211	3.94963	2.7848	3.35032	3.54285	5.31734	4.16543	15.4101	5.75054	5.02281	2.18551	0.48448	18.9428	9.75673	9.07813	4.0902
Y71G12B.12b.1	WBGene00022152	atg-5	124	143	147	116	125	142	147	141	122	111	145	166	27	29	49	21	5	8	3	65	26	32	8	13	2.17762	2.42129	2.66267	1.86819	2.19784	2.32537	2.23338	2.49974	2.63309	1.81831	2.32439	2.60227	3.77811	2.62603	10.6352	5.75054	1.67427	2.18551	0.48448	18.9428	5.89942	7.44872	3.27216
Y71G12B.12c.1	WBGene00022152	atg-5	170	215	208	155	176	213	196	206	183	170	209	226	38	46	68	21	15	8	3	65	50	39	10	21	2.98545	3.6404	3.76759	2.49629	3.09456	3.48805	2.97784	3.65211	3.94963	2.7848	3.35032	3.54285	5.31734	4.16543	14.759	5.75054	5.02281	2.18551	0.48448	18.9428	11.345	9.07813	4.0902
M7.5.1	WBGene00010882	atg-7	472	499	499	443	400	494	595	551	374	448	538	506	85	111	64	35	33	16	53	22	37	41	8	16	8.28902	8.44911	9.0386	7.13456	7.0331	8.08966	9.03986	9.7685	8.07193	7.33877	8.62428	7.93222	11.894	10.0514	13.8908	9.58423	11.0502	4.37101	8.55915	6.41142	8.39533	9.54368	3.27216
T22H9.2a.1	WBGene00020706	atg-9	1795	1937	1924	1727	1501	1795	1761	1841	1324	1633	1768	2010	144	174	163	31	36	88	52	84	74	92	36	72	31.5229	32.7975	34.8502	27.8135	26.3917	29.3946	26.755	32.6385	28.5755	26.7505	28.3415	31.5094	20.1499	15.7562	35.3782	8.48889	12.0547	24.0406	8.39766	24.48	16.7907	21.4151	14.7247
T22H9.2b.1	WBGene00020706	atg-9	349	358	346	324	311	357	342	333	229	349	308	357	18	9	9	0	0	24	3	0	6	18	2	13	6.12896	6.06169	6.26725	5.21806	5.46823	5.84617	5.19602	5.90365	4.94244	5.71704	4.93732	5.59645	2.51874	0.814975	1.9534	0	0	6.55652	0.48448	0	1.3614	4.18991	0.81804
C05D11.7a.1	WBGene00015484	atgl-1	631	613	620	514	570	691	491	553	412	551	571	644	91	128	91	47	61	40	62	48	43	80	27	23	11.0813	10.3794	11.2303	8.27803	10.0222	11.3157	7.45979	9.80395	8.89207	9.02604	9.15327	10.0956	12.7336	11.5908	19.751	12.8702	20.4261	10.9275	10.0126	13.9886	9.75673	18.6218	11.0435
C05D11.7a.2	WBGene00015484	atgl-1	631	613	620	514	570	691	491	553	412	551	571	644	91	128	91	47	61	40	62	48	43	80	27	23	11.0813	10.3794	11.2303	8.27803	10.0222	11.3157	7.45979	9.80395	8.89207	9.02604	9.15327	10.0956	12.7336	11.5908	19.751	12.8702	20.4261	10.9275	10.0126	13.9886	9.75673	18.6218	11.0435
C05D11.7b.1	WBGene00015484	atgl-1	743	691	698	586	650	773	574	614	466	603	653	710	106	173	113	47	67	51	87	48	44	88	32	31	13.0482	11.7001	12.6432	9.4376	11.4288	12.6585	8.72081	10.8854	10.0575	9.87786	10.4678	11.1302	14.8326	15.6656	24.526	12.8702	22.4352	13.9326	14.0499	13.9886	9.98363	20.484	13.0886
C05D11.7b.2	WBGene00015484	atgl-1	743	691	698	586	650	773	574	614	466	603	653	710	106	173	113	47	67	51	87	48	44	88	32	31	13.0482	11.7001	12.6432	9.4376	11.4288	12.6585	8.72081	10.8854	10.0575	9.87786	10.4678	11.1302	14.8326	15.6656	24.526	12.8702	22.4352	13.9326	14.0499	13.9886	9.98363	20.484	13.0886
F26D10.9a.1	WBGene00000224	atgp-1	2098	2410	2695	1977	1718	2069	1839	1863	1397	1868	1975	2086	236	338	290	127	125	234	139	102	89	128	61	158	36.844	40.8063	48.8157	31.8398	30.2072	33.8816	27.94	33.0285	30.151	30.6001	31.6597	32.7008	33.0235	30.6069	62.9428	34.7771	41.8567	63.926	22.4476	29.7257	20.1942	29.7949	24.9502
F26D10.9b.1	WBGene00000224	atgp-1	798	840	994	670	586	753	613	662	506	680	743	667	96	162	108	76	86	166	50	58	47	66	33	89	14.0141	14.223	18.0047	10.7904	10.3035	12.331	9.31334	11.7364	10.9208	11.1392	11.9105	10.4561	13.4333	14.6696	23.4408	20.8115	28.7974	45.3492	8.07467	16.9028	10.6643	15.363	13.4977
C38C6.2a.1	WBGene00000225	atgp-2	829	931	782	955	950	756	1045	703	741	908	977	796	91	141	69	56	49	97	113	90	110	63	56	69	14.5585	15.7638	14.1647	15.3804	16.7036	12.3801	15.8767	12.4633	15.9928	14.8741	15.6616	12.4784	12.7336	12.7679	14.976	15.3348	16.4078	26.4993	18.2488	26.2286	24.9591	14.6647	22.9051
C38C6.2b.1	WBGene00000225	atgp-2	824	919	774	949	940	749	1038	694	732	897	970	782	84	125	68	56	49	97	113	90	110	54	48	52	14.4707	15.5606	14.0198	15.2838	16.5278	12.2655	15.7704	12.3037	15.7985	14.6939	15.5493	12.2589	11.7541	11.3191	14.759	15.3348	16.4078	26.4993	18.2488	26.2286	24.9591	12.5697	19.633
C38C6.2c.1	WBGene00000225	atgp-2	301	333	289	366	386	262	427	253	303	333	371	289	10	41	28	17	22	15	54	28	32	28	16	30	5.28601	5.63839	5.23478	5.89447	6.78694	4.29047	6.48743	4.48535	6.53955	5.45494	5.94722	4.53046	1.3993	3.71267	6.07723	4.6552	7.36678	4.09782	8.72064	8.15999	7.26082	6.51763	6.54432
C38C6.2c.2	WBGene00000225	atgp-2	301	333	289	366	386	262	427	253	303	333	371	289	10	41	28	17	22	15	54	28	32	28	16	30	5.28601	5.63839	5.23478	5.89447	6.78694	4.29047	6.48743	4.48535	6.53955	5.45494	5.94722	4.53046	1.3993	3.71267	6.07723	4.6552	7.36678	4.09782	8.72064	8.15999	7.26082	6.51763	6.54432
K04G2.5a.1	WBGene00010564	ath-1	502	545	572	566	488	683	626	645	440	534	523	596	141	272	122	99	48	64	85	95	66	67	30	43	8.81587	9.22799	10.3609	9.11549	8.58038	11.1847	9.51085	11.435	9.49638	8.74756	8.38382	9.34309	19.7301	24.6304	26.4794	27.1097	16.073	17.484	13.7269	27.6857	14.9754	15.5958	12.2706
K04G2.5a.2	WBGene00010564	ath-1	502	545	572	566	488	683	626	645	440	534	523	596	141	272	122	99	48	64	85	95	66	67	30	43	8.81587	9.22799	10.3609	9.11549	8.58038	11.1847	9.51085	11.435	9.49638	8.74756	8.38382	9.34309	19.7301	24.6304	26.4794	27.1097	16.073	17.484	13.7269	27.6857	14.9754	15.5958	12.2706
K04G2.5b.1	WBGene00010564	ath-1	534	584	612	600	536	733	662	689	479	570	568	639	145	276	122	99	48	64	93	95	66	73	30	43	9.37784	9.88834	11.0854	9.66307	9.42435	12.0035	10.0578	12.2151	10.3381	9.33728	9.10518	10.0172	20.2898	24.9926	26.4794	27.1097	16.073	17.484	15.0189	27.6857	14.9754	16.9924	12.2706
C44B9.4.1	WBGene00008081	athp-1	224	182	152	152	146	201	209	169	142	173	232	182	18	11	8	0	0	0	15	13	2	6	0	14	3.93377	3.08164	2.75324	2.44798	2.56708	3.29154	3.17535	2.99615	3.06474	2.83395	3.71902	2.85309	2.51874	0.996081	1.73635	0	0	0	2.4224	3.78857	0.453801	1.39664	0
H20J04.2.1	WBGene00019217	athp-2	828	751	742	657	657	715	866	705	693	755	811	810	31	83	17	10	22	9	45	33	3	21	28	9	14.5409	12.716	13.4402	10.5811	11.5519	11.7087	13.1572	12.4987	14.9568	12.3678	13.0005	12.6978	4.33783	7.51589	3.68975	2.73835	7.36678	2.45869	7.2672	9.61714	0.680702	4.88822	11.4526
Y116A8C.22.1	WBGene00013799	athp-3	1	0	0	0	0	0	1	0	0	1	0	0	0	0	0	0	0	0	0	0	0	0	0	0	0.0175615	0	0	0	0	0	0.015193	0	0	0.0163812	0	0	0	0	0	0	0	0	0	0	0	0	0
C55F2.1a.1	WBGene00016957	atic-1	1942	2311	1953	1679	1498	1904	1810	1833	1363	1886	1986	2053	262	415	126	73	87	64	179	150	134	116	85	70	34.1044	39.1301	35.3755	27.0405	26.339	31.1796	27.4994	32.4967	29.4172	30.8949	31.8361	32.1835	36.6616	37.5794	27.3475	19.99	29.1323	17.484	28.9073	43.7143	30.4047	27.0016	34.7667
C55F2.1b.1	WBGene00016957	atic-1	2819	3379	2841	2546	2234	2685	2566	2619	1973	2795	2899	3108	617	889	321	169	149	134	436	237	302	241	186	110	49.5058	57.2135	51.4602	41.0036	39.2799	43.9691	38.9854	46.4314	42.5826	45.7854	46.4717	48.722	86.3367	80.5015	69.6711	46.2781	49.8932	36.6072	70.4111	69.0685	68.524	56.0982	76.0777
C55F2.1c.1	WBGene00016957	atic-1	2099	2518	2154	1842	1656	2088	1998	2008	1527	2107	2196	2290	272	426	141	73	91	71	198	151	171	119	138	78	36.8616	42.635	39.0163	29.6656	29.117	34.1927	30.3557	35.5992	32.9568	34.5152	35.2024	35.8988	38.0609	38.5755	30.6032	19.99	30.4717	19.3964	31.9757	44.0057	38.8	27.6999	56.4448
T06E4.3a.1	WBGene00000226	atl-1	1024	807	741	659	684	653	1045	690	705	1009	959	858	2	19	8	0	1	10	4	27	14	14	6	11	17.983	13.6642	13.422	10.6133	12.0266	10.6934	15.8767	12.2328	15.2158	16.5286	15.373	13.4503	0.27986	1.7205	1.73635	0	0.334854	2.73188	0.645974	7.86857	3.17661	3.25882	2.45412
T06E4.3b.1	WBGene00000226	atl-1	1024	807	741	659	684	653	1045	690	705	1009	959	858	2	19	8	0	1	10	4	27	14	14	6	11	17.983	13.6642	13.422	10.6133	12.0266	10.6934	15.8767	12.2328	15.2158	16.5286	15.373	13.4503	0.27986	1.7205	1.73635	0	0.334854	2.73188	0.645974	7.86857	3.17661	3.25882	2.45412
T06E4.3b.2	WBGene00000226	atl-1	1024	807	741	659	684	653	1045	690	705	1009	959	858	2	19	8	0	1	10	4	27	14	14	6	11	17.983	13.6642	13.422	10.6133	12.0266	10.6934	15.8767	12.2328	15.2158	16.5286	15.373	13.4503	0.27986	1.7205	1.73635	0	0.334854	2.73188	0.645974	7.86857	3.17661	3.25882	2.45412
T06E4.3c.1	WBGene00000226	atl-1	607	478	475	407	431	425	614	435	405	554	507	511	2	11	1	0	1	0	0	15	3	0	3	3	10.6598	8.09354	8.60388	6.55478	7.57816	6.95973	9.32853	7.71197	8.74099	9.07518	8.12734	8.0106	0.27986	0.996081	0.217044	0	0.334854	0	0	4.37143	0.680702	0	1.22706
Y54G2A.2a.1	WBGene00021868	atln-1	2545	3037	2788	2857	2640	2996	2953	2665	2145	2701	3038	2891	937	1346	595	411	282	321	705	312	444	490	205	411	44.694	51.4228	50.5002	46.0123	46.4185	49.062	44.8651	47.2469	46.2949	44.2456	48.6999	45.3203	131.114	121.884	129.141	112.546	94.4287	87.6934	113.853	90.9256	100.744	114.059	83.8491
Y54G2A.2b.1	WBGene00021868	atln-1	2297	2819	2569	2608	2440	2739	2721	2442	1955	2486	2800	2692	682	1075	384	292	209	226	444	205	325	366	136	295	40.3387	47.7316	46.5334	42.0021	42.9019	44.8534	41.3403	43.2934	42.1942	40.7236	44.8847	42.2007	95.4322	97.3443	83.3449	79.9598	69.9844	61.7405	71.7031	59.7428	73.7427	85.1948	55.6267
Y54G2A.2c.1	WBGene00021868	atln-1	1416	1672	1481	1604	1427	1728	1724	1436	1225	1563	1658	1584	549	756	413	236	172	206	429	206	218	293	125	288	24.8671	28.3105	26.826	25.8326	25.0906	28.2974	26.1928	25.4584	26.4388	25.6038	26.5782	24.8313	76.8215	68.4579	89.6392	64.6251	57.5948	56.2768	69.2807	60.0342	49.4644	68.2024	51.1275
Y54G2A.2c.2	WBGene00021868	atln-1	1416	1672	1481	1604	1427	1728	1724	1436	1225	1563	1658	1584	549	756	413	236	172	206	429	206	218	293	125	288	24.8671	28.3105	26.826	25.8326	25.0906	28.2974	26.1928	25.4584	26.4388	25.6038	26.5782	24.8313	76.8215	68.4579	89.6392	64.6251	57.5948	56.2768	69.2807	60.0342	49.4644	68.2024	51.1275
Y54G2A.2c.3	WBGene00021868	atln-1	1416	1672	1481	1604	1427	1728	1724	1436	1225	1563	1658	1584	549	756	413	236	172	206	429	206	218	293	125	288	24.8671	28.3105	26.826	25.8326	25.0906	28.2974	26.1928	25.4584	26.4388	25.6038	26.5782	24.8313	76.8215	68.4579	89.6392	64.6251	57.5948	56.2768	69.2807	60.0342	49.4644	68.2024	51.1275
Y54G2A.2c.4	WBGene00021868	atln-1	1416	1672	1481	1604	1427	1728	1724	1436	1225	1563	1658	1584	549	756	413	236	172	206	429	206	218	293	125	288	24.8671	28.3105	26.826	25.8326	25.0906	28.2974	26.1928	25.4584	26.4388	25.6038	26.5782	24.8313	76.8215	68.4579	89.6392	64.6251	57.5948	56.2768	69.2807	60.0342	49.4644	68.2024	51.1275
Y54G2A.2d.1	WBGene00021868	atln-1	799	862	829	864	786	957	932	774	644	844	870	800	312	412	275	136	94	124	314	124	161	187	82	144	14.0316	14.5955	15.016	13.9148	13.82	15.6717	14.1599	13.722	13.8993	13.8257	13.9463	12.5411	43.6581	37.3078	59.6871	37.2416	31.4762	33.8753	50.7089	36.1371	36.531	43.5285	33.5396
Y54G2A.2d.2	WBGene00021868	atln-1	799	862	829	864	786	957	932	774	644	844	870	800	312	412	275	136	94	124	314	124	161	187	82	144	14.0316	14.5955	15.016	13.9148	13.82	15.6717	14.1599	13.722	13.8993	13.8257	13.9463	12.5411	43.6581	37.3078	59.6871	37.2416	31.4762	33.8753	50.7089	36.1371	36.531	43.5285	33.5396
Y41E3.3a.1	WBGene00012763	atln-2	96	117	113	74	100	90	84	70	88	81	113	142	5	5	5	0	6	22	0	0	1	2	2	1	1.6859	1.98105	2.04682	1.19178	1.75827	1.47383	1.27622	1.24101	1.89928	1.32688	1.81142	2.22604	0.699649	0.452764	1.08522	0	2.00912	6.01014	0	0	0.226901	0.465545	0.81804
Y41E3.3b.1	WBGene00012763	atln-2	63	90	93	56	82	67	65	52	66	61	91	108	2	5	5	0	0	22	0	0	1	0	2	1	1.10637	1.52389	1.68455	0.901886	1.44179	1.09718	0.987548	0.921891	1.42446	0.999253	1.45875	1.69304	0.27986	0.452764	1.08522	0	0	6.01014	0	0	0.226901	0	0.81804
Y41E3.3b.2	WBGene00012763	atln-2	63	90	93	56	82	67	65	52	66	61	91	108	2	5	5	0	0	22	0	0	1	0	2	1	1.10637	1.52389	1.68455	0.901886	1.44179	1.09718	0.987548	0.921891	1.42446	0.999253	1.45875	1.69304	0.27986	0.452764	1.08522	0	0	6.01014	0	0	0.226901	0	0.81804
Y41E3.3c.1	WBGene00012763	atln-2	86	102	102	66	88	78	77	62	82	73	102	121	5	5	5	0	6	17	0	0	1	2	0	0	1.51029	1.72707	1.84757	1.06294	1.54728	1.27732	1.16986	1.09918	1.76978	1.19583	1.63509	1.89684	0.699649	0.452764	1.08522	0	2.00912	4.6442	0	0	0.226901	0.465545	0
Y41E3.3d.1	WBGene00012763	atln-2	53	75	82	48	70	55	58	44	60	53	80	87	2	5	5	0	0	17	0	0	1	0	0	0	0.930759	1.26991	1.4853	0.773045	1.23079	0.900671	0.881197	0.780061	1.29496	0.868203	1.28242	1.36384	0.27986	0.452764	1.08522	0	0	4.6442	0	0	0.226901	0	0
Y41E3.3d.2	WBGene00012763	atln-2	53	75	82	48	70	55	58	44	60	53	80	87	2	5	5	0	0	17	0	0	1	0	0	0	0.930759	1.26991	1.4853	0.773045	1.23079	0.900671	0.881197	0.780061	1.29496	0.868203	1.28242	1.36384	0.27986	0.452764	1.08522	0	0	4.6442	0	0	0.226901	0	0
Y48G1BL.2a.1	WBGene00000227	atm-1	824	594	584	555	542	513	840	709	613	526	525	542	8	17	19	0	3	14	9	0	5	0	4	3	14.4707	10.0577	10.5782	8.93834	9.52985	8.4008	12.7622	12.5696	13.2302	8.61651	8.41588	8.49657	1.11944	1.5394	4.12384	0	1.00456	3.82464	1.45344	0	1.1345	0	1.63608
Y48G1BL.2b.1	WBGene00000227	atm-1	585	432	410	403	362	339	579	490	410	385	347	375	6	13	15	0	0	14	0	0	2	0	0	1	10.2735	7.31466	7.4265	6.49036	6.36496	5.55141	8.79677	8.68705	8.8489	6.30676	5.5625	5.87862	0.839579	1.17719	3.25566	0	0	3.82464	0	0	0.453801	0	0
W04D2.1a.1	WBGene00000228	atn-1	6062	7264	6709	7242	6434	7032	8310	6900	6486	8424	8889	8877	1039	2228	878	725	534	569	909	688	915	820	563	612	106.458	122.995	121.523	116.633	113.127	115.155	126.254	122.328	139.985	137.995	142.493	139.159	145.387	201.752	190.565	198.53	178.812	155.444	146.798	200.503	207.614	190.874	230.278
W04D2.1b.1	WBGene00000228	atn-1	6024	7212	6662	7202	6401	7004	8252	6859	6446	8386	8843	8821	988	2198	877	705	504	553	907	699	905	777	557	605	105.79	122.114	120.672	115.989	112.547	114.696	125.373	121.601	139.122	137.373	141.756	138.281	138.251	199.035	190.348	193.054	168.766	151.073	146.475	203.708	205.345	180.864	227.824
W04D2.1c.1	WBGene00000228	atn-1	5718	6801	6261	6795	6047	6608	7808	6460	6138	7919	8335	8268	960	1876	685	651	460	471	768	569	744	693	470	491	100.417	115.155	113.408	109.434	106.323	108.212	118.627	114.527	132.475	129.723	133.612	129.612	134.333	169.877	148.675	178.267	154.033	128.672	124.027	165.823	168.814	161.311	192.239
W04D2.1d.1	WBGene00000228	atn-1	5680	6749	6214	6755	6014	6580	7750	6419	6098	7881	8289	8212	909	1846	684	631	430	455	766	580	734	650	464	484	99.7493	114.275	112.557	108.79	105.743	107.753	117.746	113.8	131.611	129.1	132.875	128.734	127.196	167.161	148.458	172.79	143.987	124.301	123.704	169.028	166.545	151.302	189.785
H28O16.1a.1	WBGene00010419	atp-1	22300	24453	20811	34143	33612	33156	45991	34627	31078	32410	33598	31674	8522	12569	3387	3958	3259	2956	7973	2335	3924	4952	1680	2968	391.621	414.04	376.959	549.877	590.991	542.957	698.743	613.891	670.747	530.914	538.584	496.532	1192.48	1138.16	735.128	1083.84	1091.29	807.544	1287.59	680.485	890.358	1152.69	687.154
H28O16.1a.2	WBGene00010419	atp-1	22300	24453	20811	34143	33612	33156	45991	34627	31078	32410	33598	31674	8522	12569	3387	3958	3259	2956	7973	2335	3924	4952	1680	2968	391.621	414.04	376.959	549.877	590.991	542.957	698.743	613.891	670.747	530.914	538.584	496.532	1192.48	1138.16	735.128	1083.84	1091.29	807.544	1287.59	680.485	890.358	1152.69	687.154
H28O16.1a.3	WBGene00010419	atp-1	22300	24453	20811	34143	33612	33156	45991	34627	31078	32410	33598	31674	8522	12569	3387	3958	3259	2956	7973	2335	3924	4952	1680	2968	391.621	414.04	376.959	549.877	590.991	542.957	698.743	613.891	670.747	530.914	538.584	496.532	1192.48	1138.16	735.128	1083.84	1091.29	807.544	1287.59	680.485	890.358	1152.69	687.154
H28O16.1a.4	WBGene00010419	atp-1	22300	24453	20811	34143	33612	33156	45991	34627	31078	32410	33598	31674	8522	12569	3387	3958	3259	2956	7973	2335	3924	4952	1680	2968	391.621	414.04	376.959	549.877	590.991	542.957	698.743	613.891	670.747	530.914	538.584	496.532	1192.48	1138.16	735.128	1083.84	1091.29	807.544	1287.59	680.485	890.358	1152.69	687.154
H28O16.1a.5	WBGene00010419	atp-1	22300	24453	20811	34143	33612	33156	45991	34627	31078	32410	33598	31674	8522	12569	3387	3958	3259	2956	7973	2335	3924	4952	1680	2968	391.621	414.04	376.959	549.877	590.991	542.957	698.743	613.891	670.747	530.914	538.584	496.532	1192.48	1138.16	735.128	1083.84	1091.29	807.544	1287.59	680.485	890.358	1152.69	687.154
H28O16.1a.6	WBGene00010419	atp-1	22300	24453	20811	34143	33612	33156	45991	34627	31078	32410	33598	31674	8522	12569	3387	3958	3259	2956	7973	2335	3924	4952	1680	2968	391.621	414.04	376.959	549.877	590.991	542.957	698.743	613.891	670.747	530.914	538.584	496.532	1192.48	1138.16	735.128	1083.84	1091.29	807.544	1287.59	680.485	890.358	1152.69	687.154
H28O16.1d.1	WBGene00010419	atp-1	22182	24315	20682	33985	33436	33028	45749	34406	30908	32264	33426	31477	8276	12340	3370	3815	3206	2888	7881	2276	3883	4874	1664	2937	389.549	411.704	374.622	547.332	587.897	540.861	695.067	609.973	667.078	528.523	535.827	493.444	1158.06	1117.42	731.438	1044.68	1073.54	788.968	1272.73	663.291	881.055	1134.53	680.609
H28O16.1d.10	WBGene00010419	atp-1	22182	24315	20682	33985	33436	33028	45749	34406	30908	32264	33426	31477	8276	12340	3370	3815	3206	2888	7881	2276	3883	4874	1664	2937	389.549	411.704	374.622	547.332	587.897	540.861	695.067	609.973	667.078	528.523	535.827	493.444	1158.06	1117.42	731.438	1044.68	1073.54	788.968	1272.73	663.291	881.055	1134.53	680.609
H28O16.1d.2	WBGene00010419	atp-1	22182	24315	20682	33985	33436	33028	45749	34406	30908	32264	33426	31477	8276	12340	3370	3815	3206	2888	7881	2276	3883	4874	1664	2937	389.549	411.704	374.622	547.332	587.897	540.861	695.067	609.973	667.078	528.523	535.827	493.444	1158.06	1117.42	731.438	1044.68	1073.54	788.968	1272.73	663.291	881.055	1134.53	680.609
H28O16.1d.3	WBGene00010419	atp-1	22182	24315	20682	33985	33436	33028	45749	34406	30908	32264	33426	31477	8276	12340	3370	3815	3206	2888	7881	2276	3883	4874	1664	2937	389.549	411.704	374.622	547.332	587.897	540.861	695.067	609.973	667.078	528.523	535.827	493.444	1158.06	1117.42	731.438	1044.68	1073.54	788.968	1272.73	663.291	881.055	1134.53	680.609
H28O16.1d.4	WBGene00010419	atp-1	22182	24315	20682	33985	33436	33028	45749	34406	30908	32264	33426	31477	8276	12340	3370	3815	3206	2888	7881	2276	3883	4874	1664	2937	389.549	411.704	374.622	547.332	587.897	540.861	695.067	609.973	667.078	528.523	535.827	493.444	1158.06	1117.42	731.438	1044.68	1073.54	788.968	1272.73	663.291	881.055	1134.53	680.609
H28O16.1d.5	WBGene00010419	atp-1	22182	24315	20682	33985	33436	33028	45749	34406	30908	32264	33426	31477	8276	12340	3370	3815	3206	2888	7881	2276	3883	4874	1664	2937	389.549	411.704	374.622	547.332	587.897	540.861	695.067	609.973	667.078	528.523	535.827	493.444	1158.06	1117.42	731.438	1044.68	1073.54	788.968	1272.73	663.291	881.055	1134.53	680.609
H28O16.1d.6	WBGene00010419	atp-1	22182	24315	20682	33985	33436	33028	45749	34406	30908	32264	33426	31477	8276	12340	3370	3815	3206	2888	7881	2276	3883	4874	1664	2937	389.549	411.704	374.622	547.332	587.897	540.861	695.067	609.973	667.078	528.523	535.827	493.444	1158.06	1117.42	731.438	1044.68	1073.54	788.968	1272.73	663.291	881.055	1134.53	680.609
H28O16.1d.7	WBGene00010419	atp-1	22182	24315	20682	33985	33436	33028	45749	34406	30908	32264	33426	31477	8276	12340	3370	3815	3206	2888	7881	2276	3883	4874	1664	2937	389.549	411.704	374.622	547.332	587.897	540.861	695.067	609.973	667.078	528.523	535.827	493.444	1158.06	1117.42	731.438	1044.68	1073.54	788.968	1272.73	663.291	881.055	1134.53	680.609
H28O16.1d.8	WBGene00010419	atp-1	22182	24315	20682	33985	33436	33028	45749	34406	30908	32264	33426	31477	8276	12340	3370	3815	3206	2888	7881	2276	3883	4874	1664	2937	389.549	411.704	374.622	547.332	587.897	540.861	695.067	609.973	667.078	528.523	535.827	493.444	1158.06	1117.42	731.438	1044.68	1073.54	788.968	1272.73	663.291	881.055	1134.53	680.609
H28O16.1d.9	WBGene00010419	atp-1	22182	24315	20682	33985	33436	33028	45749	34406	30908	32264	33426	31477	8276	12340	3370	3815	3206	2888	7881	2276	3883	4874	1664	2937	389.549	411.704	374.622	547.332	587.897	540.861	695.067	609.973	667.078	528.523	535.827	493.444	1158.06	1117.42	731.438	1044.68	1073.54	788.968	1272.73	663.291	881.055	1134.53	680.609
C34E10.6.1	WBGene00000229	atp-2	35818	38772	39436	55302	48578	55534	75603	66020	54648	53718	55920	60625	5562	9025	2287	3006	3430	2249	6015	1679	3679	4160	1801	2354	629.017	656.491	714.321	890.645	854.135	909.416	1148.64	1170.45	1179.45	879.965	896.412	950.377	778.29	817.239	496.38	823.148	1148.55	614.4	971.383	489.308	834.768	968.334	736.645
C34E10.6.2	WBGene00000229	atp-2	35818	38772	39436	55302	48578	55534	75603	66020	54648	53718	55920	60625	5562	9025	2287	3006	3430	2249	5998	1679	3673	4160	1792	2353	629.017	656.491	714.321	890.645	854.135	909.416	1148.64	1170.45	1179.45	879.965	896.412	950.377	778.29	817.239	496.38	823.148	1148.55	614.4	968.637	489.308	833.406	968.334	732.964
C34E10.6.3	WBGene00000229	atp-2	35818	38772	39436	55302	48578	55534	75603	66020	54648	53718	55920	60625	5562	9025	2287	3006	3430	2249	6015	1679	3679	4160	1801	2354	629.017	656.491	714.321	890.645	854.135	909.416	1148.64	1170.45	1179.45	879.965	896.412	950.377	778.29	817.239	496.38	823.148	1148.55	614.4	971.383	489.308	834.768	968.334	736.645
F27C1.7a.1	WBGene00000230	atp-3	5910	7124	7520	7196	6863	8068	10375	10886	7730	7418	8733	8873	1383	2017	754	831	617	582	1540	1074	1317	1121	771	701	103.788	120.624	136.213	115.892	120.67	132.12	157.628	192.994	166.834	121.516	139.992	139.096	193.523	182.645	163.651	227.557	206.605	158.996	248.7	312.994	298.828	260.938	315.354
F27C1.7a.2	WBGene00000230	atp-3	5910	7124	7520	7196	6863	8068	10375	10886	7730	7418	8733	8873	1383	2017	754	831	617	582	1540	1074	1317	1121	771	701	103.788	120.624	136.213	115.892	120.67	132.12	157.628	192.994	166.834	121.516	139.992	139.096	193.523	182.645	163.651	227.557	206.605	158.996	248.7	312.994	298.828	260.938	315.354
F27C1.7a.3	WBGene00000230	atp-3	5910	7124	7520	7196	6863	8068	10375	10886	7730	7418	8733	8873	1383	2017	754	831	617	582	1540	1074	1317	1121	771	701	103.788	120.624	136.213	115.892	120.67	132.12	157.628	192.994	166.834	121.516	139.992	139.096	193.523	182.645	163.651	227.557	206.605	158.996	248.7	312.994	298.828	260.938	315.354
F27C1.7a.4	WBGene00000230	atp-3	5910	7124	7520	7196	6863	8068	10375	10886	7730	7418	8733	8873	1365	1988	746	813	605	582	1509	1074	1317	1110	771	701	103.788	120.624	136.213	115.892	120.67	132.12	157.628	192.994	166.834	121.516	139.992	139.096	191.004	180.019	161.915	222.628	202.586	158.996	243.694	312.994	298.828	258.378	315.354
F27C1.7a.5	WBGene00000230	atp-3	5910	7124	7520	7196	6863	8068	10375	10886	7730	7418	8733	8873	1383	2017	754	831	617	582	1599	1188	1407	1121	841	702	103.788	120.624	136.213	115.892	120.67	132.12	157.628	192.994	166.834	121.516	139.992	139.096	193.523	182.645	163.651	227.557	206.605	158.996	258.228	346.217	319.249	260.938	343.986
F27C1.7b.1	WBGene00000230	atp-3	5910	7124	7520	7196	6863	8068	10375	10886	7731	7418	8733	8874	1383	2017	754	831	617	582	1540	1074	1317	1121	771	701	103.788	120.624	136.213	115.892	120.67	132.12	157.628	192.994	166.856	121.516	139.992	139.112	193.523	182.645	163.651	227.557	206.605	158.996	248.7	312.994	298.828	260.938	315.354
T05H4.12.1	WBGene00020275	atp-4	3042	3800	3929	3945	3726	4449	5318	5933	4211	3838	4622	4509	345	520	200	207	97	222	382	201	313	180	181	161	53.4221	64.342	71.1677	63.5347	65.5133	72.8561	80.7966	105.184	90.8847	62.871	74.0918	70.6846	48.2758	47.0875	43.4088	56.6839	32.4808	60.6478	61.6905	58.5771	71.0199	41.8991	74.0326
T05H4.12.2	WBGene00020275	atp-4	3042	3800	3929	3945	3726	4449	5318	5933	4211	3838	4622	4509	345	520	200	207	97	222	382	201	313	180	181	161	53.4221	64.342	71.1677	63.5347	65.5133	72.8561	80.7966	105.184	90.8847	62.871	74.0918	70.6846	48.2758	47.0875	43.4088	56.6839	32.4808	60.6478	61.6905	58.5771	71.0199	41.8991	74.0326
T05H4.12.3	WBGene00020275	atp-4	3042	3800	3929	3945	3726	4449	5318	5933	4211	3838	4622	4509	345	520	200	207	97	222	382	201	313	180	181	161	53.4221	64.342	71.1677	63.5347	65.5133	72.8561	80.7966	105.184	90.8847	62.871	74.0918	70.6846	48.2758	47.0875	43.4088	56.6839	32.4808	60.6478	61.6905	58.5771	71.0199	41.8991	74.0326
C06H2.1.1	WBGene00007385	atp-5	6805	7636	7850	8961	7914	9686	11024	10925	8491	9557	9939	10374	640	1037	556	481	249	275	619	502	860	433	355	346	119.506	129.293	142.19	144.318	139.15	158.616	167.488	193.686	183.259	156.555	159.325	162.626	89.5551	93.9033	120.676	131.715	83.3786	75.1268	99.9644	146.297	195.135	100.791	145.202
C06H2.1.2	WBGene00007385	atp-5	6805	7636	7850	8961	7914	9686	11024	10925	8491	9557	9939	10374	640	1037	556	481	249	275	619	502	860	433	355	346	119.506	129.293	142.19	144.318	139.15	158.616	167.488	193.686	183.259	156.555	159.325	162.626	89.5551	93.9033	120.676	131.715	83.3786	75.1268	99.9644	146.297	195.135	100.791	145.202
MTCE.12.1	WBGene00010960	atp-6	877	1181	880	2211	2073	2930	4413	6125	4880	2505	3454	1777	7	0	0	8	0	0	4	0	2	8	0	2	15.4014	19.9968	15.9398	35.6084	36.449	47.9812	67.0469	108.588	105.324	41.0349	55.3685	27.8568	0.979509	0	0	2.19068	0	0	0.645974	0	0.453801	1.86218	0
F33C8.1.1	WBGene00006432	atrn-1	1712	1892	1499	1752	1615	1578	2120	1481	1353	1804	1819	1559	100	214	60	50	33	28	132	14	33	84	63	31	30.0653	32.0355	27.152	28.2162	28.3961	25.8411	32.2093	26.2562	29.2014	29.5517	29.159	24.4394	13.993	19.3783	13.0226	13.6918	11.0502	7.64927	21.3171	4.08	7.48772	19.5529	25.7683
F09G2.9.1	WBGene00017317	attf-2	778	694	713	742	650	728	921	736	589	721	784	859	161	184	76	112	47	76	95	76	121	91	49	60	13.6628	11.7509	12.9149	11.95	11.4288	11.9216	13.9928	13.0483	12.7122	11.8108	12.5677	13.466	22.5287	16.6617	16.4953	30.6695	15.7381	20.7623	15.3419	22.1486	27.455	21.1823	20.042
F54C4.3.1	WBGene00018794	attf-3	510	416	357	393	405	442	426	409	315	449	489	473	19	34	15	11	13	0	9	21	7	5	9	16	8.95636	7.04375	6.46649	6.32931	7.12101	7.23812	6.47224	7.25103	6.79855	7.35515	7.83879	7.4149	2.65867	3.0788	3.25566	3.01219	4.3531	0	1.45344	6.12	1.5883	1.16386	3.68118
C05D10.1a.1	WBGene00015477	attf-4	761	810	745	677	528	617	702	646	523	688	605	713	65	114	44	62	22	52	119	88	38	18	51	59	13.3643	13.715	13.4945	10.9032	9.28369	10.1039	10.6655	11.4527	11.2877	11.2703	9.6983	11.1772	9.09544	10.323	9.54994	16.9778	7.36678	14.2058	19.2177	25.6457	8.62223	4.18991	20.86
C05D10.1b.1	WBGene00015477	attf-4	732	782	724	657	513	590	677	623	502	671	591	695	24	44	15	62	10	10	55	58	18	5	20	36	12.855	13.2409	13.1141	10.5811	9.01995	9.66174	10.2857	11.045	10.8345	10.9918	9.47388	10.895	3.35832	3.98432	3.25566	16.9778	3.34854	2.73188	8.88214	16.9028	4.08421	1.16386	8.1804
C05D10.1c.1	WBGene00015477	attf-4	713	770	713	662	508	592	674	621	499	665	580	671	64	114	44	41	18	52	119	88	38	18	34	54	12.5213	13.0377	12.9149	10.6616	8.93204	9.69449	10.2401	11.0095	10.7698	10.8935	9.29755	10.5188	8.95551	10.323	9.54994	11.2272	6.02737	14.2058	19.2177	25.6457	8.62223	4.18991	13.9067
C05D10.1c.2	WBGene00015477	attf-4	713	770	713	662	508	592	674	621	499	665	580	671	64	114	44	41	18	52	119	88	38	18	34	54	12.5213	13.0377	12.9149	10.6616	8.93204	9.69449	10.2401	11.0095	10.7698	10.8935	9.29755	10.5188	8.95551	10.323	9.54994	11.2272	6.02737	14.2058	19.2177	25.6457	8.62223	4.18991	13.9067
T04G9.1a.1	WBGene00020214	attf-5	491	478	431	348	384	337	414	316	310	387	381	404	17	16	4	16	6	0	5	9	17	12	3	10	8.62269	8.09354	7.80689	5.60458	6.75178	5.51866	6.28992	5.60226	6.69063	6.33952	6.10753	6.33324	2.37881	1.44885	0.868176	4.38136	2.00912	0	0.807467	2.62286	3.85731	2.79327	1.22706
T04G9.1b.1	WBGene00020214	attf-5	491	478	431	348	384	337	414	316	310	387	381	404	17	16	4	16	6	0	5	9	17	12	3	10	8.62269	8.09354	7.80689	5.60458	6.75178	5.51866	6.28992	5.60226	6.69063	6.33952	6.10753	6.33324	2.37881	1.44885	0.868176	4.38136	2.00912	0	0.807467	2.62286	3.85731	2.79327	1.22706
Y18D10A.1.1	WBGene00012474	attf-6	415	333	301	296	297	330	398	326	259	360	388	351	12	18	13	9	0	0	11	0	9	14	8	4	7.28802	5.63839	5.45214	4.76711	5.22208	5.40403	6.04683	5.77955	5.58992	5.89723	6.21974	5.50239	1.67916	1.62995	2.82157	2.46452	0	0	1.77643	0	2.04211	3.25882	3.27216
D2045.1a.1	WBGene00000231	atx-2	3586	3488	2791	3108	2930	3129	3618	2504	2223	3203	3044	2989	360	603	166	204	195	133	320	84	181	223	94	115	62.9755	59.0591	50.5546	50.0547	51.5175	51.24	54.9684	44.3926	47.9783	52.469	48.7961	46.8565	50.3748	54.6034	36.0293	55.8624	65.2965	36.334	51.6779	24.48	41.069	51.9083	38.4479
D2045.1b.1	WBGene00000231	atx-2	2954	2902	2331	2545	2393	2502	3009	1980	1820	2586	2436	2356	201	417	71	189	126	72	99	43	91	136	17	46	51.8766	49.1369	42.2224	40.9875	42.0755	40.9723	45.7159	35.1028	39.2805	42.3618	39.0497	36.9334	28.1259	37.7605	15.4101	51.7548	42.1916	19.6696	15.9878	12.5314	20.648	31.6571	6.95334
D2045.1c.1	WBGene00000231	atx-2	3559	3455	2760	3084	2903	3091	3593	2471	2207	3185	3016	2964	360	591	166	204	195	133	320	84	178	214	94	115	62.5013	58.5004	49.9931	49.6682	51.0427	50.6177	54.5886	43.8075	47.633	52.1741	48.3472	46.4646	50.3748	53.5167	36.0293	55.8624	65.2965	36.334	51.6779	24.48	40.3883	49.8133	38.4479
D2045.1d.1	WBGene00000231	atx-2	3586	3487	2790	3108	2930	3130	3618	2504	2224	3203	3044	2989	359	603	166	194	195	133	320	84	181	223	94	115	62.9755	59.0422	50.5365	50.0547	51.5175	51.2564	54.9684	44.3926	47.9999	52.469	48.7961	46.8565	50.2348	54.6034	36.0293	53.124	65.2965	36.334	51.6779	24.48	41.069	51.9083	38.4479
F28F8.6.1	WBGene00006446	atx-3	186	193	153	218	183	224	254	245	179	201	226	226	32	42	30	9	14	11	22	0	11	22	1	10	3.26644	3.26789	2.77135	3.51091	3.21764	3.66819	3.85903	4.34352	3.8633	3.29262	3.62284	3.54285	4.47776	3.80322	6.51132	2.46452	4.68795	3.00507	3.55286	0	2.49591	5.121	0.40902
F28F8.6.2	WBGene00006446	atx-3	186	193	153	218	183	224	254	245	179	201	226	226	32	42	30	9	14	11	22	0	11	22	1	10	3.26644	3.26789	2.77135	3.51091	3.21764	3.66819	3.85903	4.34352	3.8633	3.29262	3.62284	3.54285	4.47776	3.80322	6.51132	2.46452	4.68795	3.00507	3.55286	0	2.49591	5.121	0.40902
F28F8.6.3	WBGene00006446	atx-3	186	193	153	218	183	224	254	245	179	201	226	226	32	42	30	9	14	11	22	0	11	22	1	10	3.26644	3.26789	2.77135	3.51091	3.21764	3.66819	3.85903	4.34352	3.8633	3.29262	3.62284	3.54285	4.47776	3.80322	6.51132	2.46452	4.68795	3.00507	3.55286	0	2.49591	5.121	0.40902
F28D1.2.1	WBGene00009212	atz-1	6	1	2	1	1	2	0	1	0	0	3	3	0	0	0	0	0	0	0	0	0	0	0	0	0.105369	0.0169321	0.0362269	0.0161051	0.0175827	0.0327517	0	0.0177287	0	0	0.0480908	0.047029	0	0	0	0	0	0	0	0	0	0	0
M01G5.6.1	WBGene00044341	ave-1	44	45	49	59	54	55	50	35	34	40	49	59	34	16	9	12	1	11	31	0	8	13	13	0	0.772706	0.761944	0.887558	0.950202	0.949468	0.900671	0.759652	0.620503	0.733811	0.655248	0.785482	0.924903	4.75762	1.44885	1.9534	3.28602	0.334854	3.00507	5.0063	0	1.81521	3.02604	5.31726
M01G5.6.2	WBGene00044341	ave-1	44	45	49	59	54	55	50	35	34	40	49	59	34	16	9	12	1	11	31	0	8	13	13	0	0.772706	0.761944	0.887558	0.950202	0.949468	0.900671	0.759652	0.620503	0.733811	0.655248	0.785482	0.924903	4.75762	1.44885	1.9534	3.28602	0.334854	3.00507	5.0063	0	1.81521	3.02604	5.31726
B0207.12a.1	WBGene00000232	avr-14	84	102	85	82	91	85	119	91	98	119	140	102	19	18	12	0	0	21	13	16	9	11	2	12	1.47517	1.72707	1.53964	1.32062	1.60003	1.39195	1.80797	1.61331	2.1151	1.94936	2.24424	1.59899	2.65867	1.62995	2.60453	0	0	5.73695	2.09941	4.66285	2.04211	2.5605	0.81804
B0207.12a.2	WBGene00000232	avr-14	84	102	85	82	91	85	119	91	98	119	140	102	19	18	12	0	0	21	13	16	9	11	2	12	1.47517	1.72707	1.53964	1.32062	1.60003	1.39195	1.80797	1.61331	2.1151	1.94936	2.24424	1.59899	2.65867	1.62995	2.60453	0	0	5.73695	2.09941	4.66285	2.04211	2.5605	0.81804
B0207.12b.1	WBGene00000232	avr-14	105	104	97	95	114	98	137	100	121	133	183	115	22	27	12	0	0	21	10	16	9	11	2	16	1.84396	1.76094	1.757	1.52999	2.00443	1.60483	2.08145	1.77287	2.61151	2.1787	2.93354	1.80278	3.07846	2.44493	2.60453	0	0	5.73695	1.61493	4.66285	2.04211	2.5605	0.81804
B0207.12c.1	WBGene00000232	avr-14	46	56	54	43	63	55	67	56	79	75	93	67	19	18	12	0	0	21	0	16	9	11	2	12	0.807829	0.948197	0.978125	0.69252	1.10771	0.900671	1.01793	0.992805	1.70503	1.22859	1.49081	1.05031	2.65867	1.62995	2.60453	0	0	5.73695	0	4.66285	2.04211	2.5605	0.81804
R11G10.1a.1	WBGene00000233	avr-15	440	617	499	490	507	503	540	438	435	519	627	614	88	148	107	123	26	97	113	136	55	36	48	56	7.72706	10.4471	9.0386	7.89151	8.91445	8.23704	8.20424	7.76516	9.38847	8.50184	10.051	9.62526	12.3138	13.4018	23.2237	33.6817	8.7062	26.4993	18.2488	39.6343	12.4795	8.37981	19.633
R11G10.1b.1	WBGene00000233	avr-15	413	591	456	465	491	477	518	416	409	491	600	577	88	148	107	123	26	104	113	136	51	36	48	53	7.2529	10.0069	8.25972	7.48888	8.63313	7.81127	7.87	7.37513	8.82732	8.04316	9.61815	9.04524	12.3138	13.4018	23.2237	33.6817	8.7062	28.4116	18.2488	39.6343	11.5719	8.37981	19.633
R11G10.1b.2	WBGene00000233	avr-15	413	591	456	465	491	477	518	416	409	491	600	577	88	148	107	123	26	104	113	136	51	36	48	53	7.2529	10.0069	8.25972	7.48888	8.63313	7.81127	7.87	7.37513	8.82732	8.04316	9.61815	9.04524	12.3138	13.4018	23.2237	33.6817	8.7062	28.4116	18.2488	39.6343	11.5719	8.37981	19.633
R11G10.1c.1	WBGene00000233	avr-15	207	303	245	266	275	256	295	235	232	269	286	312	32	87	40	46	8	42	55	58	12	14	30	15	3.63523	5.13042	4.43779	4.28396	4.83526	4.19221	4.48195	4.16624	5.00718	4.40654	4.58465	4.89101	4.47776	7.8781	8.68176	12.5964	2.67883	11.4739	8.88214	16.9028	2.72281	3.25882	12.2706
K02B12.4a.1	WBGene00010497	axl-1	48	50	52	58	47	79	49	43	40	67	72	98	0	0	2	0	0	0	0	10	0	0	3	0	0.842952	0.846605	0.941898	0.934097	0.826389	1.29369	0.744459	0.762333	0.863307	1.09754	1.15418	1.53628	0	0	0.434088	0	0	0	0	2.91428	0	0	1.22706
K02B12.4b.1	WBGene00010497	axl-1	56	59	56	63	52	78	55	49	45	72	75	104	0	0	2	0	0	0	0	10	0	0	3	0	0.983444	0.998993	1.01435	1.01462	0.914303	1.27732	0.835618	0.868705	0.971221	1.17945	1.20227	1.63034	0	0	0.434088	0	0	0	0	2.91428	0	0	1.22706
B0001.2.1	WBGene00007087	B0001.2	1408	1048	998	1200	1110	1060	699	597	464	417	364	429	81	87	36	49	66	46	76	24	42	10	22	32	24.7266	17.7448	18.0772	19.3261	19.5169	17.3584	10.6199	10.584	10.0144	6.83096	5.83501	6.72514	11.3343	7.8781	7.81358	13.4179	22.1003	12.5667	12.2735	6.99428	9.52983	2.32773	8.99844
B0001.3a.1	WBGene00007088	B0001.3	386	359	347	415	403	409	517	483	389	452	446	443	23	24	7	11	9	12	12	0	19	10	16	11	6.77874	6.07862	6.28536	6.68362	7.08585	6.69772	7.8548	8.56295	8.39567	7.4043	7.14949	6.94461	3.21839	2.17327	1.51931	3.01219	3.01368	3.27826	1.93792	0	4.31111	2.32773	6.54432
B0001.3b.1	WBGene00007088	B0001.3	386	359	347	415	403	409	517	483	389	452	446	443	23	24	7	11	9	12	12	0	19	10	16	11	6.77874	6.07862	6.28536	6.68362	7.08585	6.69772	7.8548	8.56295	8.39567	7.4043	7.14949	6.94461	3.21839	2.17327	1.51931	3.01219	3.01368	3.27826	1.93792	0	4.31111	2.32773	6.54432
B0001.3c.1	WBGene00007088	B0001.3	386	359	347	415	403	409	517	483	389	452	446	443	23	24	7	11	9	12	12	0	14	10	16	11	6.77874	6.07862	6.28536	6.68362	7.08585	6.69772	7.8548	8.56295	8.39567	7.4043	7.14949	6.94461	3.21839	2.17327	1.51931	3.01219	3.01368	3.27826	1.93792	0	3.17661	2.32773	6.54432
B0001.4a.1	WBGene00007089	B0001.4	192	208	172	214	245	244	191	210	171	181	209	250	35	87	36	0	23	66	61	30	60	30	29	20	3.37181	3.52188	3.11551	3.44649	4.30777	3.9957	2.90187	3.72302	3.69064	2.965	3.35032	3.91908	4.89755	7.8781	7.81358	0	7.70163	18.0304	9.8511	8.74285	13.614	6.98318	11.8616
B0001.4c.1	WBGene00007089	B0001.4	187	202	169	205	235	238	190	204	162	173	203	240	29	77	32	0	12	66	61	30	60	29	22	20	3.284	3.42028	3.06117	3.30155	4.13195	3.89745	2.88668	3.61665	3.4964	2.83395	3.25414	3.76232	4.05797	6.97257	6.94541	0	4.01824	18.0304	9.8511	8.74285	13.614	6.75041	8.99844
B0001.5.1	WBGene00007090	B0001.5	222	252	201	251	197	205	272	219	185	277	236	234	3	23	0	0	0	0	12	0	3	0	0	7	3.89865	4.26689	3.6408	4.04238	3.4638	3.35705	4.13251	3.88258	3.9928	4.53759	3.78314	3.66826	0.41979	2.08272	0	0	0	0	1.93792	0	0.680702	0	0
B0001.7a.1	WBGene00007092	B0001.7	43	10	10	14	9	10	7	13	11	8	17	18	3	0	0	0	0	0	0	0	0	0	0	0	0.755144	0.169321	0.181134	0.225472	0.158245	0.163758	0.106351	0.230473	0.23741	0.13105	0.272514	0.282174	0.41979	0	0	0	0	0	0	0	0	0	0
B0001.7b.1	WBGene00007092	B0001.7	43	10	10	14	9	10	7	13	11	8	17	18	3	0	0	0	0	0	0	0	0	0	0	0	0.755144	0.169321	0.181134	0.225472	0.158245	0.163758	0.106351	0.230473	0.23741	0.13105	0.272514	0.282174	0.41979	0	0	0	0	0	0	0	0	0	0
B0001.7c.1	WBGene00007092	B0001.7	5	0	2	0	3	3	2	7	4	1	6	2	3	0	0	0	0	0	0	0	0	0	0	0	0.0878075	0	0.0362269	0	0.0527482	0.0491275	0.0303861	0.124101	0.0863307	0.0163812	0.0961815	0.0313527	0.41979	0	0	0	0	0	0	0	0	0	0
B0001.8a.1	WBGene00007093	B0001.8	155	130	124	131	163	142	171	155	124	134	145	130	6	28	10	0	11	30	0	14	4	24	0	5	2.72203	2.20117	2.24606	2.10977	2.86599	2.32537	2.59801	2.74794	2.67625	2.19508	2.32439	2.03792	0.839579	2.53548	2.17044	0	3.68339	8.19565	0	4.08	0.907603	5.58654	0
B0001.8b.1	WBGene00007093	B0001.8	155	130	124	131	163	142	171	155	124	134	145	130	5	28	10	0	11	30	0	14	0	18	0	5	2.72203	2.20117	2.24606	2.10977	2.86599	2.32537	2.59801	2.74794	2.67625	2.19508	2.32439	2.03792	0.699649	2.53548	2.17044	0	3.68339	8.19565	0	4.08	0	4.18991	0
B0001.8c.1	WBGene00007093	B0001.8	30	20	34	26	27	25	42	27	20	40	29	17	2	1	0	0	0	0	0	0	4	6	0	0	0.526845	0.338642	0.615857	0.418733	0.474734	0.409396	0.638108	0.478674	0.431654	0.655248	0.464877	0.266498	0.27986	0.0905528	0	0	0	0	0	0	0.907603	1.39664	0
B0001.8c.2	WBGene00007093	B0001.8	30	20	34	26	27	25	42	27	20	40	29	17	2	1	0	0	0	0	0	0	4	6	0	0	0.526845	0.338642	0.615857	0.418733	0.474734	0.409396	0.638108	0.478674	0.431654	0.655248	0.464877	0.266498	0.27986	0.0905528	0	0	0	0	0	0	0.907603	1.39664	0
B0001.8d.1	WBGene00007093	B0001.8	100	84	73	81	104	95	107	105	82	80	96	88	4	20	10	0	11	30	0	14	0	18	0	5	1.75615	1.4223	1.32228	1.30451	1.82861	1.5557	1.62566	1.86151	1.76978	1.3105	1.5389	1.37952	0.55972	1.81106	2.17044	0	3.68339	8.19565	0	4.08	0	4.18991	0
B0019.2.1	WBGene00007094	B0019.2	273	282	235	282	281	292	280	270	199	240	268	265	4	20	14	21	2	13	14	20	14	7	5	2	4.79429	4.77485	4.25666	4.54164	4.94075	4.78174	4.25405	4.78674	4.29495	3.93149	4.29611	4.15423	0.55972	1.81106	3.03862	5.75054	0.669707	3.55145	2.26091	5.82857	3.17661	1.62941	2.0451
B0024.11.1	WBGene00007101	B0024.11	167	163	133	482	486	473	561	627	421	520	563	576	8	13	13	31	29	23	69	38	32	66	21	59	2.93277	2.75993	2.40909	7.76266	8.54522	7.74577	8.5233	11.1159	9.08631	8.51822	9.02503	9.02956	1.11944	1.17719	2.82157	8.48889	9.71076	6.28333	11.143	11.0743	7.26082	15.363	8.58942
B0024.13.1	WBGene00007102	B0024.13	120	146	126	135	116	146	164	158	110	151	152	117	14	25	11	35	5	0	32	9	9	6	9	19	2.10738	2.47209	2.28229	2.17419	2.0396	2.39087	2.49166	2.80113	2.3741	2.47356	2.4366	1.83413	1.95902	2.26382	2.38748	9.58423	1.67427	0	5.16779	2.62286	2.04211	1.39664	3.68118
B0024.15.1	WBGene00007104	B0024.15	19	12	6	5	2	8	10	10	13	14	27	15	0	1	0	0	2	0	0	0	0	0	0	0	0.333668	0.203185	0.108681	0.0805256	0.0351655	0.131007	0.15193	0.177287	0.280575	0.229337	0.432817	0.235145	0	0.0905528	0	0	0.669707	0	0	0	0	0	0
B0024.15.2	WBGene00007104	B0024.15	19	12	6	5	2	8	10	10	13	14	27	15	0	1	0	0	2	0	0	0	0	0	0	0	0.333668	0.203185	0.108681	0.0805256	0.0351655	0.131007	0.15193	0.177287	0.280575	0.229337	0.432817	0.235145	0	0.0905528	0	0	0.669707	0	0	0	0	0	0
B0024.3.1	WBGene00007096	B0024.3	7	10	3	3	3	9	14	4	10	14	17	8	8	13	0	0	0	0	0	0	0	5	2	3	0.12293	0.169321	0.0543403	0.0483153	0.0527482	0.147383	0.212703	0.0709147	0.215827	0.229337	0.272514	0.125411	1.11944	1.17719	0	0	0	0	0	0	0	1.16386	0.81804
B0024.4.1	WBGene00007097	B0024.4	200	217	216	123	108	109	215	157	125	134	141	80	16	51	43	28	2	7	19	10	5	15	6	3	3.5123	3.67426	3.9125	1.98093	1.89894	1.78497	3.2665	2.7834	2.69784	2.19508	2.26027	1.25411	2.23888	4.61819	9.33289	7.66738	0.669707	1.91232	3.06837	2.91428	1.1345	3.49159	2.45412
B0025.4.1	WBGene00015001	B0025.4	68	43	55	64	48	45	57	65	48	67	71	73	22	19	22	22	8	33	24	23	5	6	6	14	1.19418	0.72808	0.996238	1.03073	0.843972	0.736913	0.866004	1.15236	1.03597	1.09754	1.13815	1.14437	3.07846	1.7205	4.77497	6.02437	2.67883	9.01521	3.87584	6.70285	1.1345	1.39664	2.45412
B0025.5.1	WBGene00194700	B0025.5	0	0	3	4	2	2	1	3	5	6	4	4	0	0	0	0	0	0	0	0	0	0	0	0	0	0	0.0543403	0.0644205	0.0351655	0.0327517	0.015193	0.053186	0.107913	0.0982871	0.064121	0.0627053	0	0	0	0	0	0	0	0	0	0	0
B0034.1.1	WBGene00015002	B0034.1	18	18	16	15	23	25	31	30	27	26	31	26	8	7	0	0	2	8	9	0	3	8	4	2	0.316107	0.304778	0.289815	0.241577	0.404403	0.409396	0.470984	0.53186	0.582733	0.425911	0.496938	0.407584	1.11944	0.63387	0	0	0.669707	2.18551	1.45344	0	0.680702	1.86218	1.63608
B0034.2.1	WBGene00015003	B0034.2	0	0	0	0	0	0	0	0	0	0	1	0	0	0	0	0	0	0	0	0	0	0	0	0	0	0	0	0	0	0	0	0	0	0	0.0160303	0	0	0	0	0	0	0	0	0	0	0	0
B0034.4.1	WBGene00015004	B0034.4	1	2	1	3	3	4	3	4	3	3	4	0	0	3	0	0	0	0	0	0	0	0	0	0	0.0175615	0.0338642	0.0181134	0.0483153	0.0527482	0.0655033	0.0455791	0.0709147	0.0647481	0.0491436	0.064121	0	0	0.271658	0	0	0	0	0	0	0	0	0
B0034.5.1	WBGene00015005	B0034.5	9	10	16	25	12	9	15	11	6	20	17	29	0	3	0	0	0	0	0	0	0	0	0	2	0.158053	0.169321	0.289815	0.402628	0.210993	0.147383	0.227896	0.195015	0.129496	0.327624	0.272514	0.454613	0	0.271658	0	0	0	0	0	0	0	0	0
B0034.7.1	WBGene00044394	B0034.7	15	10	8	22	23	32	34	17	13	7	8	11	0	2	4	0	0	0	0	0	5	0	0	0	0.263422	0.169321	0.144907	0.354312	0.404403	0.524027	0.516564	0.301387	0.280575	0.114668	0.128242	0.17244	0	0.181106	0.868176	0	0	0	0	0	1.1345	0	0
B0035.13.1	WBGene00007112	B0035.13	1821	2414	2711	1675	1694	2125	1633	1888	1192	1555	2142	2038	234	456	213	152	77	87	123	171	137	43	122	100	31.9795	40.8741	49.1055	26.9761	29.7852	34.7986	24.8102	33.4717	25.7266	25.4728	34.3368	31.9484	32.7436	41.2921	46.2304	41.6229	25.7837	23.7674	19.8637	49.8343	31.0854	10.0092	49.9004
B0035.13.2	WBGene00007112	B0035.13	1821	2414	2711	1675	1694	2125	1633	1888	1192	1555	2142	2038	234	456	213	152	77	87	123	171	137	43	122	100	31.9795	40.8741	49.1055	26.9761	29.7852	34.7986	24.8102	33.4717	25.7266	25.4728	34.3368	31.9484	32.7436	41.2921	46.2304	41.6229	25.7837	23.7674	19.8637	49.8343	31.0854	10.0092	49.9004
B0035.15.1	WBGene00007113	B0035.15	164	181	150	153	167	179	378	340	274	213	217	200	9	20	0	11	4	0	12	58	35	21	14	8	2.88008	3.06471	2.71701	2.46408	2.93632	2.93127	5.74297	6.02775	5.91366	3.48919	3.47856	3.13527	1.25937	1.81106	0	3.01219	1.33941	0	1.93792	16.9028	7.94152	4.88822	5.72628
B0035.18.1	WBGene00044290	B0035.18	9	10	7	8	2	6	23	15	28	7	6	2	0	0	0	0	0	0	0	0	0	0	0	0	0.158053	0.169321	0.126794	0.128841	0.0351655	0.098255	0.34944	0.26593	0.604315	0.114668	0.0961815	0.0313527	0	0	0	0	0	0	0	0	0	0	0
B0035.21.1	WBGene00235095	B0035.21	0	0	0	1	0	0	0	0	0	0	1	2	0	0	0	0	0	0	0	0	0	0	0	0	0	0	0	0.0161051	0	0	0	0	0	0	0.0160303	0.0313527	0	0	0	0	0	0	0	0	0	0	0
B0035.22.1	WBGene00303031	B0035.22	0	2	3	3	1	1	1	3	1	0	1	2	0	0	0	0	0	0	0	0	0	0	0	0	0	0.0338642	0.0543403	0.0483153	0.0175827	0.0163758	0.015193	0.053186	0.0215827	0	0.0160303	0.0313527	0	0	0	0	0	0	0	0	0	0	0
B0035.3.1	WBGene00007106	B0035.3	149	157	109	225	195	202	164	154	121	191	157	150	36	19	12	0	6	20	1	26	10	11	8	7	2.61666	2.65834	1.97436	3.62365	3.42864	3.30792	2.49166	2.73022	2.61151	3.12881	2.51675	2.35145	5.03748	1.7205	2.60453	0	2.00912	5.46376	0.161493	7.57714	2.26901	2.5605	3.27216
B0041.1.1	WBGene00015006	B0041.1	0	0	0	2	2	0	0	1	2	2	0	0	0	0	0	0	0	0	0	0	0	0	0	0	0	0	0	0.0322102	0.0351655	0	0	0.0177287	0.0431654	0.0327624	0	0	0	0	0	0	0	0	0	0	0	0	0
B0041.11.1	WBGene00206362	B0041.11	10	10	11	6	4	7	6	7	1	3	11	4	0	0	0	0	0	0	0	0	0	0	0	0	0.175615	0.169321	0.199248	0.0966307	0.070331	0.114631	0.0911583	0.124101	0.0215827	0.0491436	0.176333	0.0627053	0	0	0	0	0	0	0	0	0	0	0
B0041.11.2	WBGene00206362	B0041.11	10	10	11	6	4	7	6	7	1	3	11	4	0	0	0	0	0	0	0	0	0	0	0	0	0.175615	0.169321	0.199248	0.0966307	0.070331	0.114631	0.0911583	0.124101	0.0215827	0.0491436	0.176333	0.0627053	0	0	0	0	0	0	0	0	0	0	0
B0041.11.3	WBGene00206362	B0041.11	10	10	11	6	4	7	6	7	1	3	11	4	0	0	0	0	0	0	0	0	0	0	0	0	0.175615	0.169321	0.199248	0.0966307	0.070331	0.114631	0.0911583	0.124101	0.0215827	0.0491436	0.176333	0.0627053	0	0	0	0	0	0	0	0	0	0	0
B0041.12.1	WBGene00303032	B0041.12	43	39	32	50	25	22	45	29	19	44	35	35	0	0	0	0	0	0	0	0	0	0	0	0	0.755144	0.660352	0.57963	0.805256	0.439569	0.360268	0.683687	0.514131	0.410071	0.720772	0.561059	0.548671	0	0	0	0	0	0	0	0	0	0	0
B0041.5a.1	WBGene00015009	B0041.5	1114	1081	811	956	869	856	969	789	625	898	938	861	17	69	14	24	0	28	40	9	14	13	7	3	19.5635	18.3036	14.69	15.3965	15.2794	14.0177	14.7221	13.9879	13.4892	14.7103	15.0364	13.4973	2.37881	6.24815	3.03862	6.57204	0	7.64927	6.45974	2.62286	3.17661	3.02604	2.86314
B0041.5c.1	WBGene00015009	B0041.5	1089	1056	794	927	850	840	951	776	611	887	917	835	11	54	14	17	0	28	40	9	14	10	4	3	19.1245	17.8803	14.3821	14.9294	14.9453	13.7557	14.4486	13.7574	13.187	14.5301	14.6997	13.0897	1.53923	4.88985	3.03862	4.6552	0	7.64927	6.45974	2.62286	3.17661	2.32773	1.63608
B0041.8.1	WBGene00015011	B0041.8	102	65	67	48	59	60	78	84	75	83	76	86	32	32	37	0	18	0	28	0	10	7	4	0	1.79127	1.10059	1.2136	0.773045	1.03738	0.98255	1.18506	1.48921	1.6187	1.35964	1.2183	1.34816	4.47776	2.89769	8.03063	0	6.02737	0	4.52182	0	2.26901	1.62941	1.63608
B0041.8.2	WBGene00015011	B0041.8	102	65	67	48	59	60	78	84	75	83	76	86	32	32	37	0	18	0	28	0	10	7	4	0	1.79127	1.10059	1.2136	0.773045	1.03738	0.98255	1.18506	1.48921	1.6187	1.35964	1.2183	1.34816	4.47776	2.89769	8.03063	0	6.02737	0	4.52182	0	2.26901	1.62941	1.63608
B0198.2a.1	WBGene00007115	B0198.2	27	26	31	26	24	34	30	26	24	20	33	23	3	4	8	0	0	0	0	0	3	2	0	5	0.47416	0.440234	0.561516	0.418733	0.421986	0.556778	0.455791	0.460945	0.517984	0.327624	0.528998	0.360556	0.41979	0.362211	1.73635	0	0	0	0	0	0.680702	0.465545	0
B0198.2b.1	WBGene00007115	B0198.2	27	30	37	28	25	34	37	32	26	22	35	24	3	4	8	0	0	0	0	0	3	2	0	5	0.47416	0.507963	0.670197	0.450943	0.439569	0.556778	0.562143	0.567317	0.56115	0.360386	0.561059	0.376232	0.41979	0.362211	1.73635	0	0	0	0	0	0.680702	0.465545	0
B0198.3a.1	WBGene00007116	B0198.3	101	131	116	92	108	84	115	90	72	104	117	109	1	28	0	0	5	0	12	0	10	17	0	5	1.77371	2.2181	2.10116	1.48167	1.89894	1.37557	1.7472	1.59558	1.55395	1.70364	1.87554	1.70872	0.13993	2.53548	0	0	1.67427	0	1.93792	0	2.26901	3.95713	0
B0198.3a.2	WBGene00007116	B0198.3	101	131	116	92	108	84	115	90	72	104	117	109	1	28	0	0	5	0	12	0	10	17	0	5	1.77371	2.2181	2.10116	1.48167	1.89894	1.37557	1.7472	1.59558	1.55395	1.70364	1.87554	1.70872	0.13993	2.53548	0	0	1.67427	0	1.93792	0	2.26901	3.95713	0
B0205.1a.1	WBGene00015017	B0205.1	218	160	142	152	192	139	198	180	128	202	181	187	8	8	7	0	3	10	8	0	14	7	4	3	3.82841	2.70913	2.57211	2.44798	3.37589	2.27624	3.00822	3.19116	2.76258	3.309	2.90148	2.93147	1.11944	0.724423	1.51931	0	1.00456	2.73188	1.29195	0	3.17661	1.62941	1.63608
B0205.1b.1	WBGene00015017	B0205.1	211	154	136	143	191	135	195	170	123	192	172	180	8	8	7	0	3	10	8	0	14	7	4	3	3.70547	2.60754	2.46343	2.30303	3.35831	2.21074	2.96264	3.01387	2.65467	3.14519	2.7572	2.82174	1.11944	0.724423	1.51931	0	1.00456	2.73188	1.29195	0	3.17661	1.62941	1.63608
B0205.10.1	WBGene00015024	B0205.10	0	1	0	1	1	1	0	6	1	0	0	1	0	0	0	0	0	0	0	0	0	0	0	0	0	0.0169321	0	0.0161051	0.0175827	0.0163758	0	0.106372	0.0215827	0	0	0.0156763	0	0	0	0	0	0	0	0	0	0	0
B0205.10.2	WBGene00015024	B0205.10	0	1	0	1	1	1	0	6	1	0	0	1	0	0	0	0	0	0	0	0	0	0	0	0	0	0.0169321	0	0.0161051	0.0175827	0.0163758	0	0.106372	0.0215827	0	0	0.0156763	0	0	0	0	0	0	0	0	0	0	0
B0205.12.1	WBGene00044413	B0205.12	83	124	116	82	72	98	116	149	112	84	136	130	11	11	6	18	4	0	0	22	6	5	0	6	1.4576	2.09958	2.10116	1.32062	1.26596	1.60483	1.76239	2.64157	2.41726	1.37602	2.18011	2.03792	1.53923	0.996081	1.30226	4.92903	1.33941	0	0	6.41142	1.3614	1.16386	0
B0205.13.1	WBGene00044644	B0205.13	41	37	51	47	33	38	475	426	393	47	31	41	42	48	49	19	16	30	463	491	404	17	25	20	0.720021	0.626487	0.923785	0.75694	0.580231	0.622282	7.2167	7.55241	8.482	0.769916	0.496938	0.642729	5.87706	4.34654	10.6352	5.20287	5.35766	8.19565	74.7715	143.091	91.6679	3.95713	10.2255
B0205.14.1	WBGene00044646	B0205.14	16	21	15	8	9	5	63	46	57	24	23	34	4	1	0	0	0	0	0	0	2	7	6	15	0.280984	0.355574	0.271701	0.128841	0.158245	0.0818792	0.957162	0.815519	1.23021	0.393149	0.368696	0.532995	0.55972	0.0905528	0	0	0	0	0	0	0.453801	1.62941	2.45412
B0205.4.1	WBGene00015019	B0205.4	17	23	12	21	10	20	20	19	14	20	19	27	0	12	0	0	0	0	10	0	15	3	5	0	0.298545	0.389438	0.217361	0.338207	0.175827	0.327517	0.303861	0.336845	0.302158	0.327624	0.304575	0.423261	0	1.08663	0	0	0	0	1.61493	0	3.40351	0.698318	2.0451
B0205.5.1	WBGene00015020	B0205.5	0	3	1	1	2	4	0	0	1	1	0	0	0	0	0	0	0	0	0	0	0	0	0	0	0	0.0507963	0.0181134	0.0161051	0.0351655	0.0655033	0	0	0.0215827	0.0163812	0	0	0	0	0	0	0	0	0	0	0	0	0
B0205.6.1	WBGene00015021	B0205.6	439	502	429	770	728	731	1211	1274	1073	844	817	783	63	108	43	88	44	85	135	57	137	53	38	63	7.70949	8.49991	7.77066	12.4009	12.8002	11.9707	18.3988	22.5863	23.1582	13.8257	13.0967	12.2746	8.81558	9.77971	9.33289	24.0975	14.7336	23.221	21.8016	16.6114	31.0854	12.3369	15.5428
B0205.8.1	WBGene00015022	B0205.8	59	53	61	45	60	70	71	71	49	68	72	46	119	107	46	47	41	21	88	11	27	47	14	41	1.03613	0.897401	1.10492	0.72473	1.05496	1.14631	1.07871	1.25874	1.05755	1.11392	1.15418	0.721111	16.6517	9.68915	9.98402	12.8702	13.729	5.73695	14.2114	3.20571	6.12632	10.9403	5.72628
B0205.8.2	WBGene00015022	B0205.8	59	53	61	45	60	70	71	71	49	68	72	46	119	107	46	47	41	21	88	11	27	47	14	41	1.03613	0.897401	1.10492	0.72473	1.05496	1.14631	1.07871	1.25874	1.05755	1.11392	1.15418	0.721111	16.6517	9.68915	9.98402	12.8702	13.729	5.73695	14.2114	3.20571	6.12632	10.9403	5.72628
B0205.9.1	WBGene00015023	B0205.9	240	201	203	246	192	213	266	257	163	222	250	276	15	38	44	39	11	0	30	44	11	34	11	5	4.21476	3.40335	3.67703	3.96186	3.37589	3.48805	4.04135	4.55627	3.51798	3.63662	4.00756	4.32667	2.09895	3.44101	9.54994	10.6796	3.68339	0	4.8448	12.8228	2.49591	7.91427	4.49922
B0207.1.1	WBGene00015026	B0207.1	0	1	1	0	0	0	0	0	0	1	0	0	0	0	0	0	0	0	0	0	0	0	0	0	0	0.0169321	0.0181134	0	0	0	0	0	0	0.0163812	0	0	0	0	0	0	0	0	0	0	0	0	0
B0207.10.1	WBGene00015033	B0207.10	2	2	5	2	4	2	1	2	1	2	4	2	1	0	6	0	0	0	8	0	0	0	0	0	0.035123	0.0338642	0.0905671	0.0322102	0.070331	0.0327517	0.015193	0.0354573	0.0215827	0.0327624	0.064121	0.0313527	0.13993	0	1.30226	0	0	0	1.29195	0	0	0	0
B0207.11.1	WBGene00015034	B0207.11	0	3	0	1	0	0	0	0	0	0	0	1	0	0	0	0	0	0	0	0	0	0	0	0	0	0.0507963	0	0.0161051	0	0	0	0	0	0	0	0.0156763	0	0	0	0	0	0	0	0	0	0	0
B0207.2.1	WBGene00015027	B0207.2	22	21	28	17	11	3	14	14	14	22	28	7	12	30	6	12	2	18	17	0	1	2	5	13	0.386353	0.355574	0.507176	0.273787	0.19341	0.0491275	0.212703	0.248201	0.302158	0.360386	0.448847	0.109734	1.67916	2.71658	1.30226	3.28602	0.669707	4.91739	2.74539	0	0.226901	0.465545	2.0451
B0207.5a.1	WBGene00015028	B0207.5	8	6	4	7	6	3	20	11	11	4	6	5	5	3	0	0	0	0	0	0	8	1	0	0	0.140492	0.101593	0.0724537	0.112736	0.105496	0.0491275	0.303861	0.195015	0.23741	0.0655248	0.0961815	0.0783816	0.699649	0.271658	0	0	0	0	0	0	1.81521	0.232773	0
B0207.5b.1	WBGene00015028	B0207.5	8	6	4	7	6	3	20	11	11	4	6	5	5	3	0	0	0	0	0	0	8	1	0	0	0.140492	0.101593	0.0724537	0.112736	0.105496	0.0491275	0.303861	0.195015	0.23741	0.0655248	0.0961815	0.0783816	0.699649	0.271658	0	0	0	0	0	0	1.81521	0.232773	0
B0207.6.1	WBGene00015029	B0207.6	47	38	32	43	45	60	60	41	52	46	76	58	7	12	1	0	16	48	25	8	16	15	2	12	0.82539	0.64342	0.57963	0.69252	0.791224	0.98255	0.911583	0.726875	1.1223	0.753535	1.2183	0.909227	0.979509	1.08663	0.217044	0	5.35766	13.113	4.03734	2.33143	3.63041	3.49159	0.81804
B0207.7.1	WBGene00015030	B0207.7	0	0	0	0	0	0	0	0	0	2	3	2	0	0	0	0	0	0	0	0	0	0	0	0	0	0	0	0	0	0	0	0	0	0.0327624	0.0480908	0.0313527	0	0	0	0	0	0	0	0	0	0	0
B0207.8.1	WBGene00015031	B0207.8	0	0	0	0	0	0	0	0	0	0	0	0	0	0	0	0	0	0	0	0	0	0	0	0	0	0	0	0	0	0	0	0	0	0	0	0	0	0	0	0	0	0	0	0	0	0	0
B0207.9.1	WBGene00015032	B0207.9	1	0	0	0	0	0	0	0	2	1	1	0	0	0	0	0	0	0	0	0	0	0	0	0	0.0175615	0	0	0	0	0	0	0	0.0431654	0.0163812	0.0160303	0	0	0	0	0	0	0	0	0	0	0	0
B0207.9.2	WBGene00015032	B0207.9	1	0	0	0	0	0	0	0	2	1	1	0	0	0	0	0	0	0	0	0	0	0	0	0	0.0175615	0	0	0	0	0	0	0	0.0431654	0.0163812	0.0160303	0	0	0	0	0	0	0	0	0	0	0	0
B0212.3.1	WBGene00015037	B0212.3	74	41	64	86	82	56	77	73	71	73	81	86	1	6	0	0	5	0	8	0	1	0	6	2	1.29955	0.694216	1.15926	1.38504	1.44179	0.917047	1.16986	1.29419	1.53237	1.19583	1.29845	1.34816	0.13993	0.543317	0	0	1.67427	0	1.29195	0	0.226901	0	2.45412
B0218.5.1	WBGene00015049	B0218.5	11	10	3	9	9	6	9	10	3	9	15	10	0	0	0	0	0	0	0	0	0	0	0	0	0.193176	0.169321	0.0543403	0.144946	0.158245	0.098255	0.136737	0.177287	0.0647481	0.147431	0.240454	0.156763	0	0	0	0	0	0	0	0	0	0	0
B0218.7.1	WBGene00015051	B0218.7	0	3	0	1	0	0	0	0	2	1	1	1	0	0	0	0	0	0	0	0	0	0	0	1	0	0.0507963	0	0.0161051	0	0	0	0	0.0431654	0.0163812	0.0160303	0.0156763	0	0	0	0	0	0	0	0	0	0	0
B0222.1.1	WBGene00015053	B0222.1	18	19	31	18	22	36	14	14	24	28	24	29	0	2	0	0	0	6	0	0	0	0	0	0	0.316107	0.32171	0.561516	0.289892	0.38682	0.58953	0.212703	0.248201	0.517984	0.458673	0.384726	0.454613	0	0.181106	0	0	0	1.63913	0	0	0	0	0
B0222.11.1	WBGene00044582	B0222.11	40	51	36	35	35	34	39	31	42	32	32	49	0	3	0	0	0	0	9	0	0	0	0	0	0.70246	0.863537	0.652083	0.563679	0.615396	0.556778	0.592529	0.549589	0.906473	0.524198	0.512968	0.76814	0	0.271658	0	0	0	0	1.45344	0	0	0	0
B0222.15.1	WBGene00235316	B0222.15	1	0	1	0	1	1	3	2	3	2	5	3	0	0	0	0	0	0	0	0	0	0	0	0	0.0175615	0	0.0181134	0	0.0175827	0.0163758	0.0455791	0.0354573	0.0647481	0.0327624	0.0801513	0.047029	0	0	0	0	0	0	0	0	0	0	0
B0222.5.1	WBGene00015056	B0222.5	379	530	381	574	580	553	646	521	544	679	693	600	213	287	95	97	76	46	296	131	147	105	87	123	6.65581	8.97401	6.90122	9.24433	10.198	9.05584	9.81471	9.23664	11.741	11.1228	11.109	9.4058	29.8051	25.9887	20.6192	26.562	25.4489	12.5667	47.8021	38.1771	33.3544	24.4411	35.5847
B0228.1.1	WBGene00015059	B0228.1	80	134	121	126	152	140	150	129	142	145	170	142	65	98	55	9	17	19	54	52	35	23	24	26	1.40492	2.2689	2.19172	2.02924	2.67258	2.29262	2.27896	2.287	3.06474	2.37527	2.72514	2.22604	9.09544	8.87418	11.9374	2.46452	5.69251	5.19058	8.72064	15.1543	7.94152	5.35377	9.81648
B0228.6.1	WBGene00015063	B0228.6	13	14	23	15	15	26	31	30	33	24	37	28	2	8	10	0	19	22	16	0	0	0	7	3	0.228299	0.237049	0.416609	0.241577	0.263741	0.425772	0.470984	0.53186	0.712229	0.393149	0.593119	0.438937	0.27986	0.724423	2.17044	0	6.36222	6.01014	2.58389	0	0	0	2.86314
B0228.7.1	WBGene00015064	B0228.7	393	469	527	483	444	583	698	891	491	681	775	957	75	112	70	46	22	13	121	70	72	101	59	58	6.90167	7.94115	9.54578	7.77877	7.80674	9.54711	10.6047	15.7962	10.5971	11.1556	12.4234	15.0022	10.4947	10.1419	15.1931	12.5964	7.36678	3.55145	19.5407	20.4	16.3369	23.51	24.1322
B0228.7.2	WBGene00015064	B0228.7	393	469	527	483	444	583	698	891	491	681	775	957	75	112	70	46	22	13	121	70	72	101	59	58	6.90167	7.94115	9.54578	7.77877	7.80674	9.54711	10.6047	15.7962	10.5971	11.1556	12.4234	15.0022	10.4947	10.1419	15.1931	12.5964	7.36678	3.55145	19.5407	20.4	16.3369	23.51	24.1322
B0228.7.3	WBGene00015064	B0228.7	393	469	527	483	444	583	698	891	491	681	775	957	75	112	70	46	22	13	121	70	72	101	59	58	6.90167	7.94115	9.54578	7.77877	7.80674	9.54711	10.6047	15.7962	10.5971	11.1556	12.4234	15.0022	10.4947	10.1419	15.1931	12.5964	7.36678	3.55145	19.5407	20.4	16.3369	23.51	24.1322
B0228.8.1	WBGene00015065	B0228.8	0	0	0	0	0	0	0	1	0	0	0	0	0	0	0	0	0	0	0	0	0	0	0	0	0	0	0	0	0	0	0	0.0177287	0	0	0	0	0	0	0	0	0	0	0	0	0	0	0
B0228.9.1	WBGene00015066	B0228.9	0	3	0	0	0	0	0	1	1	3	1	0	0	0	0	0	0	0	0	0	0	0	0	0	0	0.0507963	0	0	0	0	0	0.0177287	0.0215827	0.0491436	0.0160303	0	0	0	0	0	0	0	0	0	0	0	0
B0238.1.1	WBGene00015067	B0238.1	361	431	473	462	420	452	501	475	374	527	485	566	48	87	47	29	18	29	73	78	60	36	38	40	6.3397	7.29773	8.56765	7.44056	7.38475	7.40188	7.61172	8.42112	8.07193	8.63289	7.77467	8.8728	6.71663	7.8781	10.2011	7.94122	6.02737	7.92246	11.789	22.7314	13.614	8.37981	15.5428
B0238.11.1	WBGene00015075	B0238.11	131	59	73	106	91	90	91	119	97	101	110	120	6	15	17	0	7	0	56	101	25	10	10	19	2.30056	0.998993	1.32228	1.70714	1.60003	1.47383	1.38257	2.10971	2.09352	1.6545	1.76333	1.88116	0.839579	1.35829	3.68975	0	2.34398	0	9.04363	29.4343	5.67252	2.32773	4.0902
B0238.12.1	WBGene00015076	B0238.12	22	39	34	47	34	41	72	56	75	63	49	43	18	45	11	14	12	5	1	12	45	25	9	19	0.386353	0.660352	0.615857	0.75694	0.597813	0.671409	1.0939	0.992805	1.6187	1.03202	0.785482	0.674082	2.51874	4.07488	2.38748	3.83369	4.01824	1.36594	0.161493	3.49714	10.2105	5.81932	3.68118
B0238.15.1	WBGene00044537	B0238.15	0	0	0	0	0	0	0	0	0	0	0	0	0	0	0	0	0	0	0	0	0	0	0	0	0	0	0	0	0	0	0	0	0	0	0	0	0	0	0	0	0	0	0	0	0	0	0
B0238.7.1	WBGene00015071	B0238.7	0	1	0	0	0	0	0	0	0	0	0	0	0	0	0	0	0	0	0	0	0	0	0	0	0	0.0169321	0	0	0	0	0	0	0	0	0	0	0	0	0	0	0	0	0	0	0	0	0
B0238.9.1	WBGene00015073	B0238.9	37	3	1	9	4	2	21	21	10	3	6	1	0	0	0	0	0	0	9	0	0	0	0	0	0.649775	0.0507963	0.0181134	0.144946	0.070331	0.0327517	0.319054	0.372302	0.215827	0.0491436	0.0961815	0.0156763	0	0	0	0	0	0	1.45344	0	0	0	0
B0244.10a.1	WBGene00015085	B0244.10	121	128	113	83	84	101	137	101	95	104	111	63	0	0	10	0	0	0	0	0	0	0	0	0	2.12494	2.16731	2.04682	1.33672	1.47695	1.65396	2.08145	1.7906	2.05036	1.70364	1.77936	0.987609	0	0	2.17044	0	0	0	0	0	0	0	0
B0244.10b.1	WBGene00015085	B0244.10	50	48	42	31	27	30	47	33	27	38	36	26	0	0	0	0	0	0	0	0	0	0	0	0	0.878075	0.81274	0.760764	0.499258	0.474734	0.491275	0.714073	0.585046	0.582733	0.622485	0.577089	0.407584	0	0	0	0	0	0	0	0	0	0	0
B0244.11.1	WBGene00015086	B0244.11	0	0	0	0	0	0	0	0	0	0	0	0	0	0	0	0	0	0	0	0	0	0	0	0	0	0	0	0	0	0	0	0	0	0	0	0	0	0	0	0	0	0	0	0	0	0	0
B0244.15.1	WBGene00206513	B0244.15	4	0	1	6	4	3	5	3	1	3	6	2	0	0	0	0	0	0	0	0	0	0	0	0	0.070246	0	0.0181134	0.0966307	0.070331	0.0491275	0.0759652	0.053186	0.0215827	0.0491436	0.0961815	0.0313527	0	0	0	0	0	0	0	0	0	0	0
B0244.16.1	WBGene00271577	B0244.16	22	13	7	13	9	11	18	14	17	11	14	18	0	0	0	0	0	0	0	0	0	0	0	0	0.386353	0.220117	0.126794	0.209366	0.158245	0.180134	0.273475	0.248201	0.366906	0.180193	0.224424	0.282174	0	0	0	0	0	0	0	0	0	0	0
B0244.17.1	WBGene00271715	B0244.17	95	115	66	76	71	70	168	115	115	88	65	70	0	0	0	0	0	0	0	0	0	0	0	0	1.66834	1.94719	1.19549	1.22399	1.24838	1.14631	2.55243	2.0388	2.48201	1.44154	1.04197	1.09734	0	0	0	0	0	0	0	0	0	0	0
B0244.4a.1	WBGene00015079	B0244.4	10	11	15	10	15	12	9	10	11	19	11	6	0	0	0	0	0	0	5	0	7	0	0	0	0.175615	0.186253	0.271701	0.161051	0.263741	0.19651	0.136737	0.177287	0.23741	0.311243	0.176333	0.094058	0	0	0	0	0	0	0.807467	0	1.5883	0	0
B0244.4b.1	WBGene00015079	B0244.4	10	11	15	10	15	12	9	10	12	19	11	6	1	5	0	0	0	0	0	0	7	0	0	0	0.175615	0.186253	0.271701	0.161051	0.263741	0.19651	0.136737	0.177287	0.258992	0.311243	0.176333	0.094058	0.13993	0.452764	0	0	0	0	0	0	1.5883	0	0
B0244.4c.1	WBGene00015079	B0244.4	8	7	15	8	14	10	8	9	10	17	11	5	1	5	0	0	0	0	0	0	7	0	0	0	0.140492	0.118525	0.271701	0.128841	0.246158	0.163758	0.121544	0.159558	0.215827	0.27848	0.176333	0.0783816	0.13993	0.452764	0	0	0	0	0	0	1.5883	0	0
B0244.5.1	WBGene00015080	B0244.5	45	42	29	38	21	25	49	31	22	61	54	62	0	0	7	0	0	0	0	0	0	0	0	0	0.790267	0.711148	0.525289	0.611994	0.369238	0.409396	0.744459	0.549589	0.474819	0.999253	0.865634	0.971932	0	0	1.51931	0	0	0	0	0	0	0	0
B0244.6.1	WBGene00015081	B0244.6	155	136	133	133	109	109	125	132	96	127	126	123	4	0	0	0	9	0	4	0	2	4	0	2	2.72203	2.30276	2.40909	2.14198	1.91652	1.78497	1.89913	2.34018	2.07194	2.08041	2.01981	1.92819	0.55972	0	0	0	3.01368	0	0.645974	0	0.453801	0.93109	0
B0244.7.1	WBGene00015082	B0244.7	90	104	64	48	38	44	122	67	82	68	60	36	0	0	0	0	0	0	0	0	0	0	0	0	1.58053	1.76094	1.15926	0.773045	0.668144	0.720537	1.85355	1.18782	1.76978	1.11392	0.961815	0.564348	0	0	0	0	0	0	0	0	0	0	0
B0244.9.1	WBGene00015084	B0244.9	0	0	0	0	1	0	0	3	0	1	1	1	0	0	0	0	0	0	0	0	0	0	0	0	0	0	0	0	0.0175827	0	0	0.053186	0	0.0163812	0.0160303	0.0156763	0	0	0	0	0	0	0	0	0	0	0
B0250.18a.1	WBGene00206505	B0250.18	2	1	3	1	0	0	0	2	0	0	0	2	0	0	0	0	0	0	0	0	0	0	0	0	0.035123	0.0169321	0.0543403	0.0161051	0	0	0	0.0354573	0	0	0	0.0313527	0	0	0	0	0	0	0	0	0	0	0
B0250.18b.1	WBGene00206505	B0250.18	2	0	2	0	0	0	0	1	0	0	0	2	0	0	0	0	0	0	0	0	0	0	0	0	0.035123	0	0.0362269	0	0	0	0	0.0177287	0	0	0	0.0313527	0	0	0	0	0	0	0	0	0	0	0
B0250.5.1	WBGene00007122	B0250.5	1139	1462	1359	1705	1596	1951	1980	2086	1597	1659	1781	1880	243	605	142	269	120	139	298	127	200	177	74	109	20.0025	24.7547	24.6161	27.4592	28.0621	31.9493	30.0822	36.982	34.4676	27.1764	28.5499	29.4715	34.003	54.7845	30.8202	73.6616	40.1824	37.9732	48.125	37.0114	45.3801	41.2008	30.2675
B0250.7b.1	WBGene00007124	B0250.7	12	12	8	12	16	13	19	7	8	13	24	17	0	0	0	0	0	0	0	0	0	0	0	0	0.210738	0.203185	0.144907	0.193261	0.281324	0.212886	0.288668	0.124101	0.172661	0.212955	0.384726	0.266498	0	0	0	0	0	0	0	0	0	0	0
B0250.8.1	WBGene00007125	B0250.8	0	0	0	0	0	0	0	0	0	1	0	0	0	0	0	0	0	0	0	0	0	0	0	0	0	0	0	0	0	0	0	0	0	0.0163812	0	0	0	0	0	0	0	0	0	0	0	0	0
B0252.1.1	WBGene00015087	B0252.1	213	202	156	137	116	171	163	156	87	138	138	157	8	19	4	0	11	0	23	0	3	0	3	0	3.7406	3.42028	2.82569	2.2064	2.0396	2.80027	2.47647	2.76567	1.87769	2.2606	2.21217	2.46118	1.11944	1.7205	0.868176	0	3.68339	0	3.71435	0	0.680702	0	1.22706
B0252.3a.1	WBGene00015088	B0252.3	779	913	589	580	586	629	540	423	370	611	599	522	79	102	30	25	10	0	10	11	31	12	17	22	13.6804	15.459	10.6688	9.34097	10.3035	10.3004	8.20424	7.49923	7.98559	10.0089	9.60212	8.18304	11.0545	9.23639	6.51132	6.84588	3.34854	0	1.61493	3.20571	7.03392	2.79327	6.95334
B0252.3b.1	WBGene00015088	B0252.3	1055	1205	777	804	753	839	712	559	526	828	849	739	90	133	39	25	12	9	29	15	54	26	23	25	18.5274	20.4032	14.0741	12.9485	13.2398	13.7393	10.8174	9.91033	11.3525	13.5636	13.6097	11.5848	12.5937	12.0435	8.46472	6.84588	4.01824	2.45869	4.68331	4.37143	12.2526	6.05209	9.40746
B0252.3c.1	WBGene00015088	B0252.3	1049	1199	776	801	750	835	712	559	524	828	845	737	90	133	39	25	12	9	29	15	54	26	23	25	18.422	20.3016	14.056	12.9002	13.1871	13.6738	10.8174	9.91033	11.3093	13.5636	13.5456	11.5535	12.5937	12.0435	8.46472	6.84588	4.01824	2.45869	4.68331	4.37143	12.2526	6.05209	9.40746
B0252.3c.2	WBGene00015088	B0252.3	1049	1199	776	801	750	835	712	559	524	828	845	737	90	133	39	25	12	9	29	15	54	26	23	25	18.422	20.3016	14.056	12.9002	13.1871	13.6738	10.8174	9.91033	11.3093	13.5636	13.5456	11.5535	12.5937	12.0435	8.46472	6.84588	4.01824	2.45869	4.68331	4.37143	12.2526	6.05209	9.40746
B0252.5.1	WBGene00015089	B0252.5	18	9	20	6	10	6	42	39	27	10	11	12	0	0	0	0	0	11	0	0	10	0	0	0	0.316107	0.152389	0.362269	0.0966307	0.175827	0.098255	0.638108	0.691418	0.582733	0.163812	0.176333	0.188116	0	0	0	0	0	3.00507	0	0	2.26901	0	0
B0252.8.1	WBGene00044615	B0252.8	43	40	38	49	46	59	55	58	53	82	76	65	23	20	22	0	4	25	6	0	18	19	13	6	0.755144	0.677284	0.68831	0.789151	0.808806	0.966174	0.835618	1.02826	1.14388	1.34326	1.2183	1.01896	3.21839	1.81106	4.77497	0	1.33941	6.82971	0.96896	0	4.08421	4.42268	5.31726
B0261.1.1	WBGene00015091	B0261.1	813	769	836	558	595	616	669	579	442	621	570	616	55	75	34	23	21	76	48	0	15	8	17	10	14.2775	13.0208	15.1428	8.98665	10.4617	10.0875	10.1641	10.2649	9.53955	10.1727	9.13724	9.65662	7.69614	6.79146	7.3795	6.29821	7.03193	20.7623	7.75168	0	3.40351	1.86218	6.95334
B0261.5.1	WBGene00015093	B0261.5	13	10	14	10	8	11	8	7	5	14	4	2	1	0	0	0	0	0	0	0	0	0	3	0	0.228299	0.169321	0.253588	0.161051	0.140662	0.180134	0.121544	0.124101	0.107913	0.229337	0.064121	0.0313527	0.13993	0	0	0	0	0	0	0	0	0	1.22706
B0261.6a.1	WBGene00015094	B0261.6	3	2	0	2	0	0	2	0	1	2	1	3	0	0	0	0	0	0	0	0	0	0	0	0	0.0526845	0.0338642	0	0.0322102	0	0	0.0303861	0	0.0215827	0.0327624	0.0160303	0.047029	0	0	0	0	0	0	0	0	0	0	0
B0261.6b.1	WBGene00015094	B0261.6	3	2	0	2	0	0	2	0	0	2	1	2	0	0	0	0	0	0	0	0	0	0	0	0	0.0526845	0.0338642	0	0.0322102	0	0	0.0303861	0	0	0.0327624	0.0160303	0.0313527	0	0	0	0	0	0	0	0	0	0	0
B0261.7.1	WBGene00015095	B0261.7	161	122	118	226	228	193	386	428	314	192	220	207	35	20	6	0	6	11	91	12	20	5	9	19	2.8274	2.06572	2.13738	3.63976	4.00887	3.16054	5.86452	7.58787	6.77696	3.14519	3.52666	3.245	4.89755	1.81106	1.30226	0	2.00912	3.00507	14.6959	3.49714	4.53801	1.16386	3.68118
B0261.8.1	WBGene00015096	B0261.8	198	242	198	287	223	262	268	243	217	241	272	280	23	24	7	4	1	0	40	19	36	16	22	7	3.47718	4.09757	3.58646	4.62217	3.92095	4.29047	4.07174	4.30807	4.68344	3.94787	4.36023	4.38937	3.21839	2.17327	1.51931	1.09534	0.334854	0	6.45974	5.53714	8.16843	3.72436	8.99844
B0261.9.1	WBGene00195057	B0261.9	0	0	0	0	0	0	0	0	0	0	1	1	0	0	0	0	0	0	0	0	0	0	0	0	0	0	0	0	0	0	0	0	0	0	0.0160303	0.0156763	0	0	0	0	0	0	0	0	0	0	0
B0272.3.1	WBGene00007129	B0272.3	1038	1263	1188	1456	1298	1380	1569	1639	1124	1148	1316	1323	284	593	261	229	148	282	498	308	287	215	103	195	18.2288	21.3852	21.5188	23.449	22.8224	22.5987	23.8379	29.0573	24.2589	18.8056	21.0958	20.7398	39.7401	53.6978	56.6485	62.7082	49.5583	77.0391	80.4237	89.7599	65.1205	50.0461	42.1291
B0272.4.1	WBGene00007130	B0272.4	599	722	586	515	444	550	351	444	265	561	490	620	87	119	50	34	28	19	23	40	41	36	15	34	10.5193	12.225	10.6145	8.29413	7.80674	9.00671	5.33276	7.87153	5.71941	9.18985	7.85482	9.71932	12.1739	10.7758	10.8522	9.31039	9.3759	5.19058	3.71435	11.6571	9.30293	8.37981	6.1353
B0273.1a.1	WBGene00015097	B0273.1	4	16	11	22	19	23	30	30	24	13	21	13	2	1	0	0	0	9	0	0	0	0	0	0	0.070246	0.270913	0.199248	0.354312	0.334072	0.376644	0.455791	0.53186	0.517984	0.212955	0.336635	0.203792	0.27986	0.0905528	0	0	0	2.45869	0	0	0	0	0
B0273.1b.1	WBGene00015097	B0273.1	4	16	11	22	19	23	30	30	24	12	21	13	2	1	0	0	0	9	0	0	0	0	0	0	0.070246	0.270913	0.199248	0.354312	0.334072	0.376644	0.455791	0.53186	0.517984	0.196574	0.336635	0.203792	0.27986	0.0905528	0	0	0	2.45869	0	0	0	0	0
B0273.115.1	WBGene00206473	B0273.115	0	0	0	0	0	0	0	0	1	0	2	1	0	0	0	0	0	0	0	0	0	0	0	0	0	0	0	0	0	0	0	0	0.0215827	0	0.0320605	0.0156763	0	0	0	0	0	0	0	0	0	0	0
B0280.11.1	WBGene00015106	B0280.11	0	0	0	0	2	1	1	0	2	0	1	1	0	0	0	0	0	0	0	0	0	0	0	0	0	0	0	0	0.0351655	0.0163758	0.015193	0	0.0431654	0	0.0160303	0.0156763	0	0	0	0	0	0	0	0	0	0	0
B0280.17.1	WBGene00044674	B0280.17	1	0	1	0	0	0	0	0	3	2	0	0	0	0	0	0	0	0	0	0	0	0	0	0	0.0175615	0	0.0181134	0	0	0	0	0	0.0647481	0.0327624	0	0	0	0	0	0	0	0	0	0	0	0	0
B0280.2.1	WBGene00015100	B0280.2	62	51	58	26	40	28	32	25	28	70	48	46	1	0	0	0	0	0	0	0	0	0	0	0	1.08881	0.863537	1.05058	0.418733	0.70331	0.458523	0.486177	0.443217	0.604315	1.14668	0.769452	0.721111	0.13993	0	0	0	0	0	0	0	0	0	0
B0280.7.1	WBGene00015103	B0280.7	10	4	12	5	1	1	5	1	1	3	5	6	0	0	0	0	0	0	0	0	0	0	0	0	0.175615	0.0677284	0.217361	0.0805256	0.0175827	0.0163758	0.0759652	0.0177287	0.0215827	0.0491436	0.0801513	0.094058	0	0	0	0	0	0	0	0	0	0	0
B0280.9.1	WBGene00015104	B0280.9	137	156	124	603	588	624	697	719	504	705	714	730	15	23	6	16	26	11	66	96	53	36	28	24	2.40592	2.64141	2.24606	9.71138	10.3387	10.2185	10.5896	12.7469	10.8777	11.5487	11.4456	11.4437	2.09895	2.08272	1.30226	4.38136	8.7062	3.00507	10.6586	27.9771	12.0257	8.37981	11.4526
B0281.1.1	WBGene00015108	B0281.1	15	12	13	16	15	29	23	12	16	11	26	14	0	0	0	0	0	0	0	0	0	0	0	0	0.263422	0.203185	0.235475	0.257682	0.263741	0.474899	0.34944	0.212744	0.345323	0.180193	0.416787	0.219469	0	0	0	0	0	0	0	0	0	0	0
B0281.3.1	WBGene00015110	B0281.3	522	400	670	409	445	465	440	466	299	482	494	444	89	50	39	0	18	15	41	25	54	29	11	14	9.1671	6.77284	12.136	6.58699	7.82432	7.61476	6.68494	8.26156	6.45322	7.89573	7.91894	6.96029	12.4538	4.52764	8.46472	0	6.02737	4.09782	6.62123	7.28571	12.2526	6.75041	4.49922
B0281.4.1	WBGene00015111	B0281.4	8	0	0	0	0	0	0	0	0	0	0	0	0	0	0	0	0	0	0	0	0	0	0	0	0.140492	0	0	0	0	0	0	0	0	0	0	0	0	0	0	0	0	0	0	0	0	0	0
B0281.5a.1	WBGene00015112	B0281.5	6	0	0	0	0	1	2	0	0	0	0	0	1	0	0	0	0	0	0	0	0	0	0	0	0.105369	0	0	0	0	0.0163758	0.0303861	0	0	0	0	0	0.13993	0	0	0	0	0	0	0	0	0	0
B0281.5b.1	WBGene00015112	B0281.5	6	0	0	0	0	1	2	0	0	0	0	0	1	0	0	0	0	0	0	0	0	0	0	0	0.105369	0	0	0	0	0.0163758	0.0303861	0	0	0	0	0	0.13993	0	0	0	0	0	0	0	0	0	0
B0281.6.1	WBGene00015113	B0281.6	15	11	16	10	12	9	7	14	8	12	11	15	1	0	0	0	0	0	0	0	0	0	0	0	0.263422	0.186253	0.289815	0.161051	0.210993	0.147383	0.106351	0.248201	0.172661	0.196574	0.176333	0.235145	0.13993	0	0	0	0	0	0	0	0	0	0
B0281.8.1	WBGene00015114	B0281.8	0	1	1	0	1	0	0	0	0	0	0	3	0	0	0	0	0	0	0	0	0	0	0	0	0	0.0169321	0.0181134	0	0.0175827	0	0	0	0	0	0	0.047029	0	0	0	0	0	0	0	0	0	0	0
B0284.3.1	WBGene00007133	B0284.3	23	35	32	14	10	19	9	23	9	21	19	18	0	0	0	0	0	0	0	0	0	0	0	0	0.403914	0.592623	0.57963	0.225472	0.175827	0.311141	0.136737	0.407759	0.194244	0.344005	0.304575	0.282174	0	0	0	0	0	0	0	0	0	0	0
B0285.3.1	WBGene00007136	B0285.3	18	30	22	12	18	20	21	15	12	13	29	18	30	43	22	13	24	5	33	0	13	12	6	4	0.316107	0.507963	0.398495	0.193261	0.316489	0.327517	0.319054	0.26593	0.258992	0.212955	0.464877	0.282174	4.1979	3.89377	4.77497	3.55986	8.03649	1.36594	5.32928	0	2.94971	2.79327	2.45412
B0285.6.1	WBGene00007138	B0285.6	52	57	50	50	49	39	56	48	58	86	84	49	4	8	12	0	2	7	8	0	0	4	8	0	0.913198	0.965129	0.905671	0.805256	0.861555	0.638658	0.850811	0.850976	1.2518	1.40878	1.34654	0.76814	0.55972	0.724423	2.60453	0	0.669707	1.91232	1.29195	0	0	0.93109	3.27216
B0286.1.1	WBGene00015115	B0286.1	98	117	91	73	81	87	110	88	64	106	112	86	8	2	4	0	6	0	0	0	6	0	0	0	1.72103	1.98105	1.64832	1.17567	1.4242	1.4247	1.67124	1.56012	1.38129	1.73641	1.79539	1.34816	1.11944	0.181106	0.868176	0	2.00912	0	0	0	1.3614	0	0
B0286.1.2	WBGene00015115	B0286.1	98	117	91	73	81	87	110	88	64	106	112	86	8	2	4	0	6	0	0	0	6	0	0	0	1.72103	1.98105	1.64832	1.17567	1.4242	1.4247	1.67124	1.56012	1.38129	1.73641	1.79539	1.34816	1.11944	0.181106	0.868176	0	2.00912	0	0	0	1.3614	0	0
B0286.1.3	WBGene00015115	B0286.1	98	117	91	73	81	87	110	88	64	106	112	86	8	2	4	0	6	0	0	0	6	0	0	0	1.72103	1.98105	1.64832	1.17567	1.4242	1.4247	1.67124	1.56012	1.38129	1.73641	1.79539	1.34816	1.11944	0.181106	0.868176	0	2.00912	0	0	0	1.3614	0	0
B0294.1.1	WBGene00015117	B0294.1	7	7	11	9	8	5	8	6	13	10	15	6	1	0	0	0	0	0	0	0	0	7	0	3	0.12293	0.118525	0.199248	0.144946	0.140662	0.0818792	0.121544	0.106372	0.280575	0.163812	0.240454	0.094058	0.13993	0	0	0	0	0	0	0	0	1.62941	0
B0294.3.1	WBGene00015118	B0294.3	0	0	0	0	1	0	0	0	0	0	0	0	0	0	0	0	0	0	0	0	0	0	0	0	0	0	0	0	0.0175827	0	0	0	0	0	0	0	0	0	0	0	0	0	0	0	0	0	0
B0302.2.1	WBGene00015119	B0302.2	0	0	0	1	0	1	0	0	0	0	0	3	0	0	0	0	0	0	0	0	0	0	0	0	0	0	0	0.0161051	0	0.0163758	0	0	0	0	0	0.047029	0	0	0	0	0	0	0	0	0	0	0
B0302.4.1	WBGene00015121	B0302.4	0	0	0	0	0	0	0	2	1	0	0	2	0	0	0	0	0	0	0	0	0	0	0	0	0	0	0	0	0	0	0	0.0354573	0.0215827	0	0	0.0313527	0	0	0	0	0	0	0	0	0	0	0
B0302.5.1	WBGene00015122	B0302.5	654	630	988	557	496	595	534	698	378	500	592	658	121	200	106	61	22	21	67	22	65	65	35	35	11.4852	10.6672	17.8961	8.97055	8.72104	9.74362	8.11309	12.3746	8.15826	8.1906	9.48991	10.315	16.9315	18.1106	23.0067	16.7039	7.36678	5.73695	10.8201	6.41142	14.7485	15.1302	14.3157
B0303.11a.1	WBGene00015131	B0303.11	1478	1638	1382	1352	1242	1419	1708	1408	1197	1390	1477	1395	167	264	179	61	103	122	160	97	122	92	45	105	25.9559	27.7348	25.0328	21.7741	21.8378	23.2373	25.9497	24.962	25.8345	22.7699	23.6767	21.8685	23.3683	23.9059	38.8509	16.7039	34.4899	33.329	25.8389	28.2686	27.6819	21.4151	18.4059
B0303.11a.2	WBGene00015131	B0303.11	1478	1638	1382	1352	1242	1419	1708	1408	1197	1390	1477	1395	167	264	179	61	103	122	160	97	122	92	45	105	25.9559	27.7348	25.0328	21.7741	21.8378	23.2373	25.9497	24.962	25.8345	22.7699	23.6767	21.8685	23.3683	23.9059	38.8509	16.7039	34.4899	33.329	25.8389	28.2686	27.6819	21.4151	18.4059
B0303.11b.1	WBGene00015131	B0303.11	1497	1655	1398	1364	1258	1448	1727	1429	1204	1401	1497	1410	204	286	185	71	105	131	169	113	126	99	51	108	26.2896	28.0226	25.3226	21.9674	22.1191	23.7122	26.2384	25.3343	25.9856	22.95	23.9973	22.1036	28.5457	25.8981	40.1531	19.4423	35.1596	35.7877	27.2924	32.9314	28.5895	23.0445	20.86
B0303.11b.2	WBGene00015131	B0303.11	1497	1655	1398	1364	1258	1448	1727	1429	1204	1401	1497	1410	204	286	185	71	105	131	169	113	126	99	51	108	26.2896	28.0226	25.3226	21.9674	22.1191	23.7122	26.2384	25.3343	25.9856	22.95	23.9973	22.1036	28.5457	25.8981	40.1531	19.4423	35.1596	35.7877	27.2924	32.9314	28.5895	23.0445	20.86
B0303.14.1	WBGene00015132	B0303.14	99	94	67	106	71	101	102	117	73	74	109	97	17	15	5	11	4	4	17	29	16	3	6	8	1.73859	1.59162	1.2136	1.70714	1.24838	1.65396	1.54969	2.07425	1.57554	1.21221	1.7473	1.5206	2.37881	1.35829	1.08522	3.01219	1.33941	1.09275	2.74539	8.45142	3.63041	0.698318	2.45412
B0303.16.1	WBGene00044678	B0303.16	1	1	2	1	0	0	1	5	1	1	0	4	0	0	0	0	0	0	0	0	0	0	0	0	0.0175615	0.0169321	0.0362269	0.0161051	0	0	0.015193	0.0886433	0.0215827	0.0163812	0	0.0627053	0	0	0	0	0	0	0	0	0	0	0
B0303.3.1	WBGene00015125	B0303.3	2134	2720	2507	2868	2534	2990	3878	4026	3065	3013	3017	3296	593	1000	482	485	225	344	865	430	619	425	173	326	37.4762	46.0553	45.4104	46.1895	44.5547	48.9637	58.9186	71.3756	66.1509	49.3565	48.3633	51.6692	82.9784	90.5528	104.615	132.81	75.3421	93.9767	139.692	125.314	140.452	98.9284	70.7605
B0303.3.2	WBGene00015125	B0303.3	2134	2720	2507	2868	2534	2990	3878	4026	3065	3013	3017	3296	593	1000	482	485	225	344	865	430	619	425	173	326	37.4762	46.0553	45.4104	46.1895	44.5547	48.9637	58.9186	71.3756	66.1509	49.3565	48.3633	51.6692	82.9784	90.5528	104.615	132.81	75.3421	93.9767	139.692	125.314	140.452	98.9284	70.7605
B0303.4.1	WBGene00015126	B0303.4	1076	1089	996	930	956	1011	1014	895	656	821	900	831	124	222	54	65	30	88	55	99	73	81	28	60	18.8962	18.439	18.041	14.9778	16.8091	16.556	15.4057	15.8672	14.1582	13.449	14.4272	13.027	17.3513	20.1027	11.7204	17.7993	10.0456	24.0406	8.88214	28.8514	16.5638	18.8546	11.4526
B0303.4.2	WBGene00015126	B0303.4	1076	1089	996	930	956	1011	1014	895	656	821	900	831	124	222	54	65	30	88	55	99	73	81	28	60	18.8962	18.439	18.041	14.9778	16.8091	16.556	15.4057	15.8672	14.1582	13.449	14.4272	13.027	17.3513	20.1027	11.7204	17.7993	10.0456	24.0406	8.88214	28.8514	16.5638	18.8546	11.4526
B0303.7a.1	WBGene00015128	B0303.7	493	579	586	537	516	634	614	638	480	568	630	608	57	100	70	15	24	34	125	54	46	47	32	23	8.65782	9.80368	10.6145	8.64845	9.0727	10.3823	9.32853	11.3109	10.3597	9.30452	10.0991	9.53121	7.976	9.05528	15.1931	4.10753	8.03649	9.2884	20.1867	15.7371	10.4374	10.9403	13.0886
B0303.7b.1	WBGene00015128	B0303.7	493	580	585	537	516	634	613	638	480	568	630	607	57	100	70	15	24	34	125	54	46	47	32	23	8.65782	9.82061	10.5964	8.64845	9.0727	10.3823	9.31334	11.3109	10.3597	9.30452	10.0991	9.51553	7.976	9.05528	15.1931	4.10753	8.03649	9.2884	20.1867	15.7371	10.4374	10.9403	13.0886
B0304.2.1	WBGene00015134	B0304.2	9	0	1	0	0	0	0	0	0	1	0	0	0	0	0	0	0	0	0	0	0	0	0	0	0.158053	0	0.0181134	0	0	0	0	0	0	0.0163812	0	0	0	0	0	0	0	0	0	0	0	0	0
B0304.4.1	WBGene00015136	B0304.4	9	0	0	0	0	0	0	0	0	0	2	0	0	0	0	0	0	0	0	0	0	0	0	0	0.158053	0	0	0	0	0	0	0	0	0	0.0320605	0	0	0	0	0	0	0	0	0	0	0	0
B0310.1a.1	WBGene00015137	B0310.1	138	200	155	182	165	163	214	182	188	240	241	202	4	30	2	30	15	12	24	0	5	8	14	4	2.42349	3.38642	2.80758	2.93113	2.90115	2.66926	3.25131	3.22662	4.05755	3.93149	3.86329	3.16662	0.55972	2.71658	0.434088	8.21505	5.02281	3.27826	3.87584	0	1.1345	1.86218	5.72628
B0310.1b.1	WBGene00015137	B0310.1	149	210	163	196	172	177	229	198	199	260	256	219	4	30	6	30	15	12	24	12	5	11	14	14	2.61666	3.55574	2.95249	3.1566	3.02423	2.89852	3.47921	3.51028	4.29495	4.25911	4.10374	3.43312	0.55972	2.71658	1.30226	8.21505	5.02281	3.27826	3.87584	3.49714	1.1345	2.5605	5.72628
B0310.2a.1	WBGene00015138	B0310.2	127	168	139	96	101	103	113	93	115	124	120	102	12	20	14	0	13	9	6	22	7	0	7	7	2.23031	2.84459	2.51777	1.54609	1.77586	1.68671	1.71681	1.64877	2.48201	2.03127	1.92363	1.59899	1.67916	1.81106	3.03862	0	4.3531	2.45869	0.96896	6.41142	1.5883	0	2.86314
B0310.2b.1	WBGene00015138	B0310.2	118	164	133	93	99	101	111	86	111	120	118	95	7	16	11	0	13	9	0	22	4	0	7	2	2.07226	2.77686	2.40909	1.49778	1.74069	1.65396	1.68643	1.52467	2.39568	1.96574	1.89157	1.48925	0.979509	1.44885	2.38748	0	4.3531	2.45869	0	6.41142	0.907603	0	2.86314
B0310.3.1	WBGene00015139	B0310.3	51	67	94	48	56	75	46	63	50	67	89	111	3	9	4	0	4	0	0	22	8	5	0	0	0.895636	1.13445	1.70266	0.773045	0.984634	1.22819	0.69888	1.11691	1.07913	1.09754	1.42669	1.74007	0.41979	0.814975	0.868176	0	1.33941	0	0	6.41142	1.81521	1.16386	0
B0310.3.2	WBGene00015139	B0310.3	51	67	94	48	56	75	46	63	50	67	89	111	3	9	4	0	4	0	0	22	8	5	0	0	0.895636	1.13445	1.70266	0.773045	0.984634	1.22819	0.69888	1.11691	1.07913	1.09754	1.42669	1.74007	0.41979	0.814975	0.868176	0	1.33941	0	0	6.41142	1.81521	1.16386	0
B0310.6.1	WBGene00015142	B0310.6	1	5	2	3	1	1	4	4	2	4	8	5	1	1	0	0	0	0	10	0	0	0	0	0	0.0175615	0.0846605	0.0362269	0.0483153	0.0175827	0.0163758	0.0607722	0.0709147	0.0431654	0.0655248	0.128242	0.0783816	0.13993	0.0905528	0	0	0	0	1.61493	0	0	0	0
B0334.10.1	WBGene00007148	B0334.10	0	0	0	0	0	0	0	0	0	0	0	0	0	0	0	0	0	0	0	0	0	0	0	0	0	0	0	0	0	0	0	0	0	0	0	0	0	0	0	0	0	0	0	0	0	0	0
B0334.13.1	WBGene00007149	B0334.13	3	0	2	2	3	4	7	4	7	5	11	4	1	0	0	0	0	0	0	0	0	0	0	0	0.0526845	0	0.0362269	0.0322102	0.0527482	0.0655033	0.106351	0.0709147	0.151079	0.081906	0.176333	0.0627053	0.13993	0	0	0	0	0	0	0	0	0	0
B0334.20.1	WBGene00219293	B0334.20	0	0	0	0	0	0	2	0	1	0	2	0	0	0	0	0	0	0	0	0	0	0	0	0	0	0	0	0	0	0	0.0303861	0	0.0215827	0	0.0320605	0	0	0	0	0	0	0	0	0	0	0	0
B0334.3a.1	WBGene00007143	B0334.3	5782	5962	6591	5839	4708	6133	6035	6380	4200	5336	5299	6620	1405	2391	959	511	516	807	1102	578	763	943	383	586	101.541	100.949	119.386	94.0378	82.7796	100.433	91.69	113.109	90.6473	87.41	84.9443	103.777	196.601	216.512	208.145	139.93	172.784	220.463	177.966	168.446	173.125	219.505	156.655
B0334.3a.2	WBGene00007143	B0334.3	5782	5962	6591	5839	4708	6133	6035	6380	4200	5336	5299	6620	1405	2391	959	511	516	807	1102	578	767	943	383	586	101.541	100.949	119.386	94.0378	82.7796	100.433	91.69	113.109	90.6473	87.41	84.9443	103.777	196.601	216.512	208.145	139.93	172.784	220.463	177.966	168.446	174.033	219.505	156.655
B0334.3b.1	WBGene00007143	B0334.3	5639	5784	6399	5663	4572	5967	5830	6162	4064	5173	5132	6421	1386	2363	911	493	512	807	1082	542	731	935	382	579	99.0292	97.9352	115.908	91.2033	80.3883	97.7146	88.5755	109.244	87.712	84.7399	82.2673	100.658	193.943	213.976	197.727	135.001	171.445	220.463	174.736	157.954	165.864	217.642	156.246
B0334.4.1	WBGene00007144	B0334.4	150	189	195	218	179	225	197	242	204	206	232	216	35	62	25	19	15	7	27	40	27	23	19	22	2.63422	3.20017	3.53212	3.51091	3.14731	3.68456	2.99303	4.29034	4.40287	3.37453	3.71902	3.38609	4.89755	5.61428	5.4261	5.20287	5.02281	1.91232	4.36032	11.6571	6.12632	5.35377	7.77138
B0334.5.1	WBGene00007145	B0334.5	865	819	684	938	818	789	847	620	538	734	764	657	52	46	26	13	29	35	44	12	22	6	12	2	15.1907	13.8674	12.3896	15.1066	14.3827	12.9205	12.8685	10.9918	11.6115	12.0238	12.2471	10.2993	7.27635	4.16543	5.64314	3.55986	9.71076	9.56159	7.10571	3.49714	4.99182	1.39664	4.90824
B0334.6.1	WBGene00007146	B0334.6	6	5	11	9	18	10	12	9	8	9	13	9	0	0	0	0	0	0	0	0	0	0	0	0	0.105369	0.0846605	0.199248	0.144946	0.316489	0.163758	0.182317	0.159558	0.172661	0.147431	0.208393	0.141087	0	0	0	0	0	0	0	0	0	0	0
B0336.12.1	WBGene00015149	B0336.12	0	2	1	2	0	0	0	0	2	0	0	1	0	0	0	0	0	0	0	0	0	0	0	0	0	0.0338642	0.0181134	0.0322102	0	0	0	0	0.0431654	0	0	0.0156763	0	0	0	0	0	0	0	0	0	0	0
B0336.13.1	WBGene00015150	B0336.13	21	15	23	11	23	7	29	34	28	24	44	25	12	4	13	13	0	17	0	0	0	0	2	1	0.368791	0.253981	0.416609	0.177156	0.404403	0.114631	0.440598	0.602775	0.604315	0.393149	0.705331	0.391908	1.67916	0.362211	2.82157	3.55986	0	4.6442	0	0	0	0	0.81804
B0336.7a.1	WBGene00015147	B0336.7	152	151	149	127	150	161	268	249	189	182	153	185	7	3	2	11	4	12	9	35	0	1	5	7	2.66935	2.55675	2.6989	2.04535	2.63741	2.63651	4.07174	4.41444	4.07913	2.98138	2.45263	2.90012	0.979509	0.271658	0.434088	3.01219	1.33941	3.27826	1.45344	10.2	0	0.232773	2.0451
B0336.7b.1	WBGene00015147	B0336.7	127	128	134	114	134	138	253	222	173	162	130	161	7	0	2	11	0	0	9	35	0	1	4	5	2.23031	2.16731	2.4272	1.83598	2.35609	2.25987	3.84384	3.93576	3.7338	2.65375	2.08393	2.52389	0.979509	0	0.434088	3.01219	0	0	1.45344	10.2	0	0.232773	1.63608
B0348.1.1	WBGene00015151	B0348.1	0	0	0	0	0	0	0	0	0	0	1	0	0	0	0	0	0	0	0	0	0	0	0	0	0	0	0	0	0	0	0	0	0	0	0.0160303	0	0	0	0	0	0	0	0	0	0	0	0
B0348.10.1	WBGene00255704	B0348.10	8	10	9	3	4	7	2	4	2	7	4	7	1	0	0	0	0	0	0	0	0	0	0	6	0.140492	0.169321	0.163021	0.0483153	0.070331	0.114631	0.0303861	0.0709147	0.0431654	0.114668	0.064121	0.109734	0.13993	0	0	0	0	0	0	0	0	0	0
B0348.2a.1	WBGene00015152	B0348.2	4	8	22	9	8	19	2	3	3	9	38	31	4	0	0	0	0	14	0	0	0	0	0	0	0.070246	0.135457	0.398495	0.144946	0.140662	0.311141	0.0303861	0.053186	0.0647481	0.147431	0.60915	0.485966	0.55972	0	0	0	0	3.82464	0	0	0	0	0
B0348.2b.1	WBGene00015152	B0348.2	2	5	19	8	7	12	2	2	2	8	26	27	0	0	0	0	0	0	0	0	0	0	0	0	0.035123	0.0846605	0.344155	0.128841	0.123079	0.19651	0.0303861	0.0354573	0.0431654	0.13105	0.416787	0.423261	0	0	0	0	0	0	0	0	0	0	0
B0348.5a.1	WBGene00015153	B0348.5	1	0	3	0	0	1	1	0	0	1	1	0	0	0	0	0	0	0	0	0	0	0	0	0	0.0175615	0	0.0543403	0	0	0.0163758	0.015193	0	0	0.0163812	0.0160303	0	0	0	0	0	0	0	0	0	0	0	0
B0348.5b.1	WBGene00015153	B0348.5	1	0	3	0	0	1	0	0	0	1	1	0	0	0	0	0	0	0	0	0	0	0	0	0	0.0175615	0	0.0543403	0	0	0.0163758	0	0	0	0.0163812	0.0160303	0	0	0	0	0	0	0	0	0	0	0	0
B0353.1a.1	WBGene00015155	B0353.1	311	257	285	252	208	256	297	238	203	227	285	251	58	69	35	16	25	11	37	37	37	20	6	13	5.46162	4.35155	5.16233	4.05849	3.65721	4.19221	4.51233	4.21942	4.38129	3.71853	4.56862	3.93476	8.11593	6.24815	7.59654	4.38136	8.37134	3.00507	5.97526	10.7828	8.39533	4.65545	2.45412
B0353.1b.1	WBGene00015155	B0353.1	315	257	287	252	207	257	299	242	203	226	285	252	67	70	35	16	25	11	44	37	37	20	9	13	5.53187	4.35155	5.19855	4.05849	3.63963	4.20859	4.54272	4.29034	4.38129	3.70215	4.56862	3.95043	9.3753	6.3387	7.59654	4.38136	8.37134	3.00507	7.10571	10.7828	8.39533	4.65545	3.68118
B0353.1c.1	WBGene00015155	B0353.1	310	256	285	251	206	255	297	238	200	225	276	251	58	69	35	16	25	11	37	37	33	20	6	13	5.44406	4.33462	5.16233	4.04238	3.62205	4.17584	4.51233	4.21942	4.31654	3.68577	4.42435	3.93476	8.11593	6.24815	7.59654	4.38136	8.37134	3.00507	5.97526	10.7828	7.48772	4.65545	2.45412
B0353.1d.1	WBGene00015155	B0353.1	251	205	231	213	169	215	234	198	167	191	221	205	52	46	31	1	12	1	34	37	24	19	4	10	4.40793	3.47108	4.1842	3.43039	2.97148	3.5208	3.55517	3.51028	3.60431	3.12881	3.54269	3.21365	7.27635	4.16543	6.72836	0.273835	4.01824	0.273188	5.49078	10.7828	5.44562	4.42268	1.63608
B0353.1e.1	WBGene00015155	B0353.1	199	153	169	181	127	158	176	160	126	161	182	159	44	43	27	1	12	1	23	37	15	19	3	7	3.49474	2.59061	3.06117	2.91503	2.23301	2.58738	2.67398	2.83659	2.71942	2.63737	2.91751	2.49254	6.15692	3.89377	5.86019	0.273835	4.01824	0.273188	3.71435	10.7828	3.40351	4.42268	1.22706
B0353.1e.2	WBGene00015155	B0353.1	199	153	169	181	127	158	176	160	126	161	182	159	47	43	27	1	12	13	23	37	15	19	3	7	3.49474	2.59061	3.06117	2.91503	2.23301	2.58738	2.67398	2.83659	2.71942	2.63737	2.91751	2.49254	6.5767	3.89377	5.86019	0.273835	4.01824	3.55145	3.71435	10.7828	3.40351	4.42268	1.22706
B0361.11.1	WBGene00015165	B0361.11	0	4	1	0	3	0	0	1	1	0	3	1	0	0	0	0	0	0	0	0	0	0	0	0	0	0.0677284	0.0181134	0	0.0527482	0	0	0.0177287	0.0215827	0	0.0480908	0.0156763	0	0	0	0	0	0	0	0	0	0	0
B0361.14.1	WBGene00303033	B0361.14	66	75	71	29	30	32	42	32	44	39	47	40	0	0	0	0	0	0	0	0	0	0	0	0	1.15906	1.26991	1.28605	0.467048	0.527482	0.524027	0.638108	0.567317	0.949638	0.638866	0.753422	0.627053	0	0	0	0	0	0	0	0	0	0	0
B0361.2a.1	WBGene00015156	B0361.2	238	221	226	221	245	242	288	267	225	253	292	307	30	44	53	29	39	29	86	12	21	52	19	25	4.17963	3.74199	4.09363	3.55923	4.30777	3.96295	4.3756	4.73355	4.8561	4.14444	4.68083	4.81263	4.1979	3.98432	11.5033	7.94122	13.0593	7.92246	13.8884	3.49714	4.76491	12.1042	7.77138
B0361.2b.1	WBGene00015156	B0361.2	69	41	54	55	55	64	82	70	43	72	72	79	2	7	7	11	2	11	22	0	8	16	2	3	1.21174	0.694216	0.978125	0.885781	0.967051	1.04805	1.24583	1.24101	0.928056	1.17945	1.15418	1.23843	0.27986	0.63387	1.51931	3.01219	0.669707	3.00507	3.55286	0	1.81521	3.72436	0.81804
B0361.3.1	WBGene00015157	B0361.3	383	425	392	441	411	415	482	499	346	487	492	470	130	128	92	11	23	48	32	98	58	45	49	68	6.72605	7.19614	7.10046	7.10235	7.22651	6.79597	7.32305	8.84661	7.46761	7.97764	7.88688	7.36787	18.1909	11.5908	19.968	3.01219	7.70163	13.113	5.16779	28.56	13.1602	10.4748	20.042
B0361.3.2	WBGene00015157	B0361.3	383	425	392	441	411	415	482	499	346	487	492	470	130	128	92	11	23	48	32	98	58	45	49	68	6.72605	7.19614	7.10046	7.10235	7.22651	6.79597	7.32305	8.84661	7.46761	7.97764	7.88688	7.36787	18.1909	11.5908	19.968	3.01219	7.70163	13.113	5.16779	28.56	13.1602	10.4748	20.042
B0361.4.1	WBGene00015158	B0361.4	67	72	56	39	39	38	39	33	48	44	55	48	17	6	23	0	0	13	12	0	0	2	0	6	1.17662	1.21911	1.01435	0.628099	0.685727	0.622282	0.592529	0.585046	1.03597	0.720772	0.881664	0.752464	2.37881	0.543317	4.99201	0	0	3.55145	1.93792	0	0	0.465545	0
B0361.6.1	WBGene00015160	B0361.6	81	93	64	287	261	242	307	296	264	309	318	310	13	28	4	32	38	28	91	20	53	35	17	45	1.42248	1.57468	1.15926	4.62217	4.5891	3.96295	4.66427	5.24769	5.69783	5.06179	5.09762	4.85966	1.81909	2.53548	0.868176	8.76272	12.7244	7.64927	14.6959	5.82857	12.0257	8.14704	6.95334
B0361.9.1	WBGene00015163	B0361.9	397	429	403	266	313	308	359	257	259	337	340	289	104	164	137	43	48	69	87	95	48	67	33	53	6.97191	7.26387	7.29971	4.28396	5.5034	5.04376	5.4543	4.55627	5.58992	5.52046	5.45029	4.53046	14.5527	14.8507	29.735	11.7749	16.073	18.85	14.0499	27.6857	10.8912	15.5958	13.4977
B0365.9.1	WBGene00219208	B0365.9	76	72	53	65	63	53	87	89	68	79	99	61	7	28	4	8	0	0	4	0	5	6	8	9	1.33467	1.21911	0.960012	1.04683	1.10771	0.867919	1.3218	1.57785	1.46762	1.29411	1.58699	0.956256	0.979509	2.53548	0.868176	2.19068	0	0	0.645974	0	1.1345	1.39664	3.27216
B0379.1a.1	WBGene00007155	B0379.1	690	1005	866	934	806	982	1182	875	983	1110	1406	1168	72	164	182	93	62	135	165	179	97	95	38	98	12.1174	17.0168	15.6862	15.0422	14.1717	16.0811	17.9582	15.5126	21.2158	18.1831	22.5385	18.3099	10.075	14.8507	39.502	25.4667	20.7609	36.8804	26.6464	52.1657	22.0094	22.1134	15.5428
B0379.2.1	WBGene00007156	B0379.2	1	0	1	0	0	0	1	0	1	0	0	0	0	0	0	0	0	0	0	0	0	0	0	0	0.0175615	0	0.0181134	0	0	0	0.015193	0	0.0215827	0	0	0	0	0	0	0	0	0	0	0	0	0	0
B0379.6.1	WBGene00007158	B0379.6	0	0	0	0	0	0	0	0	0	0	0	0	0	0	0	0	0	0	0	0	0	0	0	0	0	0	0	0	0	0	0	0	0	0	0	0	0	0	0	0	0	0	0	0	0	0	0
B0379.7.1	WBGene00007159	B0379.7	0	1	2	1	1	0	0	3	2	3	0	0	0	0	0	0	0	0	0	0	0	0	0	0	0	0.0169321	0.0362269	0.0161051	0.0175827	0	0	0.053186	0.0431654	0.0491436	0	0	0	0	0	0	0	0	0	0	0	0	0
B0379.7.2	WBGene00007159	B0379.7	0	1	2	1	1	0	0	3	2	3	0	0	0	0	0	0	0	0	0	0	0	0	0	0	0	0.0169321	0.0362269	0.0161051	0.0175827	0	0	0.053186	0.0431654	0.0491436	0	0	0	0	0	0	0	0	0	0	0	0	0
B0391.14.1	WBGene00206462	B0391.14	0	0	0	0	0	0	1	0	0	0	0	1	0	0	0	0	0	0	0	0	0	0	0	0	0	0	0	0	0	0	0.015193	0	0	0	0	0.0156763	0	0	0	0	0	0	0	0	0	0	0
B0393.3.1	WBGene00007168	B0393.3	144	27	15	39	42	39	65	53	46	32	38	46	7	11	1	15	2	0	0	7	2	0	0	2	2.52885	0.457167	0.271701	0.628099	0.738475	0.638658	0.987548	0.939619	0.992804	0.524198	0.60915	0.721111	0.979509	0.996081	0.217044	4.10753	0.669707	0	0	2.04	0.453801	0	0
B0393.4.1	WBGene00007169	B0393.4	0	0	2	1	0	1	1	0	0	0	0	1	0	0	0	0	0	0	0	0	0	0	0	0	0	0	0.0362269	0.0161051	0	0.0163758	0.015193	0	0	0	0	0.0156763	0	0	0	0	0	0	0	0	0	0	0
B0393.5.1	WBGene00007170	B0393.5	23	27	13	26	19	26	43	29	31	30	47	38	0	3	2	0	0	11	0	0	0	1	0	0	0.403914	0.457167	0.235475	0.418733	0.334072	0.425772	0.653301	0.514131	0.669063	0.491436	0.753422	0.5957	0	0.271658	0.434088	0	0	3.00507	0	0	0	0.232773	0
B0393.6.1	WBGene00007171	B0393.6	16	0	1	1	0	0	3	1	0	2	0	0	0	0	0	0	0	0	0	0	0	0	0	0	0.280984	0	0.0181134	0.0161051	0	0	0.0455791	0.0177287	0	0.0327624	0	0	0	0	0	0	0	0	0	0	0	0	0
B0393.7.1	WBGene00007172	B0393.7	20	16	11	32	26	25	20	18	12	11	10	22	0	1	3	0	2	0	0	0	0	3	0	0	0.35123	0.270913	0.199248	0.515364	0.457151	0.409396	0.303861	0.319116	0.258992	0.180193	0.160303	0.344879	0	0.0905528	0.651132	0	0.669707	0	0	0	0	0.698318	0
B0393.8.1	WBGene00007173	B0393.8	4	1	2	1	1	0	0	0	1	3	2	2	0	0	0	0	0	0	0	0	0	0	0	0	0.070246	0.0169321	0.0362269	0.0161051	0.0175827	0	0	0	0.0215827	0.0491436	0.0320605	0.0313527	0	0	0	0	0	0	0	0	0	0	0
B0393.9a.1	WBGene00044636	B0393.9	828	881	707	758	622	703	536	559	404	570	579	660	126	143	97	47	31	57	53	16	30	6	19	40	14.5409	14.9172	12.8062	12.2077	10.9365	11.5122	8.14347	9.91033	8.71941	9.33728	9.28152	10.3464	17.6312	12.9491	21.0533	12.8702	10.3805	15.5717	8.55915	4.66285	6.80702	1.39664	7.77138
B0393.9a.2	WBGene00044636	B0393.9	828	881	707	758	622	703	536	559	404	570	579	660	126	143	97	47	31	57	53	16	30	6	19	40	14.5409	14.9172	12.8062	12.2077	10.9365	11.5122	8.14347	9.91033	8.71941	9.33728	9.28152	10.3464	17.6312	12.9491	21.0533	12.8702	10.3805	15.5717	8.55915	4.66285	6.80702	1.39664	7.77138
B0393.9b.1	WBGene00044636	B0393.9	829	892	711	767	631	710	538	563	407	575	583	664	126	152	97	47	31	57	53	16	33	6	19	40	14.5585	15.1034	12.8786	12.3526	11.0947	11.6268	8.17386	9.98124	8.78415	9.41918	9.34564	10.4091	17.6312	13.764	21.0533	12.8702	10.3805	15.5717	8.55915	4.66285	7.48772	1.39664	7.77138
B0395.3.1	WBGene00007175	B0395.3	4766	5504	5611	4341	3905	4092	3609	3720	2654	4295	4350	4434	594	937	517	189	142	277	346	169	345	264	147	262	83.6981	93.1942	101.634	69.9123	68.6606	67.0099	54.8317	65.9506	57.2805	70.3572	69.7316	69.5088	83.1184	84.848	112.212	51.7548	47.5492	75.6731	55.8767	49.2514	78.2807	61.452	60.1259
B0395.3.2	WBGene00007175	B0395.3	4766	5504	5611	4341	3905	4092	3609	3720	2654	4295	4350	4434	594	938	517	189	142	277	346	169	345	264	147	262	83.6981	93.1942	101.634	69.9123	68.6606	67.0099	54.8317	65.9506	57.2805	70.3572	69.7316	69.5088	83.1184	84.9386	112.212	51.7548	47.5492	75.6731	55.8767	49.2514	78.2807	61.452	60.1259
B0403.3.1	WBGene00015167	B0403.3	314	393	241	289	256	270	282	211	160	305	264	254	66	114	37	0	14	9	53	28	19	19	9	9	5.51431	6.65431	4.36534	4.65438	4.50118	4.42148	4.28444	3.74075	3.45323	4.99626	4.23199	3.98179	9.23537	10.323	8.03063	0	4.68795	2.45869	8.55915	8.15999	4.31111	4.42268	3.68118
B0403.5.1	WBGene00015169	B0403.5	175	170	144	197	162	169	119	143	117	115	99	122	16	25	13	8	0	11	13	0	20	6	1	10	3.07326	2.87846	2.60833	3.17271	2.84841	2.76752	1.80797	2.5352	2.52517	1.88384	1.58699	1.91251	2.23888	2.26382	2.82157	2.19068	0	3.00507	2.09941	0	4.53801	1.39664	0.40902
B0403.6.1	WBGene00043982	B0403.6	94	130	129	101	86	121	114	119	112	151	223	151	24	45	16	12	0	9	15	10	21	17	0	9	1.65078	2.20117	2.33663	1.62662	1.51212	1.98148	1.73201	2.10971	2.41726	2.47356	3.57475	2.36713	3.35832	4.07488	3.4727	3.28602	0	2.45869	2.4224	2.91428	4.76491	3.95713	0
B0410.1.1	WBGene00015170	B0410.1	0	0	0	0	1	0	0	1	0	0	0	1	0	0	0	0	0	0	0	0	0	0	0	0	0	0	0	0	0.0175827	0	0	0.0177287	0	0	0	0.0156763	0	0	0	0	0	0	0	0	0	0	0
B0410.3.1	WBGene00015172	B0410.3	415	485	685	337	327	660	526	849	471	414	457	648	65	86	282	40	65	112	94	89	62	66	26	51	7.28802	8.21207	12.4077	5.42742	5.74956	10.8081	7.99154	15.0516	10.1654	6.78181	7.32583	10.1583	9.09544	7.78754	61.2064	10.9534	21.7655	30.5971	15.1804	25.9371	14.0678	15.363	10.6345
B0416.10.1	WBGene00206482	B0416.10	0	0	1	1	4	4	1	0	1	0	0	0	1	0	0	0	0	0	0	0	0	0	0	0	0	0	0.0181134	0.0161051	0.070331	0.0655033	0.015193	0	0.0215827	0	0	0	0.13993	0	0	0	0	0	0	0	0	0	0
B0416.11.1	WBGene00206483	B0416.11	14	12	9	12	8	7	17	19	13	7	14	18	8	9	0	0	4	0	0	15	0	0	6	0	0.245861	0.203185	0.163021	0.193261	0.140662	0.114631	0.258282	0.336845	0.280575	0.114668	0.224424	0.282174	1.11944	0.814975	0	0	1.33941	0	0	4.37143	0	0	2.45412
B0416.2.1	WBGene00015178	B0416.2	1	0	0	0	1	0	2	1	0	0	2	0	0	0	0	0	6	0	0	0	0	0	0	0	0.0175615	0	0	0	0.0175827	0	0.0303861	0.0177287	0	0	0.0320605	0	0	0	0	0	2.00912	0	0	0	0	0	0
B0416.3.1	WBGene00015179	B0416.3	42	32	27	28	24	42	41	41	26	35	38	22	0	3	10	0	0	0	0	0	2	0	1	0	0.737583	0.541827	0.489063	0.450943	0.421986	0.687785	0.622915	0.726875	0.56115	0.573342	0.60915	0.344879	0	0.271658	2.17044	0	0	0	0	0	0.453801	0	0.40902
B0416.4.1	WBGene00015180	B0416.4	2	3	2	0	0	1	2	4	1	0	0	1	2	3	0	0	0	0	0	0	0	0	0	0	0.035123	0.0507963	0.0362269	0	0	0.0163758	0.0303861	0.0709147	0.0215827	0	0	0.0156763	0.27986	0.271658	0	0	0	0	0	0	0	0	0
B0416.5a.1	WBGene00015181	B0416.5	1556	1751	1582	1919	1771	1905	1894	1797	1330	1731	1862	1772	275	530	118	183	190	224	278	122	201	156	98	139	27.3257	29.6481	28.6554	30.9057	31.139	31.196	28.7756	31.8584	28.705	28.3558	29.8483	27.7785	38.4807	47.993	25.6112	50.1118	63.6222	61.1942	44.8952	35.5543	45.607	36.3125	40.084
B0416.5b.1	WBGene00015181	B0416.5	1547	1745	1580	1907	1765	1900	1879	1787	1327	1720	1855	1760	186	399	99	143	102	164	208	110	180	108	86	111	27.1676	29.5465	28.6192	30.7124	31.0336	31.1141	28.5477	31.6811	28.6402	28.1756	29.7361	27.5903	26.027	36.1306	21.4874	39.1584	34.1551	44.8029	33.5906	32.0571	40.8421	25.1394	35.1757
B0416.7a.1	WBGene00015182	B0416.7	3	4	5	13	6	6	20	27	15	17	20	19	12	3	7	0	0	0	0	0	6	0	2	8	0.0526845	0.0677284	0.0905671	0.209366	0.105496	0.098255	0.303861	0.478674	0.32374	0.27848	0.320605	0.29785	1.67916	0.271658	1.51931	0	0	0	0	0	1.3614	0	0.81804
B0416.7b.1	WBGene00015182	B0416.7	3	4	4	13	6	5	20	26	14	16	18	16	0	3	0	0	0	0	0	22	3	0	0	3	0.0526845	0.0677284	0.0724537	0.209366	0.105496	0.0818792	0.303861	0.460945	0.302158	0.262099	0.288545	0.250821	0	0.271658	0	0	0	0	0	6.41142	0.680702	0	0
B0432.1.1	WBGene00015183	B0432.1	5	1	0	3	3	2	6	3	2	0	1	5	0	0	0	0	0	0	0	0	0	0	0	0	0.0878075	0.0169321	0	0.0483153	0.0527482	0.0327517	0.0911583	0.053186	0.0431654	0	0.0160303	0.0783816	0	0	0	0	0	0	0	0	0	0	0
B0432.10.1	WBGene00015191	B0432.10	19	15	27	15	17	30	22	32	23	28	24	45	0	12	0	0	0	0	0	0	3	5	0	2	0.333668	0.253981	0.489063	0.241577	0.298907	0.491275	0.334247	0.567317	0.496402	0.458673	0.384726	0.705435	0	1.08663	0	0	0	0	0	0	0.680702	1.16386	0
B0432.10.2	WBGene00015191	B0432.10	19	15	27	15	17	30	22	32	23	28	24	45	0	12	0	0	0	0	0	0	3	5	0	2	0.333668	0.253981	0.489063	0.241577	0.298907	0.491275	0.334247	0.567317	0.496402	0.458673	0.384726	0.705435	0	1.08663	0	0	0	0	0	0	0.680702	1.16386	0
B0432.10.3	WBGene00015191	B0432.10	19	15	27	15	17	30	22	32	23	28	24	45	0	12	0	0	0	0	0	0	3	5	0	2	0.333668	0.253981	0.489063	0.241577	0.298907	0.491275	0.334247	0.567317	0.496402	0.458673	0.384726	0.705435	0	1.08663	0	0	0	0	0	0	0.680702	1.16386	0
B0432.11.1	WBGene00015192	B0432.11	0	0	1	0	0	0	0	0	0	0	0	0	0	0	0	0	0	0	0	0	0	0	0	0	0	0	0.0181134	0	0	0	0	0	0	0	0	0	0	0	0	0	0	0	0	0	0	0	0
B0432.14a.1	WBGene00044640	B0432.14	46	46	39	27	45	34	47	34	36	54	58	69	8	16	0	0	5	0	0	0	3	10	0	6	0.807829	0.778876	0.706424	0.434838	0.791224	0.556778	0.714073	0.602775	0.776977	0.884584	0.929755	1.08167	1.11944	1.44885	0	0	1.67427	0	0	0	0.680702	2.32773	0
[truncated: 32,159 more rows]
[truncated: 35 more columns]
