# Supplementary material
Source: Research Square preprint supplement (doi:10.21203/rs.3.rs-9541370/v1)
Supplement: Supplementary file 10 [file a0d41ce511ff587b7f49d66e.xlsx]

## Sheet: Sheet1
Protein IDs	Gene name	Protein names	WormBase	logFC glp1_ncl1_on_luci_rep_1 / glp1_on_luci	logFC glp1_ncl1_on_mrps16 / glp1_ncl1_on_luci_rep_1	logFC glp1_ncl1_on_mrps16 / glp1_on_luci	logFC glp1_ncl1_on_popl1 / glp1_ncl1_on_luci_rep_1	logFC glp1_ncl1_on_popl1 / glp1_on_luci	Significant_direction glp1_ncl1_on_luci_rep_1 / glp1_on_luci	Significant_direction glp1_ncl1_on_mrps16 / glp1_ncl1_on_luci_rep_1	Significant_direction glp1_ncl1_on_mrps16 / glp1_on_luci	Significant_direction glp1_ncl1_on_popl1 / glp1_ncl1_on_luci_rep_1	Significant_direction glp1_ncl1_on_popl1 / glp1_on_luci
G5EC67	2O16	2O16	WBGene00013210	0.391	-0.993	-0.602	0.292	0.682	up	down	down		up
G5ED94	3A339	3A339	WBGene00016217	-0.098	-0.028	-0.126	-0.006	-0.104
G5EEZ4	3E324	WD repeat-containing protein 55	WBGene00012858	1.662	-0.045	1.618	0.081	1.743	up		up		up
G5EBI0	4D656	Endoplasmic reticulum transmembrane protein	WBGene00021883	0.129	0.062	0.191	0.004	0.133
G5EF26	5N226	Alpha-2-MRAP_C domain-containing protein	WBGene00007606	0.128	0.087	0.215	-0.061	0.067
Q19004	aagr-1	P-type domain-containing protein	WBGene00017071	-0.409	1.179	0.77	-0.519	-0.928		up	up		down
Q21750	aagr-2	P-type domain-containing protein	WBGene00019895	0.227	-0.085	0.141	-0.458	-0.231	up			down	down
Q20239	aagr-3	DUF5110 domain-containing protein	WBGene00009583	0.04	0.037	0.077	-0.01	0.03
O17352	aagr-4	Gal_mutarotas_2 domain-containing protein	WBGene00018682	0.022	0.983	1.004	0.487	0.509		up	up	up	up
P45894	aak-1	5'-AMP-activated protein kinase catalytic subunit alpha-1	WBGene00019801	-0.091	-0.541	-0.632	-0.149	-0.241		down	down
Q95ZQ4	aak-2	5'-AMP-activated protein kinase catalytic subunit alpha-2	WBGene00020142	-0.149	-0.024	-0.174	0.085	-0.064	down		down
Q9XUY2	aakb-1	AMPKBI domain-containing protein	WBGene00010115	-0.102	-0.082	-0.184	0.115	0.013			down
Q9NAH7	aakb-2	AMPKBI domain-containing protein	WBGene00012928	-0.094	-0.241	-0.335	-0.046	-0.139		down	down
A0A1T5HUK9	aakg-1	AMP-Activated protein Kinase Gamma subunit	WBGene00013732	0.001	-0.185	-0.184	0.024	0.024
O02168	aakg-2	AMP-Activated protein Kinase Gamma subunit	WBGene00020633	-0.292	-0.118	-0.41	0.028	-0.263	down		down		down
H2L0K0	aakg-4	AMP-Activated protein Kinase Gamma subunit	WBGene00020135	0.047	-0.171	-0.124	-0.1	-0.053
O01541	aars-2	Alanine--tRNA ligase, cytoplasmic	WBGene00000197	0.708	-0.056	0.652	0.068	0.776	up		up		up
U4PFH6	aass-1	Lysine ketoglutarate reductase	WBGene00019819	0.042	0.566	0.608	0.089	0.132		up	up
Q19834	aat-1	Amino Acid Transporter	WBGene00000002	-0.592	0.349	-0.243	0.445	-0.147	down	up	down	up
Q7YXH5	aat-4	Amino Acid Transporter	WBGene00000005	0.284	-1.834	-1.55	-1.461	-1.177
Q9GUM5	aatf-1	AATF homolog	WBGene00022269	0.927	0.026	0.953	0.094	1.021	up		up		up
Q9U2K8	abce-1	ABC transporter, class E	WBGene00012714	0.908	0.034	0.942	0.094	1.001	up		up		up
Q19554	abcf-1	ABC transporter, class F	WBGene00006512	0.488	0.128	0.616	0.171	0.659	up		up	up	up
G5EFG4	abcf-2	ABC transporter, class F	WBGene00012097	0.576	0.19	0.766	0.135	0.711	up	up	up		up
Q20306	abcf-3	ABC transporter, class F	WBGene00018339	0.436	0.064	0.5	0.018	0.453	up		up		up
G5EFQ2	abf-5	ABF-5	WBGene00000016	-0.528	-0.498	-1.026	-0.001	-0.529			down
O45707	abhd-11.2	AB hydrolase-1 domain-containing protein	WBGene00011029	-0.022	0.169	0.148	-0.163	-0.184
Q9U1Z6	abhd-3.1	Hydrolase_4 domain-containing protein	WBGene00013358	-0.722	0.79	0.068	0.597	-0.125		up
H2KZ86	abhd-5.2	Abhydrolase domain-containing protein abhd-5.2	WBGene00016507	-0.142	-0.166	-0.308	0.334	0.192
Q10929	abi-1	SH3 domain-containing protein	WBGene00015146	-0.085	-1.093	-1.178	0.232	0.147
Q9TXV8	abt-4	ABC Transporter family	WBGene00000022	-0.305	0.154	-0.151	0.064	-0.241	down				down
G4SRS5	abtm-1	ABC Transporter, Mitochondrial	WBGene00022281	0.743	0.335	1.078	-0.001	0.742	up	up	up		up
B3WFV9	abts-1	Anion exchange protein	WBGene00009920	-0.121	-0.203	-0.323	0.015	-0.106		down	down
G5EGB9	abts-2	Anion transporter ABTS-2	WBGene00009929	-0.423	0.008	-0.415	-0.934	-1.357					down
Q58QG8	abts-4	Anion transporter ABTS-4a	WBGene00019844	0.044	-0.706	-0.662	-0.379	-0.335		down	down
Q17405	AC3.5	Aminopeptidase-like protein AC3.5	WBGene00007071	0.325	0.182	0.507	0.159	0.485	up	up	up		up
O45552	acaa-2	ACetyl-CoA Acyltransferase 2 homolog	WBGene00009952	-0.3	0.338	0.038	0.024	-0.275	down	up			down
O01805	acbp-1	Acyl-CoA-binding protein homolog 1	WBGene00016655	-0.397	0.142	-0.256	0.109	-0.288	down		down		down
Q20507	acbp-3	Acyl-CoA-binding protein homolog 3	WBGene00009818	-0.619	0.063	-0.556	0.111	-0.508	down		down		down
Q9XVJ0	acbp-5	Acyl-CoA-binding domain-containing protein 6	WBGene00011731	0.016	0.15	0.166	-0.135	-0.12
Q9XXJ2	acbp-6	ACB domain-containing protein	WBGene00012457	-0.076	0.685	0.609	0.438	0.362		up	up
H2KZG6	acdh-1	Acyl CoA DeHydrogenase	WBGene00016943	-0.526	2.385	1.859	0.068	-0.458		up	up
Q22347	acdh-10	Probable medium-chain specific acyl-CoA dehydrogenase 10, mitochondrial	WBGene00020366	0.242	-0.228	0.014	-0.35	-0.108	up	down		down
Q9XWZ2	acdh-11	Acyl-CoA dehydrogenase family member 11	WBGene00012860	-0.187	0.316	0.129	0.086	-0.101	down	up
Q19057	acdh-12	Acyl CoA DeHydrogenase	WBGene00017125	-0.295	0.314	0.019	0.094	-0.201	down	up			down
H2KYN3	acdh-13	Acyl CoA DeHydrogenase	WBGene00001566	0.288	0.112	0.4	-0.037	0.251	up		up		up
O44549	acdh-3	Acyl CoA DeHydrogenase	WBGene00019433	0.148	0.345	0.493	0.002	0.15	up	up	up		up
Q22781	acdh-7	Acyl CoA DeHydrogenase	WBGene00020812	0.119	-0.261	-0.142	-0.314	-0.195		down	down	down	down
Q95YB2	acdh-9	Acyl CoA DeHydrogenase	WBGene00017874	0.282	0.316	0.598	-0.037	0.245	up	up	up		up
O01590	acds-10	ACaD (ACAD, acyl-CoA Dehydrogenase) Sequence homolog	WBGene00019599	-0.162	0.148	-0.014	0.055	-0.108	down	up
Q18599	acer-1	Acetyl-CoA hydrolase	WBGene00016630	-0.004	0.423	0.419	0.022	0.018		up	up
Q93841	acl-1	Putative 1-acyl-sn-glycerol-3-phosphate acyltransferase acl-1	WBGene00010339	0.537	0.199	0.736	-0.052	0.485	up	up	up		up
A0A486WXW2	acl-14	PlsC domain-containing protein	WBGene00019465	-0.389	-0.132	-0.521	-0.053	-0.442	down		down		down
Q22267	acl-2	Putative 1-acyl-sn-glycerol-3-phosphate acyltransferase acl-2	WBGene00011543	0.054	0.175	0.229	0.076	0.13			up
Q23598	acl-3	Tafazzin family protein	WBGene00006491	0.361	0.321	0.681	-0.036	0.325	up	up	up		up
Q9N5S8	acl-4	PlsC domain-containing protein	WBGene00018657	0.056	0.061	0.117	0.137	0.194
Q21812	acl-5	PlsC domain-containing protein	WBGene00011106	0.138	0.09	0.228	-0.035	0.103			up
Q22949	acl-6	Probable glycerol-3-phosphate acyltransferase, mitochondrial	WBGene00017261	0.01	0.036	0.046	-0.207	-0.197
O16526	acl-8	PlsC domain-containing protein	WBGene00020264	0.072	-0.226	-0.154	-0.187	-0.115
Q23087	acl-9	PlsC domain-containing protein	WBGene00022646	0.267	-0.153	0.114	-0.205	0.062	up
P53585	acly-1	Probable ATP-citrate synthase	WBGene00016995	-0.675	0.063	-0.613	0.157	-0.519	down		down		down
P90731	acly-2	ATP-citrate synthase	WBGene00007150	-0.643	-0.072	-0.714	0.073	-0.57	down		down		down
Q23500	aco-1	Cytoplasmic aconitate hydratase	WBGene00000040	-0.239	0.325	0.085	0.144	-0.095	down	up		up	down
P34455	aco-2	Probable aconitate hydratase, mitochondrial	WBGene00000041	0.023	0.313	0.335	0.027	0.049		up	up
O62140	acox-1.1	Acyl-coenzyme A oxidase acox-1.1	WBGene00008564	-0.135	0.123	-0.012	-0.098	-0.233					down
O62137	acox-1.2	Acyl-coenzyme A oxidase acox-1.2	WBGene00008565	-0.203	0.356	0.153	-0.051	-0.254
O62139	acox-1.4	Acyl-coenzyme A oxidase acox-1.4	WBGene00008567	-0.148	0.419	0.271	0.052	-0.096		up	up
P34355	acox-1.5	Probable acyl-coenzyme A oxidase acox-1.5	WBGene00008167	-0.261	0.249	-0.012	-0.088	-0.349	down				down
Q93839	acox-1.6	Acyl-coenzyme A oxidase	WBGene00010336	0.167	0.328	0.495	-0.067	0.1		up	up
Q20992	acox-3	Acyl-coenzyme A oxidase acox-3	WBGene00019060	-0.421	0.225	-0.196	0.1	-0.32	down	up	down		down
Q23534	acp-1	Putative acid phosphatase 1	WBGene00022770	-0.239	0	-0.239	0.168	-0.07
Q19390	acp-5	ACid Phosphatase family	WBGene00017427	-0.232	0.123	-0.109	0.012	-0.219	down				down
Q9GUF2	acp-6	ACid Phosphatase family	WBGene00022245	-0.603	0.458	-0.145	0.689	0.086	down	up		up
Q9GUF1	acp-7	ACid Phosphatase family	WBGene00022246	0.328	-0.06	0.267	0.033	0.36	up				up
Q9UAV8	acs-1	Fatty Acid CoA Synthetase family	WBGene00018488	-0.071	0.038	-0.033	0.02	-0.052
Q20264	acs-11	Fatty Acid CoA Synthetase family	WBGene00018269	0.469	0.443	0.911	-0.043	0.425	up	up	up		up
V6CLI5	acs-13	Long-chain-fatty-acid--CoA ligase	WBGene00022037	-0.495	-0.073	-0.568	-0.066	-0.561	down		down		down
Q19339	acs-14	Fatty Acid CoA Synthetase family	WBGene00008669	-0.209	0.034	-0.176	0.023	-0.186	down		down		down
A0A4V0ING4	acs-17	Fatty Acid CoA Synthetase family	WBGene00016716	-0.18	-0.333	-0.513	0.148	-0.032	down	down	down
Q18496	acs-19	Acetyl-coenzyme A synthetase	WBGene00007969	-1.892	-0.275	-2.166	0.388	-1.503	down		down		down
O18693	acs-2	Fatty Acid CoA Synthetase family	WBGene00009221	0.102	-0.597	-0.495	1.106	1.208
O16481	acs-21	Fatty Acid CoA Synthetase family	WBGene00016849	-0.02	0.236	0.216	0.149	0.129		up	up		up
Q18916	acs-22	Fatty Acid CoA Synthetase family	WBGene00017012	-0.461	-0.024	-0.485	-0.175	-0.637	down		down		down
O44560	acs-3	Long-chain-fatty-acid--CoA ligase	WBGene00020343	-0.101	-0.041	-0.141	-0.02	-0.121
Q20121	acs-4	Fatty Acid CoA Synthetase family	WBGene00018152	-0.168	-0.022	-0.19	0.013	-0.155	down		down		down
Q9XWD1	acs-5	Long-chain-fatty-acid--CoA ligase	WBGene00013575	-0.181	0.365	0.185	-0.015	-0.195	down	up	up		down
Q8T8B9	acsd-1	2-amino-3-carboxymuconate-6-semialdehyde decarboxylase	WBGene00022104	-0.142	0.432	0.29	0.259	0.117		up	up	up
P0DM41;P0DM42	act-1	Actin-1;Actin-3	WBGene00000063	-0.054	-0.07	-0.124	0.085	0.031
P10984	act-2	Actin-2	WBGene00000064	0.517	-0.028	0.489	-0.159	0.358	up		up		up
O45815	act-5	ACTin	WBGene00000067	0.081	-0.08	0.001	-0.063	0.018
H2KYI5	adah-1	A_deaminase domain-containing protein	WBGene00015551	-0.263	0.089	-0.174	0.101	-0.162	down		down		down
G5EDW1	adbp-1	Adr-2-binding protein 1	WBGene00012157	-0.163	-0.113	-0.276	0.069	-0.094			down
Q20952	add-2	Adducin-related protein 2	WBGene00000073	0.08	-0.159	-0.079	0.02	0.1
Q93934	adk-1	Adenosine kinase	WBGene00011128	-0.063	0.291	0.229	0.396	0.333		up	up	up	up
Q9U3D6	adr-1	A-to-I RNA editing regulator adr-1	WBGene00000079	0.006	-0.063	-0.057	-0.173	-0.167				down	down
O45218	ads-1	Alkyldihydroxyacetonephosphate synthase	WBGene00000081	-0.167	0.221	0.055	0.015	-0.152	down	up			down
Q21774	adsl-1	Adenylosuccinate lyase	WBGene00011064	-0.195	0.256	0.061	0.13	-0.065	down	up
P91134	adss-1	Adenylosuccinate synthetase	WBGene00016509	-0.384	-0.011	-0.395	0.118	-0.267	down		down	up	down
Q19204	adt-2	A disintegrin and metalloproteinase with thrombospondin motifs adt-2	WBGene00000083	0.71	-0.438	0.272	-0.308	0.402	up
Q18974	afmd-1	Abhydrolase_3 domain-containing protein	WBGene00017051	-0.281	-0.01	-0.292	0.008	-0.273	down		down		down
O62460	afmd-2	Abhydrolase_3 domain-containing protein	WBGene00012866	-0.31	0.126	-0.184	0.076	-0.234	down		down		down
G5EFH7	agef-1	SEC7 domain-containing protein	WBGene00012386	-0.13	-0.111	-0.242	-0.044	-0.174			down		down
O62334	agl-1	Glycogen debranching enzyme	WBGene00011050	0.069	-0.004	0.065	0.099	0.167					up
Q94055	agxt-1	Alanine--glyoxylate aminotransferase	WBGene00011767	0.254	0.002	0.256	-0.002	0.252	up		up		up
Q10906;Q10928	AH9.3	Uncharacterized protein AH9.3;Uncharacterized protein B0302.5	WBGene00014999	-0.396	-0.763	-1.159	-0.186	-0.582		down	down		down
O02219	aha-1	Aryl hydrocarbon receptor nuclear translocator homolog	WBGene00000095	-0.311	0.387	0.076	0.081	-0.23
P27604	ahcy-1	Adenosylhomocysteinase	WBGene00019322	0.104	0.285	0.39	0.278	0.383		up	up	up	up
Q21221	aho-3	Alpha/beta hydrolase domain-containing protein aho-3	WBGene00045192	0.06	-0.271	-0.212	-0.01	0.05
Q93168	ahsa-1	Aha1_N domain-containing protein	WBGene00007235	0.158	0.036	0.194	0.161	0.319	up		up	up	up
Q17740	ain-1	ALG-1 INteracting protein	WBGene00015547	-0.006	-0.145	-0.151	-0.028	-0.034
H2KY58	ain-2	ALG-1 INteracting protein	WBGene00015007	-0.13	-0.064	-0.194	0.092	-0.038			down
O17939	aipl-1	WD_REPEATS_REGION domain-containing protein	WBGene00010685	-0.16	-0.143	-0.302	-0.015	-0.174			down		down
Q18888	aipr-1	Aryl hydrocarbon receptor Interacting Protein (AIP) Related	WBGene00016966	-0.045	0.014	-0.031	-0.072	-0.117
A0A1C3NSL9	ajm-1	Apical junction molecule	WBGene00000100	-0.159	-0.051	-0.21	0.031	-0.127	down		down
H2KZI9	aka-1	FYVE-type domain-containing protein	WBGene00000101	0.032	-0.103	-0.071	0.027	0.059
Q09285	akap-1	KH domain-containing protein akap-1	WBGene00016977	0.556	0.02	0.577	0.039	0.596	up		up		up
Q17941	akt-1	Serine/threonine-protein kinase akt-1	WBGene00000102	-0.533	-0.121	-0.654	0.236	-0.296	down		down		down
Q9XTG7	akt-2	Serine/threonine-protein kinase akt-2	WBGene00000103	0.016	-0.235	-0.219	-0.158	-0.141
P54216	aldo-1	Fructose-bisphosphate aldolase 1	WBGene00011474	-0.277	0.046	-0.231	0.032	-0.245	down		down		down
P46563	aldo-2	Fructose-bisphosphate aldolase 2	WBGene00017166	-0.282	-0.038	-0.32	-0.028	-0.31	down		down		down
G5EES3	alg-1	Protein argonaute	WBGene00000105	-0.18	-0.047	-0.228	-0.038	-0.218	down		down		down
O16720	alg-2	Protein argonaute	WBGene00000106	-0.273	-0.177	-0.45	0.005	-0.267	down		down		down
Q22797	algn-1	Asparagine Linked Glycosylation (ALG) homolog, Nematode	WBGene00020820	-0.207	0.038	-0.169	-0.012	-0.218
P53993	algn-11	GDP-Man:Man(3)GlcNAc(2)-PP-Dol alpha-1,2-mannosyltransferase	WBGene00015162	0.195	0.022	0.217	-0.109	0.086			up
P92012	algn-13	N-acetylglucosaminyldiphosphodolichol N-acetylglucosaminyltransferase	WBGene00011193	-0.183	0.343	0.159	0.184	0.001		up
U4PE03	algn-14	Asparagine Linked Glycosylation (ALG) homolog, Nematode	WBGene00019725	-0.032	0.185	0.153	-0.093	-0.125
Q19265	algn-2	Alpha-1,3/1,6-mannosyltransferase ALG2	WBGene00017282	-0.461	0.146	-0.316	0.154	-0.307	down		down		down
E5QCI3	algn-3	Asparagine Linked Glycosylation (ALG) homolog, Nematode	WBGene00010720	0.216	0.259	0.475	-0.377	-0.161
Q8WSL9	algn-5	Dolichyl-phosphate beta-glucosyltransferase	WBGene00019276	0.21	-0.045	0.165	-0.11	0.1	up		up
P54002	algn-9	Alpha-1,2-mannosyltransferase algn-9	WBGene00007556	-0.193	0.27	0.076	-0.013	-0.206
Q20780	alh-1	Aldedh domain-containing protein	WBGene00000107	-0.091	0.388	0.297	0.133	0.042		up	up
Q18822	alh-10	Aldedh domain-containing protein	WBGene00000116	-0.08	-0.147	-0.227	-0.161	-0.241			down		down
Q20352	alh-11	Aldedh domain-containing protein	WBGene00000117	0.047	0.249	0.296	0.121	0.167		up	up
Q7Z1Q3	alh-12	Aldedh domain-containing protein	WBGene00000118	-0.606	0.282	-0.325	0.297	-0.309	down	up	down	up	down
P54889	alh-13	Probable delta-1-pyrroline-5-carboxylate synthase	WBGene00011938	-0.259	0.689	0.43	-0.209	-0.468	down	up	up		down
G5ECV9	alh-3	10-formyltetrahydrofolate dehydrogenase	WBGene00000109	-0.198	0.085	-0.113	0.108	-0.09	down		down
A0A486WWU7	alh-4	Aldehyde dehydrogenase	WBGene00000110	-0.215	0.12	-0.095	-0.012	-0.228	down				down
O44555	alh-5	Aldehyde dehydrogenase	WBGene00000111	0.471	0.2	0.671	0.04	0.511	up		up		up
G5EC31	alh-6	Multifunctional fusion protein	WBGene00000112	0.075	0.271	0.347	0.038	0.114		up	up
O02266	alh-7	Aldedh domain-containing protein	WBGene00000113	-0.137	0.418	0.281	0.18	0.043	down	up	up	up
P52713	alh-8	Probable methylmalonate-semialdehyde dehydrogenase [acylating], mitochondrial	WBGene00000114	-0.138	0.411	0.273	0.14	0.002	down	up	up
P46562	alh-9	Putative aldehyde dehydrogenase family 7 member A1 homolog	WBGene00000115	0.021	0.418	0.439	0.078	0.099		up	up
Q9U3P9	alkb-8	Alkylated DNA repair protein alkB homolog 8	WBGene00007581	0.799	0.009	0.808	-0.037	0.762	up		up		up
Q9U389	allo-1	Allophagy receptor allo-1	WBGene00011292	-0.068	-0.261	-0.329	-0.019	-0.087			down
G5EFL5	alp-1	ALP/Enigma encoding	WBGene00001132	0.337	-0.048	0.289	0.123	0.46	up		up		up
P34552	alx-1	Apoptosis-linked gene 2-interacting protein X 1	WBGene00007010	-0.103	-0.165	-0.268	-0.065	-0.168		down	down		down
Q17561	aly-1	FoP_duplication domain-containing protein	WBGene00000120	-0.046	-0.201	-0.247	0.02	-0.027
O62183	aly-2	FoP_duplication domain-containing protein	WBGene00000121	-0.073	-0.085	-0.158	0.01	-0.063
Q21559	aly-3	FoP_duplication domain-containing protein	WBGene00000122	0.169	-0.068	0.101	0.093	0.262					up
P16356	ama-1	DNA-directed RNA polymerase II subunit RPB1	WBGene00000123	-0.176	0.146	-0.03	0.233	0.056
Q20829	aman-1	Alpha-mannosidase	WBGene00018877	-0.608	-0.08	-0.688	0.064	-0.545	down		down		down
Q2PJ74	aman-2	Alpha-mannosidase	WBGene00010284	-0.211	0.001	-0.21	-0.01	-0.221	down		down		down
O01574	aman-3	Alpha-mannosidase	WBGene00018594	-0.455	-0.469	-0.924	-0.082	-0.537			down
Q22419	amdh-1	Probable imidazolonepropionase	WBGene00020436	0.091	0.274	0.364	-0.016	0.074		up	up
A0A2C9C377	ampd-1	AMP deaminase	WBGene00016415	-0.476	0.235	-0.242	0.266	-0.21	down	up	down	up	down
Q21004	amph-1	AMPHiphysin homolog	WBGene00010272	-0.051	-0.034	-0.086	0.002	-0.05
Q17663	amt-4	Ammonium transporter	WBGene00000136	0.171	0.124	0.295	-0.253	-0.083			up
Q9XXU5	amx-2	Amino_oxidase domain-containing protein	WBGene00000138	0.138	-0.231	-0.094	-0.118	0.019
G5EDH7	anat-1	AANAT (Arylalkylamine N-AcetylTransferase) homolog	WBGene00015938	0.05	-0.059	-0.009	-0.029	0.021
Q9N4M4	anc-1	Nuclear anchorage protein 1	WBGene00000140	0.051	-0.302	-0.252	-0.154	-0.104		down	down	down	down
Q22317	anp-1	Aminopeptidase	WBGene00011587	-0.648	-0.816	-1.464	0.027	-0.621	down	down	down		down
O45865	ant-1.1	ADP/ATP translocase	WBGene00006439	-0.18	0.235	0.055	0.191	0.011
G5EFU2;G5EFW8	ant-1.4	ADP/ATP translocase	WBGene00020140	-0.452	0.227	-0.224	0.276	-0.176	down
Q17820	aos-1	SUMO-activating enzyme subunit aos-1	WBGene00000142	0.014	0.033	0.047	0.079	0.093
Q22601	apa-2	AP-2 complex subunit alpha	WBGene00000161	-0.068	-0.01	-0.077	0.011	-0.057
Q9N4F3	apb-1	AP complex subunit beta	WBGene00000160	-0.098	-0.011	-0.109	0.026	-0.071	down		down
O45718	apb-3	AP-3 complex subunit beta	WBGene00000163	-0.09	0.017	-0.073	0.024	-0.066
O16637	apd-3	AP-3 complex subunit delta	WBGene00000162	-0.123	-0.201	-0.324	0.075	-0.048
Q8WQB3	apg-1	AP-1 complex subunit gamma	WBGene00000158	-0.293	-0.023	-0.317	0.09	-0.204	down		down		down
Q10651	apl-1	Amyloid-beta-like protein	WBGene00000149	-0.102	-0.036	-0.138	0.082	-0.02
O01755	apm-1	MHD domain-containing protein	WBGene00000150	-0.201	0.016	-0.185	0.068	-0.133	down		down		down
Q20736	apm-3	MHD domain-containing protein	WBGene00000164	-0.101	-0.035	-0.136	0.048	-0.053
O44750	app-1	Xaa-Pro aminopeptidase app-1	WBGene00000155	-0.216	0.01	-0.206	-0.136	-0.352	down		down		down
O16369	aps-1	AP complex subunit sigma	WBGene00000159	-0.347	-0.096	-0.443	0.243	-0.104			down
Q19123	aps-2	AP complex subunit sigma	WBGene00000157	-0.094	-0.105	-0.199	0.059	-0.035			down
Q19202	apy-1	Apyrase apy-1	WBGene00017244	-0.046	0.565	0.519	-0.05	-0.096		up	up
Q19949	aqp-1	AQuaPorin or aquaglyceroporin related	WBGene00000169	0.368	0.971	1.339	-0.182	0.185		up	up
Q17571	aqp-2	AQuaPorin or aquaglyceroporin related	WBGene00000170	-0.217	-0.056	-0.273	0.163	-0.054			down
G5EEK0	aqp-4	AQuaPorin or aquaglyceroporin related	WBGene00000172	-0.038	-0.409	-0.446	-0.209	-0.246		down	down
A0A6V7QYI0	aqp-7	AQuaPorin or aquaglyceroporin related	WBGene00000175	-0.694	0.257	-0.437	0.064	-0.63	down				down
Q9TZN1	arch-1	Protein archease-like	WBGene00016621	-0.191	-0.249	-0.439	-0.081	-0.272			down		down
Q19102	ard-1	Alcohol/Ribitol Dehydrogenase family	WBGene00000181	0.023	0.559	0.582	0.129	0.151		up	up		up
Q10943	arf-1.2	ADP-ribosylation factor 1-like 2	WBGene00000182	-0.32	0.106	-0.214	0.286	-0.034	down
G5EFK4	arf-3	ADP-ribosylation factor	WBGene00000183	-0.289	0.102	-0.187	0.236	-0.053	down		down	up
Q9U2S4	arf-6	ADP-ribosylation factor 6	WBGene00000184	0.086	-0.184	-0.098	-0.089	-0.003		down
O45518	argk-1	Arginine kinase	WBGene00009706	-0.497	0.592	0.095	-0.212	-0.709					down
A0A1X7RC97	argn-1	ARGiNase Homolog	WBGene00020658	-0.362	0.922	0.56	0.286	-0.077	down	up	up
O01965	ari-1.1	E3 ubiquitin-protein ligase ari-1.1	WBGene00016158	-0.157	-0.233	-0.39	0.034	-0.123	down	down	down
Q20758	arl-1	ADP-ribosylation factor-like protein 1	WBGene00000187	-0.071	-0.032	-0.103	0.114	0.043
P34212	arl-5	ADP-ribosylation factor-like protein 5	WBGene00000189	-0.413	0.068	-0.345	0.282	-0.131
G5EDC6	arl-8	ARF-Like	WBGene00000192	0.004	-0.18	-0.176	-0.036	-0.032		down	down
Q9NA98	arp-1	Actin-Related Proteins	WBGene00013168	0.052	-0.042	0.01	-0.071	-0.019
Q9GYR2	arp-11	Actin-Related Proteins	WBGene00016793	0.109	-0.094	0.015	-0.27	-0.161				down
P51485	arr-1	Beta-arrestin arr-1	WBGene00000195	-0.144	-0.189	-0.333	-0.121	-0.265		down	down		down
O17982	arrd-13	Arrestin_C domain-containing protein	WBGene00011054	-0.02	0.193	0.173	0.793	0.773
O17983	arrd-14	Arrestin_C domain-containing protein	WBGene00011055	0.243	-0.157	0.085	0.03	0.273
Q9GYT5	arrd-18	Arrestin_C domain-containing protein	WBGene00018060	0.53	0.145	0.675	0.208	0.738	up		up		up
P91469	arrd-22	Arrestin_C domain-containing protein	WBGene00020612	0.084	0.173	0.257	0.169	0.252
Q17624	arrd-25	Arrestin_C domain-containing protein	WBGene00007296	-0.073	-0.078	-0.152	0.13	0.057			down
Q9N5Y2	art-1	Probable very-long-chain enoyl-CoA reductase art-1	WBGene00000198	-0.538	0.296	-0.242	0.148	-0.391	down	up	down		down
Q9N4I0	arx-1	Actin-related protein 3	WBGene00000199	-0.066	-0.067	-0.132	-0.024	-0.089			down
P53489	arx-2	Actin-related protein 2	WBGene00000200	0.079	-0.134	-0.055	-0.143	-0.063		down		down
A0A3P6PCS5	arx-3	Actin-related protein 2/3 complex subunit	WBGene00000201	-0.161	-0.005	-0.165	0.082	-0.079	down		down
Q8WTM6	arx-4	Probable actin-related protein 2/3 complex subunit 2	WBGene00021170	-0.111	0.001	-0.111	0.113	0.001
Q9XWV3	arx-5	Probable actin-related protein 2/3 complex subunit 3	WBGene00000203	-1.17	-0.072	-1.242	1.174	0.005			down
P58798	arx-6	Probable actin-related protein 2/3 complex subunit 4	WBGene00000204	-0.534	0.085	-0.449	0.433	-0.101	down		down	up
O61861	arx-7	Actin-related protein 2/3 complex subunit 5	WBGene00000205	-0.023	-0.022	-0.045	0.074	0.051
O45686	asah-1	Acid ceramidase	WBGene00010769	-0.308	0.348	0.041	-0.61	-0.917					down
Q09551	asah-2	Probable acid ceramidase	WBGene00009192	-0.602	0.793	0.191	-0.344	-0.946	down	up			down
Q20053	asb-1	ATP synthase F(0) complex subunit B1, mitochondrial	WBGene00000206	-0.335	0.113	-0.222	0.319	-0.016	down
Q19126	asb-2	ATP synthase F(0) complex subunit B2, mitochondrial	WBGene00000207	0.002	-0.388	-0.387	0.106	0.108		down	down
A9Z1L6	ascc-1	KH domain-containing protein	WBGene00016019	-0.25	-0.115	-0.365	0.178	-0.072			down
P90921	asg-1	Probable ATP synthase subunit g 1, mitochondrial	WBGene00000209	0.123	-0.965	-0.842	0.046	0.169		down	down
Q18803	asg-2	Probable ATP synthase subunit g 2, mitochondrial	WBGene00000210	-0.04	-0.359	-0.399	0.088	0.048		down	down
Q9UAY4	asm-3	Putative sphingomyelin phosphodiesterase asm-3	WBGene00000213	-0.557	0.951	0.394	-0.507	-1.063		up			down
P30632	asna-1	ATPase asna-1	WBGene00014025	-0.293	-0.062	-0.354	0.044	-0.248	down		down		down
Q21463	asns-2	Asparagine synthetase [glutamine-hydrolyzing]	WBGene00019730	-1.403	-0.121	-1.524	0.324	-1.078	down		down		down
G5EEI4	asp-1	Aspartic protease 1	WBGene00000214	-1.472	1.644	0.172	-0.511	-1.982	down	up			down
Q22972	asp-13	Peptidase A1 domain-containing protein	WBGene00017881	-1.461	0.995	-0.466	-0.179	-1.64	down	up			down
Q94271	asp-14	Peptidase A1 domain-containing protein	WBGene00019619	-2.236	2.503	0.267	0.839	-1.397	down	up			down
Q8MYN5	asp-17	Aspartic protease 17	WBGene00012683	-1.188	1.069	-0.119	0.048	-1.14
Q86NE0	asp-2	Peptidase A1 domain-containing protein	WBGene00000215	-1.93	1.488	-0.442	-0.701	-2.631	down	up			down
P55956	asp-3	Aspartic protease 3	WBGene00000216	-0.968	1.035	0.067	-0.147	-1.114	down	up			down
Q21966	asp-4	Aspartic protease 4	WBGene00000217	-0.647	-0.322	-0.969	-0.079	-0.726	down	down	down		down
O01532	asp-5	Peptidase A1 domain-containing protein	WBGene00000218	-0.934	1.19	0.255	-0.616	-1.551	down	up			down
O01530	asp-6	Aspartic protease 6	WBGene00000219	-1.54	1.137	-0.404	0.232	-1.308	down	up			down
O16338	asp-8	Peptidase A1 domain-containing protein	WBGene00019105	-1.994	1.016	-0.978	-0.425	-2.419	down				down
Q17425	asps-1	TUG-UBL1 domain-containing protein	WBGene00007100	0.036	-0.063	-0.027	-0.121	-0.086
Q20748	atad-3	ATPase family AAA domain-containing protein 3	WBGene00010015	0.718	0.535	1.253	-0.033	0.686	up	up	up		up
P90914	ate-1	Arginyl-tRNA--protein transferase 1	WBGene00010615	-0.148	0.046	-0.102	-0.032	-0.18
Q09406	atg-16.2	Autophagic-related protein 16.2	WBGene00019427	-0.403	0.017	-0.386	0.172	-0.231	down		down
O16466	atg-18	Autophagy-related protein 18	WBGene00018294	-0.147	-0.215	-0.362	-0.045	-0.191		down	down		down
Q21480	atg-2	Autophagy-related protein 2	WBGene00019748	0.044	-0.217	-0.173	-0.029	0.014
Q9N369	atg-3	Autophagy_act_C domain-containing protein	WBGene00021922	0.013	-0.186	-0.173	-0.143	-0.129		down	down		down
K8ESC5	atg-4.1	Cysteine protease atg-4.1	WBGene00013595	-0.295	-0.209	-0.504	-0.083	-0.378	down	down	down		down
Q3V5I7	atg-5	Autophagy-related protein 5	WBGene00022152	-0.024	-0.216	-0.24	-0.165	-0.19		down	down
G5EBK4	atg-7	Ubiquitin-like modifier-activating enzyme ATG7	WBGene00010882	-0.239	-0.031	-0.27	0.037	-0.202	down		down		down
Q9TXN6	atg-9	Autophagy-related protein 9	WBGene00020706	-0.086	-0.247	-0.333	-0.138	-0.224		down	down		down
Q9XVU3	atgp-1	Alpha-glucosidase	WBGene00000224	-0.139	-0.045	-0.184	0.055	-0.084	down		down
O45298	atgp-2	Aamy domain-containing protein	WBGene00000225	0.006	-0.081	-0.075	0.01	0.015
A0A061ACY0	ath-1	Palmitoyl-protein hydrolase	WBGene00010564	-0.137	-0.077	-0.214	0.004	-0.133			down
Q95QQ4	atic-1	Bifunctional purine biosynthesis protein ATIC	WBGene00016957	-0.689	-0.157	-0.846	0.275	-0.414	down		down		down
Q9BMU4	atln-1	GB1/RHD3-type G domain-containing protein	WBGene00021868	-0.227	0.112	-0.115	0.025	-0.202	down				down
Q23158	atn-1	AcTiniN	WBGene00000228	0.16	-0.097	0.063	0.083	0.242	up				up
Q9XXK1	atp-1	ATP synthase subunit alpha, mitochondrial	WBGene00010419	-0.064	0.122	0.058	0.112	0.049
P46561	atp-2	ATP synthase subunit beta, mitochondrial	WBGene00000229	0.089	0.126	0.214	-0.008	0.081			up
Q7JNG1	atp-3	ATP synthase subunit O, mitochondrial	WBGene00000230	0.05	-0.177	-0.127	0.017	0.067		down	down
O16517	atp-4	ATP synthase-coupling factor 6, mitochondrial	WBGene00020275	0.002	-0.396	-0.393	0.051	0.054		down	down
Q17763	atp-5	ATP synthase subunit d, mitochondrial	WBGene00007385	0.084	-0.402	-0.318	0.003	0.087		down	down
P24888	atp-6	ATP synthase subunit a	WBGene00010960	-0.13	-1.238	-1.368	-0.321	-0.451		down	down
O17406	attf-2	AT hook Transcription Factor family	WBGene00017317	0.133	-0.004	0.128	0.111	0.244	up		up		up
G5ED29	atx-2	Ataxin-2 homolog	WBGene00000231	-0.056	-0.17	-0.226	-0.058	-0.114		down	down
O17850	atx-3	Ataxin-3 homolog	WBGene00006446	0.017	-0.103	-0.086	-0.15	-0.134
G5ECH3	avr-15	Neur_chan_memb domain-containing protein	WBGene00000233	-0.288	-0.01	-0.298	-0.017	-0.305
Q17413	B0001.4	Probable uridine-cytidine kinase	WBGene00007089	1.106	0.095	1.201	0.077	1.183	up		up		up
Q17426	B0024.11	Putative pseudouridine synthase B0024.11	WBGene00007101	0.863	-0.072	0.791	0.167	1.03	up		up		up
Q17428	B0024.13	Polyprenol reductase	WBGene00007102	0.42	-0.219	0.202	-0.091	0.329
Q17420	B0024.4	Uncharacterized protein	WBGene00007097	-0.084	0.124	0.039	-1.156	-1.24					down
Q17439	B0035.15	Uncharacterized protein B0035.15	WBGene00007113	0.704	0.706	1.41	-0.396	0.307			up
Q17432	B0035.3	Macro domain-containing protein	WBGene00007106	0.085	0.049	0.134	0.063	0.147
Q4W4Z5	B0205.12	Uncharacterized protein	WBGene00044413	-0.925	0.44	-0.485	0.266	-0.659	down	up	down		down
Q336L1	B0205.13	Uncharacterized protein	WBGene00044644	-2.14	2.6	0.46	-0.996	-3.136	down	up		down	down
Q17457	B0222.5	Uncharacterized protein	WBGene00015056	0.065	0.147	0.211	0.215	0.28
Q09220	B0228.1	Uncharacterized protein B0228.1	WBGene00015059	-0.218	-0.047	-0.265	-0.049	-0.266
O16487	B0238.11	Uncharacterized protein	WBGene00015075	1.172	0.679	1.851	0.032	1.204			up
Q9XTI0	B0250.5	Probable 3-hydroxyisobutyrate dehydrogenase, mitochondrial	WBGene00007122	0.005	0.267	0.272	0.073	0.078		up	up
Q7Z116	B0261.8	Uncharacterized protein	WBGene00015096	-0.123	-0.098	-0.222	0.05	-0.074
P41938	B0272.3	Probable 3-hydroxyacyl-CoA dehydrogenase B0272.3	WBGene00007129	-0.136	0.33	0.194	-0.012	-0.148	down	up	up		down
P41942	B0272.4	Uncharacterized protein B0272.4	WBGene00007130	-0.721	-0.056	-0.777	0.209	-0.513	down		down		down
P42000	B0280.9	U3 small nucleolar RNA-associated protein 18 homolog	WBGene00015104	1.389	-0.051	1.338	-0.01	1.379	up		up		up
O16614	B0281.3	RING-type domain-containing protein	WBGene00015110	0.121	-0.263	-0.142	0.169	0.29		down			up
P34261	B0303.11	Solute carrier family 12 protein B0303.11	WBGene00015131	-0.031	0.041	0.011	-0.001	-0.031
P34255	B0303.3	Probable 3-ketoacyl-CoA thiolase	WBGene00015125	-0.393	0.066	-0.327	0.053	-0.34	down		down		down
P34258	B0303.7	Uncharacterized protein B0303.7	WBGene00015128	-0.059	-0.133	-0.192	-0.061	-0.12			down
Q17477	B0334.5	Uncharacterized protein	WBGene00007145	0.275	-0.001	0.274	-0.14	0.134	up		up
Q7JPQ6	B0361.3	Uncharacterized protein B0361.3	WBGene00015157	-0.032	0.106	0.074	-0.021	-0.053
Q10950	B0361.6	Putative methyltransferase B0361.6	WBGene00015160	2.151	0.068	2.219	0.195	2.346	up		up		up
Q9XU45	B0379.1	Uncharacterized protein	WBGene00007155	0.018	-0.028	-0.011	0.169	0.186
A7LPF5	B0393.9	Uncharacterized protein	WBGene00044636	0.032	-0.892	-0.86	-0.313	-0.28		down	down
Q17499	B0395.3	Carn_acyltransf domain-containing protein	WBGene00007175	-0.624	0.35	-0.274	0.151	-0.473	down	up	down		down
Q11077	B0403.3	Uncharacterized protein B0403.3	WBGene00015167	-0.479	-0.617	-1.096	-0.181	-0.661	down	down	down		down
Q11073	B0416.5	Uncharacterized protein B0416.5	WBGene00015181	0.255	-0.173	0.082	-0.066	0.189	up
O17168	B0454.5	Uncharacterized protein	WBGene00015196	0.141	0.169	0.31	0.163	0.304			up		up
Q09214	B0495.5	Uncharacterized protein B0495.5	WBGene00015204	0.043	0.167	0.21	-0.114	-0.071		up	up
Q09216	B0495.7	Putative endoplasmic reticulum metallopeptidase 1-A	WBGene00015206	-0.001	0.103	0.101	-0.118	-0.119					down
Q09217	B0495.8	Uncharacterized protein B0495.8	WBGene00015207	0.321	-0.076	0.245	-0.121	0.2
Q09218	B0495.9	Uncharacterized protein B0495.9	WBGene00015208	-0.146	0.351	0.205	0.099	-0.047
Q22885	B0507.2	BRO1 domain-containing protein BROX homolog	WBGene00015219	-0.036	-0.138	-0.174	-0.109	-0.145		down	down		down
Q22882	B0507.8	Uncharacterized protein	WBGene00015225	1.126	-1.105	0.022	-1.405	-0.279
O61815	B0511.6	RNA helicase	WBGene00015232	2.021	-0.245	1.776	0.01	2.03	up	down	up		up
O45227	B0513.4	Uncharacterized protein	WBGene00007196	-0.001	-3.205	-3.206	-1.25	-1.251		down	down		down
Q17527	B0564.2	Fe2OG dioxygenase domain-containing protein	WBGene00007202	-0.168	0.121	-0.047	0.057	-0.11
Q03565	baf-1	Barrier-to-autointegration factor 1	WBGene00000235	0.142	-0.177	-0.036	0.105	0.246					up
O44739	bag-1	BAG family molecular chaperone regulator 1	WBGene00000236	-0.1	-0.04	-0.14	-0.022	-0.122
G5ECL4	bam-2	Neurexin-related protein bam-2	WBGene00000237	-0.221	-0.2	-0.421	-0.072	-0.293			down		down
O45137	bas-1	Biogenic Amine Synthesis related	WBGene00000239	-0.269	0.423	0.154	0.046	-0.224	down	up	up		down
O76611	bath-26	MATH domain-containing protein	WBGene00020329	-0.434	-0.236	-0.67	-0.183	-0.616			down		down
O17193	bath-33	BTB domain-containing protein	WBGene00015595	0.316	-0.093	0.223	-0.02	0.296	up				up
Q9NF14	bath-40	BTB and MATH domain-containing protein 40	WBGene00013689	0.047	-0.052	-0.005	0.06	0.107
Q23590	baz-2	Bromodomain adjacent to zinc finger domain protein 2	WBGene00001470	1.195	-0.486	0.709	-0.798	0.396	up		up	down
Q18012	bbln-1	Bulges Budding from the intestinal LumeN	WBGene00015791	0.488	0.121	0.608	-0.319	0.168	up		up
Q22460	bca-1	Beta carbonic anhydrase 1	WBGene00000245	-0.588	0.688	0.1	0.187	-0.401	down	up			down
D3NQA9	bca-2	Carbonic anhydrase	WBGene00013805	0.13	0.164	0.295	-0.143	-0.013			up
P54688	bcat-1	Branched-chain-amino-acid aminotransferase, cytosolic	WBGene00001149	-0.249	0.18	-0.068	-0.557	-0.805				down	down
O45924	bckd-1A	2-oxoisovalerate dehydrogenase subunit alpha, mitochondrial	WBGene00012713	0.074	0.343	0.417	-0.061	0.013		up	up
Q93619	bckd-1b	Transket_pyr domain-containing protein	WBGene00006518	0.035	0.473	0.508	-0.052	-0.016		up	up
Q9TXT9	bcmo-2	Beta-Carotene 15,15'-MonoOxygenase	WBGene00018755	0.015	0.145	0.16	-0.266	-0.251				down	down
Q20755	bcs-1	Mitochondrial chaperone BCS1	WBGene00010042	-0.188	1.115	0.927	0.686	0.497		up
Q965N3	BE0003N10.1	Polyribonucleotide nucleotidyltransferase	WBGene00015266	0.256	0.238	0.493	-0.042	0.214	up	up	up		up
Q18817	ben-1	Tubulin beta chain	WBGene00000248	-0.174	-0.081	-0.255	-0.019	-0.193	down		down		down
O45435	best-13	Bestrophin homolog 13	WBGene00009323	0.577	0.005	0.583	-0.042	0.535	up		up		up
Q19978	best-14	Bestrophin homolog 14	WBGene00009340	-0.155	0.062	-0.093	0.135	-0.02
Q21973	best-15	Bestrophin homolog 15	WBGene00011258	0.221	-1.503	-1.282	-0.632	-0.411		down	down
Q23369	best-22	Bestrophin homolog 22	WBGene00013921	-0.322	-0.099	-0.421	0.063	-0.259			down
P34672	best-24	Bestrophin homolog 24	WBGene00022797	-0.14	0.317	0.177	-0.113	-0.253
O17206	best-3	Bestrophin homolog	WBGene00015286	1.106	-0.693	0.412	-0.74	0.366	up
Q95Y80	bet-1	Bromodomain-containing protein bet-1	WBGene00022473	0.068	-0.047	0.021	0.058	0.126
Q27526	bgal-1	Beta-galactosidase	WBGene00011832	-0.137	0.08	-0.057	-0.008	-0.145
V6CJ04	bicd-1	Protein bicaudal D homolog	WBGene00016611	0.158	-0.019	0.139	-0.006	0.152	up		up		up
O17860	bigr-1	Uncharacterized protein	WBGene00009512	0.068	0.185	0.253	0.033	0.1
Q09457	bli-1	Cuticle collagen bli-1	WBGene00000251	-0.674	0.346	-0.328	0.663	-0.011	down			up
O61213	bli-3	Dual oxidase 1	WBGene00000253	-0.184	0.047	-0.137	0.059	-0.125	down
P51559	bli-4	Endoprotease bli-4	WBGene00000254	0.513	-0.28	0.233	-0.25	0.263	up	down	up		up
Q22616	blos-1	Biogenesis of lysosome-related organelles complex 1 subunit 1	WBGene00011872	0.024	-0.273	-0.249	-0.262	-0.238
Q95XD3	blos-2	Biogenesis of lysosome-related organelles complex 1 subunit 2	WBGene00022251	-0.069	0.084	0.015	-0.036	-0.104
Q8IG33	bmy-1	Boca/MESD chaperone for YWTD beta-propeller-EGF	WBGene00017293	-0.043	-0.237	-0.28	-0.169	-0.213
Q9BI98	bpl-1	BPL/LPL catalytic domain-containing protein	WBGene00000259	-0.271	0.149	-0.122	-0.132	-0.403					down
Q23493	bpnt-1	3'(2'), 5'-BisPhosphate NucleoTidase 1 homolog	WBGene00044063	-0.27	0.145	-0.125	-0.02	-0.29	down				down
Q95QN6	brap-2	BRCA1-associated protein homolog 2	WBGene00017144	0.032	-0.072	-0.04	-0.144	-0.111
Q18801	bre-1	GDP-mannose 4,6 dehydratase 1	WBGene00000266	-0.358	-0.001	-0.359	0.011	-0.347	down		down		down
Q9U1S2	brp-1	Bypass of Response to Pheromone in yeast	WBGene00000273	0.196	0.277	0.473	0.134	0.33			up
Q9XWH8	btb-14	BTB/POZ domain-containing protein Y57A10B.3	WBGene00013275	-0.39	0.377	-0.013	0.396	0.006	down	up
Q9XWH0	bub-3	Mitotic checkpoint protein bub-3	WBGene00013209	0.21	-0.261	-0.051	-0.078	0.132
Q20932	byn-1	Uncharacterized protein byn-1	WBGene00000276	1.576	0.013	1.589	0.117	1.692	up		up		up
Q9XVT7	C01A2.2	Uncharacterized protein	WBGene00007214	0.441	0.161	0.602	-0.073	0.368	up		up		up
O02208	C01A2.4	Uncharacterized protein	WBGene00007216	0.282	-0.204	0.078	-0.053	0.229	up
Q3Y3Z9	C01B10.11	Uncharacterized protein	WBGene00044294	-0.554	-0.116	-0.67	0.012	-0.541	down		down		down
Q17543	C01B10.3	Uncharacterized protein	WBGene00015278	0.132	0.068	0.2	0.03	0.162			up
H2KYC9	C01B10.6	EGF-like domain-containing protein	WBGene00015280	-1.316	-0.146	-1.463	-0.633	-1.949	down		down		down
Q17539	C01B10.8	Methyltranfer_dom domain-containing protein	WBGene00015282	1.625	0.022	1.648	-0.046	1.579	up		up		up
Q17540	C01B10.9	Bis(5'-adenosyl)-triphosphatase	WBGene00015283	-0.079	0.243	0.163	0.141	0.061
G5ECR6	C01B4.6	Aldose 1-epimerase	WBGene00015270;WBGene00044734	0.216	-0.035	0.181	0.016	0.232	up		up		up
A5Z2X0	C01B9.1	Uncharacterized protein	WBGene00007220	-0.631	0.355	-0.276	0.346	-0.286	down
Q11086	C01C10.2	Uncharacterized protein C01C10.2	WBGene00015294	-0.383	0.248	-0.135	0.412	0.029	down	up		up
Q93167	C01G10.7	HpcH_HpaI domain-containing protein	WBGene00007234	-0.043	0.388	0.345	-0.023	-0.067		up	up
Q93169	C01G10.9	Methylthioribose-1-phosphate isomerase	WBGene00007236	-0.294	0.146	-0.148	0.076	-0.218	down				down
Q17568	C01G5.5	Aldo_ket_red domain-containing protein	WBGene00015307	-0.194	0.168	-0.026	0.001	-0.193
Q17573	C01G6.4	RING-type domain-containing protein	WBGene00007226	-0.37	0.258	-0.111	0.342	-0.027
Q17585	C01H6.4	Flavin-containing monooxygenase	WBGene00007254	-0.361	0.184	-0.178	0.044	-0.318	down	up	down		down
A5JYT3	C01H6.8	Uncharacterized protein	WBGene00007257	-0.201	0.697	0.496	0.413	0.212
O44443	C02B10.3	EGF-like domain-containing protein C02B10.3	WBGene00015328	-0.096	0.014	-0.082	-0.011	-0.106
O44444	C02B10.4	RRM domain-containing protein	WBGene00015329	-0.609	0.088	-0.52	0.068	-0.541
D7SFI3	C02D5.4	Glutathione S-transferase omega	WBGene00043097	0.05	-0.288	-0.238	-0.123	-0.073		down	down
Q11101	C02F12.5	BPTI/Kunitz inhibitor domain-containing protein C02F12.5	WBGene00015355	-1.422	-0.07	-1.492	0.532	-0.889	down		down		down
P34280	C02F5.3	Uncharacterized GTP-binding protein C02F5.3	WBGene00015346	0.599	0.052	0.651	-0.002	0.597	up		up		up
Q17598	C03A3.2	Transmembrane protein 104 homolog	WBGene00007267	-0.358	-0.133	-0.491	0.27	-0.088			down
Q95QY5	C03B1.14	Uncharacterized protein	WBGene00015382	-0.223	0.131	-0.092	0.136	-0.087
O01460	C03G6.17	DUF1248 domain-containing protein	WBGene00015402	-0.569	0.009	-0.56	0.114	-0.455	down		down		down
O01454	C03G6.5	UPF0376 protein C03G6.5	WBGene00015393	-2.034	0.068	-1.966	0.503	-1.531	down		down	up	down
O16657	C03H5.3	Uncharacterized protein	WBGene00015405	2.15	0.068	2.218	0.23	2.38	up		up		up
Q17625	C04C11.1	SCP domain-containing protein	WBGene00007295	-0.072	-0.394	-0.466	-0.12	-0.192
O76679	C04E12.2	DUF19 domain-containing protein	WBGene00015433	0.936	0.465	1.401	0.715	1.651	up		up		up
O76677	C04E12.4	Uncharacterized protein	WBGene00015434	-0.023	0.457	0.434	0.171	0.149		up	up
A0A131MBK3	C04E12.5	Uncharacterized protein	WBGene00015435	0.046	-0.071	-0.024	-0.108	-0.062
O01470	C04E6.11	Uncharacterized protein	WBGene00015425	1.483	0.52	2.003	-0.213	1.27	up		up		up
O01464	C04E6.7	Uncharacterized protein	WBGene00015423	-0.582	-1.032	-1.613	-0.419	-1.001		down	down		down
Q9XVF1	C04F12.1	Piwi domain-containing protein	WBGene00007297	0.399	-0.837	-0.439	-0.543	-0.145	up	down	down	down
Q17636	C04G6.4	Uncharacterized protein	WBGene00015454	0.177	0.022	0.199	0.031	0.207
O45241	C04H5.1	Multifunctional methyltransferase subunit TRM112-like protein	WBGene00007312	1.065	0.081	1.146	0.213	1.278	up		up		up
Q09450	C05C10.3	Probable succinyl-CoA:3-ketoacid coenzyme A transferase, mitochondrial	WBGene00007330	0.139	0.437	0.576	0.029	0.168		up	up
O16314	C05C8.1	ATP synthase subunit s, mitochondrial	WBGene00015460	0.034	0.037	0.071	-0.247	-0.213				down	down
O16315	C05C8.7	Mannose-6-phosphate isomerase	WBGene00015464	-0.527	0.057	-0.47	-0.021	-0.548	down		down		down
P48053	C05D11.1	Uncharacterized protein C05D11.1	WBGene00015481	0.201	0.107	0.307	-0.002	0.199	up		up		up
Q11185	C05D11.5	Putative hydroxypyruvate isomerase	WBGene00015483	-0.115	0.344	0.23	-0.022	-0.137		up
Q17657	C05D12.2	Uncharacterized protein	WBGene00007340	-0.487	-0.081	-0.568	0.295	-0.192	down		down	up
Q6A4V9	C05D12.3	EGF-like domain-containing protein	WBGene00014666	-1.119	1.243	0.124	-0.06	-1.179	down	up			down
O45136	C05D2.8	Uncharacterized protein	WBGene00015469	-0.171	0.18	0.009	-0.152	-0.323
Q9GYK2	C05D9.3	Uncharacterized integrin beta-like protein C05D9.3	WBGene00015472	0.019	-0.142	-0.123	0.139	0.158					up
H2KYG6	C05D9.9	Uncharacterized protein	WBGene00015476	-0.068	-0.424	-0.492	0.062	-0.006		down	down
Q17676	C05G5.2	Uncharacterized protein	WBGene00007348	-0.271	-0.157	-0.427	-0.507	-0.778					down
Q5WRS4	C06A6.4	N-acyl-aliphatic-L-amino acid amidohydrolase	WBGene00015509	-0.694	0.328	-0.365	0.348	-0.346	down	up	down	up	down
Q17705	C06B3.6	Uncharacterized protein	WBGene00007365	0.263	0.444	0.707	0.385	0.649			up		up
Q17717	C06C3.4	Uncharacterized protein	WBGene00007375	-0.322	0.344	0.022	-0.119	-0.441
P34304	C06E1.9	Uncharacterized protein C06E1.9	WBGene00015524	-0.137	-0.049	-0.185	0.112	-0.025
Q17726	C06E4.3	Uncharacterized protein	WBGene00015532	2.553	-1.871	0.682	0.612	3.165	up	down			up
Q17724	C06E4.6	Uncharacterized protein	WBGene00015535	2.024	-0.966	1.057	0.834	2.858	up				up
Q17731	C06E7.2	Uncharacterized protein	WBGene00015539	0.229	-0.33	-0.101	-1.201	-0.971
Q17764	C06H2.2	START domain-containing protein	WBGene00007386	0.676	0.093	0.768	-0.225	0.45	up		up		up
G5EDA7	C06H5.6	MFS domain-containing protein	WBGene00007394	-0.195	0.38	0.184	0.238	0.043	down	up	up
Q95QX5	C07A12.7	GAT domain-containing protein	WBGene00015561	-0.471	-0.178	-0.648	0.12	-0.35	down	down	down		down
Q17780	C07D10.5	Uncharacterized protein	WBGene00015569	-0.4	-0.015	-0.414	0.074	-0.326	down		down		down
P91020	C07D8.6	Aldo_ket_red domain-containing protein	WBGene00015565	-0.169	0.449	0.281	0.168	0	down	up	up
Q95YE7	C07H6.2	Uncharacterized protein	WBGene00015579	0.133	-0.064	0.069	-0.242	-0.11
Q09227	C08B11.9	Uncharacterized protein C08B11.9	WBGene00007436	-0.297	0.074	-0.223	0.229	-0.068
Q17815	C08B6.3	Glycosyltransferase family 92 protein	WBGene00007424	-0.251	-0.071	-0.322	0.009	-0.242			down
Q17819	C08B6.8	Probable oligoribonuclease	WBGene00007429	0.383	-0.11	0.273	-0.048	0.335	up		up		up
G5EFJ3	C08E8.4	NADAR domain-containing protein	WBGene00007440	-1.122	-0.453	-1.576	0.036	-1.086	down	down	down		down
Q17828	C08F8.2	ATP-dependent RNA helicase SUV3 homolog, mitochondrial	WBGene00007444	0.308	0.187	0.495	-0.048	0.26	up		up		up
Q7YX96	C08F8.9	Uncharacterized protein	WBGene00007449	0.121	0.548	0.668	0.044	0.165		up	up
H2KYM8	C09E8.1	Uncharacterized protein	WBGene00015644	-0.337	0.18	-0.157	0.313	-0.024
Q17871	C09G9.1	Uncharacterized protein	WBGene00007492	-0.231	-0.111	-0.343	-0.194	-0.425	down		down		down
O16319	C10B5.3	Uncharacterized protein	WBGene00015671	-0.341	0.022	-0.319	0.186	-0.155
Q17898	C10C5.3	N-acyl-aliphatic-L-amino acid amidohydrolase	WBGene00007507	0.041	-0.016	0.026	0.381	0.423					up
Q17899	C10C5.4	N-acyl-aliphatic-L-amino acid amidohydrolase	WBGene00007508	-0.008	-0.199	-0.207	0.229	0.221
O45069	C11D2.4	Queuosine salvage protein	WBGene00015702	0.077	0.128	0.205	0.076	0.153			up
Q8MXH7	C11D2.7	PUA domain-containing protein	WBGene00015703	-0.01	0.095	0.085	0.092	0.082
Q5WRP2	C11H1.9	CRAL-TRIO domain-containing protein	WBGene00023500	-0.348	0.304	-0.043	0.095	-0.253
H2KYQ3	C12D12.1	Uncharacterized protein	WBGene00015713	-0.088	-0.212	-0.3	-0.304	-0.392			down	down	down
Q17930	C12D5.9	Uncharacterized protein	WBGene00015710	1.22	-0.918	0.301	-0.973	0.247	up
A0A486WXC8	C13B4.1	Cytochrome b561 domain-containing protein	WBGene00007545	0.059	0.231	0.29	0.007	0.066
O01486	C13F10.5	SAYSvFN domain-containing protein	WBGene00015744	-0.036	-0.385	-0.421	-0.305	-0.341			down
Q17962	C14B1.3	Uncharacterized protein	WBGene00007574	-0.17	-0.039	-0.209	-0.207	-0.377					down
Q8MNV8	C14B9.10	Complex III subunit 9	WBGene00015755	0.02	-0.407	-0.387	0.336	0.356		down	down	up	up
P34329	C14B9.2	Probable protein disulfide-isomerase A4	WBGene00015752	-0.082	0.287	0.204	0.074	-0.009		up	up
P34335	C14B9.8	Probable phosphorylase b kinase regulatory subunit alpha	WBGene00015754	-0.3	-0.164	-0.465	0.079	-0.221	down	down	down		down
Q17971	C14C10.5	Uncharacterized protein	WBGene00007588	-0.202	-0.077	-0.28	0.085	-0.117	down		down		down
B3WFT8	C14F11.4	Uncharacterized protein	WBGene00015780	-0.527	0.178	-0.348	-0.139	-0.665	down		down		down
B1Q254	C14H10.3	Uncharacterized protein	WBGene00007593	-0.067	-0.165	-0.232	-0.091	-0.158		down	down		down
Q18005	C15B12.4	Uncharacterized protein	WBGene00015786	-0.398	-0.664	-1.062	-0.295	-0.693			down
Q18014	C15C7.7	GDP-fucose protein O-fucosyltransferase 1	WBGene00015793	0	0.158	0.158	-0.199	-0.199
A0A2C9C2Z6	C15F1.1	ShKT domain-containing protein	WBGene00015794	0.056	-0.003	0.053	0.169	0.225
Q18025	C15H9.4	Uncharacterized protein	WBGene00015800	-0.072	-0.551	-0.623	-0.016	-0.088		down	down
Q18032	C15H9.9	Uncharacterized protein	WBGene00015803	0.394	-0.391	0.003	-0.364	0.03
Q18036	C16A3.5	NADH dehydrogenase [ubiquinone] 1 beta subcomplex subunit 9	WBGene00015810	0.122	-0.644	-0.522	0.148	0.27		down	down		up
Q18035	C16A3.6	Protein MAK16 homolog	WBGene00015811	1.751	-0.237	1.514	0.243	1.994	up		up		up
Q09461	C16C10.1	Uncharacterized mitochondrial carrier C16C10.1	WBGene00007622	0.111	0.136	0.246	-0.038	0.073			up
Q09462	C16C10.2	Probable U3 small nucleolar RNA-associated protein 11	WBGene00007623	1.416	-0.176	1.24	0.117	1.534	up		up		up
Q09464	C16C10.8	Uncharacterized protein C16C10.8	WBGene00007628	3.804	-0.092	3.712	0.4	4.204	up		up		up
A0A2K5ATM8	C16C2.4	BSD domain-containing protein	WBGene00007621	-0.125	-0.192	-0.316	-0.162	-0.287
Q22902	C16D9.1	Uncharacterized protein	WBGene00015857	0.362	-0.079	0.283	0.167	0.529					up
Q22898	C16D9.4	Uncharacterized protein	WBGene00015859	0.079	-0.025	0.054	-0.116	-0.037
O16536;Q22213;Q9TXY2	C17A2.2	Glycosyltransferase family 92 protein	WBGene00015870	-0.684	-0.096	-0.78	0.099	-0.585
O45155	C17B7.5	Uncharacterized protein	WBGene00015879	-0.222	-0.217	-0.439	-0.186	-0.408
Q9BIA9	C17C3.1	Uncharacterized protein	WBGene00015887	0.037	-0.231	-0.194	0.003	0.04		down	down
Q9BKP8	C17F4.7	Uncharacterized protein	WBGene00015913	-1.353	1.688	0.336	0.61	-0.743		up
Q93240	C17G1.2	Uncharacterized protein	WBGene00007649	0.897	-2.005	-1.107	-0.89	0.007		down	down
Q09973	C17G10.1	uS12 prolyl 3-hydroxylase	WBGene00015915	1.086	-0.071	1.016	0.075	1.162	up		up		up
H2KYU5	C17G10.6	ShKT domain-containing protein	WBGene00015918	0.09	-0.388	-0.298	-0.361	-0.271
O45082	C17H12.11	Uncharacterized protein	WBGene00015936	0.794	-1.218	-0.424	-0.557	0.237	up	down	down	down
O45086	C17H12.2	Uncharacterized protein	WBGene00015928	0.053	0.054	0.107	-0.149	-0.097
O45078	C17H12.8	CUB_2 domain-containing protein	WBGene00015933	-0.053	-0.424	-0.476	0.144	0.091			down
Q18070	C18A11.1	Uncharacterized protein	WBGene00015947	-0.043	-0.119	-0.162	0.019	-0.024
Q09958	C18A3.3	Probable rRNA-processing protein EBP2 homolog	WBGene00015941	1.925	-0.116	1.809	0.031	1.956	up		up		up
G5EEW1	C18B12.6	Uncharacterized protein	WBGene00007668	0.283	-0.126	0.157	-0.218	0.065	up
Q18074	C18B2.3	Uncharacterized protein	WBGene00015954	0.284	0.013	0.297	0.063	0.347	up		up		up
Q18075	C18B2.4	GRAM domain-containing protein	WBGene00015955	-0.44	0.015	-0.425	0.214	-0.226
H2KYV3	C18B2.5	Uncharacterized protein	WBGene00015956	0.189	0.047	0.236	-0.065	0.125	up		up
A0A2C9C3A0	C18C4.7	Uncharacterized protein	WBGene00015968	-0.189	-0.038	-0.227	-0.084	-0.273	down		down		down
Q9XTZ4	C18D11.1	Uncharacterized protein	WBGene00007679	0.277	0.019	0.296	-0.125	0.151
Q9XTZ3	C18D11.3	Uncharacterized protein	WBGene00007681	1.125	-0.021	1.105	0.233	1.358	up		up		up
Q18093	C18E9.2	Translocation protein SEC62	WBGene00007683	-0.142	-0.028	-0.17	0.314	0.172
Q18095	C18E9.4	NADH dehydrogenase [ubiquinone] 1 beta subcomplex subunit 3	WBGene00007684	0.113	-0.695	-0.581	0.167	0.28		down	down		up
Q18091	C18E9.5	Uncharacterized protein	WBGene00007685	0.204	-0.059	0.145	-0.16	0.044
Q18099	C18F10.7	ANK_REP_REGION domain-containing protein	WBGene00015978	-0.206	-0.21	-0.416	0.159	-0.047			down
Q4R118	C18H7.11	Uncharacterized protein	WBGene00044457	-0.708	-0.316	-1.024	0.018	-0.691	down		down		down
Q09238	C18H9.6	Uncharacterized protein C18H9.6	WBGene00016004	-1.581	0.871	-0.71	-0.584	-2.165	down				down
Q10121	C23G10.2	RutC family protein C23G10.2	WBGene00016011	-0.548	-0.029	-0.577	-0.011	-0.559	down		down		down
H2KYX4	C23H3.2	Uncharacterized protein	WBGene00016018	-0.05	0.189	0.139	0.266	0.216				up	up
H2KYX9	C23H5.8	Uncharacterized protein	WBGene00016027	-1.12	0.652	-0.468	-0.23	-1.35	down				down
H2KYZ3	C24A3.2	Uncharacterized protein	WBGene00016033	-0.544	-0.45	-0.994	0.431	-0.113
Q18122	C24A3.4	Uncharacterized protein	WBGene00016034	-0.301	0.185	-0.117	0.16	-0.141	down
Q3Y402	C24B5.4	DUF1907 domain-containing protein	WBGene00016046	-0.289	0.019	-0.27	-0.012	-0.301	down		down		down
O76430	C24B9.3	Uncharacterized protein	WBGene00016048	-0.165	0.629	0.464	-0.645	-0.81
O44133	C24D10.6	CHCH domain-containing protein	WBGene00016057	0.494	-1.111	-0.617	0.132	0.627	up	down	down		up
O76387	C24G6.8	Probable peptidyl-tRNA hydrolase 2	WBGene00016062	-0.262	0.109	-0.154	0.17	-0.092
O17157	C24H12.4	RNA helicase	WBGene00016073	1.907	-0.193	1.715	0.083	1.99	up		up		up
E2JL03	C25A1.20	Uncharacterized protein	WBGene00303030	-0.14	0.232	0.092	0.218	0.078
Q18161	C25E10.12	UPF0046 protein C25E10.12	WBGene00016101	0.055	-0.175	-0.12	-0.436	-0.381
A0A2K5ATR5	C25H3.11	Ricin B-type lectin domain-containing protein	WBGene00016120	0.09	-0.052	0.038	-0.274	-0.184
Q8IG45	C25H3.14	4HBT domain-containing protein	WBGene00016123	-0.073	0.498	0.425	0.117	0.043		up	up
Q18187	C25H3.3	4HBT domain-containing protein	WBGene00016112	0.059	0.541	0.6	0.238	0.297		up	up		up
Q8MQC1	C25H3.7	Uncharacterized protein	WBGene00016116	-0.025	0.264	0.239	-0.058	-0.083		up	up
H2KYV1	C25H3.9	NADH dehydrogenase [ubiquinone] 1 beta subcomplex subunit 5, mitochondrial	WBGene00016118	0.087	-0.634	-0.548	0.147	0.234		down	down
Q18196	C26B2.7	Uncharacterized protein	WBGene00016129	0.071	0.072	0.143	-0.02	0.051
Q18202	C26B9.1	Uncharacterized protein	WBGene00016131	0.312	0.499	0.811	0.11	0.422		up	up
Q18200	C26B9.3	Uncharacterized protein	WBGene00016133	-0.211	-0.295	-0.506	-0.107	-0.318
Q18198	C26B9.5	Uncharacterized protein	WBGene00016134	-0.302	0.11	-0.192	0.097	-0.205	down
Q7YX71	C26C6.9	GOLD domain-containing protein	WBGene00007743	-0.015	0.035	0.02	-0.143	-0.157
Q18232	C26F1.3	Uncharacterized protein C26F1.3	WBGene00016148	2.703	-0.238	2.465	-0.016	2.687	up		up		up
P90754	C27A7.1	Ectonucleotide pyrophosphatase/phosphodiesterase C27A7.1	WBGene00007753	-0.185	-0.002	-0.187	0.07	-0.115
Q9U3P0	C27A7.5	Asparaginase	WBGene00007756	-0.014	-0.018	-0.032	-0.017	-0.031
H9G2Z4	C27A7.6	Uncharacterized protein	WBGene00007757	-0.347	-0.229	-0.576	0.047	-0.3			down
Q18242	C27B7.2	Uncharacterized protein	WBGene00007760	0.072	0.292	0.363	0.038	0.109			up
Q7YTR9	C27B7.9	Uncharacterized protein	WBGene00007765	0.521	-0.337	0.184	-0.537	-0.015
Q93291	C27D8.4	Epimerase domain-containing protein	WBGene00007780	-0.524	0.033	-0.491	0.343	-0.18	down		down
Q95QU0	C27F2.10	PCI domain-containing protein 2 homolog	WBGene00016171	-0.047	-0.068	-0.115	0.061	0.014
Q18257	C27F2.4	Uncharacterized protein	WBGene00016166	2.151	-0.082	2.069	0.013	2.164	up		up		up
Q95QU1	C27F2.9	JmjC domain-containing protein	WBGene00043156	0.764	-0.128	0.636	-0.138	0.626	up		up		up
H2KZ24	C27H5.2	TDP43_N domain-containing protein	WBGene00016172	-0.335	-0.309	-0.645	0.028	-0.308	down	down	down		down
O17606	C27H6.8	MYG1 protein C27H6.8	WBGene00007787	0.379	0.038	0.418	0.02	0.4	up		up		up
A9QY30	C27H6.9	PDDEXK_1 domain-containing protein	WBGene00077500	0.396	0.127	0.524	-0.188	0.209
Q18280	C28C12.4	DUF148 domain-containing protein	WBGene00016180	0.314	-0.712	-0.398	-0.465	-0.151		down
Q8MQB4	C28G1.6	RING-type domain-containing protein	WBGene00016191	-0.087	0.067	-0.02	0.059	-0.028
Q09475	C28H8.3	Uncharacterized helicase C28H8.3	WBGene00016194	0.198	0.032	0.23	0.104	0.302	up		up		up
Q95QT2	C29E4.10	Putative galactocerebrosidase	WBGene00016207	0.171	-0.375	-0.204	-0.082	0.089
Q8MNU8	C29E4.12	Protein FMC1 homolog	WBGene00016209	-0.257	-0.029	-0.286	0.15	-0.107
O17616	C29F3.7	CUB_2 domain-containing protein	WBGene00007807	-1.146	0.686	-0.46	0.215	-0.93	down	up	down		down
Q18310	C29F5.1	Uncharacterized protein	WBGene00016210	0.092	-0.132	-0.04	-0.168	-0.076
O17620	C29F7.1	CHK domain-containing protein	WBGene00007810	-0.238	-0.027	-0.265	-0.003	-0.241
O17621	C29F7.2	CHK domain-containing protein	WBGene00007811	-0.314	0.239	-0.075	-0.103	-0.417	down	up			down
O17622	C29F7.3	UMP-CMP kinase 1	WBGene00007812	-0.135	-0.006	-0.142	0.094	-0.041
O16887	C29G2.6	Uncharacterized protein C29G2.6	WBGene00016234	0.357	0.384	0.741	0.515	0.871			up	up	up
Q18315	C29H12.2	TPT domain-containing protein	WBGene00016235	0.202	-0.484	-0.282	-0.083	0.12		down	down
Q95YE1	C30F12.2	Uncharacterized protein	WBGene00016261	0.082	0.201	0.283	-0.108	-0.027			up
H2KZ48	C30F12.5	Uncharacterized protein	WBGene00016264	0.017	0.109	0.126	-0.029	-0.011
Q09486	C30G12.2	Uncharacterized protein	WBGene00016274	-0.455	-0.27	-0.725	0.192	-0.263	down		down
Q9XVR3	C30H6.8	Thioredoxin domain-containing protein	WBGene00007825	-0.068	0.365	0.297	-0.042	-0.111
Q9XVR5	C30H6.9	Uncharacterized protein	WBGene00007826	0.055	-0.094	-0.039	-0.028	0.028
O17626	C31C9.2	Uncharacterized protein	WBGene00007836	-0.481	-0.007	-0.488	0.137	-0.345	down		down		down
Q18347	C31H2.4	Putative protein C31H2.4	WBGene00016294	-0.859	0.937	0.079	-0.378	-1.236	down	up			down
O62082	C31H5.4	Uncharacterized protein	WBGene00007855	-0.534	0.072	-0.462	-1.127	-1.662				down	down
B3WFZ3	C31H5.6	Uncharacterized protein	WBGene00007857	-0.028	-0.38	-0.408	-0.182	-0.21		down	down
Q65ZJ7	C32D5.8	Thioredoxin domain-containing protein	WBGene00016316	0.274	-0.075	0.199	0.065	0.339	up				up
P91130	C32E8.9	Uncharacterized protein	WBGene00016325	-0.014	0.175	0.161	-0.348	-0.362				down	down
O01685	C32F10.8	Alanine transaminase	WBGene00016333	-0.083	0.126	0.043	0.06	-0.023		up
Q9XUH7	C32H11.4	CUB_2 domain-containing protein	WBGene00007867	0.933	1.07	2.004	0.1	1.033	up	up	up		up
Q18359	C33A12.1	Probable NADH dehydrogenase [ubiquinone] 1 alpha subcomplex subunit 5	WBGene00007880	0.121	-0.459	-0.338	0.123	0.244		down	down		up
Q18357	C33A12.3	Uncharacterized protein	WBGene00007882	0.063	-0.276	-0.213	0.044	0.107		down
Q5DX36	C33F10.14	Semialdhyde_dh domain-containing protein	WBGene00050941	-0.111	0.152	0.041	0.049	-0.061
Q18399	C33G8.4	Uncharacterized protein	WBGene00016362	-0.09	0.108	0.018	0.071	-0.02
O44955	C34B2.8	NADH dehydrogenase [ubiquinone] 1 alpha subcomplex subunit 13	WBGene00016393	0.183	-0.805	-0.621	0.077	0.26		down	down		up
Q09270	C34C12.6	CRAL-TRIO domain-containing protein C34C12.6	WBGene00007925	-0.384	0.356	-0.027	0.231	-0.152
Q18421	C34C12.8	GrpE protein homolog, mitochondrial	WBGene00007927	0.593	1.114	1.707	-0.239	0.354	up	up	up	down	up
Q18449	C34D4.4	Uncharacterized Golgi apparatus membrane protein-like protein C34D4.4	WBGene00016400	0.093	-0.17	-0.077	-0.254	-0.162
G5ECE7	C34E7.4	Uncharacterized protein	WBGene00007934	0.143	0.167	0.31	0.124	0.267			up		up
A0A486WVV5	C34F6.10	Uncharacterized protein	WBGene00007944	-0.154	-0.122	-0.276	0.001	-0.153			down
O45144	C34H4.1	Uncharacterized protein	WBGene00016424	-0.419	-0.475	-0.894	0.398	-0.021		down	down
O45143	C34H4.2	Uncharacterized protein	WBGene00016425	-0.586	-0.359	-0.945	0.192	-0.394	down		down
Q18474	C35A5.6	Uncharacterized protein C35A5.6	WBGene00007950	-0.361	0.116	-0.245	0.121	-0.24	down
Q18476	C35A5.8	Uncharacterized protein	WBGene00007952	-0.094	0.016	-0.078	0.147	0.053
O45060	C35B1.5	Thioredoxin domain-containing protein	WBGene00016435	-0.389	0.199	-0.19	-0.031	-0.42	down	up	down		down
Q8WQG1	C35D10.1	ER membrane protein complex subunit 7 homolog	WBGene00016439	-0.017	-0.025	-0.042	-0.151	-0.168
Q18484	C35D10.10	Thioredoxin-related transmembrane protein 2 homolog	WBGene00016446	-0.75	0.069	-0.681	0.266	-0.484	down
Q18485	C35D10.5	Ubiq_cyt_C_chap domain-containing protein	WBGene00016442	-0.037	0.346	0.309	-0.156	-0.193		up	up
Q18483	C35D10.6	Aldo_ket_red domain-containing protein	WBGene00016443	0.016	0.095	0.111	-0.016	0
Q18493	C36A4.4	Probable UDP-N-acetylglucosamine pyrophosphorylase	WBGene00007965	-0.029	-0.328	-0.357	-0.286	-0.315		down	down	down	down
Q93340	C36B1.6	Uncharacterized protein	WBGene00007973	-0.15	-0.612	-0.762	0.059	-0.092		down	down
Q966P8	C36B7.6	Uncharacterized protein	WBGene00016469	-0.007	-0.245	-0.252	-0.039	-0.046			down
O16405	C36C5.5	DUF19 domain-containing protein	WBGene00016474	0.1	0.23	0.33	0.072	0.172			up
O01504	C37A2.7	60S acidic ribosomal protein P2	WBGene00016493	0.079	0.168	0.247	0.304	0.383					up
D3YT89	C37A5.3	Uncharacterized protein	WBGene00014698	0.274	-0.217	0.057	-0.372	-0.098	up			down
G8JZP2;G8JZP3;O62093	C37A5.5	Uncharacterized protein;Uncharacterized protein;FIP (Fungus-Induced Protein) Related	WBGene00014699	0.484	-1.105	-0.622	-0.412	0.072		down
Q22918	C37C3.2	Eukaryotic translation initiation factor 5	WBGene00016496	0.187	-0.005	0.182	0.049	0.237	up		up		up
Q95Q68	C37H5.13	Uncharacterized protein	WBGene00016511	-0.23	-0.048	-0.278	-0.055	-0.285			down		down
P91136	C37H5.5	Nucleolar complex protein 3 homolog	WBGene00016508	1.319	-0.071	1.248	-0.065	1.254	up		up		up
Q03567	C38C10.2	Uncharacterized transporter slc-17.2	WBGene00008000	-0.031	0.025	-0.006	-0.015	-0.046
Q18515	C38H2.2	Glycoprotein-N-acetylgalactosamine 3-beta-galactosyltransferase 1	WBGene00008019	-0.018	-0.493	-0.511	0.03	0.012		down	down
C2BR91	C39B5.5	Cystatin	WBGene00016523	0.072	0.319	0.392	0.355	0.427		up	up	up	up
Q9N5X5	C39B5.6	Glutamyl-tRNA(Gln) amidotransferase subunit B, mitochondrial	WBGene00016524	-0.251	0.497	0.246	-0.116	-0.367
A0A1X7RBQ0	C39D10.11	Uncharacterized protein	WBGene00043983	0.313	-0.295	0.019	-0.366	-0.053
Q18529	C39D10.7	Uncharacterized protein	WBGene00016534	0.343	-2.935	-2.593	-1.048	-0.706		down	down
Q95QR7	C39D10.8	DUF4440 domain-containing protein	WBGene00016535	-0.772	0.194	-0.578	0.499	-0.273	down	up	down	up	down
Q18541	C39E9.8	Uncharacterized protein	WBGene00008032	0.273	-0.356	-0.083	-0.088	0.185
Q18550	C39H7.4	Uncharacterized protein	WBGene00016542	-0.145	-0.187	-0.332	0.166	0.021			down
G4RZ47	C41D11.10	Uncharacterized protein	WBGene00195180	-2.002	-0.611	-2.613	-0.57	-2.572	down		down		down
Q3Y403	C41G11.1	Metallophos domain-containing protein	WBGene00016568	-0.253	-0.174	-0.427	0.404	0.151
A3QMC3	C42C1.12	Uncharacterized protein	WBGene00016590	0.127	0.348	0.474	0.018	0.144
Q18577	C42D4.1	DUF148 domain-containing protein	WBGene00016594	0.223	-0.529	-0.307	0.118	0.34		down	down		up
U4PAW9	C42D4.19	Uncharacterized protein	WBGene00235295	-0.535	0.282	-0.253	0.519	-0.016
P91154	C43E11.9	60S ribosome subunit biogenesis protein NIP7 homolog	WBGene00016607	2.274	-0.035	2.239	-0.043	2.231	up		up		up
Q18600	C44B7.11	Putative endoplasmic reticulum metallopeptidase 1-B	WBGene00016631	-0.403	0.48	0.077	-0.035	-0.438	down	up			down
Q18594	C44B7.5	Uncharacterized protein C44B7.5	WBGene00016627	-0.004	-3.361	-3.365	-0.824	-0.828		down	down
Q18596	C44B7.7	Gamma-glutamylcyclotransferase	WBGene00016629	-0.214	0.192	-0.021	0.015	-0.199	down	up			down
Q18611	C44C1.1	Uncharacterized protein	WBGene00016641	0.257	-0.908	-0.651	-0.63	-0.373		down	down	down
A4UVK2	C44C10.9	Uncharacterized protein	WBGene00008089	0.05	-0.019	0.031	-0.049	0.002
Q18621	C44E12.1	M20_dimer domain-containing protein	WBGene00016657	-0.457	-0.148	-0.604	0.038	-0.419	down		down		down
A6PVA1	C44E4.5	NudC domain-containing protein 1	WBGene00016654	0.201	0.128	0.329	-0.093	0.108	up		up
G5EE16	C44H4.4	Chorein_N domain-containing protein	WBGene00008094	-0.079	-0.171	-0.25	0.054	-0.025		down	down
Q95YC6	C45B2.1	Uncharacterized protein	WBGene00016658	1.107	-0.069	1.038	0.026	1.132	up		up		up
Q95YC7	C45B2.2	Uncharacterized protein	WBGene00016659	0.921	0.306	1.227	0.393	1.314	up		up		up
Q95YD2	C45B2.6	Phospholipase A(2)	WBGene00016661	-0.228	-0.048	-0.276	0.311	0.083			down
Q18645	C45E5.1	Uncharacterized protein	WBGene00016664	-0.441	0.314	-0.127	0.093	-0.348	down	up			down
Q09504	C45G9.2	Uncharacterized tRNA-dihydrouridine synthase-like protein C45G9.2	WBGene00016674	1.077	-0.292	0.784	-0.123	0.954	up		up		up
Q09278	C45G9.5	Uncharacterized protein C45G9.5	WBGene00016676	-0.392	-0.032	-0.424	0.182	-0.21	down		down		down
Q18655	C46C2.2	MFS domain-containing protein	WBGene00008110	-0.071	0.344	0.273	0.214	0.143		up	up	up
Q9U3M0	C46C2.5	Uncharacterized protein	WBGene00008113	0.062	0.481	0.543	0.257	0.319		up	up		up
Q93382	C46F11.4	RNA helicase	WBGene00008119	0.532	-0.186	0.345	-0.008	0.523	up				up
O62100	C46F11.5	Uncharacterized protein	WBGene00008120	0.027	-0.094	-0.067	-0.258	-0.231
O02141	C46G7.2	Uncharacterized protein	WBGene00016722	0.067	-0.033	0.034	-0.062	0.005
Q9GYJ1	C46H11.2	Flavin-containing monooxygenase	WBGene00016728	-0.341	-0.245	-0.586	0.058	-0.282	down		down		down
Q9U3L5	C47B2.2	Uncharacterized protein	WBGene00008131	0.03	0.11	0.14	0.084	0.114
Q9U3L4	C47B2.9	S4 RNA-binding domain-containing protein	WBGene00008134	0.106	0.456	0.562	0.016	0.122		up	up
Q18668	C47D12.2	Dymeclin	WBGene00008136	-0.226	-0.072	-0.298	-0.036	-0.262
Q18683	C47E12.2	ADP/ATP translocase	WBGene00008147	0.249	0.304	0.553	-0.158	0.091		up	up
Q9NAQ9	C47G2.3	Mitochondrial import inner membrane translocase subunit tim-22	WBGene00008164	0.198	-0.158	0.041	-0.115	0.084
O01513	C48B6.2	Putative 40S ribosomal protein S4-like	WBGene00016740	1.494	-0.198	1.296	0.132	1.626	up		up		up
O02082	C48E7.1	Uncharacterized protein	WBGene00016749	0.054	0.137	0.191	0.048	0.102
O45310	C49A1.10	Uncharacterized protein	WBGene00008191	-0.38	0.158	-0.222	0.809	0.429				up
O44154	C49A9.2	Uncharacterized protein	WBGene00016756	-0.095	-0.019	-0.115	0.034	-0.062
O44151	C49A9.5	Uncharacterized protein	WBGene00016759	0.002	-0.013	-0.011	-0.123	-0.121
O44150	C49A9.6	Uncharacterized protein	WBGene00016760	0.259	-0.09	0.169	-0.246	0.013
Q9BKP7	C49A9.9	Uncharacterized protein	WBGene00016763	-0.007	-0.011	-0.018	0.035	0.028
Q9U3L3	C49C3.10	Protein kinase domain-containing protein	WBGene00008200	-0.164	-0.076	-0.241	-0.229	-0.393			down		down
Q9XUF9	C49C3.4	Uncharacterized protein	WBGene00008194	-1.237	0.285	-0.952	-0.213	-1.45	down		down		down
Q9XUF6	C49C3.9	Uncharacterized protein	WBGene00008199	-0.008	0.038	0.03	-0.566	-0.573
Q18705	C49C8.5	Fibrinogen C-terminal domain-containing protein	WBGene00016769	-0.151	0.004	-0.147	-0.276	-0.427					down
O17685	C49F5.7	Uncharacterized protein	WBGene00008211	-0.412	0	-0.412	0.365	-0.048
Q9GYQ6	C49H3.3	Uncharacterized protein	WBGene00016790	2.558	-0.063	2.495	0.026	2.584	up		up		up
P91982	C50B6.7	Alpha-amylase	WBGene00008220	-0.923	-0.241	-1.164	-1.105	-2.028	down		down	down	down
Q8ITY4	C50D2.5	Splicing factor 3B subunit 6-like protein	WBGene00016808	-0.073	-0.119	-0.192	0.005	-0.068
Q86S40	C50D2.7	Probable ADP-dependent glucokinase	WBGene00016810	-0.284	0.294	0.01	0.082	-0.202	down	up			down
Q8ITY6	C50D2.9	PKS_AT domain-containing protein	WBGene00016812	0.341	0.419	0.76	-0.053	0.288	up	up	up		up
P91177	C50F2.4	Uncharacterized protein	WBGene00016838	0.221	-0.162	0.06	-0.048	0.173
Q18739	C50F4.1	CHK domain-containing protein	WBGene00008229	-0.083	-0.159	-0.242	0.001	-0.083			down
Q95ZW9	C50F4.16	Nudix hydrolase domain-containing protein	WBGene00008238	-0.353	-0.015	-0.368	-0.006	-0.359	down		down		down
Q18771	C51E3.6	Uncharacterized protein	WBGene00008252	-0.764	0.388	-0.376	0.319	-0.445	down	up	down		down
Q8MQ99	C51E3.9	Uncharacterized protein	WBGene00008254	-0.069	-0.009	-0.079	0.197	0.128
Q22938	C52B9.4	Uncharacterized protein	WBGene00016867	-0.145	-0.192	-0.337	-0.238	-0.383			down		down
A0A0K3AXD0	C52D10.3	DUF4140 domain-containing protein	WBGene00016877	-0.136	-0.257	-0.392	-0.017	-0.152		down	down
Q18788	C52E4.5	Mannosyl-oligosaccharide 1,2-alpha-mannosidase C52E4.5	WBGene00008258	-0.026	0.112	0.086	0.159	0.133
A8WHT1	C53A5.17	tRNA (guanine(37)-N1)-methyltransferase	WBGene00194707	1.086	0.114	1.201	0.127	1.214	up		up		up
Q18805	C53B7.2	TIL domain-containing protein	WBGene00016893	0.673	-0.976	-0.303	-0.72	-0.047	up	down		down
Q09936	C53C9.2	Uncharacterized protein C53C9.2	WBGene00016898	-0.191	-0.003	-0.195	0.194	0.002	down		down	up
Q9N5V4	C53D5.5	Uncharacterized protein	WBGene00016906	-0.239	-0.125	-0.364	0.001	-0.238	down		down		down
Q18813	C53D6.7	Galectin	WBGene00008284	-0.03	-0.083	-0.114	0.043	0.013
O01826	C53H9.2	CP-type G domain-containing protein	WBGene00016907	0.44	-0.07	0.37	-0.026	0.414	up		up		up
Q2A956	C53H9.3	Uncharacterized protein	WBGene00044746	0.891	0.734	1.625	0.051	0.942	up		up		up
Q564S8	C54C8.12	Uncharacterized protein	WBGene00044242	-0.908	-1.052	-1.961	-0.477	-1.385			down		down
Q65CM5	C54E4.5	Inositol oxygenase	WBGene00016920	-0.699	-0.193	-0.892	-0.081	-0.78	down		down		down
Q18852	C54G4.7	Uncharacterized protein	WBGene00008317	-0.268	0.728	0.46	-0.324	-0.592		up	up		down
Q5FC47	C55A6.12	DUF1794 domain-containing protein	WBGene00044019	0.277	0.333	0.61	0.359	0.636	up	up	up	up	up
P90778	C55A6.3	Uncharacterized protein	WBGene00008332	-0.356	0.189	-0.167	0.196	-0.16	down
P90779	C55A6.4	Uncharacterized protein	WBGene00008333	-0.516	0.492	-0.023	0.353	-0.163	down	up		up
O17721	C55A6.6	Uncharacterized protein	WBGene00008335	-0.215	-0.168	-0.383	0.289	0.074	down		down	up
P90781	C55A6.7	Uncharacterized protein	WBGene00008336	-0.174	0.218	0.043	0.095	-0.079
Q18877	C56A3.5	Uncharacterized protein	WBGene00008344	1.313	-0.116	1.197	-0.105	1.208	up		up		up
Q18874	C56A3.6	Uncharacterized protein	WBGene00008345	-0.116	-0.045	-0.16	0.184	0.068
Q93249	cab-1	Protein cab-1	WBGene00000277	-0.026	-0.111	-0.138	0.039	0.013
Q27504	cah-3	Putative carbonic anhydrase 3	WBGene00000281	-0.065	-0.001	-0.066	-0.181	-0.246					down
Q21614	cah-4	Alpha-carbonic anhydrase domain-containing protein	WBGene00000282	-0.317	0.41	0.093	0.678	0.361	down	up		up	up
Q10462	cah-5	Putative carbonic anhydrase 5	WBGene00000283	-0.24	0.022	-0.218	-0.093	-0.332					down
O02637	cah-6	Carbonic anhydrase	WBGene00000284	-0.488	0.097	-0.39	0.231	-0.256
Q18136	cal-5	CALmodulin related genes	WBGene00006861	-0.526	0.494	-0.032	0.555	0.029	down	up		up
G5EBH7	calu-1	CALUmenin (Calcium-binding protein) homolog	WBGene00019760	0.4	-0.248	0.152	-0.25	0.15	up	down	up	down	up
Q9TYS8	calu-2	CALUmenin (Calcium-binding protein) homolog	WBGene00017240	-0.281	-0.16	-0.441	0.021	-0.261	down		down		down
G5ED41	cand-1	Cullin-associated NEDD8-dissociated protein 1	WBGene00013606	-0.185	-0.118	-0.303	-0.047	-0.232	down	down	down		down
P34685	cap-1	F-actin-capping protein subunit alpha	WBGene00000292	-0.063	-0.156	-0.219	-0.073	-0.135		down	down		down
P34686	cap-2	F-actin-capping protein subunit beta	WBGene00000293	-0.112	-0.205	-0.317	0.041	-0.071		down	down
Q9XW17	car-1	Cytokinesis, Apoptosis, RNA-associated	WBGene00012484	0.166	0.079	0.245	0.092	0.258			up		up
O76618	cars-1	Cysteine--tRNA ligase	WBGene00000800	-0.092	-0.045	-0.137	0.005	-0.088			down
Q95YA9	cas-1	C-CAP/cofactor C-like domain-containing protein	WBGene00000294	-0.011	-0.18	-0.191	-0.011	-0.022			down
G5EDE4	casc-3	Protein CASC3	WBGene00012343	0.073	-0.11	-0.037	-0.084	-0.01
A0A486WY88	cash-1	WD_REPEATS_REGION domain-containing protein	WBGene00010631	0.165	-0.192	-0.028	-0.037	0.128	up	down
Q19980	cat-4	GTP cyclohydrolase 1	WBGene00000298	0.16	0.158	0.318	0.419	0.579					up
G5EBE7	catp-1	Cation transporting ATPase	WBGene00013672	0.024	-0.074	-0.05	-0.161	-0.137
O16331	catp-3	Cation_ATPase_N domain-containing protein	WBGene00015660	0.207	0.214	0.421	0.028	0.235			up
Q9N323	catp-7	Cation-transporting ATPase	WBGene00022010	-0.052	-0.438	-0.49	-0.036	-0.088		down	down
P90747	catp-8	Probable manganese-transporting ATPase catp-8	WBGene00007514	-0.067	0.142	0.076	-0.034	-0.101
O02215	cbl-1	Cystathionine gamma-lyase	WBGene00007533	-1.046	0.702	-0.343	0.124	-0.922	down	up	down		down
Q7JMS5	cbp-3	Histone acetyltransferase	WBGene00009595	-0.642	-0.07	-0.712	0.187	-0.454	down		down		down
G5EFH8	cbs-1	PALP domain-containing protein	WBGene00013866	-0.075	-0.157	-0.232	-0.071	-0.146		down	down		down
A0A0S4XR43	ccar-1	SAP domain-containing protein	WBGene00003085	0.063	-0.276	-0.213	-0.082	-0.019		down	down
Q95XJ1	ccdc-12	CCDC (Human Coiled Coil Domain Containing) homolog	WBGene00022092	1.541	-0.081	1.459	-0.128	1.413	up		up		up
Q23382	ccdc-47	Coiled-coil domain-containing protein 47	WBGene00014204	-0.157	0.118	-0.039	-0.013	-0.169	down				down
Q17345	ccf-1	CCR4-NOT transcription complex subunit 7	WBGene00000369	-0.173	0.036	-0.137	0.125	-0.048
Q9NA39	ccg-1	Conserved Cysteine/Glycine domain protein	WBGene00000370	0.937	-0.544	0.393	-0.305	0.632	up	down	up	down	up
P53703	cchl-1	Probable holocytochrome-c-type synthase	WBGene00011527	0.622	0.581	1.203	-0.04	0.581	up	up	up		up
B3GWC3	ccr-4	Endo/exonuclease/phosphatase domain-containing protein	WBGene00000376	-0.031	-0.145	-0.176	-0.077	-0.108
P41988	cct-1	T-complex protein 1 subunit alpha	WBGene00000377	-0.136	0.092	-0.044	0.269	0.133				up
P47207	cct-2	T-complex protein 1 subunit beta	WBGene00000378	0.012	0.011	0.023	0.07	0.082
Q9N4J8	cct-3	T-complex protein 1 subunit gamma	WBGene00018782	0.046	0.02	0.066	0.138	0.184				up	up
P47208	cct-4	T-complex protein 1 subunit delta	WBGene00000379	0.017	-0.09	-0.074	0.091	0.108
P47209	cct-5	T-complex protein 1 subunit epsilon	WBGene00000380	-0.007	-0.011	-0.018	0.132	0.125					up
P46550	cct-6	T-complex protein 1 subunit zeta	WBGene00000381	0.116	-0.062	0.055	0.014	0.13
Q9TZS5	cct-7	T-complex protein 1 subunit eta	WBGene00020391	0.154	-0.065	0.089	0.001	0.154	up				up
Q9N358	cct-8	T-complex protein 1 subunit theta	WBGene00021934	0.04	0.03	0.07	0.115	0.155					up
Q9XVL8	ccz-1	Uncharacterized protein	WBGene00010283	0.023	-0.14	-0.116	-0.005	0.019
Q6A573	cdap-2	CD2AP homolog	WBGene00021549	-0.051	-0.202	-0.253	-0.077	-0.128		down	down
P81299	cdc-14	Tyrosine-protein phosphatase cdc-14	WBGene00000383	0.496	-0.102	0.394	-0.166	0.33	up		up		up
O02108	cdc-37	Probable Hsp90 co-chaperone cdc37	WBGene00021097	-0.021	-0.034	-0.055	0.077	0.056
Q05062	cdc-42	Cell division control protein 42 homolog	WBGene00000390	0.036	-0.302	-0.266	-0.158	-0.122		down
P54811	cdc-48.1	Transitional endoplasmic reticulum ATPase homolog 1	WBGene00007352	-0.215	-0.053	-0.268	0.036	-0.179	down		down		down
P54812	cdc-48.2	Transitional endoplasmic reticulum ATPase homolog 2	WBGene00008053	0.051	0.005	0.056	-0.01	0.041
Q21222	cdc-48.3	ATPase family protein 2 homolog	WBGene00010562	0.603	0.228	0.832	0.18	0.783	up		up		up
G5EFC4	cdc-5l	Cell Division Cycle related	WBGene00008386	-0.233	0.045	-0.189	0.161	-0.072	down
Q20628	cdd-2	Cytidine deaminase	WBGene00000392	-0.577	0.295	-0.282	0.221	-0.356	down	up	down		down
Q95QW4	cdf-1	Cation diffusion facilitator family protein 1	WBGene00000393	0.046	0.258	0.304	-0.235	-0.19
Q22541	cdf-2	Cation Diffusion Facilitator family	WBGene00011821	0.374	-0.206	0.168	-0.023	0.351
P53439	cdgs-1	Phosphatidate cytidylyltransferase	WBGene00016384	-0.03	-0.275	-0.305	-0.091	-0.121		down	down
G5EFV5	cdk-7	Cyclin-dependent kinase 7	WBGene00000408	-0.133	0.19	0.058	0.322	0.189
Q9U2Y2	cdkr-3	CDK5RAP3-like protein	WBGene00013765	-0.027	0.025	-0.002	0.108	0.081
Q20893	cdo-1	Cysteine dioxygenase 1	WBGene00018986	-0.022	-0.071	-0.093	-0.011	-0.033
G5EE89	cdr-1	CaDmium Responsive	WBGene00000412	0.365	0.18	0.545	-0.657	-0.292
G5ECX9	cdr-2	CaDmium Responsive	WBGene00008296	-1.37	1.157	-0.213	0.334	-1.036	down	up			down
G5EDZ7	cdr-4	CaDmium Responsive	WBGene00010470	-0.507	0.602	0.094	-0.257	-0.764	down	up			down
G5EET3	cdr-6	CaDmium Responsive	WBGene00010471	-0.344	0.481	0.137	0.151	-0.193	down	up
G5EBH4	cdr-7	CaDmium Responsive	WBGene00010472	-0.206	0.542	0.336	0.19	-0.017		up	up
P34618	cec-1	Chromo domain-containing protein cec-1	WBGene00000414	0.195	-0.217	-0.021	-0.003	0.192
Q19973	cec-5	Chromo domain-containing protein	WBGene00017993	-0.126	-0.137	-0.264	-0.16	-0.286
Q9XWD6	ced-1	Cell death abnormality protein 1	WBGene00000415	-0.011	-0.159	-0.171	0.008	-0.004
Q03206	ced-10	Ras-related protein ced-10	WBGene00000424	-0.006	-0.232	-0.238	-0.24	-0.246		down	down	down	down
Q9NHC3	ced-2	Cell death abnormality protein 2	WBGene00000416	-0.044	-0.258	-0.302	-0.028	-0.072			down
G5EEN3	ced-5	CED-5	WBGene00000419	-0.121	-0.102	-0.223	0.02	-0.101
O76337	ced-6	Cell death protein 6	WBGene00000420	0.112	-0.209	-0.097	-0.155	-0.043		down
P34358	ced-7	ABC transporter ced-7	WBGene00000421	-0.186	-0.05	-0.237	-0.034	-0.22	down		down		down
Q19824	cee-1	Conserved Edge Expressed protein	WBGene00017825	-0.047	0.03	-0.017	-0.021	-0.067
G5EBI4	ceeh-1	Epoxide hydrolase 1	WBGene00019329	-0.408	0.214	-0.194	0.162	-0.246	down	up	down	up	down
G5EDL5	ceeh-2	Epoxide hydrolase 2	WBGene00010628	-0.2	0.136	-0.064	0.179	-0.021
H2KY55	CELE_cTel55X.1	Uncharacterized protein	WBGene00007068	-0.444	0.111	-0.334	-0.252	-0.696					down
Q18910	CELE_D1005.2	UTP--glucose-1-phosphate uridylyltransferase	WBGene00016996	0.213	0.076	0.29	-0.144	0.069
Q18926	CELE_D1022.4	DLH domain-containing protein	WBGene00017023	0.038	-0.098	-0.06	0.138	0.176
Q7YX64	CELE_D1053.4	Activin_recp domain-containing protein	WBGene00008369	-0.079	0.204	0.124	0.133	0.053
Q18943	CELE_D1054.10	Uncharacterized protein	WBGene00008377	-0.804	0.132	-0.672	-0.075	-0.88	down		down		down
Q18946	CELE_D1054.8	Uncharacterized protein	WBGene00008375	1.099	-0.952	0.147	0.629	1.728	up				up
Q6A586	CELE_D1069.3	Uncharacterized protein	WBGene00017037	0.067	-0.321	-0.253	-0.15	-0.083		down	down
O17726	CELE_D1086.1	DUF19 domain-containing protein	WBGene00008388	-0.276	0.01	-0.266	0.087	-0.189	down		down		down
C6KRN4	CELE_D1086.11	Uncharacterized protein	WBGene00044081	-0.379	-0.663	-1.043	-0.022	-0.401			down
Q5FC37	CELE_D1086.12	Uncharacterized protein	WBGene00044082	-1.54	0.503	-1.037	0.508	-1.032	down	up	down	up	down
O17725	CELE_D1086.3	DUF19 domain-containing protein	WBGene00008390	-0.209	0.563	0.354	0.539	0.329		up	up	up
Q1W0S0	CELE_D2021.4	Uncharacterized protein	WBGene00017048	-0.434	0.278	-0.155	0.277	-0.157
O17735	CELE_D2023.6	ABC1 domain-containing protein	WBGene00008410	0.119	0.282	0.401	-0.37	-0.251		up	up	down	down
P90788	CELE_D2030.2	Uncharacterized protein	WBGene00008412	-0.088	0.392	0.303	-0.207	-0.295		up	up		down
P90790	CELE_D2030.3	Uncharacterized protein	WBGene00008413	0.665	-0.073	0.591	-0.058	0.606	up		up		up
Q18986	CELE_D2045.8	BTB domain-containing protein	WBGene00008425	-0.186	-0.09	-0.276	-0.194	-0.38					down
Q18989	CELE_D2045.9	Uncharacterized protein	WBGene00008426	0.759	-0.089	0.671	-0.089	0.67	up		up		up
Q9UAT1	CELE_D2063.1	PKS_ER domain-containing protein	WBGene00017060	0.666	0.071	0.737	0.273	0.939	up		up		up
P91194	CELE_D2092.4	Thioredoxin domain-containing protein	WBGene00017065	0.275	-0.095	0.18	-0.001	0.274	up		up		up
Q0MQ67	CELE_D2096.13	Uncharacterized protein	WBGene00044953	-0.024	0.487	0.463	0.503	0.479
Q9UAW2	CELE_DC2.5	Uncharacterized protein	WBGene00017082	-0.513	1.039	0.526	-0.009	-0.521	down	up	up		down
A9CZN9	CELE_E01A2.1	GCS light chain	WBGene00017084	-0.115	0.045	-0.069	0.165	0.051				up
G5EDV0	CELE_E01G4.6	Uncharacterized protein	WBGene00008448	0.474	0.093	0.568	-0.411	0.063
O17742	CELE_E03H4.8	Coatomer_WDAD domain-containing protein	WBGene00008476	0.167	-0.601	-0.434	0.092	0.259		down	down
Q19056	CELE_E04F6.4	Uncharacterized protein	WBGene00017124	-0.998	0.183	-0.815	-0.057	-1.055	down		down		down
Q19063	CELE_E04F6.8	Uncharacterized protein	WBGene00017127	0.298	-0.349	-0.051	-0.172	0.126	up	down
Q19064	CELE_E04F6.9	Uncharacterized protein	WBGene00017128	0.199	-0.273	-0.075	0.098	0.297					up
Q95QN1	CELE_F01F1.15	DUF3456 domain-containing protein	WBGene00017169	0.314	-0.012	0.302	0.092	0.406					up
Q19093	CELE_F01F1.2	COX assembly mitochondrial protein	WBGene00017159	0.203	-0.221	-0.018	0.015	0.218		down			up
Q19107	CELE_F02C12.1	Uncharacterized protein	WBGene00008515	-0.311	-0.118	-0.429	0.074	-0.237	down		down		down
Q19108	CELE_F02C12.2	Uncharacterized protein	WBGene00008516	-0.398	-0.131	-0.529	0.717	0.319
G5EC96	CELE_F02D8.4	Peptidase_M14 domain-containing protein	WBGene00008521	-0.02	-0.285	-0.305	-0.036	-0.056		down	down
O01314	CELE_F02E9.1	Uncharacterized protein	WBGene00008528	0.004	-0.07	-0.066	0.014	0.019
Q19132	CELE_F07A11.4	Ubiquitin carboxyl-terminal hydrolase	WBGene00008547	0.368	-0.098	0.27	0.002	0.37	up		up		up
Q19133	CELE_F07A11.5	Ribokinase	WBGene00008548	-0.543	0.203	-0.34	0.085	-0.458	down	up	down		down
Q19147	CELE_F07C3.2	Uncharacterized protein	WBGene00017193	-0.407	0.019	-0.388	0.308	-0.099	down		down
P91223	CELE_F07E5.5	Uncharacterized protein	WBGene00017210	1.45	-0.275	1.175	0.038	1.488	up		up		up
Q8WQF7	CELE_F07F6.8	Uncharacterized protein	WBGene00017220	1.164	-0.339	0.825	-0.544	0.62	up		up
A3FPJ3	CELE_F07G6.10	Uncharacterized protein	WBGene00045271	-0.499	-0.151	-0.65	0.446	-0.053	down		down
P91230	CELE_F08D12.7	Uncharacterized protein	WBGene00017250	0.15	0.221	0.371	0.467	0.617			up	up	up
A0A4V0IJ83	CELE_F08F1.4	Uncharacterized protein	WBGene00017258	-1.735	0.146	-1.588	1.592	-0.143	down		down	up
Q22945	CELE_F08F3.4	Epimerase domain-containing protein	WBGene00017262	-1.271	1.469	0.199	0.378	-0.893	down	up			down
Q95ZW2	CELE_F08F8.7	Ribulose-phosphate 3-epimerase	WBGene00017272	-0.292	0.457	0.165	0.143	-0.149	down	up	up		down
G5EE90	CELE_F09B9.4	Uncharacterized protein	WBGene00008603	0.072	0.36	0.432	0.533	0.605			up		up
Q19257	CELE_F09E5.7	Uncharacterized protein	WBGene00017285	0.072	-0.127	-0.055	-0.083	-0.011
Q19275	CELE_F09F7.5	CRIB domain-containing protein	WBGene00017302	-0.052	-0.193	-0.244	-0.137	-0.189
Q19276	CELE_F09F7.6	Uncharacterized protein	WBGene00017303	0.102	-0.841	-0.739	-0.256	-0.154		down	down
A7LPJ5	CELE_F10A3.17	FTH domain-containing protein	WBGene00045507	-0.453	0.167	-0.286	0.421	-0.032	down		down	up
A0A078BPH9	CELE_F10C1.9	Uncharacterized protein	WBGene00044296	0.081	0.128	0.209	-0.324	-0.243
O17777	CELE_F10D11.2	Uncharacterized protein	WBGene00008648	1.108	-0.452	0.656	-0.766	0.342	up
H9G2Z8	CELE_F10D11.6	BPI2 domain-containing protein	WBGene00008652	0.183	-0.234	-0.051	-0.159	0.024
Q19302	CELE_F10E7.5	Ribosome assembly factor mrt4	WBGene00017347	2.373	-0.005	2.368	0.234	2.607	up		up		up
Q19303	CELE_F10E7.6	Uncharacterized protein	WBGene00017348	0.139	0.221	0.36	-0.138	0.002			up
Q6A1T5	CELE_F10G8.9	Beta-ketoacyl-[acyl-carrier-protein] synthase I	WBGene00008667	-0.099	0.139	0.04	-0.16	-0.259
Q9U3K1	CELE_F11A10.6	Uncharacterized protein	WBGene00008687	-0.296	-0.213	-0.509	0.036	-0.261			down
Q9XVQ8	CELE_F11E6.4	Uncharacterized protein	WBGene00008708	-0.276	0.019	-0.257	0.159	-0.117
P91245	CELE_F11G11.5	Brain protein I3	WBGene00017385	0.075	-0.268	-0.193	-0.102	-0.027		down
Q1EPL7	CELE_F12E12.11	Uncharacterized protein	WBGene00044811	0.248	-0.237	0.012	-0.015	0.233
O44482	CELE_F13B6.2	Uncharacterized protein	WBGene00017417	0.339	0.089	0.427	-0.134	0.205
O76561	CELE_F13C5.2	Bromo domain-containing protein	WBGene00017423	0.102	0.135	0.237	0.121	0.222
Q19391	CELE_F13D11.4	3Beta_HSD domain-containing protein	WBGene00017429	-0.548	0.07	-0.478	0.395	-0.153	down		down
Q19395	CELE_F13D12.3	Uncharacterized protein	WBGene00008739	0.737	-0.138	0.599	-0.139	0.598	up
K8F7Z5	CELE_F13D2.1	A2M domain-containing protein	WBGene00008735	0.283	-0.462	-0.18	-0.272	0.011	up	down		down
G5ECC1	CELE_F13G3.10	HYPK_UBA domain-containing protein	WBGene00008768	0.055	0.15	0.205	0.017	0.072			up
Q19422	CELE_F13G3.7	Uncharacterized protein	WBGene00008767	-0.322	0.052	-0.27	0.1	-0.222
Q1ZXU7	CELE_F13H10.8	Uncharacterized protein	WBGene00044784	0.063	-0.042	0.022	-0.143	-0.08
Q95QL1	CELE_F13H8.11	Lipase_GDSL domain-containing protein	WBGene00017443	-0.496	-0.404	-0.9	0.095	-0.401	down	down	down		down
Q19433	CELE_F13H8.2	WD_REPEATS_REGION domain-containing protein	WBGene00017435	1.224	-0.025	1.199	0.069	1.293	up		up		up
Q19431	CELE_F13H8.3	IU_nuc_hydro domain-containing protein	WBGene00017436	-0.31	-0.124	-0.434	-0.084	-0.393			down
Q19434	CELE_F13H8.9	Aminotran_5 domain-containing protein	WBGene00017442	-0.058	-0.234	-0.292	-0.203	-0.261
Q19441	CELE_F14B8.4	Uncharacterized protein	WBGene00017446	-1.336	-0.043	-1.379	0.109	-1.227	down		down		down
Q19457	CELE_F14D7.5	Uncharacterized protein	WBGene00008792	0.071	0.437	0.509	0.826	0.897					up
Q19451;Q7YX37	CELE_F14D7.7	Uncharacterized protein	WBGene00008794	0.956	0.356	1.313	0.502	1.458	up		up		up
Q9GUC8	CELE_F14F9.4	Uncharacterized protein	WBGene00017467	0.289	-0.906	-0.617	0.269	0.558		down
A5Z2T9	CELE_F15B9.10	Uncharacterized protein	WBGene00045418	0.094	-0.009	0.085	-0.021	0.073
Q19481	CELE_F15B9.6	Uncharacterized protein	WBGene00008850	0.205	-1.116	-0.911	0.019	0.224		down	down
G5ECT2	CELE_F15E6.3	RNA binding protein	WBGene00017484	-0.415	-0.362	-0.777	-0.079	-0.494	down	down	down		down
Q94187	CELE_F16F9.4	Uncharacterized protein	WBGene00017515	0.506	0.299	0.805	0.03	0.536	up		up		up
O16214	CELE_F17A9.4	Oxidored_FMN domain-containing protein	WBGene00017536	0.41	0.013	0.423	0.138	0.549	up		up		up
O16215	CELE_F17A9.5	Oxidored_FMN domain-containing protein	WBGene00017537	-0.45	0.349	-0.1	0.346	-0.104	down	up		up
A5Z2U7	CELE_F17B5.8	Uncharacterized protein	WBGene00045458	-0.08	0.185	0.105	-0.009	-0.089
Q9BI97	CELE_F17C11.11	Uncharacterized protein	WBGene00008922	-0.182	-0.563	-0.745	-0.149	-0.331		down	down		down
G5EC34	CELE_F17C11.12	MFS domain-containing protein	WBGene00008923	-0.101	-0.131	-0.233	-0.214	-0.315					down
C0P278	CELE_F17C8.9	Aspartate dehydrogenase domain-containing protein	WBGene00185014	-0.206	0.29	0.084	0.17	-0.036	down	up
O61524	CELE_F17E9.2	Uncharacterized protein	WBGene00017539	-0.948	2.091	1.142	-0.283	-1.231
O61522	CELE_F17E9.4	Uncharacterized protein	WBGene00017541	-0.798	0.071	-0.727	0.122	-0.676	down		down		down
G5ECN2	CELE_F17H10.1	Uncharacterized protein	WBGene00008925	-0.638	0.477	-0.16	-0.227	-0.864
Q19531	CELE_F17H10.2	Uncharacterized protein	WBGene00008926	-0.367	-0.111	-0.479	0.199	-0.168	down		down
G5EFM7	CELE_F18C12.3	Serum response factor-binding protein 1	WBGene00008934	1.36	-0.031	1.329	0.135	1.495	up		up		up
Q19577	CELE_F18H3.1	SPRY domain-containing protein 7	WBGene00008939	-0.223	-0.221	-0.444	0.258	0.035			down
H2L2A8	CELE_F19B6.1	Uridine kinase	WBGene00008948	0.274	-0.039	0.235	0.014	0.288	up		up		up
G5EC50	CELE_F19C6.4	Uncharacterized protein	WBGene00008953	-0.594	0.114	-0.48	0.343	-0.251
Q19589	CELE_F19C7.2	Uncharacterized protein	WBGene00017592	-0.071	-0.583	-0.654	-0.289	-0.359		down	down		down
O01516	CELE_F19F10.3	DUF4440 domain-containing protein	WBGene00017599	-1.169	-0.053	-1.222	-0.184	-1.353	down		down		down
Q19615	CELE_F20A1.1	Uncharacterized protein	WBGene00017613	0.288	0.118	0.405	0.356	0.643			up		up
Q93535	CELE_F20D1.3	Uncharacterized protein	WBGene00008975	0.064	0.028	0.091	0.022	0.086
Q19655	CELE_F20D6.11	Rieske domain-containing protein	WBGene00017640	0.096	0.068	0.163	0.055	0.151			up
Q19647	CELE_F20D6.5	CHK domain-containing protein	WBGene00017635	-0.019	0.366	0.347	0.096	0.077
A8DZ49;Q56VZ3	CELE_F20E11.17	Uncharacterized protein	WBGene00050906	0.775	-2.838	-2.063	0.015	0.79		down	down
Q93544	CELE_F20G2.1	Uncharacterized protein	WBGene00008985	2.14	-1.61	0.53	0.932	3.072	up				up
Q93545	CELE_F20G2.2	Uncharacterized protein	WBGene00008986	0.256	-0.097	0.159	0.387	0.643				up	up
Q93546	CELE_F20G2.3	CRAL-TRIO domain-containing protein	WBGene00008987	0.061	0.263	0.325	0.007	0.068			up
H2FLJ4	CELE_F21A3.11	Purple acid phosphatase	WBGene00219316	-0.576	-0.184	-0.76	0.239	-0.336	down		down		down
O17829	CELE_F21A3.3	Uncharacterized protein	WBGene00008993	0.383	0.369	0.753	0.159	0.543	up	up	up		up
Q19660	CELE_F21C10.10	Uncharacterized protein	WBGene00017659	-0.059	0.36	0.301	0.202	0.143		up	up	up
Q19663	CELE_F21C10.7	Uncharacterized protein	WBGene00017657	0.129	-0.124	0.004	0.023	0.151	up	down			up
Q19680	CELE_F21D5.1	Phosphoacetylglucosamine mutase	WBGene00009006	0.088	-0.224	-0.136	-0.291	-0.203		down		down	down
Q19687	CELE_F21D5.3	Plastocyanin-like domain-containing protein	WBGene00009008	-0.395	0.794	0.399	0.067	-0.328	down	up	up		down
O16585	CELE_F21E9.2	Uncharacterized protein	WBGene00017666	-0.305	0.088	-0.216	0.237	-0.067
P91269	CELE_F21F3.6	Uncharacterized protein	WBGene00017675	-0.228	-0.526	-0.755	0.023	-0.205			down
O45394	CELE_F22B8.7	MOSC domain-containing protein	WBGene00009049	-0.326	0.568	0.243	0.019	-0.306	down	up	up		down
Q19723	CELE_F22D6.2	Uncharacterized protein	WBGene00009050	-0.203	-0.185	-0.388	0.177	-0.026
G5ED57	CELE_F22E12.1	Uncharacterized protein	WBGene00009058	-0.243	-0.233	-0.476	-0.206	-0.449			down		down
O16719	CELE_F22E5.1	Uncharacterized protein	WBGene00017703	-0.461	-0.336	-0.797	0.366	-0.095
Q7JNW8	CELE_F22F4.5	Uncharacterized protein	WBGene00017718	0.166	0.459	0.625	0.123	0.289		up	up		up
O45398	CELE_F22G12.4	Uncharacterized protein	WBGene00009064	0.081	-0.08	0.002	-0.14	-0.059
A8WHS3	CELE_F23B12.4	Uncharacterized protein	WBGene00009081	0.27	0.044	0.314	0.112	0.382	up		up		up
O45400	CELE_F23B2.10	RING-type domain-containing protein	WBGene00009077	0.896	-1.52	-0.624	-0.742	0.154
Q9TXI4	CELE_F23C8.5	Electron transfer flavoprotein subunit beta	WBGene00017734	-0.008	0.444	0.436	-0.041	-0.049		up	up
O17068	CELE_F23F1.2	Uncharacterized protein	WBGene00017743	-0.069	-0.578	-0.647	-0.296	-0.365
O17065	CELE_F23F1.4	Uncharacterized protein	WBGene00017745	0.047	0.083	0.13	-0.101	-0.054
O17066	CELE_F23F1.5	Snurportin-1	WBGene00017746	0.581	-0.371	0.21	-0.206	0.375
O17069	CELE_F23F1.6	AA_permease_C domain-containing protein	WBGene00017747	-0.118	-0.329	-0.447	0.005	-0.113		down	down
O17070	CELE_F23F1.7	Uncharacterized protein	WBGene00017748	-0.065	-0.151	-0.217	-0.055	-0.12			down
Q95QJ3	CELE_F23F12.12	Uncharacterized protein	WBGene00017756	-0.513	0.331	-0.182	-0.028	-0.541	down				down
H2KZV4	CELE_F23H11.4	Rho-GAP domain-containing protein	WBGene00017760	-0.04	-0.368	-0.408	-0.034	-0.074
O01917	CELE_F23H11.5	Deltameth_res domain-containing protein	WBGene00000263	0.094	-0.719	-0.625	0.331	0.425		down	down
P91270	CELE_F25B4.7	ADP/ATP translocase	WBGene00017770	0.316	0.28	0.596	-0.168	0.147	up	up	up
Q8MNR9	CELE_F25B4.8	CENP-V/GFA domain-containing protein	WBGene00017771	-0.499	0.123	-0.376	0.408	-0.091	down		down	up
Q19774	CELE_F25D1.5	Uncharacterized protein	WBGene00009110	-0.253	0.318	0.066	0.739	0.487
G4SF79	CELE_F25E2.2	Uncharacterized protein	WBGene00017780	-0.026	0.24	0.214	0.232	0.205
Q19781	CELE_F25E2.3	Uncharacterized protein	WBGene00017781	-0.239	-0.227	-0.467	0.21	-0.029	down	down	down	up
O76651	CELE_F25E5.5	Uncharacterized protein	WBGene00017786	-0.247	-0.286	-0.533	-0.009	-0.257	down	down	down		down
P91272	CELE_F25F8.1	Uncharacterized protein	WBGene00017795	0.078	-0.645	-0.568	-0.556	-0.478		down	down	down	down
Q93568	CELE_F25H2.4	MPN domain-containing protein	WBGene00009118	-0.257	0.061	-0.197	0.296	0.038
Q93595	CELE_F26A3.1	Lipid droplet-associated hydrolase	WBGene00009140	0.001	0.061	0.062	-0.045	-0.044
G5ECL7	CELE_F26D2.15	Uncharacterized protein	WBGene00009153	1.46	-0.81	0.65	0.828	2.288	up				up
O18686	CELE_F26E4.2	Uncharacterized protein	WBGene00009157	-0.167	0.115	-0.052	0.232	0.065
H2KYE2	CELE_F26F12.3	Uncharacterized protein	WBGene00017834	-0.212	-0.104	-0.316	-0.014	-0.227			down
Q95QI6	CELE_F26F4.12	ANK_REP_REGION domain-containing protein	WBGene00017831	-0.154	-0.044	-0.198	-0.059	-0.213
H2KZ20	CELE_F26G1.2	Uncharacterized protein	WBGene00017838	-0.052	-0.425	-0.477	-0.347	-0.399		down	down		down
A0A131MCJ0	CELE_F27B10.1	Uncharacterized protein	WBGene00017850	-1.659	0.876	-0.783	0.973	-0.686	down
Q6BEW1	CELE_F27C1.2	Copper transport protein	WBGene00017852	-0.196	-0.359	-0.555	-0.034	-0.23		down	down
P91280	CELE_F27C1.6	Uncharacterized protein	WBGene00017855	0.942	-0.121	0.821	0.062	1.004	up		up		up
Q95R11	CELE_F28B3.10	Uncharacterized protein	WBGene00017889	0.274	0.115	0.389	-0.507	-0.232
Q19853	CELE_F28B4.3	Uncharacterized protein	WBGene00017892	0.173	-0.459	-0.286	-0.299	-0.126		down	down	down
I2HA91	CELE_F28C6.8	Uncharacterized protein	WBGene00009207	0.045	0.362	0.408	0.144	0.189		up	up
D5MNM9	CELE_F28D9.4	Transmembrane protein 242	WBGene00009220	0.112	0.32	0.432	0.164	0.275		up	up
P83386;P83387	CELE_F28H1.4	MARVEL domain-containing protein	WBGene00017909	-0.16	-0.289	-0.45	-0.187	-0.347			down
Q19891	CELE_F28H7.3	Lipase_3 domain-containing protein	WBGene00009237	0.449	0.374	0.823	-0.818	-0.369
Q9GYI1	CELE_F29B9.11	Uncharacterized protein	WBGene00017925	0.255	-0.613	-0.358	0.112	0.367	up	down	down		up
Q9GYI7	CELE_F29B9.8	Uncharacterized protein	WBGene00017923	-0.438	0.097	-0.341	0.37	-0.068	down		down	up
G5ECA2	CELE_F29C6.1	Uncharacterized protein	WBGene00009243	-0.443	0.21	-0.233	0.224	-0.218	down
Q2XMZ1	CELE_F30A10.13	Uncharacterized protein	WBGene00044680	-0.777	-1.005	-1.783	0.537	-0.241	down	down	down
A5Z2U9	CELE_F30A10.14	Uncharacterized protein	WBGene00045473	-0.214	-0.459	-0.673	0.004	-0.21			down
Q8I4K3	CELE_F30F8.9	LETM1 domain-containing protein	WBGene00009276	0.517	0.154	0.672	-0.056	0.461	up	up	up		up
O45417	CELE_F31D4.2	Sugar phosphate phosphatase	WBGene00009290	-0.259	-0.089	-0.348	-0.033	-0.291	down		down		down
Q9U3H4	CELE_F31D4.9	NADH dehydrogenase [ubiquinone] 1 alpha subcomplex subunit 1	WBGene00009294	0.179	-0.925	-0.746	0.372	0.551		down	down		up
Q19932	CELE_F31D5.2	Uncharacterized protein	WBGene00017945	0.05	-0.302	-0.252	-0.301	-0.251
Q19936	CELE_F31E8.4	Copper transport protein	WBGene00017954	-0.146	0.207	0.061	0.266	0.12
O62198	CELE_F32A11.1	Uncharacterized protein	WBGene00009307	-0.202	0.046	-0.156	0.006	-0.197
Q95QH4	CELE_F32A5.8	Uncharacterized protein	WBGene00017971	-0.011	-0.181	-0.192	0.024	0.012		down	down
H2KZX9	CELE_F32B5.6	Uncharacterized protein	WBGene00017979	-0.401	0.069	-0.332	0.206	-0.195	down
Q8I4K2	CELE_F32D8.12	FAD-binding PCMH-type domain-containing protein	WBGene00009334	-0.131	0.284	0.153	-0.114	-0.245		up			down
Q7YTG8	CELE_F32D8.14	Protein YIPF	WBGene00009336	-0.098	-0.244	-0.342	-0.377	-0.475
Q9U3H0	CELE_F32D8.5	Uncharacterized protein	WBGene00009330	0.648	0.411	1.059	-0.054	0.594	up	up	up		up
P91991	CELE_F32H5.1	Pept_C1 domain-containing protein	WBGene00009347	-0.772	-0.206	-0.978	-0.536	-1.308	down		down		down
O62210	CELE_F32H5.3	Uncharacterized protein	WBGene00009349	-0.045	-0.004	-0.049	-0.082	-0.127
O62214	CELE_F33A8.4	Uncharacterized protein	WBGene00009352	1.532	-0.036	1.495	-0.094	1.437	up		up		up
Q17680	CELE_F33C8.4	Uncharacterized protein	WBGene00009358	-0.119	-0.166	-0.285	0.1	-0.019			down
O44781;Q9BL61	CELE_F33D11.10	RNA helicase	WBGene00018007	0.098	-0.004	0.093	0.078	0.176					up
O61853	CELE_F33E11.3	KLRAQ domain-containing protein	WBGene00018011	0.003	-0.344	-0.341	-0.326	-0.323			down
O62219	CELE_F33H2.2	Uncharacterized protein	WBGene00009366	0.077	-0.07	0.007	0.014	0.091
O62216	CELE_F33H2.6	TPR_REGION domain-containing protein	WBGene00009369	-0.036	-0.39	-0.426	-0.165	-0.201		down	down
Q20007	CELE_F35A5.1	Uncharacterized protein	WBGene00018024	0.029	-0.09	-0.061	-0.034	-0.005
Q20005	CELE_F35A5.8	BAR domain-containing protein	WBGene00001335	-0.124	-0.075	-0.2	0.026	-0.099			down
Q8I4J8	CELE_F35B12.9	Uncharacterized protein	WBGene00009388	0.079	-0.205	-0.126	0.152	0.231
Q20034	CELE_F35D11.4	CYTH domain-containing protein	WBGene00018045	0.327	0.516	0.843	0.383	0.71	up	up	up	up	up
O02362	CELE_F35E12.10	CUB_2 domain-containing protein	WBGene00009434	-0.517	0.461	-0.056	0.062	-0.455	down	up			down
O02358	CELE_F35E12.6	CUB_2 domain-containing protein	WBGene00009430	0.367	0.104	0.47	-0.069	0.298			up
Q9GYT3	CELE_F35F10.1	PAW domain-containing protein	WBGene00018052	-0.433	0.11	-0.323	0.648	0.215	down		down	up
Q9GYT2	CELE_F35F10.13	DUF19 domain-containing protein	WBGene00018062	1.446	0.051	1.497	0.21	1.656	up		up		up
Q9GYU3;Q9TXS4	CELE_F35F10.5	Uncharacterized protein	WBGene00018055	-0.451	0.016	-0.435	1.026	0.574
Q9GYU1	CELE_F35F10.6	Uncharacterized protein	WBGene00018056	-0.518	-0.018	-0.536	0.266	-0.252	down		down
Q20058	CELE_F35G12.12	Uncharacterized protein	WBGene00009445	0.009	-0.215	-0.206	-0.051	-0.041		down	down
Q20063	CELE_F35G2.1	Sulfhydryl oxidase	WBGene00009435	0.14	-0.024	0.117	-0.177	-0.036
Q20075	CELE_F35H10.2	Uncharacterized protein	WBGene00018068	-0.392	0.162	-0.229	0.287	-0.105	down
Q20070	CELE_F35H10.6	Uncharacterized protein	WBGene00018071	0.6	0.108	0.709	0.11	0.71	up		up		up
G5EDM5	CELE_F36A2.3	Uncharacterized protein	WBGene00009453	-0.596	-1.067	-1.663	-0.282	-0.878	down	down	down		down
P90860	CELE_F36A2.7	Uncharacterized protein	WBGene00009454	0.398	-0.666	-0.267	0.018	0.416	up	down	down		up
Q8I4J6	CELE_F36A2.9	Lipase_GDSL domain-containing protein	WBGene00009456	0.234	-0.151	0.083	-0.131	0.103	up
O62234	CELE_F36F2.1	Costars domain-containing protein	WBGene00009475	0.153	-0.297	-0.144	-0.156	-0.003		down
Q20122	CELE_F37C12.3	Acyl carrier protein	WBGene00018151	0.013	0.105	0.118	-0.046	-0.033
O61196	CELE_F37C4.6	Amino_oxidase domain-containing protein	WBGene00018146	0.033	0.34	0.373	0.116	0.149		up	up		up
G4RYA5	CELE_F38A1.8	SRP54 domain-containing protein	WBGene00009521	-0.258	0.162	-0.096	0.146	-0.112	down	up		up	down
H2KZA2	CELE_F38A5.2	Uncharacterized protein	WBGene00018161	-0.022	0.077	0.055	-0.091	-0.113
Q20143	CELE_F38B6.4	Trifunctional purine biosynthetic protein adenosine-3	WBGene00018174	-0.651	-0.081	-0.733	0.18	-0.472	down		down		down
Q20177	CELE_F38E9.1	Uncharacterized protein	WBGene00018184	-0.116	-0.181	-0.297	-0.114	-0.231			down
O45496	CELE_F39B2.3	PKS_ER domain-containing protein	WBGene00009554	0.17	0.063	0.233	0.192	0.363			up		up
O45500	CELE_F39B2.8	G_PROTEIN_RECEP_F3_4 domain-containing protein	WBGene00009558	-1.261	1.102	-0.159	0.084	-1.178
Q20199	CELE_F39H12.3	RIIa domain-containing protein	WBGene00018214	0.091	-0.514	-0.422	-0.243	-0.152		down	down
G5EE11	CELE_F39H2.3	GCV_T domain-containing protein	WBGene00009563	0.144	0.185	0.329	-0.033	0.11		up	up
O16265	CELE_F40A3.2	EGF-like domain-containing protein	WBGene00018217	0.206	0.286	0.493	-0.008	0.198
O16266	CELE_F40A3.6	Uncharacterized protein	WBGene00018221	0.304	-0.091	0.213	0.071	0.376	up		up		up
Q20202	CELE_F40E10.5	Uncharacterized protein	WBGene00009573	0.766	-2.379	-1.613	-1.285	-0.519		down	down	down
G5EGF1	CELE_F40E10.6	Uncharacterized protein	WBGene00009574	-0.508	-0.203	-0.711	-0.159	-0.667			down		down
Q20220	CELE_F40F4.7	N-acetyltransferase domain-containing protein	WBGene00018238	0.006	-0.191	-0.185	-0.112	-0.106
Q20226	CELE_F40F8.4	Uncharacterized protein	WBGene00009577	0.294	0.05	0.344	-0.069	0.225
H2L2A2	CELE_F40F8.5	Uncharacterized protein	WBGene00009578	-0.251	-0.498	-0.749	-0.266	-0.517	down	down	down		down
C0Z1Y9	CELE_F40G9.17	ANK_REP_REGION domain-containing protein	WBGene00185078	-0.086	0.188	0.102	0.052	-0.034		up
C0Z1Y6	CELE_F40G9.5	Uncharacterized protein	WBGene00018241	-0.071	0.09	0.019	0.013	-0.059
Q966J6	CELE_F41B4.1	Uncharacterized protein	WBGene00018257	-0.025	-0.145	-0.17	0.014	-0.011			down
A8WFM5	CELE_F41D9.2	DOMON domain-containing protein	WBGene00018282	-0.141	0.223	0.081	0.454	0.313
B1GRK5	CELE_F41E6.5	FMN hydroxy acid dehydrogenase domain-containing protein	WBGene00018286	0.277	0.278	0.555	0.279	0.556	up	up	up		up
Q20287	CELE_F41G3.6	Uncharacterized protein	WBGene00018302	-0.106	-0.233	-0.339	-0.046	-0.152		down	down
Q20310	CELE_F42A10.5	Uncharacterized protein	WBGene00018341	0.089	0.062	0.151	0.106	0.195			up		up
Q20311	CELE_F42A10.6	Uncharacterized protein	WBGene00018342	-0.879	0.609	-0.27	-0.693	-1.572	down				down
Q20329	CELE_F42C5.9	PH domain-containing protein	WBGene00018349	-0.158	-0.211	-0.369	0.01	-0.148	down	down	down		down
Q20344	CELE_F42F12.3	3-oxo-5-alpha-steroid 4-dehydrogenase	WBGene00009635	-0.359	0.118	-0.24	0.222	-0.137
Q20340	CELE_F42F12.4	Acireductone dioxygenase	WBGene00009636	-0.169	0.151	-0.018	0.2	0.031
Q09393	CELE_F42G10.1	Uncharacterized protein	WBGene00009645	-0.066	0.086	0.02	0.174	0.108
O44509	CELE_F42G8.10	NADH dehydrogenase [ubiquinone] 1 beta subcomplex subunit 11, mitochondrial	WBGene00018361	0.183	-0.592	-0.409	0.044	0.228	up	down	down		up
Q20358	CELE_F43C9.2	Uncharacterized protein	WBGene00018376	0.031	-0.074	-0.043	-0.099	-0.068
Q564S3	CELE_F43D2.6	Uncharacterized protein	WBGene00044191	0.01	-0.077	-0.067	0.056	0.066
Q95ZT6	CELE_F43H9.4	Glycine N-acyltransferase-like protein	WBGene00018400	-0.062	0.254	0.192	0.157	0.095
Q20380	CELE_F44A2.3	Uncharacterized protein	WBGene00018403	-0.023	0.086	0.063	0.316	0.293				up	up
Q20392	CELE_F44D12.2	Uncharacterized protein	WBGene00009679	-0.41	-0.25	-0.66	-0.201	-0.611	down		down		down
Q95QG1	CELE_F44E2.10	Malectin domain-containing protein	WBGene00018423	-0.018	0.019	0.002	0.028	0.01
Q9XU97	CELE_F44E5.1	Uncharacterized protein	WBGene00009688	-0.03	-0.654	-0.684	-0.002	-0.032		down	down
G5ECU5	CELE_F44E5.4	Uncharacterized protein	WBGene00009691;WBGene00009692	0.129	-0.031	0.099	-0.119	0.01
O16249	CELE_F44E7.4	Uncharacterized protein	WBGene00018426	-0.316	0.383	0.067	-0.003	-0.319	down	up			down
O16254	CELE_F44E7.9	Uncharacterized protein	WBGene00018431	0.429	0.043	0.472	-0.275	0.154	up		up
G5EFS5;Q9N5T2	CELE_F45D11.15	Uncharacterized protein	WBGene00018460;WBGene00018461	-0.966	-0.972	-1.938	0.027	-0.939	down	down	down		down
E1B6Q7	CELE_F45F2.9	5'-deoxynucleotidase HDDC2	WBGene00018481	0.563	0.065	0.628	-0.112	0.451	up		up		up
O62249	CELE_F45G2.7	Uncharacterized protein	WBGene00009733	-0.098	0.129	0.031	0.097	-0.001
O45525	CELE_F45H10.2	Cytochrome b-c1 complex subunit 8	WBGene00009739	0.37	-0.547	-0.176	0.203	0.573	up	down			up
O02267	CELE_F45H10.3	NADH dehydrogenase [ubiquinone] 1 alpha subcomplex subunit 7	WBGene00009740	0.089	-0.916	-0.827	0.179	0.268		down	down		up
Q20446	CELE_F46B6.4	Hflx-type G domain-containing protein	WBGene00009769	1.251	0.551	1.802	-0.243	1.009	up		up		up
Q20447	CELE_F46B6.6	Tr-type G domain-containing protein	WBGene00009771	0.71	0.072	0.783	-0.118	0.592	up		up		up
G5EFD7	CELE_F46C5.9	WD_REPEATS_REGION domain-containing protein	WBGene00009784	-0.076	0.06	-0.016	-0.064	-0.14
Q20476	CELE_F46G10.1	BTB domain-containing protein	WBGene00009796	-0.227	-0.013	-0.241	0.08	-0.147	down		down
H2L049	CELE_F46H5.7	Uncharacterized protein	WBGene00018522	-0.032	-0.199	-0.23	0.035	0.004		down	down
Q20505	CELE_F47B10.5	Uncharacterized protein	WBGene00009816	-0.11	0.087	-0.023	0.207	0.097
H2KZY5	CELE_F47B7.2	Sulfhydryl oxidase	WBGene00018533	-0.03	-0.122	-0.151	0.151	0.122
Q20521	CELE_F47B8.8	Peptidase_M1_N domain-containing protein	WBGene00009809	-0.186	0.164	-0.022	0.201	0.015
Q20538	CELE_F47E1.2	Solute carrier organic anion transporter family member	WBGene00018566	0.604	-0.382	0.223	-0.352	0.253	up	down
G4S7A1	CELE_F47G3.4	TIL domain-containing protein	WBGene00194641	0.214	-0.189	0.025	-0.003	0.211
O01572	CELE_F48C1.6	Uncharacterized protein	WBGene00018599	0.188	0.233	0.421	-0.205	-0.017	up	up	up
Q8MPU7	CELE_F48C1.9	Uncharacterized protein	WBGene00018601	0.114	-1.824	-1.71	-0.619	-0.505		down	down
Q20560	CELE_F48D6.4	Uncharacterized protein	WBGene00018602	-0.543	0.002	-0.542	0.103	-0.44	down		down
Q9GPA1	CELE_F48E3.4	Peptidase S1 domain-containing protein	WBGene00018605	0.27	-2.315	-2.045	-0.72	-0.449		down	down
Q09567	CELE_F48E8.3	FAD_binding_2 domain-containing protein	WBGene00018610	0.047	-0.106	-0.059	-0.382	-0.335
Q09396	CELE_F48E8.4	PRKCSH domain-containing protein	WBGene00018611	-0.003	-0.285	-0.288	-0.375	-0.378		down	down	down	down
Q20589	CELE_F49C12.12	Uncharacterized protein	WBGene00009881	-0.589	0.245	-0.344	0.793	0.204
Q27GQ6	CELE_F49C12.7	CHK domain-containing protein	WBGene00009877	-0.655	-0.198	-0.853	0.181	-0.474	down		down		down
P90879	CELE_F49C12.9	UBA domain-containing protein	WBGene00009878	0.225	-0.387	-0.162	-0.128	0.097	up	down
A7DT40	CELE_F49D11.10	Uncharacterized protein	WBGene00045433	1.341	-0.108	1.234	-0.034	1.307	up		up		up
A6ZJ46	CELE_F49E2.2	SH3 domain-containing protein	WBGene00009886	0.065	-0.133	-0.067	-0.125	-0.059
A0A4V0IKJ7	CELE_F49E2.5	Uncharacterized protein	WBGene00009888	0.45	-0.058	0.392	-0.022	0.428	up		up		up
Q20637	CELE_F52A8.1	Uncharacterized protein	WBGene00009915	-0.35	0.011	-0.339	0.438	0.088
Q9XUF0	CELE_F52B11.5	Uncharacterized protein	WBGene00009927	-0.482	-0.26	-0.741	-0.159	-0.641	down		down		down
Q20643	CELE_F52B5.2	Protein kinase domain-containing protein	WBGene00009921	-0.105	-0.085	-0.19	-0.057	-0.162
Q95X18	CELE_F52C12.2	18S rRNA aminocarboxypropyltransferase	WBGene00018679	1.166	-0.034	1.132	-0.138	1.028	up		up		up
B5WWL2	CELE_F52C12.6	Non-specific serine/threonine protein kinase	WBGene00138717	0.412	-0.042	0.37	0.173	0.585	up		up		up
Q20675	CELE_F52E4.5	Uncharacterized protein	WBGene00018702	-0.075	-0.101	-0.176	0.505	0.429				up	up
O62256	CELE_F52G2.3	RSD-2 domain-containing protein	WBGene00009943	-0.067	-0.159	-0.226	-0.072	-0.139			down
Q9GZI0	CELE_F52G3.1	BAT2_N domain-containing protein	WBGene00018710	-0.141	-0.107	-0.248	0.248	0.107
Q95QF1	CELE_F53B2.8	Uncharacterized protein	WBGene00009957	-0.558	-0.669	-1.227	0.18	-0.379			down
Q20711	CELE_F53B3.6	Uncharacterized protein	WBGene00018744	-0.055	0.241	0.186	0.125	0.07		up	up
P91321	CELE_F53E10.1	MOSC domain-containing protein	WBGene00018758	-0.425	0.197	-0.228	0.201	-0.225	down		down
P91997	CELE_F53F1.2	Aldo_ket_red domain-containing protein	WBGene00009980	-0.244	0.239	-0.005	0.331	0.087	down			up
P91998	CELE_F53F1.3	Aldo_ket_red domain-containing protein	WBGene00009981	0.059	0.189	0.248	0.099	0.158		up	up		up
Q20720	CELE_F53F4.11	Uncharacterized protein	WBGene00009993	2.074	-0.088	1.986	0.172	2.247	up		up		up
Q20724	CELE_F53F4.13	Uncharacterized protein	WBGene00009995	0.374	0.24	0.615	0.24	0.614			up		up
Q6BES8	CELE_F53F4.16	Uncharacterized protein	WBGene00023419	0.644	0.148	0.792	-0.238	0.406	up		up		up
O62261	CELE_F53F8.4	DB domain-containing protein	WBGene00010001	0.204	0.683	0.887	0.945	1.149			up		up
A0A2R8F5A8	CELE_F53G2.12	Complex1_LYR_dom domain-containing protein	WBGene00302998	0.068	0.275	0.343	0.277	0.345			up		up
O45074	CELE_F53H1.3	UDENN domain-containing protein	WBGene00018777	0.141	-0.298	-0.157	-0.179	-0.038		down
Q93778	CELE_F53H4.2	Uncharacterized protein	WBGene00010007	-0.534	-0.081	-0.614	0.031	-0.503	down		down		down
Q20734	CELE_F53H8.3	MFS domain-containing protein	WBGene00018779	0.089	-0.007	0.082	0.022	0.11
Q9N4J7	CELE_F54A3.2	Uncharacterized protein	WBGene00018781	-0.139	-0.191	-0.33	0.102	-0.037			down
H9G342	CELE_F54B8.4	Uncharacterized protein	WBGene00010019	-0.061	-0.162	-0.223	0.109	0.048
Q20753	CELE_F54C9.3	Uncharacterized protein	WBGene00010041	0.277	0.061	0.338	-0.214	0.062			up
Q20760	CELE_F54C9.9	Protein KRI1 homolog	WBGene00010044	0.355	-0.253	0.102	-0.182	0.172
G5EE46	CELE_F54D5.12	FAD-binding PCMH-type domain-containing protein	WBGene00010055	-0.257	0.862	0.604	0.075	-0.182	down	up	up
Q20769	CELE_F54D5.3	Uncharacterized protein	WBGene00010049	-1.541	0.362	-1.18	-0.198	-1.739	down		down		down
Q20770	CELE_F54D5.4	Uncharacterized protein	WBGene00010050	-0.673	1.332	0.66	0.207	-0.466		up
Q9TXK1	CELE_F54E2.1	Uncharacterized protein	WBGene00018823	-1.283	0.431	-0.852	0.196	-1.087	down	up	down		down
Q93786	CELE_F54E4.3	Uncharacterized protein	WBGene00010059	0.069	-0.18	-0.11	-0.176	-0.106
Q20789	CELE_F54F7.2	Uncharacterized protein	WBGene00010064	0.454	-1.693	-1.238	-0.971	-0.517		down	down	down
Q20790	CELE_F54F7.3	Uncharacterized protein	WBGene00010065	-1.597	0.223	-1.375	0.504	-1.094	down
A3FPK6	CELE_F54F7.9	Uncharacterized protein	WBGene00045251	0.449	-0.296	0.153	-1.658	-1.209				down	down
Q400L7	CELE_F54G2.1	Uncharacterized protein	WBGene00018837	0.168	-0.393	-0.224	-0.634	-0.466
G3MU11	CELE_F55A11.6	GST C-terminal domain-containing protein	WBGene00010079	0.053	-0.073	-0.02	-0.037	0.016
H2KYZ8	CELE_F55A12.2	Uncharacterized protein	WBGene00018863	0.362	0.227	0.59	-0.154	0.208	up		up
O17891	CELE_F55B11.2	Uncharacterized protein	WBGene00010084	-0.35	-0.157	-0.507	-0.151	-0.501	down		down		down
O17893	CELE_F55B11.3	Uncharacterized protein	WBGene00010085	-0.692	-0.327	-1.019	0.075	-0.617	down		down
O17890	CELE_F55B11.4	Uncharacterized protein	WBGene00010086	0.267	-0.379	-0.112	-0.029	0.238
Q7YX00	CELE_F55C10.5	Uncharacterized protein	WBGene00010109	-0.312	-0.174	-0.485	0.07	-0.242			down
H2L080	CELE_F55C12.5	SMP-LTD domain-containing protein	WBGene00018872	0.051	-0.199	-0.148	-0.395	-0.344				down	down
Q20830	CELE_F55D12.1	Uncharacterized protein	WBGene00010110	0.162	0.245	0.406	0.174	0.336			up
Q20833	CELE_F55D12.2	CRAL-TRIO domain-containing protein	WBGene00010111	-0.188	-0.036	-0.224	-0.135	-0.323					down
L8E6W9	CELE_F55F10.1	Midasin	WBGene00018898	0.114	-0.128	-0.014	-0.04	0.074
P91340	CELE_F55F8.2	RNA helicase	WBGene00018890	1.04	-0.145	0.896	0.034	1.075	up		up		up
Q9XUD8	CELE_F55G11.2	CUB_2 domain-containing protein	WBGene00010123	-0.952	1.886	0.934	-0.052	-1.004		up
G5EC22	CELE_F55G11.4	CUB_2 domain-containing protein	WBGene00010124	-2.277	1.455	-0.823	-0.806	-3.083	down				down
Q9XUD6	CELE_F55G11.8	CUB_2 domain-containing protein	WBGene00010128	-0.422	1.083	0.661	-0.637	-1.059		up			down
P90889	CELE_F55H12.4	Uncharacterized protein	WBGene00010135	1.473	0.063	1.536	-0.023	1.45	up		up		up
U4PC34	CELE_F56A11.5	MOSC domain-containing protein	WBGene00018925	-0.021	0.235	0.214	0.001	-0.019		up	up
Q95ZS5	CELE_F56A8.3	Uncharacterized protein	WBGene00010139	-0.142	0.151	0.009	0.064	-0.078
C0P287	CELE_F56A8.9	Uncharacterized protein	WBGene00185001	0.117	0.23	0.347	0.091	0.208			up
Q9TXR7	CELE_F56B3.11	Mitochondrial import inner membrane translocase subunit Tim21	WBGene00018934	0.668	0.377	1.045	-0.06	0.608	up	up	up		up
A0A486WY26	CELE_F56C9.10	Uncharacterized protein	WBGene00018953	0.162	-0.164	-0.002	0.094	0.257					up
Q20866	CELE_F56C9.8	Uncharacterized protein	WBGene00018952	-0.249	-0.152	-0.401	0.013	-0.236
Q20881	CELE_F56D5.6	Uncharacterized protein	WBGene00010150	-0.215	0.069	-0.146	-0.065	-0.28
Q9XUY0	CELE_F56G4.6	Uncharacterized protein	WBGene00010161	0.651	-0.238	0.413	0.263	0.914	up				up
O44734	CELE_F57B10.8	Uncharacterized protein	WBGene00019005	1.883	-0.177	1.706	0.118	2.001	up		up		up
O62265	CELE_F57C2.5	Str_synth domain-containing protein	WBGene00010197	-0.123	0.177	0.054	-0.188	-0.312		up			down
Q9XU92	CELE_F57G8.7	Uncharacterized protein	WBGene00010216	0.477	-0.38	0.097	1.453	1.929					up
O45097	CELE_F57H12.6	Uncharacterized protein	WBGene00019021	1.786	0.07	1.856	-0.787	0.999	up		up		up
Q20959	CELE_F58A6.1	Uncharacterized protein	WBGene00019022	-0.376	0.271	-0.105	0.003	-0.372	down	up			down
Q20969	CELE_F58B3.4	NUC153 domain-containing protein	WBGene00010231	1.191	0.02	1.211	0.23	1.421	up		up		up
Q20965	CELE_F58B3.6	Uncharacterized protein	WBGene00010232	0.245	-0.037	0.208	0.011	0.256	up		up		up
Q20974	CELE_F58B4.5	CHK domain-containing protein	WBGene00010238	-1.07	1.036	-0.034	-0.193	-1.263	down	up			down
Q336K8	CELE_F58B6.1	Lipase_3 domain-containing protein	WBGene00019029	-0.442	0.763	0.322	0.335	-0.106
Q20990	CELE_F58F9.3	Uncharacterized protein	WBGene00019057	0.017	-0.091	-0.074	-0.215	-0.197					down
O16281	CELE_F59A7.2	Uncharacterized protein	WBGene00019090	0.992	-1.12	-0.128	-0.482	0.51		down
Q8IA57	CELE_F59B1.10	CHK domain-containing protein	WBGene00019101	-0.351	-0.135	-0.486	0.645	0.294
O61880	CELE_F59B1.2	Uncharacterized protein	WBGene00019097	-0.548	0.156	-0.393	0.032	-0.516	down		down		down
O61882	CELE_F59B1.8	CHK domain-containing protein	WBGene00019100	-0.345	-0.207	-0.552	0.056	-0.289	down		down		down
Q93831	CELE_F59C6.5	NADH dehydrogenase [ubiquinone] 1 beta subcomplex subunit 10	WBGene00010326	0.125	-0.59	-0.466	0.15	0.274		down	down		up
G5EE63	CELE_F59D12.5	Uncharacterized protein	WBGene00010332	-0.26	0.057	-0.203	0.005	-0.254
O17902	CELE_H01G02.1	Uncharacterized protein	WBGene00010348	-0.088	0.507	0.418	0.424	0.336
G5EFE3	CELE_H03A11.2	Uncharacterized protein	WBGene00010357	-0.02	-0.218	-0.237	-0.181	-0.201		down	down		down
Q7YXH1	CELE_H06H21.8	CHK domain-containing protein	WBGene00019164	0.422	0.195	0.617	0.139	0.56	up		up		up
Q9N5N9	CELE_H06I04.3	Putative rRNA methyltransferase	WBGene00019168	2.076	-0.13	1.946	0.055	2.131	up		up		up
C7GIK1	CELE_H06I04.6	CX domain-containing protein	WBGene00019170	0.164	-0.263	-0.099	-0.193	-0.029
A0A5E4LZG5	CELE_H11E01.3	Uncharacterized protein	WBGene00019188	0.067	0.004	0.071	0.053	0.12
H2L0A6	CELE_H14E04.2	Uncharacterized protein	WBGene00019199	-0.219	-0.138	-0.357	-0.07	-0.289	down		down		down
H2L0B7	CELE_H14N18.4	Uncharacterized protein	WBGene00019204	-0.009	-0.076	-0.085	0.051	0.041
O61209;Q9N3I0	CELE_H17B01.2	Uncharacterized protein	WBGene00000646	-0.534	0.504	-0.031	0.758	0.224
Q2WF63	CELE_H20J04.4	RNA helicase	WBGene00019219	1.653	-0.273	1.379	-0.141	1.511	up		up		up
Q9XU17	CELE_H25K10.4	DUF4440 domain-containing protein	WBGene00010413	-0.883	-0.047	-0.93	0.478	-0.405	down		down
G5EBT9	CELE_H27A22.1	Glutaminyl-peptide cyclotransferase	WBGene00010418	-0.08	-0.094	-0.173	-0.11	-0.189
V6CJY2	CELE_H34C03.2	Ubiquitin carboxyl-terminal hydrolase	WBGene00019259	0.027	-0.138	-0.111	-0.112	-0.085		down	down
O76672	CELE_H34I24.2	Uncharacterized protein	WBGene00019261	-1.323	-0.059	-1.382	-0.392	-1.715	down		down		down
Q9TYZ4	CELE_H35B03.1	Uncharacterized protein	WBGene00019263	-0.384	-0.016	-0.4	0.174	-0.21	down		down	up	down
V6CJB4	CELE_H35B03.2	Uncharacterized protein	WBGene00019264	0.662	-0.068	0.594	-0.826	-0.164	up		up	down
Q564Q6	CELE_H39E23.3	Uncharacterized protein	WBGene00044201	-0.316	-1.319	-1.635	-0.685	-1.002		down	down
O45628	CELE_H40L08.1	Uncharacterized protein	WBGene00010433	-0.282	-0.074	-0.356	0.057	-0.225	down		down		down
O76634	CELE_H41C03.3	Uncharacterized protein	WBGene00019270	0.234	-0.34	-0.106	-0.155	0.079
Q9N5K0	CELE_H43E16.1	Uncharacterized protein	WBGene00019273	-0.828	-0.016	-0.844	0.406	-0.422	down		down
A0A168H995	CELE_H43I07.1	Uncharacterized protein	WBGene00019274	-0.02	0.21	0.19	-0.062	-0.082
Q9NAQ2	CELE_JC8.2	WD_REPEATS_REGION domain-containing protein	WBGene00010435	1.618	-0.003	1.615	0.03	1.648	up		up		up
Q9TZ58	CELE_K01A2.5	AB hydrolase-1 domain-containing protein	WBGene00019280	-0.212	-0.401	-0.613	-0.056	-0.268	down	down	down		down
Q21080	CELE_K01C8.1	Threonine ammonia-lyase	WBGene00010456	0.233	0.242	0.476	0.114	0.348			up		up
P90904	CELE_K02B12.7	Arf-GAP domain-containing protein	WBGene00010500	-0.069	0.03	-0.038	0.022	-0.047
O45637	CELE_K02B7.3	Uncharacterized protein	WBGene00010491	-0.46	-0.014	-0.474	0.27	-0.19	down		down
Q8I4H7	CELE_K02C4.5	Uncharacterized protein	WBGene00010503	-0.266	-0.507	-0.772	-0.746	-1.012			down		down
G5EG60	CELE_K02E2.7	Uncharacterized protein	WBGene00010508	-0.954	0.368	-0.586	1.004	0.05	down
O44983	CELE_K02F2.5	Uncharacterized protein	WBGene00019324	-1.015	0.423	-0.593	0.802	-0.214	down		down	up
Q21151	CELE_K02F3.9	Uncharacterized protein	WBGene00019332	0.008	-0.085	-0.077	0.068	0.076
Q21174	CELE_K03B4.1	Uncharacterized protein	WBGene00019353	-0.049	0.473	0.424	-0.108	-0.157		up	up
Q21173	CELE_K03B4.2	Uncharacterized protein	WBGene00019354	0.428	0.104	0.533	-0.273	0.155	up		up
Q21182	CELE_K03B8.6	Uncharacterized protein	WBGene00010524	-0.285	0.163	-0.123	0.166	-0.119
Q21176	CELE_K03B8.8	Uncharacterized protein	WBGene00010525	-0.246	-0.26	-0.506	-0.056	-0.301
Q94259	CELE_K04A8.1	Uncharacterized protein	WBGene00019373	-0.519	-0.018	-0.537	-0.188	-0.707	down		down		down
Q21210	CELE_K04C2.2	Uncharacterized protein	WBGene00019380	1.959	-0.127	1.832	0.1	2.059	up		up		up
Q9TXL3	CELE_K04F1.9	Uncharacterized protein	WBGene00019388	0.936	-0.429	0.507	-0.151	0.786	up
Q9XUU8	CELE_K05C4.5	Uncharacterized protein	WBGene00010582	0.659	-0.022	0.638	0.141	0.8	up		up		up
Q8IFX6	CELE_K06A9.1	Uncharacterized protein	WBGene00019435	-0.049	-0.214	-0.263	-0.113	-0.162			down
Q9XUT9	CELE_K06G5.1	VWFA domain-containing protein	WBGene00010605	-1.225	0.201	-1.024	-0.314	-1.539	down		down		down
P90915	CELE_K07A1.10	Growth arrest and DNA damage-inducible proteins-interacting protein 1	WBGene00010616	0.723	0.38	1.103	-0.117	0.606	up	up	up		up
P90919	CELE_K07A12.1	Uncharacterized protein	WBGene00010620	-0.11	-0.089	-0.199	-0.063	-0.173			down		down
Q21274	CELE_K07C5.2	Aldo_ket_red domain-containing protein	WBGene00010625	0.005	0.057	0.062	0.037	0.042
Q21288	CELE_K07E3.1	Uncharacterized protein	WBGene00019490	0.238	-0.148	0.09	-0.149	0.088
Q21284	CELE_K07E3.4	Formate--tetrahydrofolate ligase	WBGene00019492	-0.336	0.319	-0.017	0.12	-0.216	down	up		up	down
Q21298	CELE_K07F5.14	Uncharacterized protein	WBGene00010638	2.009	0.004	2.013	0.26	2.269	up		up		up
O45182	CELE_K07H8.2	Uncharacterized protein	WBGene00019504	0.567	-0.352	0.215	-0.181	0.386	up				up
Q21312	CELE_K08C7.1	Uncharacterized protein	WBGene00010646	0.445	-0.534	-0.088	-0.358	0.087		down
G5EBP0	CELE_K08C7.6	Uncharacterized protein	WBGene00010648	0.573	-1.065	-0.492	-0.835	-0.261	up	down	down	down
G5ECH9	CELE_K08D8.6	CUB_2 domain-containing protein	WBGene00010660	-0.48	0.208	-0.273	0.284	-0.196	down
Q21333	CELE_K08E4.2	GLTP domain-containing protein	WBGene00010666	-0.431	0.554	0.123	0.441	0.01
A8WHT8	CELE_K09A9.6	TPR_REGION domain-containing protein	WBGene00010703	0.018	-0.139	-0.121	0.101	0.119
D1MN81	CELE_K09A9.8	Uncharacterized protein	WBGene00194849	-0.325	-0.104	-0.428	0.786	0.461				up
Q21385;Q5WRR9	CELE_K09C4.1	MFS domain-containing protein	WBGene00019547	-0.95	0.581	-0.37	-0.546	-1.497	down				down
Q21392	CELE_K09E2.3	Uncharacterized protein	WBGene00019572	-0.231	-0.055	-0.286	0.154	-0.077	down		down
D9N147	CELE_K09G1.1	MARVEL domain-containing protein	WBGene00010727	0.033	0.189	0.222	0.264	0.297					up
E9P843	CELE_K10C2.12	Ubiquitin-like domain-containing protein	WBGene00206386	-0.099	0.52	0.421	0.272	0.173
O17944	CELE_K10C3.5	Tr-type G domain-containing protein	WBGene00010732	1.103	0.075	1.178	0.104	1.207	up		up		up
Q95X61	CELE_K11D12.11	BPTI/Kunitz inhibitor domain-containing protein	WBGene00019650	0.057	-0.104	-0.048	0.083	0.14
Q4R127	CELE_K11D12.13	BPTI/Kunitz inhibitor domain-containing protein	WBGene00044535	-0.073	0.507	0.434	0.307	0.234
O44622	CELE_K11D12.7	BPTI/Kunitz inhibitor domain-containing protein	WBGene00019647	0.317	-0.171	0.147	-0.065	0.252	up				up
G5EEI9	CELE_K11D9.3	MFS domain-containing protein	WBGene00010772	0.165	-0.376	-0.211	0.221	0.386
Q2L6V4	CELE_K11H12.11	Uncharacterized protein	WBGene00044723	-0.608	0.647	0.039	-0.427	-1.035					down
P91369	CELE_K11H12.4	Uncharacterized protein	WBGene00019660	-0.076	-0.098	-0.173	0.271	0.196
P91373	CELE_K11H12.8	Uncharacterized protein	WBGene00019664	-0.293	-0.002	-0.295	-0.355	-0.648					down
O44995	CELE_K12C11.1	AMP_N domain-containing protein	WBGene00019673	-0.106	0.164	0.059	-0.021	-0.126		up
A4V4W7	CELE_K12C11.7	Copper transport protein	WBGene00045053	-0.215	0.059	-0.155	0.709	0.495
Q9N5G9	CELE_K12H6.6	TLC domain-containing protein	WBGene00019686	0.165	-0.489	-0.324	-0.343	-0.178		down	down
H2KZB7	CELE_M01B12.4	Uncharacterized protein	WBGene00019697	0.088	-0.051	0.037	-0.016	0.072
Q21453	CELE_M01F1.4	Uncharacterized protein	WBGene00010810	-0.361	0.191	-0.17	0.123	-0.239	down	up	down		down
O62317	CELE_M01G12.9	Decapping nuclease	WBGene00010822	0.251	0.019	0.27	0.374	0.625			up	up	up
H2L0G8	CELE_M01H9.3	Uncharacterized protein	WBGene00019719	0.504	-0.14	0.364	0.125	0.629	up				up
Q21461	CELE_M02D8.3	Uncharacterized protein	WBGene00019729	-0.453	-0.034	-0.487	-0.102	-0.555
Q21464	CELE_M02D8.5	Uncharacterized protein	WBGene00019731	-0.218	-0.712	-0.93	-0.182	-0.4
A0A0K3AVS5	CELE_M02H5.8	Uncharacterized protein	WBGene00019744	1.009	-0.026	0.983	-0.314	0.695	up		up		up
A9Z1K7	CELE_M03A1.3	Cytochrome b561 domain-containing protein	WBGene00019746	0.209	-0.239	-0.03	-0.144	0.065
Q21503	CELE_M04B2.2	THUMP domain-containing protein	WBGene00010846	-0.216	0.14	-0.076	0.115	-0.101
Q21504	CELE_M04B2.4	DAO domain-containing protein	WBGene00010847	0.181	0.218	0.399	-0.027	0.154		up	up
G1K104;O62078	CELE_M04C3.2	SNF2_N domain-containing protein	WBGene00010851	-0.215	0.178	-0.037	0.035	-0.18	down
P90933	CELE_M04C9.3	Uncharacterized protein	WBGene00010858	-0.224	0.081	-0.143	0.056	-0.168
Q95Y96	CELE_M04F3.4	Uncharacterized protein	WBGene00019770	0.006	-0.17	-0.164	-0.064	-0.058
Q21515	CELE_M05B5.4	Uncharacterized protein	WBGene00010872	1.06	-0.783	0.277	-0.378	0.682	up	down	up	down	up
G5ECL1	CELE_M05D6.2	Uncharacterized protein	WBGene00010875	0.026	-0.021	0.005	0.037	0.064
Q21524	CELE_M05D6.5	HIG1 domain-containing protein	WBGene00010878	0.3	0.009	0.309	-0.362	-0.062	up		up	down
Q0G840	CELE_M106.3	Prostaglandin reductase 2	WBGene00010911	-0.983	0.171	-0.812	0.518	-0.465	down		down	up	down
A0A486WUL5	CELE_M142.5	AD domain-containing protein	WBGene00010922	0.027	-0.068	-0.041	0.004	0.032
Q86NF6	CELE_M176.11	Uncharacterized protein	WBGene00010947	0.062	-0.292	-0.23	-0.94	-0.878
Q21552	CELE_M176.4	Uncharacterized protein	WBGene00010943	-0.573	0.438	-0.135	-0.424	-0.997					down
Q21555	CELE_M18.3	Asparagine synthetase domain-containing protein	WBGene00010889	-0.138	0.193	0.055	0.953	0.815
Q21574	CELE_M28.8	Uncharacterized protein	WBGene00010899	0.193	-0.419	-0.225	-0.027	0.166
Q9TYY0	CELE_M57.2	Geranylgeranyl transferase type-2 subunit alpha	WBGene00019778	0.06	-0.036	0.024	0.063	0.123
H2KZR1	CELE_M60.4	Uncharacterized protein	WBGene00019780	0.356	-0.504	-0.148	0.177	0.533
Q21602	CELE_M88.4	PID domain-containing protein	WBGene00010907	0.011	-0.001	0.011	0.204	0.215
O61974	CELE_R01B10.3	SLC3A2_N domain-containing protein	WBGene00019805	-0.057	0.383	0.326	0.322	0.265
Q21622	CELE_R01H10.4	Uncharacterized protein	WBGene00010972	-0.261	0.328	0.067	0.166	-0.095
Q21623	CELE_R01H10.7	Inositol polyphosphate-4-phosphatase	WBGene00010975	-0.08	-0.092	-0.172	-0.068	-0.148
Q7KPV8	CELE_R02C2.7	DUF4440 domain-containing protein	WBGene00019818	-0.293	-0.589	-0.882	-0.246	-0.539		down	down		down
U4PSC5	CELE_R02D1.2	Uncharacterized protein	WBGene00235310	-0.322	0.704	0.382	0.549	0.227		up
Q5ZR77	CELE_R02F11.3	ZT_dimer domain-containing protein	WBGene00019841	-0.225	-0.223	-0.447	0.16	-0.065	down	down	down
Q21649	CELE_R02F2.7	Uncharacterized protein	WBGene00019836	1.688	-0.076	1.612	0.011	1.699	up		up		up
Q95QC2	CELE_R02F2.9	RF_PROK_I domain-containing protein	WBGene00019838	0.475	0.686	1.161	0.172	0.647	up	up	up		up
Q21662	CELE_R03E9.2	Glyco_hydro_63 domain-containing protein	WBGene00019843	0.906	-0.251	0.655	-0.152	0.754	up	down	up		up
Q9GYL7	CELE_R03H10.1	Uncharacterized protein	WBGene00019854	-0.482	-0.114	-0.596	0.219	-0.263	down		down		down
Q21702	CELE_R04B5.5	Sorbitol dehydrogenase	WBGene00011003	0.001	-0.003	-0.002	0.223	0.224				up	up
Q21732	CELE_R04F11.2	ATP synthase subunit e, mitochondrial	WBGene00011015	0.098	-0.418	-0.321	0.082	0.18		down	down
Q8WQD7	CELE_R04F11.5	Uncharacterized protein	WBGene00011017	0.538	0.61	1.148	0.185	0.722	up	up	up		up
Q9N5G4	CELE_R05D8.7	Uncharacterized protein	WBGene00019885	1.064	-0.552	0.512	0.316	1.379	up				up
Q9N5G2	CELE_R05D8.9	Uncharacterized protein	WBGene00019886	-0.092	0.766	0.674	0.757	0.664		up	up
Q21742	CELE_R05F9.6	Phosphoglucomutase (alpha-D-glucose-1,6-bisphosphate-dependent)	WBGene00019890	-0.394	0.17	-0.223	0.125	-0.269	down	up	down		down
Q21763	CELE_R05H5.3	Thioredoxin domain-containing protein	WBGene00011038	-0.032	-0.192	-0.223	-0.023	-0.054
O62337	CELE_R06C1.4	RRM domain-containing protein	WBGene00011059	-0.193	0.158	-0.035	0.324	0.131
Q21800	CELE_R07B7.10	Uncharacterized protein	WBGene00011094	1.156	-0.666	0.49	0.27	1.426	up				up
Q21799	CELE_R07B7.8	Lipase_GDSL domain-containing protein	WBGene00011092	-0.057	-0.094	-0.151	0.065	0.008
Q21798	CELE_R07B7.9	Lipase_GDSL domain-containing protein	WBGene00011093	-0.018	-0.043	-0.061	-0.403	-0.421
Q21810	CELE_R07E3.1	Uncharacterized protein	WBGene00011102	-0.078	0.021	-0.057	0.063	-0.015
Q21817	CELE_R07E4.3	Cytochrome b-c1 complex subunit 8	WBGene00019937	0.127	-0.519	-0.392	0.506	0.633		down	down	up	up
Q9XVW5	CELE_R08B4.3	Protein yippee-like	WBGene00011139	0.13	-0.021	0.109	-0.187	-0.058
Q21850	CELE_R08E3.1	Uncharacterized protein	WBGene00019957	-1.06	0.115	-0.945	-0.273	-1.333	down		down		down
O01593	CELE_R08E5.3	Methyltranfer_dom domain-containing protein	WBGene00019963	-0.036	0.905	0.869	-0.012	-0.049		up	up
O01893	CELE_R08F11.1	Non-lysosomal glucosylceramidase	WBGene00019965	-0.468	0.155	-0.313	0.073	-0.395	down		down		down
O61933	CELE_R09A1.3	Uncharacterized protein	WBGene00019973	-0.29	-0.44	-0.73	0.038	-0.252	down	down	down		down
Q4R148	CELE_R09E12.9	DUF4440 domain-containing protein	WBGene00044514	-0.106	0.536	0.43	0.183	0.077
Q23030	CELE_R09F10.1	Uncharacterized protein	WBGene00019986	0.394	0.013	0.408	0.159	0.553			up		up
Q23028	CELE_R09F10.5	Uncharacterized protein	WBGene00019988	0.306	-0.348	-0.042	-0.144	0.162
Q21884	CELE_R09H10.5	Uncharacterized protein	WBGene00011182	-0.167	-0.126	-0.292	-0.096	-0.263			down		down
Q21888	CELE_R102.2	DUF4440 domain-containing protein	WBGene00011289	-0.69	-0.083	-0.773	-0.037	-0.727	down		down		down
Q21899	CELE_R10E4.1	BTB domain-containing protein	WBGene00011198	-0.109	-0.21	-0.319	-0.075	-0.183			down
Q21916	CELE_R10H10.3	Uncharacterized protein	WBGene00011222	-0.229	0.815	0.586	-0.681	-0.909					down
O61710	CELE_R119.2	AMP_N domain-containing protein	WBGene00020088	0.089	0.459	0.548	0.062	0.151		up	up
O61709	CELE_R119.3	Uncharacterized protein	WBGene00020089	0.613	0.403	1.016	0.004	0.617	up	up	up		up
Q21932	CELE_R11D1.3	Uncharacterized protein	WBGene00011244	0.261	-0.22	0.041	0.139	0.4
H2KYE1	CELE_R11G1.6	Uncharacterized protein	WBGene00020012	0.187	-0.176	0.012	-0.02	0.168	up				up
O18002	CELE_R11H6.4	Uncharacterized protein	WBGene00011252	-0.395	-0.184	-0.579	0.199	-0.196
Q21959	CELE_R12C12.5	Uncharacterized protein	WBGene00020025	0.015	-0.038	-0.023	-0.119	-0.104
Q21956	CELE_R12C12.9	Uncharacterized protein	WBGene00020029	-0.225	0.284	0.06	0.312	0.088
O61793	CELE_R12E2.13	Uncharacterized protein	WBGene00020038	-0.103	-0.007	-0.11	-0.068	-0.171
Q95Y87	CELE_R13A5.10	CMP/dCMP-type deaminase domain-containing protein	WBGene00020052	0.041	0.11	0.151	0.196	0.237					up
F0IWS9	CELE_R13D11.4	N-acetyltransferase domain-containing protein	WBGene00020058	-0.201	0.046	-0.155	0.004	-0.196	down
A5Z2W3	CELE_R13H4.2	Uncharacterized protein	WBGene00014826	-0.208	-0.073	-0.281	-0.03	-0.238	down		down		down
Q95QB7	CELE_R144.11	Uncharacterized protein	WBGene00020099	0.135	0.197	0.332	-0.081	0.054		up	up
Q304F0	CELE_R144.13	Polyketide_cyc domain-containing protein	WBGene00044648	0.553	-0.1	0.453	-0.803	-0.25
Q8ITY8	CELE_R148.3	Uncharacterized protein	WBGene00020102	-0.014	-0.156	-0.17	-0.073	-0.087		down	down
H2KZA6	CELE_R148.5	PID domain-containing protein	WBGene00020104	-0.243	0.062	-0.181	0.225	-0.019
Q6AHR3	CELE_R151.2	Ribose-phosphate diphosphokinase	WBGene00020107	-0.306	-0.128	-0.434	-0.031	-0.337	down		down		down
Q22003	CELE_R166.2	Uncharacterized protein	WBGene00011302	0.229	0.24	0.469	0.026	0.255	up	up	up		up
Q22013	CELE_R186.3	Signal recognition particle receptor subunit beta	WBGene00011306	-0.206	0.23	0.024	0.132	-0.074	down	up
Q7YTL0	CELE_R186.8	Uncharacterized protein	WBGene00011309	0.393	0.57	0.963	0.182	0.575		up	up		up
Q9N5F6	CELE_R193.2	Uncharacterized protein	WBGene00020128	-0.039	-0.422	-0.461	-0.239	-0.277
Q22015	CELE_R31.2	ANK_REP_REGION domain-containing protein	WBGene00011270	-0.001	0.203	0.202	0.138	0.137
Q22020	CELE_R53.5	Peroxiredoxin-like 2A	WBGene00011274	-0.087	0.183	0.096	-0.003	-0.09		up
Q22046	CELE_T01B7.5	Sas10 domain-containing protein	WBGene00011311	1.704	-0.225	1.479	0.104	1.807	up		up		up
Q22056	CELE_T01C3.2	Transcription and mRNA export factor ENY2	WBGene00011319	0.22	-0.03	0.19	0.057	0.277
Q22065	CELE_T01C8.2	Uncharacterized protein	WBGene00020143	0.275	0.147	0.422	0.286	0.561	up		up	up	up
G5EDT4	CELE_T01D3.6	Uncharacterized protein	WBGene00011330	-0.945	0.33	-0.615	-0.242	-1.187	down		down		down
Q7YWV0	CELE_T01E8.8	Uncharacterized protein	WBGene00011335	0.267	-0.228	0.039	-0.547	-0.28				down
O18008	CELE_T01G5.1	Protein kinase domain-containing protein	WBGene00011339	0.295	0.226	0.52	0.562	0.857					up
Q22088	CELE_T01H3.2	Uncharacterized protein	WBGene00011348	0.158	-0.013	0.145	-0.161	-0.002
Q22089	CELE_T01H3.3	Uncharacterized protein	WBGene00011349	-0.257	0.121	-0.136	0.503	0.246
G5ECA7	CELE_T02D1.8	DUF4440 domain-containing protein	WBGene00011374	-0.314	0.067	-0.247	0.18	-0.135	down		down
Q22101	CELE_T02G5.7	Uncharacterized protein	WBGene00020166	-0.381	0.192	-0.189	0.17	-0.211	down	up	down	up	down
A9D0C6	CELE_T02H6.1	WD_REPEATS_REGION domain-containing protein	WBGene00020171	1.507	-0.093	1.414	0.033	1.541	up		up		up
Q9N5E4	CELE_T02H6.11	Cytochrome b-c1 complex subunit 7	WBGene00020181	0.362	-0.517	-0.154	0.258	0.62	up	down		up	up
B5BM47	CELE_T03D8.6	Uncharacterized protein	WBGene00011393	0.619	0.171	0.79	0.055	0.674	up		up		up
P91423	CELE_T03F1.11	Uncharacterized protein	WBGene00020192	-0.259	0.072	-0.187	0.105	-0.154	down		down
Q8I4G3	CELE_T03F7.7	CRAL-TRIO domain-containing protein	WBGene00011404	-0.02	0.216	0.196	-0.064	-0.084
Q22129	CELE_T03G6.3	Uncharacterized protein	WBGene00020195	-0.081	-0.071	-0.152	-0.019	-0.1			down
G5EG50	CELE_T04A11.1	Uncharacterized protein	WBGene00011416;WBGene00011419	-1.699	0.295	-1.404	0.244	-1.455	down	up	down	up	down
G5ECB5	CELE_T04A11.2	Uncharacterized protein	WBGene00011417;WBGene00011420	-0.371	0.062	-0.309	0.251	-0.119	down		down
Q22137	CELE_T04A8.7	1,4-alpha-glucan branching enzyme	WBGene00011409	-0.053	0.038	-0.015	0.083	0.03
O44846	CELE_T04B8.5	Uncharacterized protein	WBGene00020207	0.149	0.016	0.165	-0.176	-0.026	up		up	down
F5GUG4	CELE_T04C12.11	Uncharacterized protein	WBGene00077693	-0.129	0.098	-0.031	0.083	-0.046
H2KZV6	CELE_T04C9.1	Uncharacterized protein	WBGene00020209	-0.156	-0.221	-0.377	0.037	-0.119		down	down
G5EE32	CELE_T04F3.1	Aminotran_1_2 domain-containing protein	WBGene00011436	-0.051	-0.113	-0.164	0.009	-0.042		down	down
Q22159	CELE_T04F3.4	Uncharacterized protein	WBGene00011439	-0.134	0.001	-0.134	0.116	-0.018
Q22171	CELE_T04G9.4	L-aminoadipate-semialdehyde dehydrogenase-phosphopantetheinyl transferase	WBGene00020215	-0.1	-0.17	-0.27	0.031	-0.069		down	down
Q9TXQ6	CELE_T04G9.7	Uncharacterized protein	WBGene00020218	-0.271	-2.556	-2.827	-1.06	-1.331		down	down		down
Q22207	CELE_T05A7.1	Uncharacterized protein	WBGene00020219	-0.625	-0.175	-0.8	0.027	-0.598	down		down		down
H2KZ05	CELE_T05C3.6	Uncharacterized protein	WBGene00020256	0.295	0.27	0.565	-0.134	0.161			up
Q9XUR6	CELE_T05E12.3	BTB domain-containing protein	WBGene00011486	0.202	-0.672	-0.469	-0.273	-0.07		down	down
O01858	CELE_T05E7.3	Uncharacterized protein	WBGene00020259	-0.017	-0.116	-0.133	-0.336	-0.353
Q22240	CELE_T05H10.1	Ubiquitin carboxyl-terminal hydrolase 47	WBGene00011507	-0.076	-0.018	-0.094	0.096	0.02
O16515	CELE_T05H4.10	NopRA1 domain-containing protein	WBGene00020273	1.732	-0.081	1.651	0.053	1.785	up		up		up
Q22254	CELE_T06D8.9	Store-operated calcium entry-associated regulatory factor	WBGene00011529	-0.31	0.242	-0.068	0.172	-0.138
O45757	CELE_T06E6.1	Uncharacterized protein	WBGene00011538	2.917	-0.09	2.827	0.055	2.972	up		up		up
O44412	CELE_T07A9.10	Uncharacterized protein	WBGene00020298	-0.111	-0.205	-0.316	-0.052	-0.163		down	down
O16725	CELE_T07D3.9	Uncharacterized protein	WBGene00020311	0.197	0.803	1	-0.064	0.134		up	up
Q22312	CELE_T07E3.3	Uncharacterized protein	WBGene00020314	0.134	-0.203	-0.069	-0.096	0.038
Q22322	CELE_T07F12.2	Uncharacterized protein	WBGene00020322	0.023	-0.382	-0.359	-0.042	-0.019		down	down
A0A0K3AVV4	CELE_T08B1.1	MFS domain-containing protein	WBGene00020340	0.117	0.221	0.338	0.031	0.148			up
G5EGD7	CELE_T08B1.4	Lipase_3 domain-containing protein	WBGene00020341	0.02	-0.148	-0.128	0.057	0.077
Q94010	CELE_T08G11.1	Uncharacterized protein	WBGene00011629	-0.253	-0.112	-0.365	0.01	-0.243	down	down	down		down
Q7YTK7	CELE_T09A5.15	Uncharacterized protein	WBGene00011641	-0.477	0.212	-0.265	0.426	-0.051	down
O02155	CELE_T09B4.5	Uncharacterized protein	WBGene00020379	-0.392	0.102	-0.291	0.152	-0.24
O02158	CELE_T09B4.8	Uncharacterized protein	WBGene00020382	0.554	0.049	0.603	-0.003	0.55	up		up		up
G5EEG6	CELE_T09F3.2	Carrier protein (C2)	WBGene00011662	-0.56	0.107	-0.453	0.226	-0.334	down		down		down
Q22368	CELE_T10B10.3	Uncharacterized protein	WBGene00011680	0.094	-0.17	-0.077	-0.146	-0.053
Q9TZH8	CELE_T10B11.6	Uncharacterized protein	WBGene00020402	0.061	0.16	0.221	-0.17	-0.109		up	up	down
O76407	CELE_T10B5.3	Utp12 domain-containing protein	WBGene00020389	1.939	-0.073	1.866	0.111	2.05	up		up		up
O76409	CELE_T10B5.7	Lipase_3 domain-containing protein	WBGene00020393	-0.181	0.088	-0.092	-0.08	-0.261
O76410	CELE_T10B5.8	Oxidored_FMN domain-containing protein	WBGene00020394	-0.689	-0.072	-0.761	0.153	-0.536	down		down		down
H2FLL7	CELE_T10C6.6	MFS domain-containing protein	WBGene00011688	0.845	-0.129	0.716	-0.648	0.197	up		up
Q10050	CELE_T10F2.2	Uncharacterized protein	WBGene00020422	0.543	-0.023	0.52	-0.229	0.314	up		up		up
G4SNB8	CELE_T10F2.5	Trafficking protein particle complex subunit 2-like protein	WBGene00044604	-0.135	-0.105	-0.24	-0.071	-0.206
P92020	CELE_T10G3.3	Uncharacterized protein	WBGene00011694	-0.278	-0.415	-0.693	-0.205	-0.483	down	down	down		down
P91442	CELE_T10H10.2	Sulfhydryl oxidase	WBGene00020426	0.303	-0.492	-0.188	-0.375	-0.072	up	down	down	down
Q1XFY4	CELE_T10H9.8	EF-hand domain-containing protein	WBGene00044779	-0.545	-0.078	-0.623	0.317	-0.228	down		down
Q22390	CELE_T11B7.5	Uncharacterized protein	WBGene00011708	0.484	-0.139	0.345	-0.03	0.454
Q9UAW9	CELE_T12B3.2	MFS domain-containing protein	WBGene00020445	0.157	0.156	0.313	0.187	0.344			up		up
Q9UAW8	CELE_T12B3.3	GP-PDE domain-containing protein	WBGene00020446	-0.139	0.457	0.318	0.174	0.035		up	up
Q69ZI6	CELE_T12D8.10	Uncharacterized protein	WBGene00023450	-0.143	-0.123	-0.265	-0.231	-0.373			down		down
O45783	CELE_T12D8.5	Uncharacterized protein	WBGene00011733	0.107	-1.613	-1.505	-0.082	0.025		down	down
G5EFT0	CELE_T12D8.9	Uncharacterized protein	WBGene00011736	-0.179	-0.127	-0.306	0.132	-0.047	down		down
Q22437	CELE_T12G3.4	Adipocyte plasma membrane-associated protein	WBGene00011739	-0.197	0.348	0.151	0.073	-0.124		up
Q965L2	CELE_T13B5.9	Uncharacterized protein	WBGene00020476	-0.291	-0.421	-0.712	-0.135	-0.426
Q7JP80	CELE_T13C2.6	EGF-like domain-containing protein	WBGene00020481	0.174	-0.492	-0.319	-0.306	-0.132		down	down	down
O18089	CELE_T13F3.6	DUF19 domain-containing protein	WBGene00011753	0.531	0.917	1.448	0.877	1.408	up	up	up	up	up
Q966F6	CELE_T13G4.4	Hcy-binding domain-containing protein	WBGene00020491	-0.313	-0.077	-0.39	-0.093	-0.406	down		down		down
Q95QB1	CELE_T13H5.8	Cleft lip and palate transmembrane protein 1-like protein	WBGene00011761	0.211	0.2	0.411	-0.01	0.202	up	up	up		up
Q22484	CELE_T14B4.1	SpoU_methylase domain-containing protein	WBGene00020498	1.128	0.044	1.172	0.106	1.233	up		up		up
Q22515	CELE_T14G8.3	Uncharacterized protein	WBGene00011771	-0.263	0.036	-0.228	0.029	-0.234	down		down		down
G4SJU0	CELE_T15B12.1	Calponin-homology (CH) domain-containing protein	WBGene00020530	0.094	-0.175	-0.081	-0.051	0.043
Q5ZR75	CELE_T15B7.1	Uncharacterized protein	WBGene00020516	-0.631	1.01	0.378	-0.331	-0.962		up			down
Q9U368	CELE_T16G1.7	CHK domain-containing protein	WBGene00011801	-0.496	-0.252	-0.748	-0.163	-0.659			down		down
Q9U367	CELE_T16G1.9	ANK_REP_REGION domain-containing protein	WBGene00011802	-0.021	-0.13	-0.151	-0.048	-0.069			down
Q22562	CELE_T19B10.2	Uncharacterized protein	WBGene00011831	1.154	-0.678	0.476	-0.399	0.755	up	down	up		up
Q22579	CELE_T19D12.1	Uncharacterized protein	WBGene00020576	0.135	-0.298	-0.163	-0.278	-0.142
O76836	CELE_T19D12.4	VWFA domain-containing protein	WBGene00020579	0.298	-0.058	0.239	-0.157	0.141
Q22574	CELE_T19D12.6	Uncharacterized protein	WBGene00020581	0.285	-0.797	-0.512	-0.473	-0.188		down	down
A0A486WVT5	CELE_T20B3.1	Carn_acyltransf domain-containing protein	WBGene00011850	0.005	0.051	0.055	-0.172	-0.168
C6KRJ5	CELE_T20D3.14	Uncharacterized protein	WBGene00303026	0.632	0.229	0.861	-0.119	0.513			up
O01257	CELE_T20D3.6	HIG1 domain-containing protein	WBGene00011859	0.045	-0.396	-0.351	0.124	0.168		down	down
P91464	CELE_T20D4.11	DUF19 domain-containing protein	WBGene00020617	1.103	-0.057	1.046	0.441	1.544	up		up		up
P91468	CELE_T20D4.7	Thioredoxin domain-containing protein	WBGene00020613	0.516	0.715	1.231	0.652	1.168		up	up		up
O18092	CELE_T20F10.2	Uncharacterized protein	WBGene00011864	-0.063	-0.009	-0.072	-0.052	-0.115
Q22615	CELE_T20G5.9	Partner of Y14 and mago	WBGene00011871	-0.256	-0.215	-0.471	-0.097	-0.353	down		down		down
Q22624	CELE_T21B10.3	Uncharacterized protein	WBGene00011885	0.058	0.324	0.382	0.122	0.179
Q22631	CELE_T21B6.3	Apple domain-containing protein	WBGene00011880	-0.292	0.159	-0.133	0.445	0.153	down			up
Q22649	CELE_T21C9.6	Uncharacterized protein	WBGene00011893	-0.038	-0.128	-0.166	-0.062	-0.1
H2KZV5	CELE_T21H3.1	Lipase_3 domain-containing protein	WBGene00020662	-1.138	1.723	0.585	0.362	-0.776	down	up			down
Q23044	CELE_T22B7.7	HotDog ACOT-type domain-containing protein	WBGene00020674	-1.745	0.411	-1.334	-0.277	-2.023	down	up	down		down
Q22666	CELE_T22C1.6	Uncharacterized protein	WBGene00011917	-0.043	0.053	0.011	0.145	0.103
Q22684	CELE_T22E5.6	Uncharacterized protein	WBGene00020692	0.336	-0.409	-0.073	-0.407	-0.071
Q8MNX1	CELE_T22H9.1	rRNA biogenesis protein RRP36	WBGene00020705	0.295	-0.134	0.162	-0.103	0.192
Q4R139	CELE_T23B12.11	Uncharacterized protein	WBGene00044553	0.098	-0.259	-0.161	-0.358	-0.26
P91491	CELE_T23B3.2	Uncharacterized protein	WBGene00020710	-0.125	-0.306	-0.431	0.081	-0.045			down
H2KZS2	CELE_T23E7.2	Uncharacterized protein	WBGene00020732	0.076	0.062	0.138	0.107	0.183					up
Q7YWS5	CELE_T23F11.6	DB domain-containing protein	WBGene00011957	-0.6	-0.19	-0.79	-0.306	-0.905
A0A0S4XRI4	CELE_T23F4.2	Uncharacterized protein	WBGene00020740	-0.305	-0.249	-0.555	0.139	-0.166	down		down
B2MZC4	CELE_T23G11.11	Uncharacterized protein	WBGene00077728	0.164	0	0.164	-0.199	-0.035
Q22705	CELE_T23G7.3	G-patch domain-containing protein	WBGene00011966	2.742	-0.327	2.414	-0.638	2.103	up		up		up
Q965J1	CELE_T24A6.20	Acetyltransf_18 domain-containing protein	WBGene00020756	0.007	0.011	0.018	-0.065	-0.058
Q22719	CELE_T24B8.3	Uncharacterized protein	WBGene00011977	-0.091	0.01	-0.081	0.172	0.081
Q22715	CELE_T24B8.4	Uncharacterized protein	WBGene00011978	-0.223	-0.185	-0.408	-0.19	-0.413	down		down		down
Q22721	CELE_T24C12.3	PfkB domain-containing protein	WBGene00020765	-0.039	0.384	0.346	-0.003	-0.042		up	up
Q965K6	CELE_T24E12.5	Uncharacterized protein	WBGene00020774	-0.072	-0.498	-0.57	-0.036	-0.107
Q22750	CELE_T24H10.4	Uncharacterized protein	WBGene00012002	0.082	-0.225	-0.144	-0.533	-0.452				down	down
Q22758	CELE_T24H7.2	Uncharacterized protein	WBGene00020781	-0.029	-0.075	-0.103	-0.105	-0.134
Q7JPE4	CELE_T24H7.9	GyrI-like domain-containing protein	WBGene00305157	-0.577	0.183	-0.394	0.335	-0.242	down		down	up	down
H2KZ74	CELE_T25B2.2	Uncharacterized protein	WBGene00020786	-0.284	-0.112	-0.397	-0.112	-0.396	down		down		down
Q22768	CELE_T25B9.1	Aminotran_1_2 domain-containing protein	WBGene00012007	-0.093	0.467	0.375	0.027	-0.065		up	up
G5ECR0	CELE_T25C12.3	Uncharacterized protein	WBGene00012018	0.118	-0.188	-0.07	-0.254	-0.136
Q965I8	CELE_T25D3.3	PALP domain-containing protein	WBGene00020797	-0.078	0.286	0.208	0.189	0.111		up
Q22783	CELE_T25G12.6	Uncharacterized protein	WBGene00020813	-0.016	-0.315	-0.331	-0.166	-0.182		down	down
Q22790	CELE_T25G3.1	DUF4604 domain-containing protein	WBGene00012029	0.211	0.202	0.413	0.245	0.457
Q22792	CELE_T25G3.3	60S ribosomal export protein NMD3	WBGene00012030	1.532	-0.189	1.343	-0.062	1.47	up		up		up
Q22794	CELE_T26A5.6	UDENN domain-containing protein	WBGene00020822	-0.183	0.073	-0.11	0.134	-0.049
Q22805	CELE_T26A8.4	Uncharacterized protein	WBGene00020827	0.25	-0.168	0.082	0.013	0.262
Q22816	CELE_T26C5.3	Uncharacterized protein	WBGene00012033	0.547	-0.139	0.408	-0.225	0.322
O18131	CELE_T26E3.4	RWD domain-containing protein	WBGene00012037	0.388	0.056	0.443	0.187	0.575	up		up		up
O45864	CELE_T27E9.2	Cytochrome b-c1 complex subunit 6	WBGene00012094	0.48	0.48	0.96	-0.157	0.323	up	up	up		up
Q6A590	CELE_T28B4.1	F-box domain-containing protein	WBGene00020884	-0.074	-0.243	-0.317	0.074	0
X5M5W2	CELE_T28C6.7	Uncharacterized protein	WBGene00012121	0.059	-0.09	-0.031	-0.214	-0.155				down	down
Q9XVW9	CELE_T28C6.8	Brain protein I3	WBGene00012122	-1.119	-0.35	-1.47	0.713	-0.407			down
O18156	CELE_T28D6.3	Uncharacterized protein	WBGene00012123	-1.415	-0.721	-2.136	0.343	-1.072	down	down	down		down
I2HAF0	CELE_T28D6.5	Uncharacterized protein	WBGene00012125	0.276	-0.292	-0.016	-0.293	-0.017
G5EGL2	CELE_T28D6.6	OBG-type G domain-containing protein	WBGene00012126	0.363	0.107	0.469	0.102	0.465	up		up		up
Q22850	CELE_T28F4.5	Uncharacterized protein	WBGene00012140	0.227	0.049	0.276	0.047	0.274
Q22857	CELE_T28H10.2	ShKT domain-containing protein	WBGene00012143	0.776	0.37	1.147	-0.145	0.631	up		up		up
Q9TYU4	CELE_VC5.2	Laminin EGF-like domain-containing protein	WBGene00020908	0.038	-0.08	-0.042	0.032	0.07
G5EDW8	CELE_VF13D12L.3	Uncharacterized protein	WBGene00012149	-0.182	0.493	0.311	0.259	0.077	down	up	up	up
Q23068	CELE_W01A11.1	Epoxide hydrolase	WBGene00020909	-0.48	0.457	-0.023	0.149	-0.331	down	up			down
O45017	CELE_W01B11.6	Thioredoxin domain-containing protein	WBGene00020917	-1.37	-0.273	-1.642	0.595	-0.775	down		down	up	down
O62388;P49622	CELE_W01D2.1	Ribosomal protein L37;60S ribosomal protein L37	WBGene00012179	0.156	0.278	0.434	0.07	0.227			up
O62390	CELE_W01F3.2	Uncharacterized protein	WBGene00012185	0.835	0.129	0.964	0.056	0.891	up		up		up
G5EGR8	CELE_W02A11.1	tRNA (adenine(58)-N(1))-methyltransferase catalytic subunit TRMT61A	WBGene00012192	1.442	-0.18	1.261	0.009	1.45	up		up		up
Q23119	CELE_W02B12.1	Lipase_GDSL domain-containing protein	WBGene00012201	-0.971	0.57	-0.401	-0.574	-1.546	down				down
Q8MQG6	CELE_W02D3.12	Succinate dehydrogenase assembly factor 4, mitochondrial	WBGene00020937	0.134	0.16	0.294	-0.289	-0.155			up
O01810	CELE_W02D3.4	Uncharacterized protein	WBGene00020933	0.388	0.055	0.443	-0.095	0.293
O17525	CELE_W02D7.4	Uncharacterized protein	WBGene00020940	-0.719	0.49	-0.229	0.389	-0.33	down	up
O17526	CELE_W02D7.5	Uncharacterized protein	WBGene00020941	-0.041	0.232	0.191	-0.037	-0.078
C6KRN3	CELE_W02D9.2	Protein YIPF	WBGene00012208	0.032	-0.401	-0.37	-0.146	-0.115		down	down
Q9N5C4	CELE_W02H5.8	Triokinase/FMN cyclase	WBGene00020962	-0.116	0.124	0.008	0.123	0.006
O44566	CELE_W03F8.4	Uncharacterized protein	WBGene00020994	-0.058	-0.113	-0.171	0.262	0.204			down	up	up
H2KZL0	CELE_W04B5.3	Galectin domain-containing protein	WBGene00021020	-0.208	-0.095	-0.303	-0.017	-0.224	down		down		down
Q9UA62	CELE_W04B5.5	Protein kinase domain-containing protein	WBGene00021022	-0.068	-0.192	-0.261	-0.222	-0.29
Q9TZE0	CELE_W04C9.2	MICOS complex subunit MIC13	WBGene00021024	-0.424	0.052	-0.372	0.005	-0.419	down		down		down
Q9TZE4	CELE_W04C9.4	Uncharacterized protein	WBGene00021026	2.331	-0.074	2.257	0.062	2.393	up		up		up
G5EE34	CELE_W04E12.7	Uncharacterized protein	WBGene00012252	-0.155	-0.143	-0.298	0.054	-0.1
Q23166	CELE_W04G3.5	Pribosyltran_N domain-containing protein	WBGene00012258	-0.264	-0.025	-0.289	0.023	-0.241	down		down		down
F5GUH2	CELE_W05B5.1	Uncharacterized protein	WBGene00012274	-0.319	-0.339	-0.658	0.171	-0.148	down	down	down
Q23173	CELE_W05E10.1	MFS domain-containing protein	WBGene00012280	-0.037	0.047	0.01	0.28	0.243
Q23179	CELE_W05H9.1	Uncharacterized protein	WBGene00021048	-0.815	-0.182	-0.996	-0.015	-0.83	down		down		down
Q23186	CELE_W06A7.2	Uncharacterized protein	WBGene00012291	-0.159	-0.199	-0.359	0.062	-0.097			down
Q23195	CELE_W06B4.2	N-acetyl-D-glucosamine kinase	WBGene00021057	-0.064	-0.279	-0.343	-0.16	-0.224		down	down
Q23206	CELE_W06E11.1	Uncharacterized protein	WBGene00021061	0.512	-0.007	0.505	0.181	0.693					up
G5EDC9	CELE_W07A12.8	Uncharacterized protein	WBGene00012325	0.221	-0.224	-0.003	0.018	0.239
K8F7V7	CELE_W07E11.1	Glutamate synthase (NADH)	WBGene00012326	-0.307	-0.041	-0.348	0.16	-0.147	down		down		down
Q9TYV3	CELE_W07E6.2	WD_REPEATS_REGION domain-containing protein	WBGene00021074	1.379	-0.083	1.296	0.064	1.443	up		up		up
Q9N5B3	CELE_W08E12.7	Peptidase_M24 domain-containing protein	WBGene00021088	0.109	0.217	0.326	0.291	0.399		up	up	up	up
O02109	CELE_W08F4.3	Sigma non-opioid intracellular receptor 1	WBGene00021093	0.501	-0.408	0.093	-0.391	0.11	up	down		down
A0A486WV58	CELE_W09B6.4	Uncharacterized protein	WBGene00021104	0.265	-0.006	0.259	0.133	0.398					up
P91532	CELE_W09C3.7	Uncharacterized protein	WBGene00021114	-0.073	-1.224	-1.298	-0.266	-0.34		down	down
G5EFH0	CELE_W09C5.1	Ribosome biogenesis protein NSA2 homolog	WBGene00012351	2.341	-0.181	2.16	-0.048	2.293	up		up		up
O18181	CELE_W09D10.1	Arf-GAP domain-containing protein	WBGene00012359	-0.085	-0.08	-0.165	-0.069	-0.154			down		down
O18183	CELE_W09D10.4	Protein phosphatase	WBGene00012362	-0.024	0.289	0.265	-0.218	-0.242		up	up		down
O45198	CELE_W09G12.7	EF-hand domain-containing protein	WBGene00021121	1.376	-0.553	0.823	-0.667	0.709	up		up		up
G5EEZ1	CELE_W09G3.7	Uncharacterized protein	WBGene00012370	0.036	0.038	0.074	0.012	0.048
O45011	CELE_W10C8.5	Arginine kinase	WBGene00021128	0.208	0.163	0.371	-0.102	0.106	up	up	up		up
C0Z1Y2	CELE_W10D9.6	Uncharacterized protein	WBGene00185079	0.032	0.084	0.116	0.418	0.45
O44923	CELE_W10G11.19	Uncharacterized protein	WBGene00021148	-0.272	0.052	-0.22	0.113	-0.159	down
Q2HQL2	CELE_Y105C5A.8	Uncharacterized protein	WBGene00013633	0.349	-0.111	0.237	-0.086	0.262	up		up		up
Q9U309	CELE_Y105C5B.15	Purple acid phosphatase	WBGene00013654	-0.694	-0.214	-0.908	0.245	-0.449	down		down		down
Q9U315	CELE_Y105C5B.5	DUF4440 domain-containing protein	WBGene00013647	-0.575	0.223	-0.352	0.371	-0.204	down		down
K8ES47	CELE_Y105E8A.1	Glutaredoxin domain-containing protein	WBGene00013666	-0.173	-0.174	-0.347	-0.296	-0.469			down		down
Q9NEY7	CELE_Y105E8A.11	Uncharacterized protein	WBGene00013671	0.059	0.599	0.658	-0.254	-0.195
Q9NF22	CELE_Y105E8A.2	Uncharacterized protein	WBGene00013667	0.012	-0.107	-0.095	-0.117	-0.105
B3KYC0	CELE_Y105E8A.20	Methionine--tRNA ligase, mitochondrial	WBGene00013678	0.481	0.319	0.8	0.039	0.52	up	up	up		up
A0A0K3AQN0	CELE_Y105E8A.25	DH domain-containing protein	WBGene00013682	-0.049	-0.103	-0.152	0.005	-0.043			down
Q95Q32	CELE_Y105E8B.9	Beta-glucuronidase	WBGene00013693	-0.081	-0.302	-0.383	0.126	0.045		down	down
Q7K7C1	CELE_Y106G6D.8	Activin_recp domain-containing protein	WBGene00013704	-0.181	0.052	-0.129	0.319	0.138
Q9U2Z5	CELE_Y106G6H.14	SH3 domain-containing protein	WBGene00013724	-0.083	-0.14	-0.223	-0.295	-0.379					down
Q9U2Z9	CELE_Y106G6H.8	Uncharacterized protein	WBGene00013720	-0.278	-0.187	-0.465	-0.06	-0.338
Q95ZJ9	CELE_Y10G11A.1	5'-nucleotidase	WBGene00012423	0.22	-0.403	-0.183	-0.148	0.071		down
H2KZ40	CELE_Y110A7A.9	WD_REPEATS_REGION domain-containing protein	WBGene00022459	-0.141	-0.152	-0.293	0.016	-0.125			down
E0R7L2	CELE_Y111B2A.12	WD_REPEATS_REGION domain-containing protein	WBGene00013735	1.339	-0.005	1.334	0.176	1.515	up		up		up
Q9U2U3	CELE_Y116A8C.27	Uncharacterized protein	WBGene00013804	0.215	-0.006	0.209	-0.174	0.041
E8MDW0	CELE_Y116A8C.30	Uncharacterized protein	WBGene00013807	-0.407	0.349	-0.058	0.318	-0.089	down	up
Q9U2R7	CELE_Y11D7A.10	Uncharacterized protein	WBGene00012434	-0.16	0.547	0.387	0.027	-0.134		up	up
Q9XXJ4	CELE_Y12A6A.1	Uncharacterized protein	WBGene00012439	0.134	0.313	0.447	0.174	0.308		up	up		up
Q9U2R3	CELE_Y15E3A.4	MFS domain-containing protein	WBGene00012443	-0.388	0.482	0.094	0.411	0.023	down	up		up
K8ESM2	CELE_Y16B4A.2	Carboxypeptidase	WBGene00012445	-0.151	0.863	0.712	-0.003	-0.155		up	up
Q9XXI3	CELE_Y17G7B.12	RNA exonuclease 4	WBGene00012465	1.02	0.004	1.024	0.254	1.274	up		up		up
Q9XXH7	CELE_Y17G7B.17	Uncharacterized protein	WBGene00012468	-0.043	-0.188	-0.23	-0.14	-0.182
Q9XXJ1	CELE_Y17G7B.3	Lactamase_B domain-containing protein	WBGene00012459	-0.047	0.146	0.099	0.017	-0.03
Q9BL94	CELE_Y18H1A.4	Uncharacterized protein	WBGene00021210	-0.064	0.173	0.109	-0.034	-0.097
Q965Q1	CELE_Y22D7AL.10	10 kDa heat shock protein, mitochondrial	WBGene00021248	0.129	0.712	0.841	0.181	0.311		up	up		up
Q9N477	CELE_Y23H5B.5	U3 small nucleolar RNA-associated protein 15 homolog	WBGene00021276	1.193	-0.068	1.126	0.153	1.346	up		up		up
Q9TYL2	CELE_Y25C1A.13	Uncharacterized protein	WBGene00021296	-0.172	0.387	0.215	0.172	0	down	up	up
D3NQ92	CELE_Y25C1A.14	Uncharacterized protein	WBGene00194985	-0.635	-0.351	-0.985	0.358	-0.277	down		down
H2KY99	CELE_Y25C1A.7	Yip1 domain-containing protein	WBGene00021294	0.206	-0.316	-0.11	-0.162	0.044
Q7YWR7	CELE_Y26E6A.3	Uncharacterized protein	WBGene00012514	-0.162	0.09	-0.072	0.104	-0.058	down
H8ESD3	CELE_Y2H9A.4	Uncharacterized protein	WBGene00012381	-0.241	0.044	-0.196	0.262	0.022
G5EDP0	CELE_Y32F6A.5	Uncharacterized protein	WBGene00012530	0.041	-1.145	-1.104	-0.667	-0.627		down	down	down	down
O62421	CELE_Y32F6B.1	Solute carrier organic anion transporter family member	WBGene00012531	-0.517	0.218	-0.299	0.211	-0.306	down		down		down
Q9N534	CELE_Y32H12A.7	ABC1 domain-containing protein	WBGene00021315	-0.039	0.272	0.233	-0.05	-0.089		up	up
G5ECK4	CELE_Y37A1B.17	Uncharacterized protein	WBGene00044989	-0.081	-0.028	-0.109	0.039	-0.043			down
Q7YTJ3	CELE_Y37D8A.25	PH domain-containing protein	WBGene00012560	-0.391	0.07	-0.321	0.192	-0.199	down		down
U4PBL3	CELE_Y37E11AM.3	Uncharacterized protein	WBGene00021367	0.014	0.255	0.269	0.029	0.043		up	up
Q9TYN2	CELE_Y37E11B.5	tRNA-dihydrouridine(47) synthase [NAD(P)(+)]	WBGene00021377	0.829	0.101	0.93	-0.066	0.763	up		up		up
A0A486WWC6	CELE_Y37E3.17	Uncharacterized protein	WBGene00021355	-0.075	0.347	0.272	0.097	0.022		up	up
Q9BKU5	CELE_Y37E3.8	60S ribosomal protein L27a	WBGene00021350	-0.099	0.327	0.228	0.365	0.266		up
A5PEY0	CELE_Y37H2A.14	Uncharacterized protein	WBGene00045416	-1.939	-0.378	-2.317	-0.296	-2.235	down		down		down
Q9U2M9	CELE_Y37H9A.1	Uncharacterized protein	WBGene00012576	2.3	-0.078	2.222	-0.115	2.185	up		up		up
Q95X11	CELE_Y38A10A.7	N-alpha-acetyltransferase 40	WBGene00021392	-0.112	-0.009	-0.122	0.134	0.021
H2KZW8	CELE_Y38C1AA.1	PlsC domain-containing protein	WBGene00021394	0.055	0.1	0.155	0.047	0.101
H2KMK6	CELE_Y38E10A.22	Uncharacterized protein	WBGene00012600	0.349	-0.317	0.033	-0.207	0.143	up	down
Q9NAI7	CELE_Y38E10A.24	Uncharacterized protein	WBGene00012602	-0.111	-0.554	-0.665	0.155	0.044		down	down
A0A9S2	CELE_Y38F2AR.12	Hydantoinase_B domain-containing protein	WBGene00021430	-0.565	0.142	-0.423	0.07	-0.495	down	up	down		down
Q9XX30	CELE_Y39A1A.20	Uncharacterized protein	WBGene00012657	-0.225	0.302	0.077	0.61	0.384
Q9XX10	CELE_Y39A1A.22	Uncharacterized protein	WBGene00012659	0.168	-0.131	0.037	-0.174	-0.006
G5EEN7	CELE_Y39A1A.3	Uncharacterized protein	WBGene00012643	0.347	-0.394	-0.047	0.017	0.364
Q9N412	CELE_Y39A3CL.1	Uncharacterized protein	WBGene00021440	-0.094	-0.121	-0.215	0.042	-0.052			down
Q9N416	CELE_Y39A3CL.3	Uncharacterized protein	WBGene00021441	-1.365	0.995	-0.37	1.05	-0.314
H2L0P9	CELE_Y39A3CL.4	TLDc domain-containing protein	WBGene00021442	-0.047	-0.043	-0.09	0.263	0.216
Q9NES7	CELE_Y39B6A.1	Uncharacterized protein	WBGene00012664	1.064	0.098	1.162	-0.358	0.706	up		up		up
A5HWB2	CELE_Y39B6A.3	Fe-S_biosyn domain-containing protein	WBGene00012666	-0.269	0.305	0.036	-0.099	-0.367		up			down
Q95XR3	CELE_Y39G10AR.9	WD_REPEATS_REGION domain-containing protein	WBGene00021467	-0.009	0.167	0.158	0.185	0.176
Q9NAI5	CELE_Y39G8B.1	Aldo_ket_red domain-containing protein	WBGene00012722	-0.187	0.069	-0.118	-0.019	-0.206	down				down
Q965W0	CELE_Y40B10A.9	Uncharacterized protein	WBGene00021493	-0.186	0.083	-0.103	-0.409	-0.596
Q9XWA4	CELE_Y40H7A.10	Uncharacterized protein	WBGene00012747	-0.738	0.412	-0.327	-0.06	-0.798	down				down
A0A1D3PDA8	CELE_Y41C4A.32	WD_REPEATS_REGION domain-containing protein	WBGene00270321	0.212	0.01	0.223	-0.198	0.014
Q9U2I4	CELE_Y41C4A.9	Uncharacterized protein	WBGene00012756	1.343	-0.055	1.287	0.37	1.713	up		up		up
U4PRX8	CELE_Y41D4A.4	Transmembrane 9 superfamily member	WBGene00021506	0.11	-0.1	0.01	-0.075	0.034
Q95Y11	CELE_Y41D4B.11	Uncharacterized protein	WBGene00021514	1.733	-0.264	1.468	0.137	1.869	up		up		up
O62436	CELE_Y41E3.1	Uncharacterized protein	WBGene00012762	-0.018	0.012	-0.006	0.062	0.045
A0A078BQL1	CELE_Y41E3.7	Uncharacterized protein	WBGene00012765	-0.024	-0.08	-0.104	-0.106	-0.13
O62437	CELE_Y41E3.8	Uncharacterized protein	WBGene00012766	-0.182	-0.33	-0.511	-0.18	-0.361			down
Q9N3Y1	CELE_Y42H9AR.1	GRASP55_65 domain-containing protein	WBGene00021536	0.225	-0.007	0.218	0.031	0.256	up		up		up
Q9XXE9	CELE_Y43C5A.2	Fibrinogen C-terminal domain-containing protein	WBGene00012782	-1.285	0.446	-0.839	-0.484	-1.769	down		down		down
G5EDJ9	CELE_Y43C5B.3	Uncharacterized protein	WBGene00012786	-0.355	0.069	-0.286	-0.706	-1.06					down
O45934	CELE_Y43F4B.5	Uncharacterized protein	WBGene00012803	-0.331	0.299	-0.032	0.146	-0.185	down	up		up	down
B7FAR9	CELE_Y43F8B.1	Uncharacterized protein	WBGene00012812	0.049	-0.092	-0.043	-0.136	-0.086
Q9XWY1	CELE_Y43F8B.11	DUF19 domain-containing protein	WBGene00012821	0.258	-0.535	-0.277	-0.316	-0.058		down
Q9XWN7	CELE_Y43F8C.13	IU_nuc_hydro domain-containing protein	WBGene00012834	-0.393	0.184	-0.209	0.039	-0.354	down				down
Q9XWP1	CELE_Y43F8C.7	ER membrane protein complex subunit 10	WBGene00012829	0.068	-0.038	0.029	-0.073	-0.005
Q9XXE2	CELE_Y44A6D.2	Uncharacterized protein	WBGene00012853	-0.926	0.016	-0.91	0.532	-0.394	down		down	up	down
G5EDA8	CELE_Y45F10B.13	Uncharacterized protein	WBGene00012875	0.536	-0.171	0.365	-0.138	0.398	up	down	up		up
O62476	CELE_Y45F10D.6	Uncharacterized protein	WBGene00012886	0.541	0.154	0.695	0.04	0.581			up
O62477	CELE_Y45F10D.7	Uncharacterized protein	WBGene00012887	1.545	-0.069	1.476	0.056	1.601	up		up		up
Q9XWY8	CELE_Y45F3A.9	SpoU_sub_bind domain-containing protein	WBGene00012864	0.745	0.204	0.949	-0.026	0.719			up
Q8WTM0	CELE_Y45G5AL.1	Uncharacterized protein	WBGene00021554	0.095	-0.243	-0.148	-0.134	-0.038		down	down
Q9N4X1	CELE_Y46D2A.2	Uncharacterized protein	WBGene00021590	-0.015	0.278	0.263	0.566	0.551
Q965N8	CELE_Y46E12BL.2	NUC173 domain-containing protein	WBGene00021595	1.336	-0.121	1.215	0.081	1.418	up		up		up
Q9U2F1	CELE_Y46G5A.18	R3H-assoc domain-containing protein	WBGene00012908	0.985	0.092	1.077	0.584	1.569	up		up		up
Q9N4V3	CELE_Y47D9A.1	NTP_transferase domain-containing protein	WBGene00021628	-0.024	-0.026	-0.049	0.166	0.143
Q65XX4	CELE_Y47G6A.15	Uncharacterized protein	WBGene00021641	-0.347	-0.401	-0.748	0.331	-0.016			down
Q9N3S8	CELE_Y47G6A.18	Uncharacterized protein	WBGene00021644	-0.098	-0.161	-0.259	0.055	-0.043			down
Q9BL81	CELE_Y47G6A.21	Uncharacterized protein	WBGene00021646	-0.126	0.226	0.101	0.052	-0.073	down	up
Q8MXS8	CELE_Y47G6A.22	Uncharacterized protein	WBGene00021647	-0.307	0.365	0.058	0.208	-0.099	down	up		up
A5A8P5	CELE_Y47G6A.33	Uncharacterized protein	WBGene00045399	-0.694	0.84	0.146	2.067	1.372
Q9XWE2	CELE_Y47H9C.1	Uncharacterized protein	WBGene00012947	-0.827	0.224	-0.603	0.241	-0.585	down		down
G4SP89	CELE_Y48A5A.3	Uncharacterized protein	WBGene00044466	0.125	0.16	0.284	-0.101	0.024			up
Q9XXD0	CELE_Y48A6B.7	CMP/dCMP-type deaminase domain-containing protein	WBGene00012968	-0.533	0.472	-0.061	0.062	-0.471	down	up			down
Q9XWK5	CELE_Y48A6C.4	Ipi1_N domain-containing protein	WBGene00012977	1.401	-0.209	1.193	-0.024	1.378	up		up		up
Q9U294	CELE_Y48B6A.13	Diphosphomevalonate decarboxylase	WBGene00012984	1.107	0.21	1.318	0.08	1.188	up	up	up		up
H1UBJ9	CELE_Y48C3A.14	DNA topoisomerase	WBGene00012995	0.036	-0.018	0.017	-0.082	-0.047
Q9NAF8	CELE_Y48C3A.18	Threonylcarbamoyl-AMP synthase	WBGene00012997	0.497	-0.408	0.089	-0.45	0.047
Q9U287	CELE_Y48C3A.20	tRNA pseudouridine(55) synthase	WBGene00012998	0.65	-0.03	0.621	0.208	0.859	up		up		up
Q9NAG5	CELE_Y48C3A.3	Uncharacterized protein	WBGene00012987	-0.373	0.278	-0.096	0.168	-0.205	down	up			down
Q8I0Z3	CELE_Y48E1C.4	Uncharacterized protein	WBGene00013017	0.145	0.336	0.481	-0.654	-0.509
G5EF86	CELE_Y48G10A.1	S-formylglutathione hydrolase	WBGene00013018	-0.017	0.047	0.03	0.074	0.057
Q9U283	CELE_Y48G10A.3	Uncharacterized protein	WBGene00013020	0.011	-0.093	-0.082	0.076	0.087
Q7YWQ6	CELE_Y48G10A.6	Uncharacterized protein	WBGene00013023	-0.419	0.281	-0.137	0.215	-0.203	down
Q9N3Q5	CELE_Y48G1A.1	Uncharacterized protein	WBGene00021657	0.609	-0.222	0.387	-0.059	0.55	up				up
V6CJW9	CELE_Y48G1C.10	Myotubularin phosphatase domain-containing protein	WBGene00021683	-0.198	-0.004	-0.202	-0.122	-0.319
Q7YZG5	CELE_Y48G9A.9	Tyrosine-protein phosphatase	WBGene00021702	-0.058	-0.074	-0.132	-0.131	-0.19					down
Q9XTU5	CELE_Y49E10.16	Lipase_3 domain-containing protein	WBGene00013035	-0.349	0.488	0.14	-0.686	-1.035					down
Q9XTU3	CELE_Y49E10.18	Lipase_3 domain-containing protein	WBGene00013037	-0.429	1.151	0.722	-0.261	-0.69		up	up		down
E1B6W2	CELE_Y49E10.21	Uncharacterized protein	WBGene00013040	0.034	-0.114	-0.08	-0.17	-0.136
Q9N4U1	CELE_Y49F6B.2	Fcf2 domain-containing protein	WBGene00021715	1.437	0.059	1.496	0.131	1.569	up		up		up
Q9UAZ2	CELE_Y49G5A.1	BPTI/Kunitz inhibitor domain-containing protein	WBGene00021731	-1.655	0.083	-1.572	2.375	0.721	down		down	up
Q7YZG3	CELE_Y4C6B.7	Uncharacterized protein	WBGene00021161	-2.28	1.402	-0.879	1.78	-0.5	down
A0A0K3ARN9	CELE_Y50D4B.1	Uncharacterized protein	WBGene00021740	0.568	-0.663	-0.096	-0.386	0.181
A0A0K3ASH9	CELE_Y50D4B.4	Uncharacterized protein	WBGene00021743	0.586	0.82	1.406	0.456	1.042	up	up	up		up
Q965Q9	CELE_Y50D4C.3	Tudor domain-containing protein	WBGene00021748	0.084	-0.202	-0.118	-0.25	-0.166
Q8IAA5	CELE_Y50D7A.10	ADF-H domain-containing protein	WBGene00021758	-0.386	-0.096	-0.482	0.143	-0.243	down		down
Q9N3L4	CELE_Y50D7A.3	Phosphorylase kinase	WBGene00021753	0.054	-0.177	-0.123	-0.054	0
Q8I4C7	CELE_Y51A2D.13	Uncharacterized protein	WBGene00013080	-0.018	-0.267	-0.285	0.092	0.075
Q9XXQ4	CELE_Y51A2D.18	MFS domain-containing protein	WBGene00013083	-0.222	0.27	0.048	0.296	0.074	down	up		up
Q4W5H0	CELE_Y51F10.11	Uncharacterized protein	WBGene00044438	-0.371	0.08	-0.291	0.183	-0.188
Q8TA47	CELE_Y51F10.7	Uncharacterized protein	WBGene00021768	-0.367	0.313	-0.053	0.227	-0.14	down	up
Q9XWJ5	CELE_Y51H1A.3	Uncharacterized protein	WBGene00013094	0.191	-0.644	-0.453	0.063	0.255		down	down		up
Q2HQJ8	CELE_Y51H4A.15	Pre-rRNA-processing protein TSR2 homolog	WBGene00013109	1.191	0.151	1.342	0.102	1.292	up		up		up
Q9N3J4	CELE_Y51H7C.7	Uncharacterized protein	WBGene00021785	1.004	-0.254	0.75	-0.127	0.878	up		up		up
Q9U255	CELE_Y52B11A.10	MI domain-containing protein	WBGene00013129	0.642	-0.05	0.593	0.038	0.68
Q9N3H9	CELE_Y52E8A.3	Thioredoxin domain-containing protein	WBGene00021796	-0.362	0.52	0.159	0.272	-0.089
O18212	CELE_Y53C12A.3	Protein YIPF3	WBGene00013139	0.447	-0.203	0.244	-0.113	0.334	up		up		up
O18215	CELE_Y53C12B.1	WD_REPEATS_REGION domain-containing protein	WBGene00013143	0.877	-0.063	0.813	0.074	0.951	up		up		up
Q9NAB7	CELE_Y53F4B.18	Amidase domain-containing protein	WBGene00013164	-0.327	-0.029	-0.356	0.017	-0.31	down		down		down
Q9NA99	CELE_Y53F4B.21	Uncharacterized protein	WBGene00013167	0.064	-0.336	-0.272	-0.221	-0.157
Q9N3G0	CELE_Y53G8AR.6	SAP domain-containing protein	WBGene00021813	0.48	0.059	0.539	0.052	0.532	up		up		up
Q9N3G1	CELE_Y53G8AR.8	ATP synthase subunit s, mitochondrial	WBGene00021815	0.152	0.224	0.376	-0.288	-0.136			up
Q9N3F7	CELE_Y53G8AR.9	Uncharacterized protein	WBGene00021816	0.306	0.02	0.325	-0.069	0.237	up		up
Q9N4S0	CELE_Y53G8B.1	Maleylacetoacetate isomerase	WBGene00021817	-0.178	0.216	0.038	0.205	0.027
Q9N4S3	CELE_Y53G8B.2	Acyltransferase	WBGene00021818	-0.218	-0.227	-0.446	0.051	-0.168	down	down	down		down
G5EDV7	CELE_Y53H1B.2	Uncharacterized protein	WBGene00013181	0.587	-0.325	0.262	-0.145	0.442	up				up
A0A2C9C360	CELE_Y54E10A.17	DOMON domain-containing protein	WBGene00021835	-0.305	0.203	-0.102	0.059	-0.246
Q9N3F2	CELE_Y54E10A.6	B3_4 domain-containing protein	WBGene00021828	1.147	0.185	1.332	0.13	1.277	up	up	up		up
Q9N3C8	CELE_Y54E10BR.2	Uncharacterized protein	WBGene00021841	0.071	-0.322	-0.25	-0.159	-0.087
Q9N3D3	CELE_Y54E10BR.4	RNA-binding protein NOB1	WBGene00021843	1.068	0.011	1.079	0.054	1.122	up		up		up
Q9XWI1	CELE_Y54E2A.4	SEC63 domain-containing protein	WBGene00013189	0.01	-0.063	-0.053	0.057	0.067
Q9XWK2	CELE_Y54E5A.5	Uncharacterized protein	WBGene00013200	0.772	0.238	1.01	0.473	1.245	up		up	up	up
H2KZK9	CELE_Y54F10AL.1	GDT1 family protein	WBGene00021847	-0.717	0.093	-0.624	0.308	-0.409	down		down		down
Q9BL03	CELE_Y54F10AM.5	NADH dehydrogenase [ubiquinone] 1 alpha subcomplex subunit 8	WBGene00021849	0.33	-0.761	-0.431	0.031	0.362	up	down	down		up
Q965T2	CELE_Y54F10AR.1	Uncharacterized protein	WBGene00021854	0.016	-0.153	-0.137	-0.025	-0.009		down	down
Q9N3C2	CELE_Y54F10AR.2	Uncharacterized protein	WBGene00021855	-0.159	0.495	0.336	0.086	-0.073		up	up
C0Z3L6	CELE_Y54G11A.17	Uncharacterized protein	WBGene00185067	0.371	0.57	0.941	0.15	0.521	up	up	up		up
Q9XW03	CELE_Y54G11A.2	Coiled-coil domain-containing protein 25	WBGene00013213	0.128	-0.109	0.019	-0.033	0.095
Q9XW02	CELE_Y54G11A.4	Tetratricopeptide repeat protein 38	WBGene00013215	-0.121	-0.168	-0.289	-0.298	-0.419
Q9XW01	CELE_Y54G11A.7	Tetratricopeptide repeat protein 38	WBGene00013216	-0.405	-0.26	-0.665	-0.142	-0.547	down	down	down		down
Q9XVZ9	CELE_Y54G11A.9	Fe-S_biosyn domain-containing protein	WBGene00013218	-0.169	0.795	0.627	0.213	0.044		up	up
Q95XX7	CELE_Y54G2A.10	Uncharacterized protein	WBGene00021875	-0.677	-0.038	-0.715	0.715	0.038	down		down
Q4R169	CELE_Y54G2A.41	Uncharacterized protein	WBGene00044485	0.112	-0.21	-0.098	-0.161	-0.05
Q4R165	CELE_Y54G2A.45	Lipase_3 domain-containing protein	WBGene00044488	-1.536	1.085	-0.452	-1.168	-2.704					down
Q8I4C6	CELE_Y54G9A.9	Uncharacterized protein	WBGene00013211	-0.081	0.349	0.268	0.285	0.204
Q9N393	CELE_Y54H5A.1	WD_REPEATS_REGION domain-containing protein	WBGene00021899	1.981	0.112	2.093	0.148	2.13	up		up		up
Q9BL64	CELE_Y54H5A.2	Protein HGH1 homolog	WBGene00021900	1.582	0.039	1.621	0.172	1.754	up		up		up
Q9N362	CELE_Y55F3AM.13	Uncharacterized protein	WBGene00021930	0.314	0.114	0.428	0.17	0.485	up		up	up	up
Q9N370	CELE_Y55F3AM.9	Ubiquitin carboxyl-terminal hydrolase	WBGene00021926	0.086	-0.325	-0.239	-0.226	-0.14		down	down
Q9N357	CELE_Y55F3AR.2	Thioredoxin domain-containing protein	WBGene00021933	-0.016	0.126	0.11	-0.024	-0.039
Q9N341	CELE_Y55F3BR.1	ATP-dependent RNA helicase DDX1	WBGene00021938	0.22	-0.023	0.197	0.121	0.341					up
A0A1I6CMC9	CELE_Y55F3BR.6	SHSP domain-containing protein	WBGene00021943	0.093	-0.283	-0.191	-0.293	-0.2		down		down
Q9U241	CELE_Y56A3A.19	Acyl carrier protein	WBGene00013237	-0.029	0.387	0.358	0.138	0.109		up	up
Q9U237	CELE_Y56A3A.22	DUF1279 domain-containing protein	WBGene00013239	0.181	0.271	0.452	-0.313	-0.132			up
A0A1C3NSQ4	CELE_Y56A3A.31	Uncharacterized protein	WBGene00013243	0.601	-0.024	0.577	0.022	0.623
A7DTF5	CELE_Y56A3A.7	Uncharacterized protein	WBGene00013228	0.157	0.027	0.184	-0.066	0.091
Q9NA69	CELE_Y57A10A.13	Uncharacterized protein	WBGene00013256	0.076	-0.022	0.054	-0.073	0.004
Q9NA74	CELE_Y57A10A.26	Uncharacterized protein	WBGene00013266	-0.262	-0.068	-0.33	-0.046	-0.308	down		down		down
Q9U210	CELE_Y57A10A.27	Uncharacterized protein	WBGene00013267	1.753	-0.041	1.712	0	1.753	up		up		up
O18222	CELE_Y57G11A.4	DOMON domain-containing protein	WBGene00013292	0.357	0.159	0.515	0.011	0.368	up		up		up
O18224	CELE_Y57G11B.5	Uncharacterized protein	WBGene00013297	-0.753	-0.051	-0.803	0.25	-0.502	down		down
O18253	CELE_Y57G11C.31	Nucleotid_trans domain-containing protein	WBGene00013321	-0.546	0.22	-0.325	0.25	-0.295	down		down
Q9U204	CELE_Y57G11C.33	Erf4 domain-containing protein	WBGene00013323	-0.254	0.171	-0.083	0.399	0.145
Q7YTI7	CELE_Y57G11C.40	Uncharacterized protein	WBGene00013329	0.199	-0.061	0.138	-0.168	0.032
Q7YTI6	CELE_Y57G11C.41	Uncharacterized protein	WBGene00013330	2.325	0.085	2.409	0.31	2.635	up		up		up
Q7YTI4	CELE_Y57G11C.43	Protein KTI12 homolog	WBGene00013332	0.449	0.099	0.549	-0.005	0.444	up		up		up
O76628	CELE_Y57G7A.1	Uncharacterized protein	WBGene00021965	0.284	-0.113	0.171	-0.021	0.263	up				up
D6RYD3	CELE_Y58A7A.1	Copper transport protein	WBGene00021975	-0.153	0.157	0.004	-0.253	-0.405					down
Q966A6	CELE_Y58A7A.3	IBR domain-containing protein	WBGene00021977	0.189	-0.169	0.021	0.277	0.467					up
Q9NEQ8	CELE_Y59A8B.8	Uncharacterized protein	WBGene00013345	-0.07	-0.218	-0.288	-0.213	-0.282		down	down	down	down
Q9TZC6	CELE_Y59C2A.1	Peptidase_M14 domain-containing protein	WBGene00021984	-0.089	-0.025	-0.114	-0.052	-0.141
Q9N306	CELE_Y61A9LA.10	Bms1-type G domain-containing protein	WBGene00022021	0.917	-0.09	0.827	-0.049	0.869	up		up		up
A0A061ACK7	CELE_Y62E10A.13	Phosphoserine phosphatase	WBGene00013379	0.049	-0.052	-0.003	-0.013	0.036
Q9U1X8	CELE_Y62E10A.24	Ribonuclease P protein subunit p20	WBGene00302968	1.421	0.44	1.861	-0.682	0.738	up		up
Q9U1X0	CELE_Y62E10A.6	NADPH:adrenodoxin oxidoreductase, mitochondrial	WBGene00013376	-0.054	0.311	0.257	0.006	-0.049		up	up
Q9XWT5	CELE_Y62H9A.3	Uncharacterized protein	WBGene00013391	-0.694	0.195	-0.499	-0.083	-0.777	down		down		down
Q9XWT4	CELE_Y62H9A.4	Uncharacterized protein	WBGene00013392	-0.878	0.335	-0.543	0.425	-0.453
Q9XWS6	CELE_Y62H9A.5	Uncharacterized protein	WBGene00013393	-1.006	-0.456	-1.462	-0.105	-1.111	down		down		down
Q9XWG2	CELE_Y63D3A.7	NADH dehydrogenase [ubiquinone] 1 alpha subcomplex subunit 2	WBGene00013406	-0.347	-0.41	-0.757	0.667	0.32			down
Q9BL56	CELE_Y65B4A.8	CTP_transf_like domain-containing protein	WBGene00022031	-0.144	0.16	0.016	0.045	-0.099	down	up
G5EDQ7	CELE_Y66A7A.7	Uncharacterized protein	WBGene00013426	0.066	-0.248	-0.182	-0.217	-0.151
Q9BI47	CELE_Y66D12A.13	MFS domain-containing protein	WBGene00013439	-0.798	-0.093	-0.891	0.202	-0.596	down		down
Q95PZ7	CELE_Y66D12A.9	Uncharacterized protein	WBGene00013435	0.868	-0.091	0.776	0.188	1.056	up		up		up
H2L0I6	CELE_Y67D8A.2	Phosphorylase b kinase regulatory subunit	WBGene00022059	-0.131	-0.143	-0.274	-0.009	-0.14			down
Q95PY9	CELE_Y67H2A.7	Peptidase_M3 domain-containing protein	WBGene00013464	-0.03	0.231	0.201	-0.265	-0.295					down
Q95XI7	CELE_Y69A2AR.16	Uncharacterized protein	WBGene00022087	-0.124	-0.004	-0.128	0.234	0.11
Q95XJ0	CELE_Y69A2AR.18	Uncharacterized protein	WBGene00022089	0.112	0.145	0.257	0.004	0.116	up	up	up		up
Q95XI6	CELE_Y69A2AR.22	Uncharacterized protein	WBGene00022093	0.295	0.088	0.383	-0.082	0.213
Q95XG6	CELE_Y69A2AR.3	NADH dehydrogenase [ubiquinone] flavoprotein 3, mitochondrial	WBGene00022075	0.1	-0.439	-0.339	-0.108	-0.007		down	down
Q9XW37	CELE_Y69E1A.5	Uncharacterized protein	WBGene00013477	-0.007	-0.076	-0.083	-0.206	-0.213				down	down
Q9U1T1	CELE_Y6B3B.9	Uncharacterized protein	WBGene00012393	1.101	-0.164	0.937	-0.041	1.06	up		up		up
Q9XWC5	CELE_Y70G10A.3	Solute carrier organic anion transporter family member	WBGene00013499	0.424	0.362	0.787	-0.195	0.229
Q9N4I3	CELE_Y71F9AL.9	Uncharacterized protein	WBGene00022114	-0.036	0.016	-0.02	-0.17	-0.206					down
C0VXV5	CELE_Y71F9B.9	Uncharacterized protein	WBGene00022130	-0.324	0.108	-0.216	-0.029	-0.353	down				down
Q95XN1	CELE_Y71G12B.10	Hydroxymethylglutaryl-CoA lyase	WBGene00022150	0.04	0.371	0.411	0.003	0.043		up	up
Q95XM8	CELE_Y71G12B.25	MFS domain-containing protein	WBGene00022160	-0.093	0.251	0.158	0.206	0.113
Q95X21	CELE_Y71H10B.1	Uncharacterized protein	WBGene00022201	-0.306	-0.214	-0.52	-0.069	-0.375	down	down	down		down
Q9BL28	CELE_Y71H2AM.1	Probable tRNA N6-adenosine threonylcarbamoyltransferase	WBGene00022166	0.832	-0.213	0.619	-0.078	0.754	up		up		up
Q9BL46	CELE_Y71H2AM.11	M20_dimer domain-containing protein	WBGene00022176	0.091	-0.116	-0.025	-0.019	0.072
Q9BL44	CELE_Y71H2AM.12	Uncharacterized protein	WBGene00022177	-0.237	-0.024	-0.261	0.024	-0.213	down		down		down
Q9BL29	CELE_Y71H2AM.2	Phosphatidylinositol-4,5-bisphosphate 4-phosphatase	WBGene00022167	-0.129	0.069	-0.06	0.013	-0.117
Q9BL35	CELE_Y71H2AM.20	Serine/threonine-protein phosphatase 2A activator	WBGene00022185	-0.38	-0.08	-0.461	-0.009	-0.389	down		down		down
Q2AAC0	CELE_Y71H2AM.3	E3 ubiquitin-protein ligase E3D	WBGene00022168	0.742	0.024	0.766	-0.566	0.176	up		up
Q9BL33	CELE_Y71H2AM.4	Uncharacterized protein	WBGene00022169	0.062	-0.713	-0.651	0.085	0.147		down	down
Q9BL36	CELE_Y71H2AM.6	Uncharacterized protein	WBGene00022171	-0.339	0.042	-0.297	0.034	-0.305	down		down		down
Q9N4E7	CELE_Y71H2B.1	ACB domain-containing protein	WBGene00022191	0.128	0.498	0.626	0.194	0.322		up	up
Q9N4F1	CELE_Y71H2B.5	Uncharacterized protein	WBGene00022195	0.468	0.004	0.472	-0.06	0.408	up		up		up
Q9GUE9	CELE_Y73B6BL.27	Uncharacterized protein	WBGene00022248	0.186	-0.175	0.011	-0.194	-0.007	up
Q95XC7	CELE_Y73B6BL.31	TPT domain-containing protein	WBGene00022252	-0.161	-0.439	-0.6	0.028	-0.133		down	down
Q4W5P1	CELE_Y73B6BL.44	Uncharacterized protein	WBGene00044350	0.076	-0.29	-0.214	0.02	0.096
Q9N4E2	CELE_Y73C8B.3	Uncharacterized protein	WBGene00022260	0.079	0.157	0.236	-0.047	0.032		up	up
Q9GUM1	CELE_Y73E7A.1	Uncharacterized protein	WBGene00022268	0.036	-0.049	-0.012	0.06	0.096
Q9NA33	CELE_Y73F8A.26	Uncharacterized protein	WBGene00013531	-0.67	-0.036	-0.706	-0.772	-1.442			down		down
Q9NA32	CELE_Y73F8A.27	2Fe-2S ferredoxin-type domain-containing protein	WBGene00013532	0.148	0.22	0.368	-0.072	0.076			up
Q9XW68	CELE_Y75B8A.14	GPN-loop GTPase 3	WBGene00013550	0.792	0.086	0.878	0.195	0.987	up		up		up
Q9XW63	CELE_Y75B8A.24	1-phosphatidylinositol 4-kinase	WBGene00013557	0.028	-0.133	-0.105	-0.109	-0.081		down
Q9XW58	CELE_Y75B8A.7	U3 small nucleolar ribonucleoprotein protein MPP10	WBGene00013544	0.553	-0.086	0.467	0.174	0.727	up		up		up
Q9N4C6	CELE_Y76B12C.3	Sep15_SelM domain-containing protein	WBGene00022297	0.091	-0.221	-0.129	-0.192	-0.101
Q9U1R9	CELE_Y79H2A.2	Uncharacterized protein	WBGene00013579	-0.668	0.079	-0.59	0.173	-0.495
Q9XVZ2	CELE_Y7A5A.1	Delta(24)-sterol reductase	WBGene00012407	-0.821	-0.261	-1.082	-0.016	-0.836	down	down	down		down
O18256	CELE_Y7A9A.1	Uncharacterized protein	WBGene00012416	-0.675	-0.017	-0.692	-0.086	-0.761	down		down		down
Q9BKS2	CELE_Y82E9BR.14	GLTP domain-containing protein	WBGene00022347	-0.098	0.028	-0.07	-0.042	-0.14
Q9BKR9	CELE_Y82E9BR.16	MFS domain-containing protein	WBGene00022348	0.161	0.001	0.162	-0.203	-0.042
Q9BKR5	CELE_Y82E9BR.18	Uncharacterized protein	WBGene00022350	-0.006	0.091	0.085	0.193	0.187					up
Q56VY4	CELE_Y87G2A.19	LITAF domain-containing protein	WBGene00044260	0.646	0.23	0.875	0.458	1.103			up		up
Q9U1Q5	CELE_Y87G2A.2	Uncharacterized protein	WBGene00013594	-0.319	-0.532	-0.851	-0.22	-0.539	down	down	down		down
A0A061ACQ8	CELE_Y92H12A.2	E3 ubiquitin-protein ligase	WBGene00022358	-0.069	-0.289	-0.357	0.007	-0.061		down	down
W6RTG0	CELE_Y92H12A.5	DUF2428 domain-containing protein	WBGene00022361	-0.034	-0.146	-0.18	-0.045	-0.08
Q95XC4	CELE_Y92H12BL.5	Nudix hydrolase domain-containing protein	WBGene00022366	-0.561	-0.329	-0.89	0.074	-0.487	down	down	down		down
Q75MI6	CELE_Y94H6A.10	Uncharacterized protein	WBGene00022382	-0.093	-0.431	-0.524	0.023	-0.07		down	down
A7WK43	CELE_Y94H6A.12	Aminoacyl-tRNA hydrolase	WBGene00050885	0.302	0.154	0.456	-0.325	-0.022			up
Q688Z3	CELE_Y94H6A.5	ATP-dependent RNA helicase	WBGene00022378	1.45	-0.298	1.153	-0.04	1.41	up		up		up
A7WK41	CELE_Y94H6A.7	Low molecular weight phosphotyrosine protein phosphatase	WBGene00022379	-0.488	0.262	-0.226	0.737	0.249	down			up
Q965R9	CELE_Y97E10AR.6	BSD domain-containing protein	WBGene00022401	-0.21	-0.362	-0.572	-0.12	-0.33		down	down		down
J7SF87	CELE_Y9C9A.16	Pyr_redox_2 domain-containing protein	WBGene00021183	-0.483	-0.216	-0.699	0.278	-0.204	down		down
P91544	CELE_ZC204.12	Uncharacterized protein	WBGene00022562	-0.109	0.42	0.311	0.276	0.167		up	up
P91558	CELE_ZC239.4	BTB domain-containing protein	WBGene00022567	0.245	-0.612	-0.367	0.45	0.695
G5EBP5	CELE_ZC247.1	Uncharacterized protein	WBGene00013859	0.199	-0.119	0.08	-0.117	0.082	up
H2L0J6	CELE_ZC328.3	VASt domain-containing protein	WBGene00022593	-0.25	-0.145	-0.395	-0.12	-0.37			down		down
Q23258	CELE_ZC373.2	Uncharacterized protein	WBGene00013867	-0.831	-0.344	-1.175	-0.355	-1.186	down		down		down
Q23266	CELE_ZC374.2	Uncharacterized protein	WBGene00013872	0.154	-0.073	0.081	-0.278	-0.124
G3MU29	CELE_ZC434.9	ShKT domain-containing protein	WBGene00013895	0.297	0.272	0.569	0.185	0.482			up		up
Q23320	CELE_ZC443.1	Aldo_ket_red domain-containing protein	WBGene00013896	-0.037	-0.138	-0.175	-0.056	-0.093
Q23330	CELE_ZC449.5	Uncharacterized protein	WBGene00022615	0.092	0.061	0.152	0.181	0.272					up
G4SLU9	CELE_ZC449.8	Uncharacterized protein	WBGene00195189	0.171	-1.205	-1.034	0.195	0.366		down	down
H2KZ70	CELE_ZC477.3	Uncharacterized protein	WBGene00022618	-0.137	0.285	0.147	-0.083	-0.22	down	up	up		down
Q09641	CELE_ZC506.1	alpha-1,2-Mannosidase	WBGene00013919	-0.267	-0.13	-0.397	-0.041	-0.309			down		down
Q23083	CELE_ZC8.6	Phosphatidylinositol 4-kinase type 2	WBGene00022501	0.036	-0.148	-0.112	-0.239	-0.203					down
G5EEZ0	CELE_ZK1010.2	DUF155 domain-containing protein	WBGene00014176	-0.192	0.578	0.386	0.122	-0.07	down	up	up
H2KZM0	CELE_ZK1055.6	Uncharacterized protein	WBGene00022847	-0.495	-0.079	-0.575	0.134	-0.362	down		down		down
O76449	CELE_ZK1055.7	Uncharacterized protein	WBGene00022848	-0.051	0.121	0.07	0.152	0.1
C9IY21	CELE_ZK1058.9	Uncharacterized protein	WBGene00014207	-0.112	-0.011	-0.123	-0.046	-0.158					down
G5EE42	CELE_ZK1098.11	Protein NATD1	WBGene00014226	0.005	0.067	0.072	-0.092	-0.087
G5EF99	CELE_ZK1128.7	SHSP domain-containing protein	WBGene00014233	-0.232	-0.026	-0.258	-0.043	-0.275	down		down		down
A0A1X7RBP4	CELE_ZK1193.2	VWFA domain-containing protein	WBGene00022858	-0.435	0.151	-0.284	0.111	-0.324	down		down		down
Q7JPD8	CELE_ZK1248.19	Protein LZIC	WBGene00022885	-0.169	-0.178	-0.346	-0.115	-0.284
G5EC87	CELE_ZK1307.8	Glucosidase 2 subunit beta	WBGene00014249	-0.018	0.035	0.017	0.001	-0.017
Q5FC82	CELE_ZK1320.13	Uncharacterized protein	WBGene00044007	-1.096	-1.071	-2.167	0.59	-0.505	down	down	down	up	down
Q09657	CELE_ZK1320.9	Acetyl-CoA hydrolase	WBGene00014258	0.198	0.258	0.456	-0.094	0.104	up	up	up
G5EDL9	CELE_ZK1321.4	PDZ domain-containing protein	WBGene00014262	-0.04	-0.004	-0.044	0.158	0.118
Q94315	CELE_ZK154.6	Uncharacterized protein	WBGene00022668	0.558	-1.01	-0.452	-0.41	0.147	up	down	down	down
O44195	CELE_ZK185.3	Uncharacterized protein	WBGene00022683	-0.264	0.434	0.17	0.201	-0.063	down	up	up
Q3V5H6	CELE_ZK185.5	ZT_dimer domain-containing protein	WBGene00044481	-0.862	0.332	-0.531	-0.153	-1.016	down		down		down
O46009	CELE_ZK228.3	Acetyltransf_18 domain-containing protein	WBGene00013946	-0.588	0.474	-0.114	0.501	-0.087	down	up		up
A5Z2W6	CELE_ZK228.4	N-acetyltransferase domain-containing protein	WBGene00013947	-0.558	0.54	-0.017	0.085	-0.472	down	up			down
Q23459	CELE_ZK287.7	Uncharacterized protein	WBGene00013967	1.148	0.525	1.673	-0.305	0.843	up	up	up		up
B4DCT1	CELE_ZK355.8	Uncharacterized protein	WBGene00086560	-0.137	-1.298	-1.435	-0.38	-0.517		down	down
Q23483	CELE_ZK418.5	Transmembrane protein 147	WBGene00022734	-0.715	-0.035	-0.749	0.244	-0.47	down		down
Q23494	CELE_ZK430.7	DDB1- and CUL4-associated factor 13	WBGene00022742	1.333	-0.16	1.174	0.064	1.397	up		up		up
H2KZP7	CELE_ZK470.2	Uncharacterized protein	WBGene00022745	-0.132	0.428	0.296	-0.053	-0.185		up	up
O44895	CELE_ZK484.3	Uncharacterized protein	WBGene00022749	-0.124	-0.177	-0.301	0.065	-0.059			down
Q23526	CELE_ZK546.2	Uncharacterized protein	WBGene00022759	-0.15	-0.166	-0.316	-0.121	-0.271	down	down	down		down
O62512	CELE_ZK550.3	Peptidase_M3 domain-containing protein	WBGene00013997	0.613	0.371	0.984	-0.011	0.602	up	up	up		up
Q4TTB1	CELE_ZK563.7	Uncharacterized protein	WBGene00044355	0.174	-0.733	-0.56	-0.43	-0.256		down	down	down	down
Q23540	CELE_ZK593.2	Uncharacterized protein	WBGene00014002	0.101	0.068	0.169	-0.047	0.054
H2L0Q1	CELE_ZK6.11	Uncharacterized protein	WBGene00022645	0.027	0.021	0.048	-0.154	-0.127
Q27GV3	CELE_ZK688.11	Uncharacterized protein	WBGene00044762	0.667	0.068	0.735	-0.368	0.3			up
Q23090	CELE_ZK742.3	Oxidored_FMN domain-containing protein	WBGene00022813	-0.145	0.218	0.073	-0.021	-0.166		up
Q23091	CELE_ZK742.4	Oxidored_FMN domain-containing protein	WBGene00022814	-0.183	0.03	-0.152	-0.005	-0.188	down				down
Q95PW2	CELE_ZK792.1	Uncharacterized protein	WBGene00014076	-0.191	-0.038	-0.229	0.072	-0.119
Q23591	CELE_ZK792.5	Uncharacterized protein	WBGene00014078	1.102	-0.213	0.89	0.016	1.118	up		up		up
Q23597	CELE_ZK809.3	NADH dehydrogenase [ubiquinone] 1 beta subcomplex subunit 6	WBGene00014086	0.28	-0.68	-0.4	-0.041	0.239	up	down	down		up
Q23606	CELE_ZK813.1	Uncharacterized protein	WBGene00022820	-1.428	0.051	-1.377	0.228	-1.2	down		down		down
Q23605	CELE_ZK813.2	Uncharacterized protein	WBGene00022821	-0.288	-0.597	-0.885	0.03	-0.258		down	down
Q23604	CELE_ZK813.3	Uncharacterized protein	WBGene00022822	-1.006	0.13	-0.876	-0.04	-1.046	down		down		down
A5HU91	CELE_ZK813.7	Uncharacterized protein	WBGene00045394	0.513	1.163	1.677	-0.066	0.447		up	up
Q23614	CELE_ZK822.2	DUF148 domain-containing protein	WBGene00014090	0.985	-0.389	0.596	-0.074	0.911	up	down	up		up
Q23624	CELE_ZK829.7	PKS_ER domain-containing protein	WBGene00014096	-0.194	-0.154	-0.348	0.052	-0.142	down	down	down		down
Q23635	CELE_ZK84.1	Uncharacterized protein	WBGene00022649	0.169	0.125	0.293	0.085	0.254			up
Q23642	CELE_ZK856.7	Uncharacterized protein	WBGene00014108	-0.363	0.005	-0.357	0.249	-0.113	down		down
B3WFW5	CELE_ZK858.6	Transmembrane 9 superfamily member	WBGene00014119	-0.377	0.059	-0.318	0.254	-0.123	down		down
Q94416	CELE_ZK858.7	tRNA (adenine(58)-N(1))-methyltransferase non-catalytic subunit TRM6	WBGene00014120	2.295	-0.172	2.124	0.073	2.369	up		up		up
Q23660	CELE_ZK899.2	Uncharacterized protein	WBGene00014141	-0.666	0.014	-0.652	-0.002	-0.668	down		down		down
O18307	CELE_ZK909.3	HD domain-containing protein	WBGene00014148	0.007	-0.001	0.006	-0.017	-0.01
Q7YTT9	CELE_ZK909.6	Uncharacterized protein	WBGene00014150	-0.098	-0.1	-0.197	-0.561	-0.659
Q23683	CELE_ZK970.7	DUF148 domain-containing protein	WBGene00014173	2.195	-1.983	0.213	-1.508	0.687	up	down
Q9N4L5	CELE_ZK973.1	S1 motif domain-containing protein	WBGene00022830	0.37	-0.14	0.23	0.562	0.932					up
Q9N4L6	CELE_ZK973.11	Thioredoxin domain-containing protein	WBGene00022836	0.064	-0.116	-0.052	-0.074	-0.01
G5EC25	cept-2	Choline/EthanolaminePhosphoTransferase	WBGene00013024	-0.713	0.317	-0.396	0.311	-0.402	down	up	down		down
Q9TZI1	cerk-1	Ceramide kinase 1	WBGene00020398	0.057	-0.08	-0.023	0.017	0.074
O01302	cest-1.1	Carboxylic ester hydrolase	WBGene00011362	-1.374	-0.909	-2.283	-0.074	-1.448	down	down	down		down
P92016	cest-1.2	Carboxylic ester hydrolase	WBGene00011364	-0.088	-0.402	-0.491	0.11	0.021		down	down
Q18573	cest-10	COesterase domain-containing protein	WBGene00016595	0.346	-0.308	0.038	0.197	0.543	up				up
Q9XW75	cest-12	Carboxyl ESTerase domain containing	WBGene00013540	-1.581	-1.124	-2.705	-0.297	-1.878			down		down
Q8MQ23	cest-13	Carboxylic ester hydrolase	WBGene00010116	0.325	-0.85	-0.525	-0.757	-0.432		down	down	down
Q21266	cest-17	Carboxylic ester hydrolase	WBGene00019477	-0.267	0.157	-0.11	0.103	-0.164	down				down
G5EDJ7	cest-2.1	COesterase domain-containing protein	WBGene00013875	-0.169	-0.215	-0.383	-0.148	-0.316		down	down		down
H9G2Y9	cest-2.2	COesterase domain-containing protein	WBGene00013874	-0.081	0.21	0.129	0.044	-0.037
Q9BL43	cest-25	COesterase domain-containing protein	WBGene00022178	-0.375	-0.416	-0.791	-0.024	-0.399	down	down	down		down
Q86S38	cest-27	Carboxylic ester hydrolase	WBGene00018958	-0.378	-0.218	-0.596	-0.201	-0.579			down		down
Q23009	cest-31	Carboxylic ester hydrolase	WBGene00019653	-0.232	0.03	-0.202	-0.098	-0.33	down		down		down
Q95YC4	cest-32	Carboxylic ester hydrolase	WBGene00016862	-0.148	-0.055	-0.202	0.018	-0.129			down
Q23010	cest-34	Carboxylic ester hydrolase	WBGene00019652	-0.133	-0.82	-0.953	0.166	0.034		down	down
O16497	cest-35.1	Carboxylic ester hydrolase	WBGene00015067	-0.281	0.036	-0.245	0.128	-0.153	down		down
Q95YC3	cest-35.2	Carboxylic ester hydrolase	WBGene00016863	-0.154	-0.069	-0.223	-0.318	-0.472					down
O45083	cest-4	COesterase domain-containing protein	WBGene00015930	-0.214	-0.124	-0.338	-0.014	-0.228	down		down		down
Q17542	cest-5.2	Carboxyl ESTerase domain containing	WBGene00015284	-0.371	-0.074	-0.444	-0.001	-0.372	down		down		down
Q93254	cest-9.1	COesterase domain-containing protein	WBGene00007692	-0.167	-0.287	-0.455	-0.053	-0.22	down	down	down		down
Q8MQC8	cest-9.2	Carboxylic ester hydrolase	WBGene00007695	-0.121	0.217	0.096	0.212	0.091
Q10131	cex-1	Calexcitin-1	WBGene00023407	0.241	-0.329	-0.088	-0.184	0.057
O62213	cey-1	CSD domain-containing protein	WBGene00000472	0.162	0.035	0.197	0.082	0.244	up		up		up
G5EDV3	cey-4	CSD domain-containing protein	WBGene00000475	0.265	-0.018	0.247	-0.1	0.165	up		up		up
Q93716	cfim-1	Cleavage and polyadenylation specificity factor subunit 5	WBGene00009668	-0.055	-0.134	-0.189	-0.096	-0.152
C1P629	cfim-2	Cleavage Factor IM (CFIm) homolog	WBGene00008362	-0.029	-0.39	-0.419	0.265	0.236
Q95YF3	cgh-1	ATP-dependent RNA helicase cgh-1	WBGene00000479	0.055	0.039	0.094	0.012	0.066
Q18905	cgp-1	GTP-binding protein cgp-1	WBGene00000480	-0.23	-0.305	-0.536	0.315	0.085		down	down	up
Q22824	cgr-1	CRAL/TRIO and GOLD domain suppressor of activated Ras	WBGene00020847	-0.185	0.352	0.167	0.166	-0.019	down	up
Q21054	cgt-3	Ceramide glucosyltransferase 3	WBGene00019127	-0.445	0.154	-0.29	-0.314	-0.759
H2L0H3	chat-1	CDC50 family protein chat-1	WBGene00019946	0.003	-0.084	-0.081	-0.065	-0.062
P34574	chc-1	Probable clathrin heavy chain 1	WBGene00011867	0.071	-0.133	-0.062	-0.1	-0.029		down
Q21551	chch-3	MICOS complex subunit MIC19	WBGene00010942	-0.252	0.109	-0.143	0.029	-0.223	down				down
Q18429	chdh-1	Choline dehydrogenase	WBGene00007917	-0.203	0.404	0.201	0.098	-0.104	down	up	up
P91027	chdp-1	Calponin-homology (CH) domain-containing protein	WBGene00015687	0.111	-0.557	-0.446	-0.238	-0.127		down	down
Q09EF7	che-10	Rootletin	WBGene00018051	-0.115	-0.144	-0.259	0.026	-0.089			down
Q18607	chil-10	Glyco_hydro_18 domain-containing protein	WBGene00016642	-0.193	-0.104	-0.296	-0.147	-0.34	down		down		down
Q9TZF2	chil-24	Glyco_18 domain-containing protein	WBGene00020407	-0.55	-0.173	-0.723	0.023	-0.527	down		down		down
G5EEI8	chp-1	Cysteine and histidine-rich domain-containing protein 1	WBGene00000502	-0.098	0.033	-0.064	-0.005	-0.103
Q23643	chpf-1	Calcineurin-like EF-Hand Protein Family member	WBGene00014109	0.347	0.094	0.441	0.042	0.389	up		up		up
Q18143	cht-3	Chitinase-like protein C25A8.4	WBGene00016084	0.028	-0.273	-0.245	-0.494	-0.466				down	down
Q965P2	cht-4	Glyco_18 domain-containing protein	WBGene00021252	-0.144	0	-0.144	0.573	0.429				up	up
Q09409	cid-1	4Fe-4S ferredoxin-type domain-containing protein	WBGene00019629	0.035	-0.162	-0.127	-0.029	0.006
Q94261	cif-1	COP9/Signalosome and eIF3 complex-shared subunit 1	WBGene00019543	0.287	-0.037	0.249	0.043	0.33	up		up		up
A7LPG5	cisd-1	ZnF_CDGSH domain-containing protein	WBGene00044026	0.409	0.178	0.587	-0.007	0.401	up		up		up
Q9U3A1	cisd-3.1	CDGSH Iron Sulfur Domain protein homolog	WBGene00010909	0.004	0.454	0.458	0.285	0.289
Q9BKQ9	cisd-3.2	CDGSH Iron Sulfur Domain protein homolog	WBGene00022053	0.089	-0.524	-0.435	0.132	0.221		down	down
O17610	cka-1	Choline Kinase A	WBGene00000509	-0.021	-0.578	-0.599	-0.231	-0.252		down	down	down	down
P46558	ckb-1	Choline kinase B1	WBGene00000511	-0.019	0.03	0.011	0.03	0.011
P46559	ckb-2	Choline kinase B2	WBGene00000512	-0.27	-0.214	-0.484	-0.014	-0.284	down		down		down
Q9GZF3	ckb-4	Choline Kinase B	WBGene00000514	-0.469	-0.064	-0.533	-0.097	-0.566	down		down		down
Q22820	ckc-1	Choline Kinase C	WBGene00000515	-0.401	0.058	-0.343	0.068	-0.333	down		down		down
Q9U2D2	cku-70	ATP-dependent DNA helicase 2 subunit 1	WBGene00000519	-0.195	0.248	0.053	0.172	-0.023
G5EFQ6	cld-9	CUB_2 domain-containing protein	WBGene00009432	-0.237	-0.475	-0.711	-0.464	-0.7
G5EGA4	cle-1	Endostatin domain-containing protein	WBGene00000527	0.652	-1.943	-1.291	-0.74	-0.088	up	down	down	down
Q22966	clec-1	C-type lectin domain-containing protein	WBGene00017772	-0.303	0.722	0.419	0.889	0.586		up		up	up
O18202	clec-146	C-type lectin domain-containing protein	WBGene00013008	-0.118	-0.357	-0.475	-0.456	-0.574					down
O44871	clec-150	C-type lectin domain-containing protein	WBGene00019914	-0.394	0.493	0.1	-0.316	-0.709					down
Q4R111	clec-173	C-type lectin domain-containing protein	WBGene00044469	-1.311	0.778	-0.533	-0.439	-1.749	down				down
Q22591	clec-178	C-type lectin domain-containing protein	WBGene00020585	-0.128	-0.596	-0.724	-0.185	-0.314		down	down
O02343	clec-186	C-type LECtin	WBGene00014138	-0.412	0.133	-0.28	0.291	-0.122
G5EBG4	clec-209	C-type lectin domain-containing protein	WBGene00018910;WBGene00021224	-1.514	1.391	-0.123	0.09	-1.424	down	up			down
Q4W528	clec-218	C-type LECtin	WBGene00020938	-0.74	0.816	0.076	-0.664	-1.404	down	up			down
O17562	clec-223	C-type LECtin	WBGene00007282	-1.678	1.078	-0.6	0.739	-0.939	down
Q9NAK5	clec-4	C-type LECtin	WBGene00012583	-0.221	1.495	1.274	0.081	-0.141		up	up
P90732	clec-41	C-type LECtin	WBGene00007153	-0.717	-0.292	-1.008	-0.33	-1.046			down		down
Q18492	clec-5	C-type LECtin	WBGene00016450	-0.394	-1.55	-1.943	-1.005	-1.399		down	down		down
Q9XUL7	clec-50	C-type LECtin	WBGene00012253	-0.732	0.567	-0.165	-0.077	-0.809	down				down
Q19230	clec-56	C-type LECtin	WBGene00008595	0.15	-0.223	-0.073	-0.194	-0.044
Q19229	clec-57	C-type LECtin	WBGene00008594	-1.791	1.105	-0.686	1.057	-0.733	down
O45441	clec-62	VWFA domain-containing protein	WBGene00009393	-0.529	0.374	-0.155	0.235	-0.293
O45444	clec-63	C-type LECtin	WBGene00009394	-0.183	0.972	0.789	0.576	0.393		up	up
O45443	clec-65	C-type LECtin	WBGene00009396	-0.409	0.425	0.016	-0.18	-0.589					down
O45445	clec-66	C-type LECtin	WBGene00009397	-0.441	1.012	0.57	0.058	-0.383		up
Q8ITX4	clec-67	C-type lectin domain-containing protein	WBGene00018971	-0.096	0.334	0.238	-0.411	-0.507					down
Q95XX5	clec-80	C-type lectin domain-containing protein	WBGene00043062	-0.724	-0.336	-1.06	-0.677	-1.402	down		down	down	down
Q9N3B9	clec-83	C-type lectin domain-containing protein	WBGene00021879	-0.252	0.319	0.068	-0.343	-0.595
Q8WTL2	clec-84	C-type lectin domain-containing protein	WBGene00021895	-0.413	0.717	0.304	-0.863	-1.276					down
Q95XX2	clec-85	C-type lectin domain-containing protein	WBGene00021872	-1.675	1.254	-0.421	0.238	-1.437	down	up			down
A0A8D9MJW7	clh-1	Chloride channel protein		0.098	-0.28	-0.182	-0.029	0.069		down	down
G5EGT4	clh-5	Chloride channel protein	WBGene00000532	0.316	-0.15	0.167	-0.045	0.271	up				up
G5EC75	clh-6	Chloride channel protein	WBGene00000533	-0.002	-0.047	-0.049	-0.068	-0.07
P90961	clic-1	Clathrin light chain	WBGene00020246	0.112	-0.09	0.022	0.022	0.134					up
Q23050	clik-1	CaLponIn-liKe proteins	WBGene00020808	0.169	-0.038	0.131	0.135	0.303	up				up
O61848	clik-3	CaLponIn-liKe proteins	WBGene00019361	0.28	-0.162	0.118	0.01	0.289	up				up
P48376	clk-1	5-demethoxyubiquinone hydroxylase, mitochondrial	WBGene00000536	0.143	0.379	0.521	-0.118	0.025		up	up
P34308	clp-1	Calpain clp-1	WBGene00000542	-0.168	-0.046	-0.213	0.064	-0.104	down		down
Q8IAA9	clp-4	Calpain catalytic domain-containing protein	WBGene00000545	0.297	-0.575	-0.278	-0.353	-0.056	up	down	down	down
Q9N4B1	clp-7	Calpain catalytic domain-containing protein	WBGene00000547	-0.407	-0.022	-0.428	0.151	-0.256	down		down	up	down
Q27539	clpp-1	ATP-dependent Clp protease proteolytic subunit 1, mitochondrial	WBGene00014172	-0.218	0.673	0.455	0.001	-0.217	down	up	up		down
P32744	cls-2	Protein CLASP-2	WBGene00000549	0.103	0.004	0.107	0.135	0.239					up
P34466	clu-1	Clustered mitochondria protein homolog	WBGene00000550	0.782	0.284	1.066	-0.055	0.728	up	up	up		up
O16305	cmd-1	Calmodulin	WBGene00000552	-0.132	-0.119	-0.251	-0.013	-0.146	down		down		down
G5EDN6	cnb-1	Protein phosphatase 2B regulatory subunit cnb-1	WBGene00000554	-0.313	-0.06	-0.372	0.229	-0.083	down		down	up
O44611	cnc-2	CaeNaCin (Caenorhabditis bacteriocin)	WBGene00000556	0.358	-0.172	0.186	-0.433	-0.075
O44613	cnc-4	CaeNaCin (Caenorhabditis bacteriocin)	WBGene00000558	0.871	-0.931	-0.06	-0.818	0.054
Q9N3V6	cnc-6	CaeNaCin (Caenorhabditis bacteriocin)	WBGene00000560	2.038	-0.876	1.162	-1.071	0.967	up
Q9XVW3	cnc-8	CaeNaCin (Caenorhabditis bacteriocin)	WBGene00009624	0.219	0.268	0.487	-0.085	0.134			up
Q20432	cnep-1	CTD nuclear envelope phosphatase 1 homolog	WBGene00018474	0.041	-0.056	-0.015	-0.107	-0.066
Q22361	cni-1	Protein cornichon homolog 1	WBGene00011648	0.148	0.077	0.225	-0.099	0.048
A3QM97	cnnm-1	Metal transporter cnnm-1	WBGene00016879	-0.195	0.127	-0.067	0.128	-0.067	down	up		up
A0A131MCZ8	cnnm-3	Metal transporter cnnm-3	WBGene00016343	-0.139	-0.304	-0.443	-0.121	-0.26
Q9U2D6	cnp-2	Calcineurin-interacting protein 2	WBGene00012901	-0.17	-0.016	-0.186	-0.116	-0.286					down
Q9XXH8	cnt-1	Arf-GAP with ANK repeat and PH domain-containing protein cnt-1	WBGene00000565	-0.275	-0.127	-0.402	-0.089	-0.364	down		down		down
P34652	cnx-1	Calnexin	WBGene00000567	0.164	-0.04	0.124	-0.059	0.105
D6RYE0	coa-1	Cytochrome Oxidase Assembly subunits	WBGene00195063	0.281	0.057	0.338	-0.114	0.167	up		up
Q20033	coa-3	Cytochrome c oxidase assembly factor 3	WBGene00018046	1.108	0.238	1.346	-0.293	0.815	up	up	up	down	up
O01255	coa-4	Cytochrome Oxidase Assembly subunits	WBGene00011857	0.43	0.125	0.555	0.039	0.469	up		up		up
Q23450	coa-7	Cytochrome c oxidase assembly factor 7 homolog	WBGene00013925	0.226	0.227	0.453	-0.273	-0.047			up
G5EE66	cogc-1	Conserved oligomeric Golgi complex subunit 1	WBGene00003258	-0.053	-0.103	-0.155	-0.079	-0.132
Q21444	cogc-2	Conserved oligomeric Golgi complex subunit 2	WBGene00000585	0.146	-0.237	-0.091	-0.066	0.08
Q6AW08	cogc-3	Conserved oligomeric Golgi complex subunit 3	WBGene00022121	-0.03	0.037	0.007	0.065	0.035
Q95XZ0	cogc-4	Conserved oligomeric Golgi complex subunit 4	WBGene00021784	-0.111	-0.021	-0.132	0.129	0.018
P91151	cogc-5	Conserved oligomeric Golgi complex subunit 5	WBGene00016608	-0.041	-0.019	-0.06	-0.076	-0.117
Q21270	cogc-6	Conserved oligomeric Golgi complex subunit 6	WBGene00019481	0.06	-0.032	0.027	0.034	0.094
O44502	cogc-8	Conserved oligomeric Golgi complex subunit 8	WBGene00019820	0.259	-0.233	0.026	-0.176	0.083	up	down
O45105	col-101	Col_cuticle_N domain-containing protein	WBGene00000675	0.552	1.488	2.039	0.784	1.335	up	up	up	up	up
Q8MXT6	col-106	Col_cuticle_N domain-containing protein	WBGene00000680	0.281	1.397	1.678	0.908	1.189		up	up	up	up
Q18799	col-119	Col_cuticle_N domain-containing protein	WBGene00000693	0.259	0.885	1.144	0.183	0.442		up	up
Q22183	col-122	Col_cuticle_N domain-containing protein	WBGene00000696	0.441	1.295	1.736	0.775	1.216		up	up		up
Q19813	col-140	Col_cuticle_N domain-containing protein	WBGene00000713	0.849	0.865	1.714	0.024	0.874	up	up	up		up
O17036;O17038	col-142	Col_cuticle_N domain-containing protein	WBGene00000715	0.531	1.447	1.978	0.731	1.262		up	up		up
Q17417	col-149	Col_cuticle_N domain-containing protein	WBGene00000722	0.387	0.514	0.901	0.559	0.946		up	up		up
Q20921;Q20922	col-160	Col_cuticle_N domain-containing protein	WBGene00000733	1.054	1.546	2.6	0.501	1.555	up	up	up		up
O17641	col-178	Col_cuticle_N domain-containing protein	WBGene00000751	-0.592	1.474	0.882	0.581	-0.011		up
O17642	col-179	Col_cuticle_N domain-containing protein	WBGene00000752	1.483	2.305	3.788	1.024	2.507	up	up	up		up
Q23150	col-181	Col_cuticle_N domain-containing protein	WBGene00000754	1.126	1.522	2.648	0.72	1.846	up	up	up		up
Q19470	col-184	Col_cuticle_N domain-containing protein	WBGene00000757	0.179	0.129	0.308	0.141	0.321
P18835	col-19	Cuticle collagen 19	WBGene00000608	0.316	0.359	0.675	0.193	0.509			up
P91249	col-20	Col_cuticle_N domain-containing protein	WBGene00000609	-0.01	1.168	1.159	0.18	0.17		up	up
Q8I4C0	col-42	Col_cuticle_N domain-containing protein	WBGene00013489	0.82	1.399	2.219	0.65	1.47		up	up		up
P18833	col-8	Cuticle collagen 8	WBGene00000597	0.268	0.068	0.337	-0.217	0.052			up
Q9U348;Q9U349;Q9XUE9;Q9XVG3	col-93	Col_cuticle_N domain-containing protein	WBGene00000668	2.619	1.813	4.431	0.377	2.996	up	up	up		up
Q86MP1	col-95	Col_cuticle_N domain-containing protein	WBGene00000670	0.819	1.198	2.017	0.75	1.57	up	up	up		up
O17805	col-98	Col_cuticle_N domain-containing protein	WBGene00000673	0.038	1.648	1.686	0.809	0.846		up	up	up	up
Q9XXH0	comt-2	Catechol-O-MethylTransferase family	WBGene00012518	0.241	0.002	0.242	-0.082	0.159
Q965W3	comt-3	Catechol-O-MethylTransferase family	WBGene00021487	-0.714	0.543	-0.17	0.438	-0.275	down	up		up
Q965W4	comt-4	Catechol-O-MethylTransferase family	WBGene00021491	-1.032	0.984	-0.048	1.533	0.501	down	up		up
Q9N4H7	copa-1	Coatomer subunit alpha	WBGene00022119	0.155	0.05	0.205	-0.006	0.149	up		up		up
Q9TYL9	copb-1	Coatomer subunit beta	WBGene00021292	0.064	0.069	0.132	0.082	0.146			up		up
Q20168	copb-2	Probable coatomer subunit beta'	WBGene00009542	0.09	0.078	0.168	0.014	0.104			up
Q09236	copd-1	Probable coatomer subunit delta	WBGene00015734	0.067	0.018	0.084	0.031	0.098
O62246	cope-1	Coatomer subunit epsilon	WBGene00009732	-0.092	0.194	0.101	0.224	0.132
Q22498	copg-1	Probable coatomer subunit gamma	WBGene00011775	-0.005	0.032	0.027	0.096	0.091
O17901	copz-1	Probable coatomer subunit zeta	WBGene00010333	-0.216	0.078	-0.138	0.272	0.056
P91093	coq-1	COenzyme Q (Ubiquinone) biosynthesis	WBGene00000761	-0.238	0.494	0.256	0.042	-0.196	down	up	up		down
O18235	coq-3	Ubiquinone biosynthesis O-methyltransferase, mitochondrial	WBGene00000763	0.209	0.225	0.434	-0.147	0.062	up	up	up
P91428	coq-4	Ubiquinone biosynthesis protein coq-4, mitochondrial	WBGene00000764	0.002	0.271	0.274	-0.16	-0.158		up	up
P34666	coq-5	2-methoxy-6-polyprenyl-1,4-benzoquinol methylase, mitochondrial	WBGene00000765	0.259	0.353	0.612	-0.085	0.175	up	up	up		up
O01884	coq-6	Ubiquinone biosynthesis monooxygenase COQ6, mitochondrial	WBGene00000766	0.06	0.205	0.266	-0.201	-0.14		up	up	down	down
Q18486	coq-8	Atypical kinase coq-8, mitochondrial	WBGene00000767	0.06	0.386	0.447	-0.007	0.053		up	up
Q21624	cor-1	Coronin-like protein cor-1	WBGene00000768	0.575	-0.074	0.5	-0.013	0.562	up		up		up
K8ES01	cox-10	Heme O synthase	WBGene00012895	1.425	1.135	2.56	-0.604	0.821	up	up	up		up
Q95QD5	cox-11	Cytochrome OXidase assembly protein	WBGene00010437	0.195	0.38	0.575	0.144	0.339		up	up		up
G5EFL2	cox-14	Cytochrome OXidase assembly protein	WBGene00011875	1.046	-0.295	0.751	-0.219	0.827	up
Q22251	cox-15	Cytochrome OXidase assembly protein	WBGene00011526	0.697	0.548	1.246	-0.011	0.686	up	up	up		up
Q9TZ68	cox-17	Cytochrome OXidase assembly protein	WBGene00018240	0.594	0.532	1.126	0.122	0.716	up	up	up		up
Q9N356	cox-18	Cytochrome OXidase assembly protein	WBGene00021932	0.24	0.097	0.337	-0.312	-0.072	up		up	down
Q9U329	cox-4	Cytochrome c oxidase subunit 4	WBGene00012354	0.392	-0.463	-0.072	0.169	0.56	up	down			up
P55954	cox-5A	Cytochrome c oxidase subunit 5A, mitochondrial	WBGene00012553	0.455	-0.558	-0.103	-0.008	0.447	up	down			up
P90849	cox-5b	Cytochrome OXidase assembly protein	WBGene00000371	0.373	-0.503	-0.13	0.056	0.429	up	down			up
Q20779	cox-6A	Cytochrome c oxidase subunit 6A, mitochondrial	WBGene00006519	0.045	-0.478	-0.433	0.094	0.14		down	down
Q9BL34	cox-6b	Cytochrome OXidase assembly protein	WBGene00022170	0.277	-0.661	-0.385	0.051	0.328	up	down	down		up
O76367	cox-6c	COX6C domain-containing protein	WBGene00017926	0.081	-0.558	-0.477	0.209	0.29		down	down		up
O18687	cox-7c	Cytochrome c oxidase polypeptide VIIc	WBGene00009161	0.043	-0.537	-0.495	0.409	0.452		down	down	up	up
P91359	cpd-1	Carboxypeptidase D	WBGene00019074	0.161	0.168	0.329	0.024	0.185			up
Q19864	cpf-1	Cleavage stimulation factor 50 kDa subunit	WBGene00000773	0.009	0.136	0.145	-0.188	-0.18
O45577	cpf-2	RRM domain-containing protein	WBGene00000774	-0.001	-0.073	-0.074	0.071	0.07
G5EDZ9	cpi-1	Cystatin cpi-1	WBGene00000535	-0.338	0.013	-0.325	0.226	-0.112	down		down
G5ECM9	cpi-2	Cystatin cpi-2	WBGene00000534	-0.453	0.046	-0.407	0.034	-0.42	down		down		down
Q20166	cpin-1	Amidohydro-rel domain-containing protein	WBGene00000775	-0.317	0.197	-0.12	0.142	-0.175	down	up			down
O45734	cpl-1	Cathepsin L-like	WBGene00000776	-0.365	0.182	-0.184	-0.233	-0.599	down				down
G5EFB5	cpn-1	CPN-1	WBGene00000777	-0.039	-0.091	-0.13	0.054	0.015
O01542	cpn-3	Calponin-homology (CH) domain-containing protein	WBGene00000779	-0.043	0.018	-0.025	0.008	-0.036
O44727	cpn-4	Calponin-homology (CH) domain-containing protein	WBGene00000780	-0.25	-0.105	-0.354	0.349	0.1	down		down	up
H2KYS8	cpna-1	Copine family protein 1	WBGene00006495	-0.002	-0.131	-0.133	0.043	0.041			down
Q09221	cpna-2	Copine family protein 2	WBGene00015061	0.088	-0.099	-0.011	-0.007	0.081
Q17559	cpna-3	VWFA domain-containing protein	WBGene00007221	0.003	-0.271	-0.268	-0.217	-0.213
P25807	cpr-1	Gut-specific cysteine proteinase	WBGene00000781	-1.375	-0.565	-1.939	-0.2	-1.574	down		down		down
P43507	cpr-3	Cathepsin B-like cysteine proteinase 3	WBGene00000783	-0.276	-0.026	-0.302	-0.128	-0.404	down		down		down
P43508	cpr-4	Cathepsin B-like cysteine proteinase 4	WBGene00000784	-0.531	1.117	0.586	-0.207	-0.738		up	up		down
P43509	cpr-5	Cathepsin B-like cysteine proteinase 5	WBGene00000785	-0.785	-0.59	-1.375	-1.118	-1.903			down	down	down
P43510	cpr-6	Cathepsin B-like cysteine proteinase 6	WBGene00000786	-0.972	-0.026	-0.998	-0.086	-1.058	down		down		down
O16289	cpr-8	Pept_C1 domain-containing protein	WBGene00021070	-1.141	-0.655	-1.796	-0.633	-1.774	down		down		down
Q20950	cpr-9	Pept_C1 domain-containing protein	WBGene00010204	-1.024	0.483	-0.54	-0.624	-1.647	down		down		down
Q95NM6	cps-6	Endonuclease G, mitochondrial	WBGene00000787	0.473	0.419	0.892	-0.196	0.277	up	up	up		up
Q9U2F2	cpt-1	Carnitine O-palmitoyltransferase	WBGene00012907	0.335	-0.538	-0.202	-0.213	0.122	up	down	down	down
G5ECS9	cpt-2	Calponin-homology (CH) domain-containing protein	WBGene00011122	-0.186	0.007	-0.179	-0.257	-0.443	down		down	down	down
G5EG54	cpt-5	Carn_acyltransf domain-containing protein	WBGene00008629	-0.083	0.087	0.004	-0.161	-0.244					down
Q9GUM7	cpx-1	Putative complexin-1	WBGene00022271	-0.542	-0.006	-0.548	0.241	-0.301	down		down		down
G5EGP8	cpz-1	Cathepsin Z-1	WBGene00000788	-0.324	-0.022	-0.346	-0.176	-0.5	down		down		down
P92005	cpz-2	Cathepsin X	WBGene00000789	-0.359	0.022	-0.338	0.297	-0.063	down		down	up
Q21986	cra-1	N-terminal acetyltransferase B complex subunit NAA25 homolog	WBGene00020068	0.445	-0.024	0.421	0.019	0.463	up		up		up
Q21018	cri-3	Conserved regulator of innate immunity protein 3	WBGene00010303	0.884	0.662	1.546	-0.049	0.836	up	up	up		up
O01916	crls-1	Probable cardiolipin synthase (CMP-forming)	WBGene00017763	-0.22	0.209	-0.011	0.002	-0.217
Q21301	crml-1	Carm_PH domain-containing protein	WBGene00010641	0.055	-0.186	-0.131	-0.112	-0.058		down
G5EG18	crn-2	Cell death-related nuclease 2	WBGene00000795	0.319	-0.031	0.288	0.272	0.591					up
G5EBX6	crn-3	Cell death-related nuclease 3	WBGene00000796	0.378	0.028	0.406	-0.062	0.316
Q10905	crn-4	Cell death-related nuclease 4	WBGene00000797	0.166	-0.478	-0.312	-0.243	-0.077		down	down
G5EG59	crn-5	Cell death-related nuclease 5	WBGene00000798	0.811	-0.061	0.75	0.025	0.835	up		up		up
P34387	crn-7	Cell-death-related nuclease 7	WBGene00007056	0.302	-0.176	0.126	-0.1	0.203	up	down			up
P27798	crt-1	Calreticulin	WBGene00000802	0.18	-0.031	0.148	-0.046	0.133
Q9GS00	csn-1	COP9 signalosome complex subunit 1	WBGene00000813	-0.038	-0.115	-0.153	-0.064	-0.102			down
O01422	csn-2	COP9 signalosome complex subunit 2	WBGene00000814	-0.027	-0.055	-0.082	0.039	0.012
Q9N425	csn-3	COP9 signalosome complex subunit 3	WBGene00000815	-0.025	0.013	-0.012	-0.043	-0.068
Q9N359	csn-4	COP9 signalosome complex subunit 4	WBGene00000816	-0.149	-0.045	-0.194	0.074	-0.074	down		down
P91001	csn-5	COP9 signalosome complex subunit 5	WBGene00000817	-0.073	-0.072	-0.145	0.011	-0.062
Q95PZ0	csn-6	COP9 signalosome complex subunit 6	WBGene00000818	-0.041	-0.008	-0.049	0.021	-0.02
Q8WQ99	csnk-1	Casein kinase I gamma	WBGene00013709	0.082	-0.2	-0.118	-0.12	-0.038		down
Q20203	csq-1	Calsequestrin	WBGene00000822	0.128	-0.255	-0.127	0.028	0.156		down
H2KZD5	csr-1	Piwi domain-containing protein	WBGene00017641	-0.241	-0.385	-0.625	-0.166	-0.407		down	down		down
Q9NB31	cst-1	Serine/threonine-protein kinase cst-1	WBGene00017472	-0.102	-0.099	-0.201	-0.122	-0.223			down		down
P24893	ctc-1	Cytochrome c oxidase subunit 1	WBGene00010964	-0.654	-0.427	-1.081	0.476	-0.178	down		down
P24894	ctc-2	Cytochrome c oxidase subunit 2	WBGene00010965	-0.696	0.033	-0.663	0.905	0.209
O17907	ctg-1	Protein ctg-1	WBGene00010370	-0.575	-0.219	-0.794	0.011	-0.564	down	down	down		down
Q22467	ctg-2	CRAL/TRIO and GOLD domain containing	WBGene00011756	-0.434	-0.28	-0.714	0.144	-0.29	down		down
O45391	cth-1	Cystathionine gamma-lyase	WBGene00009048	0.126	0.583	0.709	0.06	0.187		up	up
P55216	cth-2	Putative cystathionine gamma-lyase 2	WBGene00022856	0.495	0.529	1.024	-0.105	0.39			up
O61235	ctl-1	Catalase-2	WBGene00000830	1.246	0.198	1.445	0.386	1.633	up		up	up	up
Q27487	ctl-2	Peroxisomal catalase 1	WBGene00000831	-0.606	0.633	0.027	0.549	-0.057	down	up		up
Q8MYL7	ctl-3	Catalase	WBGene00013220	0.063	0.224	0.287	-0.166	-0.103
H2L011	ctn-1	Alpha-CaTuliN (Catenin/vinculin related)	WBGene00000832	-0.068	-0.61	-0.678	-0.064	-0.132			down
P91401	ctnb-1	DUF1716 domain-containing protein	WBGene00019711	0.091	-0.046	0.045	0.182	0.274
Q09500	ctns-1	Cystinosin homolog	WBGene00008052	-0.74	-0.131	-0.872	0.573	-0.167	down		down
G5EC98	ctps-1	CTP synthase	WBGene00012316	1.279	0.277	1.556	0.181	1.46	up	up	up		up
P34575	cts-1	Probable citrate synthase, mitochondrial	WBGene00000833	0.064	0.467	0.532	0.022	0.086		up	up
P52717	ctsa-1.1	Serine carboxypeptidase ctsa-1.1	WBGene00018271	-0.15	-1.09	-1.241	-0.377	-0.528		down	down		down
P52715	ctsa-1.2	Serine carboxypeptidase ctsa-1.2	WBGene00008741	-1.362	1.007	-0.355	-0.343	-1.705	down	up			down
Q94269	ctsa-2	Carboxypeptidase	WBGene00019617	-0.143	0.175	0.031	0.334	0.191
P52716	ctsa-3.1	Serine carboxypeptidase ctsa-3.1	WBGene00017969	-0.003	0.109	0.106	0.097	0.094
Q09991	ctsa-4.1	Serine carboxypeptidase ctsa-4.1	WBGene00019605	-0.174	-0.668	-0.842	-0.782	-0.956		down	down	down	down
O76725	ctsa-4.2	Carboxypeptidase	WBGene00021503	-0.236	0.061	-0.175	-0.056	-0.293
G5EE14	cua-1	P-type Cu(+) transporter	WBGene00000834	0.01	0.095	0.105	-0.155	-0.145
Q20911	cubn-1	Cubilin homolog	WBGene00013855	-0.089	-0.298	-0.387	-0.218	-0.307		down	down	down	down
G5EE41	cuc-1	Copper chaperone	WBGene00000835	-0.562	0.471	-0.091	-0.175	-0.737	down	up			down
Q17389	cul-1	Cullin-1	WBGene00000836	-0.146	-0.216	-0.362	-0.133	-0.28	down	down	down		down
Q17390	cul-2	Cullin-2	WBGene00000837	-0.114	-0.234	-0.348	-0.008	-0.122		down	down		down
Q17391	cul-3	Cullin-3	WBGene00000838	-0.097	-0.132	-0.228	-0.03	-0.127			down
Q17392	cul-4	Cullin-4	WBGene00000839	0.316	-0.343	-0.027	0.402	0.718
K8ESM7	cup-14	RUN domain-containing protein	WBGene00013093	0.17	-0.131	0.039	-0.043	0.127
Q93561	cup-2	Derlin-1	WBGene00000843	-0.159	-0.078	-0.236	-0.053	-0.211
P34271	cup-4	Acetylcholine receptor-like protein cup-4	WBGene00000845	-0.237	-0.161	-0.398	0.068	-0.169	down		down
P34630	cutc-1	Copper homeostasis protein cutC homolog	WBGene00022702	-0.194	0.032	-0.162	-0.083	-0.277	down				down
Q18853	cyc-1	Cytochrome c domain-containing protein	WBGene00000869	0.509	0.651	1.16	0.15	0.66	up	up	up		up
P19974	cyc-2.1	Cytochrome c 2.1	WBGene00017121	0.069	1.205	1.274	0.265	0.334		up	up	up	up
A0A7R9SUL6	cyh-1	CYclin H		-0.316	-0.073	-0.39	-0.096	-0.413
Q7JP75	cyk-1	CYtoKinesis defect	WBGene00000872	0.101	-0.246	-0.145	-0.077	0.024
Q8WT44	cyk-3	Ubiquitin carboxyl-terminal hydrolase cyk-3	WBGene00000874	-0.08	-0.101	-0.181	-0.034	-0.114
Q7JMS4	cyld-1	USP domain-containing protein	WBGene00009594	-0.12	-0.166	-0.286	-0.119	-0.239			down		down
P52009	cyn-1	Peptidyl-prolyl cis-trans isomerase 1	WBGene00000877	0.879	0.49	1.369	0.205	1.084	up	up	up	up	up
P52017	cyn-10	Peptidyl-prolyl cis-trans isomerase 10	WBGene00000886	0.345	-0.395	-0.05	-0.079	0.267
P52018	cyn-11	Peptidyl-prolyl cis-trans isomerase 11	WBGene00000887	0.352	-0.137	0.215	0.058	0.41
Q18445	cyn-12	Peptidyl-prolyl cis-trans isomerase	WBGene00000888	0.297	-0.018	0.279	-0.034	0.263
Q9U2S6	cyn-13	Peptidyl-prolyl cis-trans isomerase E	WBGene00000889	0.081	-0.072	0.009	-0.065	0.016
Q9U1Q3	cyn-15	PPIase cyclophilin-type domain-containing protein	WBGene00000891	0.063	-0.005	0.058	0.238	0.301					up
Q9XXI7	cyn-16	PPIase cyclophilin-type domain-containing protein	WBGene00000892	0.565	-0.105	0.46	0.112	0.677					up
P52011	cyn-3	Peptidyl-prolyl cis-trans isomerase 3	WBGene00000879	-0.259	0.067	-0.192	0.274	0.014
P52013	cyn-5	Peptidyl-prolyl cis-trans isomerase 5	WBGene00000881	0.427	0.122	0.549	-0.081	0.346	up		up		up
P52014	cyn-6	Peptidyl-prolyl cis-trans isomerase 6	WBGene00000882	0.592	-0.406	0.185	-0.303	0.288	up	down			up
P52015	cyn-7	Peptidyl-prolyl cis-trans isomerase 7	WBGene00000883	-0.05	0.081	0.031	0.137	0.087
O17806	cyp-13a11	CYtochrome P450 family	WBGene00008809	-0.86	0.283	-0.577	0.524	-0.336	down
Q27505	cyp-14a2	CYtochrome P450 family	WBGene00010706	-0.466	1.026	0.561	0.671	0.205		up	up	up
Q27507	cyp-14a3	CYtochrome P450 family	WBGene00010707	-0.453	0.908	0.455	0.64	0.187	down	up	up	up
Q27531	cyp-14a5	CYtochrome P450 family	WBGene00000373	-0.067	0.435	0.368	0.468	0.401
Q27477	cyp-25a1	CYtochrome P450 family	WBGene00007963	0.05	0.117	0.168	-0.139	-0.088
Q27476	cyp-25a2	CYtochrome P450 family	WBGene00007964	-0.551	0.297	-0.254	0.214	-0.336	down	up	down		down
Q1HB05	cyp-25a3	CYtochrome P450 family	WBGene00014697	-0.447	0.322	-0.125	0.299	-0.147	down	up		up
G5EC97	cyp-29a2	CYtochrome P450 family	WBGene00011830	-0.244	0.401	0.158	0.177	-0.066		up
Q27472	cyp-32a1	CYtochrome P450 family	WBGene00016147	0.229	-0.759	-0.53	-0.281	-0.052
Q9N4Q5	cyp-32b1	CYtochrome P450 family	WBGene00021167	0.246	0.836	1.082	0.094	0.339		up	up
O16673	cyp-33c7	CYtochrome P450 family	WBGene00018260	-0.069	0.122	0.052	0.013	-0.056
O02641	cyp-33c8	CYtochrome P450 family	WBGene00019967	-0.257	0.314	0.057	-0.413	-0.67	down	up		down	down
O16482	cyp-33c9	CYtochrome P450 family	WBGene00016860	-0.113	-0.2	-0.313	-0.163	-0.276			down		down
Q27482	cyp-33e1	CYtochrome P450 family	WBGene00016768	-0.287	-0.013	-0.299	-0.048	-0.335			down		down
Q27499	cyp-33e2	CYtochrome P450 family	WBGene00018334	-0.106	0.077	-0.028	0.034	-0.071
O62377	cyp-34a2	CYtochrome P450 family	WBGene00011699	-0.46	0.293	-0.167	-0.21	-0.67					down
O44658	cyp-34a8	CYtochrome P450 family	WBGene00015043	-0.246	0.75	0.504	0.209	-0.037	down	up	up
H2KY69	cyp-34a9	CYtochrome P450 family	WBGene00015044	-0.494	0.359	-0.135	0.148	-0.346	down	up			down
O02628	cyp-35a2	CYtochrome P450 family	WBGene00015400	0.085	0.612	0.698	0.024	0.109		up	up
Q9N5I1	cyp-35a3	CYtochrome P450 family	WBGene00019565	0.776	0.419	1.194	-0.294	0.482	up	up	up		up
O44650	cyp-35b1	CYtochrome P450 family	WBGene00019472	-0.201	0.528	0.327	0.474	0.274		up	up	up
G5ECD0	cyp-35c1	CYtochrome P450 family	WBGene00007362	-0.062	0.28	0.218	-0.16	-0.222
P90771	cyp-36A1	Probable cytochrome P450 CYP36A1	WBGene00007913	-0.381	0.034	-0.347	0.013	-0.368	down		down		down
Q9XVA6	cyp-37a1	CYtochrome P450 family	WBGene00008499	0.1	0.48	0.579	0.018	0.118		up	up
Q09660	cyp-44A1	Probable cytochrome P450 CYP44	WBGene00000375	0.017	0.273	0.289	-0.02	-0.003		up	up
Q93244	cysl-1	Cysteine synthase 1	WBGene00007653	-0.279	-0.011	-0.29	0.023	-0.256	down		down		down
O45679	cysl-2	Bifunctional L-3-cyanoalanine synthase/cysteine synthase	WBGene00010759	0.095	-0.344	-0.248	-0.511	-0.415				down	down
O01592	cysl-3	Cysteine synthase 3	WBGene00019962	-0.412	-0.085	-0.497	0.069	-0.343	down		down		down
O16284	cysl-4	Cysteine synthase	WBGene00019096	-0.472	0.024	-0.447	0.114	-0.358
Q93315	cytb-5.1	Cytochrome b5 heme-binding domain-containing protein	WBGene00007848	-1.326	1.045	-0.282	1.412	0.086	down	up		up
O01816	cytb-5.2	Cytochrome b5 heme-binding domain-containing protein	WBGene00020931	-0.055	0.48	0.425	0.092	0.037		up	up
Q19642	czw-1	Centromere/kinetochore protein zw10 homolog	WBGene00017643	0.109	-0.034	0.075	-0.08	0.029
P41949	D1044.1	Uncharacterized kinase-like protein D1044.1	WBGene00017027	-0.075	0.127	0.052	0.15	0.074
Q93408	D2005.3	Uncharacterized protein D2005.3	WBGene00008398	-0.121	-0.065	-0.186	-0.002	-0.123
O17731	D2023.4	Thialysine N-epsilon-acetyltransferase	WBGene00008408	-0.43	0.392	-0.038	0.317	-0.113	down	up
P90789	D2030.4	NADH dehydrogenase [ubiquinone] 1 beta subcomplex subunit 7	WBGene00008414	0.163	-0.601	-0.438	0.054	0.217		down	down		up
Q95XG9	daao-1	D-amino-acid oxidase	WBGene00022076	0.011	0.66	0.671	0.108	0.119		up	up
A0A486WXX8	dab-1	PID domain-containing protein	WBGene00000894	-0.037	0.035	-0.003	0.077	0.04
P52872	dad-1	Dolichyl-diphosphooligosaccharide--protein glycosyltransferase subunit dad-1	WBGene00000896	-0.447	0.19	-0.256	0.467	0.02	down
Q68TI8	daf-15	DAF-15	WBGene00000911	-0.045	-0.285	-0.331	-0.041	-0.086		down	down
Q18688	daf-21	Heat shock protein 90	WBGene00000915	0.157	-0.051	0.106	-0.015	0.142	up				up
G5EDP2	daf-22	Non-specific lipid-transfer protein-like 2	WBGene00013284	-0.26	0.389	0.128	0.107	-0.153	down	up
Q9N3Q8	daf-25	Dauer abnormal formation protein 25	WBGene00000917	-0.109	0.145	0.036	0.165	0.056
O61219	daf-31	N-alpha-acetyltransferase daf-31	WBGene00000923	-0.011	-0.026	-0.037	0.026	0.015
Q17938	daf-36	Cholesterol 7-desaturase	WBGene00007536	0.069	0.246	0.314	-0.211	-0.142			up
P50488	daf-4	Cell surface receptor daf-4	WBGene00000900	-0.019	-0.391	-0.41	0.111	0.092
Q23280	daf-41	Co-chaperone protein daf-41	WBGene00022599	0.292	0.041	0.332	0.19	0.482	up		up		up
Q21285	dao-3	Methenyltetrahydrofolate cyclohydrolase	WBGene00000929	-0.576	0.011	-0.565	0.414	-0.162	down		down	up
Q9XVS4	dao-5	Nucleolar protein dao-5	WBGene00000931	1.851	-0.016	1.835	0.01	1.861	up		up		up
G5EFC8	dap-3	Mammalian cell Death Associated Protein related	WBGene00000933	0.748	-0.518	0.23	-0.13	0.618	up	down	up		up
Q03577	dars-1	Aspartate--tRNA ligase, cytoplasmic	WBGene00001094	0.319	0.075	0.394	0.216	0.535	up		up	up	up
P90831	dars-2	AA_TRNA_LIGASE_II domain-containing protein	WBGene00001095	0.257	0.602	0.858	0.128	0.384		up	up
Q9XUT0	dbn-1	DreBriN 1/DreBriN-like (Where Drebrin is from Developmentally REgulated BRaIN protein) family homolog	WBGene00010664	0.043	-0.185	-0.143	0.062	0.105		down	down
Q966M6	dbr-1	Lariat debranching enzyme	WBGene00000937	0.516	-0.039	0.477	-0.087	0.429	up		up		up
Q23571	dbt-1	Lipoamide acyltransferase component of branched-chain alpha-keto acid dehydrogenase complex, mitochondrial	WBGene00014054	0.209	0.386	0.595	-0.091	0.118	up	up	up
Q9N363	dcap-1	mRNA-decapping enzyme 1	WBGene00021929	-0.305	0.055	-0.25	-0.047	-0.353	down		down		down
O62255	dcap-2	m7GpppN-mRNA hydrolase dcap-2	WBGene00003582	0.194	-0.184	0.01	-0.132	0.062
G5EDI0	dcar-1	G_PROTEIN_RECEP_F1_2 domain-containing protein	WBGene00007395	0.247	-0.151	0.096	-0.254	-0.007
Q9U3C8	dcn-1	Defective in cullin neddylation protein 1	WBGene00010428	-0.16	-0.106	-0.266	0.071	-0.089			down
G5ED89	dcp-66	Transcription factor dcp-66	WBGene00000938	-0.051	-0.138	-0.189	0.067	0.016
G5EFS4	dcs-1	m7GpppX diphosphatase	WBGene00000940	-0.039	0.017	-0.022	0.183	0.144
Q23190	dct-11	DAF-16/FOXO Controlled, germline Tumor affecting	WBGene00021060	-0.448	0.212	-0.236	0.608	0.159
Q9XX57	dct-16	DAF-16/FOXO Controlled, germline Tumor affecting	WBGene00012615	-0.533	0.158	-0.375	0.099	-0.434	down		down		down
O02360	dct-17	CUB_2 domain-containing protein	WBGene00009431	0.092	-0.051	0.041	0.368	0.46				up	up
O62277	dct-18	DAF-16/FOXO Controlled, germline Tumor affecting	WBGene00010266	0.267	0.644	0.911	0.145	0.412		up	up		up
Q09313	dct-6	Protein dct-6	WBGene00017773	-0.262	-0.202	-0.464	0	-0.262	down	down	down		down
Q21554	ddb-1	DNA damage-binding protein 1	WBGene00010890	-0.069	-0.021	-0.091	0.102	0.032
Q17569	ddi-1	Protein DDI1 homolog 1	WBGene00015308	0.009	-0.234	-0.224	0.18	0.19
O18195	ddl-2	WASH complex subunit homolog 1	WBGene00013000	0.251	-0.282	-0.031	-0.133	0.118
Q9XW00	ddl-3	Daf-16-Dependent Longevity (WT but not daf-16 lifespan increased)	WBGene00013217	0.035	0.279	0.314	-0.197	-0.162		up	up
Q95Q93	ddn-1	Downstream of Daf-Nineteen	WBGene00015227	0.444	-0.329	0.115	-0.394	0.05
Q19564	ddo-2	D-aspartate oxidase 2	WBGene00017565	1.278	0.47	1.748	-0.201	1.077			up
O01739	ddo-3	D-aspartate oxidase 3	WBGene00017648	1.371	-1.286	0.085	0.367	1.738	up	down			up
Q9N408	ddp-1	Mitochondrial import inner membrane translocase subunit Tim8	WBGene00000941	0.497	0.392	0.889	-0.061	0.435	up	up	up		up
Q9N478	ddx-10	RNA helicase	WBGene00021277	0.858	-0.211	0.647	0.079	0.937	up		up		up
Q20875	ddx-15	Pre-mRNA-splicing factor ATP-dependent RNA helicase ddx-15	WBGene00018967	0.429	-0.008	0.42	-0.006	0.422	up		up		up
Q9XUW5	ddx-17	RNA helicase	WBGene00010260	0.753	-0.062	0.691	0.118	0.871	up		up		up
Q22308	ddx-19	RNA helicase	WBGene00011580	0.126	0.005	0.131	0.128	0.254	up		up		up
Q95QN2	ddx-23	RNA helicase	WBGene00017162	0.192	-0.084	0.107	-0.026	0.166	up				up
Q95XM9	ddx-27	RNA helicase	WBGene00022148	1.786	-0.318	1.468	-0.018	1.768	up	down	up		up
Q21736	ddx-52	RNA helicase	WBGene00011032	1.392	-0.252	1.14	-0.112	1.28	up		up		up
[truncated: 2,702 more rows]
