# Supplementary material
Source: Research Square preprint supplement (doi:10.21203/rs.3.rs-9541370/v1)
Supplement: Supplementary file 11 [file a19ecf06ce18d37aa01264ee.xlsx]

## Sheet: david_rna-down_protein-up
Category	Term	Count	%	PValue	Genes	List Total	Pop Hits	Pop Total	Fold Enrichment	Bonferroni	Benjamini	FDR
GOTERM_CC_DIRECT	GO:0005576~extracellular region	35	19.8864	7.46583e-11	WBGENE00006927, WBGENE00006928, WBGENE00019203, WBGENE00006929, WBGENE00000608, WBGENE00044605, WBGENE00006926, WBGENE00020579, WBGENE00006787, WBGENE00020339, WBGENE00022515, WBGENE00001263, WBGENE00002254, WBGENE00001385, WBGENE00003242, WBGENE00006452, WBGENE00235391, WBGENE00011330, WBGENE00012544, WBGENE00004092, WBGENE00000217, WBGENE00017374, WBGENE00012382, WBGENE00013078, WBGENE00013275,…	130	150	1836	3.29538	9.40694e-09	9.40694e-09	9.25763e-07
PFAM	PF01060:TTR-52	13	7.38636	1.10862e-06	WBGENE00017374, WBGENE00012382, WBGENE00019203, WBGENE00013078, WBGENE00013077, WBGENE00011571, WBGENE00044605, WBGENE00020339, WBGENE00020886, WBGENE00022515, WBGENE00008341, WBGENE00235391, WBGENE00017688	129	36	1971	5.51744	0.000161846	0.000162967	0.016075
GOTERM_CC_DIRECT	GO:0009986~cell surface	13	7.38636	1.18819e-05	WBGENE00017374, WBGENE00012382, WBGENE00019203, WBGENE00013078, WBGENE00013077, WBGENE00011571, WBGENE00044605, WBGENE00020339, WBGENE00020886, WBGENE00022515, WBGENE00008341, WBGENE00235391, WBGENE00017688	130	41	1836	4.47805	0.001496	0.000748557	0.0736675
PFAM	PF00094:VWD	6	3.40909	2.02407e-05	WBGENE00006927, WBGENE00006928, WBGENE00006929, WBGENE00011330, WBGENE00006926, WBGENE00006930	129	7	1971	13.0963	0.00295081	0.00148769	0.146745
GOTERM_MF_DIRECT	GO:0045735~nutrient reservoir activity	5	2.84091	0.000149551	WBGENE00006927, WBGENE00006928, WBGENE00006929, WBGENE00006926, WBGENE00006930	97	6	1645	14.1323	0.0211604	0.0106929	1.06929
GOTERM_MF_DIRECT	GO:0005319~lipid transporter activity	5	2.84091	0.000149551	WBGENE00006927, WBGENE00006928, WBGENE00006929, WBGENE00006926, WBGENE00006930	97	6	1645	14.1323	0.0211604	0.0106929	1.06929
PFAM	PF01347:Vitellogenin_N	5	2.84091	0.000230173	WBGENE00006927, WBGENE00006928, WBGENE00006929, WBGENE00006926, WBGENE00006930	129	6	1971	12.7326	0.0330507	0.00845887	0.834379
PFAM	PF09172:Vit_open_b-sht	5	2.84091	0.000230173	WBGENE00006927, WBGENE00006928, WBGENE00006929, WBGENE00006926, WBGENE00006930	129	6	1971	12.7326	0.0330507	0.00845887	0.834379
GOTERM_BP_DIRECT	GO:0031507~heterochromatin formation	6	3.40909	0.00039948	WBGENE00003485, WBGENE00002056, WBGENE00002053, WBGENE00002054, WBGENE00003224, WBGENE00001942	89	13	1607	8.33362	0.0874379	0.0557009	5.57009
GOTERM_BP_DIRECT	GO:0006869~lipid transport	6	3.40909	0.000594757	WBGENE00006927, WBGENE00006928, WBGENE00006929, WBGENE00020706, WBGENE00006926, WBGENE00006930	89	14	1607	7.73836	0.127367	0.0557009	5.57009
KEGG_PATHWAY	cel04142:Lysosome	9	5.11364	0.000642614	WBGENE00000217, WBGENE00006829, WBGENE00006452, WBGENE00012144, WBGENE00008706, WBGENE00000783, WBGENE00012225, WBGENE00004092, WBGENE00018271	38	41	717	4.14185	0.0222475	0.0224915	2.24915
GOTERM_BP_DIRECT	GO:0007097~nuclear migration	5	2.84091	0.00085725	WBGENE00003485, WBGENE00002056, WBGENE00002053, WBGENE00002054, WBGENE00013862	89	9	1607	10.0312	0.178312	0.0557009	5.57009
GOTERM_BP_DIRECT	GO:0007010~cytoskeleton organization	5	2.84091	0.00136926	WBGENE00003485, WBGENE00002056, WBGENE00002053, WBGENE00002054, WBGENE00000942	89	10	1607	9.02809	0.269317	0.0557009	5.57009
GOTERM_BP_DIRECT	GO:0090435~protein localization to nuclear envelope	4	2.27273	0.00146581	WBGENE00003485, WBGENE00002056, WBGENE00002053, WBGENE00002054	89	5	1607	14.4449	0.285318	0.0557009	5.57009
GOTERM_BP_DIRECT	GO:0051664~nuclear pore localization	4	2.27273	0.00146581	WBGENE00003485, WBGENE00002056, WBGENE00002053, WBGENE00002054	89	5	1607	14.4449	0.285318	0.0557009	5.57009
PFAM	PF00038:Filament	4	2.27273	0.00243027	WBGENE00003485, WBGENE00002056, WBGENE00002053, WBGENE00002054	129	5	1971	12.2233	0.299003	0.0714499	7.04778
GOTERM_CC_DIRECT	GO:0005652~nuclear lamina	4	2.27273	0.00305348	WBGENE00003485, WBGENE00002056, WBGENE00002053, WBGENE00002054	130	5	1836	11.2985	0.319772	0.128246	12.6211
GOTERM_BP_DIRECT	GO:0006998~nuclear envelope organization	4	2.27273	0.00473289	WBGENE00003485, WBGENE00002056, WBGENE00002053, WBGENE00002054	89	7	1607	10.3178	0.662572	0.154157	15.4157
GOTERM_MF_DIRECT	GO:0005200~structural constituent of cytoskeleton	5	2.84091	0.00518303	WBGENE00003485, WBGENE00002056, WBGENE00002053, WBGENE00002054, WBGENE00000942	97	13	1645	6.5226	0.524363	0.247058	24.7058
GOTERM_CC_DIRECT	GO:0005882~intermediate filament	4	2.27273	0.00579415	WBGENE00003485, WBGENE00002056, WBGENE00002053, WBGENE00002054	130	6	1836	9.41538	0.519143	0.182516	17.9619
GOTERM_CC_DIRECT	GO:0005912~adherens junction	4	2.27273	0.014612	WBGENE00001978, WBGENE00006406, WBGENE00001863, WBGENE00000942	130	8	1836	7.06154	0.8435	0.368223	36.2378
PFAM	PF07679:I-set	4	2.27273	0.0168288	WBGENE00003860, WBGENE00003242, WBGENE00006787, WBGENE00001863	129	9	1971	6.7907	0.916082	0.412306	40.6697
GOTERM_MF_DIRECT	GO:0005201~extracellular matrix structural constituent	3	1.70455	0.0187231	WBGENE00001263, WBGENE00006787, WBGENE00001863	97	4	1645	12.7191	0.932982	0.669352	66.9352
GOTERM_CC_DIRECT	GO:0005604~basement membrane	4	2.27273	0.0208067	WBGENE00001263, WBGENE00003242, WBGENE00006787, WBGENE00001863	130	9	1836	6.27692	0.929299	0.43694	43.0005
GOTERM_CC_DIRECT	GO:0070161~anchoring junction	4	2.27273	0.0282219	WBGENE00001978, WBGENE00010663, WBGENE00003485, WBGENE00000942	130	10	1836	5.64923	0.97287	0.495601	48.7734
GOTERM_CC_DIRECT	GO:0005581~collagen trimer	6	3.40909	0.0314667	WBGENE00000713, WBGENE00000757, WBGENE00000712, WBGENE00000703, WBGENE00001263, WBGENE00000608	130	26	1836	3.25917	0.9822	0.495601	48.7734
GOTERM_MF_DIRECT	GO:0004180~carboxypeptidase activity	3	1.70455	0.0433443	WBGENE00020082, WBGENE00012530, WBGENE00018271	97	6	1645	8.47938	0.99823	1	100
PFAM	PF13927:Ig_3	3	1.70455	0.0528229	WBGENE00006984, WBGENE00006787, WBGENE00001863	129	6	1971	7.63953	0.999638	1	99.3151
GOTERM_MF_DIRECT	GO:0042302~structural constituent of cuticle	5	2.84091	0.0535815	WBGENE00000713, WBGENE00000757, WBGENE00000712, WBGENE00000703, WBGENE00000608	97	25	1645	3.39175	0.99962	1	100
GOTERM_MF_DIRECT	GO:0005198~structural molecule activity	3	1.70455	0.0584099	WBGENE00002056, WBGENE00002054, WBGENE00006787	97	7	1645	7.26804	0.999817	1	100
GOTERM_CC_DIRECT	GO:0098793~presynapse	3	1.70455	0.0609527	WBGENE00006791, WBGENE00020298, WBGENE00020706	130	6	1836	7.06154	0.999638	0.768004	75.5814
GOTERM_CC_DIRECT	GO:0030054~cell junction	3	1.70455	0.0609527	WBGENE00002056, WBGENE00006770, WBGENE00002054	130	6	1836	7.06154	0.999638	0.768004	75.5814
PFAM	PF01484:Col_cuticle_N	5	2.84091	0.0655263	WBGENE00000713, WBGENE00000757, WBGENE00000712, WBGENE00000703, WBGENE00000608	129	24	1971	3.18314	0.99995	1	99.3151
GOTERM_BP_DIRECT	GO:0006897~endocytosis	3	1.70455	0.0669319	WBGENE00010663, WBGENE00006791, WBGENE00004092	89	8	1607	6.77107	1	1	100
GOTERM_BP_DIRECT	GO:0007155~cell adhesion	3	1.70455	0.0830601	WBGENE00001978, WBGENE00003921, WBGENE00000942	89	9	1607	6.01873	1	1	100
GOTERM_CC_DIRECT	GO:0005635~nuclear envelope	5	2.84091	0.0932297	WBGENE00003485, WBGENE00002056, WBGENE00002053, WBGENE00002054, WBGENE00013862	130	25	1836	2.82462	0.999996	1	99.2
PFAM	PF01391:Collagen	4	2.27273	0.0932962	WBGENE00000713, WBGENE00000757, WBGENE00001263, WBGENE00000608	129	17	1971	3.59508	0.999999	1	99.3151

## Sheet: david_rna-up_protein-down
Category	Term	Count	%	PValue	Genes	List Total	Pop Hits	Pop Total	Fold Enrichment	Bonferroni	Benjamini	FDR
GOTERM_CC_DIRECT	GO:1990904~ribonucleoprotein complex	37	7.4	4.85249e-10	WBGENE00016653, WBGENE00012351, WBGENE00004326, WBGENE00004424, WBGENE00004446, WBGENE00004489, WBGENE00004405, WBGENE00004426, WBGENE00006794, WBGENE00004493, WBGENE00004471, WBGENE00004498, WBGENE00004497, WBGENE00004453, WBGENE00004431, WBGENE00004452, WBGENE00004496, WBGENE00045383, WBGENE00021350, WBGENE00004490, WBGENE00016989, WBGENE00003903, WBGENE00004419, WBGENE00003902, WBGENE00007708,…	408	62	1836	2.68548	1.17915e-07	1.17915e-07	1.15004e-05
GOTERM_BP_DIRECT	GO:0006412~translation	30	6	8.02524e-07	WBGENE00021466, WBGENE00004424, WBGENE00004446, WBGENE00004489, WBGENE00004426, WBGENE00004493, WBGENE00004471, WBGENE00005663, WBGENE00004498, WBGENE00004497, WBGENE00004453, WBGENE00007000, WBGENE00004431, WBGENE00004452, WBGENE00000197, WBGENE00004496, WBGENE00021350, WBGENE00004490, WBGENE00011391, WBGENE00004414, WBGENE00004434, WBGENE00001167, WBGENE00002238, WBGENE00008920, WBGENE00185067,…	375	54	1607	2.38074	0.000493431	0.00049275	0.049275
GOTERM_MF_DIRECT	GO:0003723~RNA binding	60	12	1.75595e-05	WBGENE00000889, WBGENE00022235, WBGENE00011061, WBGENE00015022, WBGENE00017641, WBGENE00020297, WBGENE00004326, WBGENE00004920, WBGENE00000122, WBGENE00004248, WBGENE00000121, WBGENE00004444, WBGENE00004405, WBGENE00004723, WBGENE00004496, WBGENE00004915, WBGENE00003903, WBGENE00004914, WBGENE00003902, WBGENE00014165, WBGENE00003864, WBGENE00000550, WBGENE00001840, WBGENE00004434, WBGENE00004239,…	396	153	1645	1.62904	0.0077139	0.00774373	0.769106
GOTERM_CC_DIRECT	GO:0005730~nucleolus	23	4.6	2.3076e-05	WBGENE00019168, WBGENE00017210, WBGENE00022378, WBGENE00020389, WBGENE00014165, WBGENE00007708, WBGENE00013144, WBGENE00012351, WBGENE00012692, WBGENE00010709, WBGENE00015232, WBGENE00020297, WBGENE00000276, WBGENE00016073, WBGENE00003821, WBGENE00003063, WBGENE00011966, WBGENE00009711, WBGENE00003596, WBGENE00010044, WBGENE00021074, WBGENE00011311, WBGENE00015811	408	43	1836	2.40698	0.00559184	0.00186915	0.1823
GOTERM_CC_DIRECT	GO:0005840~ribosome	23	4.6	2.3076e-05	WBGENE00004419, WBGENE00011391, WBGENE00004414, WBGENE00004424, WBGENE00004446, WBGENE00004434, WBGENE00004489, WBGENE00004426, WBGENE00004471, WBGENE00004493, WBGENE00185067, WBGENE00004498, WBGENE00004443, WBGENE00004431, WBGENE00004497, WBGENE00004453, WBGENE00004496, WBGENE00004452, WBGENE00021350, WBGENE00012179, WBGENE00018602, WBGENE00004490, WBGENE00016989	408	43	1836	2.40698	0.00559184	0.00186915	0.1823
GOTERM_CC_DIRECT	GO:0022625~cytosolic large ribosomal subunit	12	2.4	3.21717e-05	WBGENE00004419, WBGENE00004443, WBGENE00004453, WBGENE00004431, WBGENE00004452, WBGENE00004414, WBGENE00004424, WBGENE00021350, WBGENE00004446, WBGENE00012179, WBGENE00004444, WBGENE00004426	408	15	1836	3.6	0.00778736	0.00195443	0.190617
GOTERM_MF_DIRECT	GO:0003735~structural constituent of ribosome	21	4.2	3.87244e-05	WBGENE00011391, WBGENE00004414, WBGENE00004424, WBGENE00004446, WBGENE00004434, WBGENE00004489, WBGENE00004444, WBGENE00004426, WBGENE00004471, WBGENE00004493, WBGENE00185067, WBGENE00004498, WBGENE00004443, WBGENE00004431, WBGENE00004497, WBGENE00004453, WBGENE00004496, WBGENE00004452, WBGENE00021350, WBGENE00012179, WBGENE00004490	396	36	1645	2.42319	0.0169328	0.00853872	0.848064
KEGG_PATHWAY	cel03010:Ribosome	22	4.4	5.15105e-05	WBGENE00004419, WBGENE00011391, WBGENE00004414, WBGENE00004424, WBGENE00004446, WBGENE00004434, WBGENE00004489, WBGENE00004444, WBGENE00004426, WBGENE00004471, WBGENE00004493, WBGENE00185067, WBGENE00004498, WBGENE00004443, WBGENE00004431, WBGENE00004497, WBGENE00004453, WBGENE00004496, WBGENE00004452, WBGENE00021350, WBGENE00012179, WBGENE00004490	210	34	717	2.20924	0.00503544	0.00504803	0.504803
GOTERM_MF_DIRECT	GO:0003676~nucleic acid binding	41	8.2	8.12539e-05	WBGENE00015680, WBGENE00043057, WBGENE00000889, WBGENE00022378, WBGENE00022235, WBGENE00011061, WBGENE00016653, WBGENE00013144, WBGENE00017641, WBGENE00000122, WBGENE00000121, WBGENE00022737, WBGENE00016073, WBGENE00004702, WBGENE00004723, WBGENE00000787, WBGENE00004701, WBGENE00006698, WBGENE00000197, WBGENE00045383, WBGENE00017778, WBGENE00013214, WBGENE00017816, WBGENE00017210, WBGENE00003903,…	396	97	1645	1.75583	0.0352	0.0119443	1.18631
GOTERM_CC_DIRECT	GO:0005743~mitochondrial inner membrane	21	4.2	0.000200012	WBGENE00000229, WBGENE00019007, WBGENE00017982, WBGENE00020275, WBGENE00006439, WBGENE00021849, WBGENE00009739, WBGENE00004015, WBGENE00021925, WBGENE00002025, WBGENE00000941, WBGENE00000787, WBGENE00011119, WBGENE00011527, WBGENE00010015, WBGENE00008410, WBGENE00015755, WBGENE00010419, WBGENE00020140, WBGENE00022281, WBGENE00195063	408	42	1836	2.25	0.0474454	0.00972059	0.948058
GOTERM_BP_DIRECT	GO:0006457~protein folding	19	3.8	0.000231307	WBGENE00000889, WBGENE00000877, WBGENE00021248, WBGENE00000802, WBGENE00011480, WBGENE00003963, WBGENE00000377, WBGENE00002025, WBGENE00000378, WBGENE00002007, WBGENE00003964, WBGENE00006889, WBGENE00007443, WBGENE00000380, WBGENE00000381, WBGENE00009004, WBGENE00020391, WBGENE00011771, WBGENE00015752	375	35	1607	2.32632	0.132613	0.0710111	7.10111
GOTERM_CC_DIRECT	GO:0005634~nucleus	143	28.6	0.000458694	WBGENE00004807, WBGENE00003836, WBGENE00011061, WBGENE00012393, WBGENE00012030, WBGENE00006708, WBGENE00004809, WBGENE00020297, WBGENE00004808, WBGENE00004920, WBGENE00004887, WBGENE00003951, WBGENE00004248, WBGENE00002225, WBGENE00008729, WBGENE00001898, WBGENE00016192, WBGENE00007400, WBGENE00004132, WBGENE00023450, WBGENE00015811, WBGENE00004915, WBGENE00020588, WBGENE00003826, WBGENE00004914,…	408	517	1836	1.24468	0.105498	0.0185771	1.81184
GOTERM_MF_DIRECT	GO:0005524~ATP binding	57	11.4	0.000538982	WBGENE00022037, WBGENE00000408, WBGENE00015540, WBGENE00002225, WBGENE00000520, WBGENE00002025, WBGENE00009812, WBGENE00016073, WBGENE00006702, WBGENE00008412, WBGENE00005663, WBGENE00011771, WBGENE00015538, WBGENE00022281, WBGENE00019730, WBGENE00001606, WBGENE00001840, WBGENE00138717, WBGENE00019492, WBGENE00006461, WBGENE00008564, WBGENE00015688, WBGENE00020391, WBGENE00000229, WBGENE00021248,…	396	159	1645	1.48918	0.211604	0.0594228	5.90186
GOTERM_MF_DIRECT	GO:0140662~ATP-dependent protein folding chaperone	10	2	0.000683542	WBGENE00000380, WBGENE00011480, WBGENE00000381, WBGENE00020391, WBGENE00002005, WBGENE00011771, WBGENE00000377, WBGENE00002025, WBGENE00000378, WBGENE00002007	396	13	1645	3.19542	0.260326	0.0602884	5.98783
GOTERM_CC_DIRECT	GO:0043186~P granule	20	4	0.000937456	WBGENE00003915, WBGENE00022378, WBGENE00011061, WBGENE00004914, WBGENE00003902, WBGENE00017641, WBGENE00012484, WBGENE00022034, WBGENE00015232, WBGENE00003864, WBGENE00004920, WBGENE00001597, WBGENE00010260, WBGENE00003865, WBGENE00004241, WBGENE00002083, WBGENE00003231, WBGENE00003230, WBGENE00004132, WBGENE00013214	408	43	1836	2.09302	0.203803	0.0325431	3.17396
GOTERM_CC_DIRECT	GO:0005788~endoplasmic reticulum lumen	9	1.8	0.00115847	WBGENE00000802, WBGENE00011480, WBGENE00001077, WBGENE00022297, WBGENE00003963, WBGENE00011771, WBGENE00015752, WBGENE00002007, WBGENE00003964	408	12	1836	3.375	0.245478	0.0351885	3.43197
GOTERM_BP_DIRECT	GO:0010629~negative regulation of gene expression	12	2.4	0.00200953	WBGENE00004807, WBGENE00000229, WBGENE00011636, WBGENE00004808, WBGENE00003864, WBGENE00004502, WBGENE00003587, WBGENE00001167, WBGENE00001898, WBGENE00003920, WBGENE00002238, WBGENE00003865	375	20	1607	2.5712	0.709776	0.411283	41.1283
PFAM	PF00118:Cpn60_TCP1	6	1.2	0.00236054	WBGENE00000380, WBGENE00000381, WBGENE00020391, WBGENE00000377, WBGENE00002025, WBGENE00000378	430	6	1971	4.58372	0.67533	1	100
GOTERM_CC_DIRECT	GO:0005739~mitochondrion	57	11.4	0.00246279	WBGENE00000209, WBGENE00009739, WBGENE00020417, WBGENE00002025, WBGENE00001975, WBGENE00009812, WBGENE00003162, WBGENE00007000, WBGENE00015413, WBGENE00016943, WBGENE00020140, WBGENE00022281, WBGENE00019978, WBGENE00000877, WBGENE00001564, WBGENE00000830, WBGENE00000831, WBGENE00007630, WBGENE00002183, WBGENE00009973, WBGENE00011527, WBGENE00010794, WBGENE00000040, WBGENE00012970, WBGENE00000229,…	408	181	1836	1.41713	0.450747	0.0664953	6.48534
GOTERM_CC_DIRECT	GO:0005783~endoplasmic reticulum	30	6	0.00361518	WBGENE00022037, WBGENE00015162, WBGENE00000802, WBGENE00013263, WBGENE00011480, WBGENE00021420, WBGENE00019760, WBGENE00044784, WBGENE00001331, WBGENE00018152, WBGENE00001478, WBGENE00001479, WBGENE00002007, WBGENE00001480, WBGENE00004497, WBGENE00007363, WBGENE00015752, WBGENE00004490, WBGENE00013238, WBGENE00022044, WBGENE00022122, WBGENE00012484, WBGENE00003963, WBGENE00003964, WBGENE00001303,…	408	82	1836	1.64634	0.585251	0.0878489	8.56798
GOTERM_MF_DIRECT	GO:0003729~mRNA binding	22	4.4	0.00439952	WBGENE00003902, WBGENE00014165, WBGENE00016653, WBGENE00012484, WBGENE00003864, WBGENE00000122, WBGENE00000121, WBGENE00000550, WBGENE00001840, WBGENE00010260, WBGENE00022737, WBGENE00004702, WBGENE00003865, WBGENE00002000, WBGENE00004387, WBGENE00003231, WBGENE00003230, WBGENE00004132, WBGENE00045383, WBGENE00013214, WBGENE00017816, WBGENE00013347	396	51	1645	1.79194	0.856937	0.323365	32.1165
GOTERM_BP_DIRECT	GO:0007005~mitochondrion organization	9	1.8	0.00629795	WBGENE00007630, WBGENE00010015, WBGENE00008410, WBGENE00006439, WBGENE00000550, WBGENE00004015, WBGENE00002025, WBGENE00019900, WBGENE00000941	375	14	1607	2.75486	0.979462	0.966735	96.6735
GOTERM_CC_DIRECT	GO:0022627~cytosolic small ribosomal subunit	6	1.2	0.0073714	WBGENE00004471, WBGENE00004498, WBGENE00004497, WBGENE00004496, WBGENE00004489, WBGENE00004490	408	7	1836	3.85714	0.834351	0.162841	15.882
GOTERM_CC_DIRECT	GO:0005832~chaperonin-containing T-complex	5	1	0.00983542	WBGENE00000380, WBGENE00000381, WBGENE00020391, WBGENE00000377, WBGENE00000378	408	5	1836	4.5	0.909449	0.199167	19.4249
GOTERM_BP_DIRECT	GO:0000470~maturation of LSU-rRNA	5	1	0.0118132	WBGENE00009711, WBGENE00004419, WBGENE00012393, WBGENE00012351, WBGENE00015811	375	5	1607	4.28533	0.99933	1	100
PFAM	PF00076:RRM_1	16	3.2	0.012563	WBGENE00000889, WBGENE00003903, WBGENE00000935, WBGENE00022235, WBGENE00003902, WBGENE00016653, WBGENE00004698, WBGENE00004702, WBGENE00004723, WBGENE00004701, WBGENE00006698, WBGENE00002000, WBGENE00004387, WBGENE00017778, WBGENE00045383, WBGENE00011722	430	39	1971	1.8805	0.997565	1	100
GOTERM_MF_DIRECT	GO:0051082~unfolded protein binding	11	2.2	0.0217596	WBGENE00007443, WBGENE00021248, WBGENE00000380, WBGENE00000802, WBGENE00002011, WBGENE00011480, WBGENE00000381, WBGENE00009004, WBGENE00020391, WBGENE00000377, WBGENE00000378	396	22	1645	2.07702	0.999939	1	99.5455
GOTERM_MF_DIRECT	GO:0003730~mRNA 3'-UTR binding	11	2.2	0.0217596	WBGENE00004241, WBGENE00022235, WBGENE00003903, WBGENE00000935, WBGENE00022257, WBGENE00003902, WBGENE00003231, WBGENE00003230, WBGENE00003864, WBGENE00004239, WBGENE00003865	396	22	1645	2.07702	0.999939	1	99.5455
GOTERM_MF_DIRECT	GO:0005525~GTP binding	17	3.4	0.0218693	WBGENE00021466, WBGENE00021078, WBGENE00020297, WBGENE00006528, WBGENE00004302, WBGENE00001167, WBGENE00006536, WBGENE00003821, WBGENE00006537, WBGENE00010038, WBGENE00016907, WBGENE00004273, WBGENE00004311, WBGENE00003596, WBGENE00007000, WBGENE00004266, WBGENE00016844	396	41	1645	1.72241	0.999942	1	99.5455
GOTERM_CC_DIRECT	GO:0030687~preribosome, large subunit precursor	5	1	0.0243576	WBGENE00019168, WBGENE00003063, WBGENE00009711, WBGENE00012351, WBGENE00015811	408	6	1836	3.75	0.997502	0.426942	41.64
GOTERM_CC_DIRECT	GO:0005737~cytoplasm	143	28.6	0.0245975	WBGENE00018376, WBGENE00020696, WBGENE00043057, WBGENE00004807, WBGENE00003836, WBGENE00011061, WBGENE00012030, WBGENE00017565, WBGENE00004809, WBGENE00004808, WBGENE00004920, WBGENE00003951, WBGENE00002225, WBGENE00002068, WBGENE00010370, WBGENE00001898, WBGENE00009812, WBGENE00004405, WBGENE00006794, WBGENE00003162, WBGENE00004497, WBGENE00004132, WBGENE00004490, WBGENE00021676, WBGENE00004915,…	408	565	1836	1.13894	0.997647	0.426942	41.64
GOTERM_CC_DIRECT	GO:0005777~peroxisome	9	1.8	0.0288494	WBGENE00000081, WBGENE00007143, WBGENE00008564, WBGENE00017123, WBGENE00000991, WBGENE00007130, WBGENE00008669, WBGENE00000830, WBGENE00000831	408	18	1836	2.25	0.999186	0.46736	45.582
GOTERM_MF_DIRECT	GO:0016887~ATP hydrolysis activity	23	4.6	0.0310805	WBGENE00000229, WBGENE00022378, WBGENE00011480, WBGENE00012097, WBGENE00015232, WBGENE00004502, WBGENE00002005, WBGENE00002225, WBGENE00001840, WBGENE00000377, WBGENE00000520, WBGENE00004505, WBGENE00000378, WBGENE00002007, WBGENE00008412, WBGENE00007784, WBGENE00000380, WBGENE00010015, WBGENE00002083, WBGENE00000381, WBGENE00015688, WBGENE00020391, WBGENE00022281	396	63	1645	1.51655	0.999999	1	99.5455
GOTERM_MF_DIRECT	GO:0016874~ligase activity	9	1.8	0.0313837	WBGENE00019730, WBGENE00001606, WBGENE00022037, WBGENE00006708, WBGENE00016844, WBGENE00008669, WBGENE00018152, WBGENE00009812, WBGENE00019492	396	17	1645	2.1992	0.999999	1	99.5455
KEGG_PATHWAY	cel00630:Glyoxylate and dicarboxylate metabolism	10	2	0.0319976	WBGENE00002183, WBGENE00003162, WBGENE00001606, WBGENE00010794, WBGENE00000040, WBGENE00001564, WBGENE00003214, WBGENE00017765, WBGENE00000830, WBGENE00000831	210	17	717	2.0084	0.958706	0.865438	86.5438
GOTERM_BP_DIRECT	GO:0006364~rRNA processing	11	2.2	0.0338357	WBGENE00019168, WBGENE00010435, WBGENE00003063, WBGENE00022378, WBGENE00009711, WBGENE00012393, WBGENE00007708, WBGENE00012351, WBGENE00012692, WBGENE00010709, WBGENE00000276	375	24	1607	1.96411	1	1	100
PFAM	PF00487:FA_desaturase	4	0.8	0.0343601	WBGENE00001395, WBGENE00001396, WBGENE00001393, WBGENE00001394	430	4	1971	4.58372	1	1	100
GOTERM_CC_DIRECT	GO:0005759~mitochondrial matrix	10	2	0.0367623	WBGENE00008412, WBGENE00021248, WBGENE00003162, WBGENE00010794, WBGENE00015413, WBGENE00017734, WBGENE00001155, WBGENE00002025, WBGENE00011510, WBGENE00019978	408	22	1836	2.04545	0.999889	0.558328	54.4542
GOTERM_MF_DIRECT	GO:0003924~GTPase activity	13	2.6	0.036802	WBGENE00021466, WBGENE00020297, WBGENE00004302, WBGENE00001167, WBGENE00006536, WBGENE00003821, WBGENE00006537, WBGENE00010038, WBGENE00016907, WBGENE00004273, WBGENE00004311, WBGENE00007000, WBGENE00004266	396	30	1645	1.80008	1	1	99.5455
PFAM	PF00106:adh_short	8	1.6	0.0402781	WBGENE00016274, WBGENE00000966, WBGENE00008986, WBGENE00007363, WBGENE00000991, WBGENE00000981, WBGENE00000973, WBGENE00019153	430	16	1971	2.29186	1	1	100
GOTERM_BP_DIRECT	GO:0000460~maturation of 5.8S rRNA	4	0.8	0.0414194	WBGENE00009711, WBGENE00012393, WBGENE00012351, WBGENE00015811	375	4	1607	4.28533	1	1	100
KEGG_PATHWAY	cel03040:Spliceosome	21	4.2	0.0474745	WBGENE00000889, WBGENE00004915, WBGENE00020423, WBGENE00004914, WBGENE00000122, WBGENE00004920, WBGENE00000121, WBGENE00002005, WBGENE00001840, WBGENE00004016, WBGENE00010260, WBGENE00004698, WBGENE00004723, WBGENE00004701, WBGENE00007400, WBGENE00006698, WBGENE00008683, WBGENE00003123, WBGENE00004387, WBGENE00008586, WBGENE00017816	210	49	717	1.46327	0.99149	0.865438	86.5438
KEGG_PATHWAY	cel00380:Tryptophan metabolism	8	1.6	0.0523983	WBGENE00002183, WBGENE00010794, WBGENE00001155, WBGENE00014206, WBGENE00000830, WBGENE00019978, WBGENE00000116, WBGENE00000831	210	13	717	2.1011	0.994879	0.865438	86.5438
GOTERM_BP_DIRECT	GO:0008380~RNA splicing	16	3.2	0.0545114	WBGENE00004915, WBGENE00020423, WBGENE00004914, WBGENE00012484, WBGENE00004887, WBGENE00004920, WBGENE00001840, WBGENE00004698, WBGENE00004702, WBGENE00004723, WBGENE00004701, WBGENE00007400, WBGENE00008683, WBGENE00003123, WBGENE00004387, WBGENE00008586	375	43	1607	1.59454	1	1	100
GOTERM_BP_DIRECT	GO:0043050~nematode pharyngeal pumping	5	1	0.0553133	WBGENE00000812, WBGENE00000229, WBGENE00006586, WBGENE00001395, WBGENE00004887	375	7	1607	3.06095	1	1	100
GOTERM_BP_DIRECT	GO:0002181~cytoplasmic translation	5	1	0.0553133	WBGENE00005663, WBGENE00004498, WBGENE00004443, WBGENE00004497, WBGENE00004434	375	7	1607	3.06095	1	1	100
GOTERM_BP_DIRECT	GO:0006636~unsaturated fatty acid biosynthetic process	5	1	0.0553133	WBGENE00001395, WBGENE00001396, WBGENE00001393, WBGENE00001394, WBGENE00001397	375	7	1607	3.06095	1	1	100
GOTERM_BP_DIRECT	GO:0006633~fatty acid biosynthetic process	8	1.6	0.055868	WBGENE00010794, WBGENE00001395, WBGENE00001396, WBGENE00009342, WBGENE00001393, WBGENE00001394, WBGENE00012970, WBGENE00001397	375	16	1607	2.14267	1	1	100
GOTERM_MF_DIRECT	GO:0016491~oxidoreductase activity	33	6.6	0.0561665	WBGENE00000966, WBGENE00016274, WBGENE00014053, WBGENE00017565, WBGENE00022297, WBGENE00001397, WBGENE00003162, WBGENE00007363, WBGENE00009342, WBGENE00015413, WBGENE00016943, WBGENE00017536, WBGENE00019636, WBGENE00011510, WBGENE00004391, WBGENE00012149, WBGENE00019978, WBGENE00000991, WBGENE00019153, WBGENE00000973, WBGENE00000116, WBGENE00009973, WBGENE00008986, WBGENE00009453, WBGENE00010794,…	396	103	1645	1.33091	1	1	99.5455
GOTERM_BP_DIRECT	GO:0006099~tricarboxylic acid cycle	6	1.2	0.0589819	WBGENE00003162, WBGENE00000040, WBGENE00001564, WBGENE00016844, WBGENE00009440, WBGENE00009812	375	10	1607	2.5712	1	1	100
PFAM	PF00270:DEAD	7	1.4	0.0625846	WBGENE00022378, WBGENE00002083, WBGENE00015232, WBGENE00001840, WBGENE00013214, WBGENE00010260, WBGENE00016073	430	14	1971	2.29186	1	1	100
KEGG_PATHWAY	cel03060:Protein export	5	1	0.063116	WBGENE00019893, WBGENE00013984, WBGENE00021925, WBGENE00002007, WBGENE00001303	210	6	717	2.84524	0.99832	0.865438	86.5438
KEGG_PATHWAY	cel01210:2-Oxocarboxylic acid metabolism	7	1.4	0.0674584	WBGENE00010794, WBGENE00000040, WBGENE00015413, WBGENE00007507, WBGENE00007508, WBGENE00009440, WBGENE00011510	210	11	717	2.17273	0.998935	0.865438	86.5438
KEGG_PATHWAY	cel01200:Carbon metabolism	19	3.8	0.0714158	WBGENE00017301, WBGENE00001564, WBGENE00003214, WBGENE00001155, WBGENE00000830, WBGENE00009812, WBGENE00008506, WBGENE00000831, WBGENE00002183, WBGENE00003162, WBGENE00010794, WBGENE00000040, WBGENE00008564, WBGENE00015413, WBGENE00016844, WBGENE00009440, WBGENE00008780, WBGENE00017765, WBGENE00011510	210	45	717	1.44159	0.999298	0.865438	86.5438
GOTERM_BP_DIRECT	GO:0000398~mRNA splicing, via spliceosome	15	3	0.0731906	WBGENE00022235, WBGENE00004915, WBGENE00020423, WBGENE00004920, WBGENE00006726, WBGENE00001840, WBGENE00004016, WBGENE00004698, WBGENE00022737, WBGENE00004702, WBGENE00004723, WBGENE00004701, WBGENE00007400, WBGENE00006698, WBGENE00013347	375	41	1607	1.5678	1	1	100
GOTERM_CC_DIRECT	GO:0005686~U2 snRNP	6	1.2	0.0737208	WBGENE00004915, WBGENE00004914, WBGENE00008683, WBGENE00004920, WBGENE00004016, WBGENE00004723	408	11	1836	2.45455	1	0.995231	97.0657
GOTERM_CC_DIRECT	GO:0000502~proteasome complex	6	1.2	0.0737208	WBGENE00015688, WBGENE00004502, WBGENE00003951, WBGENE00003923, WBGENE00003922, WBGENE00004505	408	11	1836	2.45455	1	0.995231	97.0657
GOTERM_BP_DIRECT	GO:0006397~mRNA processing	18	3.6	0.0747028	WBGENE00004915, WBGENE00020423, WBGENE00004914, WBGENE00012484, WBGENE00004887, WBGENE00004920, WBGENE00001597, WBGENE00001840, WBGENE00004698, WBGENE00022737, WBGENE00004702, WBGENE00004723, WBGENE00004701, WBGENE00007400, WBGENE00008683, WBGENE00003123, WBGENE00004387, WBGENE00017988	375	52	1607	1.48338	1	1	100
KEGG_PATHWAY	cel00430:Taurine and hypotaurine metabolism	4	0.8	0.0768429	WBGENE00001480, WBGENE00018986, WBGENE00001478, WBGENE00001479	210	4	717	3.41429	0.999605	0.865438	86.5438
KEGG_PATHWAY	cel00020:Citrate cycle (TCA cycle)	8	1.6	0.079479	WBGENE00003162, WBGENE00010794, WBGENE00000040, WBGENE00015413, WBGENE00016844, WBGENE00009440, WBGENE00011510, WBGENE00009812	210	14	717	1.95102	0.999701	0.865438	86.5438
GOTERM_BP_DIRECT	GO:0006417~regulation of translation	7	1.4	0.0827929	WBGENE00004241, WBGENE00000935, WBGENE00014165, WBGENE00004132, WBGENE00003864, WBGENE00001597, WBGENE00003865	375	14	1607	2.14267	1	1	100
GOTERM_BP_DIRECT	GO:0036498~IRE1-mediated unfolded protein response	12	2.4	0.0833479	WBGENE00000802, WBGENE00019760, WBGENE00006708, WBGENE00001077, WBGENE00013740, WBGENE00003963, WBGENE00005648, WBGENE00011771, WBGENE00015752, WBGENE00001331, WBGENE00012766, WBGENE00002007	375	31	1607	1.65884	1	1	100
GOTERM_BP_DIRECT	GO:0040019~positive regulation of embryonic development	4	0.8	0.0858288	WBGENE00004241, WBGENE00003864, WBGENE00003964, WBGENE00003865	375	5	1607	3.42827	1	1	100
PFAM	PF00271:Helicase_C	7	1.4	0.0858362	WBGENE00022378, WBGENE00002083, WBGENE00015232, WBGENE00001840, WBGENE00013214, WBGENE00010260, WBGENE00016073	430	15	1971	2.13907	1	1	100
GOTERM_BP_DIRECT	GO:0006730~one-carbon metabolic process	6	1.2	0.0880976	WBGENE00019322, WBGENE00013805, WBGENE00015540, WBGENE00003214, WBGENE00015538, WBGENE00019492	375	11	1607	2.33745	1	1	100
GOTERM_MF_DIRECT	GO:0003824~catalytic activity	17	3.4	0.0894771	WBGENE00001606, WBGENE00017671, WBGENE00019298, WBGENE00017241, WBGENE00001564, WBGENE00001155, WBGENE00009812, WBGENE00003844, WBGENE00008506, WBGENE00006603, WBGENE00000081, WBGENE00003162, WBGENE00007143, WBGENE00018758, WBGENE00015413, WBGENE00016844, WBGENE00014206	396	48	1645	1.47122	1	1	99.5455
GOTERM_CC_DIRECT	GO:0071013~catalytic step 2 spliceosome	9	1.8	0.0922115	WBGENE00000889, WBGENE00000877, WBGENE00022235, WBGENE00004915, WBGENE00004914, WBGENE00008683, WBGENE00003123, WBGENE00008586, WBGENE00004920	408	22	1836	1.84091	1	1	97.9339
GOTERM_CC_DIRECT	GO:0005829~cytosol	39	7.8	0.0956278	WBGENE00019322, WBGENE00016653, WBGENE00015781, WBGENE00015540, WBGENE00004920, WBGENE00002005, WBGENE00006726, WBGENE00003951, WBGENE00010370, WBGENE00020658, WBGENE00016907, WBGENE00005663, WBGENE00004497, WBGENE00023450, WBGENE00009165, WBGENE00015538, WBGENE00004490, WBGENE00019730, WBGENE00004915, WBGENE00003903, WBGENE00002879, WBGENE00004914, WBGENE00003902, WBGENE00003907, WBGENE00015551,…	408	141	1836	1.24468	1	1	97.9339
