# Supplementary material
Source: Research Square preprint supplement (doi:10.21203/rs.3.rs-9541370/v1)
Supplement: Supplementary file 12 [file ffca0a24cffee7e68a3b1941.xlsx]

## Sheet: david_Q2
Category	Term	Count	%	PValue	Genes	List Total	Pop Hits	Pop Total	Fold Enrichment	Bonferroni	Benjamini	FDR	negative log 10 p value
GOTERM_CC_DIRECT	GO:0005634~nucleus	177	30.4124	1.00167e-13	WBGENE00018893, WBGENE00003836, WBGENE00021785, WBGENE00012030, WBGENE00016750, WBGENE00021660, WBGENE00020297, WBGENE00022232, WBGENE00004248, WBGENE00016194, WBGENE00004888, WBGENE00021789, WBGENE00008455, WBGENE00008458, WBGENE00016508, WBGENE00002077, WBGENE00019219, WBGENE00013236, WBGENE00015811, WBGENE00022765, WBGENE00021830, WBGENE00004914, WBGENE00021276, WBGENE00017830, WBGENE00016740,…	504	837	3860	1.61959	2.00284e-11	4.00669e-12	3.60602e-10	12.9993
GOTERM_CC_DIRECT	GO:0005730~nucleolus	102	17.5258	8.30314e-61	WBGENE00018893, WBGENE00018891, WBGENE00021026, WBGENE00018890, WBGENE00021785, WBGENE00021660, WBGENE00020297, WBGENE00022232, WBGENE00016073, WBGENE00021789, WBGENE00008455, WBGENE00016508, WBGENE00017435, WBGENE00015811, WBGENE00022765, WBGENE00021830, WBGENE00021276, WBGENE00016740, WBGENE00014165, WBGENE00000276, WBGENE00021715, WBGENE00002850, WBGENE00004477, WBGENE00020902, WBGENE00007623,…	504	141	3860	5.54036	1.66063e-58	1.66063e-58	1.49457e-56	60.0808
GOTERM_MF_DIRECT	GO:0003723~RNA binding	96	16.4948	2.49029e-21	WBGENE00020498, WBGENE00015461, WBGENE00022235, WBGENE00018890, WBGENE00019264, WBGENE00021785, WBGENE00020097, WBGENE00022792, WBGENE00045433, WBGENE00020297, WBGENE00022232, WBGENE00001498, WBGENE00004248, WBGENE00021828, WBGENE00021789, WBGENE00008456, WBGENE00007201, WBGENE00008455, WBGENE00012904, WBGENE00010089, WBGENE00004496, WBGENE00012342, WBGENE00021073, WBGENE00011730, WBGENE00017319,…	462	283	3564	2.61686	9.96117e-19	9.96117e-19	9.61253e-17
GOTERM_CC_DIRECT	GO:0005739~mitochondrion	83	14.2612	0.0359195	WBGENE00044344, WBGENE00021421, WBGENE00019941, WBGENE00022159, WBGENE00015025, WBGENE00014098, WBGENE00023487, WBGENE00003831, WBGENE00044305, WBGENE00007712, WBGENE00008456, WBGENE00010089, WBGENE00020382, WBGENE00022281, WBGENE00017759, WBGENE00017319, WBGENE00010766, WBGENE00018046, WBGENE00000877, WBGENE00020189, WBGENE00015133, WBGENE00006617, WBGENE00006937, WBGENE00000830, WBGENE00018361,…	504	525	3860	1.21081	0.999335	0.266071	23.9464	1.44467
GOTERM_BP_DIRECT	GO:0006364~rRNA processing	58	9.96564	4.23374e-40	WBGENE00018893, WBGENE00015461, WBGENE00021785, WBGENE00012351, WBGENE00045433, WBGENE00022232, WBGENE00021789, WBGENE00007201, WBGENE00008455, WBGENE00008458, WBGENE00019219, WBGENE00012465, WBGENE00021073, WBGENE00021830, WBGENE00014083, WBGENE00020189, WBGENE00013151, WBGENE00016740, WBGENE00021276, WBGENE00022046, WBGENE00021277, WBGENE00018762, WBGENE00000276, WBGENE00001001, WBGENE00002850,…	453	70	3542	6.47859	2.29469e-37	2.29045e-37	2.18884e-35	39.3733
GOTERM_CC_DIRECT	GO:1990904~ribonucleoprotein complex	69	11.8557	3.27937e-20	WBGENE00015461, WBGENE00004409, WBGENE00015025, WBGENE00023487, WBGENE00012351, WBGENE00004447, WBGENE00004445, WBGENE00004489, WBGENE00007712, WBGENE00004492, WBGENE00004498, WBGENE00004410, WBGENE00004497, WBGENE00004496, WBGENE00017997, WBGENE00017319, WBGENE00016740, WBGENE00022046, WBGENE00015133, WBGENE00001167, WBGENE00004477, WBGENE00008514, WBGENE00010478, WBGENE00004487, WBGENE00004442,…	504	167	3860	3.16439	6.55874e-18	2.18625e-18	1.96762e-16	19.4842
GOTERM_MF_DIRECT	GO:0005524~ATP binding	68	11.6838	0.0479947	WBGENE00017087, WBGENE00018890, WBGENE00006707, WBGENE00022792, WBGENE00006945, WBGENE00001498, WBGENE00001497, WBGENE00008405, WBGENE00001337, WBGENE00016194, WBGENE00016073, WBGENE00003119, WBGENE00008458, WBGENE00005663, WBGENE00010562, WBGENE00002152, WBGENE00012342, WBGENE00019219, WBGENE00012344, WBGENE00015538, WBGENE00012984, WBGENE00022281, WBGENE00013677, WBGENE00000915, WBGENE00021277,…	462	429	3564	1.22278	1	0.695487	67.1145
GOTERM_BP_DIRECT	GO:0042254~ribosome biogenesis	42	7.21649	7.07475e-30	WBGENE00018893, WBGENE00019168, WBGENE00015461, WBGENE00018891, WBGENE00022852, WBGENE00012692, WBGENE00012351, WBGENE00045433, WBGENE00020297, WBGENE00021660, WBGENE00001234, WBGENE00007617, WBGENE00022739, WBGENE00003119, WBGENE00006497, WBGENE00003063, WBGENE00008458, WBGENE00016607, WBGENE00022021, WBGENE00013236, WBGENE00010627, WBGENE00021073, WBGENE00012964, WBGENE00019678, WBGENE00016740,…	453	49	3542	6.70199	3.83451e-27	1.91372e-27	1.82882e-25	29.1503
GOTERM_MF_DIRECT	GO:0003735~structural constituent of ribosome	52	8.93471	3.48868e-14	WBGENE00004409, WBGENE00015025, WBGENE00023487, WBGENE00004447, WBGENE00004445, WBGENE00004489, WBGENE00007712, WBGENE00007564, WBGENE00004492, WBGENE00004498, WBGENE00004410, WBGENE00004497, WBGENE00004496, WBGENE00017319, WBGENE00015133, WBGENE00004479, WBGENE00004477, WBGENE00004487, WBGENE00004442, WBGENE00004484, WBGENE00012179, WBGENE00012697, WBGENE00011247, WBGENE00044321, WBGENE00015487,…	462	133	3564	3.01611	1.39444e-11	6.97736e-12	6.73315e-10
keGG_PATHWAY	mitochondrial ribosome	50	8.58
GOTERM_MF_DIRECT	GO:0003676~nucleic acid binding	44	7.56014	5.6476e-06	WBGENE00043057, WBGENE00003815, WBGENE00022235, WBGENE00018890, WBGENE00016653, WBGENE00013144, WBGENE00022792, WBGENE00011043, WBGENE00012908, WBGENE00001598, WBGENE00019241, WBGENE00016194, WBGENE00016073, WBGENE00012904, WBGENE00000197, WBGENE00012342, WBGENE00019219, WBGENE00012465, WBGENE00007581, WBGENE00011730, WBGENE00017210, WBGENE00022148, WBGENE00021277, WBGENE00021351, WBGENE00019510,…	462	170	3564	1.99664	0.0022565	0.000251005	0.0242219
GOTERM_BP_DIRECT	GO:0006412~translation	80	13.7457	3.23555e-24	WBGENE00004409, WBGENE00021466, WBGENE00015025, WBGENE00019543, WBGENE00006945, WBGENE00001498, WBGENE00004447, WBGENE00004445, WBGENE00004489, WBGENE00001497, WBGENE00001337, WBGENE00004492, WBGENE00005663, WBGENE00004498, WBGENE00004497, WBGENE00002152, WBGENE00004496, WBGENE00010560, WBGENE00018846, WBGENE00013677, WBGENE00017319, WBGENE00001209, WBGENE00020269, WBGENE00014123, WBGENE00021351,…	453	194	3542	3.22432	1.75367e-21	5.83477e-22	5.57593e-20	23.4901
KEGG_PATHWAY	cel03008:Ribosome biogenesis in eukaryotes	41	7.04467	1.91609e-28	WBGENE00018891, WBGENE00022852, WBGENE00019264, WBGENE00003836, WBGENE00012030, WBGENE00015486, WBGENE00020297, WBGENE00011043, WBGENE00013143, WBGENE00001234, WBGENE00020915, WBGENE00022739, WBGENE00003119, WBGENE00021843, WBGENE00021789, WBGENE00016907, WBGENE00008458, WBGENE00022021, WBGENE00017855, WBGENE00018866, WBGENE00017435, WBGENE00010627, WBGENE00012964, WBGENE00012887, WBGENE00014083,…	208	53	1794	6.67217	1.68616e-26	1.68616e-26	1.68616e-24
KEGG_PATHWAY	cel03010:Ribosome	41	7.04467	2.48015e-11	WBGENE00004409, WBGENE00015025, WBGENE00015487, WBGENE00004447, WBGENE00020717, WBGENE00004445, WBGENE00004489, WBGENE00004429, WBGENE00004428, WBGENE00004427, WBGENE00004492, WBGENE00004470, WBGENE00004498, WBGENE00004410, WBGENE00004497, WBGENE00004431, WBGENE00004496, WBGENE00016249, WBGENE00012244, WBGENE00017997, WBGENE00017319, WBGENE00010624, WBGENE00012645, WBGENE00004419, WBGENE00012361,…	208	119	1794	2.97164	2.18253e-09	1.09127e-09	1.09127e-07
GOTERM_CC_DIRECT	mitochondrial ribosome	36	6.17										#NUM!
GOTERM_CC_DIRECT	GO:0032040~small-subunit processome	35	6.01375	2.00987e-22	WBGENE00015461, WBGENE00018891, WBGENE00022852, WBGENE00013144, WBGENE00045433, WBGENE00021660, WBGENE00013143, WBGENE00020915, WBGENE00003059, WBGENE00022739, WBGENE00021789, WBGENE00008455, WBGENE00010582, WBGENE00017855, WBGENE00018866, WBGENE00017435, WBGENE00010627, WBGENE00011311, WBGENE00012887, WBGENE00014083, WBGENE00022742, WBGENE00016740, WBGENE00004477, WBGENE00002850, WBGENE00007623,…	504	44	3860	6.09217	4.01974e-20	2.00987e-20	1.80888e-18	21.6968
GOTERM_BP_DIRECT	GO:0042273~ribosomal large subunit biogenesis	18	3.09278	3.80235e-13	WBGENE00018893, WBGENE00022765, WBGENE00020297, WBGENE00001234, WBGENE00004447, WBGENE00007617, WBGENE00004437, WBGENE00003063, WBGENE00012978, WBGENE00011538, WBGENE00016607, WBGENE00007413, WBGENE00013958, WBGENE00010562, WBGENE00015809, WBGENE00015941, WBGENE00017347, WBGENE00012676	453	20	3542	7.03709	2.06096e-10	5.14268e-11	4.91454e-09	12.4199
GOTERM_MF_DIRECT	GO:0008168~methyltransferase activity	26	4.46735	6.11227e-09	WBGENE00043057, WBGENE00020498, WBGENE00019168, WBGENE00015282, WBGENE00021686, WBGENE00011281, WBGENE00019241, WBGENE00194707, WBGENE00015160, WBGENE00008455, WBGENE00021492, WBGENE00021073, WBGENE00012205, WBGENE00020189, WBGENE00013151, WBGENE00006613, WBGENE00022107, WBGENE00001423, WBGENE00007194, WBGENE00009352, WBGENE00012652, WBGENE00022173, WBGENE00018513, WBGENE00009131, WBGENE00013766,…	462	57	3564	3.5188	2.4449e-06	6.11227e-07	5.89834e-05
GOTERM_CC_DIRECT	cytosolic ribosome	25	4.2										#NUM!
KEGG_PATHWAY	cytosolic ribosome	25	4.2
GOTERM_MF_DIRECT	GO:0000166~nucleotide binding	24	4.12371	9.54299e-05	WBGENE00044344, WBGENE00003815, WBGENE00020682, WBGENE00006945, WBGENE00001498, WBGENE00006617, WBGENE00001497, WBGENE00001337, WBGENE00000796, WBGENE00003415, WBGENE00004679, WBGENE00002238, WBGENE00044924, WBGENE00010732, WBGENE00001094, WBGENE00003074, WBGENE00005663, WBGENE00003073, WBGENE00010089, WBGENE00004189, WBGENE00002152, WBGENE00000197, WBGENE00013677, WBGENE00017759	462	79	3564	2.34358	0.0374543	0.003181	0.306966
GOTERM_BP_DIRECT	GO:0008033~tRNA processing	23	3.95189	3.98117e-12	WBGENE00021377, WBGENE00019264, WBGENE00021686, WBGENE00011281, WBGENE00015486, WBGENE00022420, WBGENE00016674, WBGENE00016653, WBGENE00022363, WBGENE00014123, WBGENE00022166, WBGENE00004248, WBGENE00138717, WBGENE00006567, WBGENE00194707, WBGENE00007603, WBGENE00006613, WBGENE00013738, WBGENE00006566, WBGENE00007101, WBGENE00018866, WBGENE00012205, WBGENE00012998	453	35	3542	5.13819	2.15778e-09	4.30763e-10	4.11653e-08	11.4
GOTERM_MF_DIRECT	GO:0000049~tRNA binding	21	3.60825	5.93474e-11	WBGENE00021466, WBGENE00021686, WBGENE00014123, WBGENE00022463, WBGENE00001497, WBGENE00003415, WBGENE00006613, WBGENE00022107, WBGENE00002238, WBGENE00005663, WBGENE00010089, WBGENE00002152, WBGENE00000197, WBGENE00018866, WBGENE00018513, WBGENE00009131, WBGENE00022195, WBGENE00007581, WBGENE00012205, WBGENE00012997, WBGENE00016978	462	32	3564	5.0625	2.3739e-08	7.91298e-09	7.63603e-07
PFAM	PF00400:WD40	21	3.60825	0.000690144	WBGENE00018893, WBGENE00000768, WBGENE00003806, WBGENE00018891, WBGENE00022742, WBGENE00021276, WBGENE00022420, WBGENE00013143, WBGENE00021899, WBGENE00010435, WBGENE00004185, WBGENE00012978, WBGENE00012858, WBGENE00013738, WBGENE00009211, WBGENE00020171, WBGENE00021074, WBGENE00017435, WBGENE00015104, WBGENE00012479, WBGENE00013735	531	75	4208	2.21891	0.339607	0.138489	13.8489
GOTERM_MF_DIRECT	GO:0005525~GTP binding	21	3.60825	0.0741417	WBGENE00022862, WBGENE00021466, WBGENE00013001, WBGENE00016496, WBGENE00013550, WBGENE00020297, WBGENE00006539, WBGENE00001661, WBGENE00001167, WBGENE00003821, WBGENE00010732, WBGENE00008456, WBGENE00006497, WBGENE00016907, WBGENE00003596, WBGENE00009246, WBGENE00022021, WBGENE00016844, WBGENE00012344, WBGENE00015346, WBGENE00012126	462	111	3564	1.45946	1	0.845759	81.6158
GOTERM_CC_DIRECT	GO:0005654~nucleoplasm	19	3.2646	0.000321121	WBGENE00018893, WBGENE00021655, WBGENE00012692, WBGENE00022232, WBGENE00001001, WBGENE00000796, WBGENE00000931, WBGENE00001423, WBGENE00003821, WBGENE00007201, WBGENE00003063, WBGENE00004185, WBGENE00012978, WBGENE00007413, WBGENE00012929, WBGENE00018513, WBGENE00009131, WBGENE00013435, WBGENE00016978	504	59	3860	2.46637	0.0622149	0.00428161	0.385345	3.49333
GOTERM_MF_DIRECT	GO:0003677~DNA binding	19	3.2646	0.0534614	WBGENE00022765, WBGENE00021347, WBGENE00021785, WBGENE00017830, WBGENE00013680, WBGENE00017300, WBGENE00016750, WBGENE00019246, WBGENE00019380, WBGENE00003148, WBGENE00007355, WBGENE00012999, WBGENE00004046, WBGENE00008781, WBGENE00010230, WBGENE00019800, WBGENE00012996, WBGENE00017749, WBGENE00011743	462	94	3564	1.55927	1	0.710904	68.6023
GOTERM_BP_DIRECT	GO:0032259~methylation	26	4.46735	1.82442e-09	WBGENE00043057, WBGENE00020498, WBGENE00019168, WBGENE00015282, WBGENE00021686, WBGENE00011281, WBGENE00019241, WBGENE00194707, WBGENE00015160, WBGENE00008455, WBGENE00021492, WBGENE00021073, WBGENE00012205, WBGENE00020189, WBGENE00013151, WBGENE00006613, WBGENE00022107, WBGENE00001423, WBGENE00007194, WBGENE00009352, WBGENE00012652, WBGENE00022173, WBGENE00018513, WBGENE00009131, WBGENE00013766,…	453	55	3542	3.69625	9.88837e-07	1.64502e-07	1.57205e-05	8.73887
KEGG_PATHWAY	cel00970:Aminoacyl-tRNA biosynthesis	18	3.09278	1.32635e-08	WBGENE00003815, WBGENE00006945, WBGENE00001498, WBGENE00006617, WBGENE00001497, WBGENE00001337, WBGENE00003415, WBGENE00004679, WBGENE00002238, WBGENE00001094, WBGENE00003074, WBGENE00005663, WBGENE00003073, WBGENE00002001, WBGENE00004189, WBGENE00002152, WBGENE00000197, WBGENE00013677	208	33	1794	4.70455	1.16718e-06	2.91796e-07	2.91796e-05
GOTERM_MF_DIRECT	GO:0004812~aminoacyl-tRNA ligase activity	18	3.09278	5.25975e-08	WBGENE00003815, WBGENE00006945, WBGENE00001498, WBGENE00006617, WBGENE00001497, WBGENE00001337, WBGENE00003415, WBGENE00004679, WBGENE00002238, WBGENE00001094, WBGENE00003074, WBGENE00005663, WBGENE00003073, WBGENE00002001, WBGENE00004189, WBGENE00002152, WBGENE00000197, WBGENE00013677	462	32	3564	4.33929	2.10388e-05	4.2078e-06	0.000406053
GOTERM_BP_DIRECT	GO:0030490~maturation of SSU-rRNA	11	1.89003	5.43957e-08	WBGENE00007312, WBGENE00010896, WBGENE00004497, WBGENE00019698, WBGENE00021660, WBGENE00011032, WBGENE00018679, WBGENE00017435, WBGENE00013688, WBGENE00021843, WBGENE00008934	453	12	3542	7.1674	2.94821e-05	4.20401e-06	0.000401751	7.26444
GOTERM_BP_DIRECT	GO:0006351~DNA-templated transcription	15	2.57732	1.45841e-07	WBGENE00021347, WBGENE00019275, WBGENE00017830, WBGENE00013680, WBGENE00017300, WBGENE00016750, WBGENE00014111, WBGENE00019246, WBGENE00022309, WBGENE00007355, WBGENE00012999, WBGENE00008781, WBGENE00010230, WBGENE00021061, WBGENE00017749	453	24	3542	4.88687	7.90428e-05	9.86251e-06	0.000942499	6.83612
GOTERM_CC_DIRECT	GO:0000428~DNA-directed RNA polymerase complex	17	2.92096	5.65284e-10	WBGENE00021347, WBGENE00019275, WBGENE00017830, WBGENE00013680, WBGENE00021112, WBGENE00017300, WBGENE00016750, WBGENE00014111, WBGENE00019246, WBGENE00021638, WBGENE00022309, WBGENE00044924, WBGENE00007355, WBGENE00012999, WBGENE00008781, WBGENE00010230, WBGENE00017749	504	23	3860	5.6608	1.13057e-07	1.41321e-08	1.27189e-06	9.24773
GOTERM_CC_DIRECT	GO:0030687~preribosome, large subunit precursor	16	2.74914	4.66144e-12	WBGENE00018893, WBGENE00019168, WBGENE00012351, WBGENE00018762, WBGENE00001234, WBGENE00007617, WBGENE00003063, WBGENE00012978, WBGENE00011538, WBGENE00003062, WBGENE00016607, WBGENE00009711, WBGENE00015809, WBGENE00015941, WBGENE00017347, WBGENE00015811	504	17	3860	7.20822	9.32299e-10	1.55381e-10	1.39843e-08	11.3315
KEGG_PATHWAY	cel03020:RNA polymerase	16	2.74914	1.12677e-09	WBGENE00021347, WBGENE00019275, WBGENE00017830, WBGENE00021112, WBGENE00017300, WBGENE00016750, WBGENE00014111, WBGENE00019246, WBGENE00021638, WBGENE00022309, WBGENE00044924, WBGENE00007355, WBGENE00012999, WBGENE00008781, WBGENE00010230, WBGENE00021061	208	23	1794	6	9.9156e-08	3.3052e-08	3.3052e-06
GOTERM_CC_DIRECT	GO:0005762~mitochondrial large ribosomal subunit	16	2.74914	2.91704e-06	WBGENE00018793, WBGENE00044321, WBGENE00012361, WBGENE00015133, WBGENE00021935, WBGENE00007712, WBGENE00008459, WBGENE00008514, WBGENE00021327, WBGENE00016249, WBGENE00019838, WBGENE00018932, WBGENE00011740, WBGENE00011883, WBGENE00011247, WBGENE00012645	504	32	3860	3.82937	0.000583238	5.71699e-05	0.00514529	5.53506
GOTERM_BP_DIRECT	GO:0000463~maturation of LSU-rRNA from tricistronic rRNA transcript (SSU-rRNA, 5.8S rRNA, LSU-rRNA)	11	1.89003	2.08943e-07	WBGENE00018893, WBGENE00019168, WBGENE00021830, WBGENE00003063, WBGENE00012978, WBGENE00003062, WBGENE00008688, WBGENE00006489, WBGENE00011408, WBGENE00015232, WBGENE00004418	453	13	3542	6.61606	0.000113241	1.25598e-05	0.00120026	6.67997
GOTERM_CC_DIRECT	GO:0022625~cytosolic large ribosomal subunit	16	2.74914	0.000455796	WBGENE00004409, WBGENE00004419, WBGENE00004414, WBGENE00004447, WBGENE00004413, WBGENE00004445, WBGENE00004429, WBGENE00004418, WBGENE00004428, WBGENE00004427, WBGENE00004415, WBGENE00004421, WBGENE00004410, WBGENE00004431, WBGENE00004442, WBGENE00012179	504	46	3860	2.66391	0.0871465	0.00569745	0.51277	3.34123
GOTERM_BP_DIRECT	GO:0000462~maturation of SSU-rRNA from tricistronic rRNA transcript (SSU-rRNA, 5.8S rRNA, LSU-rRNA)	12	2.06186	3.12544e-07	WBGENE00006497, WBGENE00018891, WBGENE00022742, WBGENE00020389, WBGENE00009211, WBGENE00010582, WBGENE00022021, WBGENE00003059, WBGENE00022739, WBGENE00011311, WBGENE00004477, WBGENE00017989	453	16	3542	5.86424	0.000169384	1.69086e-05	0.00161585	6.50509
GOTERM_MF_DIRECT	GO:0003743~translation initiation factor activity	15	2.57732	0.000207738	WBGENE00001209, WBGENE00021466, WBGENE00021351, WBGENE00016496, WBGENE00019543, WBGENE00001234, WBGENE00020868, WBGENE00001233, WBGENE00001227, WBGENE00001225, WBGENE00001226, WBGENE00002060, WBGENE00001230, WBGENE00010560, WBGENE00015920	462	39	3564	2.96703	0.0797445	0.00639194	0.616823
GOTERM_CC_DIRECT	GO:0005666~RNA polymerase III complex	14	2.4055	2.2259e-10	WBGENE00021347, WBGENE00019275, WBGENE00017830, WBGENE00021112, WBGENE00017300, WBGENE00016750, WBGENE00014111, WBGENE00019246, WBGENE00021638, WBGENE00022309, WBGENE00044924, WBGENE00007355, WBGENE00010230, WBGENE00021061	504	15	3860	7.14815	4.45181e-08	6.35972e-09	5.72375e-07	9.65249
GOTERM_BP_DIRECT	GO:0006396~RNA processing	18	3.09278	3.9637e-07	WBGENE00020498, WBGENE00022852, WBGENE00004914, WBGENE00016653, WBGENE00010709, WBGENE00021715, WBGENE00002850, WBGENE00019241, WBGENE00000796, WBGENE00008514, WBGENE00007603, WBGENE00022107, WBGENE00010478, WBGENE00010089, WBGENE00004387, WBGENE00012465, WBGENE00007581, WBGENE00021073	453	36	3542	3.90949	0.000214809	1.94942e-05	0.00186294	6.4019
GOTERM_CC_DIRECT	GO:0005763~mitochondrial small ribosomal subunit	14	2.4055	3.14434e-06	WBGENE00000933, WBGENE00015487, WBGENE00023487, WBGENE00007859, WBGENE00021920, WBGENE00007564, WBGENE00014224, WBGENE00010905, WBGENE00012244, WBGENE00016412, WBGENE00012697, WBGENE00012830, WBGENE00017319, WBGENE00010624	504	25	3860	4.28889	0.000628672	5.71699e-05	0.00514529	5.50247
GOTERM_BP_DIRECT	GO:0000470~maturation of LSU-rRNA	9	1.54639	5.32494e-07	WBGENE00021830, WBGENE00007312, WBGENE00009711, WBGENE00004419, WBGENE00012351, WBGENE00018762, WBGENE00001234, WBGENE00021073, WBGENE00015811	453	9	3542	7.81898	0.00028857	2.40066e-05	0.00229416	6.27369
PFAM	PF00270:DEAD	14	2.4055	0.000182375	WBGENE00018890, WBGENE00022148, WBGENE00021277, WBGENE00022792, WBGENE00011032, WBGENE00015232, WBGENE00001598, WBGENE00010260, WBGENE00016194, WBGENE00016073, WBGENE00012342, WBGENE00019219, WBGENE00012059, WBGENE00013983	531	35	4208	3.16987	0.103823	0.0548949	5.48949
PFAM	PF00271:Helicase_C	14	2.4055	0.0013645	WBGENE00018890, WBGENE00022148, WBGENE00021277, WBGENE00022792, WBGENE00011032, WBGENE00015232, WBGENE00001598, WBGENE00010260, WBGENE00016194, WBGENE00016073, WBGENE00012342, WBGENE00019219, WBGENE00012059, WBGENE00013983	531	42	4208	2.64156	0.559844	0.164286	16.4286
GOTERM_MF_DIRECT	GO:0004386~helicase activity	14	2.4055	0.00908441	WBGENE00018890, WBGENE00022148, WBGENE00021277, WBGENE00022792, WBGENE00011032, WBGENE00015232, WBGENE00001598, WBGENE00010260, WBGENE00016194, WBGENE00016073, WBGENE00012342, WBGENE00019219, WBGENE00012059, WBGENE00013983	462	50	3564	2.16	0.974019	0.191251	18.4557
GOTERM_MF_DIRECT	GO:0019843~rRNA binding	13	2.23368	5.27174e-05	WBGENE00021830, WBGENE00002804, WBGENE00014083, WBGENE00019678, WBGENE00016740, WBGENE00004413, WBGENE00008456, WBGENE00003062, WBGENE00009711, WBGENE00008688, WBGENE00012992, WBGENE00012179, WBGENE00012652	462	27	3564	3.71429	0.0208667	0.001917	0.18499
GOTERM_MF_DIRECT	GO:0003724~RNA helicase activity	13	2.23368	0.000950117	WBGENE00018890, WBGENE00022148, WBGENE00021277, WBGENE00022792, WBGENE00011032, WBGENE00015232, WBGENE00001598, WBGENE00010260, WBGENE00016073, WBGENE00012342, WBGENE00019219, WBGENE00012059, WBGENE00013983	462	35	3564	2.86531	0.316294	0.0253364	2.44497
GOTERM_BP_DIRECT	GO:0002181~cytoplasmic translation	14	2.4055	2.44623e-06	WBGENE00004409, WBGENE00011281, WBGENE00004447, WBGENE00004413, WBGENE00004445, WBGENE00004429, WBGENE00004427, WBGENE00005663, WBGENE00004492, WBGENE00004498, WBGENE00009189, WBGENE00004497, WBGENE00015346, WBGENE00012126	453	25	3542	4.37863	0.00132498	0.000101801	0.00972847	5.6115
GOTERM_BP_DIRECT	GO:0006418~tRNA aminoacylation for protein translation	14	2.4055	4.33052e-06	WBGENE00003815, WBGENE00006945, WBGENE00006617, WBGENE00001337, WBGENE00003415, WBGENE00004679, WBGENE00002238, WBGENE00001094, WBGENE00003074, WBGENE00005663, WBGENE00003073, WBGENE00004189, WBGENE00002152, WBGENE00013677	453	26	3542	4.21022	0.0023444	0.000167344	0.015992	5.36346
GOTERM_BP_DIRECT	GO:0030488~tRNA methylation	9	1.54639	2.05509e-05	WBGENE00020498, WBGENE00007312, WBGENE00021686, WBGENE00011281, WBGENE00022420, WBGENE00014120, WBGENE00007581, WBGENE00194707, WBGENE00012205	453	12	3542	5.86424	0.0110769	0.000741201	0.070832	4.68717
GOTERM_BP_DIRECT	GO:0000460~maturation of 5.8S rRNA	7	1.20275	2.61888e-05	WBGENE00009711, WBGENE00021785, WBGENE00012351, WBGENE00018762, WBGENE00012342, WBGENE00001234, WBGENE00015811	453	7	3542	7.81898	0.0140943	0.00088551	0.0846227	4.58188
GOTERM_MF_DIRECT	GO:0003899~DNA-directed 5'-3' RNA polymerase activity	11	1.89003	1.96019e-06	WBGENE00007355, WBGENE00012999, WBGENE00021347, WBGENE00019275, WBGENE00017830, WBGENE00008781, WBGENE00013680, WBGENE00017300, WBGENE00010230, WBGENE00019246, WBGENE00022309	462	15	3564	5.65714	0.000783768	0.000130679	0.0126105
GOTERM_CC_DIRECT	GO:0005581~collagen trimer	11	1.89003	0.00570677	WBGENE00000713, WBGENE00000668, WBGENE00000712, WBGENE00002280, WBGENE00000716, WBGENE00000751, WBGENE00000675, WBGENE00000656, WBGENE00000733, WBGENE00000601, WBGENE00000754	504	32	3860	2.63269	0.681656	0.0518797	4.66917	2.24361
GOTERM_CC_DIRECT	GO:0043186~P granule	11	1.89003	0.0598625	WBGENE00004914, WBGENE00022148, WBGENE00021277, WBGENE00004046, WBGENE00022792, WBGENE00015232, WBGENE00019219, WBGENE00001598, WBGENE00010260, WBGENE00012059, WBGENE00013983	504	45	3860	1.87213	0.999996	0.332569	29.9313	1.22285
GOTERM_MF_DIRECT	GO:0051082~unfolded protein binding	11	1.89003	0.0736772	WBGENE00021655, WBGENE00018782, WBGENE00000915, WBGENE00002020, WBGENE00020110, WBGENE00020391, WBGENE00022042, WBGENE00002024, WBGENE00000379, WBGENE00000378, WBGENE00002017	462	47	3564	1.80547	1	0.845759	81.6158
GOTERM_CC_DIRECT	GO:0033290~eukaryotic 48S preinitiation complex	10	1.71821	1.10491e-05	WBGENE00001209, WBGENE00001230, WBGENE00021351, WBGENE00019543, WBGENE00015920, WBGENE00001233, WBGENE00011730, WBGENE00001227, WBGENE00001225, WBGENE00001226	504	14	3860	5.47052	0.00220739	0.000184151	0.0165736	4.95667
PFAM	PF01484:Col_cuticle_N	10	1.71821	0.00923761	WBGENE00000713, WBGENE00000668, WBGENE00000712, WBGENE00000716, WBGENE00000751, WBGENE00000675, WBGENE00000656, WBGENE00000733, WBGENE00000601, WBGENE00000754	531	30	4208	2.64156	0.996218	0.794435	79.4435
GOTERM_MF_DIRECT	GO:0042302~structural constituent of cuticle	10	1.71821	0.0136678	WBGENE00000713, WBGENE00000668, WBGENE00000712, WBGENE00000716, WBGENE00000751, WBGENE00000675, WBGENE00000656, WBGENE00000733, WBGENE00000601, WBGENE00000754	462	31	3564	2.48848	0.995933	0.273356	26.3788
GOTERM_BP_DIRECT	GO:0001732~formation of cytoplasmic translation initiation complex	9	1.54639	4.74978e-05	WBGENE00001209, WBGENE00001230, WBGENE00016496, WBGENE00019543, WBGENE00015920, WBGENE00001233, WBGENE00001227, WBGENE00001225, WBGENE00001226	453	13	3542	5.41314	0.0254159	0.00151155	0.144449	4.32333
GOTERM_CC_DIRECT	GO:0005736~RNA polymerase I complex	9	1.54639	6.31345e-07	WBGENE00007355, WBGENE00012999, WBGENE00021347, WBGENE00019275, WBGENE00017830, WBGENE00008781, WBGENE00010230, WBGENE00019246, WBGENE00017749	504	9	3860	7.65873	0.000126261	1.40299e-05	0.00126269	6.19973
GOTERM_BP_DIRECT	GO:0006413~translational initiation	16	2.74914	5.86867e-05	WBGENE00001209, WBGENE00021466, WBGENE00021351, WBGENE00016496, WBGENE00019543, WBGENE00001234, WBGENE00020868, WBGENE00001233, WBGENE00001227, WBGENE00001225, WBGENE00001226, WBGENE00012714, WBGENE00002060, WBGENE00001230, WBGENE00010560, WBGENE00015920	453	40	3542	3.12759	0.0313085	0.00176386	0.168561	4.23146
GOTERM_BP_DIRECT	GO:0001522~pseudouridine synthesis	7	1.20275	9.34559e-05	WBGENE00010478, WBGENE00013967, WBGENE00022046, WBGENE00007101, WBGENE00004248, WBGENE00009132, WBGENE00012998	453	8	3542	6.84161	0.0493938	0.00266103	0.254298	4.02939
GOTERM_CC_DIRECT	GO:0016282~eukaryotic 43S preinitiation complex	9	1.54639	5.56784e-05	WBGENE00001209, WBGENE00001230, WBGENE00019543, WBGENE00015920, WBGENE00020868, WBGENE00001233, WBGENE00001227, WBGENE00001225, WBGENE00001226	504	13	3860	5.3022	0.0110742	0.000856591	0.0770932	4.25431
GOTERM_BP_DIRECT	GO:0006400~tRNA modification	8	1.37457	0.00023431	WBGENE00006566, WBGENE00022420, WBGENE00022166, WBGENE00017776, WBGENE00022195, WBGENE00006567, WBGENE00006613, WBGENE00012205	453	12	3542	5.21266	0.119276	0.00633808	0.605691	3.63021
PFAM	PF01391:Collagen	9	1.54639	0.00916786	WBGENE00000713, WBGENE00000668, WBGENE00002280, WBGENE00000751, WBGENE00000675, WBGENE00000656, WBGENE00000733, WBGENE00000601, WBGENE00000754	531	25	4208	2.85288	0.996055	0.794435	79.4435
GOTERM_CC_DIRECT	GO:0022627~cytosolic small ribosomal subunit	9	1.54639	0.0226339	WBGENE00004470, WBGENE00004492, WBGENE00004498, WBGENE00004497, WBGENE00004496, WBGENE00004484, WBGENE00004479, WBGENE00004489, WBGENE00004477	504	28	3860	2.46173	0.989733	0.174107	15.6696	1.64524
GOTERM_MF_DIRECT	GO:0030515~snoRNA binding	8	1.37457	4.13699e-06	WBGENE00014083, WBGENE00016740, WBGENE00000276, WBGENE00020171, WBGENE00020915, WBGENE00010627, WBGENE00022739, WBGENE00017435	462	8	3564	7.71429	0.00165343	0.00020685	0.019961
GOTERM_MF_DIRECT	GO:0001054~RNA polymerase I activity	8	1.37457	4.13699e-06	WBGENE00007355, WBGENE00012999, WBGENE00021347, WBGENE00019275, WBGENE00017830, WBGENE00008781, WBGENE00010230, WBGENE00019246	462	8	3564	7.71429	0.00165343	0.00020685	0.019961
GOTERM_MF_DIRECT	GO:0001056~RNA polymerase III activity	8	1.37457	1.6541e-05	WBGENE00007355, WBGENE00021347, WBGENE00019275, WBGENE00017830, WBGENE00017300, WBGENE00010230, WBGENE00019246, WBGENE00022309	462	9	3564	6.85714	0.00659461	0.00066164	0.0638483
PFAM	PF01926:MMR_HSR1	8	1.37457	4.12555e-05	WBGENE00008456, WBGENE00016907, WBGENE00003596, WBGENE00013001, WBGENE00012344, WBGENE00015346, WBGENE00012126, WBGENE00003821	531	10	4208	6.33974	0.0244902	0.0248358	2.48358
GOTERM_BP_DIRECT	GO:0032543~mitochondrial translation	12	2.06186	0.000516643	WBGENE00002804, WBGENE00003074, WBGENE00023487, WBGENE00002001, WBGENE00015487, WBGENE00010905, WBGENE00012244, WBGENE00018932, WBGENE00012697, WBGENE00011740, WBGENE00007712, WBGENE00010624	453	29	3542	3.23544	0.244286	0.0131288	1.25464	3.28681
GOTERM_BP_DIRECT	GO:0006383~transcription by RNA polymerase III	6	1.03093	0.000558155	WBGENE00019275, WBGENE00017830, WBGENE00021112, WBGENE00017300, WBGENE00010230, WBGENE00021638	453	7	3542	6.70199	0.261109	0.0131288	1.25464	3.25325
GOTERM_CC_DIRECT	GO:0005852~eukaryotic translation initiation factor 3 complex	8	1.37457	0.000919232	WBGENE00001209, WBGENE00001230, WBGENE00019543, WBGENE00015920, WBGENE00001233, WBGENE00001227, WBGENE00001225, WBGENE00001226	504	14	3860	4.37642	0.168007	0.0108145	0.973305	3.03657
GOTERM_BP_DIRECT	GO:0006360~transcription by RNA polymerase I	6	1.03093	0.000558155	WBGENE00007355, WBGENE00012999, WBGENE00021347, WBGENE00019275, WBGENE00017830, WBGENE00008781	453	7	3542	6.70199	0.261109	0.0131288	1.25464	3.25325
GOTERM_MF_DIRECT	GO:0043022~ribosome binding	8	1.37457	0.00350099	WBGENE00010732, WBGENE00022862, WBGENE00021351, WBGENE00002065, WBGENE00001234, WBGENE00001233, WBGENE00001167, WBGENE00001029	462	17	3564	3.63025	0.754106	0.0777998	7.50768
GOTERM_BP_DIRECT	GO:0000027~ribosomal large subunit assembly	8	1.37457	0.000805977	WBGENE00021830, WBGENE00003062, WBGENE00019678, WBGENE00004421, WBGENE00012692, WBGENE00021074, WBGENE00007617, WBGENE00017347	453	14	3542	4.46799	0.354039	0.0181681	1.73621	3.09368
GOTERM_BP_DIRECT	GO:0042274~ribosomal small subunit biogenesis	9	1.54639	0.00089895	WBGENE00022765, WBGENE00008455, WBGENE00008458, WBGENE00022852, WBGENE00016740, WBGENE00013144, WBGENE00018866, WBGENE00004477, WBGENE00021843	453	18	3542	3.90949	0.385809	0.0194533	1.85903	3.04626
GOTERM_CC_DIRECT	GO:0030686~90S preribosome	7	1.20275	0.00010571	WBGENE00010044, WBGENE00010582, WBGENE00013143, WBGENE00007050, WBGENE00022021, WBGENE00022739, WBGENE00008934	504	8	3860	6.70139	0.0209213	0.00151015	0.135913	3.97588
GOTERM_BP_DIRECT	GO:0045727~positive regulation of translation	7	1.20275	0.00109681	WBGENE00002060, WBGENE00022862, WBGENE00001230, WBGENE00020097, WBGENE00016653, WBGENE00021073, WBGENE00001423	453	11	3542	4.97572	0.448327	0.0228222	2.18097	2.95987
GOTERM_MF_DIRECT	GO:0140662~ATP-dependent protein folding chaperone	7	1.20275	0.0447717	WBGENE00018782, WBGENE00016250, WBGENE00000915, WBGENE00020110, WBGENE00020391, WBGENE00000379, WBGENE00000378	462	21	3564	2.57143	1	0.695487	67.1145
GOTERM_MF_DIRECT	GO:0051539~4 iron, 4 sulfur cluster binding	7	1.20275	0.0550951	WBGENE00008664, WBGENE00007488, WBGENE00021562, WBGENE00022363, WBGENE00014123, WBGENE00003831, WBGENE00017776	462	22	3564	2.45455	1	0.710904	68.6023
GOTERM_BP_DIRECT	GO:0002183~cytoplasmic translational initiation	8	1.37457	0.00134691	WBGENE00001209, WBGENE00001230, WBGENE00019543, WBGENE00010560, WBGENE00015920, WBGENE00001233, WBGENE00001225, WBGENE00001226	453	15	3542	4.17013	0.51834	0.0269881	2.57908	2.87066
GOTERM_BP_DIRECT	GO:0031167~rRNA methylation	5	0.859107	0.00317727	WBGENE00019168, WBGENE00020189, WBGENE00008455, WBGENE00009352, WBGENE00001423	453	6	3542	6.51582	0.821796	0.0613895	5.86661	2.49795
GOTERM_BP_DIRECT	GO:0009451~RNA modification	5	0.859107	0.00666943	WBGENE00010478, WBGENE00013967, WBGENE00007101, WBGENE00004248, WBGENE00012998	453	7	3542	5.58499	0.973403	0.124419	11.89	2.17591
GOTERM_MF_DIRECT	GO:0008173~RNA methyltransferase activity	6	1.03093	0.000595516	WBGENE00020498, WBGENE00013151, WBGENE00021686, WBGENE00021073, WBGENE00019241, WBGENE00022107	462	7	3564	6.61224	0.212016	0.0170147	1.64192
GOTERM_CC_DIRECT	GO:0030688~preribosome, small subunit precursor	6	1.03093	0.0014712	WBGENE00006497, WBGENE00019698, WBGENE00000276, WBGENE00008151, WBGENE00013688, WBGENE00021843	504	8	3860	5.74405	0.255063	0.0163466	1.4712	2.83233
GOTERM_CC_DIRECT	GO:0000178~exosome (RNase complex)	6	1.03093	0.00295739	WBGENE00007201, WBGENE00021785, WBGENE00009289, WBGENE00022232, WBGENE00001001, WBGENE00000796	504	9	3860	5.10582	0.446976	0.0311304	2.80174	2.52909
GOTERM_CC_DIRECT	GO:0000176~nuclear exosome (RNase complex)	6	1.03093	0.00528659	WBGENE00007201, WBGENE00009289, WBGENE00022232, WBGENE00001001, WBGENE00018305, WBGENE00000796	504	10	3860	4.59524	0.653587	0.0503485	4.53136	2.27682
GOTERM_BP_DIRECT	GO:0000466~maturation of 5.8S rRNA from tricistronic rRNA transcript (SSU-rRNA, 5.8S rRNA, LSU-rRNA)	4	0.687285	0.00747798	WBGENE00018893, WBGENE00019168, WBGENE00003063, WBGENE00012978	453	4	3542	7.81898	0.982893	0.130503	12.4713	2.12622
GOTERM_BP_DIRECT	GO:0042797~tRNA transcription by RNA polymerase III	4	0.687285	0.00747798	WBGENE00007355, WBGENE00021347, WBGENE00019246, WBGENE00021061	453	4	3542	7.81898	0.982893	0.130503	12.4713	2.12622
PFAM	PF00009:GTP_EFTU	6	1.03093	0.0415255	WBGENE00010732, WBGENE00022862, WBGENE00021466, WBGENE00009246, WBGENE00001167, WBGENE00003821	531	16	4208	2.97175	1	1	100
PFAM	PF04427:Brix	5	0.859107	0.00112114	WBGENE00021830, WBGENE00014083, WBGENE00003062, WBGENE00009711, WBGENE00019678	531	5	4208	7.92467	0.490427	0.164286	16.4286
GOTERM_MF_DIRECT	GO:0009982~pseudouridine synthase activity	5	0.859107	0.00124173	WBGENE00010478, WBGENE00013967, WBGENE00007101, WBGENE00004248, WBGENE00012998	462	5	3564	7.71429	0.391647	0.0292172	2.81946
GOTERM_MF_DIRECT	GO:0043024~ribosomal small subunit binding	5	0.859107	0.00124173	WBGENE00002804, WBGENE00008456, WBGENE00012714, WBGENE00020868, WBGENE00011730	462	5	3564	7.71429	0.391647	0.0292172	2.81946
GOTERM_BP_DIRECT	GO:0000028~ribosomal small subunit assembly	6	1.03093	0.00791002	WBGENE00008456, WBGENE00018891, WBGENE00004497, WBGENE00013892, WBGENE00004496, WBGENE00004484	453	11	3542	4.2649	0.986489	0.133729	12.7796	2.10182
GOTERM_CC_DIRECT	GO:0017101~aminoacyl-tRNA synthetase multienzyme complex	5	0.859107	0.00344193	WBGENE00001094, WBGENE00004189, WBGENE00001337, WBGENE00003415, WBGENE00002238	504	6	3860	6.38228	0.49821	0.0344193	3.09774	2.4632
GOTERM_BP_DIRECT	GO:0006457~protein folding	18	3.09278	0.00875048	WBGENE00001429, WBGENE00000877, WBGENE00018782, WBGENE00016250, WBGENE00000915, WBGENE00021475, WBGENE00011032, WBGENE00020110, WBGENE00003962, WBGENE00001430, WBGENE00000379, WBGENE00020999, WBGENE00000378, WBGENE00003964, WBGENE00015916, WBGENE00001073, WBGENE00001020, WBGENE00020391	453	73	3542	1.92797	0.991465	0.143455	13.7091	2.05797
GOTERM_CC_DIRECT	GO:0000177~cytoplasmic exosome (RNase complex)	5	0.859107	0.0129438	WBGENE00007201, WBGENE00009289, WBGENE00022232, WBGENE00001001, WBGENE00018305	504	8	3860	4.78671	0.926145	0.10355	9.3195	1.88794
GOTERM_CC_DIRECT	GO:0005665~RNA polymerase II, core complex	5	0.859107	0.0443335	WBGENE00007355, WBGENE00021347, WBGENE00017830, WBGENE00017356, WBGENE00019246	504	11	3860	3.48124	0.999885	0.281527	25.3375	1.35327
GOTERM_CC_DIRECT	GO:0015935~small ribosomal subunit	5	0.859107	0.0443335	WBGENE00000933, WBGENE00004492, WBGENE00004487, WBGENE00004484, WBGENE00004489	504	11	3860	3.48124	0.999885	0.281527	25.3375	1.35327
GOTERM_MF_DIRECT	GO:0003746~translation elongation factor activity	5	0.859107	0.0761183	WBGENE00008920, WBGENE00009246, WBGENE00002065, WBGENE00018846, WBGENE00001167	462	13	3564	2.96703	1	0.845759	81.6158
GOTERM_BP_DIRECT	GO:0006414~translational elongation	6	1.03093	0.0247534	WBGENE00008920, WBGENE00004409, WBGENE00009246, WBGENE00002065, WBGENE00018846, WBGENE00001167	453	14	3542	3.35099	0.999999	0.39387	37.6397	1.60637
GOTERM_BP_DIRECT	GO:0071035~nuclear polyadenylation-dependent rRNA catabolic process	4	0.687285	0.030679	WBGENE00009289, WBGENE00022232, WBGENE00018305, WBGENE00000796	453	6	3542	5.21266	1	0.448577	42.8677	1.51316
GOTERM_CC_DIRECT	GO:0031428~box C/D methylation guide snoRNP complex	4	0.687285	0.00794921	WBGENE00010896, WBGENE00020915, WBGENE00010627, WBGENE00001423	504	4	3860	7.65873	0.797334	0.0662435	5.96191	2.09968
GOTERM_CC_DIRECT	GO:0034388~Pwp2p-containing subcomplex of 90S preribosome	4	0.687285	0.00794921	WBGENE00018891, WBGENE00017435, WBGENE00015104, WBGENE00012887	504	4	3860	7.65873	0.797334	0.0662435	5.96191	2.09968
GOTERM_MF_DIRECT	GO:0034511~U3 snoRNA binding	4	0.687285	0.0175807	WBGENE00006497, WBGENE00013143, WBGENE00020171, WBGENE00022021	462	5	3564	6.17143	0.999171	0.31965	30.8462
GOTERM_MF_DIRECT	GO:0043021~ribonucleoprotein complex binding	4	0.687285	0.0175807	WBGENE00018893, WBGENE00003063, WBGENE00012978, WBGENE00004409	462	5	3564	6.17143	0.999171	0.31965	30.8462
PFAM	PF00679:EFG_C	4	0.687285	0.0296337	WBGENE00010732, WBGENE00022862, WBGENE00009246, WBGENE00001167	531	6	4208	5.28311	1	1	100
GOTERM_BP_DIRECT	GO:0071038~TRAMP-dependent tRNA surveillance pathway	4	0.687285	0.030679	WBGENE00009289, WBGENE00022232, WBGENE00018305, WBGENE00000796	453	6	3542	5.21266	1	0.448577	42.8677	1.51316
GOTERM_BP_DIRECT	GO:0000467~exonucleolytic trimming to generate mature 3'-end of 5.8S rRNA from tricistronic rRNA transcript (SSU-rRNA, 5.8S rRNA, LSU-rRNA)	4	0.687285	0.030679	WBGENE00009289, WBGENE00022232, WBGENE00018305, WBGENE00000796	453	6	3542	5.21266	1	0.448577	42.8677	1.51316
GOTERM_BP_DIRECT	GO:0000479~endonucleolytic cleavage of tricistronic rRNA transcript (SSU-rRNA, 5.8S rRNA, LSU-rRNA)	3	0.515464	0.0446276	WBGENE00006497, WBGENE00022852, WBGENE00022021	453	3	3542	7.81898	1	0.574846	54.9344	1.3504
GOTERM_BP_DIRECT	GO:0006362~transcription elongation by RNA polymerase I	3	0.515464	0.0446276	WBGENE00010230, WBGENE00019246, WBGENE00017749	453	3	3542	7.81898	1	0.574846	54.9344	1.3504
GOTERM_BP_DIRECT	GO:0000154~rRNA modification	3	0.515464	0.0446276	WBGENE00020189, WBGENE00008455, WBGENE00018866	453	3	3542	7.81898	1	0.574846	54.9344	1.3504
GOTERM_MF_DIRECT	GO:0034062~5'-3' RNA polymerase activity	4	0.687285	0.0504228	WBGENE00012999, WBGENE00008781, WBGENE00013680, WBGENE00017300	462	7	3564	4.40816	1	0.695487	67.1145
GOTERM_MF_DIRECT	GO:0008757~S-adenosylmethionine-dependent methyltransferase activity	4	0.687285	0.0504228	WBGENE00021492, WBGENE00007581, WBGENE00021073, WBGENE00022107	462	7	3564	4.40816	1	0.695487	67.1145
GOTERM_CC_DIRECT	GO:0022626~cytosolic ribosome	4	0.687285	0.0514112	WBGENE00004409, WBGENE00021697, WBGENE00004410, WBGENE00018339	504	7	3860	4.37642	0.999974	0.293779	26.4401	1.28894
GOTERM_CC_DIRECT	GO:0005761~mitochondrial ribosome	4	0.687285	0.0514112	WBGENE00000933, WBGENE00018793, WBGENE00012992, WBGENE00011740	504	7	3860	4.37642	0.999974	0.293779	26.4401	1.28894
GOTERM_BP_DIRECT	GO:0045943~positive regulation of transcription by RNA polymerase I	3	0.515464	0.0446276	WBGENE00021276, WBGENE00045433, WBGENE00022739	453	3	3542	7.81898	1	0.574846	54.9344	1.3504
GOTERM_MF_DIRECT	GO:0031369~translation initiation factor binding	4	0.687285	0.0731169	WBGENE00017356, WBGENE00010560, WBGENE00001225, WBGENE00001226	462	8	3564	3.85714	1	0.845759	81.6158
GOTERM_MF_DIRECT	GO:0001055~RNA polymerase II activity	4	0.687285	0.0731169	WBGENE00007355, WBGENE00021347, WBGENE00017830, WBGENE00019246	462	8	3564	3.85714	1	0.845759	81.6158
PFAM	PF00118:Cpn60_TCP1	4	0.687285	0.0933673	WBGENE00018782, WBGENE00020391, WBGENE00000379, WBGENE00000378	531	9	4208	3.52208	1	1	100
PFAM	PF02824:TGS	3	0.515464	0.0435358	WBGENE00006617, WBGENE00015346, WBGENE00012126	531	3	4208	7.92467	1	1	100
PFAM	PF13959:DUF4217	3	0.515464	0.0435358	WBGENE00021277, WBGENE00015232, WBGENE00013983	531	3	4208	7.92467	1	1	100
PFAM	PF01163:RIO1	3	0.515464	0.0435358	WBGENE00019698, WBGENE00138717, WBGENE00013688	531	3	4208	7.92467	1	1	100
PFAM	PF03914:CBF	3	0.515464	0.0435358	WBGENE00016508, WBGENE00020601, WBGENE00009084	531	3	4208	7.92467	1	1	100
PFAM	PF04003:Utp12	3	0.515464	0.0435358	WBGENE00018891, WBGENE00020389, WBGENE00017435	531	3	4208	7.92467	1	1	100
GOTERM_BP_DIRECT	GO:2000234~positive regulation of rRNA processing	3	0.515464	0.0446276	WBGENE00007312, WBGENE00013151, WBGENE00045433	453	3	3542	7.81898	1	0.574846	54.9344	1.3504
GOTERM_BP_DIRECT	GO:0034475~U4 snRNA 3'-end processing	4	0.687285	0.0486862	WBGENE00007201, WBGENE00009289, WBGENE00022232, WBGENE00018305	453	7	3542	4.46799	1	0.598619	57.2063	1.31259
GOTERM_BP_DIRECT	GO:0016075~rRNA catabolic process	4	0.687285	0.0486862	WBGENE00007201, WBGENE00009289, WBGENE00001001, WBGENE00018305	453	7	3542	4.46799	1	0.598619	57.2063	1.31259
GOTERM_BP_DIRECT	GO:0043039~tRNA aminoacylation	4	0.687285	0.0706942	WBGENE00000197, WBGENE00006617, WBGENE00001497, WBGENE00001337	453	8	3542	3.90949	1	0.849901	81.2197	1.15062
GOTERM_BP_DIRECT	GO:0006432~phenylalanyl-tRNA aminoacylation	3	0.515464	0.0817772	WBGENE00001498, WBGENE00021828, WBGENE00001497	453	4	3542	5.86424	1	0.884829	84.5576	1.08737
GOTERM_MF_DIRECT	GO:0008175~tRNA methyltransferase activity	3	0.515464	0.0457949	WBGENE00011281, WBGENE00007581, WBGENE00194707	462	3	3564	7.71429	1	0.695487	67.1145
GOTERM_MF_DIRECT	GO:1904047~S-adenosyl-L-methionine binding	3	0.515464	0.0457949	WBGENE00011281, WBGENE00018679, WBGENE00013766	462	3	3564	7.71429	1	0.695487	67.1145
GOTERM_MF_DIRECT	GO:0046975~histone H3K36 methyltransferase activity	3	0.515464	0.0457949	WBGENE00044070, WBGENE00022371, WBGENE00022173	462	3	3564	7.71429	1	0.695487	67.1145
GOTERM_CC_DIRECT	GO:0034457~Mpp10 complex	3	0.515464	0.046452	WBGENE00014083, WBGENE00016740, WBGENE00013544	504	3	3860	7.65873	0.999926	0.281527	25.3375	1.333
GOTERM_CC_DIRECT	GO:0005850~eukaryotic translation initiation factor 2 complex	3	0.515464	0.046452	WBGENE00021466, WBGENE00021351, WBGENE00010560	504	3	3860	7.65873	0.999926	0.281527	25.3375	1.333
GOTERM_CC_DIRECT	GO:0070545~PeBoW complex	3	0.515464	0.046452	WBGENE00018893, WBGENE00003063, WBGENE00012978	504	3	3860	7.65873	0.999926	0.281527	25.3375	1.333
GOTERM_CC_DIRECT	GO:0031429~box H/ACA snoRNP complex	3	0.515464	0.046452	WBGENE00010478, WBGENE00022046, WBGENE00012964	504	3	3860	7.65873	0.999926	0.281527	25.3375	1.333
PFAM	PF00152:tRNA-synt_2	3	0.515464	0.0798666	WBGENE00001094, WBGENE00003815, WBGENE00002238	531	4	4208	5.9435	1	1	100
PFAM	PF01336:tRNA_anti-codon	3	0.515464	0.0798666	WBGENE00001094, WBGENE00003815, WBGENE00002238	531	4	4208	5.9435	1	1	100
PFAM	PF01189:Methyltr_RsmB-F	3	0.515464	0.0798666	WBGENE00013151, WBGENE00021686, WBGENE00021073	531	4	4208	5.9435	1	1	100
PFAM	PF04055:Radical_SAM	3	0.515464	0.0798666	WBGENE00022363, WBGENE00014123, WBGENE00017776	531	4	4208	5.9435	1	1	100
GOTERM_BP_DIRECT	GO:0017183~protein histidyl modification to diphthamide	3	0.515464	0.0817772	WBGENE00007488, WBGENE00017087, WBGENE00007194	453	4	3542	5.86424	1	0.884829	84.5576	1.08737
GOTERM_BP_DIRECT	GO:0000054~ribosomal subunit export from nucleus	3	0.515464	0.0817772	WBGENE00016907, WBGENE00012714, WBGENE00001234	453	4	3542	5.86424	1	0.884829	84.5576	1.08737
GOTERM_BP_DIRECT	GO:0042256~cytosolic ribosome assembly	3	0.515464	0.0817772	WBGENE00010303, WBGENE00010732, WBGENE00001234	453	4	3542	5.86424	1	0.884829	84.5576	1.08737
GOTERM_BP_DIRECT	GO:0070475~rRNA base methylation	3	0.515464	0.0817772	WBGENE00013151, WBGENE00012652, WBGENE00021073	453	4	3542	5.86424	1	0.884829	84.5576	1.08737
GOTERM_BP_DIRECT	GO:0007281~germ cell development	7	1.20275	0.0892395	WBGENE00004185, WBGENE00004046, WBGENE00002001, WBGENE00019698, WBGENE00001983, WBGENE00001598, WBGENE00003821	453	25	3542	2.18932	1	0.946639	90.4644	1.04944
GOTERM_MF_DIRECT	GO:0004826~phenylalanine-tRNA ligase activity	3	0.515464	0.0838124	WBGENE00001498, WBGENE00021828, WBGENE00001497	462	4	3564	5.78571	1	0.90608	87.4368
GOTERM_CC_DIRECT	GO:0033588~elongator holoenzyme complex	3	0.515464	0.0849548	WBGENE00013738, WBGENE00014123, WBGENE00022463	504	4	3860	5.74405	1	0.447131	40.2418	1.07081
GOTERM_CC_DIRECT	GO:0005732~sno(s)RNA-containing ribonucleoprotein complex	3	0.515464	0.0849548	WBGENE00013544, WBGENE00009132, WBGENE00012964	504	4	3860	5.74405	1	0.447131	40.2418	1.07081
GOTERM_CC_DIRECT	GO:0005840~ribosome	63	10.8247	1.59012e-18	WBGENE00044344, WBGENE00004409, WBGENE00015025, WBGENE00023487, WBGENE00004447, WBGENE00004445, WBGENE00004489, WBGENE00007712, WBGENE00007564, WBGENE00004492, WBGENE00004498, WBGENE00004410, WBGENE00004497, WBGENE00004496, WBGENE00017997, WBGENE00017319, WBGENE00015133, WBGENE00004477, WBGENE00008514, WBGENE00004487, WBGENE00004442, WBGENE00004484, WBGENE00022493, WBGENE00012179, WBGENE00016412,…	504	152	3860	3.17434	3.18023e-16	7.95058e-17	7.15552e-15	17.7986
			WBGENE00004409	rplp-1
			WBGENE00004447	rpl-35A
			WBGENE00004445	rpl-31
			WBGENE00004489	rps-20
			WBGENE00004492	rps-23
			WBGENE00004498	rps-29
			WBGENE00004410	rplp-2.2
			WBGENE00004497	rps-28
	WBGENE00007712	mrpl-34	WBGENE00004496	rps-27
	WBGENE00007564	mrps-22	WBGENE00004477	rps-8
	WBGENE00015025	mrpl-9	WBGENE00004487	rps-18
	WBGENE00023487	mrps-24	WBGENE00004442	rpl-28
	WBGENE00044344	mrpl-39	WBGENE00004484	rps-15
	WBGENE00017997	mrpl-1	WBGENE00012179	rpl-37.1
	WBGENE00017319	mrps-9	WBGENE00004429	rpl-17
	WBGENE00015133	mrpl-11	WBGENE00004428	rpl-13A
	WBGENE00008514	mrpl-44	WBGENE00004427	rpl-15
	WBGENE00016412	mrps-26	WBGENE00004470	rps-3A
	WBGENE00012697	mrps-35	WBGENE00004431	rpl-19
	WBGENE00011883	mrpl-50	WBGENE00004419	rpl-7A
	WBGENE00011247	mrpl-49	WBGENE00004414	rpl-3
	WBGENE00022493	mrpl-45	WBGENE00004413	rpl-8
	WBGENE00044321	mrps-30	WBGENE00004418	rpl-7
	WBGENE00018793	mrpl-40	WBGENE00004415	rpl-4
	WBGENE00015487	mrps-17	WBGENE00004421	rpl-10L
	WBGENE00007859	mrps-31
	WBGENE00020717	mrpl-4
	WBGENE00021327	mrpl-38
	WBGENE00021920	mrps-25
	WBGENE00014224	mrps-23
	WBGENE00016249	mrpl-32
	WBGENE00010905	mrps-34
	WBGENE00012244	mrps-11
	WBGENE00010624	mrps-15
	WBGENE00012645	mrpl-22
	WBGENE00012361	mrpl-12
	WBGENE00021935	mrpl-46
	WBGENE00019076	mrpl-24
	WBGENE00008459	mrpl-53
	WBGENE00012992	mrpl-20
	WBGENE00018932	mrpl-2
	WBGENE00013004	mrpl-37
	WBGENE00011740	mrpl-51
	WBGENE00012830	mrps-28
	WBGENE00015025	mrpl-9
	WBGENE00015487	mrps-17
	WBGENE00020717	mrpl-4
	WBGENE00012992	mrpl-20	WBGENE00004409	rplp-1
	WBGENE00018932	mrpl-2	WBGENE00004447	rpl-35A
	WBGENE00016249	mrpl-32	WBGENE00004445	rpl-31
	WBGENE00012244	mrps-11	WBGENE00004489	rps-20
	WBGENE00017997	mrpl-1	WBGENE00004429	rpl-17
	WBGENE00017319	mrps-9	WBGENE00004428	rpl-13A
	WBGENE00010624	mrps-15	WBGENE00004427	rpl-15
	WBGENE00012645	mrpl-22	WBGENE00004492	rps-23
	WBGENE00019076	mrpl-24	WBGENE00004470	rps-3A
	WBGENE00012361	mrpl-12	WBGENE00004498	rps-29
	WBGENE00015133	mrpl-11	WBGENE00004410	rplp-2.2
			WBGENE00004497	rps-28
			WBGENE00004431	rpl-19
			WBGENE00004496	rps-27
			WBGENE00004419	rpl-7A
			WBGENE00004414	rpl-3
			WBGENE00004479	rps-10
			WBGENE00004413	rpl-8
			WBGENE00004477	rps-8
			WBGENE00004418	rpl-7
			WBGENE00004437	rsl-24D1
			WBGENE00004415	rpl-4
			WBGENE00004421	rpl-10L
			WBGENE00004487	rps-18
			WBGENE00004442	rpl-28
			WBGENE00004484	rps-15
			WBGENE00012179	rpl-37.1

## Sheet: david_Q3
Category	Term	Count	%	PValue	Genes	List Total	Pop Hits	Pop Total	Fold Enrichment	Bonferroni	Benjamini	FDR	negative log10 p value
GOTERM_CC_DIRECT	GO:0005764~lysosome	13	5.05837	2.05114e-05	WBGENE00017881, WBGENE00003828, WBGENE00019895, WBGENE00022642, WBGENE00019105, WBGENE00000786, WBGENE00017071, WBGENE00012747, WBGENE00020509, WBGENE00012497, WBGENE00010769, WBGENE00009192, WBGENE00019619	167	67	3860	4.48476	0.00292887	0.00293314	0.293314	4.688
GOTERM_CC_DIRECT	GO:0005615~extracellular space	14	5.44747	5.32443e-05	WBGENE00022743, WBGENE00022276, WBGENE00001189, WBGENE00000786, WBGENE00000534, WBGENE00009435, WBGENE00012747, WBGENE00010047, WBGENE00003891, WBGENE00009058, WBGENE00012782, WBGENE00011000, WBGENE00013972, WBGENE00011587	167	85	3860	3.80697	0.00758523	0.00380697	0.380697	4.27373
PFAM	PF00059:Lectin_C	7	2.72374	0.000301312	WBGENE00021872, WBGENE00021224, WBGENE00012253, WBGENE00017772, WBGENE00018971, WBGENE00009396, WBGENE00022858	210	20	4208	7.01333	0.0767542	0.0801491	8.01491	3.52098
KEGG_PATHWAY	cel04142:Lysosome	11	4.28016	0.000632191	WBGENE00003828, WBGENE00008741, WBGENE00022642, WBGENE00020509, WBGENE00012144, WBGENE00021160, WBGENE00004313, WBGENE00018700, WBGENE00000786, WBGENE00010769, WBGENE00009192	80	69	1794	3.575	0.0499338	0.0311805	3.11805	3.19915
KEGG_PATHWAY	cel04212:Longevity regulating pathway - worm	9	3.50195	0.000769889	WBGENE00014172, WBGENE00018285, WBGENE00022200, WBGENE00001397, WBGENE00000102, WBGENE00001398, WBGENE00001772, WBGENE00000103, WBGENE00000831	80	47	1794	4.29415	0.0604789	0.0311805	3.11805	3.11357
PFAM	PF18457:PUD1_2	4	1.55642	0.00112147	WBGENE00021236, WBGENE00017500, WBGENE00017498, WBGENE00017501	210	5	4208	16.0305	0.25722	0.149155	14.9155	2.95021
GOTERM_BP_DIRECT	GO:0045087~innate immune response	13	5.05837	0.00273037	WBGENE00020456, WBGENE00014251, WBGENE00014252, WBGENE00000102, WBGENE00001398, WBGENE00001772, WBGENE00019373, WBGENE00000103, WBGENE00003097, WBGENE00003096, WBGENE00007440, WBGENE00009393, WBGENE00019619	165	104	3542	2.68333	0.650982	1	100	2.56378
KEGG_PATHWAY	cel04140:Autophagy - animal	10	3.89105	0.00383278	WBGENE00002173, WBGENE00020334, WBGENE00004310, WBGENE00012497, WBGENE00019427, WBGENE00000102, WBGENE00003476, WBGENE00000786, WBGENE00000103, WBGENE00019748	80	73	1794	3.07192	0.267324	0.103485	10.3485	2.41649
GOTERM_MF_DIRECT	GO:0000146~microfilament motor activity	5	1.94553	0.00413837	WBGENE00002041, WBGENE00003776, WBGENE00002038, WBGENE00019064, WBGENE00015968	167	15	3564	7.11377	0.666777	1	100	2.38317
KEGG_PATHWAY	cel01212:Fatty acid metabolism	8	3.11284	0.00530214	WBGENE00004076, WBGENE00007363, WBGENE00020517, WBGENE00019060, WBGENE00001397, WBGENE00001156, WBGENE00001398, WBGENE00019978	80	50	1794	3.588	0.349891	0.107368	10.7368	2.27555
KEGG_PATHWAY	cel01040:Biosynthesis of unsaturated fatty acids	5	1.94553	0.00665332	WBGENE00007363, WBGENE00020517, WBGENE00019060, WBGENE00001397, WBGENE00001398	80	18	1794	6.22917	0.417671	0.107784	10.7784	2.17696
PFAM	PF00135:COesterase	5	1.94553	0.00844153	WBGENE00015284, WBGENE00010116, WBGENE00011362, WBGENE00019477, WBGENE00001578	210	17	4208	5.89356	0.894231	0.748483	74.8483	2.07358
PFAM	PF04155:Ground-like	3	1.16732	0.0137847	WBGENE00001725, WBGENE00001692, WBGENE00001694	210	4	4208	15.0286	0.974735	0.916679	91.6679	1.8606
GOTERM_CC_DIRECT	GO:0005576~extracellular region	13	5.05837	0.0146111	WBGENE00022642, WBGENE00015393, WBGENE00006928, WBGENE00022276, WBGENE00023485, WBGENE00001694, WBGENE00022515, WBGENE00000534, WBGENE00007764, WBGENE00001692, WBGENE00011894, WBGENE00017688, WBGENE00010769	167	138	3860	2.17738	0.87813	0.696463	69.6463	1.83532
GOTERM_BP_DIRECT	GO:0030036~actin cytoskeleton organization	5	1.94553	0.0168569	WBGENE00004951, WBGENE00000872, WBGENE00009098, WBGENE00019064, WBGENE00004855	165	22	3542	4.87879	0.998563	1	100	1.77322
GOTERM_BP_DIRECT	GO:0036499~PERK-mediated unfolded protein response	4	1.55642	0.0197823	WBGENE00015295, WBGENE00020456, WBGENE00018971, WBGENE00012144	165	13	3542	6.60513	0.999544	1	100	1.70372
GOTERM_BP_DIRECT	GO:0006629~lipid metabolic process	9	3.50195	0.0198194	WBGENE00020662, WBGENE00022642, WBGENE00022200, WBGENE00044488, WBGENE00013035, WBGENE00018657, WBGENE00003476, WBGENE00001398, WBGENE00019747	165	74	3542	2.61081	0.99955	1	100	1.70291
GOTERM_CC_DIRECT	GO:0016460~myosin II complex	4	1.55642	0.0200369	WBGENE00003776, WBGENE00023451, WBGENE00019064, WBGENE00015968	167	14	3860	6.60393	0.944666	0.71632	71.632	1.69817
GOTERM_BP_DIRECT	GO:0006189~'de novo' IMP biosynthetic process	3	1.16732	0.0282638	WBGENE00008654, WBGENE00015116, WBGENE00018174	165	6	3542	10.7333	0.999984	1	100	1.54877
PFAM	PF00063:Myosin_head	4	1.55642	0.0292915	WBGENE00002041, WBGENE00003776, WBGENE00002038, WBGENE00019064	210	14	4208	5.72517	0.999621	1	100	1.53326
GOTERM_MF_DIRECT	GO:0004553~hydrolase activity, hydrolyzing O-glycosyl compounds	4	1.55642	0.0298678	WBGENE00019895, WBGENE00020509, WBGENE00016848, WBGENE00017071	167	15	3564	5.69102	0.999676	1	100	1.5248
GOTERM_MF_DIRECT	GO:0051015~actin filament binding	8	3.11284	0.0299661	WBGENE00002041, WBGENE00003776, WBGENE00002038, WBGENE00004951, WBGENE00019064, WBGENE00006436, WBGENE00015968, WBGENE00004855	167	65	3564	2.62662	0.999685	1	100	1.52337
GOTERM_BP_DIRECT	GO:0006631~fatty acid metabolic process	7	2.72374	0.0313528	WBGENE00019060, WBGENE00007680, WBGENE00001398, WBGENE00010769, WBGENE00009192, WBGENE00019978, WBGENE00017659	165	52	3542	2.88974	0.999995	1	100	1.50372
GOTERM_CC_DIRECT	GO:0034045~phagophore assembly site membrane	3	1.16732	0.0334782	WBGENE00020334, WBGENE00019427, WBGENE00019748	167	7	3860	9.9059	0.992322	0.924784	92.4784	1.47524
GOTERM_BP_DIRECT	GO:0006869~lipid transport	5	1.94553	0.0338236	WBGENE00008832, WBGENE00011629, WBGENE00006928, WBGENE00000421, WBGENE00019748	165	27	3542	3.97531	0.999998	1	100	1.47078
GOTERM_BP_DIRECT	GO:0061709~reticulophagy	3	1.16732	0.0383804	WBGENE00305157, WBGENE00020334, WBGENE00019748	165	7	3542	9.2	1	1	100	1.41589
GOTERM_CC_DIRECT	GO:0005777~peroxisome	6	2.33463	0.0388021	WBGENE00014251, WBGENE00007175, WBGENE00022200, WBGENE00019060, WBGENE00001578, WBGENE00000831	167	44	3860	3.15188	0.996515	0.924784	92.4784	1.41114
GOTERM_MF_DIRECT	GO:0017064~fatty acid amide hydrolase activity	3	1.16732	0.0388044	WBGENE00015048, WBGENE00010769, WBGENE00009192	167	7	3564	9.14628	0.999972	1	100	1.41112
GOTERM_BP_DIRECT	GO:0006508~proteolysis	13	5.05837	0.0412659	WBGENE00014172, WBGENE00017881, WBGENE00019105, WBGENE00001056, WBGENE00001189, WBGENE00000786, WBGENE00008741, WBGENE00012747, WBGENE00012144, WBGENE00011000, WBGENE00020082, WBGENE00011587, WBGENE00019619	165	149	3542	1.87293	1	1	100	1.38441
GOTERM_MF_DIRECT	GO:0003774~cytoskeletal motor activity	4	1.55642	0.0417093	WBGENE00002041, WBGENE00003776, WBGENE00002038, WBGENE00019064	167	17	3564	5.02149	0.999988	1	100	1.37977
GOTERM_MF_DIRECT	GO:0052689~carboxylic ester hydrolase activity	4	1.55642	0.0483879	WBGENE00010116, WBGENE00011362, WBGENE00019477, WBGENE00001578	167	18	3564	4.74251	0.999998	1	100	1.31526
PFAM	PF00092:VWA	4	1.55642	0.0490748	WBGENE00016048, WBGENE00009393, WBGENE00009396, WBGENE00022858	210	17	4208	4.71485	0.999998	1	100	1.30914
KEGG_PATHWAY	cel01100:Metabolic pathways	39	15.1751	0.0516682	WBGENE00014251, WBGENE00020517, WBGENE00019060, WBGENE00001397, WBGENE00003476, WBGENE00001398, WBGENE00001156, WBGENE00001772, WBGENE00018174, WBGENE00003778, WBGENE00000766, WBGENE00008654, WBGENE00004076, WBGENE00012407, WBGENE00007363, WBGENE00015116, WBGENE00010408, WBGENE00010308, WBGENE00011399, WBGENE00010769, WBGENE00016848, WBGENE00019978, WBGENE00012326, WBGENE00019730, WBGENE00015551,…	80	694	1794	1.26019	0.986392	0.697521	69.7521	1.28678
GOTERM_CC_DIRECT	GO:0016459~myosin complex	4	1.55642	0.052013	WBGENE00002041, WBGENE00003776, WBGENE00002038, WBGENE00019064	167	20	3860	4.62275	0.999518	1	100	1.28389
GOTERM_BP_DIRECT	GO:0050830~defense response to Gram-positive bacterium	5	1.94553	0.058052	WBGENE00002271, WBGENE00003096, WBGENE00019427, WBGENE00001898, WBGENE00007009	165	32	3542	3.35417	1	1	100	1.23618
KEGG_PATHWAY	cel00062:Fatty acid elongation	4	1.55642	0.0617369	WBGENE00007363, WBGENE00020517, WBGENE00001156, WBGENE00019978	80	21	1794	4.27143	0.994268	0.714384	71.4384	1.20946
GOTERM_BP_DIRECT	GO:0006541~glutamine metabolic process	3	1.16732	0.0619226	WBGENE00019730, WBGENE00008654, WBGENE00012326	165	9	3542	7.15556	1	1	100	1.20815
GOTERM_CC_DIRECT	GO:0016020~membrane	56	21.7899	0.0650367	WBGENE00019465, WBGENE00017362, WBGENE00018374, WBGENE00003476, WBGENE00004169, WBGENE00010047, WBGENE00010408, WBGENE00008296, WBGENE00007680, WBGENE00019978, WBGENE00015295, WBGENE00019895, WBGENE00018044, WBGENE00044457, WBGENE00000277, WBGENE00019373, WBGENE00019493, WBGENE00003943, WBGENE00017071, WBGENE00003151, WBGENE00001491, WBGENE00004003, WBGENE00020509, WBGENE00011000, WBGENE00012497,…	167	1067	3860	1.21309	0.999933	1	100	1.18684
PFAM	PF01764:Lipase_3	3	1.16732	0.070197	WBGENE00020662, WBGENE00044488, WBGENE00013035	210	9	4208	6.67937	1	1	100	1.15368
GOTERM_MF_DIRECT	GO:0030246~carbohydrate binding	5	1.94553	0.0773884	WBGENE00019895, WBGENE00002271, WBGENE00017772, WBGENE00021020, WBGENE00017071	167	35	3564	3.04876	1	1	100	1.11132
GOTERM_CC_DIRECT	GO:0032982~myosin filament	3	1.16732	0.0783653	WBGENE00003776, WBGENE00019064, WBGENE00015968	167	11	3860	6.30376	0.999991	1	100	1.10588
GOTERM_BP_DIRECT	GO:0007165~signal transduction	8	3.11284	0.0791028	WBGENE00003097, WBGENE00021324, WBGENE00003096, WBGENE00010115, WBGENE00004310, WBGENE00015561, WBGENE00014213, WBGENE00011995	165	81	3542	2.12016	1	1	100	1.10181
GOTERM_CC_DIRECT	GO:0044840~gut granule	2	0.77821	0.0841716	WBGENE00011083, WBGENE00003410	167	2	3860	23.1138	0.999997	1	100	1.07483
PFAM	PF01579:DUF19	3	1.16732	0.0849511	WBGENE00017362, WBGENE00015393, WBGENE00008390	210	10	4208	6.01143	1	1	100	1.07083
PFAM	PF00026:Asp	3	1.16732	0.0849511	WBGENE00017881, WBGENE00019105, WBGENE00019619	210	10	4208	6.01143	1	1	100	1.07083
GOTERM_BP_DIRECT	GO:0006164~purine nucleotide biosynthetic process	3	1.16732	0.0890798	WBGENE00008654, WBGENE00015116, WBGENE00018174	165	11	3542	5.85455	1	1	100	1.05022
GOTERM_MF_DIRECT	GO:0004190~aspartic-type endopeptidase activity	3	1.16732	0.0899987	WBGENE00017881, WBGENE00019105, WBGENE00019619	167	11	3564	5.82036	1	1	100	1.04576
GOTERM_BP_DIRECT	GO:0006046~N-acetylglucosamine catabolic process	2	0.77821	0.0904717	WBGENE00010308, WBGENE00011399	165	2	3542	21.4667	1	1	100	1.04349
GOTERM_BP_DIRECT	GO:0010877~lipid transport involved in lipid storage	2	0.77821	0.0904717	WBGENE00003410, WBGENE00003943	165	2	3542	21.4667	1	1	100	1.04349
GOTERM_BP_DIRECT	GO:0006044~N-acetylglucosamine metabolic process	2	0.77821	0.0904717	WBGENE00010308, WBGENE00011399	165	2	3542	21.4667	1	1	100	1.04349
GOTERM_MF_DIRECT	GO:0017040~N-acylsphingosine amidohydrolase activity	2	0.77821	0.0909968	WBGENE00010769, WBGENE00009192	167	2	3564	21.3413	1	1	100	1.04097
GOTERM_MF_DIRECT	GO:0016874~ligase activity	6	2.33463	0.0923138	WBGENE00019730, WBGENE00008654, WBGENE00004076, WBGENE00015116, WBGENE00007969, WBGENE00018174	167	52	3564	2.46246	1	1	100	1.03473
KEGG_PATHWAY	cel00600:Sphingolipid metabolism	4	1.55642	0.0942745	WBGENE00020509, WBGENE00021160, WBGENE00010769, WBGENE00009192	80	25	1794	3.588	0.999671	0.760856	76.0856	1.02561
PFAM	PF02275:CBAH	2	0.77821	0.096879	WBGENE00010769, WBGENE00009192	210	2	4208	20.0381	1	1	100	1.01377
PFAM	PF00088:Trefoil	2	0.77821	0.096879	WBGENE00019895, WBGENE00017071	210	2	4208	20.0381	1	1	100	1.01377
PFAM	PF15508:NAAA-beta	2	0.77821	0.096879	WBGENE00010769, WBGENE00009192	210	2	4208	20.0381	1	1	100	1.01377
